# Supplementary material for: Expanding the human metaproteome: enhancing small open reading frame (smORF) prediction and ultra-deep detection of smORF-encoded proteins in the gut microbiome
Source: Research Square preprint supplement (doi:10.21203/rs.3.rs-7768562/v1), 2025-11-06
Supplement: Supplementary file 1 [file 66e00246f00db4549033a35c.xlsx]

## Sheet: GlobalProteinFunction
function_type	function	description	BHC02_Pellet_AS	BHC02_Pellet_AS_Npeptides	BHC03_Pellet_AS	BHC03_Pellet_AS_Npeptides	BHC12_Pellet_AS	BHC12_Pellet_AS_Npeptides	BHC13_Pellet_AS	BHC13_Pellet_AS_Npeptides	BHC15_Pellet_AS	BHC15_Pellet_AS_Npeptides	BHC17_Pellet_AS	BHC17_Pellet_AS_Npeptides	BHC18_Pellet_AS	BHC18_Pellet_AS_Npeptides	BHC19_Pellet_AS	BHC19_Pellet_AS_Npeptides	BHC20_Pellet_AS	BHC20_Pellet_AS_Npeptides	BHC25_Pellet_AS	BHC25_Pellet_AS_Npeptides	BHC27_Pellet_AS	BHC27_Pellet_AS_Npeptides	BHC28_Pellet_AS	BHC28_Pellet_AS_Npeptides	BHC29_Pellet_AS	BHC29_Pellet_AS_Npeptides	BHC31_Pellet_AS	BHC31_Pellet_AS_Npeptides	BHC32_Pellet_AS	BHC32_Pellet_AS_Npeptides	KHC01_Pellet_AS	KHC01_Pellet_AS_Npeptides	KHC02_Pellet_AS	KHC02_Pellet_AS_Npeptides	KHC03_Pellet_AS	KHC03_Pellet_AS_Npeptides	KHC04_Pellet_AS	KHC04_Pellet_AS_Npeptides	KHC06_Pellet_AS	KHC06_Pellet_AS_Npeptides	KHC07_Pellet_AS	KHC07_Pellet_AS_Npeptides	KHC08_Pellet_AS	KHC08_Pellet_AS_Npeptides	KHC09_Pellet_AS	KHC09_Pellet_AS_Npeptides	KHC10_Pellet_AS
PUF	unannotated		0.0324735	3223	0.028789	4396	0.046131	4756	0.0549569	4585	0.024833	3043	0.0303826	3876	0.0332134	3918	0.0412147	4475	0.0275417	3107	0.0585532	4610	0.0352246	4214	0.0223188	2406	0.0364083	4628	0.0329028	3231	0.0596646	3852	0.0402503	4754	0.0295622	4516	0.0314965	4099	0.0439399	4776	0.0373478	4492	0.0370806	4730	0.0354249	3799	0.0315422	4529	0.0337158
arcog	arCOG00028																				2.59406e-05	5									3.32996e-06	2
arcog	arCOG00058																				1.52324e-05	7
arcog	arCOG00061																				1.33194e-05	8
arcog	arCOG00064						3.9847e-07	1													3.34625e-05	10	4.34568e-07	1							2.82181e-06	2
arcog	arCOG00068																				2.12194e-05	5									1.24515e-06	1
arcog	arCOG00070						8.32529e-07	1					1.20009e-06	1							9.17788e-05	21	1.47217e-06	1			7.85671e-06	6			5.55635e-06	3							1.14727e-06	1	5.26527e-07	1	1.4077e-06	1					3.15104e-07
arcog	arCOG00082						1.6042e-06	1													0.000198739	23	7.79708e-06	3			1.51422e-05	9			3.45736e-05	8									2.26386e-06	2	6.87105e-06	3
arcog	arCOG00097						7.68552e-06	2													0.000280329	13	2.07606e-05	7			3.27262e-05	8			7.06157e-05	7									1.78245e-05	7	2.80748e-05	7					2.31081e-07
arcog	arCOG00103						9.13264e-06	4					4.82769e-07	1							0.000416025	33	1.52539e-05	4			2.96722e-05	12			5.51025e-05	9							8.53874e-07	1	1.12853e-05	7	2.60406e-05	9					4.06165e-06
arcog	arCOG00112																				0.000103394	16	4.71169e-06	3			8.37177e-06	6			4.22472e-06	3									0	0	8.44844e-06	4
arcog	arCOG00118						7.32367e-07	1									1.89199e-06	1			7.78662e-05	17					1.65599e-06	2			1.42324e-05	5									0	0	1.79568e-06	2
arcog	arCOG00185						5.75262e-07	1													0.000110856	20	3.82237e-06	3			4.58069e-06	4			1.09118e-05	4							6.65194e-07	1	1.93961e-06	2	3.46201e-06	2
arcog	arCOG00202																				8.71183e-06	4
arcog	arCOG00223																				2.73868e-05	6	1.75728e-06	2
arcog	arCOG00228																				2.88283e-05	7	1.75728e-06	2			4.1783e-06	2			1.76622e-06	1									0	0	7.29608e-06	2
arcog	arCOG00250						1.28883e-06	1													5.8037e-05	10	3.11157e-06	2			8.30968e-07	1			1.11245e-05	3									0	0
arcog	arCOG00322																				5.08504e-06	2
arcog	arCOG00338						1.57999e-05	4													0.000523527	17	3.5362e-05	5			7.76836e-05	12			7.74046e-05	7							4.51046e-05	4	4.29482e-05	8	4.16842e-05	5	1.09629e-06	1			4.48894e-06
arcog	arCOG00359																														2.16914e-06	2											2.51594e-06	1
arcog	arCOG00401																				3.32719e-05	9	6.41205e-07	1			7.28591e-07	1			8.51728e-06	4											9.01707e-07	1	1.06791e-06	1
arcog	arCOG00406						7.22134e-07	1													5.48102e-05	13	5.54461e-06	4			2.34774e-06	2			9.27782e-06	4									1.13982e-06	2	2.93653e-06	2
arcog	arCOG00410																				2.88891e-06	2									1.01559e-06	1											5.14994e-07	1
arcog	arCOG00457						2.59451e-06	1													0.000172012	14	2.36948e-06	1			7.4957e-06	4			5.01105e-06	1							9.73597e-07	1	6.65836e-06	2	1.04189e-05	3					8.59322e-07
arcog	arCOG00487																				4.22825e-05	11									1.50414e-05	6											5.57288e-07	1
arcog	arCOG00488						1.12983e-06	1													5.88101e-05	10					6.29505e-07	1			1.40939e-05	4									0	0	1.91937e-06	2
arcog	arCOG00493						9.47857e-07	1													7.25715e-05	18	2.13405e-06	1			1.82422e-06	2			9.64719e-06	4									1.31429e-06	1	2.55144e-06	1					6.21337e-07
arcog	arCOG00495																				1.29199e-05	7					7.27856e-07	1															5.90298e-07	1
arcog	arCOG00509						7.73235e-07	1													0.000600857	55	6.83805e-05	13			5.59507e-05	18			0.000122643	17							2.18905e-05	9	6.70313e-06	3	7.50169e-05	14					5.69559e-06
arcog	arCOG00570						7.66285e-07	1													9.92355e-05	14	6.63903e-06	3			6.81964e-06	4			2.79926e-05	6									4.84421e-06	3	1.10273e-05	6					1.4754e-06
arcog	arCOG00585																				3.389e-05	10	7.55584e-07	1			4.52694e-07	1											5.14427e-07	1
arcog	arCOG00600						9.09666e-06	5													0.000452621	55	9.79166e-06	6			2.15308e-05	13			4.13843e-05	12							7.57566e-06	6	2.37581e-06	2	1.88169e-05	7					7.65685e-07
arcog	arCOG00606						0	0													1.59196e-05	4					1.17476e-06	1			1.99579e-06	1
arcog	arCOG00612																				6.27985e-05	16	1.31029e-06	1			3.57994e-06	5			9.83016e-06	4											4.86094e-06	4
arcog	arCOG00639						6.55638e-07	1													2.88192e-05	6									1.50323e-05	3									5.2592e-07	1	1.3252e-06	1
arcog	arCOG00665																				1.86175e-05	5
arcog	arCOG00779						2.19026e-06	1													6.10033e-05	8	4.38588e-06	2			3.17757e-06	2			1.00759e-05	2							0	0	1.40878e-06	1	3.68128e-06	1					7.89186e-07
arcog	arCOG00780						5.61493e-06	2													9.45013e-05	9	6.78383e-06	2			5.41588e-06	2			9.31827e-06	2									4.02782e-06	2							9.12041e-07
arcog	arCOG00810																				8.86591e-06	2																			0	0
arcog	arCOG00856						1.93778e-06	1	2.3924e-05	6											9.29165e-06	4	1.46889e-06	2					2.59285e-06	2	9.8567e-07	1			2.52209e-06	2	2.53091e-06	3			4.89687e-06	4	6.39769e-07	1
arcog	arCOG00861																				2.44845e-05	8									1.06596e-06	1									0	0	5.85099e-07	1
arcog	arCOG00865						1.26499e-05	5													0.000211611	20	1.70826e-05	6			3.27326e-05	11			6.13005e-05	9									5.02854e-06	3	2.10894e-05	8					2.49369e-06
arcog	arCOG00868						3.1057e-05	10					9.2525e-07	1							0.000451282	28	3.51518e-05	9			5.29179e-05	15			0.000108805	13							2.8833e-05	8	1.68503e-05	7	4.82844e-05	12					1.78068e-05
arcog	arCOG00869						8.29143e-07	1													6.71069e-05	9	7.28147e-06	4			3.97274e-06	3			1.13125e-05	4							7.61456e-06	4	0	0	1.50604e-05	5
arcog	arCOG00918																				1.13239e-05	5
arcog	arCOG00922																				1.10494e-06	2
arcog	arCOG00933						7.03538e-07	1													8.02668e-05	15	2.68181e-06	2			7.28911e-07	1			1.75546e-05	7									0	0	4.57121e-06	4
arcog	arCOG00964						3.01812e-05	5													0.000556948	19	6.48892e-05	7			8.57904e-05	13			0.000119284	12							2.30131e-05	5	4.65477e-05	8	4.46146e-05	6	1.51243e-06	1			6.44135e-06
arcog	arCOG00971																				6.35585e-05	8	1.86776e-06	2			2.3293e-06	2			1.57369e-06	1									5.48386e-07	1
arcog	arCOG00980						3.99219e-06	2													0.000180049	21	1.331e-05	6			7.97438e-06	5			2.06634e-05	6							6.26841e-06	4	0	0	6.86152e-06	3
arcog	arCOG00998																				9.10084e-05	6	3.90027e-06	1			7.14865e-06	2			6.46982e-06	1									3.48269e-06	1	9.93641e-06	2
arcog	arCOG01039						1.00252e-06	1													5.22976e-05	9	3.34408e-06	2			3.5234e-06	3			2.00584e-06	1							6.17929e-07	1	3.78166e-06	3	4.45777e-06	2
arcog	arCOG01087																				2.17974e-05	6									1.46971e-06	1
arcog	arCOG01095						0	0													0.000124281	7	7.92012e-07	1			1.3339e-06	1							3.51209e-07	1			6.4729e-07	1	1.27292e-05	2	1.27826e-05	2
arcog	arCOG01097		1.39706e-05	4			4.43678e-05	7	3.08889e-05	5			4.83394e-06	3							0.00107389	23	9.4839e-05	10			0.000133857	15			9.8027e-05	11							1.50654e-05	2	5.58616e-05	8	0.000162868	13			1.28976e-05	5	1.88708e-05
arcog	arCOG01111						4.9776e-06	3													0.000214268	32	1.08188e-05	6			6.90166e-06	5			5.41001e-05	11									4.5823e-06	4	1.57412e-05	7					8.10906e-07
arcog	arCOG01123																				3.22525e-06	2
arcog	arCOG01130																				6.34452e-06	3																					3.71798e-07	1
arcog	arCOG01133						1.62671e-06	2													5.21301e-05	13									7.04734e-06	3							7.95715e-07	1									8.91868e-07
arcog	arCOG01145																				2.45161e-05	3									4.69421e-06	2									0	0
arcog	arCOG01158																				1.51389e-06	1																			0	0
arcog	arCOG01159																				1.51389e-06	1																			0	0
arcog	arCOG01169								2.40325e-06	1											0.00011333	11	4.00982e-06	1							2.43285e-05	5									2.76756e-06	2	6.79309e-06	2					1.32324e-06
arcog	arCOG01257						5.70196e-05	18					1.71866e-06	1							0.000797686	76	7.30025e-05	21			8.763e-05	28			0.000167832	29									1.10513e-05	9	4.46061e-05	15					6.24431e-06
arcog	arCOG01259		1.1522e-05	5			6.83844e-06	4	2.98896e-05	3											1.52234e-05	4	4.77237e-06	2			7.3494e-06	3			0.00012875	11			1.7559e-06	1					4.74947e-06	3	6.85369e-06	3					1.31099e-06
arcog	arCOG01278						0	0													0.000200918	23	7.21519e-06	3			1.16249e-05	7			4.03029e-05	7							1.99248e-06	1	3.71395e-06	3	1.29082e-05	5
arcog	arCOG01285																				6.82525e-05	10					1.5135e-06	1													0	0	2.38878e-06	1
arcog	arCOG01308																				6.52691e-05	24	2.48301e-07	1			6.75054e-07	1			1.1195e-05	5
arcog	arCOG01320						1.77246e-06	2													2.97096e-05	5	1.83313e-06	2			9.08131e-07	1			6.67231e-06	2									0	0	8.36665e-07	1
arcog	arCOG01322																				2.11546e-06	1
arcog	arCOG01337						6.5307e-07	1													3.95191e-05	12	9.63896e-07	1			1.31902e-06	2			3.18926e-06	2											2.76384e-06	2
arcog	arCOG01338						7.36502e-07	1													0.00015746	19	5.80835e-06	4			3.81174e-06	3			3.06472e-05	9									4.79047e-06	5	4.57277e-06	3
arcog	arCOG01340						7.36502e-07	1													0.000208011	33	5.80835e-06	4			7.3755e-06	6			3.06472e-05	9									4.79047e-06	5	4.57277e-06	3
arcog	arCOG01341																				9.91916e-06	3
arcog	arCOG01344						2.90379e-06	1					8.08714e-07	1							9.57337e-05	8	3.70213e-06	1			3.79086e-06	1			5.74628e-06	2							4.67896e-06	2	3.92762e-06	2	1.22461e-05	3					1.49213e-06
arcog	arCOG01352						1.02963e-05	5					9.23368e-07	1							0.000250791	27	2.3207e-05	5			4.3139e-05	16			2.74013e-05	6							1.23201e-05	6	1.21538e-05	5	1.52901e-05	4					1.02843e-06
arcog	arCOG01381																				7.8881e-06	3													2.75845e-07	1
arcog	arCOG01430																				1.87429e-05	8													5.43414e-06	3	4.54802e-06	1			0	0
arcog	arCOG01459						6.51351e-07	1															5.969e-06	4			1.38539e-05	8			9.84707e-05	15									0	0	1.9239e-05	7
arcog	arCOG01491						1.85341e-05	3					1.23417e-06	1							0.00251178	50					0.000258192	28			0.00041502	24									0.000175726	25	0.000254353	27					2.66871e-05
arcog	arCOG01499						2.00293e-05	6													0.000539028	24	4.16357e-05	9			3.42786e-05	8			0.00012043	12									2.41162e-05	7	3.1599e-05	8					2.1665e-06
arcog	arCOG01502																				1.5171e-05	3	1.21944e-06	1			8.33446e-07	1			4.49734e-06	1
arcog	arCOG01518						1.20844e-06	1													7.97407e-05	14	1.139e-05	5			7.81504e-06	5			1.09797e-05	3							5.24689e-06	2			8.75927e-07	1
arcog	arCOG01549						0.00012971	21					7.22541e-07	1							0.0027579	67	0.000275979	27			0.000367019	45			0.000765431	43							8.22599e-05	16	0.00021199	29	0.000223505	29	1.41798e-05	8			3.21964e-05
arcog	arCOG01559						1.69437e-05	10													0.000388813	47	3.75685e-05	16			4.78364e-05	22			8.80382e-05	18									8.18179e-06	6	3.90963e-05	16					2.19099e-06
arcog	arCOG01561						0.000170006	22					2.97149e-05	11							0.00205812	44	0.000255012	23			0.000334878	40			0.000768306	39							0.000164526	16	0.000138855	19	0.000285054	24					7.58805e-05
arcog	arCOG01567																																										8.18679e-06	1			4.46375e-07	1
arcog	arCOG01576						1.3428e-06	1													1.9105e-05	9									5.24184e-06	3							2.63138e-06	2			1.47079e-06	1
arcog	arCOG01580						6.69849e-06	3													5.90525e-05	7	6.1749e-06	2			9.73266e-06	3			2.42432e-06	1									2.47958e-06	1	8.29515e-06	3
arcog	arCOG01590						4.74829e-07	1													4.92254e-05	14									6.56607e-06	3							3.89786e-07	1	0	0
arcog	arCOG01594																				8.11173e-05	24	0	0							7.45934e-06	4									0	0	5.31039e-07	1
arcog	arCOG01602																				1.0209e-05	4	6.2198e-07	1							2.55956e-06	2											1.01574e-06	1
arcog	arCOG01603						2.51606e-06	2													6.73727e-05	14	3.23056e-06	2			3.23613e-06	3			1.01008e-05	3							1.35277e-06	1	8.01564e-07	1	8.03479e-06	5
arcog	arCOG01608						2.59628e-06	1													9.38027e-05	15	8.07822e-06	3			1.08474e-05	6			2.48707e-05	6							1.56572e-06	1	0	0	4.47664e-06	2
arcog	arCOG01622																				7.49728e-05	13									1.91884e-05	4									0	0
arcog	arCOG01671																				1.89738e-05	6									1.17428e-06	1									0	0
arcog	arCOG01678						2.42484e-06	2													0.000180077	25	2.72324e-06	2			2.96857e-06	2			2.03903e-05	5							2.34855e-06	1	6.07556e-07	1	3.52208e-06	1
arcog	arCOG01696																				2.31523e-05	11
arcog	arCOG01711						2.09253e-06	1													3.9666e-05	6	6.63657e-06	3			5.44335e-06	2			3.33299e-06	2									5.44342e-06	3	9.02465e-06	2
arcog	arCOG01713																				7.24564e-06	1
arcog	arCOG01715																				6.07252e-05	12					1.4433e-06	1			3.46282e-06	1									0	0
arcog	arCOG01717																				1.05087e-05	5									1.05231e-06	1
arcog	arCOG01722						3.31993e-06	1													8.29007e-05	7	6.53168e-06	2			1.2218e-06	1			1.15831e-05	2							1.37156e-06	1	0	0	1.05982e-05	3
arcog	arCOG01726																				3.73183e-05	7																					3.22136e-06	2
arcog	arCOG01731
arcog	arCOG01742																				1.05401e-05	4									9.25724e-07	1
arcog	arCOG01747						2.74361e-06	2													7.84935e-05	17					2.27295e-06	2			2.68307e-06	1									0	0	9.25315e-06	6
arcog	arCOG01751						1.10838e-05	3													9.73071e-05	5	1.98193e-05	3			1.91684e-05	4			2.35867e-05	3									7.2684e-06	2	1.86433e-05	3					6.67997e-06
arcog	arCOG01752						0	0													4.37676e-05	4	2.3967e-06	1			5.37569e-06	2			1.04817e-05	2											7.21233e-06	2
arcog	arCOG01754																				0.000180972	27	4.4526e-06	4			3.27513e-06	3			2.1207e-05	8									0	0	5.56095e-06	4
arcog	arCOG01758						2.28435e-06	1													6.97439e-05	6	1.7668e-06	1			1.90052e-06	1			2.49015e-06	1							1.08301e-06	1	2.26322e-06	2	5.06125e-06	2					8.9985e-07
arcog	arCOG01762																				8.25869e-05	20					2.42119e-06	3			8.6112e-06	4									8.33925e-06	1	9.36172e-07	1
arcog	arCOG01764						9.85893e-07	1													5.56175e-05	8	2.35535e-06	2			4.85666e-06	3			5.77937e-06	2							3.15043e-06	1	1.99941e-06	1	3.86179e-06	2
arcog	arCOG01767						6.42627e-07	1													0.000167187	19	4.32113e-06	3			5.52248e-06	5			3.59926e-05	6									1.1883e-06	2	7.52562e-06	4
arcog	arCOG01799																				3.84195e-05	6									1.0847e-05	3											4.70595e-06	2
arcog	arCOG01803																				1.89719e-05	5					2.5365e-07	1			2.82364e-06	2									3.61257e-07	1	4.04663e-07	1
arcog	arCOG01845																				6.16659e-05	5	9.62764e-07	1																	0	0	0	0
arcog	arCOG01865																				1.18618e-05	5					7.01129e-07	1			4.27914e-06	2											6.32683e-07	1
arcog	arCOG01886																				5.59627e-06	2	6.43964e-07	1							9.00422e-07	1
arcog	arCOG01909						0	0													0.000108749	17	1.04853e-05	4			3.74351e-05	13			1.42875e-05	4											7.52567e-06	4
arcog	arCOG01911																		1.5398e-06	1					6.34663e-06	3
arcog	arCOG01940																				1.22321e-05	4					0	0	8.4084e-07	1
arcog	arCOG01946																				9.0348e-05	6	8.55758e-06	2			7.73308e-06	3			2.65807e-05	3							4.34833e-06	2	6.17038e-06	2	4.41271e-06	2
arcog	arCOG01963																				1.04898e-05	4	7.8077e-07	1			4.34499e-07	1			9.57114e-07	1											5.46681e-07	1
arcog	arCOG01972																				1.65499e-05	2					9.85495e-07	1													0	0
arcog	arCOG01988						1.59225e-06	1													3.20306e-05	6					2.4258e-06	2													1.04823e-06	1	2.64367e-06	1					5.39673e-07
arcog	arCOG02053						2.94514e-06	1													0.000259027	24	4.01238e-06	1			1.01397e-05	4			9.69273e-06	2							1.18967e-05	3	1.88608e-06	1	5.95019e-06	3					1.18203e-06
arcog	arCOG02077								1.25302e-06	1			8.78001e-07	1			2.95885e-05	4			1.92642e-06	1	4.55321e-06	2			8.97515e-06	2			6.0645e-06	2			1.10185e-05	1	3.10166e-06	2	3.28996e-05	7	1.12977e-05	3	1.18497e-05	2	2.96151e-06	1	4.6921e-06	2	7.63994e-06
arcog	arCOG02144						5.15624e-05	7					1.9917e-05	4							0.00041088	18	2.57508e-05	4			2.87533e-05	7			2.94966e-05	3							1.60151e-05	3	1.01772e-05	2	0.000316787	9
arcog	arCOG02146						2.17157e-06	1													0.000306404	11	5.11357e-06	2			2.39896e-05	7			4.64502e-05	6							6.3983e-06	2	1.49199e-05	4	8.90305e-06	2
arcog	arCOG02148						2.51661e-06	1													4.81156e-05	8					2.74514e-06	2			1.63951e-06	1									2.96522e-06	2	6.18431e-06	2
arcog	arCOG02155						6.78653e-06	2													0.000364956	39	2.94564e-05	8			3.19004e-05	13			3.39362e-05	11									1.16432e-05	7	4.58356e-05	15					3.64604e-06
arcog	arCOG02180						1.1563e-05	4													0.000292736	23	2.24072e-05	4			3.01196e-05	9			7.90844e-05	8									1.88701e-05	8	2.07296e-05	6					3.05142e-06
arcog	arCOG02181						5.25607e-06	2													0.00023482	15	2.85118e-05	6			2.63101e-05	6			6.15285e-05	5									2.06963e-05	6	3.74427e-06	2
arcog	arCOG02201						6.60452e-06	4													0.000130474	18	6.79054e-06	3			6.62766e-06	4			3.9119e-05	8									2.49318e-06	2	1.31984e-05	5					1.49132e-06
arcog	arCOG02235						0.00011803	18					7.0159e-07	1							0.00198345	60	0.000196607	21			0.000285096	38			0.000602072	34							5.67281e-05	12	0.000146883	23	0.000159238	18	1.01439e-05	6			2.84725e-05
arcog	arCOG02263																				9.68749e-06	3
arcog	arCOG02287																				1.20746e-05	3									1.51605e-06	1
arcog	arCOG02289						2.51403e-06	2													1.84806e-05	4					1.8134e-06	1			3.1984e-06	2											1.77307e-06	2
arcog	arCOG02297						1.76581e-06	1													4.42275e-05	9	2.26762e-06	1			1.08294e-06	1			4.86895e-06	1							7.52851e-07	1	0	0	5.21074e-06	2
arcog	arCOG02410						0.000376436	16					7.5192e-05	14							0.0036287	28	0.00042744	19			0.000376557	21			0.00111473	22									9.73558e-05	6	0.000598495	21					0.000182385
arcog	arCOG02430						3.51071e-06	2													0.000361114	20	1.01339e-05	4			1.01487e-06	2			3.4679e-05	9									1.76734e-06	1	1.49548e-06	1
arcog	arCOG02459																				1.66609e-05	5									3.37291e-06	2											7.62369e-07	1
arcog	arCOG02472						2.04212e-05	5					1.19408e-06	1							0.000594796	22	7.3289e-05	9			5.42546e-05	12			0.000120889	9							1.39911e-05	4	3.19707e-05	4	6.27837e-05	8	4.64677e-07	1			5.98489e-06
arcog	arCOG02473						2.21091e-05	5													0.000289169	13	1.9533e-05	5			3.11656e-05	7			0.000111497	6									3.4029e-05	7	2.84036e-05	5					7.18042e-07
arcog	arCOG02475						2.92124e-05	4													0.000587908	17	5.68635e-05	7			8.98566e-05	14			0.000216083	12							2.76327e-05	6	5.52581e-05	6	3.77679e-05	6					6.02324e-06
arcog	arCOG02486						9.49267e-06	5					2.88542e-06	2							0.000149875	41	1.72906e-05	6			2.52295e-05	14			0.00017807	36									3.80846e-05	20	1.71975e-05	6					8.0064e-06
arcog	arCOG02487						4.17185e-06	2													0.000137447	44	2.98002e-06	2			4.03202e-05	25			0.000237023	49							0.0001822	46	4.93112e-05	22	7.25145e-06	3					1.70123e-06
arcog	arCOG02488						8.62798e-07	1													0.000106654	29	2.04922e-05	10			1.42513e-05	9			3.76088e-05	11									3.97608e-07	1	1.84445e-05	9					2.76823e-06
arcog	arCOG02492						2.5261e-06	1													5.95252e-06	4	2.42713e-06	1							0.000134661	23									8.2663e-06	5	3.17813e-06	1					1.70123e-06
arcog	arCOG02572						1.99785e-06	1													0.000170631	15	1.68668e-06	1			5.46466e-06	1			6.51236e-06	2							8.07052e-06	3	1.47715e-06	1	2.20016e-06	1
arcog	arCOG02651						7.5871e-06	2													0.000154158	9	5.98357e-06	2			1.07507e-05	3			3.99705e-05	4									1.03636e-05	2	1.12264e-05	3
arcog	arCOG02653						5.13351e-05	12													0.00131013	27	0.00012103	18			0.00013514	21			0.000236153	20									7.58176e-05	16	0.000121982	22					1.1828e-05
arcog	arCOG02658																				1.39571e-05	3																			8.24022e-07	1	2.13898e-06	2
arcog	arCOG02674						1.37547e-05	6													0.000295192	20	1.9295e-05	8			2.6335e-05	10			3.26415e-05	6									1.74492e-05	9	1.25151e-05	5
arcog	arCOG02675						7.54904e-06	3													0.000203378	15	1.13311e-05	4			9.0364e-06	4			4.93375e-05	7									6.99581e-06	4	1.18508e-05	4					1.21159e-06
arcog	arCOG02695						6.78314e-06	2													0.000294446	22	1.0681e-05	3			1.06813e-05	5			2.58766e-05	4									4.59882e-06	2	3.24403e-05	4					2.31242e-06
arcog	arCOG02741						1.16228e-06	1													0.000119439	20	5.94816e-06	3			5.81258e-06	4															3.07388e-06	2					4.42295e-06
arcog	arCOG02849																				1.50084e-05	7									1.2429e-06	1											7.83445e-07	1
arcog	arCOG02860						7.92029e-07	1													7.9469e-05	6	5.5714e-06	2			1.0833e-05	4			9.62116e-06	2									4.92002e-06	2	1.03055e-05	3					2.17681e-06
arcog	arCOG03004																				5.14095e-05	5									3.43351e-06	2							1.26469e-06	1			1.5321e-06	1
arcog	arCOG03022																				3.7843e-06	4	5.62735e-07	1			1.66314e-06	2											3.65334e-06	2
arcog	arCOG03060						1.86667e-06	1													6.64565e-06	4	1.71128e-05	4			2.39362e-06	2			3.21399e-05	9							2.68714e-06	1	2.32217e-06	1	1.56033e-05	6
arcog	arCOG03061						4.2852e-06	3													0.000149215	16	7.35998e-06	4			6.62578e-06	4			3.15029e-05	8									2.53597e-06	2	1.18427e-05	6
arcog	arCOG03196						0.000131646	10					9.37934e-06	4							0.00100231	16	0.000135619	11			0.00014005	13			0.000141397	10									0.000134479	15	0.000148551	15					3.41131e-05
arcog	arCOG03221						1.13591e-05	4													0.000328584	11	3.16365e-05	5			2.24468e-05	6			5.24678e-05	5									1.13781e-05	4	3.591e-05	6					2.58167e-06
arcog	arCOG03222
arcog	arCOG03330		4.26593e-06	2											2.18431e-05	6	9.46037e-05	12	2.76128e-05	8	0.00179871	64	0.000164941	17			0.000242878	28			0.000351709	27					6.40962e-06	4	0.000158662	20	0	0	0.000275463	17	0.00069258	31			2.21634e-06
arcog	arCOG03454																														1.44459e-06	1
arcog	arCOG04045																				1.32596e-05	7	5.2046e-06	1			5.23296e-06	1			2.69635e-06	1
arcog	arCOG04067						7.58125e-06	3													0.000142049	10	8.55504e-06	3			1.29227e-05	4			2.48136e-05	4							9.95947e-06	2	8.00051e-07	1	9.79803e-06	3
arcog	arCOG04070						1.28592e-05	5					7.56315e-07	1							0.000226537	23	1.70645e-05	5			2.27106e-05	10			4.24814e-05	9							5.34455e-06	3	7.91374e-06	5	1.81002e-05	6					1.18966e-06
arcog	arCOG04071						4.28831e-06	3													0.000190899	21	5.16206e-06	2			1.5484e-05	8			3.05634e-05	8									2.03709e-06	2	9.77048e-06	6
arcog	arCOG04075						7.64982e-06	4													9.85199e-05	15	4.34611e-06	3			7.25934e-06	4			4.69751e-06	2									1.39625e-06	1	5.69788e-06	3					1.20238e-06
arcog	arCOG04086						7.26994e-06	3													0.00012894	13	1.1029e-05	3			1.98019e-05	8			1.3544e-05	3							0	0	4.29277e-06	3	1.27153e-05	4					2.49908e-06
arcog	arCOG04087						4.17952e-06	2													0.000107771	12	5.31667e-06	2			6.51002e-06	3			9.89915e-06	2							3.56408e-06	2	1.74778e-06	1	6.73309e-06	2
arcog	arCOG04088						0	0													6.32873e-05	11	1.97587e-06	1			3.25531e-06	2			7.27585e-06	2									1.47425e-06	1	2.45051e-06	1
arcog	arCOG04089						1.86082e-06	1													5.51361e-05	5	2.43181e-06	1			4.2853e-06	2			3.05263e-06	1									0	0	2.22086e-06	1
arcog	arCOG04090						4.0729e-06	2													0.000109503	13	6.03833e-06	3			7.01556e-06	4			2.86593e-05	7							5.9221e-06	2	2.03781e-06	2	9.77795e-06	4					5.87031e-07
arcog	arCOG04091						6.67178e-06	3													0.000108721	11	1.34549e-05	5			1.36426e-05	5			8.29109e-06	2							1.52696e-06	1	3.21137e-06	2	1.25669e-05	4					1.39524e-06
arcog	arCOG04092						0	0													0.000108209	13	2.96191e-06	1			5.58425e-06	2			2.07758e-05	3							4.80856e-06	1	1.22492e-06	1	0	0					6.81547e-07
arcog	arCOG04093						3.76278e-06	2													8.89143e-05	11	1.18769e-05	4			1.26176e-05	6			1.62016e-05	4							1.31764e-05	5	1.97706e-06	1	4.7415e-06	2					1.19446e-06
arcog	arCOG04094																				5.79881e-05	7	1.49479e-06	1			8.02816e-07	1			7.72236e-06	2																	5.33865e-07
arcog	arCOG04095						2.5699e-06	3													9.9157e-05	10	3.92858e-06	3			3.83984e-06	3			8.29662e-06	4							5.60004e-07	1	8.82431e-07	1	5.17834e-06	4
arcog	arCOG04096						1.72064e-06	1													3.0423e-05	3					3.44603e-06	2			3.06757e-06	1									1.32985e-06	1	3.20769e-06	1
arcog	arCOG04097						3.21768e-06	1					0	0							5.94203e-05	8	5.06779e-06	2			3.20553e-06	2			1.19276e-05	2									1.66252e-06	1	4.31359e-06	2	0	0
arcog	arCOG04098						7.91118e-06	3													6.78451e-05	8	9.91176e-06	4			9.27322e-06	5			1.02549e-05	4									3.27946e-06	3	9.63495e-06	4					7.60982e-07
arcog	arCOG04099						3.44129e-06	2													6.11577e-05	5	1.58518e-06	1			2.37687e-06	1			1.89533e-06	1							1.53861e-06	1	3.13993e-07	1	3.37547e-06	2
arcog	arCOG04101						1.37922e-06	1													5.40591e-05	7	3.40054e-06	2			8.85808e-07	1			1.98469e-06	1											3.13095e-06	2					4.09147e-07
arcog	arCOG04109						2.70278e-06	1													2.25036e-05	1	2.92568e-06	1			2.06776e-06	1			5.82654e-06	1											3.5216e-06	1
arcog	arCOG04113						2.04435e-06	1													0.000100085	8	1.11216e-05	4			4.98221e-06	2			5.21191e-06	2									2.10389e-06	2	7.78852e-06	3
arcog	arCOG04128																				6.43015e-06	4									4.06819e-06	2							0	0
arcog	arCOG04129																				3.6063e-05	4					0	0											2.69853e-06	1	2.09037e-06	1	1.04412e-06	1
arcog	arCOG04137																				4.12115e-05	10					7.65356e-07	1			5.46586e-06	2									0	0	1.96772e-06	1
arcog	arCOG04154						4.15509e-06	2													3.46862e-05	3	2.93288e-06	2			2.67653e-06	2			3.2438e-06	2							2.02264e-06	1	1.22056e-06	1	6.6261e-06	2
arcog	arCOG04168						2.56844e-06	1													4.12499e-05	2					4.73456e-06	1															0	0
arcog	arCOG04172																				6.46459e-05	10	2.95013e-06	3			4.00178e-06	3			1.62428e-05	4									2.26911e-06	2	7.82468e-06	3
arcog	arCOG04175						3.48684e-06	1													6.70133e-05	4	7.45093e-06	3			6.51159e-06	2			1.14146e-05	3									2.78375e-06	1	1.04659e-05	3					1.52116e-06
arcog	arCOG04180						1.87663e-05	6					6.78581e-07	1							0.000323756	35	2.78675e-05	10			4.66669e-05	20			6.65638e-05	12							6.20524e-06	4	1.56849e-05	9	4.10492e-05	13					7.30439e-06
arcog	arCOG04182						3.59014e-06	2													0.00010079	8	9.94985e-06	4			1.05534e-05	4			3.75021e-06	1									2.1975e-06	1	5.52196e-06	2
arcog	arCOG04185						1.32528e-06	1													8.2505e-05	10	6.95418e-06	3			9.17173e-06	5			5.92063e-06	2							0	0	1.1688e-06	1	1.49414e-05	4					1.14576e-06
arcog	arCOG04186						1.1246e-06	1													0.000121588	13	5.07018e-06	2			8.11494e-06	4			1.61154e-05	4									0	0	4.30626e-06	2
arcog	arCOG04187																				2.0679e-05	6	6.22532e-07	1			6.18557e-07	1			1.07011e-06	1											7.48366e-07	1
arcog	arCOG04209																				1.93336e-05	3					0	0			3.8606e-06	1
arcog	arCOG04213												8.73716e-07	1							3.73841e-05	9					1.67618e-06	2			6.60386e-06	3							7.52993e-07	1			1.92413e-06	2
arcog	arCOG04236																				4.48346e-05	10	1.54545e-06	1							3.81897e-06	1									0	0	1.55816e-06	1
arcog	arCOG04239						6.65992e-06	3													7.58287e-05	10	9.60921e-06	4			6.79206e-06	4			1.24876e-05	4									1.96672e-06	1	6.39614e-06	1					1.31456e-06
arcog	arCOG04240						2.42202e-06	1													8.20792e-05	10	2.74543e-06	1			3.73292e-06	2			1.50215e-05	4							2.85655e-06	1	1.37997e-06	1	6.75582e-06	2
arcog	arCOG04241						6.96603e-07	1													2.64546e-05	5					8.21225e-07	1			4.10801e-06	2											4.45169e-06	3
arcog	arCOG04243						4.92311e-06	2													7.24501e-05	7	4.61121e-06	2			7.02398e-06	4			4.03977e-06	1									0	0	7.54333e-06	2					1.42874e-06
arcog	arCOG04245						1.65635e-06	1													9.5373e-05	11	7.45915e-06	3			3.21032e-06	2			1.02939e-05	3							3.92748e-06	2	1.47048e-06	1	7.5042e-06	2
arcog	arCOG04254																				8.48481e-05	12	6.68865e-06	4			1.67848e-06	2			5.80113e-06	3									0	0	4.32287e-06	3
arcog	arCOG04255						5.37345e-06	2													8.94953e-05	5	7.111e-06	2			7.21529e-06	2			2.29128e-05	3							2.84642e-06	1	3.77817e-06	2	6.89484e-06	2					1.25354e-06
arcog	arCOG04256																				3.94209e-05	9									3.7216e-06	2											9.89431e-07	1
arcog	arCOG04260																				6.20967e-06	2	5.06574e-07	1							1.38335e-06	1									6.67465e-07	1
arcog	arCOG04277						2.30043e-06	1													0.000113992	7	1.69022e-05	2			8.38858e-06	2			1.24454e-05	2									3.24885e-06	1	1.0593e-05	2
arcog	arCOG04287																				3.0309e-05	2																			1.25319e-06	1
arcog	arCOG04288						9.40551e-07	1													6.79547e-05	10	2.06844e-06	2			5.65411e-06	4			1.59203e-06	1							2.25505e-06	1			2.87647e-06	2
arcog	arCOG04289						3.61951e-06	1													0.000100929	13	7.44325e-06	2			1.22851e-05	3			6.62253e-06	1							3.50593e-06	1	2.7336e-06	1	4.99989e-06	1					1.18703e-06
arcog	arCOG04300																				8.54031e-06	4									1.54642e-06	1
arcog	arCOG04301																				2.73898e-05	7									2.07643e-06	2
arcog	arCOG04302						5.67514e-07	1													1.44733e-05	4					3.81977e-06	1			8.13445e-07	1
arcog	arCOG04308																				9.63616e-06	4																			1.12036e-06	2	7.22947e-06	4
arcog	arCOG04313						6.10456e-06	2													0.000116278	10	6.25541e-06	2			8.75471e-06	4			7.78533e-06	2			3.69227e-07	1			9.84198e-06	4	1.84477e-06	2	9.66801e-06	4					2.55676e-07
arcog	arCOG04314						1.72915e-06	2													6.04933e-06	4																					1.34266e-05	3
arcog	arCOG04320																				6.3386e-05	8	1.78325e-06	2			1.32709e-06	2															2.6117e-06	2
arcog	arCOG04336						4.60938e-05	9													0.00046081	13	6.60761e-05	10			3.25378e-05	6			0.000151096	10									3.5364e-05	7	7.08925e-05	11	3.32967e-06	2			1.09488e-05
arcog	arCOG04343																				3.45475e-05	5					1.9194e-06	2			8.95884e-06	3									5.02607e-07	1			6.82258e-07	1
arcog	arCOG04346																				0.000159854	15	1.66811e-06	2			0	0			2.0465e-05	6									1.45913e-06	2	4.25733e-06	3
arcog	arCOG04352						0	0													7.7113e-07	1	2.74014e-06	1			6.33114e-06	1			7.67228e-06	1									5.87481e-06	1	7.17493e-06	1					3.06649e-06
arcog	arCOG04372						3.3609e-06	1													5.26058e-05	4	4.24338e-06	2			3.58294e-06	1			6.78267e-06	1											5.70462e-06	1
arcog	arCOG04382						8.86788e-05	9					1.21615e-05	4							0.000895411	19	8.22919e-05	10			0.000112461	13			0.000207171	10									8.21316e-05	11	0.000186883	13	1.12526e-06	1			3.73849e-05
arcog	arCOG04387						9.41758e-07	1													4.7361e-05	15	4.81092e-07	1			8.31094e-07	2			2.05142e-06	1											1.58441e-06	2
arcog	arCOG04415																				3.92576e-05	8	1.92256e-06	2			1.35128e-06	2			2.8346e-06	2									0	0	3.47891e-06	3
arcog	arCOG04421																				3.07086e-05	9
arcog	arCOG04432																				3.5722e-05	7					1.07176e-06	1													1.0466e-06	1	1.72069e-06	1
arcog	arCOG04444						0	0													1.90007e-05	5									2.56648e-06	1									0	0
arcog	arCOG04461						3.77005e-05	9													0.000755398	27	6.16391e-05	12			6.05678e-05	12			0.000195087	17									3.77311e-05	10	6.00764e-05	11	1.75863e-06	2			8.43118e-06
arcog	arCOG04462						6.47881e-07	1													2.90244e-05	5									1.2181e-06	1							5.41928e-07	1	0	0	2.82089e-06	2
arcog	arCOG04465						1.85035e-05	8													0.000206783	27	1.37299e-05	6			3.18564e-05	11			3.4999e-05	10							1.63707e-05	5	1.71629e-06	2	1.4667e-05	7
arcog	arCOG04473						1.44408e-06	1													4.27775e-05	5	0	0			1.75063e-06	1			0	0									0	0	4.9963e-06	1
arcog	arCOG04694																				1.04817e-06	1
arcog	arCOG04767						6.33205e-06	2													7.11984e-05	4	1.00617e-05	2			1.00455e-05	1													0	0	3.01441e-06	1
arcog	arCOG04857						0.000246482	17					6.04025e-05	9							0.00277072	52	0.000298165	19			0.000583013	43			0.000721276	25							0.000277056	18	0.000216501	18	0.00045995	20	2.79257e-05	7			0.000100494
arcog	arCOG04858						0.000189976	13					6.38839e-05	15							0.00225044	42	0.000217578	14			0.00041463	32			0.000486662	28							0.000165022	17	0.000262605	16	0.000417952	19	2.79542e-05	8			7.01614e-05
arcog	arCOG04860						0.000258875	17					5.41749e-05	10							0.00246255	45	0.000309423	16			0.00049698	38			0.00112457	35							0.000153695	15	3.01591e-05	2	0.000486665	23	1.88559e-05	6			0.000114591
arcog	arCOG04861																				6.37455e-05	16									3.52406e-06	2											1.33758e-06	1
arcog	arCOG04866																				6.26272e-05	15					6.13624e-07	1			2.70977e-06	1											0	0
arcog	arCOG04873						5.05471e-07	1													3.67302e-06	1					3.95823e-07	1			6.2888e-07	1											4.04959e-07	1
arcog	arCOG04874																				3.27013e-05	7									4.21452e-06	4									5.78302e-07	1	1.35901e-07	1
arcog	arCOG04896																				9.44893e-06	5																					8.77029e-07	1
arcog	arCOG04905						1.03714e-06	1													1.81946e-05	5	9.9785e-07	1			7.85325e-07	1													6.0512e-07	1	1.54131e-06	1
arcog	arCOG04972												3.37435e-06	1							1.83022e-05	5	8.15677e-07	1			5.46447e-07	1			1.37554e-06	1											2.74023e-06	1
arcog	arCOG05093		2.07092e-05	6	1.71235e-05	6			1.79804e-05	4	9.53491e-06	4	4.29508e-05	12	6.92628e-05	7	6.20347e-06	3	1.50644e-05	8	2.00878e-05	7	1.53839e-05	5	2.03272e-05	8	3.8897e-05	6	4.15932e-05	9	0	0	6.01973e-06	4	2.95675e-05	9	7.03372e-06	5	5.81085e-05	13	3.23293e-06	3	0.000117582	19	1.23526e-05	3	3.13665e-05	8
arcog	arCOG05143		1.1001e-06	1	9.18413e-06	4	1.5749e-05	8	4.0747e-05	9			7.99067e-06	3	8.05698e-07	1													2.75819e-06	2													2.23107e-06	2	3.84454e-06	3			1.63375e-05
arcog	arCOG05185		1.11726e-06	1	0	0					3.6999e-07	1	1.74901e-06	2					2.72149e-06	3			8.21968e-07	1	7.38695e-06	3	7.13474e-06	4	2.11804e-06	2			7.18424e-06	2	1.99837e-06	1	3.81338e-07	1					1.73246e-06	1			5.31947e-07	1
arcog	arCOG05881		3.4923e-07	1	1.24196e-05	5	2.5246e-06	2	4.32875e-06	2	1.24148e-06	1	6.57967e-06	4	1.23238e-05	5	3.67714e-06	1	8.84582e-06	3	1.67586e-05	5	6.41374e-06	6	2.71801e-06	2	7.92068e-06	5	6.30824e-06	5	3.73277e-06	2	4.51458e-06	3			4.20057e-06	3	9.47688e-06	5	8.51156e-06	5	3.69286e-06	2	1.17753e-05	8	9.19932e-06	6	1.42172e-05
arcog	arCOG06053																												1.16836e-06	1
arcog	arCOG06245																								0.000163783	10
arcog	arCOG06458
arcog	arCOG06631								2.32056e-06	1																					3.2805e-06	1
arcog	arCOG06857
arcog	arCOG07336		2.57228e-05	7	2.8054e-05	8	5.07016e-06	2	2.56649e-05	6	2.27019e-05	9	2.27828e-05	7	4.66497e-06	3	1.39394e-05	5	2.35888e-05	9	2.47238e-05	6	1.02925e-05	4	1.83117e-05	5	6.18063e-05	10	2.36421e-05	7			7.15775e-06	3	1.08608e-05	6	6.77944e-06	4	2.94341e-05	8	1.46092e-05	6	8.72807e-06	3	9.66307e-06	6	4.51717e-06	3	1.2327e-05
arcog	arCOG07672												1.21903e-06	1													3.73143e-07	1							3.43149e-07	1											1.69626e-06	1	3.44455e-07
arcog	arCOG07796		2.50123e-05	4	3.59843e-05	5	1.80887e-05	4	0.000128258	5	5.18357e-05	5	0.000101381	6	5.43542e-05	5	1.4696e-06	1	7.75301e-06	3	0.000136988	6	6.30764e-06	3	1.71264e-05	4			2.74437e-05	5	0	0	1.08478e-05	3	2.99584e-06	2	5.05099e-05	5	5.17359e-05	5	5.12941e-06	2	1.21586e-05	3	7.58558e-05	5	3.28293e-05	4	2.31679e-05
arcog	arCOG07805																				8.7013e-05	14					8.04516e-07	1			6.52085e-06	2							3.57791e-06	2	1.27172e-06	1	1.05921e-06	1
arcog	arCOG08054				0	0	9.0374e-07	1							4.84688e-06	3																							1.99349e-06	1					1.66747e-06	1			3.42978e-05
arcog	arCOG10218		2.25654e-06	1	1.93576e-06	2	9.76485e-06	3	3.26375e-05	9	1.54833e-06	1	1.86001e-06	1			1.87743e-05	4	1.72441e-05	3	4.29136e-05	7	4.88662e-05	9			2.52429e-06	3	3.76246e-06	3	2.00326e-05	6	4.77341e-05	8	8.49688e-06	5			1.08366e-05	6	7.64733e-06	5	2.64776e-05	6	7.36919e-06	2	5.1508e-06	2	4.9767e-06
arcog	arCOG10654		2.67784e-06	1	3.9124e-06	3	2.93314e-06	2	1.81742e-06	1			2.82295e-06	1	9.57976e-07	1	4.78625e-06	1	4.185e-06	1	6.15396e-06	2	6.31e-06	5	1.33768e-06	1	5.12248e-07	1	5.23576e-06	3			2.53149e-06	2	6.77361e-06	4	6.29583e-06	3	8.09641e-07	1	9.61982e-06	3	4.80105e-06	2	1.52226e-06	2	2.45938e-06	3	9.55422e-06
arcog	arCOG11376						1.3593e-06	1					7.94383e-07	1							4.27434e-05	5					1.57193e-05	4															1.81857e-05	3					9.99119e-07
arcog	arCOG12551
arcog	arCOG12623																				5.66999e-06	2
arcog	arCOG12631		3.26802e-05	6	1.24099e-05	5	2.16197e-05	9	8.30761e-06	3	2.51303e-05	10	9.18227e-06	3	3.0282e-05	10	2.81646e-05	4	3.29177e-05	6	2.01381e-05	7	1.92721e-05	8	1.36612e-05	5	1.88792e-05	8	3.9709e-05	12	3.39499e-05	11	2.29636e-05	5	9.68874e-06	5	2.5053e-05	11	8.01117e-05	19	2.9574e-05	11	2.79358e-05	9	1.59054e-05	6	1.47376e-05	7	1.86405e-05
arcog	arCOG12634																				6.81123e-05	4					6.08684e-07	1			4.51971e-06	1									5.70128e-06	2	0	0
arcog	arCOG12654								2.08721e-06	1					3.01627e-06	2	5.36115e-06	3			2.69328e-06	2							1.8882e-06	2	5.80717e-06	3	5.77071e-07	1	2.22311e-07	1			6.10147e-06	3	4.32652e-06	5	1.63971e-06	2	2.82389e-06	2
arcog	unannotated		0.999735	116756	0.999815	151695	0.997223	120355	0.999569	100354	0.999878	118241	0.999346	132361	0.999788	133050	0.99975	114548	0.999857	105762	0.944675	98541	0.995595	126473	0.99974	96782	0.993697	145614	0.999824	118266	0.987927	91284	0.999824	139973	0.999875	158221	0.999868	136759	0.997864	128822	0.997345	136131	0.99362	133235	0.999002	117348	0.999823	139235	0.998847
cazy	CBM1	carbohydrate-binding module family 1			0	0	2.42316e-06	2									1.76814e-06	2					4.83006e-06	3			1.02394e-05	8									7.44206e-07	1					4.64912e-06	3			1.53104e-05	8
cazy	CBM48	carbohydrate-binding module family 48	0.000801087	213	0.000979688	283	0.000454926	139	0.00094207	138	0.000691662	201	0.00170808	218	0.000938821	225	0.00114288	220	0.000547541	128	0.000588724	95	0.000633604	196	0.000352274	111	0.000849882	277	0.00103494	238	0.00217436	172	0.000799068	245	0.00106287	340	0.00126216	276	0.000561492	159	0.000930043	249	0.000651817	188	0.00122677	216	0.000844921	227	0.00107863
cazy	CBM50	carbohydrate-binding module family 50	0.000148228	47	4.0433e-05	22	2.4326e-05	17	1.46621e-05	2	5.36241e-06	4	3.3687e-05	12	3.07855e-05	15	0.000121138	33	1.75534e-05	8	2.5712e-05	13	4.86775e-05	24	4.23443e-05	21	0.000121752	44	4.45707e-05	25	1.69471e-05	3	0.000122221	56	0.000131706	59	1.84318e-05	9	1.13773e-05	10	1.12801e-05	7	3.49262e-05	22	8.52143e-05	22	2.57287e-05	17
cazy	CBM6	carbohydrate-binding module family 6	1.56672e-05	5	0.000503542	127			1.17966e-06	1	5.96789e-05	20	1.08194e-06	1	1.64003e-05	13	5.46833e-05	13	6.1044e-05	16	1.88673e-05	5	3.40637e-06	2	3.50733e-06	3	0.000318848	76	2.44578e-05	12	1.09879e-06	1	1.54482e-05	7	0.000109153	27	1.37209e-05	6			3.13119e-06	2	1.49783e-05	7	3.28155e-05	11	2.79404e-06	3	4.45897e-07
cazy	CE1	carbohydrate esterase family 1	5.68418e-05	20	5.29579e-05	31	6.25867e-05	17	1.85983e-05	9	7.10454e-05	32	2.14759e-05	17	0.000103703	34	4.57698e-05	20	4.68215e-05	18	3.79451e-05	25	0.000132479	47	9.82585e-06	5	7.31242e-05	25	0.000147235	36	6.01359e-05	15	2.09558e-05	17	3.6695e-05	23	1.02906e-05	9	9.64549e-05	42	2.59522e-05	15	6.49719e-05	24	1.44297e-05	11	2.89458e-05	19	1.20186e-05
cazy	CE10		0.00041574	80	0.000460866	114	0.000259631	50	3.53708e-05	16	0.000285182	84	6.85816e-05	36	0.000168676	44	0.000101301	50	0.000250774	48	8.65673e-05	36	0.000128533	57	5.77006e-05	27	0.000223734	94	0.000226787	73	0.000124813	38	8.17435e-05	40	0.000179005	77	0.000169015	59	0.000185952	70	0.000154888	67	5.69783e-05	27	0.000119374	47	0.000138589	47	0.000191477
cazy	CE15	carbohydrate esterase family 15									4.19706e-07	1											8.90953e-07	1					5.72267e-07	1			4.25716e-07	1	5.74228e-07	1	6.16537e-07	1							5.57299e-07	1			4.23643e-07
cazy	GH1	glycoside hydrolase family 1	2.83109e-05	13	4.58863e-05	21	1.84584e-05	5	1.97898e-05	5	0.000124254	15	1.57004e-05	2	5.82101e-05	23	2.58808e-05	11	3.76442e-05	10	9.78824e-06	4	5.62225e-05	13	8.75145e-06	5	9.2053e-06	8	2.03776e-05	10	3.17012e-06	2	2.37202e-05	11	6.14855e-05	23	4.2315e-05	18	2.77114e-06	3	3.30466e-05	18	7.25344e-06	6	3.91738e-05	13	0.000137029	16	2.92192e-05
cazy	GH101	glycoside hydrolase family 101	0.00020851	50	0.000102913	46			0.000565586	68	0.000640045	98	0.0001399	67	0.000157569	42	4.57256e-05	19	0.000487599	77	0.000564004	48			0.000305953	56	2.86313e-06	2	0.000387996	89	4.66439e-06	1	0.000383083	72	0.00040192	95	0.000196192	60	8.80332e-05	25	5.12115e-05	22	0.000264242	42	0.000170387	62	0.000219364	56	4.81898e-05
cazy	GH105	glycoside hydrolase family 105	0.000136129	46	0.000247573	88	0.000111744	35	3.05613e-05	13	7.04993e-05	36	0.000272702	75	0.00034985	70	0.00013994	42	0.000221251	58	3.54413e-05	20	0.000186752	66	0.000158132	52	0.000261098	88	0.000268611	69	1.35995e-05	5	0.000187253	67	0.000225054	85	7.30603e-05	39	0.00017273	54	7.20367e-05	20	0.000128322	48	0.000200169	52	0.000149894	64	1.93404e-05
cazy	GH121	glycoside hydrolase family 121	2.72722e-05	18	1.98165e-05	26	9.51224e-05	32	0.000102125	34	4.07063e-05	23	5.13682e-05	28	0.000109664	38	1.5468e-05	10	3.83302e-05	23	0.000577386	122	0.000482783	140	7.34798e-05	29	4.14415e-05	29	2.16443e-05	19	0.000880865	103	8.61084e-05	40	0.000113355	49	3.29391e-05	20	5.55536e-05	31	0.000160731	86	6.05533e-05	31	4.20373e-05	20	0.000276697	114	6.77757e-05
cazy	GH13	glycoside hydrolase family 13	0.00720851	643	0.00402837	838	0.00211982	477	0.00582955	534	0.00273616	606	0.0043526	647	0.00285072	614	0.0039888	637	0.00249265	477	0.00414194	353	0.00301423	608	0.00420077	339	0.0028088	717	0.00492635	731	0.00461662	425	0.00414803	767	0.00450015	1043	0.00723723	1058	0.00179976	382	0.00304189	682	0.00548159	709	0.00766065	735	0.00910702	769	0.00446402
cazy	GH16	glycoside hydrolase family 16	8.4345e-05	28	4.76805e-05	29	6.53087e-05	26	0.000327604	55	0.000258879	63	5.61339e-05	31	1.30408e-05	13	0.000197356	55	0.000187936	38	0.000258803	56	0.000412125	105	0.000117747	29	0.000177138	40	5.17923e-05	28	0.000153744	40	0.000225207	57	7.83113e-05	36	0.00011506	57	0.000155152	43	7.68745e-05	25	0.000374754	57	0.000119507	37	5.85794e-05	32	2.82961e-05
cazy	GH18	glycoside hydrolase family 18	2.89112e-05	8	1.68113e-05	8			2.80356e-06	1	1.29919e-05	5	3.56369e-05	8	1.86947e-05	6	3.59482e-05	9	2.14188e-05	5	1.7914e-05	7	1.09529e-05	6	8.77559e-06	3	1.69992e-05	6	9.73134e-05	15	0.000100219	12	4.12967e-06	4	1.75517e-05	10	4.09062e-05	15	9.86763e-06	6	3.26931e-05	12	2.03967e-05	5	5.47225e-06	4	7.8052e-06	4	5.00579e-06
cazy	GH19	glycoside hydrolase family 19					7.02436e-07	1							0.000111285	5									4.67165e-05	3					0.000227418	4
cazy	GH2	glycoside hydrolase family 2	0.00165771	413	0.00146582	530	0.00135289	363	0.00124015	287	0.00178121	411	0.00183393	508	0.00227814	553	0.00166033	294	0.0017131	420	0.00180168	386	0.00129834	432	0.000958508	258	0.000840644	369	0.0018585	366	0.00101775	175	0.000994511	386	0.00206291	667	0.00113556	416	0.00104363	346	0.00189545	530	0.00129486	437	0.000839959	288	0.00266733	677	0.00375049
cazy	GH20	glycoside hydrolase family 20	0.000290826	81	0.000559456	176	0.000522341	124	0.000191138	61	0.00029774	108	0.000222203	100	0.000645383	190	0.000150175	67	0.000189415	77	0.000432455	130	0.000226761	86	0.000136072	56	0.000252189	111	0.000294492	126	0.000573031	108	0.000123212	63	0.000528623	194	0.000246735	105	0.000113066	67	0.000248711	128	0.000111422	60	0.000111485	55	0.000505901	140	0.000470437
cazy	GH23	glycoside hydrolase family 23											2.85675e-07	1																							8.77427e-06	1					3.18321e-07	1	3.07044e-06	1
cazy	GH24	glycoside hydrolase family 24			6.25092e-07	1	6.34131e-06	5	8.58477e-05	4			5.70798e-07	1			1.04246e-06	1	1.96414e-06	2	2.86731e-06	2	9.89212e-06	1			4.45067e-06	3			0	0	7.4301e-07	1			4.07068e-07	1					3.78049e-06	3	1.69282e-06	2	1.80861e-06	1
cazy	GH25	glycoside hydrolase family 25	6.30255e-06	3	2.14954e-05	11	3.60707e-05	9	1.55025e-05	6	3.20827e-05	19	3.4068e-06	2	1.1461e-05	6	4.23841e-05	19	2.14992e-05	11	8.29094e-07	1	6.04926e-05	18			2.03568e-05	8	0.000105536	6	2.53549e-06	2	7.19955e-05	31	2.28453e-05	23	0.000146622	30	2.41361e-05	11	5.48983e-05	6	1.80302e-05	5	0.000102389	35	2.77414e-05	8	5.1204e-06
cazy	GH26	glycoside hydrolase family 26	3.50698e-05	10	1.75242e-05	11	3.16769e-05	19	0.000114314	26	3.543e-05	18	9.17842e-05	35	8.6321e-05	30	0.000199346	56	2.82737e-05	15	2.25426e-05	11	0.000599418	97	2.27325e-06	2	3.91579e-05	17	0.000111513	32	0	0	1.40508e-05	10	0.00037397	65	0.00013361	52	2.18886e-05	13	2.13706e-05	8	2.16016e-05	12	8.43284e-05	26	7.45781e-05	27	8.38502e-05
cazy	GH28	glycoside hydrolase family 28	2.17601e-05	11	0.000133341	51	0.000104712	36	2.57871e-05	11	0.000158393	34	8.72539e-05	34	0.000120714	40	2.23503e-05	15	0.000392468	81	2.59801e-05	13	5.75047e-05	31	4.81335e-05	23	0.000274954	86	0.00012039	35	0.000149577	32	2.93275e-05	19	0.000167173	54	3.81025e-05	22	0.000130386	38	2.22114e-05	15	5.91851e-05	19	0.000122553	40	4.64776e-05	30	2.48846e-05
cazy	GH29	glycoside hydrolase family 29	0.000337277	111	0.000210194	90	0.000289671	73	0.000245218	56	0.00056508	112	0.000135295	59	0.000320803	108	0.000123251	52	0.000443641	116	0.000195274	61	0.000137356	56	0.000239283	81	0.0001967	84	0.000464502	133	0.000433378	65	0.000228971	92	0.000346636	149	0.000142346	76	0.000117758	55	0.000204416	87	0.000117161	62	0.000189351	68	0.000306065	90	0.000195376
cazy	GH3	glycoside hydrolase family 3	0.00319502	584	0.00273055	700	0.00106655	348	0.00175168	270	0.0020768	496	0.00129223	377	0.00172048	441	0.00282842	673	0.0021718	446	0.00131832	286	0.00286185	612	0.000877098	284	0.00137362	541	0.00172551	427	0.00249837	388	0.00220977	529	0.00206415	744	0.00117545	430	0.00188762	463	0.00256465	627	0.00163365	419	0.00131009	390	0.00130091	429	0.00133144
cazy	GH30	glycoside hydrolase family 30	4.5306e-05	12	1.66415e-05	6	1.64264e-06	1			8.46917e-06	6	6.2589e-07	1	1.22093e-05	8	3.06969e-05	10	4.86981e-06	4	7.63384e-06	4	2.36225e-06	2	4.14974e-06	2	1.72404e-05	7	1.14425e-05	7	2.53666e-06	2	1.011e-05	7	2.81655e-06	4	3.06864e-06	4	1.92459e-05	14	3.05019e-06	3	2.2586e-06	2	8.69782e-06	7	6.40196e-06	4	1.40046e-05
cazy	GH31	glycoside hydrolase family 31	0.0026769	368	0.00358791	525	0.00124333	235	0.00424128	228	0.00232638	292	0.00247358	339	0.00258041	278	0.000617382	220	0.00138962	290	0.00483206	303	0.00403621	401	0.0025735	294	0.000832677	247	0.00320455	316	0.000356534	112	0.00322457	336	0.00322251	567	0.00339445	381	0.00222631	248	0.00304999	370	0.00354719	313	0.0022421	261	0.0029523	445	0.000964265
cazy	GH32	glycoside hydrolase family 32	0.000399742	74	0.00030844	105	0.000336546	74	0.000423097	57	0.000570156	111	0.000409683	79	0.000120321	45	0.000361683	61	0.000465899	70	0.000478161	67	0.000315991	88	0.000316785	75	0.000267226	62	0.000572988	109	0.000332355	52	0.000430785	108	0.000263002	93	0.000366659	95	0.000280605	53	0.000274995	89	0.00035356	77	0.000924023	100	0.000833076	124	0.000541763
cazy	GH33	glycoside hydrolase family 33	0.000278157	82	0.00030667	75	0.000117252	52	0.000253667	73	0.000330994	52	0.000324993	57	0.000510017	122	0.000126425	50	0.000305096	59	0.000295208	77	0.0001438	38	0.000107107	29	6.45424e-05	21	0.000351935	69	0.000124156	37	8.92395e-05	44	7.63045e-05	36	0.000131494	53	0.000144866	62	0.000113385	49	0.0001225	37	7.37817e-05	32	0.000353804	85	7.22747e-05
cazy	GH35	glycoside hydrolase family 35	2.08071e-06	2	5.49162e-06	5	1.86603e-05	6	2.54066e-06	2	7.89064e-07	1	1.68136e-05	7	4.03874e-05	16	2.00245e-06	2	6.61191e-06	4	6.89019e-06	4			3.79991e-07	1	4.92494e-06	4	8.38687e-06	6	8.14767e-06	3	6.97428e-07	1	9.09591e-06	8			3.80198e-06	4					1.06063e-06	1	8.64288e-06	7
cazy	GH38	glycoside hydrolase family 38	0.000393719	61	0.000391809	121	2.76958e-05	11	0.000288312	77	0.000226644	79	8.2284e-05	24	0.000157242	48	0.000134782	40	0.000450593	82	0.00111426	115	7.74905e-05	38	4.00176e-05	20	0.000232788	82	8.80252e-05	38	0.000100281	33	0.000272955	70	0.000262772	94	0.000211886	76	0.000158942	65	0.000206366	83	0.000306602	91	4.1923e-05	24	0.000151355	55	0.0002526
cazy	GH39	glycoside hydrolase family 39	7.95221e-05	29	8.53626e-05	30	5.97129e-05	34	6.68269e-05	23	0.000124757	21	4.85771e-05	16	3.18705e-05	12	0.000200815	50	4.65719e-05	15	0.000234037	64	0.000142835	44	0.000103919	15	6.11098e-05	27	8.33256e-05	15	0.000172606	53	8.28335e-05	32	0.000155254	44	9.25369e-05	27	0.000149764	39	0.00017986	53	0.000249801	35	7.22413e-05	18	8.9014e-05	30	2.64376e-07
cazy	GH4	glycoside hydrolase family 4	0.000131119	40	6.70529e-05	28	6.70976e-05	24	0.000105985	35	0.000214232	45	0.000681171	55	6.19597e-05	24	0.000120662	34	6.98656e-05	28	3.17285e-05	13	6.8918e-05	26	0.000149582	32	0.000217041	68	0.000139735	44	0.000128114	26	0.000179417	39	1.97463e-05	16	0.000100132	39	9.89901e-05	40	0.000136598	54	5.87303e-05	26	0.00018186	45	0.000111804	49	0.000200466
cazy	GH42	glycoside hydrolase family 42	0.000346193	107	0.000208725	97	0.000120172	36	0.000353922	86	0.000265029	90	0.000171539	72	0.000155778	65	9.81716e-05	51	0.000318762	90	0.00078646	166	0.000160301	71	7.1948e-05	38	0.000246176	107	0.000155501	56	7.4138e-05	24	0.000305815	123	0.000202119	121	0.000250828	107	0.000224958	91	0.000213622	91	0.000210882	82	0.000128828	59	0.000122545	63	0.000209258
cazy	GH43	glycoside hydrolase family 43	0.000889542	191	0.00193931	390	0.000243533	74	0.000315348	72	0.000721003	145	0.000708959	164	0.000511355	179	0.000644547	163	0.000633905	184	0.000379315	99	0.000728722	187	0.000607154	203	0.00202038	376	0.000918312	202	0.000341028	36	0.000466652	146	0.00114338	327	0.000916657	171	0.000465725	113	0.00129982	193	0.000495917	115	0.000846925	188	0.000432572	147	0.000636864
cazy	GH5	glycoside hydrolase family 5	2.94887e-05	14	0.000351077	20	0.000264577	48	0.00130914	49	9.70969e-06	7	0.000205086	36	0.00107974	66	0.000705872	49	1.32157e-05	10	8.98016e-05	24	0.000480873	85	2.03975e-05	12	0.000814859	61	0.000198091	38	1.48578e-05	5	0.000162653	43	0.000153252	75	4.97394e-05	25	0.000597446	60	7.56036e-05	30	0.00017946	41	0.00087216	57	5.66818e-05	26	5.25693e-05
cazy	GH51	glycoside hydrolase family 51	0.0011337	225	0.00229882	342	0.00114402	141	0.000874022	133	0.000660339	182	0.00100998	185	0.00118449	191	0.00053432	143	0.00135638	226	0.000947508	177	0.000838534	226	0.00101516	215	0.000836766	224	0.000761493	178	0.000461994	79	0.00103276	235	0.00134282	378	0.000731558	166	0.00108655	185	0.00112264	217	0.000695162	176	0.00070463	193	0.000975783	234	0.000666277
cazy	GH57	glycoside hydrolase family 57	0.000252437	31	0.000240825	44	0.000230786	33	4.32626e-05	12	0.00010292	22	0.000294819	42	0.000298509	40	5.87371e-05	10	0.000144351	18	8.17347e-05	24	0.00018665	31	5.27266e-05	15	0.000165343	28	0.000311799	29	6.80532e-05	16	0.000145447	40	0.000242964	39	5.70572e-05	16	0.000272196	53	0.00011167	30	0.000235021	51	0.000229277	32	0.00018652	41	0.000237437
cazy	GH63	glycoside hydrolase family 63	1.82227e-06	2	1.62789e-06	3	3.0833e-06	3			1.29007e-05	4	6.95082e-06	7	1.45611e-05	10	2.15829e-06	2	1.11508e-05	6	3.7451e-06	2	1.44278e-06	2	1.35916e-05	6	8.72254e-06	5	1.39158e-06	2	6.89816e-07	1	2.18274e-05	9	8.16234e-06	5	1.42169e-06	1	3.90851e-06	4	7.94032e-07	2	1.25178e-06	1	3.26487e-06	3	1.32013e-05	8	0
cazy	GH66	glycoside hydrolase family 66	1.04097e-05	4					7.24832e-05	16			3.43129e-05	13	0	0			1.58962e-06	1			1.09835e-06	1	3.26758e-06	3	1.8132e-06	1	0.000152694	41			1.23083e-06	1	5.86361e-07	1	3.49372e-06	4	6.56306e-06	4	6.5558e-06	7	2.39552e-05	12			4.05911e-07	1
cazy	GH73	glycoside hydrolase family 73							8.54694e-07	1	3.40661e-06	3	2.67078e-07	1	2.04363e-06	2	4.50714e-06	4			0	0	2.28188e-06	2	7.73673e-06	4			1.38822e-06	2					1.147e-06	2	2.97334e-07	1					1.22661e-06	1			5.2323e-06	1	8.70797e-07
cazy	GH74	glycoside hydrolase family 74			0	0	2.42316e-06	2									1.76814e-06	2					4.83006e-06	3			1.02394e-05	8									7.44206e-07	1					4.64912e-06	3			1.53104e-05	8
cazy	GH77	glycoside hydrolase family 77	0.000559449	118	0.000604601	172	0.000539581	154	0.000177649	40	0.000495093	150	0.000442288	109	0.000564343	146	0.000684116	153	0.000337257	119	0.000121999	50	0.000443459	133	0.000323472	99	0.000965053	234	0.000568675	126	0.000339437	51	0.000388519	170	0.000526501	203	0.000907152	167	0.000394766	116	0.000677907	171	0.000428579	134	0.000651198	129	0.000479803	151	0.000579717
cazy	GH78	glycoside hydrolase family 78	2.03561e-06	3	2.76577e-05	16	2.94199e-06	4	7.43338e-07	1	4.22381e-06	5	6.55447e-06	5	8.73921e-06	10	3.20829e-06	4	4.16426e-05	22	9.98264e-05	42	1.5991e-06	2	2.50831e-06	4	1.11085e-05	8	1.38359e-06	3			3.05619e-06	4	3.74782e-06	5	2.87664e-07	1	9.11452e-07	1	3.77747e-07	1			1.97347e-06	2	3.32268e-06	4
cazy	GH8	glycoside hydrolase family 8	2.33907e-05	13	4.56312e-05	17	1.0292e-06	1			7.65234e-05	25	2.7868e-05	13	6.9493e-05	18	4.76424e-05	19	3.41754e-05	11			5.19229e-05	21	7.9787e-05	20	0.000207832	39	6.97025e-05	19			6.91764e-05	28	0.000152982	58	0.000213005	35	2.09796e-05	10	7.22552e-05	20	3.45378e-05	16	0.000112528	27	0.000132149	30	2.74652e-05
cazy	GH88	glycoside hydrolase family 88	1.43101e-06	1	8.87915e-06	4	1.62677e-06	1			1.50156e-05	8	4.51083e-06	3	7.85341e-06	5	3.95741e-06	3	2.15106e-05	7	0	0	3.85915e-06	2	4.8338e-06	2	3.79673e-05	13	5.65877e-06	3	0	0	1.05051e-05	7	1.51563e-05	7	3.26421e-06	4	1.64159e-05	7	3.6646e-06	4	4.54597e-06	2	3.19004e-06	2	4.00364e-06	4	2.52205e-06
cazy	GH9	glycoside hydrolase family 9	2.57223e-05	13	0.000351077	20	0.000264577	48	0.00130914	49	9.16792e-06	6	0.000205086	36	0.00107974	66	0.000702334	48	1.32157e-05	10	8.98016e-05	24	0.000480873	85	1.88717e-05	11	0.000810041	57	0.000198091	38	1.48578e-05	5	0.000162653	43	0.000153252	75	4.97394e-05	25	0.000597446	60	7.56036e-05	30	0.00017946	41	0.00087216	57	5.57679e-05	25	5.25693e-05
cazy	GH94	glycoside hydrolase family 94	0.000389844	90	0.000157058	54	0.000300434	75	0.00017205	44	0.000888169	110	0.000256054	62	0.000707609	115	0.000548872	139	0.000319406	64	0.000107863	27	0.000813923	131	0.000185201	44	0.000395923	98	0.000554881	96	0.000170392	34	0.000652754	149	0.00107846	169	0.000239181	93	0.000780621	121	0.00079849	134	0.000575939	99	0.000473207	105	0.000238329	96	0.000113683
cazy	GH95	glycoside hydrolase family 95	2.54659e-05	9	3.57689e-05	19	5.26614e-06	5	8.37363e-07	1	2.6034e-05	14	3.82259e-05	17	3.55405e-05	17	3.38902e-05	11	0.000193338	45	1.72513e-05	10	5.33103e-05	18	2.24841e-05	13	0.00060992	52	7.37804e-05	16	1.60472e-05	8	2.23412e-05	15	7.07695e-05	38	1.74017e-06	1	0.000112015	35	3.87723e-06	2	6.82167e-07	1	6.02601e-06	4	3.91107e-05	18
cazy	GH97	glycoside hydrolase family 97	0.000270359	55	0.000358522	76	0.00034657	46	0.000227904	43	0.000250274	50	0.000444383	84	0.000264731	31	8.85621e-05	25	0.000759888	81	0.000282302	60	0.000385042	62	0.000198477	52	0.000455989	62	0.000840215	75	2.68616e-05	4	0.000321263	74	0.000462687	89	0.000157511	46	0.000383325	67	0.000417826	79	0.000269303	69	0.000141591	23	0.000530089	90	0.000109364
cazy	GT1	glycosyltransferase family 1	0.000256156	77	0.000212927	100	7.61963e-05	34	2.21633e-05	8	0.000270142	87	0.000181235	60	0.000355729	108	0.000182429	48	8.69643e-05	22	1.38144e-05	6	8.32022e-05	42	0.000167091	52	4.04876e-05	17	0.000153188	51	6.11384e-05	20	4.38613e-06	3	0.000115241	60	0.000189985	83	0.000106919	30	9.02306e-05	34	7.11998e-05	24	0.00010721	31	0.000151712	67	0.000243321
cazy	GT10	glycosyltransferase family 10			3.06294e-05	6	3.82399e-05	6	1.48416e-05	3	6.8525e-06	3	7.21894e-06	3			7.77134e-06	2			6.20893e-05	6	1.0913e-05	4	3.82196e-06	2	1.58589e-05	6	8.95588e-06	3	2.51221e-05	4	1.25624e-05	5	2.01069e-06	1			3.01024e-05	5	1.25085e-05	4	6.93877e-06	3	3.61932e-05	5	1.91692e-05	4	1.55548e-05
cazy	GT2	glycosyltransferase family 2	9.75531e-05	50	0.000145572	91	5.36685e-05	29	7.40135e-05	14	6.79695e-05	41	0.000100044	55	0.00010699	61	0.000143085	71	5.23884e-05	34	3.34401e-05	22	8.73556e-05	42	5.5098e-05	26	0.000157666	77	0.000112027	56	2.5873e-05	12	0.00027194	96	0.000139042	80	7.10352e-05	52	7.18951e-05	42	9.74844e-05	48	0.000177086	46	5.60363e-05	36	4.46221e-05	35	0.00013351
cazy	GT26	glycosyltransferase family 26	9.41776e-07	1					2.17018e-06	1	1.5723e-06	2			0	0	1.1312e-06	1	7.13731e-05	1											1.00836e-06	1	5.07603e-07	1	9.24518e-06	5	1.00845e-06	1	3.55505e-06	2	1.97979e-06	1			1.21576e-06	1			1.08896e-05
cazy	GT28	glycosyltransferase family 28	0.000187552	55	0.000226781	78	0.000180313	48	4.21583e-05	17	0.000225777	68	0.000147294	51	0.000130908	53	0.00014782	46	0.000112948	42	3.9037e-05	16	7.37653e-05	27	9.5435e-05	37	0.00014125	63	0.000194098	51	0.000109511	31	0.000180624	77	0.000150256	70	0.000212384	74	0.000110184	45	0.000219712	76	9.61899e-05	42	0.000186123	66	0.000108202	44	0.000268107
cazy	GT3	glycosyltransferase family 3	0.000560211	82	0.000737226	94	0.000378914	53	6.98701e-05	23	0.000400799	69	0.000668755	106	0.00127225	117	0.0002338	43	0.000427277	66	0.000279022	76	0.000543554	92	0.000581282	98	0.000856093	122	0.000649967	74	0.000226003	46	0.000319836	80	0.000789249	117	0.000288267	75	0.00082473	136	0.000323474	99	0.000459887	107	0.000407137	77	0.000588178	113	0.000279037
cazy	GT30	glycosyltransferase family 30			1.54018e-05	10	3.98034e-06	3	6.35888e-06	4			3.96916e-07	1	2.55276e-06	2							1.64271e-06	2			1.71212e-05	6					8.86963e-07	2	4.74381e-06	6			7.07375e-07	1	5.64033e-06	1	8.86791e-07	1	1.47106e-06	1			1.12877e-05
cazy	GT31	glycosyltransferase family 31			2.07154e-06	2	1.7438e-05	4			9.21456e-07	1			1.01597e-06	1					1.17457e-05	5									1.45469e-06	1	2.71295e-05	8					7.81381e-07	1					8.76544e-07	1	3.07552e-06	2	4.60367e-06
cazy	GT35	glycosyltransferase family 35	0.00285168	475	0.00271772	555	0.00217138	431	0.000969948	169	0.00253848	463	0.00273711	516	0.00346576	533	0.00261869	375	0.00157655	291	0.000965259	236	0.00300948	541	0.00171061	369	0.00428189	666	0.00310263	484	0.00293172	308	0.00409122	613	0.00337984	714	0.00322782	607	0.0023603	480	0.00273332	533	0.00293737	540	0.00272041	473	0.00250142	555	0.00275952
cazy	GT36		0.000672316	124	0.00110263	194	0.000849496	138	0.000344806	80	0.000263902	65	0.000756183	155	0.00116531	165	0.00126384	166	0.000253494	50	8.14411e-05	31	0.00159152	207	0.000179982	53	0.00145272	234	0.000214625	70	0.000146567	29	0.00148439	244	0.00142748	253	0.000886402	189	0.00142381	187	0.00125271	199	0.00127939	197	0.000628465	133	0.000884054	177	0.000377972
cazy	GT4	glycosyltransferase family 4	0.000211148	66	0.000232396	80	0.000186856	55	4.98817e-05	18	0.00018133	72	0.000393687	89	0.000318803	100	0.00017585	51	0.000273672	58	0.000128709	36	0.000132174	51	0.000133065	55	0.000220085	60	0.000312025	80	0.000124326	46	0.000183279	75	0.000266546	107	8.15105e-05	55	0.000210927	64	0.000197569	97	0.000165144	59	0.000243355	53	0.000227178	82	0.000399759
cazy	GT41	glycosyltransferase family 41	1.16185e-05	6	4.81672e-07	1	9.74191e-07	1	2.31029e-05	8			1.82877e-05	8			8.10659e-05	12			1.65534e-05	6			2.23487e-05	11	1.13161e-05	7	0	0			8.82565e-06	4			1.14551e-06	2	7.58095e-07	1	7.28751e-05	20	0.000181673	21	5.66452e-06	4	1.2036e-05	9	1.17221e-05
cazy	GT5	glycosyltransferase family 5	0.00155941	221	0.001299	278	0.00101941	208	0.000614987	120	0.00145199	206	0.00126785	251	0.00140533	220	0.00125186	179	0.00094888	144	0.000585227	124	0.00192799	243	0.000995186	172	0.00125074	230	0.00111962	179	0.00143036	154	0.00199362	283	0.00141044	307	0.0012944	240	0.00135101	193	0.00139968	228	0.00151127	256	0.00135125	220	0.00137507	254	0.0012241
cazy	GT51	glycosyltransferase family 51	1.59477e-06	2	1.51778e-05	4	2.13707e-06	3	4.41567e-06	4	2.46392e-06	3	3.26124e-05	12	1.4067e-05	13	2.74414e-05	20	6.65012e-06	10	0	0	1.17097e-05	8	4.03673e-06	3	1.65433e-05	8	1.2602e-05	13	1.7942e-05	9	1.58134e-05	16	7.64255e-06	12	7.63148e-06	7	3.16465e-06	1	3.62649e-06	5	2.4787e-06	4	8.73471e-06	8	2.30049e-06	2	2.722e-05
cazy	GT75	glycosyltransferase family 75
cazy	GT8	glycosyltransferase family 8	2.28436e-06	2	9.7407e-06	7	4.89889e-06	2	1.16278e-06	1	2.79616e-06	3	2.07979e-06	3	3.22971e-06	2	1.61774e-05	7	5.32507e-06	4			1.06242e-06	1	9.28994e-07	1	2.5499e-05	19			9.66659e-07	1	1.7664e-06	1	2.33642e-06	3	3.0486e-06	2	2.61432e-06	3					7.44088e-07	1	1.61376e-05	8	2.91786e-05
cazy	GT9	glycosyltransferase family 9	3.18756e-05	2	3.28598e-05	6	2.07771e-06	2			2.89192e-05	2	2.35798e-05	3			1.41095e-06	2	3.05381e-05	2							4.6808e-05	2							9.97433e-07	1	9.05703e-06	3							1.5278e-06	1	1.27975e-06	1	2.36194e-06
cazy	PL11	polysaccharide lyase family 11	2.8698e-05	12	6.73592e-06	6	0.000237175	40	9.58116e-06	5	9.98099e-05	34	5.40367e-05	23	0.000112128	41	3.41231e-05	15	0.000263322	51	4.25535e-06	3	0.000143175	30	0.000255335	44	0.000141296	32	0.000107256	28	0.000334589	44	5.10855e-05	24	0.000108365	33	2.43472e-05	14	3.35786e-05	14			6.25015e-05	19	6.33207e-05	22	2.84456e-05	12	4.65355e-06
cazy	unannotated		0.972329	112062	0.972723	145410	0.983951	117224	0.978282	97535	0.978436	113667	0.977978	127882	0.975466	128113	0.979345	110340	0.980694	101758	0.978876	99678	0.974554	122147	0.983337	93583	0.977022	141392	0.97477	113619	0.982032	90028	0.974829	134656	0.972505	150945	0.975256	131516	0.981014	125174	0.976799	131578	0.976169	129662	0.975734	113241	0.972053	133895	0.97922
cog	A	RNA processing and modification	0.000239852	82	0.000245396	111	0.000184153	76	0.000207165	55	0.000166354	69	0.000152965	62	0.000132915	57	0.000177353	64	0.000243742	90	0.000395075	69	0.00014894	57	0.000127516	51	0.000135393	74	0.00020465	80	0.000113912	43	0.000166972	77	0.000215808	106	9.56028e-05	61	0.000144676	71	0.000113796	66	0.000102257	40	9.77591e-05	43	0.000127903	59	0.000205002
cog	B	Chromatin Structure and dynamics	0.00193289	242	0.0030666	350	0.00319466	328	0.00405593	345	0.00157626	211	0.00482082	449	0.00204283	261	0.00121136	193	0.00557907	354	0.00256196	264	0.00124825	237	0.00158899	213	0.00189486	285	0.00201902	235	0.000607947	100	0.00383233	359	0.00217824	290	0.00237687	372	0.00446696	445	0.00169922	297	0.00693239	514	0.00215943	250	0.00232668	334	0.0012493
cog	C	Energy production and conversion	0.128178	13464	0.124943	16974	0.111101	13105	0.113456	11561	0.122241	13149	0.115871	14528	0.118474	14466	0.11005	11665	0.112173	11178	0.128897	13173	0.125262	15194	0.109852	11919	0.129063	17184	0.122038	13282	0.124126	11528	0.130166	15590	0.130688	17552	0.116913	15494	0.124375	14993	0.131722	16419	0.125672	15511	0.125578	13516	0.120215	15888	0.122098
cog	D	Cell cycle control and mitosis	0.00945153	1884	0.0134105	2523	0.01277	1672	0.00713338	1284	0.0113785	2064	0.01825	2418	0.00772979	2038	0.0114766	2134	0.01149	1788	0.0225811	1874	0.00757277	1868	0.00623008	1407	0.00870172	2073	0.00982023	1922	0.0109311	1451	0.013244	2220	0.0126232	2725	0.0128413	2405	0.00897438	1809	0.00925973	2199	0.0129887	2274	0.0110395	1784	0.0147833	2236	0.0111324
cog	E	Amino Acid metabolis and transport	0.100527	14338	0.10271	19413	0.092692	14609	0.10723	11624	0.1082	15715	0.0981985	16162	0.113768	18081	0.104693	14155	0.0901619	12568	0.11762	13233	0.096919	15563	0.0832917	12257	0.112704	19723	0.10311	15406	0.102462	10938	0.105476	17587	0.106773	20524	0.0971375	16416	0.112129	16623	0.109592	17451	0.0910023	15043	0.0957179	13950	0.0988051	17577	0.0914047
cog	F	Nucleotide metabolism and transport	0.0442699	6816	0.0457399	8944	0.0355069	6349	0.0312339	4856	0.0462176	7449	0.0418697	7564	0.0441494	8005	0.0398715	6304	0.0382535	5836	0.0345064	5028	0.0359831	6896	0.0350461	6143	0.0434446	8736	0.0419284	7119	0.0353195	4770	0.0435688	8189	0.0437061	9505	0.0394821	8033	0.037983	7378	0.0441236	8434	0.037625	7483	0.0407318	6782	0.0413707	8083	0.0420668
cog	G	Carbohydrate metabolism and transport	0.201911	20631	0.195701	27215	0.159912	19415	0.149362	15426	0.207805	21868	0.191656	22373	0.191869	23298	0.20864	20509	0.19716	19105	0.121979	15525	0.197322	24015	0.166249	18722	0.192209	25701	0.197813	21925	0.155471	14475	0.191555	23606	0.201353	29590	0.20123	25585	0.178931	21808	0.18533	23968	0.181248	22426	0.190408	21162	0.188204	24693	0.186091
cog	H	Coenzyme metabolis	0.0338648	5443	0.0345773	6703	0.0318846	5092	0.0335104	3994	0.033673	5729	0.0313318	5429	0.0338338	5959	0.0290531	4458	0.0302534	4361	0.054028	5208	0.0317029	5091	0.0259741	4367	0.0381281	6608	0.0312562	5085	0.0370442	3855	0.0328349	6007	0.0362771	7296	0.0280436	5628	0.0321739	5483	0.0355958	6126	0.0318461	5525	0.0295178	4964	0.0296786	6203	0.0320048
cog	I	Lipid metabolism	0.0491267	5210	0.0451442	6536	0.0490658	5486	0.0539992	4531	0.0467307	5205	0.0496723	6077	0.0509458	6104	0.0489885	4857	0.0406253	4472	0.0631451	4817	0.043927	5493	0.0460782	4533	0.0435747	6210	0.0522029	5576	0.0558849	4376	0.0463118	5784	0.0446833	6699	0.0473956	5874	0.0535788	5947	0.0569797	6167	0.0482061	5827	0.0455959	5052	0.044835	6137	0.0489259
cog	J	Tranlsation	0.1837	18338	0.193741	24115	0.198961	21203	0.16262	16463	0.208757	19697	0.230419	24077	0.191092	20988	0.199374	19100	0.234723	18545	0.102315	13317	0.183566	21108	0.179644	15751	0.193765	24291	0.201151	19764	0.16294	14227	0.191554	22959	0.185751	24072	0.222212	24366	0.179196	20933	0.198411	22695	0.205462	23828	0.199914	19640	0.190607	22563	0.207909
cog	K	Transcription	0.0249636	4058	0.0241726	5277	0.0210162	3954	0.0167577	2711	0.0240459	4394	0.0263625	4574	0.0256906	4712	0.0255262	4235	0.0232064	3613	0.0114389	2350	0.0230195	4280	0.0150937	2617	0.0272162	5288	0.0235202	3982	0.0219971	2893	0.0259942	5156	0.0249011	5629	0.0213367	4626	0.0230738	4241	0.0238777	4788	0.0243999	4787	0.0226936	3892	0.0231109	4735	0.024477
cog	L	Replication and repair	0.00754847	1732	0.00763981	2197	0.00550429	1400	0.00368281	809	0.00829591	1915	0.00697962	1749	0.00780657	2083	0.00820378	1902	0.00729923	1530	0.00305171	822	0.0056408	1541	0.00533848	1062	0.00753219	2087	0.00629053	1587	0.00583963	1108	0.0073599	2057	0.00790917	2389	0.00621513	1813	0.00571993	1488	0.00644803	1845	0.00641956	1692	0.00610045	1466	0.0065519	1714	0.00683932
cog	M	Cell wall/membrane/envelop biogenesis	0.0292447	4932	0.02989	6167	0.0272492	4642	0.0327282	3880	0.0238136	4558	0.0241101	5053	0.0284959	5783	0.0211639	4402	0.022213	4040	0.0464932	3784	0.020584	4322	0.0252412	3846	0.0226283	5501	0.0299399	4646	0.0286828	3493	0.0249612	5512	0.0269772	6819	0.0298371	5206	0.026687	4949	0.0219352	5108	0.0229404	4738	0.0228767	4328	0.0232211	5336	0.0364638
cog	N	Cell motility	0.00989094	673	0.00931087	923	0.0215982	1388	0.0321707	1128	0.0123993	756	0.0107039	879	0.00925144	869	0.0112764	1125	0.0139838	679	0.0257477	796	0.0188616	1125	0.00782884	551	0.017428	1366	0.0130014	779	0.0177414	929	0.0105357	956	0.0175391	1206	0.0133677	1141	0.017929	951	0.0151521	1048	0.0184814	1175	0.0184314	1365	0.0211042	1040	0.00907846
cog	O	Post-translational modification, protein turnover, chaperone functions	0.0761735	6412	0.0626454	8016	0.045727	6138	0.0684443	5833	0.0625113	5560	0.0518394	6647	0.0702016	6743	0.0641085	6370	0.0776363	6632	0.0772315	5090	0.0618444	6699	0.0645474	3693	0.0553228	6762	0.0650873	5963	0.0574605	4965	0.0622032	7450	0.0550432	7543	0.0658536	6598	0.0629961	6423	0.0650992	6909	0.0652385	7311	0.0651219	5831	0.0541404	6361	0.0649521
cog	P	Inorganic ion transport and metabolism	0.0278355	4180	0.0336043	4978	0.030478	4016	0.0387799	4270	0.018425	3263	0.0256255	4888	0.027911	4626	0.0162803	3053	0.0212692	3426	0.0471883	5717	0.0171087	3285	0.019535	3452	0.0278011	4387	0.0209756	3349	0.0348409	2957	0.0213283	4616	0.0252329	5378	0.0138423	3216	0.0267283	4423	0.0235513	3782	0.0242842	4106	0.0192353	3311	0.0266812	5042	0.0273946
cog	Q	Secondary Structure	0.00754571	963	0.00831396	1246	0.00755755	1021	0.00784989	895	0.00584818	974	0.00622018	1028	0.00585858	1120	0.00601957	937	0.008781	945	0.0113092	1045	0.00690613	1035	0.00508628	719	0.00722905	1240	0.00723019	1096	0.00570461	783	0.00924921	1240	0.00776512	1264	0.00510135	1045	0.00725271	1097	0.00720317	1226	0.00944868	1196	0.00568132	877	0.00726612	1252	0.00652088
cog	R	General Functional Prediction only	0.031885	6002	0.0333636	7434	0.0241103	4932	0.032944	4794	0.0283458	5663	0.032013	6114	0.0347339	6734	0.0251182	4985	0.0323977	5210	0.0366775	5634	0.0249088	5627	0.0231497	4168	0.0276691	6254	0.0322536	5438	0.03113	4426	0.0269056	6020	0.0363426	8013	0.0244306	5807	0.0328793	6345	0.0279877	6310	0.0301902	5952	0.0235782	4979	0.0260813	6097	0.0269619
cog	S	Function Unknown	0.00693739	1189	0.00799123	1461	0.00465309	1066	0.00776179	1145	0.00430182	1032	0.00502652	1045	0.00377572	1086	0.00363472	952	0.00549624	980	0.0135964	1257	0.00723535	1353	0.00365839	801	0.00466645	1255	0.00592924	1015	0.00623011	972	0.00516291	1333	0.0108365	1766	0.00538692	1142	0.00695522	1073	0.00590744	1345	0.00404211	1129	0.00504015	948	0.00884799	1412	0.00480407
cog	T	Signal Transduction	0.0161667	2845	0.0154365	3655	0.013992	2731	0.0135391	1976	0.0178189	3177	0.0145009	2868	0.0162659	3289	0.0175607	3167	0.0148894	2506	0.0133027	1834	0.0149809	3187	0.0137662	2061	0.0167128	3856	0.0156908	2994	0.0129247	1875	0.0165176	3377	0.0170649	4411	0.0160909	3606	0.0142636	2808	0.0153007	3345	0.0160917	3067	0.0155063	2982	0.0167917	3385	0.0168416
cog	U	Intracellular trafficing and secretion	0.00358791	948	0.00441876	1168	0.00536748	1036	0.00316756	716	0.00315425	616	0.00391123	968	0.00472685	1054	0.00424721	1048	0.00379625	819	0.00264046	764	0.00380621	931	0.00182237	471	0.00475604	1145	0.00286799	758	0.00645014	876	0.00401145	1068	0.00362915	1170	0.00264579	787	0.0044807	997	0.00305936	977	0.00568934	1255	0.00342305	804	0.00344994	934	0.00515084
cog	V		0.00561396	1368	0.00646001	1800	0.00450539	1088	0.00692497	1222	0.00499343	1278	0.00484191	1182	0.00679332	1646	0.0065101	1479	0.0076893	1389	0.00725718	1221	0.00673454	1306	0.00437129	782	0.00554891	1584	0.00536861	1165	0.00483741	958	0.00782331	1733	0.00571411	1726	0.00482408	1319	0.00738532	1591	0.00546795	1491	0.0081908	1609	0.00483125	1218	0.00533627	1519	0.00531973
cog	W		0.000364812	99	0.000387792	117	0.000359686	74	0.000550284	80	0.000238857	69	0.000191888	74	0.000408801	96	0.000437435	91	0.000272155	65	0.000481794	101	0.000307024	50	0.000323408	65	0.000179272	56	0.00019651	49	0.00217285	187	0.000138339	74	0.000115444	64	0.000206461	49	0.000315983	92	0.000205946	56	0.000197003	79	0.000512413	83	0.000431694	78	0.000296238
cog	X	Trans-activation protein X	0.000667855	136	0.000771051	244	0.0004794	104	0.00147828	239	0.000752269	144	0.000403271	147	0.000802605	175	0.000590833	163	0.000575699	124	0.00103525	150	0.00124081	221	0.000354685	102	0.000255311	125	0.000759903	169	0.000427877	79	0.000635411	158	0.000578839	219	0.000793218	198	0.00122285	222	0.00118505	220	0.00238253	203	0.000673292	158	0.000563512	175	0.00053192
cog	Z	Cytoskeleton	0.000804885	169	0.000818313	202	0.000961966	178	0.000441178	100	0.0011077	208	0.000895283	165	0.000883554	197	0.000883344	170	0.000529543	120	0.000436276	99	0.00100728	176	0.00121977	188	0.00106273	232	0.000966682	189	0.0010535	153	0.000807845	200	0.000921546	269	0.00108628	216	0.000695252	154	0.00101258	201	0.000720147	193	0.0011774	192	0.000688918	181	0.000810543
cog	unannotated		0.0910327	9020	0.0897712	12037	0.165486	12528	0.157257	11906	0.0887714	8286	0.0923579	10905	0.0970795	10435	0.122974	10938	0.0873928	8161	0.170697	12848	0.146434	11838	0.224831	8067	0.104493	12710	0.0959619	8912	0.164992	11147	0.113101	13357	0.0947492	12114	0.101515	11487	0.122994	12503	0.0989233	11090	0.112439	12670	0.123585	11111	0.133278	12614	0.101173
enzyme_ec	0.1.1		4.32433e-06	2			9.96667e-07	1			0.000246161	9					0.000349154	18	3.50071e-05	3					0.000440612	10	1.51144e-05	6	6.4072e-05	8	8.69853e-05	13							0.000332373	19							0.00227847	152
enzyme_ec	0.2.1		0.000350924	25							6.69937e-05	7					0.00335257	95							0.00561512	109	0.00144384	70	0.000442885	26	0.000182553	35			6.64649e-05	6			0.00251723	96							0.0315784	677
enzyme_ec	1.1.1.-		0.000914703	248	0.000816398	293	0.000608807	175	0.000460676	97	0.000848315	256	0.00126347	308	0.000883146	273	0.00102804	212	0.000879443	235	0.000586163	157	0.000440242	181	0.000694511	180	0.000924348	255	0.000814804	236	0.00128341	206	0.000793484	233	0.00104256	375	0.000886483	283	0.00070275	234	0.00149867	305	0.000713014	220	0.000692093	200	0.0011809	303	0.000683222
enzyme_ec	1.1.1.1	oxidoreductases acting on the ch-oh group of donors with nad+ or nadp+ as acceptor alcohol dehydrogenase	0.00342714	332	0.00415821	399	0.00504141	438	0.00731497	451	0.00333984	351	0.00541625	499	0.00459555	417	0.00635311	406	0.00297998	306	0.00786134	408	0.00452823	501	0.00281632	312	0.00465496	513	0.00455394	415	0.00693074	335	0.0058544	437	0.00377219	475	0.00450238	485	0.00655656	477	0.00583307	453	0.00563411	479	0.00480621	384	0.00394919	447	0.00494517
enzyme_ec	1.1.1.10	oxidoreductases acting on the ch-oh group of donors with nad+ or nadp+ as acceptor l-xylulose reductase			8.84908e-07	1	3.79238e-06	2	8.45718e-07	1							3.5872e-06	2			2.33642e-06	1	1.36818e-06	1			5.60234e-07	1					1.40431e-06	1					4.43087e-06	1	9.01091e-07	1	8.89516e-07	1	5.1855e-06	2	5.36036e-07	1	7.94465e-07
enzyme_ec	1.1.1.100	oxidoreductases acting on the ch-oh group of donors with nad+ or nadp+ as acceptor 3-oxoacyl-[acyl-carrier-protein] reductase	0.00071161	114	0.00145503	173	0.00106276	134	0.000455277	83	0.000558774	106	0.000811308	150	0.00113926	172	0.000620374	119	0.000995746	113	0.000683733	118	0.000546774	109	0.00192702	137	0.00134396	143	0.000981214	125	0.000622016	86	0.000699529	133	0.00064902	136	0.000548867	119	0.000960904	162	0.000636299	139	0.000962289	156	0.000788296	123	0.000983201	141	0.000853726
enzyme_ec	1.1.1.103	oxidoreductases acting on the ch-oh group of donors with nad+ or nadp+ as acceptor l-threonine 3-dehydrogenase	7.19889e-05	23	5.09101e-05	18	1.22082e-05	4	6.86904e-05	21	4.58282e-05	13	4.51663e-06	3	3.58903e-05	15	6.47357e-05	13	2.98016e-05	9	9.51193e-05	31	2.99855e-05	10	3.96886e-05	9	0.000110181	18	4.70328e-06	3	0.000185359	29	0.000159455	35	6.52982e-07	1	3.06444e-05	15	4.67267e-05	19	5.61052e-05	25	5.62415e-05	17	2.29946e-05	8	4.65511e-05	18	3.65489e-05
enzyme_ec	1.1.1.108	oxidoreductases acting on the ch-oh group of donors with nad+ or nadp+ as acceptor carnitine 3-dehydrogenase	4.30518e-06	3	3.01724e-06	2	2.86688e-06	2	9.45489e-06	5			1.77716e-06	1	6.36345e-06	3	3.09208e-06	2			3.27595e-06	2	9.28669e-07	1	1.47742e-05	5	8.57403e-06	5							2.34955e-06	2			1.68663e-05	5	8.1731e-07	1	3.41321e-06	2	2.38826e-06	1	1.04581e-06	1	2.94054e-05
enzyme_ec	1.1.1.125	oxidoreductases acting on the ch-oh group of donors with nad+ or nadp+ as acceptor 2-deoxy-d-gluconate 3-dehydrogenase	4.22804e-06	2	2.85174e-06	2							0	0			3.5205e-06	2	4.42098e-06	2			2.29683e-06	2	0	0	4.28903e-06	3	3.84212e-06	2					3.07001e-06	2			1.09043e-06	1					1.22232e-06	1	9.96715e-07	1	5.861e-06
enzyme_ec	1.1.1.127	oxidoreductases acting on the ch-oh group of donors with nad+ or nadp+ as acceptor 2-dehydro-3-deoxy-d-gluconate 5-dehydrogenase	3.89332e-05	9	2.76267e-05	10	1.69413e-05	4	1.07382e-05	3	1.33934e-05	3	1.28139e-05	4	7.93493e-06	4	2.19205e-05	6	6.84385e-05	13			8.06417e-06	5	7.03654e-06	5	1.45236e-05	5	2.13647e-05	9	3.31021e-05	5	1.84976e-05	8	2.56703e-05	12	1.01883e-05	5	4.14592e-05	15	4.57096e-06	4			1.99952e-05	5	2.39663e-05	9	2.54254e-05
enzyme_ec	1.1.1.130	oxidoreductases acting on the ch-oh group of donors with nad+ or nadp+ as acceptor 3-dehydro-l-gulonate 2-dehydrogenase	1.04104e-05	4	7.04171e-06	4	8.75285e-06	5	0	0	5.38059e-05	10	4.58234e-06	3	1.16561e-05	8	1.87444e-05	5	2.2231e-05	4			9.08468e-06	5	8.38339e-07	1	4.15858e-06	3	7.8152e-06	6	0	0			3.48087e-06	4	7.28388e-06	4	1.75431e-05	7	5.04321e-06	4	4.39469e-06	3			1.22068e-05	7	9.13289e-06
enzyme_ec	1.1.1.133	oxidoreductases acting on the ch-oh group of donors with nad+ or nadp+ as acceptor dtdp-4-dehydrorhamnose reductase	0.00017889	59	0.000278765	91	0.000172288	56	8.7036e-05	33	0.000384646	110	0.000151953	60	0.000266217	79	0.000259476	65	0.00026761	68	5.99014e-05	22	0.000133011	47	0.000201797	72	0.000139727	74	0.000224084	78	0.000113816	29	0.00018672	69	0.000230084	96	0.000222757	74	0.000193023	57	0.000280483	87	0.000171939	67	0.000153632	49	0.000157431	70	0.000339811
enzyme_ec	1.1.1.136	oxidoreductases acting on the ch-oh group of donors with nad+ or nadp+ as acceptor udp-n-acetylglucosamine 6-dehydrogenase	4.14535e-07	1	5.84117e-05	23	5.23793e-05	18	3.29645e-05	6	2.58943e-05	7	3.09584e-05	6	0.00016979	24	5.77679e-05	22	4.56192e-06	4	4.3298e-06	2	1.09624e-06	1	6.53207e-06	4	3.58895e-05	12	1.6719e-06	2	5.45775e-05	11	1.22071e-06	1	0.000112316	37	1.05267e-05	7	0.000147465	29	3.81044e-06	3	3.94873e-05	13	7.35788e-07	1	0.000196263	47	3.36857e-05
enzyme_ec	1.1.1.14	oxidoreductases acting on the ch-oh group of donors with nad+ or nadp+ as acceptor l-iditol 2-dehydrogenase	0.00134348	140	0.00139812	183	0.000949971	124	0.00138914	153	0.0011893	153	0.00209334	200	0.0015412	195	0.000936418	108	0.00116309	167	0.000797474	113	0.00118561	157	0.000973788	129	0.0013262	177	0.00145622	127	0.00112934	107	0.00178315	202	0.00185766	228	0.00101519	147	0.0026401	196	0.00213035	202	0.00086854	138	0.00123895	177	0.00156517	171	0.000930779
enzyme_ec	1.1.1.140	oxidoreductases acting on the ch-oh group of donors with nad+ or nadp+ as acceptor sorbitol-6-phosphate 2-dehydrogenase	9.84144e-05	15	8.7535e-05	20	0.000392632	25	0.000355932	20	5.19984e-05	11	0.000707411	26	0.0003224	28	5.84689e-05	14	0.00016955	21	0.000142633	33	7.74083e-05	15	0.000119677	18	5.14186e-05	14	0.000171967	15	0.000276594	16	0.000319212	25	0.000267594	25	3.24603e-06	1	0.000719065	31	0.000216528	22	0.000165559	21	5.72834e-05	11	0.000239184	25	0.000129097
enzyme_ec	1.1.1.157	oxidoreductases acting on the ch-oh group of donors with nad+ or nadp+ as acceptor 3-hydroxybutyryl-coa dehydrogenase	0.00391346	174	0.00351713	250	0.00391737	248	0.00376122	181	0.00489554	198	0.00304758	207	0.00374449	217	0.00474362	171	0.00304378	132	0.00629258	217	0.00496916	253	0.00449729	189	0.00310576	238	0.004973	215	0.00373196	190	0.00379183	224	0.00385758	267	0.00484455	259	0.00472665	242	0.00638568	268	0.00397623	242	0.00468789	227	0.00352056	249	0.00432681
enzyme_ec	1.1.1.159	oxidoreductases acting on the ch-oh group of donors with nad+ or nadp+ as acceptor 7Î±-hydroxysteroid dehydrogenase	0.000104113	23	2.89258e-05	12	2.0783e-05	9	8.31156e-05	12	1.46505e-05	7	6.84075e-05	19	2.00677e-05	12	0.000119446	25	1.714e-05	8	7.141e-05	14	2.67779e-05	10	6.74333e-05	25	0.000105682	15	3.246e-05	17	7.08261e-05	10	6.94782e-05	21	3.4767e-05	15	0.000123987	28	6.17509e-05	16	0.000190542	26	0.000131735	23	4.04687e-05	14	4.90736e-05	18	8.18265e-06
enzyme_ec	1.1.1.169	oxidoreductases acting on the ch-oh group of donors with nad+ or nadp+ as acceptor 2-dehydropantoate 2-reductase	0.000129855	32	3.87345e-05	14	1.77281e-05	9	1.02559e-05	5	9.34252e-05	36	5.62481e-05	25	5.97204e-05	22	8.05731e-05	25	4.27736e-05	14	2.25001e-05	13	7.32163e-05	17	2.48716e-05	11	7.00303e-05	23	4.30719e-05	19	4.66866e-05	11	0.000210547	32	2.6886e-05	21	7.88469e-05	24	0.000107346	32	0.000133569	32	7.63126e-05	22	8.64582e-05	16	7.81569e-05	25	3.21593e-05
enzyme_ec	1.1.1.17	oxidoreductases acting on the ch-oh group of donors with nad+ or nadp+ as acceptor mannitol-1-phosphate 5-dehydrogenase	3.20494e-05	11	4.23933e-05	17	0.00010698	16	7.59142e-06	4	0.0002875	35	0.000535104	42	8.90914e-05	18	0.000133389	22	0.000130754	19	0.000206584	28	1.61948e-05	7	3.35481e-05	9	3.13387e-05	9	0.000252731	22	0.0003593	32	8.77601e-05	14	6.45999e-05	24	1.00402e-05	5	1.85284e-05	8	0.000294183	37	2.3112e-05	12	1.45218e-05	6	5.31037e-05	14	3.70003e-06
enzyme_ec	1.1.1.178	oxidoreductases acting on the ch-oh group of donors with nad+ or nadp+ as acceptor 3-hydroxy-2-methylbutyryl-coa dehydrogenase	3.37142e-07	1	5.36291e-07	1	4.15758e-06	2			2.98882e-07	1	1.0942e-06	2			1.32759e-06	2			2.71582e-06	2	2.67223e-06	2			4.16554e-06	3			1.87262e-06	1	2.67059e-06	2					1.83594e-06	2	3.03744e-07	1			4.25648e-06	2	6.00087e-07	1	5.59986e-06
enzyme_ec	1.1.1.179	oxidoreductases acting on the ch-oh group of donors with nad+ or nadp+ as acceptor d-xylose 1-dehydrogenase (nadp+, d-xylono-1,5-lactone-forming)					7.89426e-07	1							8.13806e-06	2													9.93658e-07	1	1.85698e-06	2	3.70854e-07	1					2.86584e-06	1									4.04335e-07
enzyme_ec	1.1.1.18	oxidoreductases acting on the ch-oh group of donors with nad+ or nadp+ as acceptor inositol 2-dehydrogenase	0.000495789	70	0.0010858	134	0.00064053	71	0.000280321	46	0.000218355	50	0.000493056	89	0.000637212	91	0.000244527	45	0.0017069	118	0.000529483	103	0.000624122	86	0.000604191	68	0.000370177	63	0.000757802	97	0.000524087	71	0.000511077	95	0.000425777	85	0.00027371	50	0.000515693	69	0.000362323	65	0.000675585	101	0.000359693	66	0.000415803	72	0.00057342
enzyme_ec	1.1.1.184	oxidoreductases acting on the ch-oh group of donors with nad+ or nadp+ as acceptor carbonyl reductase (nadph)	9.25205e-07	1	7.94647e-07	1	6.76606e-06	4	1.00831e-06	1	7.25121e-07	1	1.26049e-06	1	3.64109e-06	2	2.41485e-06	2	5.64148e-07	1	3.93666e-06	3	2.63694e-06	3					9.3745e-07	1	8.31022e-07	1	3.87559e-06	3					1.51619e-06	1			1.08535e-06	1	1.11201e-05	4	9.17613e-07	1	1.01939e-06
enzyme_ec	1.1.1.193	oxidoreductases acting on the ch-oh group of donors with nad+ or nadp+ as acceptor 5-amino-6-(5-phosphoribosylamino)uracil reductase	2.3152e-05	16	3.21607e-06	3	2.99695e-06	3			3.73614e-05	17	1.78272e-05	11	1.26752e-05	8	3.93301e-05	20	3.15259e-05	19	5.385e-06	5	8.63488e-07	1	3.39622e-05	11	9.46171e-06	10	2.85384e-05	17	1.06984e-05	4	1.45565e-05	16	1.44056e-05	14	2.51419e-05	13	5.04558e-06	5	3.74819e-05	20	1.20483e-05	11	1.44151e-05	10	9.6962e-06	7	6.44418e-06
enzyme_ec	1.1.1.2	oxidoreductases acting on the ch-oh group of donors with nad+ or nadp+ as acceptor alcohol dehydrogenase (nadp+)	5.79517e-05	11	4.88655e-05	13	1.35947e-05	6	1.9862e-05	3	0.000102368	18	3.05048e-05	9	4.42122e-05	14	2.51739e-05	7	4.06014e-05	10	6.86067e-06	3	3.64286e-05	9	0.000113564	22	0.000162714	34	8.64946e-05	14	2.09746e-05	7	6.60068e-05	22	0.000138314	19	2.09158e-05	11	5.47066e-05	14	9.82578e-06	3	1.913e-05	7	2.28384e-05	8	5.90552e-05	15	3.36542e-06
enzyme_ec	1.1.1.202	oxidoreductases acting on the ch-oh group of donors with nad+ or nadp+ as acceptor 1,3-propanediol dehydrogenase	0.000469251	37	0.000373125	62	0.000164082	36	0.000556919	24	0.000314057	48	0.000365056	66	0.000471391	63	0.000287333	35	0.00032883	39	0.000793956	78	0.000274127	51	0.000243665	49	0.000209951	57	0.00035865	53	0.000521993	36	0.000345827	47	0.000369514	81	0.000244678	39	0.000315563	57	0.000302553	49	0.000337077	63	0.000137597	28	0.000417802	55	0.000316526
enzyme_ec	1.1.1.205	oxidoreductases acting on the ch-oh group of donors with nad+ or nadp+ as acceptor imp dehydrogenase	0.00289482	338	0.00301881	421	0.0027437	365	0.0019204	293	0.00318654	372	0.00326972	426	0.00330563	408	0.00364112	352	0.00387824	399	0.00247068	286	0.00250944	408	0.00281181	356	0.00321385	459	0.00342362	414	0.00319462	302	0.00316535	417	0.00296161	485	0.00298385	471	0.00254916	395	0.0033538	474	0.00278522	425	0.00303386	385	0.00268095	403	0.0036268
enzyme_ec	1.1.1.211	oxidoreductases acting on the ch-oh group of donors with nad+ or nadp+ as acceptor long-chain-3-hydroxyacyl-coa dehydrogenase			2.68094e-06	3	5.8648e-05	18					1.16509e-05	5			3.32688e-05	9			8.24558e-06	5	5.43865e-05	16	0.000122701	24	2.34077e-05	12			3.27634e-05	11	3.45942e-05	12					1.07061e-05	8	3.73099e-06	5	4.41234e-06	5	5.46015e-05	14	2.22328e-05	12	1.43538e-05
enzyme_ec	1.1.1.219	oxidoreductases acting on the ch-oh group of donors with nad+ or nadp+ as acceptor dihydroflavonol 4-reductase	9.01069e-05	13	8.43856e-07	1	3.02803e-05	5	0.00015674	21	1.88585e-05	5	2.31727e-05	8	3.92031e-06	1	6.01902e-05	6			3.36071e-05	9	3.82462e-05	8			5.04639e-07	1	3.15457e-05	5	5.75159e-05	14	5.49937e-06	2	8.20837e-06	3	3.49093e-05	7	2.29012e-05	8	3.38167e-05	10	7.98061e-05	15	3.15407e-05	6	6.07172e-05	15	5.44901e-06
enzyme_ec	1.1.1.22	oxidoreductases acting on the ch-oh group of donors with nad+ or nadp+ as acceptor udp-glucose 6-dehydrogenase	0.000262503	52	0.000238333	78	0.000182457	57	5.4036e-05	20	0.000189766	59	0.000375061	82	0.000239303	70	0.00034067	76	9.39336e-05	33	8.10059e-05	35	0.000103802	38	0.00015724	45	0.000206988	81	0.00015449	48	7.42373e-05	24	0.000130175	59	0.000432658	134	0.000174213	72	0.000128429	52	0.0001307	52	0.000114107	42	0.00023227	72	0.000190291	81	0.000240199
enzyme_ec	1.1.1.23	oxidoreductases acting on the ch-oh group of donors with nad+ or nadp+ as acceptor histidinol dehydrogenase	0.000278312	95	0.000294364	115	0.0002086	79	8.27275e-05	26	0.000396727	106	0.000408266	118	0.0003754	115	0.000427057	103	0.000359838	89	0.000122877	46	0.000277973	90	0.000175797	71	0.000452024	139	0.00037375	105	0.000241685	52	0.00034237	109	0.000319876	125	0.000318835	100	0.000296644	104	0.000421175	114	0.000287534	92	0.000319957	91	0.00029308	108	0.000287907
enzyme_ec	1.1.1.25	oxidoreductases acting on the ch-oh group of donors with nad+ or nadp+ as acceptor shikimate dehydrogenase (nadp+)	0.000163935	34	0.000122926	40	8.30305e-05	22	6.34542e-05	10	0.000187425	35	0.000325125	46	0.000342019	50	0.000244632	30	0.000500949	48	0.000191748	34	0.000291595	40	0.000222754	31	0.000153305	25	0.000305311	57	0.000137195	20	0.000343209	49	7.36058e-05	36	0.000242706	43	5.94972e-05	25	0.000241314	40	0.000151392	20	0.000205444	32	0.000149807	24	0.000382442
enzyme_ec	1.1.1.251	oxidoreductases acting on the ch-oh group of donors with nad+ or nadp+ as acceptor galactitol-1-phosphate 5-dehydrogenase	3.73302e-05	12	3.52404e-05	14	3.13625e-05	11	1.8176e-05	7	5.9284e-05	12	9.30595e-06	7	2.26606e-05	10	6.06811e-06	4	1.85971e-05	7	2.00874e-05	8	2.94433e-05	10	5.84404e-05	17	8.25646e-05	25	2.16019e-05	10	5.36172e-06	4	3.45955e-05	17	0.000159229	27	8.72068e-06	6	6.77996e-05	14	2.2572e-05	8	1.51599e-05	9	1.39641e-05	6	5.0543e-06	5	2.94068e-06
enzyme_ec	1.1.1.261	oxidoreductases acting on the ch-oh group of donors with nad+ or nadp+ as acceptor sn-glycerol-1-phosphate dehydrogenase	3.76265e-05	13	2.32394e-05	12	1.42113e-05	7	1.30284e-05	5	3.66769e-05	18	2.8194e-05	15	1.89188e-05	10	9.71757e-06	7	2.53836e-05	7	8.19633e-05	26	2.89955e-05	13	2.16903e-05	8	2.16605e-05	11	4.46889e-05	15	3.83609e-05	11	5.91326e-05	23	4.58446e-05	21	1.97223e-05	10	5.02822e-05	21	4.07823e-05	18	3.01387e-05	14	1.45121e-05	8	3.19158e-05	16	2.50479e-05
enzyme_ec	1.1.1.262	oxidoreductases acting on the ch-oh group of donors with nad+ or nadp+ as acceptor 4-hydroxythreonine-4-phosphate dehydrogenase	4.15409e-05	17	8.55592e-05	23	5.86077e-05	26	2.0426e-05	6	1.71865e-05	8	6.92463e-05	23	5.31188e-05	19	9.45716e-06	5	4.70376e-05	14	2.71584e-05	13	2.98313e-05	15	3.8293e-05	16	7.25532e-05	15	5.94205e-05	16	1.8266e-05	10	1.82511e-05	9	6.10099e-05	23	2.34093e-05	15	5.09565e-05	22	2.85401e-05	12	3.36267e-05	14	2.87146e-05	15	4.32448e-05	19	3.33852e-05
enzyme_ec	1.1.1.267	oxidoreductases acting on the ch-oh group of donors with nad+ or nadp+ as acceptor 1-deoxy-d-xylulose-5-phosphate reductoisomerase	0.000151452	46	0.000129438	62	7.69841e-05	27	3.69822e-05	11	0.000228571	57	0.000110169	45	0.000143798	47	0.000120204	41	7.99094e-05	30	6.00968e-05	22	7.48068e-05	32	7.3215e-05	28	0.000119931	55	0.000151657	48	8.74592e-05	28	0.000130216	46	8.0789e-05	50	0.000145945	57	0.000163115	44	0.000150804	52	9.80671e-05	37	0.00010616	39	0.000101647	41	0.000181381
enzyme_ec	1.1.1.27	oxidoreductases acting on the ch-oh group of donors with nad+ or nadp+ as acceptor l-lactate dehydrogenase	0.000706483	81	0.000545316	120	0.000794316	118	0.000236028	52	0.00118464	115	0.00070459	115	0.000634367	116	0.00110942	126	0.000855596	91	0.000235936	51	0.000661984	110	0.000681966	113	0.000808043	125	0.000905516	129	0.000940813	98	0.000899009	141	0.000532713	106	0.000784349	146	0.000376567	87	0.000435471	88	0.000632373	92	0.000650596	114	0.000655983	112	0.00130229
enzyme_ec	1.1.1.271	oxidoreductases acting on the ch-oh group of donors with nad+ or nadp+ as acceptor gdp-l-fucose synthase	0.000233052	31	6.96022e-05	26	0.000107213	25	3.45198e-06	1	4.04739e-05	13	3.8272e-05	11	0.000103657	32	2.94367e-05	9	9.97148e-05	17	6.82168e-05	18	4.52194e-05	13	4.64314e-05	17	9.23718e-05	26	1.84958e-05	7	8.61104e-06	3	6.41093e-05	20	8.41498e-05	35	0.000126204	22	7.01858e-05	16	3.103e-05	11	5.11319e-05	11	0.000112528	25	9.26531e-05	26	5.81539e-05
enzyme_ec	1.1.1.28	oxidoreductases acting on the ch-oh group of donors with nad+ or nadp+ as acceptor d-lactate dehydrogenase	0.000292126	46	0.000269443	75	0.000300409	63	0.000198943	25	0.000517398	73	0.000506186	59	0.000232841	54	0.000253221	47	0.000160573	27	0.000139049	28	5.44834e-05	22	0.00059875	76	0.000213769	47	0.000476743	67	0.000450611	49	0.000152815	31	0.000488797	74	0.000262541	56	0.000101493	27	0.000147879	42	0.000181716	38	0.000168242	27	0.000408607	71	0.000518569
enzyme_ec	1.1.1.281	oxidoreductases acting on the ch-oh group of donors with nad+ or nadp+ as acceptor gdp-4-dehydro-6-deoxy-d-mannose reductase	3.46675e-06	4							5.77612e-07	1			7.84357e-07	1	1.19826e-05	2	1.6466e-05	2			3.45833e-06	2	2.34764e-05	1			2.75555e-06	4			2.28323e-06	2	1.70462e-06	3	1.42945e-06	1	2.30696e-06	3	2.70943e-06	2					8.31504e-07	1	5.44899e-07
enzyme_ec	1.1.1.282	oxidoreductases acting on the ch-oh group of donors with nad+ or nadp+ as acceptor quinate/shikimate dehydrogenase [nad(p)+]	0.000262716	52	0.0002983	88	0.000184143	47	9.58961e-05	23	0.000780826	111	0.000418417	71	0.000594801	97	0.000321194	65	0.000432266	71	0.000255501	50	0.000404771	79	0.000142942	40	0.000106905	36	0.000375186	73	9.94878e-05	20	0.000199804	45	0.000226237	59	0.000293562	69	0.000268168	58	0.000660946	105	0.000169363	44	0.000413268	76	0.000219253	64	0.00043465
enzyme_ec	1.1.1.283	oxidoreductases acting on the ch-oh group of donors with nad+ or nadp+ as acceptor methylglyoxal reductase (nadph)	2.22523e-05	7	1.61427e-05	5					2.76602e-05	7	1.75196e-05	5	3.00111e-06	3	6.08976e-06	3	1.54578e-05	5			6.50497e-07	1	5.18738e-06	2	1.29969e-06	1	3.26066e-06	3					4.6927e-05	13			8.99868e-07	1	3.72381e-06	3	3.33788e-06	2	4.08389e-06	3	1.94816e-05	5	9.42686e-06
enzyme_ec	1.1.1.284	oxidoreductases acting on the ch-oh group of donors with nad+ or nadp+ as acceptor s-(hydroxymethyl)glutathione dehydrogenase	1.72572e-06	1	1.27391e-06	1	3.15424e-06	2			1.58048e-06	1	2.13887e-06	1	2.74004e-06	1			0	0	3.54273e-05	7	1.04854e-05	4	0.000649935	26			5.43075e-06	3	5.61269e-05	5			3.92717e-06	3			9.969e-06	3	5.07701e-06	3	2.14696e-06	1	1.23848e-05	3	1.27897e-05	4
enzyme_ec	1.1.1.289	oxidoreductases acting on the ch-oh group of donors with nad+ or nadp+ as acceptor sorbose reductase	6.93586e-06	2	4.23573e-06	2					2.5039e-05	6	2.96917e-06	1	8.12976e-06	3									1.96389e-05	5	4.28391e-06	2			1.41298e-05	4	4.47039e-06	1	5.504e-06	1	0	0	1.92887e-06	1	9.61645e-07	1			1.43854e-05	4	8.56528e-06	4
enzyme_ec	1.1.1.29	oxidoreductases acting on the ch-oh group of donors with nad+ or nadp+ as acceptor glycerate dehydrogenase	0.000158701	56	0.000125026	44	3.66436e-05	15	6.451e-05	17	9.32743e-05	34	0.00016905	51	0.000142553	47	0.000103023	33	0.000137983	42	5.99976e-05	27	7.77163e-05	36	0.000108692	35	0.00012674	47	8.69146e-05	34	2.14905e-05	8	0.000106823	25	0.00012236	65	0.000108493	57	0.000108668	34	6.00241e-05	24	5.48116e-05	25	9.19967e-05	32	0.000107627	48	3.6564e-05
enzyme_ec	1.1.1.291	oxidoreductases acting on the ch-oh group of donors with nad+ or nadp+ as acceptor 2-hydroxymethylglutarate dehydrogenase					2.62022e-06	2	1.02515e-05	3			5.47664e-07	1	2.71263e-07	1					2.87182e-06	2	5.56565e-07	1			7.50823e-07	1			5.54357e-06	2			2.1857e-06	2			4.75596e-06	3									1.09367e-06
enzyme_ec	1.1.1.3	oxidoreductases acting on the ch-oh group of donors with nad+ or nadp+ as acceptor homoserine dehydrogenase	0.000390089	147	0.000538092	211	0.00049016	169	0.000115727	43	0.00048603	172	0.000457908	154	0.000562944	190	0.000521601	149	0.000350228	113	0.000115478	54	0.000324387	121	0.000347027	133	0.000701726	224	0.000458303	152	0.000326702	76	0.000519502	195	0.000504094	214	0.000333504	147	0.000322945	137	0.000451133	143	0.000359033	147	0.000339874	121	0.000453736	180	0.000479892
enzyme_ec	1.1.1.302	oxidoreductases acting on the ch-oh group of donors with nad+ or nadp+ as acceptor 2,5-diamino-6-(ribosylamino)-4(3h)-pyrimidinone 5â€²-phosphate reductase	2.43063e-06	1	5.45534e-06	4					3.45133e-06	2	4.75498e-06	2					5.84563e-06	2			5.46602e-07	1													1.04323e-06	1			1.71551e-06	1							8.98148e-07
enzyme_ec	1.1.1.303	oxidoreductases acting on the ch-oh group of donors with nad+ or nadp+ as acceptor diacetyl reductase [(r)-acetoin forming]	9.53616e-06	3	2.22926e-05	8	3.66444e-05	6	2.61606e-06	2	5.47951e-07	1	1.18525e-06	1	1.3101e-05	5	1.93794e-05	5	1.65839e-05	5	7.12485e-06	4	3.3847e-05	8			1.60771e-06	2	1.58271e-05	4	9.76765e-06	5	1.97957e-06	2			1.00163e-06	1	2.40624e-05	11	1.47914e-05	8	6.10614e-06	5	1.90406e-05	6			0
enzyme_ec	1.1.1.304	oxidoreductases acting on the ch-oh group of donors with nad+ or nadp+ as acceptor diacetyl reductase [(s)-acetoin forming]	0.000214461	42	0.000154549	52	0.000108051	27	0.00016094	23	0.000261886	53	0.000338859	63	0.000139724	48	0.000233819	37	0.000159259	32	8.26643e-05	16	6.70383e-05	29	0.000139175	30	0.000339212	45	0.000114508	32	0.000359485	49	0.000263946	44	0.000255337	58	0.000292192	78	5.41699e-05	20	0.000498729	55	9.99347e-05	28	0.00011332	21	0.000207982	53	8.09244e-05
enzyme_ec	1.1.1.31	oxidoreductases acting on the ch-oh group of donors with nad+ or nadp+ as acceptor 3-hydroxyisobutyrate dehydrogenase	2.67946e-06	3	1.57487e-05	12	1.25802e-05	7	4.1002e-06	3	2.18251e-05	9	4.14616e-05	16	1.79127e-05	9	9.92783e-06	4	3.02811e-05	16	8.80631e-06	6	2.74197e-06	4	1.37625e-05	8	2.87541e-05	17	8.58263e-06	4	1.94073e-05	7	3.80992e-06	3	7.64337e-06	6	1.25307e-05	6	3.88906e-05	12	2.10127e-05	9	3.68933e-05	12	1.07436e-05	7	4.17621e-06	4	2.50417e-05
enzyme_ec	1.1.1.335	oxidoreductases acting on the ch-oh group of donors with nad+ or nadp+ as acceptor udp-n-acetyl-2-amino-2-deoxyglucuronate dehydrogenase	0.000178441	46	0.000194603	54	0.000102039	32	7.61308e-05	21	0.000201744	40	4.68541e-05	18	0.000300817	48	0.000151303	32	0.00159956	82	0.000106428	36	0.000243605	52	0.000101865	30	7.81914e-05	33	0.000323933	50	0.000303497	43	1.94266e-05	14	9.33173e-05	38	9.62708e-05	23	0.00128809	89	0.000224203	59	0.000235225	51	0.000560287	73	0.000198372	58	8.73164e-05
enzyme_ec	1.1.1.336	oxidoreductases acting on the ch-oh group of donors with nad+ or nadp+ as acceptor udp-n-acetyl-d-mannosamine dehydrogenase	6.17451e-05	15	3.16016e-05	18	1.40076e-05	11	1.20907e-05	7	7.16414e-06	3	3.01522e-05	10	8.32442e-06	3	5.04732e-06	3	5.88948e-05	14	2.64716e-05	11	2.44835e-05	11	1.41464e-05	3	4.80386e-05	15	1.61509e-05	7	2.02609e-05	6	2.00507e-05	11	2.39665e-05	7	1.36369e-05	10	3.19293e-05	7	6.51933e-05	16	8.48395e-05	19	4.78688e-05	15	1.62631e-05	8	1.57799e-06
enzyme_ec	1.1.1.337	oxidoreductases acting on the ch-oh group of donors with nad+ or nadp+ as acceptor l-2-hydroxycarboxylate dehydrogenase (nad+)	0.000146912	17	4.56852e-05	16	9.52917e-05	24	8.60332e-05	21	0.000190784	27	3.36384e-05	10	9.98527e-05	27	0.00015491	30	0.000212147	29	8.51131e-05	24	1.38383e-05	9	0.000169504	32	8.94339e-05	23	0.000113174	17	8.14981e-05	20	0.000102349	24	0.000226522	39	8.68724e-05	22	3.20231e-05	14	6.8672e-05	24	9.47371e-05	27	3.00956e-05	13	0.000109962	24	0.000110947
enzyme_ec	1.1.1.339	oxidoreductases acting on the ch-oh group of donors with nad+ or nadp+ as acceptor dtdp-6-deoxy-l-talose 4-dehydrogenase (nad+)	9.75973e-06	4	3.50565e-07	1					2.34617e-06	2			4.64971e-05	11	8.3934e-06	4	1.44191e-05	3			3.62385e-06	2			5.79615e-05	16			0	0			1.41834e-05	8			1.49247e-06	1	7.16442e-06	5	2.73797e-05	7	6.90153e-05	10	9.86947e-06	4	1.90755e-06
enzyme_ec	1.1.1.34	oxidoreductases acting on the ch-oh group of donors with nad+ or nadp+ as acceptor hydroxymethylglutaryl-coa reductase (nadph)																			6.20967e-06	2	5.06574e-07	1					3.74723e-06	1	1.38335e-06	1									6.67465e-07	1
enzyme_ec	1.1.1.342	oxidoreductases acting on the ch-oh group of donors with nad+ or nadp+ as acceptor cdp-paratose synthase			2.17101e-05	11	9.77572e-06	4					8.24942e-06	4	2.68702e-05	7							1.56505e-06	1			1.08348e-05	3	1.72675e-05	5	5.8967e-05	8	6.8626e-06	3	5.56738e-07	1	9.60906e-06	5			1.53464e-05	5	1.03061e-06	2	1.55421e-06	2			5.30945e-06
enzyme_ec	1.1.1.343	oxidoreductases acting on the ch-oh group of donors with nad+ or nadp+ as acceptor phosphogluconate dehydrogenase (nad+-dependent, decarboxylating)	4.62739e-05	12	2.03392e-05	12	0.000242427	33	1.81595e-05	6	0.000172569	40	7.02973e-05	22	6.0927e-05	21	0.000125797	29	0.000114117	26	0.000218968	27	0.000167466	47	5.95642e-05	15	0.000202851	46	0.000203472	49	0.000243143	21	0.000118661	39	8.11252e-05	38	5.23558e-05	26	0.000119718	31	3.45778e-05	19	6.49313e-05	24	7.0087e-05	20	0.000112883	27	0.00026067
enzyme_ec	1.1.1.346	oxidoreductases acting on the ch-oh group of donors with nad+ or nadp+ as acceptor 2,5-didehydrogluconate reductase (2-dehydro-l-gulonate-forming)	2.6792e-05	17	2.81257e-05	24	4.82383e-05	21	4.67863e-06	2	0.000132013	48	6.5123e-05	24	6.4342e-05	30	6.05999e-05	20	9.72281e-05	30	1.74767e-05	9	8.44011e-06	5	7.33142e-05	19	3.82732e-05	24	0.000105459	37	8.36086e-07	1	4.70032e-05	25	3.69069e-06	4	4.91105e-05	27	6.19273e-06	4	7.45432e-05	27	3.76359e-05	15	2.76083e-05	15	7.57567e-06	7	4.89041e-05
enzyme_ec	1.1.1.35	oxidoreductases acting on the ch-oh group of donors with nad+ or nadp+ as acceptor 3-hydroxyacyl-coa dehydrogenase	3.37142e-07	1	1.5855e-06	2	3.42272e-05	12	8.36879e-07	1	2.98882e-07	1	3.21286e-06	4			9.90808e-06	8			1.67847e-05	9	5.46472e-06	4	0.000122265	24	4.16554e-06	3			3.38586e-06	3	3.20724e-05	15					8.90016e-06	8	3.03744e-07	1	7.0537e-07	1	2.63858e-05	15	6.25585e-06	6	1.22073e-05
enzyme_ec	1.1.1.350	oxidoreductases acting on the ch-oh group of donors with nad+ or nadp+ as acceptor ureidoglycolate dehydrogenase (nad+)	4.87073e-06	1											7.71816e-06	3	1.66155e-06	1	1.90206e-06	1			1.48428e-06	1			1.0783e-06	1	2.45119e-06	1			6.61027e-06	4	1.14473e-06	1	4.90411e-06	2			1.20054e-05	5	2.3317e-06	1	2.12697e-06	2	1.92825e-06	1	6.56813e-06
enzyme_ec	1.1.1.363	oxidoreductases acting on the ch-oh group of donors with nad+ or nadp+ as acceptor glucose-6-phosphate dehydrogenase [nad(p)+]	1.67225e-05	8	4.67115e-07	1	3.94619e-07	1	4.45965e-06	3	5.1969e-05	20	9.35873e-06	7	2.22306e-05	11	2.37254e-05	13	5.27247e-05	23	4.5597e-05	11	8.64638e-06	6	1.63526e-05	10	0.000111581	26	1.92742e-05	12	3.61792e-06	2	1.81774e-05	15	2.03941e-05	15	8.78217e-07	1	4.65156e-05	14	1.40379e-05	3	3.4687e-06	4	6.38796e-06	5	1.18261e-05	3	2.76985e-05
enzyme_ec	1.1.1.369	oxidoreductases acting on the ch-oh group of donors with nad+ or nadp+ as acceptor d-chiro-inositol 1-dehydrogenase	0.000495789	70	0.0010858	134	0.00064053	71	0.000280321	46	0.000218355	50	0.000493056	89	0.000637212	91	0.000244527	45	0.0017069	118	0.000529483	103	0.000624122	86	0.000604191	68	0.000370177	63	0.000757802	97	0.000524087	71	0.000511077	95	0.000425777	85	0.00027371	50	0.000515693	69	0.000362323	65	0.000675585	101	0.000359693	66	0.000415803	72	0.00057342
enzyme_ec	1.1.1.37	oxidoreductases acting on the ch-oh group of donors with nad+ or nadp+ as acceptor malate dehydrogenase	0.00207721	137	0.00192318	153	0.0021631	126	0.00169129	146	0.00117459	101	0.00204496	146	0.00382594	173	0.00107131	107	0.0018889	117	0.00231892	188	0.00155743	140	0.00282246	164	0.00210657	138	0.0021769	146	0.00168491	149	0.00138064	154	0.00154203	116	0.00124048	130	0.00198411	164	0.00153496	162	0.00152206	134	0.00346319	174	0.00266553	211	0.00227235
enzyme_ec	1.1.1.370	oxidoreductases acting on the ch-oh group of donors with nad+ or nadp+ as acceptor scyllo-inositol 2-dehydrogenase (nad+)	8.12836e-06	3	0.000294463	27	3.09568e-05	8	0.000179991	24			9.44112e-05	16	4.66963e-06	4	9.00595e-06	5	0.000673041	22	4.95705e-05	15	9.3743e-05	17	4.18596e-05	10	5.0235e-05	16			3.29906e-05	8	7.51204e-06	4	8.46182e-06	4	2.30725e-05	9	2.1655e-05	11	1.50704e-05	5	3.26865e-06	1	7.08389e-06	3	3.0943e-06	3	4.33668e-05
enzyme_ec	1.1.1.371	oxidoreductases acting on the ch-oh group of donors with nad+ or nadp+ as acceptor scyllo-inositol 2-dehydrogenase (nadp+)	4.43238e-05	23	0.000310083	56	0.000305828	40	7.41252e-05	22	0.00019454	35	8.11612e-05	26	0.000223617	30	1.05007e-05	5	0.000437325	40	0.000174482	42	9.97384e-05	23	5.38697e-05	17	2.93449e-05	16	0.00022628	41	3.65695e-05	12	0.000104556	12	0.000121245	40	8.04493e-05	23	0.000225945	55	0.000157251	44	0.000123779	29	0.000176831	36	0.000118693	31	0.000129878
enzyme_ec	1.1.1.374	oxidoreductases acting on the ch-oh group of donors with nad+ or nadp+ as acceptor udp-n-acetylglucosamine 3-dehydrogenase	0.000332017	59	0.000299226	70	0.000101077	32	0.000279721	62	0.000209392	41	0.000233142	51	0.000156126	51	7.40881e-05	29	0.000367853	64	0.000390571	86	0.000132527	38	6.24797e-05	16	0.000114081	40	7.36515e-05	25	0.000264419	67	4.33679e-05	25	2.95451e-05	19	5.10486e-05	25	0.000228578	68	0.000135219	47	0.000205737	51	4.71566e-05	24	8.3303e-05	25	0.000344369
enzyme_ec	1.1.1.38	oxidoreductases acting on the ch-oh group of donors with nad+ or nadp+ as acceptor malate dehydrogenase (oxaloacetate-decarboxylating)	0.00078541	145	0.000867033	166	0.00114478	161	0.000441122	90	0.000591312	127	0.00107157	178	0.000749186	138	0.000582565	116	0.00065509	115	0.000350287	93	0.000326849	98	0.000869464	146	0.000853578	176	0.000782588	125	0.000663478	92	0.000577719	134	0.000838645	176	0.00088601	155	0.000789975	152	0.000517428	144	0.000522905	109	0.000742092	152	0.000764252	155	0.000977724
enzyme_ec	1.1.1.380	oxidoreductases acting on the ch-oh group of donors with nad+ or nadp+ as acceptor l-gulonate 5-dehydrogenase	4.03277e-05	9	9.69568e-06	5	3.65137e-06	2	1.85466e-05	5	2.45043e-05	10	0	0	9.85262e-06	5	0.00015323	10	0.000104397	17	4.97385e-06	2	8.94357e-06	3	7.62633e-05	13	2.58091e-05	10	0.000142269	21	2.73926e-05	6	4.7371e-06	3	2.86644e-06	1	1.04175e-05	6	4.71676e-05	18	3.38981e-05	9	2.36172e-05	6	1.5248e-05	5	3.46783e-05	9	2.58367e-05
enzyme_ec	1.1.1.381	oxidoreductases acting on the ch-oh group of donors with nad+ or nadp+ as acceptor 3-hydroxy acid dehydrogenase	4.25185e-05	12	0.000115819	16	6.92953e-05	14	1.28481e-05	4	4.72273e-05	11	5.66962e-05	10	6.1274e-05	12	9.52268e-06	3	2.47938e-05	6	5.49129e-05	14	2.4354e-05	6	2.62258e-05	7	8.76596e-05	15	2.05068e-05	5	3.53805e-05	8	3.29785e-05	12	6.8727e-05	13	2.55949e-05	8	4.58174e-05	13	4.01446e-05	14	3.5675e-05	11	8.81297e-05	19	5.6554e-05	16	9.88934e-05
enzyme_ec	1.1.1.384	oxidoreductases acting on the ch-oh group of donors with nad+ or nadp+ as acceptor dtdp-3,4-didehydro-2,6-dideoxy-Î±-d-glucose 3-reductase	1.35381e-06	1									2.08638e-06	2																					1.44101e-06	2									4.57094e-06	2	1.31483e-06	1	8.49547e-07
enzyme_ec	1.1.1.392	oxidoreductases acting on the ch-oh group of donors with nad+ or nadp+ as acceptor 3Î±-hydroxycholanate dehydrogenase (nadp+)	0.000115933	21	1.558e-05	10	3.58093e-06	3	7.87872e-05	9	0.000116108	11	3.62493e-05	13	4.88993e-05	14	1.20859e-05	5	2.72021e-05	9	2.06992e-05	5	1.56023e-05	5	2.21399e-05	7	5.42079e-05	16	1.64668e-05	6	3.3232e-05	8	2.78442e-05	6	6.72074e-05	17	1.6401e-05	7	2.18475e-05	8	3.88765e-05	19	1.24492e-05	8	1.21365e-05	5	5.39496e-05	20	2.66564e-05
enzyme_ec	1.1.1.393	oxidoreductases acting on the ch-oh group of donors with nad+ or nadp+ as acceptor 3Î²-hydroxycholanate 3-dehydrogenase (nadp+)	4.07896e-05	9
enzyme_ec	1.1.1.399	oxidoreductases acting on the ch-oh group of donors with nad+ or nadp+ as acceptor 2-oxoglutarate reductase	0.00157204	250	0.00143135	330	0.000967478	234	0.00197326	213	0.00140681	221	0.0014092	280	0.00163369	292	0.00140833	255	0.00107404	191	0.00137954	230	0.00139921	266	0.000899951	190	0.00137871	354	0.00141338	223	0.0016555	181	0.00180618	333	0.00144556	334	0.00130077	257	0.0014752	289	0.00192561	325	0.00156703	327	0.00139767	245	0.00138919	307	0.0011072
enzyme_ec	1.1.1.4	oxidoreductases acting on the ch-oh group of donors with nad+ or nadp+ as acceptor (r,r)-butanediol dehydrogenase	9.53616e-06	3	2.22926e-05	8	3.66444e-05	6	2.61606e-06	2	5.47951e-07	1	1.18525e-06	1	1.3101e-05	5	1.93794e-05	5	1.65839e-05	5	7.12485e-06	4	3.3847e-05	8			1.60771e-06	2	1.58271e-05	4	9.76765e-06	5	1.97957e-06	2			1.00163e-06	1	2.40624e-05	11	1.47914e-05	8	6.10614e-06	5	1.90406e-05	6			0
enzyme_ec	1.1.1.40	oxidoreductases acting on the ch-oh group of donors with nad+ or nadp+ as acceptor malate dehydrogenase (oxaloacetate-decarboxylating) (nadp+)	0.000114675	26	0.000103593	31	3.41518e-05	10	0.000106559	21	7.23506e-05	19	0.000119915	33	0.000253196	43	3.35555e-05	13	0.000111748	23	3.33653e-05	11	5.1725e-05	15	7.48234e-05	21	2.55658e-05	6	3.25324e-05	13	6.80832e-06	4	0.000106897	27	0.000136642	33	3.42976e-05	17	6.30982e-05	21	1.3186e-05	9	4.37563e-05	14	1.90913e-05	8	0.000158063	43	6.91465e-05
enzyme_ec	1.1.1.405	oxidoreductases acting on the ch-oh group of donors with nad+ or nadp+ as acceptor ribitol-5-phosphate 2-dehydrogenase (nadp+)					7.85752e-06	5	6.11942e-06	2	0	0	7.64189e-07	1	3.4447e-06	3	4.50365e-06	3	1.51471e-05	7							6.8047e-07	1	1.17346e-06	1			3.1822e-06	2	1.98922e-06	2									6.03637e-07	1	1.88813e-06	2	7.96499e-06
enzyme_ec	1.1.1.408	oxidoreductases acting on the ch-oh group of donors with nad+ or nadp+ as acceptor 4-phospho-d-threonate 3-dehydrogenase	8.76659e-06	7	3.82596e-05	19	5.30381e-06	3			1.67279e-05	9	2.39119e-05	11	4.01143e-05	15	2.29855e-05	8	3.12723e-05	11	3.24505e-05	10	6.82566e-06	4	7.79161e-05	13	7.35305e-06	5	1.90538e-05	9	5.17054e-06	3	2.65794e-05	11	2.37691e-05	15	2.75091e-05	15	1.95046e-05	8	1.06977e-05	10	1.07239e-05	6	6.00381e-05	16	9.5606e-06	8	2.7035e-05
enzyme_ec	1.1.1.409	oxidoreductases acting on the ch-oh group of donors with nad+ or nadp+ as acceptor 4-phospho-d-erythronate 3-dehydrogenase	8.76659e-06	7	3.82596e-05	19	5.30381e-06	3			1.67279e-05	9	2.39119e-05	11	4.01143e-05	15	2.29855e-05	8	3.12723e-05	11	3.24505e-05	10	6.82566e-06	4	7.79161e-05	13	7.35305e-06	5	1.90538e-05	9	5.17054e-06	3	2.65794e-05	11	2.37691e-05	15	2.75091e-05	15	1.95046e-05	8	1.06977e-05	10	1.07239e-05	6	6.00381e-05	16	9.5606e-06	8	2.7035e-05
enzyme_ec	1.1.1.41	oxidoreductases acting on the ch-oh group of donors with nad+ or nadp+ as acceptor isocitrate dehydrogenase (nad+)	6.19286e-05	23	7.63009e-05	35	2.15124e-05	11	8.94471e-06	7	3.72466e-05	15	5.75488e-05	25	6.3251e-05	21	4.04816e-05	13	0.000115885	22	2.00791e-05	10	2.66609e-05	15	6.10607e-05	20	2.8521e-05	18	3.09567e-05	17	1.9358e-05	7	4.51095e-05	22	8.99255e-05	34	3.37371e-05	19	9.9377e-05	30	2.65669e-05	18	4.12108e-05	17	2.74109e-05	14	5.47081e-05	18	5.42804e-05
enzyme_ec	1.1.1.414	oxidoreductases acting on the ch-oh group of donors with nad+ or nadp+ as acceptor l-galactonate 5-dehydrogenase	6.64369e-05	19	4.11781e-05	20	1.08233e-05	6	3.00493e-05	11	3.84741e-05	18	1.63644e-05	11	6.47711e-05	21	3.44298e-05	15	4.04825e-05	12	6.47375e-05	21	6.72441e-05	20	5.84458e-05	20	2.52309e-05	9	4.88857e-05	17	0.000125783	25	5.45588e-05	27	8.50338e-05	28	2.64776e-05	10	5.85497e-05	20	1.51858e-05	5	3.98855e-05	15	2.96072e-05	12	5.01792e-05	25	1.14653e-05
enzyme_ec	1.1.1.42	oxidoreductases acting on the ch-oh group of donors with nad+ or nadp+ as acceptor isocitrate dehydrogenase (nadp+)	0.000611408	116	0.000770313	176	0.000980295	166	0.000611979	94	0.000696955	137	0.000592802	136	0.000964095	197	0.00102198	171	0.000459508	111	0.000442305	80	0.000790122	165	0.000462925	99	0.000859055	183	0.000745972	143	0.0010433	119	0.000999304	196	0.000589244	171	0.000658228	149	0.000736797	154	0.000814094	164	0.000825076	163	0.000808315	158	0.000630403	142	0.00071861
enzyme_ec	1.1.1.425	oxidoreductases acting on the ch-oh group of donors with nad+ or nadp+ as acceptor levoglucosan dehydrogenase	0.000150025	20	0.00046361	58	2.28653e-05	5	2.482e-06	2	0.000306826	20	0.00011387	12	0.00020704	15	0.000184499	17	0.000256852	11			0.000109272	12	1.43905e-06	1	4.79607e-06	1	0.00010745	15	2.02459e-05	2			6.72875e-05	21	0.000110471	13	2.4087e-05	5	7.09721e-05	9			8.03835e-05	9	9.00504e-06	5	0.000200293
enzyme_ec	1.1.1.426	oxidoreductases acting on the ch-oh group of donors with nad+ or nadp+ as acceptor udp-n-acetyl-Î±-d-quinovosamine dehydrogenase	7.11769e-07	1																											1.30142e-05	3			1.01163e-06	1
enzyme_ec	1.1.1.432	oxidoreductases acting on the ch-oh group of donors with nad+ or nadp+ as acceptor 6-dehydroglucose reductase	1.79572e-05	9	1.28445e-05	8	5.60852e-06	5	0	0	2.50182e-05	9	5.88702e-06	4	3.50759e-06	4	3.22455e-05	11	4.27555e-05	12	2.18479e-05	8	1.80083e-05	7	1.6767e-05	7	7.69684e-06	7	2.55545e-05	7	1.10767e-05	4	7.25742e-06	5	3.66961e-05	16	3.70212e-05	8	1.21316e-06	2	2.65063e-05	16	4.96005e-06	3	1.37663e-05	3	8.48572e-06	5	5.88747e-06
enzyme_ec	1.1.1.433	oxidoreductases acting on the ch-oh group of donors with nad+ or nadp+ as acceptor sulfoacetaldehyde reductase (nadh)	5.14229e-05	13	7.28378e-05	13	1.08182e-06	1	6.38867e-05	9	5.39149e-05	14	4.59336e-05	8	4.51105e-05	11	1.11348e-05	5	2.92578e-05	6	5.86454e-05	10	5.40469e-05	19	5.75064e-07	1	5.77286e-06	4	4.6322e-05	14	1.84737e-05	2	5.51946e-05	15	6.05998e-05	20	3.31604e-05	10	3.03613e-05	10	4.43035e-05	16	4.26746e-05	9	2.55514e-05	9	8.89013e-07	1	4.78142e-05
enzyme_ec	1.1.1.44	oxidoreductases acting on the ch-oh group of donors with nad+ or nadp+ as acceptor phosphogluconate dehydrogenase (nadp+-dependent, decarboxylating)	4.62739e-05	12	2.03392e-05	12	0.000242427	33	1.81595e-05	6	0.000172569	40	7.02973e-05	22	6.0927e-05	21	0.000125797	29	0.000114117	26	0.000218968	27	0.000167466	47	5.95642e-05	15	0.000202851	46	0.000203472	49	0.000243143	21	0.000118661	39	8.11252e-05	38	5.23558e-05	26	0.000119718	31	3.45778e-05	19	6.49313e-05	24	7.0087e-05	20	0.000112883	27	0.00026067
enzyme_ec	1.1.1.47	oxidoreductases acting on the ch-oh group of donors with nad+ or nadp+ as acceptor glucose 1-dehydrogenase [nad(p)+]	1.61268e-05	5	6.1296e-05	14	9.03805e-05	8	8.47605e-06	5	9.09038e-05	28	0.000152337	42	6.90241e-05	19	0.000134073	15	1.35941e-05	11	5.03027e-05	10	0.000154756	14	1.2055e-06	1	1.47139e-05	8	4.5107e-05	9	1.38957e-05	7	1.74387e-05	8	3.7675e-05	16	2.68529e-06	3	0.000274931	32	0.000153069	25	4.04462e-05	13	2.8205e-05	11	0.000302164	27	0.000171911
enzyme_ec	1.1.1.49	oxidoreductases acting on the ch-oh group of donors with nad+ or nadp+ as acceptor glucose-6-phosphate dehydrogenase (nadp+)	1.67225e-05	8	4.67115e-07	1	3.94619e-07	1	4.45965e-06	3	5.1969e-05	20	9.35873e-06	7	2.22306e-05	11	2.37254e-05	13	5.27247e-05	23	4.5597e-05	11	8.64638e-06	6	1.63526e-05	10	0.000112305	27	1.92742e-05	12	3.61792e-06	2	1.81774e-05	15	2.03941e-05	15	8.78217e-07	1	4.65156e-05	14	1.40379e-05	3	3.4687e-06	4	6.38796e-06	5	1.18261e-05	3	2.76985e-05
enzyme_ec	1.1.1.52	oxidoreductases acting on the ch-oh group of donors with nad+ or nadp+ as acceptor 3Î±-hydroxycholanate dehydrogenase (nad+)	4.05271e-07	1			1.21406e-05	5			1.4942e-06	1	3.41641e-06	2			6.2165e-06	3	4.4509e-06	3	1.12889e-06	1			1.55947e-05	4	2.08521e-05	8			1.92493e-06	1	5.72494e-06	3					2.03685e-06	1			1.9587e-06	1			3.03296e-05	10
enzyme_ec	1.1.1.57	oxidoreductases acting on the ch-oh group of donors with nad+ or nadp+ as acceptor fructuronate reductase	0.000759519	99	0.000592266	106	0.000286259	60	0.000141471	29	0.000864615	113	0.000482799	97	0.000437953	77	0.000660075	85	0.000768201	68	0.000128108	22	0.000385022	77	0.000478844	73	0.00034302	91	0.000506509	106	0.000244903	43	0.000373369	70	0.000267877	93	0.000480103	104	0.00047669	71	0.00039681	76	0.000408399	71	0.000338326	60	0.000393121	97	0.000560818
enzyme_ec	1.1.1.58	oxidoreductases acting on the ch-oh group of donors with nad+ or nadp+ as acceptor tagaturonate reductase	0.000926513	120	0.00158309	184	0.00098628	114	0.000363162	63	0.000864026	129	0.00100628	124	0.00119152	119	0.00070589	96	0.000915505	105	0.000200528	46	0.00114154	166	0.00139068	165	0.00203994	228	0.00135619	148	0.00052911	59	0.00103825	149	0.00110994	183	0.000904134	146	0.00108771	127	0.000764982	104	0.000936158	123	0.00110559	153	0.00110377	178	0.000766671
enzyme_ec	1.1.1.6	oxidoreductases acting on the ch-oh group of donors with nad+ or nadp+ as acceptor glycerol dehydrogenase	0.000350137	46	0.000201189	43	0.000111022	28	0.000118299	23	0.000585865	68	0.000243122	56	0.000243747	44	0.000151239	37	0.00020748	39	0.000564506	65	0.000140168	39	0.000250729	49	7.62636e-05	31	0.000295186	57	0.000326889	38	0.00027243	43	0.000268491	69	0.000162831	39	0.000152371	39	0.000268061	62	0.000287353	59	0.000155654	39	0.000129826	48	0.00028091
enzyme_ec	1.1.1.60	oxidoreductases acting on the ch-oh group of donors with nad+ or nadp+ as acceptor 2-hydroxy-3-oxopropionate reductase	9.31349e-05	22	0.000188527	46	0.000122273	27	5.32233e-05	21	9.07568e-05	32	7.52615e-05	27	0.00012421	33	6.60825e-05	20	9.8666e-05	28	2.68747e-05	15	0.00013222	27	0.000142811	28	0.000137037	37	0.00010734	26	1.11778e-05	6	0.00019182	34	0.000398451	55	5.12998e-05	28	3.95926e-05	18	9.70605e-05	39	8.41063e-05	28	0.000104556	25	8.32654e-05	28	4.66458e-05
enzyme_ec	1.1.1.61	oxidoreductases acting on the ch-oh group of donors with nad+ or nadp+ as acceptor 4-hydroxybutyrate dehydrogenase	8.5554e-07	1									7.15527e-07	1			1.65773e-06	2	3.98133e-06	2																							2.23235e-06	1					3.74054e-07
enzyme_ec	1.1.1.69	oxidoreductases acting on the ch-oh group of donors with nad+ or nadp+ as acceptor gluconate 5-dehydrogenase	0.00136907	106	0.0011684	110	0.000678374	72	0.000456078	61	0.000871467	86	0.00111381	109	0.0015207	121	0.00103103	77	0.000914271	84	0.000486343	68	0.00124139	121	0.00192414	142	0.00199287	149	0.00156883	119	0.000485948	57	0.00128909	102	0.00136986	140	0.00110381	119	0.00193501	147	0.000791835	90	0.00127355	125	0.00133009	117	0.00131636	122	0.000704648
enzyme_ec	1.1.1.76	oxidoreductases acting on the ch-oh group of donors with nad+ or nadp+ as acceptor (s,s)-butanediol dehydrogenase	0.000214461	42	0.000154549	52	0.000108051	27	0.00016094	23	0.000261886	53	0.000338859	63	0.000139724	48	0.000233819	37	0.000159259	32	8.26643e-05	16	6.70383e-05	29	0.000139175	30	0.000339212	45	0.000114508	32	0.000359485	49	0.000263946	44	0.000255337	58	0.000292192	78	5.41699e-05	20	0.000498729	55	9.99347e-05	28	0.00011332	21	0.000207982	53	8.09244e-05
enzyme_ec	1.1.1.77	oxidoreductases acting on the ch-oh group of donors with nad+ or nadp+ as acceptor lactaldehyde reductase	0.00145173	173	0.0016882	242	0.00156287	221	0.00101413	141	0.00134578	173	0.00134448	222	0.0012641	163	0.0014081	155	0.0018349	193	0.000485426	101	0.00195214	258	0.00191683	223	0.00207616	285	0.00186125	225	0.00104332	94	0.00124335	173	0.00179732	266	0.00173325	271	0.00150197	214	0.00136966	196	0.00139431	198	0.00201952	229	0.00147503	221	0.00141629
enzyme_ec	1.1.1.79	oxidoreductases acting on the ch-oh group of donors with nad+ or nadp+ as acceptor glyoxylate reductase (nadp+)			1.5052e-06	2	4.9025e-05	6	1.38229e-05	6	3.04639e-06	3			2.30633e-06	4	0.000105713	11	3.13414e-06	3	2.42038e-06	2	4.61441e-06	1			0.000150478	15			0.000190003	11	1.04195e-05	4	1.38375e-06	2	4.98638e-05	11	2.45159e-06	3	1.687e-06	2	1.85952e-06	3	6.21954e-06	4			5.15298e-05
enzyme_ec	1.1.1.80	oxidoreductases acting on the ch-oh group of donors with nad+ or nadp+ as acceptor isopropanol dehydrogenase (nadp+)	0.000267577	28	0.000122893	17	9.81359e-05	13	0.000126712	20	0.000173242	16	0.000148888	16	0.000207423	28	4.73429e-05	7	0.00011845	10	0.000552474	35	5.8085e-05	15	0.000152847	17	0.000137785	31	0.000144688	16	0.000171794	27	8.81322e-05	18	0.000150135	19	6.32792e-05	14	6.03609e-05	18	0.000121396	27	0.000124693	29	6.68445e-05	15	0.000113091	20	6.15725e-05
enzyme_ec	1.1.1.81	oxidoreductases acting on the ch-oh group of donors with nad+ or nadp+ as acceptor hydroxypyruvate reductase			1.5052e-06	2	4.9025e-05	6	1.38229e-05	6	3.04639e-06	3			2.30633e-06	4	0.000105713	11	3.13414e-06	3	2.42038e-06	2	4.61441e-06	1			0.000150478	15			0.000191433	12	1.04195e-05	4	1.38375e-06	2	4.98638e-05	11	2.45159e-06	3	1.687e-06	2	1.85952e-06	3	6.21954e-06	4			5.31653e-05
enzyme_ec	1.1.1.83	oxidoreductases acting on the ch-oh group of donors with nad+ or nadp+ as acceptor d-malate dehydrogenase (decarboxylating)			9.92466e-07	1	1.7326e-05	9	8.19003e-06	2	1.97785e-05	6	2.22192e-05	7	3.24359e-05	8	0.000122319	15	2.94087e-05	4	4.96985e-05	15	1.07154e-05	5			0.000126218	21	1.29983e-05	5	1.21311e-06	1	1.8543e-05	4	1.74811e-05	5	2.31179e-05	9	1.35799e-05	4	1.09962e-05	5	6.60991e-06	4	1.80253e-05	5			0.000120251
enzyme_ec	1.1.1.85	oxidoreductases acting on the ch-oh group of donors with nad+ or nadp+ as acceptor 3-isopropylmalate dehydrogenase	0.000541066	99	0.0006095	143	0.000524294	101	0.000179512	39	0.000522081	106	0.000509106	109	0.000678496	142	0.000407891	87	0.000508208	93	0.000169981	57	0.000408246	114	0.000365434	85	0.000556883	145	0.000703112	123	0.000343006	49	0.000553047	128	0.000682231	181	0.000530391	128	0.000462078	104	0.000558213	118	0.000398766	101	0.000509046	93	0.00039543	110	0.000450004
enzyme_ec	1.1.1.86	oxidoreductases acting on the ch-oh group of donors with nad+ or nadp+ as acceptor ketol-acid reductoisomerase (nadp+)	0.00549964	312	0.00571148	402	0.0054726	407	0.00557144	308	0.0062721	318	0.00594107	398	0.006367	383	0.00713446	321	0.00691428	294	0.00857476	350	0.00627739	412	0.00602253	346	0.00728956	479	0.00633453	369	0.00495879	217	0.00610428	413	0.00728806	452	0.00626325	465	0.00664415	362	0.00687316	377	0.00518098	392	0.00645526	350	0.00488744	389	0.00494011
enzyme_ec	1.1.1.93	oxidoreductases acting on the ch-oh group of donors with nad+ or nadp+ as acceptor tartrate dehydrogenase			9.92466e-07	1	1.7326e-05	9	8.19003e-06	2	1.97785e-05	6	2.22192e-05	7	3.24359e-05	8	0.000122319	15	2.94087e-05	4	4.96985e-05	15	1.07154e-05	5			0.000126218	21	1.29983e-05	5	1.21311e-06	1	1.8543e-05	4	1.74811e-05	5	2.31179e-05	9	1.35799e-05	4	1.09962e-05	5	6.60991e-06	4	1.80253e-05	5			0.000120251
enzyme_ec	1.1.1.94	oxidoreductases acting on the ch-oh group of donors with nad+ or nadp+ as acceptor glycerol-3-phosphate dehydrogenase [nad(p)+]	9.92383e-05	51	0.000102016	59	5.68403e-05	27	1.98576e-05	11	0.00018765	68	0.000121058	52	0.000154907	64	0.00020509	50	9.99479e-05	35	1.46788e-05	10	9.5148e-05	39	0.000108397	36	0.000108988	46	0.000133349	54	7.8575e-05	21	0.000152041	62	9.75646e-05	62	9.26342e-05	40	0.000102066	38	0.000110042	45	8.98241e-05	46	0.000116819	41	9.53892e-05	57	0.000171695
enzyme_ec	1.1.1.95	oxidoreductases acting on the ch-oh group of donors with nad+ or nadp+ as acceptor phosphoglycerate dehydrogenase	0.00157204	250	0.00143135	330	0.000967478	234	0.00195922	208	0.00140681	221	0.0014092	280	0.00163369	292	0.00140833	255	0.00107404	191	0.00137954	230	0.00139921	266	0.000899951	190	0.00137871	354	0.00141338	223	0.0016555	181	0.00180618	333	0.00144556	334	0.00130077	257	0.0014752	289	0.00192561	325	0.00156703	327	0.00139767	245	0.00138919	307	0.0011072
enzyme_ec	1.1.3.15	oxidoreductases acting on the ch-oh group of donors with oxygen as acceptor (s)-2-hydroxy-acid oxidase	0.00066676	47	0.000580798	49	0.000794956	46	0.00021198	32	0.000540015	46	0.00102212	60	0.000357701	28	0.000477023	27	0.000573371	26	0.000979197	54	0.000557076	43	0.000948291	46	0.000379106	30	0.000705202	47	0.0009122	45	0.000959956	49	0.000796031	53	0.000701279	61	0.000311229	34	0.000845185	59	0.000832054	58	0.000415388	36	0.000329692	38	0.000943943
enzyme_ec	1.1.3.21	oxidoreductases acting on the ch-oh group of donors with oxygen as acceptor glycerol-3-phosphate oxidase
enzyme_ec	1.1.5.3	oxidoreductases acting on the ch-oh group of donors with a quinone or similar compound as acceptor glycerol-3-phosphate dehydrogenase	0.000313325	44	0.000245117	45	0.000240484	45	5.21278e-05	14	0.000259194	32	0.000472694	63	0.00018679	40	0.000131513	29	0.000307994	33	0.000445265	42	0.000208058	35	0.000350674	52	0.000322291	54	0.000437948	54	0.000455695	63	0.000605704	45	0.000478427	61	0.000217467	42	0.00042508	81	0.000434692	57	0.000129094	26	0.000100963	26	0.000246254	56	0.000118135
enzyme_ec	1.1.98.6	oxidoreductases acting on the ch-oh group of donors with other, known, physiological acceptors ribonucleoside-triphosphate reductase (formate)	0.00017822	67	0.000152132	82	0.000291701	60	0.000174172	40	0.000178816	70	0.000146555	68	0.000329446	82	0.000181191	52	0.000149844	59	0.000123663	51	0.000224792	78	8.76342e-05	36	0.000199172	108	0.000186791	49	0.00042015	80	0.000175091	88	0.000208261	96	0.000311112	104	0.000154447	59	0.000180705	76	0.000165685	72	0.000363908	70	0.000109863	59	0.000280948
enzyme_ec	1.1.99.14	oxidoreductases acting on the ch-oh group of donors with unknown physiological acceptors glycolate dehydrogenase	0.00066676	47	0.000849114	97	0.000900145	64	0.000670072	76	0.000874513	79	0.0012588	90	0.000736999	68	0.000695843	52	0.000678573	45	0.00202115	108	0.000780441	75	0.000965194	56	0.000533972	74	0.000823612	70	0.000958051	52	0.000968359	53	0.000877286	81	0.000861426	88	0.000837907	80	0.000845185	59	0.000930971	74	0.000718976	72	0.00046156	67	0.00123104
enzyme_ec	1.1.99.28	oxidoreductases acting on the ch-oh group of donors with unknown physiological acceptors glucose-fructose oxidoreductase	0.000575124	86	0.000469486	54	5.15395e-05	17	0.000362807	59	0.000389221	70	0.00072623	68	0.00047824	71	0.000135762	28	0.000262596	43	0.000801072	139	0.00025612	55	0.000291687	51	0.00012911	33	7.34166e-05	29	0.00024286	46	0.000108734	39	0.000574332	70	0.000172256	36	0.000716355	95	0.000276569	60	0.00035516	69	0.000498074	66	0.000414548	77	5.71699e-05
enzyme_ec	1.10.2.2	Transferred to 7.1.1.8					1.43297e-05	4					3.48437e-06	1	4.39291e-06	2	2.13683e-06	1			1.68577e-06	1	1.73533e-06	2									6.47254e-06	4	8.34995e-07	1			8.97608e-06	4	2.23606e-06	1	2.96835e-06	2	9.19802e-06	4	2.14041e-06	1	1.13843e-06
enzyme_ec	1.11.1.-		1.53241e-05	6	6.05977e-06	5					1.59542e-06	2	3.14992e-06	2					2.98697e-06	1	1.02789e-05	6			9.39542e-06	3	4.54214e-07	1			1.25866e-06	1	2.23784e-06	1	3.08244e-06	3							3.58814e-05	11
enzyme_ec	1.11.1.1	oxidoreductases acting on a peroxide as acceptor peroxidases nadh peroxidase															2.82792e-06	1											2.66602e-06	2																	5.49286e-06	3	0
enzyme_ec	1.11.1.10	oxidoreductases acting on a peroxide as acceptor peroxidases chloride peroxidase			5.6182e-06	4					1.17602e-06	2			9.97367e-07	1	2.04074e-06	2													4.27981e-07	1			1.67763e-06	2			1.31874e-05	5	2.21853e-06	2	8.81102e-07	1			4.28414e-07	1	2.67899e-05
enzyme_ec	1.11.1.15	Transferred to 1.11.1.24 and 1.11.1.25 and 1.11.1.26 and 1.11.1.27 and 1.11.1.28 and 1.11.1.29	0.000219157	39	0.000782288	62	0.000151298	33	9.10554e-05	23	0.000620606	60	0.000207545	43	0.000510321	67	0.000289202	59	0.000449036	40	0.00027655	50	0.000141636	27	0.00139009	68	0.000166133	33	0.00037093	58	0.000227483	39	0.000399701	74	0.000405159	52	0.000141373	30	0.000213614	52	7.35541e-05	32	0.000134601	30	0.000367145	65	0.000551784	68	7.53027e-05
enzyme_ec	1.11.1.21	oxidoreductases acting on a peroxide as acceptor peroxidases catalase-peroxidase	3.66148e-06	4											1.32198e-06	1	6.62847e-07	1															9.37654e-07	1			2.01692e-05	9	4.1824e-06	3			1.08851e-06	1
enzyme_ec	1.11.1.24	oxidoreductases acting on a peroxide as acceptor peroxidases thioredoxin-dependent peroxiredoxin	0.000538976	66	0.000304833	77	0.0002103	46	0.000178204	35	0.000447938	66	0.000511788	86	0.000496592	88	0.000302749	62	0.000625478	71	0.000560604	89	0.000387084	72	0.000513104	69	0.000498484	76	0.000544523	75	0.000295302	43	0.000425604	88	0.000513374	85	0.000199874	60	0.000597855	89	0.000273648	73	0.000316648	76	0.000415124	75	0.000449845	102	0.000118792
enzyme_ec	1.11.1.25	oxidoreductases acting on a peroxide as acceptor peroxidases glutaredoxin-dependent peroxiredoxin	6.08554e-06	5	6.1541e-05	7	1.17716e-05	4	3.47654e-06	2	2.78723e-06	4	1.84402e-06	2	3.90137e-06	3	4.05303e-06	1			1.74535e-05	4	3.54743e-06	2	0.000111984	11			4.07031e-06	3	4.26282e-06	2	6.4825e-06	3	1.22126e-05	8	2.59202e-06	3	4.25316e-06	2	1.55758e-06	2	1.1279e-06	1	2.49488e-05	5	7.17537e-06	5	1.14227e-05
enzyme_ec	1.11.1.26	oxidoreductases acting on a peroxide as acceptor peroxidases nadh-dependent peroxiredoxin	0.000293887	46	0.000482443	56	0.00017123	23	0.000129668	26	0.000849647	53	0.000667072	59	0.00108149	68	0.000441498	43	0.000548653	46	0.000266221	34	0.000198682	32	0.000686234	55	0.000203667	30	0.00112624	73	0.000157012	30	0.000841284	75	0.00057371	49	0.000546416	61	0.000660323	76	0.000118269	36	0.000238065	41	0.000377472	53	0.00044575	50	0.000321497
enzyme_ec	1.11.1.28	oxidoreductases acting on a peroxide as acceptor peroxidases lipoyl-dependent peroxiredoxin									7.95398e-06	2			4.46155e-06	1																																	2.1246e-06
enzyme_ec	1.11.1.5	oxidoreductases acting on a peroxide as acceptor peroxidases cytochrome-c peroxidase	4.55794e-06	3	2.62237e-06	2					1.00925e-06	1	8.23576e-07	2	1.48381e-06	1			1.37656e-05	4	3.25022e-06	3					7.93334e-07	1	5.86786e-06	1	4.0057e-06	2	2.7348e-06	2					1.57942e-06	1	4.76534e-06	3
enzyme_ec	1.11.1.6	oxidoreductases acting on a peroxide as acceptor peroxidases catalase	0.000304553	48	3.14321e-05	21	0.000143032	15	3.29393e-06	3	6.96607e-05	21	5.11818e-05	21	9.56702e-06	9	4.53117e-05	14	0.000121914	35	9.98982e-05	39	6.78145e-05	16	0.000493724	44	1.00542e-05	9	6.89621e-05	21	1.21443e-05	5	4.00768e-05	24	4.71546e-05	25			8.24407e-05	25	3.11145e-05	13	6.34089e-06	6	5.36985e-05	5	0.00011238	40	6.03285e-07
enzyme_ec	1.11.1.7	oxidoreductases acting on a peroxide as acceptor peroxidases peroxidase	6.13619e-05	12	0.000595523	36	2.0544e-05	8	0.000387246	20	2.931e-05	8	0.000551498	28	0.000125986	14	0.000176476	28	2.2178e-05	5	0.000167357	24	4.55259e-05	11	0.00104931	42	0.00014445	25	5.19181e-05	9	0.000601204	31	8.56222e-05	16	5.6306e-05	17	7.31623e-05	13	0.000634575	29	0.000299969	25	0.000588443	25	3.45451e-05	9	0.000420716	35	0.000155551
enzyme_ec	1.11.1.9	oxidoreductases acting on a peroxide as acceptor peroxidases glutathione peroxidase	5.64466e-07	1	4.53826e-05	10	4.34191e-05	10	1.3033e-05	8	2.15035e-06	2			3.06829e-06	2	8.35199e-06	5	1.05486e-05	2	2.87139e-05	11			0.000137512	11	4.80891e-06	3	4.40515e-05	7	1.28114e-05	4	9.94875e-06	6	1.17274e-06	2	1.82886e-06	1	5.52963e-06	4	9.64937e-06	8			5.86552e-05	18	3.16532e-05	7	9.13112e-05
enzyme_ec	1.11.2.2	oxidoreductases acting on a peroxide as acceptor peroxygenases myeloperoxidase	5.64707e-05	12	6.38085e-05	17	3.9e-05	12	0.0003285	23	1.38344e-05	7	8.14637e-05	17	1.81844e-05	5	1.26936e-05	6	2.26837e-05	9	8.22533e-05	17	6.89678e-05	15	0.000129203	19	5.13693e-05	13	5.36569e-05	12	0.00014656	15	0.000197147	21	0.000196224	28	0.000209496	25	6.1891e-05	12	7.07587e-05	17	0.00030644	28	2.4836e-05	8	0.000148273	22	5.51466e-05
enzyme_ec	1.12.-.-				1.18156e-06	3			4.81356e-06	3	1.54793e-06	1	9.43943e-07	1			4.19654e-06	2	3.28212e-05	8	1.45225e-06	3	1.80094e-06	2			7.1131e-07	1	1.54951e-06	2			6.36588e-06	6	4.71188e-06	4	5.48693e-07	1	6.22047e-07	1	4.42763e-06	5					5.51591e-07	2
enzyme_ec	1.12.1.3	oxidoreductases acting on hydrogen as donor with nad+ or nadp+ as acceptor hydrogen dehydrogenase (nadp+)	0.00162811	283	0.001231	301	0.00095603	200	0.000527858	142	0.00134605	250	0.000827906	196	0.0011559	251	0.00107421	180	0.00154791	254	0.000977693	267	0.00157505	313	0.000958709	208	0.00171919	399	0.000979116	194	0.00125466	219	0.00153524	345	0.00145947	356	0.00107938	245	0.00113289	267	0.00184135	403	0.00151093	334	0.00144206	230	0.00130041	286	0.000931639
enzyme_ec	1.12.98.1	oxidoreductases acting on hydrogen as donor with other, known, physiological acceptors coenzyme f420 hydrogenase			4.44757e-06	5	6.27885e-05	21	1.0132e-06	1			5.05519e-06	4	1.64032e-05	12	8.14085e-06	6	9.56823e-06	2	0.00101894	45	7.12846e-05	20	0	0	8.98909e-05	23	7.12067e-06	5	0.000369629	37	4.46153e-06	5			1.25805e-06	2	3.83197e-06	5	0.000128219	35	7.86206e-05	18	1.70194e-06	2	7.89997e-06	6	2.72077e-06
enzyme_ec	1.12.98.2	oxidoreductases acting on hydrogen as donor with other, known, physiological acceptors 5,10-methenyltetrahydromethanopterin hydrogenase					0.000131646	10					9.37934e-06	4							0.00100231	16	0.000135619	11			0.00014005	13			0.000141397	10									0.000134479	15	0.000148551	15					3.41131e-05
enzyme_ec	1.12.99.-		9.8176e-05	10	0.000114501	18	0.000197394	34	3.30893e-05	6	0.000123326	13	7.05016e-05	12	6.48472e-05	12	5.17493e-05	10	0.00015628	14	0.00340409	95	0.000416118	46	6.3173e-05	11	0.000602584	88	4.83895e-05	8	0.000968997	56	6.66648e-05	14	0.000111651	17	7.73875e-05	16	0.000159106	36	0.000306376	46	0.000365595	47	6.06943e-05	19	0.000119744	19	9.84272e-05
enzyme_ec	1.12.99.6	oxidoreductases acting on hydrogen as donor with unknown physiological acceptors hydrogenase (acceptor)	4.59903e-05	16	5.23776e-05	20	9.47198e-06	5	2.35334e-05	9	3.02467e-05	13	1.94946e-05	7	3.60129e-05	16	4.38215e-06	5	1.8355e-05	8	7.23613e-05	25	2.17133e-05	14	4.00806e-05	11	3.38096e-06	3	4.51759e-06	4	4.52673e-05	18	3.54848e-05	20	1.79148e-05	14	9.81963e-06	8	5.02468e-05	18	2.39998e-05	11	3.59974e-05	14	1.36186e-05	10	1.15518e-05	8	0.00022428
enzyme_ec	1.13.11.18	oxidoreductases acting on single donors with incorporation of molecular oxygen (oxygenases) with incorporation of two atoms of oxygen persulfide dioxygenase					1.63786e-05	5			1.20327e-06	1	3.24703e-06	2	9.92677e-07	1	8.62272e-06	2			7.87115e-06	2	9.91828e-06	3			8.3596e-07	1			7.7073e-06	2	2.13701e-05	7					8.02628e-06	4					2.69889e-05	6	5.70633e-06	3	5.67949e-06
enzyme_ec	1.13.11.24	oxidoreductases acting on single donors with incorporation of molecular oxygen (oxygenases) with incorporation of two atoms of oxygen quercetin 2,3-dioxygenase	2.70223e-05	5	4.6691e-06	4			3.08701e-05	5	1.13648e-05	7	1.19828e-05	5	1.59455e-05	6	9.76212e-07	1	3.5352e-05	5	1.28697e-05	5	1.65481e-06	1	1.03705e-05	6	1.55785e-05	7	7.28761e-06	3	9.13301e-07	1	4.4737e-06	4	1.63109e-05	5	6.18062e-06	3	1.11358e-05	2	1.18124e-05	6	4.44071e-06	2	1.87697e-06	2	1.18531e-05	4
enzyme_ec	1.13.12.16	oxidoreductases acting on single donors with incorporation of molecular oxygen (oxygenases) with incorporation of one atom of oxygen (internal monooxygenases or internal mixed-function oxidases) nitronate monooxygenase			2.36221e-06	3	1.58396e-06	2	3.19598e-06	3			1.05468e-06	1	9.59476e-06	6			9.16936e-06	3					9.8138e-07	1	2.29217e-06	2	1.14533e-06	1			6.81009e-06	3	2.14439e-06	3									5.15225e-07	1			2.44201e-05
enzyme_ec	1.14.11.54	oxidoreductases acting on paired donors, with incorporation or reduction of molecular oxygen with 2-oxoglutarate as one donor, and incorporation of one atom of oxygen into each donor mrna n1-methyladenine demethylase
enzyme_ec	1.14.11.68	oxidoreductases acting on paired donors, with incorporation or reduction of molecular oxygen with 2-oxoglutarate as one donor, and incorporation of one atom of oxygen into each donor [histone h3]-trimethyl-l-lysine27 demethylase	0	0	0	0					0	0	0	0							0	0	0	0			0	0			0	0	0	0					0	0							0	0	0
enzyme_ec	1.14.11.7	oxidoreductases acting on paired donors, with incorporation or reduction of molecular oxygen with 2-oxoglutarate as one donor, and incorporation of one atom of oxygen into each donor procollagen-proline 3-dioxygenase
enzyme_ec	1.14.13.39	oxidoreductases acting on paired donors, with incorporation or reduction of molecular oxygen with nadh or nadph as one donor, and incorporation of one atom of oxygen into the other donor nitric-oxide synthase (nadph)																															1.50871e-05	7											6.64961e-06	5	3.02358e-06	1
enzyme_ec	1.14.14.18	oxidoreductases acting on paired donors, with incorporation or reduction of molecular oxygen with reduced flavin or flavoprotein as one donor, and incorporation of one atom of oxygen into the other donor heme oxygenase (biliverdin-producing)													1.44305e-06	1																			2.00107e-06	1											1.12146e-06	1
enzyme_ec	1.14.99.1	oxidoreductases acting on paired donors, with incorporation or reduction of molecular oxygen miscellaneous prostaglandin-endoperoxide synthase			3.90111e-05	1					3.68483e-05	1	3.70912e-05	1			7.40234e-05	1					2.2156e-05	1			5.56982e-05	1	0	0			6.34593e-05	1							5.64787e-05	1			4.43697e-05	1	4.11298e-05	1	4.32278e-05
enzyme_ec	1.15.1.1	oxidoreductases acting on superoxide as acceptor acting on superoxide as acceptor (only sub-subclass identified to date) superoxide dismutase	0.000246525	34	0.000137975	29	0.000328475	32	0.000299459	31	0.000292592	30	0.000174855	36	0.000209643	44	0.000150623	37	0.000121607	26	0.000414073	58	0.000171077	34	0.000477315	35	0.000266828	47	0.000525724	50	0.000157593	25	0.000175858	43	0.000235041	48	0.00011343	29	0.000242602	47	0.000105184	27	0.000119819	27	9.4655e-05	21	0.000229942	45	5.84051e-05
enzyme_ec	1.15.1.2	oxidoreductases acting on superoxide as acceptor acting on superoxide as acceptor (only sub-subclass identified to date) superoxide reductase	0.000331838	46	0.000500801	47	0.000538758	42	0.000961494	34	0.000162168	30	0.000245335	29	0.000207821	36	0.000234076	30	0.00026667	29	0.000762691	71	0.000254153	37	0.00028039	24	0.000186701	42	0.000290089	34	0.000437545	43	0.000454551	43	0.000280122	42	0.000367172	41	0.000517627	53	0.000611916	70	0.000205252	32	0.000468625	36	0.000199654	37	0.000577204
enzyme_ec	1.16.1.10	oxidoreductases oxidizing metal ions with nad+ or nadp+ as acceptor ferric-chelate reductase [nad(p)h]	0.000274513	48	0.000189222	58	8.17343e-05	31	0.000120779	30	0.000238483	49	0.000260923	62	0.000112508	42	0.000153918	45	0.000269445	49	0.000383532	70	0.000154267	44	0.000193709	49	0.000223838	69	0.000117614	29	0.000199027	40	0.000335059	73	0.000558067	78	0.000236282	47	0.000145489	47	0.000201254	55	0.000350487	79	8.4389e-05	32	0.000282864	57	0.000150433
enzyme_ec	1.16.3.1	oxidoreductases oxidizing metal ions with oxygen as acceptor ferroxidase	0.000190786	21	0.000162233	36	3.58896e-05	14	0.000130214	17	8.30199e-05	18	0.000128799	22	0.000295774	35	4.6882e-05	9	3.42678e-05	12	0.000394296	36	3.46518e-05	14	0.000109873	16	2.24306e-05	9	0.000104608	28	2.30564e-05	5	9.81524e-05	27	0.000109224	29	0.00033363	25	0.000290149	24	9.56694e-05	17	6.0736e-05	11	0.000175603	23	0.000202711	30	0.000182145
enzyme_ec	1.16.3.2	oxidoreductases oxidizing metal ions with oxygen as acceptor bacterial non-heme ferritin	0.00113996	91	0.000984166	94	0.000112762	38	0.00112218	84	0.000507474	61	0.000991783	103	0.00115601	106	0.000489393	64	0.000663116	76	0.00211225	153	0.000767598	85	0.000933244	87	0.000523618	87	0.000514505	64	0.000186513	30	0.00089841	111	0.00094344	104	0.00066164	83	0.00115451	113	0.00168778	119	0.000821512	99	0.000611	72	0.000896301	106	0.000605158
enzyme_ec	1.16.3.3	oxidoreductases oxidizing metal ions with oxygen as acceptor manganese oxidase									6.49097e-06	4
enzyme_ec	1.17.1.1	oxidoreductases acting on ch or ch2 groups with nad+ or nadp+ as acceptor cdp-4-dehydro-6-deoxyglucose reductase	0.000149816	28	0.0001106	31	7.75027e-06	5	2.05328e-05	5	5.63045e-05	19	2.79024e-05	12	4.06203e-05	21	1.87566e-05	8	6.10936e-05	15	3.50059e-05	8	0.000148817	41	2.93629e-05	12	0.000110401	33	3.12633e-05	13	5.27829e-06	2	5.6848e-05	20	0.000107464	39	3.01393e-05	14	3.18024e-05	17	6.27248e-05	23	0.000120381	23	2.10838e-05	10	7.59378e-05	26	4.7583e-06
enzyme_ec	1.17.1.10	oxidoreductases acting on ch or ch2 groups with nad+ or nadp+ as acceptor formate dehydrogenase (nadp+)	6.60002e-06	4	7.28272e-06	5	5.64637e-05	13	2.02837e-05	6	4.81682e-06	6			6.95991e-06	7	1.66814e-05	6	1.13577e-06	2	3.64906e-06	4	8.0269e-06	4			5.99141e-06	6	2.75697e-06	2	1.5414e-05	5	4.1925e-06	3	3.70787e-06	4	1.12742e-06	2	2.55025e-05	12	2.1684e-06	2	5.01771e-06	3	0.000122977	30	5.59611e-06	5	1.13464e-06
enzyme_ec	1.17.1.11	oxidoreductases acting on ch or ch2 groups with nad+ or nadp+ as acceptor formate dehydrogenase (nad+, ferredoxin)	0.00104252	157	0.00141108	222	0.000830875	151	0.000488105	87	0.000642969	94	0.000570509	120	0.000468071	107	0.000734617	113	0.000902469	113	0.000666326	163	0.00106086	192	0.000561751	112	0.00113154	212	0.000544145	101	0.00060204	107	0.001159	220	0.00123806	239	0.000329834	96	0.00100577	182	0.00123751	257	0.00116702	211	0.00176931	200	0.00111318	188	0.000678396
enzyme_ec	1.17.1.4	oxidoreductases acting on ch or ch2 groups with nad+ or nadp+ as acceptor xanthine dehydrogenase	0.00065541	118	0.000645624	180	0.000268833	63	0.00148429	206	0.000556926	80	0.000534832	128	0.000437841	89	0.000397483	76	0.000292777	61	0.00128896	162	0.000330481	60	7.52888e-05	39	0.000287024	91	0.000293675	58	0.000484011	90	0.000300563	110	0.000328003	130	0.000220078	67	0.000875223	140	0.000463342	126	0.000356107	89	0.00024598	65	0.000397409	117	0.000630949
enzyme_ec	1.17.1.8	oxidoreductases acting on ch or ch2 groups with nad+ or nadp+ as acceptor 4-hydroxy-tetrahydrodipicolinate reductase	0.00018228	53	0.000212169	58	0.000154438	33	9.76302e-05	29	0.000152797	49	0.000142042	42	0.000188618	54	0.00012817	48	0.000129288	44	0.000145199	33	0.000145482	61	8.47299e-05	34	0.000219193	71	0.000215054	61	9.75599e-05	21	0.000133661	53	0.000214438	88	0.000134233	57	0.000182756	63	0.00022009	75	9.01703e-05	39	0.000217392	53	0.00011814	40	0.000216385
enzyme_ec	1.17.1.9	oxidoreductases acting on ch or ch2 groups with nad+ or nadp+ as acceptor formate dehydrogenase	0	0			6.98693e-05	15	1.44699e-06	1	1.6189e-06	3	1.23417e-06	1	8.11607e-07	2					0.00382415	79	0.00012103	18			0.000393332	49			0.000652775	45			1.40225e-06	2			8.41211e-07	1	0.000251543	41	0.000377273	50					3.85152e-05
enzyme_ec	1.17.4.1	oxidoreductases acting on ch or ch2 groups with a disulfide as acceptor ribonucleoside-diphosphate reductase	0.000264855	60	8.9702e-05	43	5.93549e-06	4	5.31466e-05	16	0.000136424	40	0.000309931	56	0.00033093	65	6.43241e-05	22	0.000191047	39	4.33579e-05	18	0.000115002	34	3.79606e-05	10	0.000633616	67	0.000143238	39	4.6005e-05	17	0.000143761	49	0.000296429	69	4.81221e-05	22	0.000151553	35	6.23389e-05	29	0.000133364	57	6.60141e-05	28	0.000150084	47	2.07427e-05
enzyme_ec	1.17.4.2	oxidoreductases acting on ch or ch2 groups with a disulfide as acceptor ribonucleoside-triphosphate reductase (thioredoxin)	7.71315e-06	3	4.13599e-06	3	6.83493e-05	29	4.09007e-06	2	8.59598e-06	8	8.12612e-06	5	6.35742e-05	25	6.33328e-05	21	2.87849e-05	16	3.63283e-06	3	7.73107e-05	29	4.00325e-06	3	3.45448e-05	19	6.19235e-05	18	0.000191325	28	4.61015e-05	24	1.06714e-05	9	0.000112484	29	4.78103e-05	15	1.57323e-05	11	2.06053e-05	12	1.34195e-05	8	2.86325e-06	4	3.00498e-05
enzyme_ec	1.17.5.3	oxidoreductases acting on ch or ch2 groups with a quinone or similar compound as acceptor formate dehydrogenase-n							1.44699e-06	1					1.83878e-05	9	3.7853e-06	2			2.62375e-06	2			1.25462e-06	1	1.73704e-06	2			7.58018e-06	3							1.98389e-06	2			1.14762e-05	7			9.7264e-06	8	3.47256e-06
enzyme_ec	1.17.7.1	oxidoreductases acting on ch or ch2 groups with an iron-sulfur protein as acceptor (e)-4-hydroxy-3-methylbut-2-enyl-diphosphate synthase (ferredoxin)	0.000185788	55	0.000249389	98	0.00019043	56	5.70952e-05	22	0.000228012	78	0.000180287	67	0.000220663	79	0.000251706	60	0.000166773	65	6.58153e-05	27	0.000302671	67	0.00013441	50	0.000213166	79	0.000171989	66	0.000158085	41	0.00017306	77	0.000168517	86	0.000235327	78	0.000185615	64	0.000224628	83	0.000168981	68	0.000158334	60	0.000195028	77	0.000287646
enzyme_ec	1.17.7.3	oxidoreductases acting on ch or ch2 groups with an iron-sulfur protein as acceptor (e)-4-hydroxy-3-methylbut-2-enyl-diphosphate synthase (flavodoxin)	0.000185788	55	0.000249389	98	0.00019043	56	5.70952e-05	22	0.000228012	78	0.000180287	67	0.000220663	79	0.000251706	60	0.000166773	65	6.58153e-05	27	0.000302671	67	0.00013441	50	0.000213166	79	0.000171989	66	0.000158085	41	0.00017306	77	0.000168517	86	0.000235327	78	0.000185615	64	0.000224628	83	0.000168981	68	0.000158334	60	0.000195028	77	0.000287646
enzyme_ec	1.17.7.4	oxidoreductases acting on ch or ch2 groups with an iron-sulfur protein as acceptor 4-hydroxy-3-methylbut-2-en-1-yl diphosphate reductase	0.000729861	54	0.000922549	92	0.000499996	67	0.000603379	78	0.00143794	79	0.00136898	106	0.00187285	85	0.00123367	101	0.00123773	75	0.000570112	98	0.0010045	85	0.00132651	70	0.000862377	104	0.00141143	83	0.00164209	116	0.00120168	129	0.000751673	90	0.00118304	85	0.00176626	107	0.00129841	102	0.00146247	160	0.001324	83	0.0011782	118	0.00101326
enzyme_ec	1.17.98.3	oxidoreductases acting on ch or ch2 groups with other, known, physiological acceptors formate dehydrogenase (coenzyme f420)	0.000184237	16	5.32523e-05	19	9.73945e-05	27	1.64935e-05	4	4.05547e-05	8	0.000121185	20	1.73148e-05	6	2.74536e-05	7	0.000131127	17	0.00403437	117	0.000214918	50	8.65299e-05	16	0.000512339	72	2.86349e-05	8	0.000732048	61	4.8036e-05	21	9.38753e-05	23	0.000103334	23	8.14459e-06	3	0.000273596	54	0.000426953	63	1.58251e-05	5	8.94459e-05	21	6.75503e-05
enzyme_ec	1.17.99.6	oxidoreductases acting on ch or ch2 groups with unknown physiological acceptors epoxyqueuosine reductase	3.84694e-06	1	4.51652e-06	1			6.60551e-06	1	1.6493e-05	3			8.81426e-06	2	2.14564e-05	3	3.49763e-05	2	4.7188e-06	1	7.13486e-07	1			1.79239e-06	2	2.27136e-06	1	3.9669e-06	1	6.38956e-07	1	4.82459e-06	4	6.7928e-07	1	1.19854e-05	1	5.89663e-06	3	3.79655e-06	1	1.14266e-05	2	7.56475e-06	3	4.89855e-06
enzyme_ec	1.18.1.2	oxidoreductases acting on iron-sulfur proteins as donors with nad+ or nadp+ as acceptor ferredoxinâ€”nadp+ reductase	0.000114558	27	6.52264e-05	24	1.05755e-05	4	7.56267e-05	17	9.08642e-05	24	7.02296e-05	23	0.000159435	24	8.0637e-05	19	0.000165056	28	4.66426e-05	9	7.98977e-05	29	3.33142e-05	13	0.000116061	37	0.00011145	32	6.5154e-05	10	0.000218662	48	7.9998e-05	37	5.00731e-05	19	7.57883e-05	17	8.21768e-05	33	6.82517e-05	26	0.000128676	24	5.74283e-05	20	0.000162964
enzyme_ec	1.18.1.3	oxidoreductases acting on iron-sulfur proteins as donors with nad+ or nadp+ as acceptor ferredoxinâ€”nad+ reductase					1.8389e-05	7			8.48621e-05	20	1.72694e-05	9	0.000192157	26	4.70886e-05	11	3.93957e-05	13	3.91238e-05	11	7.99482e-05	18			1.25206e-05	5	2.41612e-05	8			4.08452e-05	15					0.000113311	21	4.301e-05	14	6.8788e-06	3					5.18488e-05
enzyme_ec	1.18.1.6	oxidoreductases acting on iron-sulfur proteins as donors with nad+ or nadp+ as acceptor adrenodoxin-nadp+ reductase			4.3807e-07	1	1.61794e-06	2	1.0991e-05	6	8.35862e-06	5	2.18613e-05	7	2.5531e-06	3	8.8017e-05	14	7.11195e-05	14	2.51985e-06	2	3.54418e-05	13	2.21035e-06	2	6.92614e-05	21	7.20291e-05	18			2.8945e-05	13	1.44827e-05	11	3.47303e-06	3	2.3256e-06	2	1.27123e-05	7	2.45164e-05	9	5.57796e-06	2			0.000155333
enzyme_ec	1.18.6.1	oxidoreductases acting on iron-sulfur proteins as donors with dinitrogen as acceptor nitrogenase	3.53178e-07	1									4.19677e-07	1	5.24786e-07	1											2.52137e-06	1					6.55758e-07	1
enzyme_ec	1.19.1.1	oxidoreductases acting on reduced flavodoxin as donor with nad+ or nadp+ as acceptor flavodoxinâ€”nadp+ reductase	0.000114558	27	6.52264e-05	24	1.05755e-05	4	7.56267e-05	17	9.08642e-05	24	7.02296e-05	23	0.000159435	24	8.0637e-05	19	0.000165056	28	4.66426e-05	9	7.98977e-05	29	3.33142e-05	13	0.000116061	37	0.00011145	32	6.5154e-05	10	0.000218662	48	7.9998e-05	37	5.00731e-05	19	7.57883e-05	17	8.21768e-05	33	6.82517e-05	26	0.000128676	24	5.74283e-05	20	0.000162964
enzyme_ec	1.2.1.-		0.000144042	37	0.000107625	31	8.06636e-05	21	2.35551e-05	7	4.89783e-05	18	0.000141186	36	9.70112e-05	33	7.13028e-05	22	1.9634e-05	9	0.000703506	61	0.000149841	34	6.267e-05	19	0.000261014	53	7.28497e-05	23	0.000382926	45	0.00015454	39	7.79636e-05	31	5.02035e-05	24	0.000154407	38	8.789e-05	26	0.000134186	33	6.40016e-05	25	8.53136e-05	33	0.000176022
enzyme_ec	1.2.1.10	oxidoreductases acting on the aldehyde or oxo group of donors with nad+ or nadp+ as acceptor acetaldehyde dehydrogenase (acetylating)	0.00339796	331	0.00406924	390	0.00500158	430	0.00722081	438	0.00325387	336	0.00538771	492	0.00447483	383	0.0063249	401	0.00246959	274	0.00746388	364	0.00357982	437	0.00204654	260	0.00444328	478	0.00452152	403	0.00668416	312	0.00558044	399	0.00364257	444	0.00434872	474	0.00651784	465	0.00580077	444	0.00553663	451	0.00380959	356	0.00380722	415	0.00490652
enzyme_ec	1.2.1.11	oxidoreductases acting on the aldehyde or oxo group of donors with nad+ or nadp+ as acceptor aspartate-semialdehyde dehydrogenase	0.00134519	181	0.0016672	233	0.0012803	162	0.00145991	164	0.00116625	169	0.00144328	193	0.00160932	194	0.00155093	167	0.00161359	185	0.00304392	223	0.00150653	232	0.00142404	177	0.001756	275	0.00146946	202	0.000972375	113	0.00130968	210	0.00201197	311	0.001398	205	0.00232042	264	0.00157083	210	0.00137627	210	0.00130174	180	0.00164647	245	0.0011696
enzyme_ec	1.2.1.12	oxidoreductases acting on the aldehyde or oxo group of donors with nad+ or nadp+ as acceptor glyceraldehyde-3-phosphate dehydrogenase (phosphorylating)	0.0182942	473	0.0178969	571	0.0185596	650	0.0193835	649	0.0224112	484	0.0187681	645	0.017173	542	0.0209151	587	0.0204592	484	0.01264	570	0.0170328	581	0.0185265	459	0.0174312	677	0.0198806	544	0.0217184	605	0.017636	544	0.0142851	533	0.0186176	636	0.0183497	661	0.0172877	630	0.0154236	606	0.0200915	580	0.0185335	675	0.0182828
enzyme_ec	1.2.1.16	oxidoreductases acting on the aldehyde or oxo group of donors with nad+ or nadp+ as acceptor succinate-semialdehyde dehydrogenase [nad(p)+]	5.31841e-05	16	7.86784e-06	6	1.12448e-05	7	1.31823e-05	5	1.26169e-06	2	8.37228e-06	5			2.55619e-06	4	0	0	9.12055e-05	23	4.47117e-06	3			5.55078e-06	5	2.14814e-05	14	3.58097e-05	11	3.48475e-06	3	2.16686e-05	9	5.01125e-06	6	1.93509e-05	11	3.14957e-06	3	2.45808e-06	2	2.39845e-06	2	7.82216e-07	2	1.88051e-05
enzyme_ec	1.2.1.18	oxidoreductases acting on the aldehyde or oxo group of donors with nad+ or nadp+ as acceptor malonate-semialdehyde dehydrogenase (acetylating)	1.22083e-05	6	5.63274e-05	12	7.50553e-05	14	3.31662e-05	11	1.84855e-05	5	1.14035e-05	5	5.3263e-05	12	4.62427e-05	11	8.27213e-05	12	2.65261e-05	9	2.55348e-05	9	1.36505e-05	4	3.88057e-05	9	6.49052e-05	13	1.62621e-05	4	4.16651e-05	12	2.92219e-06	3	2.23445e-05	11	1.47414e-05	5	8.64226e-05	18	2.72199e-05	8	1.99496e-05	11	2.79037e-05	10	1.11832e-05
enzyme_ec	1.2.1.20	oxidoreductases acting on the aldehyde or oxo group of donors with nad+ or nadp+ as acceptor glutarate-semialdehyde dehydrogenase	5.31841e-05	16	7.86784e-06	6	1.12448e-05	7	1.31823e-05	5	1.26169e-06	2	8.37228e-06	5			2.55619e-06	4	0	0	9.12055e-05	23	4.47117e-06	3			5.55078e-06	5	2.14814e-05	14	3.58097e-05	11	3.48475e-06	3	2.16686e-05	9	5.01125e-06	6	1.93509e-05	11	3.14957e-06	3	2.45808e-06	2	2.39845e-06	2	7.82216e-07	2	1.88051e-05
enzyme_ec	1.2.1.21	oxidoreductases acting on the aldehyde or oxo group of donors with nad+ or nadp+ as acceptor glycolaldehyde dehydrogenase	0.00015683	17	6.0424e-05	15			1.24405e-05	4	8.24798e-06	4	0.00011167	16	0.000219137	21	1.58029e-05	2	4.30847e-05	8	0.000178163	27	1.35388e-05	4	8.96831e-06	4	4.42699e-05	10	3.21092e-05	9	8.0615e-06	4	2.42402e-05	6	5.03976e-05	13	1.42024e-06	1	4.58654e-05	11	1.26781e-05	5	4.52556e-06	1	3.92948e-05	12	6.51069e-05	13	3.16229e-06
enzyme_ec	1.2.1.22	oxidoreductases acting on the aldehyde or oxo group of donors with nad+ or nadp+ as acceptor lactaldehyde dehydrogenase	0.00015683	17	6.0424e-05	15			1.24405e-05	4	8.24798e-06	4	0.00011167	16	0.000219137	21	1.58029e-05	2	4.30847e-05	8	0.000193098	33	1.56032e-05	5	8.96831e-06	4	4.42699e-05	10	3.21092e-05	9	8.0615e-06	4	2.42402e-05	6	5.03976e-05	13	1.42024e-06	1	4.58654e-05	11	1.31197e-05	6	4.52556e-06	1	3.92948e-05	12	6.51069e-05	13	2.10582e-05
enzyme_ec	1.2.1.27	oxidoreductases acting on the aldehyde or oxo group of donors with nad+ or nadp+ as acceptor methylmalonate-semialdehyde dehydrogenase (coa-acylating)	1.22083e-05	6	5.63274e-05	12	7.50553e-05	14	3.31662e-05	11	1.84855e-05	5	1.14035e-05	5	5.3263e-05	12	4.62427e-05	11	8.27213e-05	12	2.65261e-05	9	2.55348e-05	9	1.36505e-05	4	3.88057e-05	9	6.49052e-05	13	1.62621e-05	4	4.16651e-05	12	2.92219e-06	3	2.23445e-05	11	1.47414e-05	5	8.64226e-05	18	2.72199e-05	8	1.99496e-05	11	2.79037e-05	10	1.11832e-05
enzyme_ec	1.2.1.38	oxidoreductases acting on the aldehyde or oxo group of donors with nad+ or nadp+ as acceptor n-acetyl-Î³-glutamyl-phosphate reductase	0.000419104	82	0.000434667	115	0.000339883	58	0.000933629	101	0.000400642	83	0.000338595	85	0.000444396	98	0.000189217	65	0.000254167	67	0.000674155	91	0.00029752	72	0.000310383	66	0.000334601	105	0.000453302	84	0.000279367	50	0.000395949	109	0.000376904	103	0.0003476	87	0.000428861	102	0.000506232	105	0.00031409	79	0.000246929	64	0.000408655	93	0.000465407
enzyme_ec	1.2.1.41	oxidoreductases acting on the aldehyde or oxo group of donors with nad+ or nadp+ as acceptor glutamate-5-semialdehyde dehydrogenase	0.000211327	83	0.000173058	90	7.05772e-05	32	4.75839e-05	21	0.000216242	68	0.000169263	64	0.000217156	86	0.000213374	73	0.000163251	60	3.95034e-05	21	0.000170593	73	6.93253e-05	42	0.000224662	93	0.000140192	62	0.000151838	39	0.00022598	94	0.000175865	96	0.000146987	66	0.000157211	69	0.000222808	89	8.23112e-05	49	0.000263645	67	0.000160784	80	0.000115743
enzyme_ec	1.2.1.59	oxidoreductases acting on the aldehyde or oxo group of donors with nad+ or nadp+ as acceptor glyceraldehyde-3-phosphate dehydrogenase (nad(p)+) (phosphorylating)					9.47857e-07	1					8.33853e-06	3							8.05888e-05	21	2.13405e-06	1			1.82422e-06	2			9.64719e-06	4							1.35663e-06	1	1.31429e-06	1	2.55144e-06	1					6.21337e-07
enzyme_ec	1.2.1.76	oxidoreductases acting on the aldehyde or oxo group of donors with nad+ or nadp+ as acceptor succinate-semialdehyde dehydrogenase (acylating)	3.3134e-06	2	4.15882e-06	4	2.30926e-06	1	1.92172e-05	4					0	0	1.4448e-05	3	5.47078e-06	3	5.29023e-05	8	5.14625e-06	2			0	0							2.82933e-07	1	1.51127e-05	8	7.86899e-06	4	6.41555e-06	3	4.59039e-06	1	1.36679e-06	2	4.30741e-06	2	5.60014e-06
enzyme_ec	1.2.1.79	oxidoreductases acting on the aldehyde or oxo group of donors with nad+ or nadp+ as acceptor succinate-semialdehyde dehydrogenase (nadp+)	5.31841e-05	16	7.86784e-06	6	1.12448e-05	7	1.31823e-05	5	1.26169e-06	2	8.37228e-06	5			2.55619e-06	4	0	0	9.12055e-05	23	4.47117e-06	3			5.55078e-06	5	2.14814e-05	14	3.58097e-05	11	3.48475e-06	3	2.16686e-05	9	5.01125e-06	6	1.93509e-05	11	3.14957e-06	3	2.45808e-06	2	2.39845e-06	2	7.82216e-07	2	1.88051e-05
enzyme_ec	1.2.1.8	oxidoreductases acting on the aldehyde or oxo group of donors with nad+ or nadp+ as acceptor betaine-aldehyde dehydrogenase			1.90395e-06	2	4.67916e-05	18	0.000249055	23	1.9327e-06	2	1.12287e-05	5	6.48003e-06	3	9.82169e-06	8			1.0145e-05	5	1.69456e-05	9			7.24168e-06	5	6.4502e-05	26	3.74491e-06	3			1.38004e-06	2	4.18718e-05	14	4.12572e-05	17	7.61042e-05	17	7.71697e-07	1	1.10676e-06	2			2.349e-05
enzyme_ec	1.2.1.81	oxidoreductases acting on the aldehyde or oxo group of donors with nad+ or nadp+ as acceptor sulfoacetaldehyde dehydrogenase (acylating)	0.000289165	34	0.000210837	32	0.000216389	30	0.000293992	39	0.000331918	33	0.000152294	30	0.000294723	49	0.000170862	25	0.000229139	39	0.000537832	42	0.000230895	34	2.63246e-05	7	4.64094e-05	13	0.000209915	36	0.000329553	36	0.000103848	21	9.80107e-06	8	0.000191647	42	0.000318754	39	0.000263174	48	0.000108157	25	0.000219714	31	3.44513e-05	14	0.000239679
enzyme_ec	1.2.1.87	oxidoreductases acting on the aldehyde or oxo group of donors with nad+ or nadp+ as acceptor propanal dehydrogenase (coa-propanoylating)	0.00117711	108	0.00115503	102	0.000923889	92	0.00182118	127	0.00116037	112	0.000930285	116	0.000800751	95	0.000774248	67	0.00142856	109	0.00312325	136	0.000701209	87	0.000887808	96	0.000989142	127	0.000919715	90	0.00131739	89	0.00126586	111	0.00111046	127	0.00088214	124	0.00120529	119	0.000932474	98	0.00118994	117	0.000652209	90	0.000965929	105	0.000778566
enzyme_ec	1.2.1.88	oxidoreductases acting on the aldehyde or oxo group of donors with nad+ or nadp+ as acceptor l-glutamate Î³-semialdehyde dehydrogenase	8.75535e-05	32	0.000159404	54	1.53683e-06	2	1.22935e-05	7	7.91343e-05	30	6.32639e-05	30	0.000216817	65	1.91911e-06	2	2.74566e-05	10	0.000125336	25	4.3734e-05	21	5.03204e-05	27	2.703e-05	16	1.41247e-05	12	2.04977e-05	10	4.82516e-05	27	8.06822e-05	35	1.81163e-05	13	4.40476e-05	21	1.74113e-05	13	4.5513e-05	21	4.96789e-05	23	5.74589e-05	24	1.16626e-05
enzyme_ec	1.2.1.9	oxidoreductases acting on the aldehyde or oxo group of donors with nad+ or nadp+ as acceptor glyceraldehyde-3-phosphate dehydrogenase (nadp+)	2.56613e-05	7							0.000132852	16	8.61575e-06	5	1.58586e-05	6	2.59979e-05	8	7.34534e-06	5			1.75833e-05	6	1.47801e-05	6	4.40498e-06	3	4.62423e-05	9									2.46575e-06	2					3.91234e-06	3	2.29545e-05	7	2.95672e-05
enzyme_ec	1.2.1.90	oxidoreductases acting on the aldehyde or oxo group of donors with nad+ or nadp+ as acceptor glyceraldehyde-3-phosphate dehydrogenase [nad(p)+]	2.56613e-05	7							0.000132852	16	8.61575e-06	5	1.58586e-05	6	2.59979e-05	8	7.34534e-06	5			1.75833e-05	6	1.47801e-05	6	4.40498e-06	3	4.62423e-05	9									2.46575e-06	2					3.91234e-06	3	2.29545e-05	7	2.95672e-05
enzyme_ec	1.2.1.91	oxidoreductases acting on the aldehyde or oxo group of donors with nad+ or nadp+ as acceptor 3-oxo-5,6-dehydrosuberyl-coa semialdehyde dehydrogenase	3.07889e-05	5	0.000153317	16	0.000156782	20	1.63892e-05	5	5.19441e-05	6	6.27982e-05	9	8.70912e-05	9	8.90631e-06	2	2.10603e-05	4	2.19242e-05	7	4.54447e-05	7	3.22536e-05	4	3.87501e-05	6	7.56423e-05	10	2.88892e-05	4	1.43054e-05	4	6.52611e-05	8	3.86529e-05	12	5.01016e-05	9	3.96792e-05	10	2.11282e-05	4	3.76346e-05	7	5.50662e-05	8	0.000127788
enzyme_ec	1.2.3.1	oxidoreductases acting on the aldehyde or oxo group of donors with oxygen as acceptor aldehyde oxidase	6.91089e-07	1	7.89439e-07	1	2.08884e-05	7	2.6255e-05	6			4.77207e-06	2	2.52705e-06	2	2.88718e-06	2			2.62925e-05	8	1.3049e-05	4	2.27616e-06	2			4.60726e-06	3	4.32949e-06	2	7.21009e-06	4	1.19161e-06	1	1.65953e-06	2	7.08313e-06	4	3.11592e-06	3	4.51992e-06	3	2.7324e-05	8	1.90307e-06	2	5.98958e-06
enzyme_ec	1.2.4.1	oxidoreductases acting on the aldehyde or oxo group of donors with a disulfide as acceptor pyruvate dehydrogenase (acetyl-transferring)	8.17355e-06	1			3.11888e-05	10			4.56881e-05	14	1.01168e-05	5			1.28322e-05	6			1.39866e-06	1	5.23796e-05	11	2.66901e-05	8	2.89847e-05	12	1.82132e-05	7	3.58576e-05	10	1.05364e-05	6			3.22329e-05	13	2.84835e-06	1	3.19697e-05	9	5.30914e-06	4	2.696e-05	16	9.67811e-06	7	3.76632e-05
enzyme_ec	1.2.4.4	oxidoreductases acting on the aldehyde or oxo group of donors with a disulfide as acceptor 3-methyl-2-oxobutanoate dehydrogenase (2-methylpropanoyl-transferring)	2.4277e-06	2	2.4548e-06	4			1.24698e-05	3	4.05347e-05	10	2.0801e-06	2							3.52376e-05	16	2.04015e-06	1	2.88179e-06	2	2.65437e-06	2	1.81129e-06	1	4.52318e-06	2	3.29196e-07	1	4.6444e-07	1			8.3453e-06	3	2.90747e-05	12	3.9306e-06	4	1.00988e-06	1	7.36765e-07	1	1.57276e-05
enzyme_ec	1.2.5.1	oxidoreductases acting on the aldehyde or oxo group of donors with a quinone or similar compound as acceptor pyruvate dehydrogenase (quinone)	1.21613e-06	1																	2.77487e-06	2
enzyme_ec	1.2.5.3	oxidoreductases acting on the aldehyde or oxo group of donors with a quinone or similar compound as acceptor aerobic carbon monoxide dehydrogenase	6.46057e-05	11	7.60966e-05	23	1.3167e-05	8	0.00019861	14	0.000106597	15	6.36019e-05	13	7.6712e-05	17	7.33339e-05	13	6.05208e-05	10	0.000426508	38	7.05037e-05	13	1.78145e-05	8	7.21318e-05	16	5.5439e-05	11	8.71818e-05	9	5.20146e-05	13	3.68537e-05	19	4.93898e-05	16	0.000134874	22	2.41981e-05	9	7.13516e-05	20	6.28253e-05	12	4.02161e-05	17	7.69086e-05
enzyme_ec	1.2.7.-		0.0198057	1120	0.0174078	1388	0.0130682	976	0.0123402	1094	0.0183801	994	0.0134017	1086	0.0174249	1200	0.0137069	767	0.0160282	878	0.00852002	924	0.0163956	1298	0.0120898	844	0.0146181	1243	0.0174553	1079	0.0157892	937	0.0188536	1318	0.0169519	1430	0.0171934	1248	0.0161814	1200	0.0191615	1282	0.0149117	1193	0.0183874	1105	0.0149704	1274	0.0179503
enzyme_ec	1.2.7.1	oxidoreductases acting on the aldehyde or oxo group of donors with an iron-sulfur protein as acceptor pyruvate synthase	0.0198649	1144	0.0175755	1412	0.0134263	1047	0.0124807	1120	0.0184804	1019	0.0134715	1104	0.0177155	1233	0.0138168	803	0.016274	900	0.00881598	991	0.0165609	1351	0.0121269	856	0.0151331	1323	0.0176117	1103	0.0163695	1020	0.0189851	1365	0.016975	1447	0.0177466	1304	0.0163635	1261	0.0194161	1319	0.0149848	1213	0.0184096	1116	0.0149955	1292	0.0180811
enzyme_ec	1.2.7.11	oxidoreductases acting on the aldehyde or oxo group of donors with an iron-sulfur protein as acceptor 2-oxoacid oxidoreductase (ferredoxin)	0.000551212	127	0.000486701	130	0.000137106	52	0.000290616	64	0.000373395	90	0.000474713	122	0.000662701	126	0.000196477	57	0.000458131	82	0.000915926	162	0.000500911	112	0.000452781	99	0.000651413	128	0.00030071	76	0.000404393	89	0.000359902	106	0.000657501	144	0.000303515	88	0.000435051	129	0.000583805	102	0.00051004	135	0.000184494	60	0.0006553	149	0.000277719
enzyme_ec	1.2.7.12	oxidoreductases acting on the aldehyde or oxo group of donors with an iron-sulfur protein as acceptor formylmethanofuran dehydrogenase					7.91701e-05	23													0.00186995	84	0.00014418	37			0.000153908	38			0.000418774	42	2.71833e-05	3							9.7121e-05	33	0.000216645	35	1.75863e-06	2			1.13859e-05
enzyme_ec	1.2.7.3	oxidoreductases acting on the aldehyde or oxo group of donors with an iron-sulfur protein as acceptor 2-oxoglutarate synthase	0.000820245	173	0.000843574	195	0.000505142	114	0.00120701	151	0.000499424	126	0.000750529	183	0.000922295	173	0.000354166	81	0.000565337	115	0.00141459	227	0.000955945	181	0.000574941	132	0.00123699	204	0.000508649	115	0.00102292	155	0.000837462	169	0.000843815	195	0.000488196	128	0.000905373	209	0.00128904	186	0.00108615	213	0.00046132	116	0.000957026	208	0.000526561
enzyme_ec	1.2.7.4	oxidoreductases acting on the aldehyde or oxo group of donors with an iron-sulfur protein as acceptor anaerobic carbon monoxide dehydrogenase	0.00284022	138	0.00255132	151	0.00218323	140	0.00229517	129	0.00217326	103	0.00167753	106	0.00172834	125	0.00158653	85	0.00186408	110	0.00336769	149	0.00271691	187	0.00226207	131	0.00238553	156	0.00161658	89	0.00192852	109	0.00246028	139	0.00307638	177	0.00116811	110	0.00179716	149	0.00224848	164	0.00186561	113	0.00237614	146	0.0032398	158	0.00150818
enzyme_ec	1.2.7.5	oxidoreductases acting on the aldehyde or oxo group of donors with an iron-sulfur protein as acceptor aldehyde ferredoxin oxidoreductase	4.58497e-05	23	0.000187442	59	0.00014946	54	0.000259222	57	9.28699e-05	17	5.47361e-05	26	0.000315985	36	0.000308339	43	0.000199185	22	0.000480544	67	0.000162634	31	0.000127751	37	9.48556e-05	40	0.000154823	35	0.000267744	59	7.31633e-05	30	5.46162e-05	27	0.000231401	53	0.000363592	47	0.00026129	66	0.000242023	48	9.67642e-05	32	0.000296613	58	0.000223299
enzyme_ec	1.2.7.7	oxidoreductases acting on the aldehyde or oxo group of donors with an iron-sulfur protein as acceptor 3-methyl-2-oxobutanoate dehydrogenase (ferredoxin)	0.000892829	118	0.000812866	152	0.000944115	134	0.00204818	158	0.000346286	74	0.000559386	111	0.000665177	118	0.00046861	60	0.00034493	61	0.00133707	165	0.00111446	151	0.000257807	61	0.0011727	149	0.000585599	92	0.0013178	110	0.00109164	129	0.000479744	110	0.000482469	103	0.000933357	148	0.00140877	167	0.00102548	141	0.000842439	126	0.000791365	148	0.000701246
enzyme_ec	1.2.7.8	oxidoreductases acting on the aldehyde or oxo group of donors with an iron-sulfur protein as acceptor indolepyruvate ferredoxin oxidoreductase	0.000380011	120	0.000286749	127	0.000291924	85	0.00065366	110	0.000259057	94	0.000238065	83	0.000460727	114	0.000221247	77	0.000285105	81	0.000923948	179	0.000352888	118	0.000162064	62	0.000417241	153	0.000206246	84	0.000361377	89	0.000479583	140	0.000293227	105	0.000134448	72	0.000469201	142	0.000407795	123	0.000432987	128	0.000278625	84	0.000208854	102	0.00017461
enzyme_ec	1.2.99.7	oxidoreductases acting on the aldehyde or oxo group of donors with unknown physiological acceptors aldehyde dehydrogenase (fad-independent)	0.000981625	48	0.000486981	34	0.000309898	40	0.000521342	33	0.000966687	47	0.000839917	49	0.000245486	21	9.42699e-05	5	0.000159931	12	0.000891964	41	0.00188669	84	0.000119278	8	0.000460192	36	0.000219772	20	0.00057563	34	0.000704423	50	0.000747472	54	0.00063688	74	0.00104467	69	0.000113696	15	0.000375749	32	0.00131106	54	0.00133127	66	0.00016424
enzyme_ec	1.20.4.1	oxidoreductases acting on phosphorus or arsenic in donors with disulfide as acceptor arsenate reductase (glutathione/glutaredoxin)	2.683e-06	2	4.27469e-06	4	0	0	1.29673e-05	2	1.50793e-05	2	1.36828e-05	7	3.57018e-06	3	3.45961e-05	2	1.04617e-05	4	1.27315e-06	1			1.22716e-06	1			6.83875e-06	3	1.76587e-06	2	5.23353e-06	5	9.34912e-06	7	2.24339e-05	10					6.07444e-06	3	1.41927e-07	1	5.00599e-06	2	3.18714e-06
enzyme_ec	1.21.4.-		7.03286e-05	22	3.75188e-06	4							4.80295e-07	1	4.43268e-05	14	1.69057e-06	2	5.71985e-06	5	3.11102e-05	11									0	0					2.76259e-05	13			0	0			6.81301e-06	6			7.22868e-06
enzyme_ec	1.21.4.1	oxidoreductases catalysing the reaction x-h + y-h = x-y with a disulfide as acceptor d-proline reductase	3.01265e-05	5	8.91348e-06	3	1.32428e-05	2							2.8036e-05	7	0	0	3.37583e-05	1					2.14957e-05	3	1.56019e-05	6							2.86343e-05	8	2.65205e-06	1	2.01739e-05	2			1.58059e-05	4	6.20888e-06	4
enzyme_ec	1.21.4.2	oxidoreductases catalysing the reaction x-h + y-h = x-y with a disulfide as acceptor glycine reductase	8.21941e-05	25	0.000156291	20	0.00013377	23	0.00029758	21	0.000172677	14	9.21788e-05	10	0.000142265	29	0.000132845	13	0.000102275	19	0.000143576	29	3.44962e-05	8	9.42015e-05	12	2.82705e-05	6	0.000191541	12	0.00028583	23	0.000194648	20	2.85961e-05	10	0.000108099	32	6.50148e-05	13	0.000172846	23	0.000195217	25	0.000166962	28	0.00019083	20	0.000381114
enzyme_ec	1.21.4.3	oxidoreductases catalysing the reaction x-h + y-h = x-y with a disulfide as acceptor sarcosine reductase	7.11453e-05	23	5.05997e-06	5	3.25324e-06	1					4.41375e-06	2	4.43268e-05	14	1.69057e-06	2	5.71985e-06	5	3.11102e-05	11									0	0	6.2367e-07	1			2.76259e-05	13			0	0			8.05102e-06	7			7.22868e-06
enzyme_ec	1.21.4.4	oxidoreductases catalysing the reaction x-h + y-h = x-y with a disulfide as acceptor betaine reductase	7.11453e-05	23	5.05997e-06	5							4.80295e-07	1	4.43268e-05	14	1.69057e-06	2	5.71985e-06	5	3.11102e-05	11									0	0					2.76259e-05	13			0	0			8.05102e-06	7			7.22868e-06
enzyme_ec	1.21.98.3	oxidoreductases catalysing the reaction x-h + y-h = x-y with other, known, physiological acceptors anaerobic magnesium-protoporphyrin ix monomethyl ester cyclase	5.58159e-06	6	1.45933e-05	13	6.92263e-06	6	7.05925e-06	1	2.61773e-05	19	6.38397e-06	5	1.37917e-05	12	1.145e-05	9	1.79908e-05	7			1.58843e-05	7	1.03052e-06	1	3.46503e-06	4	1.0788e-05	8	9.3803e-06	6	6.95456e-06	9	8.73065e-06	9	5.65649e-06	6	3.14699e-05	5	1.25068e-05	11	6.59003e-06	6	7.75122e-06	6	5.09112e-06	5	3.48028e-05
enzyme_ec	1.3.1.-		3.72327e-05	10	3.22583e-05	14	2.93659e-06	4	4.37613e-05	9	7.69839e-05	18	4.10534e-05	17	0.000104165	25	0.000117417	28	5.82816e-05	15	4.98773e-05	8	1.64201e-05	7	6.37031e-05	15	7.29651e-05	28	7.2572e-05	18	0.000482784	53	9.7693e-05	17	4.40181e-05	15	3.66837e-05	15	4.14327e-05	19	7.51994e-05	13	8.13737e-06	5	3.9554e-05	7	1.82503e-05	7	9.87102e-06
enzyme_ec	1.3.1.1	oxidoreductases acting on the ch-ch group of donors with nad+ or nadp+ as acceptor dihydropyrimidine dehydrogenase (nad+)	0.000542186	32	4.81508e-05	22	0.000148467	35	0.000228381	34	3.68095e-05	12	4.66754e-05	19	0.000162165	24	0.000100621	21	0.00022569	41	0.000632635	48	4.88662e-05	18	4.45833e-05	21	8.53163e-05	27	0.000416889	31	0.000378084	45	0.000184298	33	8.40854e-05	38	1.48901e-05	11	0.000112949	24	0.000100607	39	0.000107864	30	0.000102301	35	5.21868e-05	23	6.63187e-05
enzyme_ec	1.3.1.10	oxidoreductases acting on the ch-ch group of donors with nad+ or nadp+ as acceptor enoyl-[acyl-carrier-protein] reductase (nadph, si-specific)	0.000130576	25	0.00021709	29	0.000251277	26	0.000104481	25	0.000142305	27	0.000207205	31	0.000223126	35	5.80906e-05	24	0.000108653	19	9.64364e-05	21	0.000121388	23	0.000128809	28	0.000152051	28	0.000276528	23	0.000107021	18	0.000136294	26	0.00011596	22	0.000107669	29	0.000184739	36	0.000110518	29	6.5762e-05	17	0.000138143	25	0.000111077	28	0.000150823
enzyme_ec	1.3.1.101	oxidoreductases acting on the ch-ch group of donors with nad+ or nadp+ as acceptor 2,3-bis-o-geranylgeranyl-sn-glycerol 1-phosphate reductase [nad(p)h]					7.66285e-07	1													9.92355e-05	14	6.63903e-06	3			6.81964e-06	4			2.79926e-05	6					3.68235e-05	11			4.84421e-06	3	1.10273e-05	6					1.4754e-06
enzyme_ec	1.3.1.108	oxidoreductases acting on the ch-ch group of donors with nad+ or nadp+ as acceptor caffeoyl-coa reductase	0.00381978	318	0.00352678	380	0.00363775	348	0.00319026	315	0.00534839	353	0.00396444	394	0.00391772	324	0.00457778	292	0.00349951	324	0.00252891	249	0.00444663	359	0.00532382	358	0.00338286	350	0.0058646	367	0.00415472	276	0.00407683	349	0.00427108	418	0.00515684	391	0.00397333	345	0.00496318	332	0.00442418	422	0.00421112	282	0.00348588	387	0.00423499
enzyme_ec	1.3.1.110	Transferred to 1.1.1.436	0.0010115	83	0.00070068	82	0.00112916	85	0.000396318	65	0.00126002	104	0.00162912	122	0.000478082	52	0.00107198	81	0.00107413	69	0.00133681	91	0.000719483	71	0.00164006	95	0.000583937	67	0.00148412	110	0.00144067	84	0.00128477	84	0.00107606	97	0.000800744	87	0.000399416	55	0.000985111	86	0.00138635	112	0.000677834	78	0.000522629	65	0.00103694
enzyme_ec	1.3.1.114	oxidoreductases acting on the ch-ch group of donors with nad+ or nadp+ as acceptor 3-dehydro-bile acid Î´4,6-reductase	1.3751e-05	5	3.08439e-07	1	1.88437e-06	3	1.53918e-05	2	1.84355e-05	9	3.84425e-06	3	3.53516e-06	2	4.59581e-06	3	3.36498e-06	2	1.93719e-06	1	1.56009e-06	1	1.07251e-05	3	6.04487e-07	1			1.03857e-05	5	2.49708e-06	3	1.47323e-06	1	4.4011e-06	4	2.31705e-05	6	1.38575e-05	5	2.87323e-06	2	2.25386e-06	1	5.61119e-06	6	3.60062e-06
enzyme_ec	1.3.1.115	oxidoreductases acting on the ch-ch group of donors with nad+ or nadp+ as acceptor 3-oxocholoyl-coa 4-desaturase	7.31058e-05	16	0.000116373	17	1.30112e-05	5	0.000264984	24	1.28259e-06	2	7.44388e-05	23	2.6799e-05	10	8.74535e-05	17			4.0888e-05	10	5.01373e-05	12	2.97774e-06	2	5.68869e-05	14	2.21313e-05	6	0.000115413	18	4.84748e-05	12			0.000163941	27	1.74376e-06	2	0.000182365	25	0.00015279	20	3.37592e-05	10	0.000147066	32	4.41706e-06
enzyme_ec	1.3.1.116	oxidoreductases acting on the ch-ch group of donors with nad+ or nadp+ as acceptor 7Î²-hydroxy-3-oxochol-24-oyl-coa 4-desaturase	2.4576e-05	11	6.11801e-05	21	0	0	0.000140888	25			3.78775e-05	12	8.97087e-06	4	4.00165e-05	11	4.07082e-06	2	0.000131093	22	6.75983e-05	19	2.75223e-05	8	5.16135e-05	17	7.23963e-06	4	0.000119992	22	7.89774e-05	19	1.18261e-06	1	0.000111583	29	2.81571e-05	14	0.000115436	25	0.000131967	25	2.25528e-05	11	0.000108395	28	4.86412e-05
enzyme_ec	1.3.1.12	oxidoreductases acting on the ch-ch group of donors with nad+ or nadp+ as acceptor prephenate dehydrogenase	2.59165e-05	15	3.21679e-05	23	2.41744e-05	7	0.000115054	2	8.6719e-05	34	4.35991e-05	18	3.36999e-05	23	1.79409e-05	12	2.9783e-05	16	3.83411e-05	9	2.17713e-05	10	2.85848e-05	11	4.16662e-05	23	3.63692e-05	17	1.95609e-05	9	3.99702e-05	24	4.4272e-05	24	2.73669e-05	15	2.25625e-05	15	2.03928e-05	19	6.63181e-06	6	2.02198e-05	12	5.85805e-05	26	3.17886e-05
enzyme_ec	1.3.1.124	oxidoreductases acting on the ch-ch group of donors with nad+ or nadp+ as acceptor 2,4-dienoyl-coa reductase [(3e)-enoyl-coa-producing]			3.2896e-06	3	9.36952e-06	4	1.21096e-06	1	5.61426e-07	1	2.66893e-06	2	5.10689e-07	1	9.63945e-06	4	4.28687e-07	1	1.61137e-05	6	7.82487e-06	4			4.71404e-07	1	5.7104e-07	1	2.31208e-06	2	1.62926e-05	7			4.84696e-07	1	9.83052e-06	4	3.49432e-07	1	6.18406e-07	1	2.69203e-05	7	2.57872e-06	2	1.1446e-05
enzyme_ec	1.3.1.14	oxidoreductases acting on the ch-ch group of donors with nad+ or nadp+ as acceptor dihydroorotate dehydrogenase (nad+)	2.85873e-05	11	2.04622e-05	13	6.71934e-06	5	2.61451e-06	2	1.47357e-05	11	2.31737e-05	10	3.74142e-05	13	1.69455e-05	9	3.6501e-05	18	5.26031e-05	14	1.3428e-05	9	1.89776e-05	10	3.80624e-05	21	1.24021e-05	8	1.32371e-05	4	4.52827e-05	19	3.47851e-05	25	9.98541e-06	6	1.33736e-05	7	3.5774e-06	3	2.13925e-05	9	2.37641e-05	12	2.21681e-05	12	3.40851e-05
enzyme_ec	1.3.1.34	oxidoreductases acting on the ch-ch group of donors with nad+ or nadp+ as acceptor 2,4-dienoyl-coa reductase [(2e)-enoyl-coa-producing]	0.000127082	22	9.60609e-05	26	2.9333e-05	12	1.21096e-06	1	0.000107817	31	2.28333e-05	12	0.000197142	28	5.6728e-05	15	5.25452e-05	21	5.64046e-05	19	0.000101849	30	2.26337e-05	12	1.2992e-05	6	2.77738e-05	11	1.46473e-05	5	5.71377e-05	22			4.84696e-07	1	0.000128027	26	4.33594e-05	15	9.04706e-06	5	0.000118123	28	1.12621e-05	5	6.32948e-05
enzyme_ec	1.3.1.43	oxidoreductases acting on the ch-ch group of donors with nad+ or nadp+ as acceptor arogenate dehydrogenase	1.52734e-05	9	6.19195e-06	6	6.84073e-06	5	0.000114471	1	4.19812e-05	18	2.47124e-05	10	4.91813e-06	5	9.50197e-06	7	1.96582e-05	11	2.77402e-05	4	1.53615e-06	1	9.74882e-06	4	2.65392e-06	1	1.04905e-05	6	4.45615e-06	3	3.15072e-06	4	1.13821e-05	7			1.27956e-06	2	2.62524e-06	4	3.45565e-06	2			1.6912e-05	9	1.31472e-05
enzyme_ec	1.3.1.44	oxidoreductases acting on the ch-ch group of donors with nad+ or nadp+ as acceptor trans-2-enoyl-coa reductase (nad+)	1.20292e-05	6	2.80042e-05	12	4.28901e-05	17	0	0	1.44898e-05	6	3.3054e-05	12	5.78428e-06	4	3.32042e-05	11	1.79403e-05	7	1.12784e-05	4	2.85275e-05	8	1.76904e-05	5			2.05377e-05	9	3.05169e-05	7	6.78445e-05	18	5.0644e-06	3	9.6921e-05	21	1.18369e-05	6	1.28769e-05	5	3.16011e-05	12	1.51044e-06	1	5.93584e-06	4	3.44383e-06
enzyme_ec	1.3.1.76	oxidoreductases acting on the ch-ch group of donors with nad+ or nadp+ as acceptor precorrin-2 dehydrogenase			2.86493e-06	4	3.54626e-06	3			5.30597e-06	3			4.47807e-06	1	2.97255e-06	2	1.63894e-06	1	2.04274e-05	6	2.34199e-05	7					3.18524e-06	4	2.9771e-06	2	1.07692e-06	2			1.30641e-06	2	8.35449e-06	3	3.88207e-07	1							5.08158e-07
enzyme_ec	1.3.1.9	oxidoreductases acting on the ch-ch group of donors with nad+ or nadp+ as acceptor enoyl-[acyl-carrier-protein] reductase (nadh)	0.000218926	55	0.000347159	82	0.000375337	73	0.000159354	35	0.000262055	64	0.000336043	76	0.000481958	108	0.000264659	78	0.000323219	70	0.000141597	38	0.00023523	58	0.000192274	53	0.00025205	64	0.0004828	79	0.000249148	37	0.000267114	68	0.000253844	71	0.000283782	80	0.00026326	68	0.000294745	73	0.000148617	49	0.00022959	48	0.00018307	63	0.000279891
enzyme_ec	1.3.1.95	oxidoreductases acting on the ch-ch group of donors with nad+ or nadp+ as acceptor acrylyl-coa reductase (nadh)	3.02957e-06	2	0	0	5.24523e-05	8	1.49277e-05	3	2.82455e-05	1							1.31671e-06	2	5.88447e-05	7							1.17208e-06	1	1.61984e-05	4	2.80249e-06	2					2.43459e-05	5	3.02269e-05	7			2.84516e-06	1
enzyme_ec	1.3.1.98	oxidoreductases acting on the ch-ch group of donors with nad+ or nadp+ as acceptor udp-n-acetylmuramate dehydrogenase	3.02531e-05	16	3.51267e-05	24	1.63812e-05	11	4.39668e-05	6	5.51232e-05	24	4.24783e-05	21	2.66599e-05	17	4.66198e-05	23	5.08148e-05	31	1.38837e-05	7	7.02537e-06	6	1.70191e-05	10	1.74062e-05	15	3.39108e-05	17	3.73768e-05	13	2.89877e-05	22	2.91546e-05	21	3.1648e-05	16	1.25227e-05	9	6.19864e-05	25	2.47797e-05	16	3.8345e-05	16	1.17806e-05	9	6.92736e-05
enzyme_ec	1.3.3.15	oxidoreductases acting on the ch-ch group of donors with oxygen as acceptor coproporphyrinogen iii oxidase (coproporphyrin-forming)			5.14949e-06	7	7.68169e-06	7	3.77951e-06	2	1.49206e-05	7	4.46546e-05	21	8.9962e-05	34	0.000140631	21	8.11464e-05	19	2.69283e-06	3	4.18678e-05	15	1.63574e-06	2	7.21675e-05	19	7.3576e-05	21	0.000214467	22	0.000186086	50	2.25647e-05	16	7.79425e-05	30	8.69985e-05	25	7.45182e-05	24	6.52389e-05	22	1.29577e-05	6	2.61861e-06	3	0.000201103
enzyme_ec	1.3.3.3	oxidoreductases acting on the ch-ch group of donors with oxygen as acceptor coproporphyrinogen oxidase	1.29476e-05	6	1.62922e-05	9	3.74765e-05	9	5.98192e-05	9	1.85456e-05	5	2.00848e-05	5	1.94659e-05	6	5.06326e-06	2	1.11343e-06	1	5.58784e-05	13	1.33258e-05	5	6.70426e-06	3	1.68705e-06	1	9.05798e-06	3	3.41143e-05	6	2.12804e-05	8	4.71063e-06	3	1.44862e-05	6	2.20522e-05	8	2.07629e-05	8	1.78898e-05	4	1.81072e-05	6	1.19188e-05	5	2.95683e-05
enzyme_ec	1.3.3.4	oxidoreductases acting on the ch-ch group of donors with oxygen as acceptor protoporphyrinogen oxidase			5.14949e-06	7	7.68169e-06	7	3.77951e-06	2	1.49206e-05	7	4.46546e-05	21	8.9962e-05	34	0.000140631	21	8.11464e-05	19	2.69283e-06	3	4.18678e-05	15	1.63574e-06	2	7.21675e-05	19	7.3576e-05	21	0.000214467	22	0.000186086	50	2.25647e-05	16	7.79425e-05	30	8.69985e-05	25	7.45182e-05	24	6.52389e-05	22	1.29577e-05	6	2.61861e-06	3	0.000201103
enzyme_ec	1.3.4.1	oxidoreductases acting on the ch-ch group of donors with a disulfide as acceptor fumarate reductase (com/cob)	0.000725775	74	0.000766478	107	0.000346664	68	0.000568167	75	0.000713184	85	0.000445161	70	0.000431509	70	0.00041176	56	0.000824354	82	0.000468309	68	0.000473489	72	0.000523427	78	0.000866571	119	0.000280233	51	0.000518529	55	0.000599589	105	0.000851497	115	0.00053329	93	0.000350698	60	0.000509202	89	0.000707669	91	0.000193421	48	0.00093518	119	0.000289877
enzyme_ec	1.3.5.1	oxidoreductases acting on the ch-ch group of donors with a quinone or related compound as acceptor succinate dehydrogenase	0.00147366	133	0.00179454	161	0.00271267	140	0.0031424	177	0.000605336	89	0.00166172	157	0.00170169	139	0.000624035	80	0.00124808	106	0.00161227	182	0.00125079	145	0.0010999	131	0.0022538	209	0.00137186	122	0.00540145	211	0.000847096	139	0.00170281	154	0.000988655	120	0.00169259	187	0.00133248	184	0.00161894	178	0.00147537	160	0.00164278	170	0.00331463
enzyme_ec	1.3.5.2	oxidoreductases acting on the ch-ch group of donors with a quinone or related compound as acceptor dihydroorotate dehydrogenase (quinone)													2.67129e-06	3															1.65736e-06	1	4.72157e-07	1
enzyme_ec	1.3.5.3	oxidoreductases acting on the ch-ch group of donors with a quinone or related compound as acceptor protoporphyrinogen ix dehydrogenase (quinone)			6.84385e-06	4	1.26537e-06	1	1.00756e-05	5	0	0	1.24657e-05	7	7.29056e-06	3	2.46465e-06	1	7.54023e-06	4	3.23665e-06	2	5.48669e-06	3	4.92615e-06	3	9.73124e-07	1	6.00827e-06	3			1.23831e-06	2	5.30523e-06	4	8.55517e-06	4			6.76644e-06	6			2.81237e-06	1	3.47954e-06	3	3.03948e-05
enzyme_ec	1.3.5.4	Transferred to 1.3.5.1	0.000271334	50	0.000225313	46	0.000147864	31	0.000219896	56	0.000330041	70	0.000116372	36	0.000217396	53	0.000124768	42	0.000132022	40	0.00036953	68	0.0002201	48	0.000185918	45	0.000374988	67	0.000106492	31	0.000344709	58	0.000279821	66	0.000478024	68	0.000887618	93	0.000118481	43	0.000117859	38	0.000715183	91	0.000186897	47	0.000449061	77	0.000117498
enzyme_ec	1.3.7.11	oxidoreductases acting on the ch-ch group of donors with an iron-sulfur protein as acceptor 2,3-bis-o-geranylgeranyl-sn-glycero-phospholipid reductase					7.66285e-07	1													9.92355e-05	14	6.63903e-06	3			6.81964e-06	4			2.79926e-05	6					3.68235e-05	11			4.84421e-06	3	1.10273e-05	6					1.4754e-06
enzyme_ec	1.3.7.8	oxidoreductases acting on the ch-ch group of donors with an iron-sulfur protein as acceptor benzoyl-coa reductase	0.000250292	65	0.000184767	55	0.00024361	78	0.000527007	105	9.54473e-05	36	0.00020307	56	7.3433e-05	39	0.000250229	47	0.000116691	38	0.000883304	99	0.000457761	103	8.14439e-05	28	0.000483599	124	0.000117081	43	0.000328426	80	0.000535991	108	8.7624e-05	42	0.000239182	70	0.000259701	88	0.000734883	156	0.000616278	109	0.000148454	49	0.000291261	87	0.000258568
enzyme_ec	1.3.8.-		4.26225e-05	9	0.000113748	21	8.8063e-05	13	0.000208586	22	0.000145925	21	0.000121947	19	5.36265e-05	12	6.91589e-05	15	2.61425e-05	7	0.000108919	12	3.13431e-05	8	1.44836e-05	7	1.84278e-05	6	9.45376e-05	20					1.28514e-05	7	3.98625e-05	14	0.000229011	27			4.84816e-05	9	0.000109035	22	1.44926e-05	6	0.000134557
enzyme_ec	1.3.8.1	oxidoreductases acting on the ch-ch group of donors with a flavin as acceptor short-chain acyl-coa dehydrogenase	0.00571853	339	0.00449595	382	0.00598686	430	0.0081406	416	0.00615247	331	0.005912	413	0.00523579	342	0.00516613	279	0.0048515	264	0.0124876	497	0.00596847	361	0.00713927	351	0.0049892	376	0.0072922	393	0.00760433	393	0.00580631	388	0.00641367	474	0.00664654	405	0.00703858	382	0.0074308	378	0.00626978	429	0.00530132	298	0.00555609	408	0.00635838
enzyme_ec	1.3.8.13	oxidoreductases acting on the ch-ch group of donors with a flavin as acceptor crotonobetainyl-coa reductase	9.41879e-06	2	9.22031e-06	6			7.89198e-06	2	1.97539e-06	1	2.44156e-05	7	1.45273e-05	5	1.61041e-06	2	1.97436e-06	1	2.71445e-06	2	1.01408e-05	5	8.61987e-06	3	3.84947e-06	2	6.51395e-06	3	3.2216e-06	1	1.24362e-05	5	1.33349e-05	7	7.37644e-06	2			4.41011e-06	4	5.82576e-06	2	4.33072e-06	2	1.97495e-05	5
enzyme_ec	1.3.8.16	oxidoreductases acting on the ch-ch group of donors with a flavin as acceptor 2-amino-4-deoxychorismate dehydrogenase	9.46664e-05	30	8.27269e-05	28	4.15379e-05	14	2.91381e-05	10	0.00011806	23	5.49465e-05	18	9.01538e-05	20	5.76149e-05	14	0.000129675	30	0.000302052	49	6.89753e-05	17	6.56454e-05	14	6.55779e-05	23	6.22978e-05	25	1.42271e-05	6	9.96582e-05	29	0.000187939	53	3.08572e-05	18	4.46437e-05	17	8.20103e-05	26	5.11769e-05	18	4.993e-05	20	6.18616e-05	22	7.51797e-05
enzyme_ec	1.3.8.7	oxidoreductases acting on the ch-ch group of donors with a flavin as acceptor medium-chain acyl-coa dehydrogenase	2.50704e-05	6	8.09971e-05	16	5.61704e-05	13	0.00020582	15	7.32564e-05	10	0.000187994	20	6.1029e-05	12	7.61445e-05	13	9.88972e-06	4	0.000422405	21	0.00031543	22	4.8308e-05	7			7.92514e-05	13	1.83471e-06	1	3.95185e-05	8	2.0051e-05	7	8.68163e-05	16	0.000142991	19	4.60023e-05	10	8.82153e-05	15	7.26722e-05	10	1.96592e-05	6	1.62386e-05
enzyme_ec	1.3.8.9	oxidoreductases acting on the ch-ch group of donors with a flavin as acceptor very-long-chain acyl-coa dehydrogenase	1.25412e-06	1	1.4564e-05	8	5.99445e-05	14	2.01758e-05	5	4.56939e-06	3	3.97204e-05	11	1.11452e-05	7	2.23378e-05	8			7.05325e-05	13	4.72532e-05	13	2.7783e-06	2	1.09521e-05	7	3.47666e-06	2	4.27478e-05	11	2.63584e-05	11	1.39908e-05	7	3.32413e-06	3	7.96244e-05	16	1.91495e-05	8	1.1912e-05	5	5.00447e-05	13	1.03583e-05	6	4.00752e-05
enzyme_ec	1.3.98.1	oxidoreductases acting on the ch-ch group of donors with other, known, physiological acceptors dihydroorotate dehydrogenase (fumarate)	0.000179028	39	8.72655e-05	28	3.2756e-06	2	2.07299e-05	7	8.01915e-05	27	0.000135579	34	0.000171648	29	6.44895e-05	26	7.18432e-05	25	7.16684e-05	29	8.26357e-05	26	0.00012005	32	0.000335407	37	0.000150435	39	8.13806e-06	6	8.03042e-05	32	0.000172492	40	4.09289e-05	21	0.000165939	36	5.10877e-05	20	5.55583e-05	23	5.26436e-05	18	0.000151255	37	2.08684e-05
enzyme_ec	1.3.98.3	oxidoreductases acting on the ch-ch group of donors with other, known, physiological acceptors coproporphyrinogen dehydrogenase	8.9755e-06	6	6.28816e-06	2	1.28307e-05	1	2.13492e-06	3	1.60369e-05	12	2.85114e-06	2	1.8988e-05	11	1.07648e-05	7	6.15951e-06	4	1.29524e-05	2	7.11223e-06	4	1.43032e-06	1	1.74324e-06	3	7.90846e-05	6	1.72192e-05	6	7.09245e-06	8	2.64455e-05	12	1.93167e-05	6	1.278e-05	6	8.98525e-06	7	1.4467e-06	2	1.13512e-05	7	1.61283e-05	7	8.81289e-07
enzyme_ec	1.3.98.6	oxidoreductases acting on the ch-ch group of donors with other, known, physiological acceptors adomet-dependent heme synthase	0.000401013	63	0.000205551	68	3.30593e-05	14	0.000114844	26	0.000708114	107	0.000129729	34	0.000132777	50	0.000129056	34	0.000174155	33	4.21324e-05	12	0.000335713	80	0.00044246	76	0.000142823	53	0.000322632	61	7.63729e-05	22	0.000228796	55	0.000449014	87	0.000251645	77	0.000106049	34	0.00027695	66	8.19442e-05	28	0.000201609	44	0.000198562	59	0.000407187
enzyme_ec	1.3.99.-		0.00182621	105	0.00117513	116	0.00174311	128	0.00209305	126	0.00220898	153	0.00205556	183	0.00204413	132	0.0019682	121	0.00176034	125	0.00398527	134	0.0020772	131	0.00137968	82	0.000908187	95	0.00200723	132	0.00243587	123	0.00144106	117	0.000961304	114	0.00118233	142	0.00282464	171	0.00219228	150	0.00171019	139	0.00189121	159	0.00117211	108	0.00206249
enzyme_ec	1.3.99.32	oxidoreductases acting on the ch-ch group of donors with unknown physiological acceptors glutaryl-coa dehydrogenase (acceptor)																																							6.89416e-06	2
enzyme_ec	1.3.99.33	oxidoreductases acting on the ch-ch group of donors with unknown physiological acceptors urocanate reductase			2.91823e-05	17	1.17905e-06	1	1.93873e-05	6			1.04061e-06	1	3.26689e-05	8	4.77845e-05	14			3.2467e-05	16	3.28574e-05	6	6.40708e-07	1	8.79249e-07	2			1.23152e-05	6	0.000102761	26	1.02285e-05	8	2.47952e-05	14	8.37021e-06	7	1.63194e-05	9	1.8835e-05	11	7.6629e-07	1	2.75428e-05	13	3.96301e-06
enzyme_ec	1.3.99.4	oxidoreductases acting on the ch-ch group of donors with unknown physiological acceptors 3-oxosteroid 1-dehydrogenase	3.71401e-05	11	5.88845e-05	20	9.97507e-05	19	0.000244338	31	7.70005e-05	22	4.5521e-06	2	1.7913e-05	12	7.87484e-05	18	2.50667e-05	6	0.000284967	27	0.00017733	33	1.28613e-05	7	9.25391e-05	36	0.000163825	32	0.000262006	28	0.000151359	28	0.000159183	31	3.86249e-05	17	0.000287487	37	0.000216733	42	0.000141075	31	4.02684e-05	15	0.00021915	31	0.000169862
enzyme_ec	1.3.99.41	oxidoreductases acting on the ch-ch group of donors with unknown physiological acceptors 3-(methylsulfanyl)propanoyl-coa 2-dehydrogenase	0.00025622	47	0.000278755	51	0.000253747	36	9.66075e-05	23	0.000113503	32	0.000262649	53	0.000295678	46	6.3017e-05	18	0.00016722	35	0.000183591	52	0.000139231	36	0.000185761	35	0.000334852	39	0.000258118	36	6.00284e-05	14	0.000139052	40	0.000312257	62	7.98388e-05	18	0.000206489	45	0.000115164	38	0.000173324	41	0.000279445	46	0.000200563	48	0.000150109
enzyme_ec	1.3.99.5	oxidoreductases acting on the ch-ch group of donors with unknown physiological acceptors 3-oxo-5Î±-steroid 4-dehydrogenase (acceptor)	2.11937e-05	6	4.71345e-05	19	1.04522e-05	3	0.000158218	21	9.78955e-06	4			0.000112431	14	1.80566e-05	7			9.61719e-05	16	0.000106938	14	4.83978e-06	3	5.15646e-05	18	2.40213e-05	12	0.000109349	13	1.63832e-05	10	5.48689e-06	5	2.58785e-05	15	0.000262522	40			3.38382e-05	10	2.57512e-05	10	5.90893e-05	17	9.74555e-05
enzyme_ec	1.4.1.1	oxidoreductases acting on the ch-nh2 group of donors with nad+ or nadp+ as acceptor alanine dehydrogenase	0.00102068	111	0.000591088	88	0.000322792	58	0.000507808	60	0.000442943	66	0.000593814	83	0.000776066	79	0.000228228	51	0.000405064	63	0.000445039	74	0.000221224	52	0.00114569	80	0.000335882	62	0.000386582	61	0.000382937	48	0.000368376	58	0.000480975	79	0.000384273	67	0.000325569	64	0.000507105	74	0.000336303	63	0.000253566	50	0.00074706	109	0.00074253
enzyme_ec	1.4.1.11	oxidoreductases acting on the ch-nh2 group of donors with nad+ or nadp+ as acceptor l-erythro-3,5-diaminohexanoate dehydrogenase	0.000101377	17	1.12393e-05	5					1.97574e-06	1	2.69441e-05	9	3.75173e-05	10	6.4267e-07	1	3.20385e-05	11	0.000119161	17	1.0469e-05	6	5.3433e-06	3	1.09416e-06	1			1.01674e-05	4	1.79783e-05	8	0	0	2.20971e-06	2	6.16741e-06	4	8.05321e-06	4	1.8178e-05	4	2.23402e-06	1	1.72325e-05	7
enzyme_ec	1.4.1.13	oxidoreductases acting on the ch-nh2 group of donors with nad+ or nadp+ as acceptor glutamate synthase (nadph)	0.00205625	346	0.00291609	747	0.00345265	644	0.00137378	235	0.00267918	450	0.00231269	567	0.00332938	735	0.00340507	614	0.00256569	489	0.00149698	363	0.00240821	631	0.00152497	302	0.00445686	948	0.00258614	552	0.00283081	360	0.00273802	587	0.0029205	754	0.00217548	516	0.00246088	587	0.00350432	661	0.00199444	436	0.00248975	492	0.00246764	619	0.00184498
enzyme_ec	1.4.1.14	oxidoreductases acting on the ch-nh2 group of donors with nad+ or nadp+ as acceptor glutamate synthase (nadh)	0.000196054	65	0.000481611	168	0.000385539	129	8.30749e-05	31	0.000579948	143	0.000532928	150	0.0010079	231	0.000949202	195	0.000524446	142	0.000242088	82	0.000497145	164	0.000262134	92	0.000941568	260	0.000505487	150	0.000463853	59	0.000498258	182	0.00067163	236	0.000300632	92	0.000361383	121	0.000519306	132	0.000239791	100	0.000442864	94	0.000392931	139	0.000229181
enzyme_ec	1.4.1.16	oxidoreductases acting on the ch-nh2 group of donors with nad+ or nadp+ as acceptor diaminopimelate dehydrogenase	4.62053e-06	2	0.000102292	15	1.28903e-06	2	3.5873e-05	9	8.14183e-05	17	3.24868e-05	11	1.86157e-05	11	4.47592e-06	3	8.51401e-06	4	5.33613e-05	16	3.32827e-05	8	6.48524e-05	12	3.55111e-06	4	1.49921e-06	1	4.88301e-05	12	6.17379e-05	20	0.000148299	20	1.10848e-05	6	2.46969e-05	12	6.87006e-06	5	1.96165e-05	6	3.68131e-05	10	9.16829e-05	17	4.59144e-06
enzyme_ec	1.4.1.2	oxidoreductases acting on the ch-nh2 group of donors with nad+ or nadp+ as acceptor glutamate dehydrogenase	0.000394843	36	0.00015637	25	8.30266e-05	13	0.000992954	43	7.16794e-06	4	3.76113e-05	17	0.000107446	20	2.04405e-05	6	3.48055e-06	2	1.72124e-05	5	0.000113081	14	6.62216e-06	6	4.1468e-05	15	1.18758e-05	4	9.54576e-05	13	0.000132725	8	3.57494e-05	13	0.00027274	38	0.000168437	15	2.95298e-05	10	1.78001e-05	9	0.0012232	38	0.000123274	25	0.000156386
enzyme_ec	1.4.1.21	oxidoreductases acting on the ch-nh2 group of donors with nad+ or nadp+ as acceptor aspartate dehydrogenase	4.90001e-06	6	5.89359e-07	1					5.2317e-07	1	2.17672e-06	2	1.25917e-06	2	1.61904e-06	2			2.3601e-06	2			5.30982e-07	1	2.41564e-06	2					5.05996e-07	1	1.94791e-06	1	2.93817e-06	2					8.58415e-07	2	2.03126e-06	1	1.68628e-06	1	2.51889e-06
enzyme_ec	1.4.1.28	oxidoreductases acting on the ch-nh2 group of donors with nad+ or nadp+ as acceptor secondary-alkyl amine dehydrogenase [nad(p)+]	8.81086e-06	4	3.053e-05	13	7.41739e-05	14	7.03034e-05	22	5.83937e-05	9	1.23238e-05	8	9.92212e-05	11	4.27023e-05	16	5.0671e-06	1	0.000363102	44	1.77433e-05	10	3.59821e-05	13	5.70609e-05	23	9.97938e-05	21	4.98112e-05	19	2.44039e-05	10	8.33932e-06	5	1.60863e-05	8	0.000227139	51	0.000114637	34	0.000132045	31	1.68588e-05	6	1.1132e-05	8	6.62972e-05
enzyme_ec	1.4.1.4	oxidoreductases acting on the ch-nh2 group of donors with nad+ or nadp+ as acceptor glutamate dehydrogenase (nadp+)	0.0135335	721	0.0136698	884	0.0132721	810	0.0252119	1018	0.0125603	688	0.0128435	914	0.0134763	856	0.0110512	635	0.00931092	627	0.0263165	1084	0.0146001	881	0.0127842	719	0.0133758	948	0.0139556	763	0.0177523	717	0.0143124	841	0.0136381	967	0.0117287	781	0.0200466	1023	0.0163486	941	0.0148325	978	0.0133971	772	0.0129343	944	0.0108957
enzyme_ec	1.4.3.-		1.02654e-06	1	1.18686e-06	1	2.57886e-05	12	1.9557e-06	1	5.13142e-05	10	6.94779e-06	5	1.29401e-05	8	4.07387e-05	12			3.12054e-05	1	3.22861e-05	12	1.33026e-06	1	2.01554e-05	10	5.76885e-05	12			4.55636e-06	4	2.18386e-05	8	8.91984e-07	1	5.82637e-06	5	3.71153e-05	12	0	0			1.8343e-06	1	1.9621e-06
enzyme_ec	1.4.3.16	oxidoreductases acting on the ch-nh2 group of donors with oxygen as acceptor l-aspartate oxidase	7.0379e-05	32	0.000158067	53	0.000152737	37	2.21923e-05	9	0.000111768	47	7.72379e-05	30	0.000190327	54	4.90595e-05	24	4.27651e-05	24	1.29588e-05	9	6.04045e-05	27	3.93148e-05	17	0.000192836	53	0.000124773	40	0.000115486	29	0.000164093	44	0.000101232	48	9.92727e-05	40	8.25122e-05	39	6.36675e-05	33	9.19927e-05	32	9.91099e-05	30	8.56464e-05	36	0.000152183
enzyme_ec	1.4.3.21	oxidoreductases acting on the ch-nh2 group of donors with oxygen as acceptor primary-amine oxidase
enzyme_ec	1.4.3.22	oxidoreductases acting on the ch-nh2 group of donors with oxygen as acceptor diamine oxidase	8.4018e-07	1	6.10016e-06	5	2.24957e-05	8	1.01867e-05	3			1.08053e-06	1	1.34864e-05	7	9.01616e-06	5			2.066e-05	7	1.29967e-06	1			8.71932e-07	1	7.57209e-07	1	1.38754e-05	5	1.24951e-05	4					7.104e-06	4	9.63695e-07	1	3.62222e-06	2	2.86582e-05	10	1.53742e-05	5	2.93225e-06
enzyme_ec	1.4.3.4	oxidoreductases acting on the ch-nh2 group of donors with oxygen as acceptor monoamine oxidase	1.10624e-06	1	4.35553e-05	9	0.000108077	17	4.38682e-05	7	2.367e-06	1	4.63903e-05	11	1.05328e-05	5	5.27861e-05	10	1.30244e-06	1	0.000117861	15	6.75187e-05	11	3.46517e-05	6	5.94392e-05	13	7.52072e-06	3	0.000111204	13	6.75177e-05	12	7.26054e-06	4	4.74305e-06	3	0.000187746	18	6.47908e-05	10	5.94137e-05	14	0.000105121	15	3.16906e-05	8	5.66165e-05
enzyme_ec	1.4.4.2	oxidoreductases acting on the ch-nh2 group of donors with a disulfide as acceptor glycine dehydrogenase (aminomethyl-transferring)	0.000369041	76	0.000248191	76	6.39899e-05	31	0.000449905	103	0.00022224	57	0.000250472	63	0.000523161	86	8.05318e-05	25	0.000152168	35	0.000550678	126	0.000208129	58	0.000203567	47	0.000301543	90	0.000317877	53	0.000270926	72	0.000257115	90	0.000239724	73	0.000173979	64	0.000341792	117	0.000249613	100	0.000233244	86	0.000226108	62	0.000412365	121	0.000112056
enzyme_ec	1.4.7.1	oxidoreductases acting on the ch-nh2 group of donors with an iron-sulfur protein as acceptor glutamate synthase (ferredoxin)	1.26402e-05	10	4.70574e-05	25	9.91705e-06	4	1.15233e-06	1	0.000105805	21	3.50063e-05	18	4.89291e-05	20	3.5776e-05	14	6.16444e-05	29			0.000143717	37	7.19499e-06	3	0.000190549	71	1.18639e-05	8			0.000170846	55	7.91802e-05	39	4.44617e-05	17	1.48858e-06	2	6.92496e-07	1	4.16053e-05	17	1.39155e-05	11	7.25605e-05	26	2.36302e-05
enzyme_ec	1.5.1.-		9.8916e-06	4			0	0			5.49099e-06	3	1.47327e-06	1	9.57336e-07	1			2.39429e-06	2	0	0			1.15889e-06	1	2.57579e-06	1	1.01327e-05	5			2.29018e-06	3	9.81588e-06	7			0	0	2.23545e-06	2			1.68359e-06	1	0	0	2.25053e-06
enzyme_ec	1.5.1.2	oxidoreductases acting on the ch-nh group of donors with nad+ or nadp+ as acceptor pyrroline-5-carboxylate reductase	0.000372621	82	0.000198425	77	0.000147563	46	0.00014318	34	0.00019328	54	0.000155199	53	0.000269846	71	0.000206772	70	0.000166569	58	0.000103654	38	0.000164851	58	0.000102964	39	0.000195151	77	0.000208229	65	9.21286e-05	18	0.00019074	74	0.000173075	72	0.000149539	67	0.000218602	59	0.000237529	78	0.000108741	54	0.000207269	64	0.00019465	74	0.000186983
enzyme_ec	1.5.1.20	oxidoreductases acting on the ch-nh group of donors with nad+ or nadp+ as acceptor methylenetetrahydrofolate reductase [nad(p)h]	0.000163133	16	0.000294649	40	0.000208633	30	0.00010498	10	0.000265612	20	0.000156619	23	0.00021962	33	0.000137146	22	2.46552e-05	4	0.000238837	11	0.000203987	29	0.000223721	21	0.000337767	40	0.000243521	21	9.49086e-05	11	0.000120296	13	0.000147615	35	0.000115428	29	0.000115519	24	7.65759e-05	19	6.5335e-05	15	0.000100256	17	0.000291741	43	0.000178665
enzyme_ec	1.5.1.28	oxidoreductases acting on the ch-nh group of donors with nad+ or nadp+ as acceptor opine dehydrogenase			1.32662e-05	4	1.78056e-05	3	4.09852e-06	2			8.53703e-05	13	1.04024e-05	5	3.90236e-05	10	9.86931e-07	1	3.60087e-05	8	4.89058e-06	2			1.85813e-05	6	1.43381e-06	1	1.15413e-05	2			5.09339e-07	1	3.27708e-06	2	5.80247e-06	2	2.24191e-05	7	3.30555e-06	2	0	0	5.26779e-06	3
enzyme_ec	1.5.1.3	oxidoreductases acting on the ch-nh group of donors with nad+ or nadp+ as acceptor dihydrofolate reductase	4.21729e-05	12	3.40913e-05	19	1.07298e-05	5	0	0	6.02491e-05	16	5.87943e-05	15	1.84319e-05	9	2.97221e-05	13	2.44052e-05	10	1.30319e-06	1	1.90914e-05	8	2.95517e-06	3	2.67039e-05	17	3.12484e-05	11			2.29847e-05	12	2.89258e-05	14	2.11732e-05	10	2.12303e-05	9	3.79775e-05	15	5.20171e-06	3	2.02233e-05	10	3.52157e-05	15	2.93139e-05
enzyme_ec	1.5.1.34	oxidoreductases acting on the ch-nh group of donors with nad+ or nadp+ as acceptor 6,7-dihydropteridine reductase					1.16131e-06	1							5.4434e-06	3													1.21773e-06	1			1.32868e-06	1			4.24892e-05	18	1.79278e-06	1	0	0	3.31739e-06	2			7.08541e-06	5	7.8218e-07
enzyme_ec	1.5.1.39	oxidoreductases acting on the ch-nh group of donors with nad+ or nadp+ as acceptor fmn reductase [nad(p)h]	0.000252797	95	0.000525033	138	0.000144996	57	0.000187493	42	0.000296356	96	0.000246744	91	0.000309321	108	0.000217934	65	0.000367484	95	0.000166841	54	0.000236099	79	0.000128563	50	0.000194933	92	0.000243443	90	8.64473e-05	27	0.000303856	107	0.00234328	217	0.00022091	85	0.000266394	105	0.000259633	107	0.00017501	70	0.00021411	69	0.000251261	95	0.00019634
enzyme_ec	1.5.1.40	oxidoreductases acting on the ch-nh group of donors with nad+ or nadp+ as acceptor 8-hydroxy-5-deazaflavin:nadph oxidoreductase					2.59451e-06	1			1.94139e-06	2					1.11848e-06	1			0.000172012	14	2.36948e-06	1			7.4957e-06	4	2.97831e-06	2	5.01105e-06	1							9.73597e-07	1	6.65836e-06	2	1.04189e-05	3					1.1161e-05
enzyme_ec	1.5.1.43	oxidoreductases acting on the ch-nh group of donors with nad+ or nadp+ as acceptor carboxynorspermidine synthase	0.000407468	70	0.000423934	89	0.00037968	57	0.000287953	38	0.000375285	51	0.000352991	55	0.000596597	85	0.000248867	47	0.000358659	53	0.000296325	47	0.000290594	56	0.000367905	63	0.000384439	72	0.000589747	74	0.000521314	60	0.000332794	71	0.000395421	86	0.000299435	60	0.000374259	62	0.000320056	70	0.000363641	70	0.000416757	69	0.000399347	75	0.00033114
enzyme_ec	1.5.1.5	oxidoreductases acting on the ch-nh group of donors with nad+ or nadp+ as acceptor methylenetetrahydrofolate dehydrogenase (nadp+)	0.000960421	91	0.000791686	109	0.000506001	81	0.000450413	59	0.000733086	78	0.000607501	101	0.000519841	97	0.000651174	83	0.00104962	85	0.000559511	94	0.0006063	99	0.000510579	73	0.000640287	115	0.00061619	89	0.000663936	74	0.000703569	106	0.000705288	112	0.000487371	100	0.000440694	86	0.000570379	112	0.000486455	85	0.0011677	114	0.000675274	95	0.000364614
enzyme_ec	1.5.1.54	oxidoreductases acting on the ch-nh group of donors with nad+ or nadp+ as acceptor methylenetetrahydrofolate reductase (nadh)	0.00158245	101	0.00145909	152	0.00101545	107	0.000997648	103	0.00145494	120	0.000692267	97	0.000913113	112	0.000750686	82	0.000959495	80	0.00129248	105	0.00117285	140	0.000971432	88	0.00126007	150	0.000940901	101	0.000601311	61	0.0010421	110	0.00136769	136	0.00088932	142	0.00110432	130	0.00126721	149	0.000942837	108	0.00165593	126	0.00134178	130	0.000802825
enzyme_ec	1.5.1.7	oxidoreductases acting on the ch-nh group of donors with nad+ or nadp+ as acceptor saccharopine dehydrogenase (nad+, l-lysine-forming)	1.63997e-05	5	3.5066e-05	11	6.73936e-06	3	2.07313e-06	1	3.96182e-05	10	2.28341e-05	8	0.000114205	24	3.28951e-06	2	2.40503e-05	6	7.82734e-06	3	1.5324e-05	8	4.20646e-05	15	1.46153e-05	5	7.23227e-06	4	2.9295e-05	9	1.355e-05	8	5.70576e-05	16	1.61359e-05	10	1.04607e-05	6	1.61448e-05	6	2.00379e-05	8	3.09807e-05	11	3.80215e-05	9	2.24927e-06
enzyme_ec	1.5.3.-		0.000254489	2	0	0									4.53929e-06	1	0	0					0.000161637	2	0	0			5.88371e-05	1			5.90316e-05	1			7.24851e-05	1	0.00023296	1	0.000383563	1	0.000586839	1
enzyme_ec	1.5.3.22	oxidoreductases acting on the ch-nh group of donors with oxygen as acceptor coenzyme f420h2 oxidase					7.73235e-07	1													0.000600857	55	6.83805e-05	13			5.59507e-05	18			0.000122643	17							2.18905e-05	9	6.70313e-06	3	7.50169e-05	14					5.69559e-06
enzyme_ec	1.5.5.-		1.32483e-05	7	9.96092e-06	5	2.04416e-05	8	1.37885e-06	1	3.0947e-05	12	1.24998e-05	6	5.86321e-05	22	4.6028e-05	8	1.26604e-05	6	3.03286e-05	8	4.76637e-05	11			1.486e-05	9	2.09758e-05	7	1.45531e-06	1	1.69896e-05	10	3.8121e-06	3			8.09297e-05	12	4.02517e-05	9	6.00195e-07	1	1.72078e-05	6			0.000132232
enzyme_ec	1.5.5.2	oxidoreductases acting on the ch-nh group of donors with a quinone or similar compound as acceptor proline dehydrogenase	5.05468e-05	18	0.000126829	34			7.71446e-07	1	4.49978e-05	15	4.50732e-05	17	0.000139235	36			3.39718e-06	2	3.65735e-06	3	4.10407e-05	19	2.25109e-05	13	1.54214e-05	11	5.47237e-06	5	2.41833e-06	2	9.77372e-06	8	7.15505e-05	28	1.74031e-05	12	3.23087e-05	14	8.67687e-06	6	1.13581e-05	7	3.09175e-05	12	1.02887e-05	3
enzyme_ec	1.5.98.1	oxidoreductases acting on the ch-nh group of donors with other, known, physiological acceptors methylenetetrahydromethanopterin dehydrogenase					8.86788e-05	9					1.21615e-05	4							0.000895411	19	8.22919e-05	10			0.000112461	13			0.000207171	10									8.21316e-05	11	0.000186883	13	1.12526e-06	1			3.73849e-05
enzyme_ec	1.5.98.2	oxidoreductases acting on the ch-nh group of donors with other, known, physiological acceptors 5,10-methylenetetrahydromethanopterin reductase					0.000376436	16					7.5192e-05	14							0.0036287	28	0.00042744	19			0.000376557	21			0.00111473	22									9.73558e-05	6	0.000598495	21					0.000182385
enzyme_ec	1.5.99.-		0.000336444	67	0.000303536	70	0.000618555	82	0.000387215	69	0.000384261	86	0.000418822	81	0.000174186	53	0.000320075	72	0.00029233	61	0.000299243	55	0.000953147	108	0.000808243	113	0.000990029	109	0.000561246	95	0.000287443	47	0.000787176	96	0.000936228	124	0.000184648	56	0.000483271	98	0.000728221	105	0.00047294	83	0.00032353	76	0.00067465	106	0.000392489
enzyme_ec	1.6.1.2	Transferred to 7.1.1.1			3.86723e-06	4	6.71977e-06	5	9.50856e-06	3	3.86181e-05	12	5.14044e-05	12	4.40348e-05	14	0.000182314	19	0.000214565	29	0.000107829	22	8.23654e-05	19	8.29391e-06	4	0.000172991	28	0.000108555	26	1.79345e-05	6	8.31617e-05	24	5.45122e-05	21	3.1641e-05	17	4.11167e-05	12	6.07734e-05	18	0.000130646	33	4.69084e-05	15	1.64529e-06	4	0.00017815
enzyme_ec	1.6.3.4	oxidoreductases acting on nadh or nadph with oxygen as acceptor nadh oxidase (h2o-forming)	8.68817e-06	5	4.12663e-06	4			3.09923e-06	2	1.6026e-06	1			1.78171e-06	2	6.94934e-06	5	1.52684e-05	4	1.17187e-05	6	0.000138677	29	2.33086e-06	1	7.8711e-06	6	5.9659e-06	2	2.10554e-05	6	6.02695e-06	4	2.69966e-06	2	2.85347e-05	13	2.85129e-05	8			1.06718e-06	1	0.000110257	9	8.14644e-06	7	2.1316e-06
enzyme_ec	1.6.5.10	oxidoreductases acting on nadh or nadph with a quinone or similar compound as acceptor nadph dehydrogenase (quinone)	1.65334e-06	2	2.9613e-06	2					8.19423e-07	1																									8.76484e-07	1			1.28322e-06	1
enzyme_ec	1.6.5.11	Deleted entry	6.79524e-05	18	2.89235e-05	21	8.86536e-06	3	5.65017e-06	4	9.59468e-06	6	2.2612e-05	8	6.47503e-05	21	3.78352e-05	13	1.4762e-05	5	6.00505e-05	28	0.000113115	24	2.33143e-05	7	1.9457e-05	12	8.33586e-06	6	8.08014e-05	22	0.00027626	47	2.7044e-05	16	8.93447e-06	4	0.000112691	29	0.000149106	33	6.06388e-05	17	2.4534e-05	11	5.68412e-05	20	7.41592e-06
enzyme_ec	1.6.5.2	oxidoreductases acting on nadh or nadph with a quinone or similar compound as acceptor nad(p)h dehydrogenase (quinone)	1.59598e-05	5	2.42999e-06	2			1.31641e-05	4	5.11772e-05	14	1.29327e-05	5	2.53994e-05	10	1.9219e-05	7	8.85464e-05	11			6.31775e-06	3	4.20559e-06	2	1.23209e-05	6	6.27994e-05	11			4.8904e-07	1	2.85552e-05	13	4.02627e-05	12	3.58711e-06	4	1.01837e-06	1	2.6386e-06	1			3.16551e-07	1	2.79882e-05
enzyme_ec	1.6.5.3	Transferred to 7.1.1.2	0.000102598	35	4.34806e-05	30	3.2341e-05	16	2.22217e-05	7	1.46012e-05	11	6.16973e-05	26	0.000160217	45	5.74684e-05	22	3.82275e-05	19	8.0837e-05	40	0.000146586	37	1.78718e-05	12	7.44435e-05	31	1.48385e-05	12	0.000160753	45	0.000410403	93	7.83953e-05	42	1.36794e-05	9	0.000179465	51	0.00016915	45	0.000176836	51	6.35403e-05	24	6.94468e-05	32	1.71176e-05
enzyme_ec	1.6.5.8	Transferred to 7.2.1.1	0.000116999	27	0.000154232	33	1.87685e-06	1	9.24835e-06	5	0.000115355	29	4.9416e-05	19	0.000276924	45	1.3129e-05	5	0.000128615	23	3.94379e-05	15	8.20603e-05	16	6.75018e-05	17	5.665e-05	12	2.41918e-05	10	0.000120103	18	6.2514e-05	21	0.000200668	40	4.22732e-05	11	7.76738e-05	23	1.31496e-05	5	9.04251e-05	25	3.894e-05	10	0.000151768	30	5.26064e-06
enzyme_ec	1.6.5.9	oxidoreductases acting on nadh or nadph with a quinone or similar compound as acceptor nadh:quinone reductase (non-electrogenic)			1.14518e-05	6	9.38817e-06	4	1.26726e-06	1	2.82046e-05	7	2.0642e-05	5	3.38862e-07	1	6.38875e-07	1			1.36766e-06	2	8.67937e-07	1	8.74575e-06	6	1.54165e-06	3	1.21596e-06	1	1.40045e-06	1	3.50714e-06	3	1.2705e-06	3			3.69123e-06	3			1.10095e-06	1	7.31596e-06	6	4.18081e-07	1	2.3807e-05
enzyme_ec	1.7.1.13	oxidoreductases acting on other nitrogenous compounds as donors with nad+ or nadp+ as acceptor preq1 synthase	5.15317e-06	3	5.03058e-05	13	2.91728e-05	11	7.37702e-05	16	5.99746e-06	5	7.56745e-06	3	0	0	8.80646e-06	5	6.67532e-06	4	4.11839e-05	12	6.66055e-06	4	1.00558e-05	6	9.47919e-06	6	1.17845e-05	7	0	0	7.95402e-06	6	1.52758e-05	11	1.44391e-05	8	5.13816e-06	2	3.33002e-05	12	1.54267e-05	8	2.07714e-05	11	3.65984e-06	4	1.03926e-05
enzyme_ec	1.7.1.4	oxidoreductases acting on other nitrogenous compounds as donors with nad+ or nadp+ as acceptor nitrite reductase [nad(p)h]	3.82266e-06	3	4.12663e-06	4											0	0			2.42486e-05	5	3.13233e-06	2			2.97723e-06	3			2.10554e-05	6	4.80563e-07	1	3.01125e-07	1	7.56484e-06	3									7.10374e-06	6	1.19807e-06
enzyme_ec	1.7.2.2	oxidoreductases acting on other nitrogenous compounds as donors with a cytochrome as acceptor nitrite reductase (cytochrome; ammonia-forming)	1.24228e-05	8	2.34543e-06	2	7.104e-06	4	3.81197e-05	10	2.68855e-06	3	1.83065e-05	9	3.11859e-05	7	3.83379e-05	10	2.24932e-05	4			2.28409e-05	7	1.23885e-06	2	3.05787e-06	2	4.7093e-06	2	3.68871e-05	7	7.30001e-06	4	5.93829e-05	16	1.49448e-05	8	1.2549e-05	3	8.31909e-06	6	0.000128117	18	2.64964e-06	2	8.21717e-06	3	4.07083e-05
enzyme_ec	1.7.2.3	oxidoreductases acting on other nitrogenous compounds as donors with a cytochrome as acceptor trimethylamine-n-oxide reductase	0	0			6.92751e-06	3	3.29634e-06	3	1.18671e-06	1	2.81755e-05	11	8.67087e-06	5			2.62505e-06	2					7.09123e-05	20	1.29113e-05	9			3.32245e-05	11	1.51014e-06	1	4.22452e-06	4	3.60705e-06	5	1.08002e-05	6			9.85162e-06	8	2.9547e-06	3	2.93012e-06	2	4.14244e-05
enzyme_ec	1.7.5.1	oxidoreductases acting on other nitrogenous compounds as donors with a quinone or similar compound as acceptor nitrate reductase (quinone)			8.25026e-07	1													4.49121e-06	1																													6.56719e-06
enzyme_ec	1.7.7.1	oxidoreductases acting on other nitrogenous compounds as donors with an iron-sulfur protein as acceptor ferredoxinâ€”nitrite reductase	3.55805e-06	2			3.06712e-06	2	1.13801e-06	1	4.5522e-06	3	6.20134e-06	4	2.05523e-06	2	4.53495e-06	4	2.54312e-06	2	1.5228e-06	1	4.06537e-07	1	1.03874e-06	1			1.17084e-06	1	1.76361e-06	1	2.19853e-06	2	5.34952e-07	1	4.10378e-06	3	5.76398e-06	2							2.71266e-06	2	4.43875e-06
enzyme_ec	1.7.99.-				8.25026e-07	1													4.49121e-06	1																													6.56719e-06
enzyme_ec	1.7.99.1	oxidoreductases acting on other nitrogenous compounds as donors with unknown physiological acceptors hydroxylamine reductase	2.0711e-05	11	4.06467e-06	4	6.40015e-05	17			1.26273e-06	2	4.13786e-06	3	1.96441e-06	3	2.14064e-05	7	4.5353e-06	4	0.000372461	28	8.40361e-05	23	1.67328e-06	2	1.68259e-05	9	6.05599e-06	2	3.58949e-05	10	3.89213e-05	24	6.15853e-05	41	4.85193e-05	20	3.47907e-05	10	1.13842e-05	4	2.44639e-05	12	0.000104583	30	1.05716e-05	6	4.76616e-05
enzyme_ec	1.8.1.-		4.70695e-07	1	1.97755e-05	11					5.09889e-05	18	2.21683e-05	13	7.40909e-05	26	2.75804e-05	13	1.20338e-05	7	1.07919e-05	4	2.48457e-06	3	4.85842e-05	13	8.8593e-06	9	0.000138484	20	1.49752e-06	1	3.9526e-06	3	3.47937e-05	13	4.0931e-05	22	2.83311e-05	14	1.53321e-05	1	4.01169e-06	2	4.04835e-05	7	1.81508e-05	11
enzyme_ec	1.8.1.19	oxidoreductases acting on a sulfur group of donors with nad+ or nadp+ as acceptor sulfide dehydrogenase	0.0010973	176	0.0010272	199	0.000652859	133	0.000765185	103	0.000987088	136	0.000656743	138	0.000837993	152	0.000786753	137	0.000677425	110	0.000482115	104	0.000638322	153	0.00066593	128	0.000900187	191	0.00081349	147	0.000993732	108	0.00113112	187	0.000832386	187	0.000754467	176	0.000666069	146	0.00121745	228	0.000886897	176	0.000815423	168	0.000954945	182	0.000690176
enzyme_ec	1.8.1.2	oxidoreductases acting on a sulfur group of donors with nad+ or nadp+ as acceptor assimilatory sulfite reductase (nadph)							6.58997e-06	3					3.07163e-05	8	1.01892e-05	6			1.99741e-06	1					2.3458e-05	11	4.2339e-06	2	6.62054e-05	19	4.04285e-06	2					1.1574e-05	4	0	0					7.93047e-06	3
enzyme_ec	1.8.1.20	oxidoreductases acting on a sulfur group of donors with nad+ or nadp+ as acceptor 4,4â€²-dithiodibutanoate disulfide reductase	1.40456e-05	7	2.27231e-05	11			9.8775e-06	5	9.5273e-06	4	2.28036e-05	8	4.07718e-05	18	3.48136e-06	2	1.24312e-05	5	8.1018e-06	4	1.19785e-05	7	1.14146e-05	7	3.15894e-05	14	1.62254e-06	1	6.34291e-07	1	1.03664e-05	7	3.71875e-05	16	6.33371e-06	5	1.68818e-05	10	8.25834e-06	6	9.04626e-06	4	8.37988e-06	6	2.11754e-05	11
enzyme_ec	1.8.1.22	oxidoreductases acting on a sulfur group of donors with nad+ or nadp+ as acceptor dissimilatory sulfite reductase system
enzyme_ec	1.8.1.4	oxidoreductases acting on a sulfur group of donors with nad+ or nadp+ as acceptor dihydrolipoyl dehydrogenase	0.000203709	43	0.000124043	38	0.000200409	38	0.000142681	28	8.63765e-05	32	0.000117023	33	0.000223714	54	6.96008e-05	27	0.00017704	36	0.000403962	84	0.000655393	65	8.9934e-05	24	0.000144704	55	7.45538e-05	21	0.000101514	28	0.000100227	36	0.00011126	42	0.000173557	62	0.000391865	59	0.00017832	43	0.000142189	39	0.000964608	66	0.000146817	44	0.000127068
enzyme_ec	1.8.1.7	oxidoreductases acting on a sulfur group of donors with nad+ or nadp+ as acceptor glutathione-disulfide reductase	9.72741e-06	4	4.36271e-05	10	7.54012e-05	10	0.000127196	12	3.9142e-05	15	4.60003e-05	9	3.37536e-05	11	8.7355e-06	4	8.09054e-06	4	0.000105447	13	4.58125e-05	11	2.30548e-05	7			2.19958e-05	10	0	0	2.85993e-05	10	2.88828e-05	11	1.0178e-05	5	8.30327e-05	12	3.33198e-05	9	3.80912e-05	9	8.11787e-05	11	2.76536e-05	10	3.2305e-05
enzyme_ec	1.8.1.9	oxidoreductases acting on a sulfur group of donors with nad+ or nadp+ as acceptor thioredoxin-disulfide reductase (nadph)	0.000269061	61	0.000252974	77	0.000105597	30	0.000105316	28	0.000275399	68	0.00017706	47	0.00027379	79	0.000144535	50	0.000168027	56	0.000135185	35	0.000129675	39	0.000198146	45	0.000144057	43	0.000175388	45	0.00024918	41	0.000258278	67	0.000197832	67	0.000216699	55	0.000124241	43	0.000185091	59	0.000147329	44	0.000234122	60	0.000269321	60	0.000282135
enzyme_ec	1.8.2.1	oxidoreductases acting on a sulfur group of donors with a cytochrome as acceptor sulfite dehydrogenase (cytochrome)	9.83081e-06	5	1.03576e-06	2									1.95375e-06	2	2.8698e-06	2	3.04105e-06	2											6.80307e-06	4							1.748e-06	2
enzyme_ec	1.8.3.2	oxidoreductases acting on a sulfur group of donors with oxygen as acceptor thiol oxidase	1.82326e-05	5	4.25333e-05	12	0.000114889	13	1.63442e-05	2	1.27738e-05	4	8.39001e-06	2	8.39527e-05	11	2.64306e-05	5	3.11737e-06	1	0.000106788	12	3.7113e-05	8	3.95567e-05	7	1.71448e-05	4	1.92163e-05	4	2.30673e-05	4	0.000108373	14	3.0298e-05	9	2.76296e-06	2	3.60842e-05	9	1.1589e-05	5	1.13972e-05	2	0.000116318	12	4.45808e-05	8	3.85514e-05
enzyme_ec	1.8.3.4	oxidoreductases acting on a sulfur group of donors with oxygen as acceptor methanethiol oxidase	0.000448691	21	0.000410592	25	0.000129657	17	0.000837143	27	0.000504501	24	0.000323439	23	0.000577212	28	7.2974e-05	13	0.0001305	15	0.00111047	27	0.00064194	26	0.000497808	25	3.96965e-05	15	0.000549168	25	9.919e-05	12	0.000399691	23	0.000416888	25	0.000513055	27	0.000530711	24	0.000451404	28	0.000587806	26	0.00069846	28	0.000560152	27	0.000151632
enzyme_ec	1.8.3.5	oxidoreductases acting on a sulfur group of donors with oxygen as acceptor prenylcysteine oxidase	1.9945e-06	1	1.22429e-06	1	5.80686e-06	2	1.66938e-06	1					2.28209e-06	2	4.079e-06	1			5.62489e-06	3	2.3407e-06	2					2.40183e-06	2	4.93991e-06	2	3.70544e-06	3					3.70326e-06	2					1.97141e-06	1	1.23117e-06	1	7.60724e-06
enzyme_ec	1.8.3.6	oxidoreductases acting on a sulfur group of donors with oxygen as acceptor farnesylcysteine lyase	1.9945e-06	1	1.22429e-06	1	5.80686e-06	2	1.66938e-06	1					2.28209e-06	2	4.079e-06	1			5.62489e-06	3	2.3407e-06	2					2.40183e-06	2	4.93991e-06	2	3.70544e-06	3					3.70326e-06	2					1.97141e-06	1	1.23117e-06	1	7.60724e-06
enzyme_ec	1.8.4.10	oxidoreductases acting on a sulfur group of donors with a disulfide as acceptor adenylyl-sulfate reductase (thioredoxin)					1.82692e-06	2			9.48242e-07	1	5.28981e-07	1			4.58123e-06	4					2.68923e-06	1																			1.06124e-06	1	5.45621e-06	1	5.04418e-06	1	1.69017e-06
enzyme_ec	1.8.4.11	oxidoreductases acting on a sulfur group of donors with a disulfide as acceptor peptide-methionine (s)-s-oxide reductase	1.00541e-05	4	9.36355e-06	4	2.10605e-06	2			1.49554e-05	7	8.288e-06	5	1.55596e-05	8	1.76016e-06	2	1.76802e-05	7	9.35286e-07	1	1.98933e-06	1	1.19687e-06	1	3.77548e-06	3	9.36387e-06	4	1.9284e-05	3	2.25654e-06	3	8.65738e-06	7			1.20961e-06	2	1.10407e-05	8					7.64783e-06	7
enzyme_ec	1.8.4.12	oxidoreductases acting on a sulfur group of donors with a disulfide as acceptor peptide-methionine (r)-s-oxide reductase	8.16639e-06	3	9.36355e-06	4					1.49554e-05	7	8.288e-06	5	1.50353e-05	7	1.76016e-06	2	1.57371e-05	6			1.98933e-06	1			3.77548e-06	3	7.57562e-06	3	1.9284e-05	3	2.25654e-06	3	7.84986e-06	6			7.35765e-07	1	1.08161e-05	7					7.64783e-06	7
enzyme_ec	1.8.4.14	oxidoreductases acting on a sulfur group of donors with a disulfide as acceptor l-methionine (r)-s-oxide reductase	1.06845e-06	1	3.71944e-06	2					4.00026e-06	2			6.33478e-06	2			1.44728e-06	1	1.34279e-06	1					8.31578e-07	1	1.63473e-06	1			1.45898e-06	2	2.76468e-06	1	9.23775e-07	1					8.17634e-07	1	0	0			1.58835e-06
enzyme_ec	1.8.4.8	oxidoreductases acting on a sulfur group of donors with a disulfide as acceptor phosphoadenylyl-sulfate reductase (thioredoxin)					1.82692e-06	2			9.48242e-07	1	5.28981e-07	1			4.58123e-06	4					2.68923e-06	1																			1.06124e-06	1	5.45621e-06	1	5.04418e-06	1	1.69017e-06
enzyme_ec	1.8.5.3	oxidoreductases acting on a sulfur group of donors with a quinone or similar compound as acceptor respiratory dimethylsulfoxide reductase	9.55379e-05	32	5.79583e-06	5	1.13212e-05	5	8.81884e-07	1	7.00005e-05	24	2.81755e-05	11	0.000114741	25	0.000154958	15	1.49771e-05	7	1.94827e-05	4	0.000185495	32	7.09123e-05	20	1.27054e-05	9			1.73301e-05	7	2.09624e-05	2	1.35855e-05	15			9.56899e-06	7	6.68822e-06	6	1.07397e-06	2	0.000161148	18	2.13305e-06	3	1.8176e-05
enzyme_ec	1.8.5.5	oxidoreductases acting on a sulfur group of donors with a quinone or similar compound as acceptor thiosulfate reductase (quinone)	0.000193394	32	0.000131448	27	0.000537925	65	0.000456298	35	0.000168999	25	0.000473939	39	0.000160871	28	2.93175e-06	4	0.000164661	22	0.000873824	46	7.90739e-05	25	5.05491e-05	17	0.000144251	24	0.000257679	35	0.000985775	78	3.00986e-05	16	0.000372737	53	0.000372499	30	0.00107346	75	0.000710115	49	0.000428816	35	0.000355025	15	0.000143207	35	0.000429242
enzyme_ec	1.8.5.8	oxidoreductases acting on a sulfur group of donors with a quinone or similar compound as acceptor eukaryotic sulfide quinone oxidoreductase	7.75101e-06	4	3.25232e-05	11	6.49726e-05	14	1.60954e-05	5	9.56465e-06	5	2.76328e-05	7	3.90552e-06	3	4.10941e-05	9	6.16034e-06	3	5.37134e-05	11	7.18089e-05	15	5.13955e-05	13	4.38782e-05	14	6.28061e-06	3	3.52715e-05	7	6.57365e-05	17	6.33138e-06	4	3.88413e-06	3	5.254e-05	10	3.30997e-05	12	4.61673e-05	11	7.55853e-05	12	3.48798e-05	13	3.26133e-05
enzyme_ec	1.8.7.3	oxidoreductases acting on a sulfur group of donors with an iron-sulfur protein as acceptor ferredoxin:cob-com heterodisulfide reductase	0.000708063	99	0.000574176	127	0.000331896	87	0.000384288	64	0.00066405	89	0.000462041	92	0.000369323	86	0.000356753	73	0.000930376	117	0.00368023	188	0.000582107	97	0.000378942	77	0.00117615	217	0.000234734	55	0.0010764	104	0.000463688	111	0.000609929	122	0.000414907	110	0.00045828	96	0.000707479	161	0.000773573	135	0.000227934	72	0.000701019	135	0.00030083
enzyme_ec	1.8.98.1	oxidoreductases acting on a sulfur group of donors with other, known, physiological acceptors dihydromethanophenazine:cob-com heterodisulfide reductase	0.000199022	21	0.000157742	23	0.000187549	19	0.000260928	25	0.000209657	21	0.000176003	25	0.000238612	27	0.00017199	16	0.000155745	20	0.00067295	30	0.000148241	21	7.09569e-06	4	8.40935e-05	21	7.54248e-05	13	7.24558e-05	9	3.11918e-05	6	4.38329e-05	15	0.000112139	22	0.000318826	27	0.000212454	26	3.1026e-05	7	0.000188279	22	7.03391e-05	18	0.000149311
enzyme_ec	1.8.98.4	oxidoreductases acting on a sulfur group of donors with other, known, physiological acceptors coenzyme f420:cob-com heterodisulfide,ferredoxin reductase	0.000708063	99	0.000574176	127	0.000331896	87	0.000384288	64	0.00066405	89	0.000462041	92	0.000369323	86	0.000356753	73	0.000930376	117	0.00367042	183	0.000582107	97	0.000378942	77	0.00117615	217	0.000234734	55	0.0010764	104	0.000463688	111	0.000609929	122	0.000414907	110	0.000456631	95	0.000707479	161	0.000773573	135	0.000227934	72	0.000701019	135	0.000292369
enzyme_ec	1.8.98.5	oxidoreductases acting on a sulfur group of donors with other, known, physiological acceptors h2:cob-com heterodisulfide,ferredoxin reductase	0.000806239	109	0.000688677	145	0.00052929	121	0.000417377	70	0.000787376	102	0.000532543	104	0.000434171	98	0.000408503	83	0.00108666	131	0.00707451	278	0.000998225	143	0.000442115	88	0.00177874	305	0.000283124	63	0.00204539	160	0.000530353	125	0.00072158	139	0.000492294	126	0.000615737	131	0.00101386	207	0.00113917	182	0.000288628	91	0.000820763	154	0.000390796
enzyme_ec	1.8.98.6	oxidoreductases acting on a sulfur group of donors with other, known, physiological acceptors formate:cob-com heterodisulfide,ferredoxin reductase	0.000990476	125	0.00074193	164	0.000493878	127	0.000433871	74	0.000827931	110	0.000651811	122	0.000451485	104	0.000435956	90	0.00121778	148	0.00830813	322	0.000901458	164	0.000528645	104	0.00191407	329	0.000311758	71	0.00206135	181	0.000578389	146	0.000815455	162	0.000595629	149	0.000527631	114	0.00110804	239	0.00131624	215	0.000289809	87	0.000910209	175	0.000421752
enzyme_ec	1.8.99.5	Transferred to 1.8.1.22	9.933e-05	18	9.92665e-05	25	9.23238e-05	22	0.000319734	38	4.87524e-05	14	0.000104651	17	5.28808e-05	13	4.23133e-06	2	8.30149e-05	18	0.000158306	24	0.000175677	27	1.0823e-06	1	0.000115479	35	4.81655e-05	15	0.000288628	29	0.000316054	40	0.00010175	30	3.69382e-05	15	7.27252e-05	20	3.91561e-05	14	7.55233e-05	19	3.67306e-05	14	0.000140082	29	0.000117749
enzyme_ec	1.9.6.1	oxidoreductases acting on a heme group of donors with a nitrogenous group as acceptor nitrate reductase (cytochrome)	4.45762e-06	4	2.52784e-06	4	4.80347e-07	1	4.95288e-06	3	5.77356e-06	4	6.80825e-06	5	6.91722e-06	5	3.79552e-05	13	4.50374e-05	15	9.93808e-06	4	2.39321e-06	2	2.03366e-06	2			2.61061e-06	2	9.30661e-06	4	1.63248e-06	2	6.71481e-06	7	1.20011e-05	9	3.41801e-05	12			2.45102e-05	8			2.19196e-06	3	9.47674e-06
enzyme_ec	1.97.1.-		3.78723e-05	11			2.49609e-05	10	4.64616e-05	6	8.74811e-06	3	3.05774e-05	8			1.45486e-06	2	0.000133212	13	6.99533e-05	2	1.21044e-05	6			1.10946e-05	6	1.75838e-05	5			1.83529e-05	5	2.06118e-05	9	1.60627e-05	7	6.06847e-05	11	1.73478e-05	6	9.60607e-06	5	1.09417e-05	2	1.15776e-06	1	1.33933e-05
enzyme_ec	1.97.1.4	oxidoreductases other oxidoreductases sole sub-subclass for oxidoreductases that do not belong in the other subclasses [formate-c-acetyltransferase]-activating enzyme	4.26968e-05	20	8.09927e-05	42	7.54021e-05	30	2.0274e-05	10	8.19656e-05	34	8.50652e-05	34	4.25587e-05	26	4.15535e-05	22	8.79443e-05	28	1.38066e-06	1	6.54916e-05	32	6.20516e-05	21	0.000117933	46	6.34107e-05	35	1.27309e-05	6	9.12979e-05	44	7.9013e-05	44	6.67916e-05	37	6.58848e-05	27	6.18318e-05	31	4.46882e-05	25	7.67509e-05	17	7.83756e-05	34	5.74346e-05
enzyme_ec	1.97.1.9	oxidoreductases other oxidoreductases sole sub-subclass for oxidoreductases that do not belong in the other subclasses selenate reductase (cytochrome c)	0.000776766	103	0.000300367	88	0.000253323	44	0.000332646	66	0.00029656	64	0.00016765	49	9.15419e-05	50	0.000241029	61	0.00019041	52	9.16187e-05	35	6.02241e-05	31	1.72262e-05	8	0.000155976	63	3.60547e-05	15	0.000283981	69	0.000352679	100	5.284e-05	31	9.44368e-05	45	0.000104048	48	0.000199327	70	0.000121178	43	0.000105931	37	0.000413392	84	0.000418743
enzyme_ec	2.-.-.-		1.07434e-05	5	6.22028e-06	6			0.00012033	2	1.2672e-05	4	2.4147e-06	3	4.30478e-06	3	1.30527e-05	5	4.22026e-06	4	4.44211e-06	1	0.00015986	8	3.43308e-06	3	9.08624e-06	8	4.83935e-05	7	0.000123986	1	6.15952e-06	7	9.37202e-06	7	4.09581e-06	3	0.00021931	4	0.0002758	1	8.97378e-06	5			6.07531e-06	6	1.75913e-05
enzyme_ec	2.1.1.-		9.34741e-05	45	0.000136266	70	8.4013e-05	36	2.26689e-05	12	0.0004511	74	8.11518e-05	36	0.000177774	67	0.000102384	44	5.91051e-05	32	2.24662e-05	14	5.19557e-05	31	9.23294e-05	35	8.89746e-05	53	9.48931e-05	49	6.67433e-05	23	0.000132718	60	9.07165e-05	52	0.000114041	54	8.00644e-05	46	0.000161572	81	0.000117571	50	0.000102959	43	9.43751e-05	48	8.02465e-05
enzyme_ec	2.1.1.104	transferases transferring one-carbon groups methyltransferases caffeoyl-coa o-methyltransferase	3.337e-06	1	3.153e-06	4	1.72045e-06	1			1.06443e-05	3			1.75112e-06	1			5.11844e-07	1			6.72069e-06	2					6.61281e-06	3			7.84947e-07	1	2.19742e-06	3	1.99492e-06	2			3.03284e-06	3	4.09989e-07	1	2.01789e-06	2	4.33592e-07	1	4.7608e-07
enzyme_ec	2.1.1.107	transferases transferring one-carbon groups methyltransferases uroporphyrinogen-iii c-methyltransferase	9.46515e-06	6	4.59748e-06	4	3.75618e-06	4	4.01383e-05	10	1.116e-05	6	1.14259e-05	6	6.44162e-06	2	6.11794e-06	4	1.65328e-06	2	2.04274e-05	6	1.66997e-06	1	1.49344e-06	1			6.89608e-06	7	1.65146e-05	9	3.76383e-06	3	8.75353e-06	6	4.6646e-06	4	7.96755e-06	2	2.58332e-06	3	3.63076e-07	1			1.50249e-05	8	1.093e-05
enzyme_ec	2.1.1.113	transferases transferring one-carbon groups methyltransferases site-specific dna-methyltransferase (cytosine-n4-specific)																							5.51275e-06	1	9.56258e-06	1							4.85651e-07	1			7.55615e-07	1					4.63227e-06	4
enzyme_ec	2.1.1.13	transferases transferring one-carbon groups methyltransferases methionine synthase	0.00103047	59	0.000793034	48	0.000507021	50	0.000526889	50	0.000791268	72	0.000410348	52	0.000490758	60	0.000450715	57	0.000696792	65	0.00038959	32	0.000691208	65	0.000500219	32	0.000642385	81	0.000488544	62	0.000381636	34	0.000793586	95	0.000914229	71	0.000527455	65	0.000754935	55	0.000629342	60	0.000567771	54	0.00121577	73	0.000733598	46	0.00048962
enzyme_ec	2.1.1.130	transferases transferring one-carbon groups methyltransferases precorrin-2 c20-methyltransferase	1.65898e-05	7	5.77258e-05	19	1.3806e-05	7	5.07119e-05	11	7.51895e-05	20	3.84365e-05	15	1.76397e-05	11	6.84784e-06	3	4.38832e-05	11	2.70021e-05	9	8.60754e-06	5	1.84249e-05	11	9.90129e-06	8	4.32346e-05	16	1.93877e-05	8	2.1022e-05	9	3.86895e-05	16	1.44828e-05	9	9.92045e-06	7	8.65264e-06	6	1.06995e-05	5	1.44352e-05	8	5.10827e-05	14	7.91094e-05
enzyme_ec	2.1.1.131	transferases transferring one-carbon groups methyltransferases precorrin-3b c17-methyltransferase	1.99264e-05	8	2.79587e-05	11	1.45741e-05	5	2.60871e-05	7	2.43032e-05	6	1.24588e-05	6	5.14487e-06	4	5.70971e-06	4	2.09093e-05	8	5.80231e-06	4	0	0	1.18631e-05	7	4.35294e-06	4	1.41246e-05	5	1.73346e-05	5	1.43795e-05	7	2.10299e-05	11	8.12372e-06	5	4.22929e-06	3	5.69776e-06	5	5.30558e-06	2	6.63967e-06	3	3.15692e-05	11	1.61158e-05
enzyme_ec	2.1.1.132	transferases transferring one-carbon groups methyltransferases precorrin-6b c5,15-methyltransferase (decarboxylating)	7.50314e-06	4	4.31826e-06	4	2.51239e-06	2	5.36423e-06	2	1.06945e-05	6	2.66228e-06	2	8.6088e-06	3	9.61153e-07	1	3.2709e-06	3					1.52008e-06	2	3.54793e-06	1					0	0	3.35188e-06	4	1.9237e-06	2	3.6928e-05	1			9.34882e-06	6	3.54104e-06	2	1.82913e-06	1	1.06366e-06
enzyme_ec	2.1.1.133	transferases transferring one-carbon groups methyltransferases precorrin-4 c11-methyltransferase	9.20458e-05	21	9.20357e-05	30	4.16628e-05	14	6.8812e-05	14	8.46557e-05	25	7.48603e-05	21	5.77833e-05	24	2.22904e-05	7	3.40636e-05	12	2.50343e-05	12	1.39755e-05	9	4.08719e-05	13	5.16293e-05	22	6.13198e-05	17	5.46372e-05	12	6.74839e-05	23	9.4376e-05	33	4.66557e-05	19	4.6764e-05	17	5.71218e-05	20	3.13844e-05	12	3.54829e-05	13	0.000101118	25	8.10886e-05
enzyme_ec	2.1.1.14	transferases transferring one-carbon groups methyltransferases 5-methyltetrahydropteroyltriglutamateâ€”homocysteine s-methyltransferase	0.000288092	63	9.64932e-05	50	0.000247083	61	0.000104557	19	0.000406163	78	0.000645559	140	0.000255412	91	0.000329942	72	0.000348241	77	0.0001272	31	9.51215e-05	36	0.000113907	26	0.000427462	109	0.000295601	77	0.000334291	45	0.000287664	82	0.0002331	85	0.000192266	61	0.000154266	47	0.000334925	62	0.000135675	49	0.000126623	41	0.000515405	93	0.000459812
enzyme_ec	2.1.1.148	transferases transferring one-carbon groups methyltransferases thymidylate synthase (fad)	2.23431e-05	10	2.7277e-05	14	2.11331e-05	9	7.58937e-06	4	2.94253e-05	13	1.55126e-05	6	3.21214e-05	17	1.98523e-05	9	2.59728e-05	7	9.25508e-06	7	8.88058e-06	4	7.14398e-06	5	1.50963e-05	12	1.13331e-05	8	1.25331e-05	3	1.82732e-05	13	1.55362e-05	10	5.59955e-05	18	2.37538e-05	13	2.51739e-05	14	1.26021e-05	7	3.15576e-05	17	2.03332e-05	13	2.48559e-05
enzyme_ec	2.1.1.151	transferases transferring one-carbon groups methyltransferases cobalt-factor ii c20-methyltransferase	1.65898e-05	7	5.77258e-05	19	1.3806e-05	7	5.07119e-05	11	7.51895e-05	20	3.84365e-05	15	1.76397e-05	11	6.84784e-06	3	4.38832e-05	11	2.70021e-05	9	8.60754e-06	5	1.84249e-05	11	9.90129e-06	8	4.32346e-05	16	1.93877e-05	8	2.1022e-05	9	3.86895e-05	16	1.44828e-05	9	9.92045e-06	7	8.65264e-06	6	1.06995e-05	5	1.44352e-05	8	5.10827e-05	14	7.91094e-05
enzyme_ec	2.1.1.156	transferases transferring one-carbon groups methyltransferases glycine/sarcosine n-methyltransferase									1.51196e-06	1			1.10535e-06	1	0.000172221	2	4.22206e-05	3											1.26811e-06	1	6.66925e-07	1	8.64737e-06	5	9.70998e-06	8					7.96064e-06	5			3.59545e-05	1
enzyme_ec	2.1.1.163	transferases transferring one-carbon groups methyltransferases demethylmenaquinone methyltransferase	5.75326e-06	3	3.42513e-06	4	1.02756e-05	6	1.71358e-06	1	0.000176025	12	2.85182e-06	3	6.21647e-07	1	5.00264e-06	3					8.93025e-07	1			1.45849e-05	10	6.33933e-06	4	1.7047e-06	1	7.94565e-06	4	0.00013591	15	4.33643e-06	4	1.67282e-05	6	1.19625e-06	2	1.63722e-05	8	2.10826e-06	2	1.01672e-06	1	1.29044e-05
enzyme_ec	2.1.1.170	transferases transferring one-carbon groups methyltransferases 16s rrna (guanine527-n7)-methyltransferase	2.58745e-05	17	1.89568e-05	19	1.62225e-05	9			3.69379e-05	21	2.95504e-05	18	4.46224e-05	23	2.51402e-05	14	3.77097e-05	15	2.52122e-06	2	1.49244e-05	8	9.66271e-06	7	2.60268e-05	18	5.02996e-05	23	2.23524e-06	2	1.52938e-05	13	2.6113e-05	21	3.24941e-05	17	1.75534e-05	11	2.05343e-05	18	8.60868e-06	7	1.82748e-05	14	1.87735e-05	13	2.99859e-05
enzyme_ec	2.1.1.171	transferases transferring one-carbon groups methyltransferases 16s rrna (guanine966-n2)-methyltransferase	1.65677e-05	9	3.38015e-05	11	7.26745e-06	3	5.55552e-06	2	4.25995e-05	14	2.23281e-05	9	2.42413e-05	14	1.93372e-05	7	1.48788e-05	5			1.43435e-05	6	8.45158e-06	5	1.68114e-05	10	2.84301e-05	10	2.46176e-05	8	3.16612e-05	16	2.53137e-05	12	2.76492e-05	13	2.01298e-05	8	2.982e-05	13	2.47624e-05	12	1.94506e-05	8	2.0802e-05	9	2.49952e-05
enzyme_ec	2.1.1.173	transferases transferring one-carbon groups methyltransferases 23s rrna (guanine2445-n2)-methyltransferase	2.39439e-05	7	4.75464e-05	21	3.39995e-05	14	9.46656e-06	5	1.47861e-06	1	4.7163e-05	11	2.94879e-05	11	4.71217e-06	3	4.935e-05	12	2.59017e-06	2	2.348e-05	10			2.43744e-05	11	3.92107e-05	12	6.7248e-06	4	1.32374e-05	6	3.86589e-05	15	1.23202e-05	7	1.51969e-05	7	3.89175e-06	4	3.1034e-05	14	6.02655e-06	5	2.15018e-05	8	5.50228e-05
enzyme_ec	2.1.1.176	transferases transferring one-carbon groups methyltransferases 16s rrna (cytosine967-c5)-methyltransferase	9.35007e-06	6	9.29495e-06	8	5.41074e-07	1	2.96729e-06	1	5.46963e-06	6	8.22603e-06	4	6.3524e-06	8	9.57129e-06	9	4.14759e-06	3	1.14729e-06	1	1.54485e-05	8	1.01364e-06	1	4.45252e-06	6	4.85768e-06	5	5.55344e-06	4	9.78267e-06	10	1.44773e-05	14	1.77762e-05	15			1.04406e-05	10	1.01039e-05	7	3.32256e-06	2	1.10331e-05	7	7.46482e-06
enzyme_ec	2.1.1.177	transferases transferring one-carbon groups methyltransferases 23s rrna (pseudouridine1915-n3)-methyltransferase			4.99252e-06	3	2.41796e-06	2			4.6616e-06	2	1.28256e-06	1	3.06675e-06	2	1.87484e-06	1	1.18711e-06	1			2.50928e-06	1	2.1085e-06	1	1.17447e-06	1	2.0132e-06	1			9.87074e-07	1	4.60942e-06	4	8.93209e-06	4	4.99507e-06	4	1.67832e-06	1	5.55543e-06	3	1.95146e-06	1	4.80446e-06	3	1.29551e-06
enzyme_ec	2.1.1.178	transferases transferring one-carbon groups methyltransferases 16s rrna (cytosine1407-c5)-methyltransferase	2.67609e-06	3	1.07889e-05	9	4.45878e-07	1	9.8709e-07	1	5.28291e-06	5	7.29486e-06	4	1.54355e-05	9	1.90539e-06	2	1.4314e-06	3	0	0	2.8547e-06	3			8.40999e-06	6	1.29611e-06	1	8.47896e-07	1	1.24294e-05	10	2.57021e-06	3	3.80486e-06	5	6.91305e-06	6	2.40157e-06	3	3.73658e-06	2	2.09302e-06	2	5.136e-06	5	2.67199e-06
enzyme_ec	2.1.1.182	transferases transferring one-carbon groups methyltransferases 16s rrna (adenine1518-n6/adenine1519-n6)-dimethyltransferase	9.85336e-06	7	2.57893e-05	13	1.32408e-05	5	9.15465e-07	1	3.12544e-05	18	2.43413e-05	11	1.22584e-05	9	1.55812e-05	11	9.80865e-06	7	1.09323e-06	1	4.38011e-06	4	1.01364e-06	1	9.6518e-06	10	1.67673e-05	13	3.88949e-05	8	1.82162e-05	11	1.29673e-05	10	1.9839e-05	14	6.93127e-06	6	1.52863e-05	9	3.26098e-06	3	5.73313e-06	5	1.6042e-05	11	4.02187e-05
enzyme_ec	2.1.1.185	transferases transferring one-carbon groups methyltransferases 23s rrna (guanosine2251-2â€²-o)-methyltransferase	0.000120816	37	0.000111371	40	7.67599e-05	23	6.1318e-05	18	0.000231037	53	0.000147283	35	0.000139458	55	0.00020002	46	0.000216208	49	4.28291e-05	13	0.000104318	29	0.000120016	37	0.000148102	48	0.000181078	45	5.39487e-05	12	0.000135084	53	0.00015293	55	0.000165447	49	8.67855e-05	34	0.000161728	43	9.52412e-05	36	0.000122173	29	0.00012599	37	9.78105e-05
enzyme_ec	2.1.1.190	transferases transferring one-carbon groups methyltransferases 23s rrna (uracil1939-c5)-methyltransferase	3.26644e-05	24	5.19002e-05	31	4.52867e-05	20	1.62125e-06	2	3.33317e-05	27	5.14977e-05	16	4.4844e-05	24	3.16206e-05	20	3.9291e-05	20	3.86398e-06	2	2.36118e-05	18	1.48641e-05	10	2.8957e-05	15	6.7352e-05	19	2.12286e-05	7	3.96827e-05	25	2.99237e-05	22	2.43851e-05	17	1.64563e-05	12	1.13921e-05	12	1.97391e-05	12	2.0393e-05	19	3.25708e-05	21	6.41388e-05
enzyme_ec	2.1.1.191	transferases transferring one-carbon groups methyltransferases 23s rrna (cytosine1962-c5)-methyltransferase	0.000109232	43	0.000138134	62	0.00010213	38	3.44283e-05	13	0.000111693	43	8.59304e-05	32	0.000118076	52	9.18475e-05	34	6.77891e-05	28	5.67022e-05	18	7.78363e-05	36	6.80236e-05	30	0.000108701	50	9.18941e-05	33	8.27415e-05	21	9.70337e-05	42	0.000133359	58	9.97745e-05	45	7.66183e-05	35	9.04522e-05	40	4.04425e-05	22	8.52664e-05	36	6.68114e-05	34	9.10356e-05
enzyme_ec	2.1.1.192	transferases transferring one-carbon groups methyltransferases 23s rrna (adenine2503-c2)-methyltransferase	1.22691e-05	8	4.26624e-05	16	3.32054e-05	10	5.09238e-06	2	1.61918e-05	10	2.41715e-05	11	2.48253e-05	12	1.90876e-05	11	6.79253e-06	6	2.84354e-05	10	1.10358e-05	10	6.49798e-06	4	3.27364e-05	14	1.26114e-05	8	1.74684e-05	9	1.29547e-05	10	1.92887e-05	16	1.54186e-05	12	1.34892e-05	9	1.63606e-05	13	1.16973e-05	9	1.65097e-05	11	1.49292e-05	11	7.33434e-05
enzyme_ec	2.1.1.193	transferases transferring one-carbon groups methyltransferases 16s rrna (uracil1498-n3)-methyltransferase	7.61967e-06	6	8.05161e-06	5	4.12972e-06	3	0.000122609	1	1.41208e-05	7	4.75643e-06	4	7.29629e-06	4	5.95972e-06	5	3.78843e-06	2			1.84215e-06	1	4.74777e-05	4	1.80829e-05	8	1.57974e-05	7			1.64773e-05	8	1.07851e-05	9	5.55746e-06	4	1.03793e-05	5	3.63714e-06	4	5.06466e-06	3	3.17083e-06	2	9.93702e-06	6	8.76401e-06
enzyme_ec	2.1.1.196	transferases transferring one-carbon groups methyltransferases cobalt-precorrin-6b (c15)-methyltransferase [decarboxylating]	8.54015e-06	5	8.51815e-06	6	7.04969e-06	4	5.36423e-06	2	1.06945e-05	6	2.66228e-06	2	8.6088e-06	3	3.02359e-06	2	3.2709e-06	3	8.13495e-06	6	2.42725e-05	5	1.52008e-06	2	4.59208e-06	2	2.79364e-06	1			2.74834e-06	2	5.81322e-06	7	8.00005e-06	4	4.24855e-05	4	2.49675e-06	1	9.34882e-06	6	4.51625e-06	3	6.34966e-06	3	6.88559e-06
enzyme_ec	2.1.1.197	transferases transferring one-carbon groups methyltransferases malonyl-[acyl-carrier protein] o-methyltransferase	1.71468e-06	1													9.0586e-07	1					1.0427e-06	1	6.84425e-06	2	3.54088e-06	2	1.54661e-06	1			2.07273e-06	3							3.07719e-06	1			7.14615e-06	2	1.11185e-06	1	2.01842e-06
enzyme_ec	2.1.1.198	transferases transferring one-carbon groups methyltransferases 16s rrna (cytidine1402-2â€²-o)-methyltransferase	1.11653e-05	5	2.68922e-05	16	4.60931e-06	4	5.54775e-06	4	1.93857e-05	8	1.67913e-05	8	2.126e-05	10	1.65643e-05	8	3.15238e-05	10	1.30354e-05	4	1.27939e-05	6	7.05949e-06	5	2.34568e-05	11	2.49254e-05	10	8.86208e-06	5	1.73031e-05	9	1.78256e-05	8	1.80869e-05	12	1.65269e-05	11	1.78165e-05	11	9.34599e-06	8	1.35415e-05	8	1.88425e-05	10	3.68373e-05
enzyme_ec	2.1.1.199	transferases transferring one-carbon groups methyltransferases 16s rrna (cytosine1402-n4)-methyltransferase	4.51413e-05	28	4.72406e-05	39	2.14969e-05	14	1.85009e-05	9	8.35267e-05	43	5.18171e-05	27	7.89597e-05	42	6.70048e-05	33	4.75067e-05	25	2.57111e-06	2	1.67023e-05	12	3.739e-05	18	4.92188e-05	33	4.56718e-05	29	4.66178e-05	14	3.63199e-05	25	5.4855e-05	48	5.42862e-05	28	3.63055e-05	24	6.1735e-05	37	5.33505e-05	27	5.30993e-05	25	4.56422e-05	32	8.37907e-05
enzyme_ec	2.1.1.201	transferases transferring one-carbon groups methyltransferases 2-methoxy-6-polyprenyl-1,4-benzoquinol methylase	5.75326e-06	3	3.42513e-06	4	1.02756e-05	6	1.71358e-06	1	0.000176025	12	2.85182e-06	3	6.21647e-07	1	5.00264e-06	3					8.93025e-07	1			1.45849e-05	10	6.33933e-06	4	1.7047e-06	1	7.94565e-06	4	0.00013591	15	4.33643e-06	4	1.67282e-05	6	1.19625e-06	2	1.63722e-05	8	2.10826e-06	2	1.01672e-06	1	1.29044e-05
enzyme_ec	2.1.1.207	transferases transferring one-carbon groups methyltransferases trna (cytidine34-2â€²-o)-methyltransferase	6.41677e-06	3	8.90309e-06	5	4.36611e-06	4	5.24195e-06	3	1.83169e-05	8	1.56778e-05	3	1.13291e-05	7	1.50558e-05	6	8.81255e-06	4	2.10975e-07	1	5.0521e-06	3	8.92462e-06	4	1.34174e-05	8	6.70384e-06	5	8.21344e-07	1	6.80002e-06	5	2.00062e-05	9	2.0833e-05	9	7.26638e-06	4	1.13528e-05	4	9.83257e-06	4	5.30865e-06	2	1.88059e-05	5	2.92474e-05
enzyme_ec	2.1.1.217	transferases transferring one-carbon groups methyltransferases trna (adenine22-n1)-methyltransferase			0	0	8.85101e-07	2			3.9486e-06	2	1.94364e-06	1					1.48104e-06	1			1.27827e-06	1	1.9069e-06	1			7.53468e-07	1	7.34495e-06	2	2.46384e-06	1			8.47666e-07	1									3.07704e-06	2	8.13721e-07
enzyme_ec	2.1.1.222	transferases transferring one-carbon groups methyltransferases 2-polyprenyl-6-hydroxyphenol methylase	6.75836e-07	1	5.25479e-07	1	2.53443e-05	10					7.51561e-07	1	4.09994e-06	2	2.14565e-06	1									1.01582e-05	8	3.65526e-06	1			4.61248e-07	1	1.30158e-06	3	2.81879e-07	1	9.84149e-07	2			2.67288e-06	2	2.1969e-06	2	3.29909e-06	3
enzyme_ec	2.1.1.223	transferases transferring one-carbon groups methyltransferases trna1val (adenine37-n6)-methyltransferase	8.46431e-07	1	0	0			1.10098e-06	1	1.16518e-06	2	7.86908e-07	1											4.66618e-07	1							1.16732e-06	1	5.2172e-06	5	6.22693e-07	1			1.09813e-06	1							4.7532e-07
enzyme_ec	2.1.1.226	transferases transferring one-carbon groups methyltransferases 23s rrna (cytidine1920-2â€²-o)-methyltransferase	2.01377e-05	7	1.24978e-05	7	5.06443e-06	4	3.9199e-06	3	4.07658e-05	14	1.86076e-05	10	2.13548e-05	10	1.76357e-05	9	2.38264e-05	9			1.17548e-05	8	9.79761e-06	6	1.52433e-05	9	1.60572e-05	7	2.41815e-05	9	1.13725e-05	9	1.5806e-05	10	1.77567e-05	11	1.5553e-05	6	2.36618e-05	12	1.60236e-05	9	2.63119e-05	10	3.32753e-05	16	1.88946e-05
enzyme_ec	2.1.1.227	transferases transferring one-carbon groups methyltransferases 16s rrna (cytidine1409-2â€²-o)-methyltransferase	2.01377e-05	7	1.24978e-05	7	5.06443e-06	4	3.9199e-06	3	4.07658e-05	14	1.86076e-05	10	2.13548e-05	10	1.76357e-05	9	2.38264e-05	9			1.17548e-05	8	9.79761e-06	6	1.52433e-05	9	1.60572e-05	7	2.41815e-05	9	1.13725e-05	9	1.5806e-05	10	1.77567e-05	11	1.5553e-05	6	2.36618e-05	12	1.60236e-05	9	2.63119e-05	10	3.32753e-05	16	1.88946e-05
enzyme_ec	2.1.1.228	transferases transferring one-carbon groups methyltransferases trna (guanine37-n1)-methyltransferase	1.87335e-06	1	5.04913e-06	3	1.19716e-05	2			3.71199e-06	4	8.23103e-06	4	2.39398e-06	1	1.63013e-06	1	5.43287e-07	1			3.1148e-07	1	2.21657e-06	1	6.10542e-06	2	3.65396e-06	1	3.18337e-06	1			5.5281e-06	5	2.11238e-06	2	1.72142e-06	1	4.66762e-06	5			8.75153e-06	2	2.65763e-06	3	1.6317e-05
enzyme_ec	2.1.1.245	transferases transferring one-carbon groups methyltransferases 5-methyltetrahydrosarcinapterinâ€”corrinoid/iron-sulfur protein co-methyltransferase	0.00183555	147	0.00251193	235	0.00135192	165	0.00175372	191	0.00247711	170	0.00133495	135	0.00148091	185	0.00242896	208	0.00222369	160	0.00114743	158	0.00210062	240	0.00155026	164	0.00167597	219	0.00129462	138	0.000927607	119	0.00169941	156	0.00239567	209	0.00115922	216	0.0011461	176	0.00146492	214	0.00125363	152	0.00320725	251	0.00233092	204	0.00123763
enzyme_ec	2.1.1.247	transferases transferring one-carbon groups methyltransferases [methyl-co(iii) methylamine-specific corrinoid protein]â€”coenzyme m methyltransferase	1.91217e-05	8	4.95965e-06	3	1.74169e-06	1	3.62676e-06	2	1.9303e-05	8	6.5649e-06	5	1.89929e-05	5	4.90278e-07	1	1.0632e-05	5	2.96798e-05	8	6.45671e-06	4					1.33945e-06	1			1.00063e-05	7	9.26985e-06	5	2.72342e-06	2	8.67391e-06	4	3.48498e-06	3	6.85522e-06	5	1.37659e-05	5	1.91743e-05	12	6.03924e-06
enzyme_ec	2.1.1.248	transferases transferring one-carbon groups methyltransferases methylamineâ€”corrinoid protein co-methyltransferase	1.1001e-06	1	2.96856e-05	13	2.77991e-05	12	8.71964e-05	18			2.06823e-05	9	8.05698e-07	1	1.58866e-06	1			3.57385e-05	9	2.94031e-05	10			2.01053e-06	2	2.22974e-05	7	2.94284e-05	9	5.09696e-06	3	4.08082e-07	1	4.06311e-06	2	3.66446e-06	2	3.27321e-06	1	5.36374e-06	4	4.29581e-05	19	1.89841e-06	2	5.11914e-05
enzyme_ec	2.1.1.256	transferases transferring one-carbon groups methyltransferases trna (guanine6-n2)-methyltransferase	3.68575e-06	3	4.88744e-06	5			8.86113e-07	1	1.26273e-05	7	8.60948e-06	6	5.19815e-06	5	1.2777e-05	5	5.68729e-06	3	3.27097e-07	1	1.11282e-05	6	1.14281e-06	1	3.29011e-06	2	1.85793e-05	12			2.77819e-06	5	8.57519e-06	6	1.84993e-05	10	6.11811e-07	1	5.4015e-06	4	2.72073e-06	3	1.05152e-05	5			1.06239e-06
enzyme_ec	2.1.1.258	transferases transferring one-carbon groups methyltransferases 5-methyltetrahydrofolateâ€”corrinoid/iron-sulfur protein co-methyltransferase	2.28307e-05	11	1.27792e-05	6	0.000102153	14	0.000584363	52			2.33651e-06	1	1.95849e-05	8	6.98738e-05	15	1.53934e-06	1	0.000158853	33	2.17648e-05	7			4.20663e-05	11	3.96036e-06	1	2.52003e-05	7	8.94405e-05	19	8.73573e-06	6	8.73484e-07	1	0.000129778	29	2.77588e-05	13	1.24652e-05	5	3.09011e-05	13	4.09226e-06	3	4.51969e-05
enzyme_ec	2.1.1.271	transferases transferring one-carbon groups methyltransferases cobalt-precorrin-4 methyltransferase	9.20458e-05	21	9.20357e-05	30	4.16628e-05	14	6.8812e-05	14	8.46557e-05	25	7.48603e-05	21	5.77833e-05	24	2.22904e-05	7	3.40636e-05	12	2.50343e-05	12	1.39755e-05	9	4.08719e-05	13	5.16293e-05	22	6.13198e-05	17	5.46372e-05	12	6.74839e-05	23	9.4376e-05	33	4.66557e-05	19	4.6764e-05	17	5.71218e-05	20	3.13844e-05	12	3.54829e-05	13	0.000101118	25	8.10886e-05
enzyme_ec	2.1.1.272	transferases transferring one-carbon groups methyltransferases cobalt-factor iii methyltransferase	2.40087e-05	10	3.18356e-05	13	1.45741e-05	5	2.60871e-05	7	3.1043e-05	10	1.95427e-05	9	2.11308e-05	11	7.13935e-06	5	2.56172e-05	10	7.20532e-06	5	1.81598e-06	1	1.18631e-05	7	5.54496e-06	5	1.41246e-05	5	1.73346e-05	5	1.43795e-05	7	2.87662e-05	16	9.30759e-06	6	1.18505e-05	7	5.69776e-06	5	6.85041e-06	3	9.31517e-06	5	3.26531e-05	12	1.61158e-05
enzyme_ec	2.1.1.289	transferases transferring one-carbon groups methyltransferases cobalt-precorrin-7 (c5)-methyltransferase	7.50314e-06	4	4.31826e-06	4	2.51239e-06	2	5.36423e-06	2	1.06945e-05	6	2.66228e-06	2	8.6088e-06	3	9.61153e-07	1	3.2709e-06	3	6.09256e-06	4			1.52008e-06	2	3.54793e-06	1	4.95028e-07	1			0	0	3.35188e-06	4	1.9237e-06	2	3.6928e-05	1			9.34882e-06	6	3.54104e-06	2	1.82913e-06	1	4.33942e-06
enzyme_ec	2.1.1.295	transferases transferring one-carbon groups methyltransferases 2-methyl-6-phytyl-1,4-hydroquinone methyltransferase																																															4.40584e-07
enzyme_ec	2.1.1.297	transferases transferring one-carbon groups methyltransferases peptide chain release factor n5-glutamine methyltransferase	1.88544e-06	1	1.20149e-05	7			3.73751e-06	2	0.000247574	3	1.18172e-05	2	1.02482e-05	2	5.7764e-06	3	6.85072e-06	2			9.6976e-06	2			3.58771e-06	4	3.83771e-06	3	0	0	3.41743e-05	2	8.60218e-05	2	7.43378e-06	4	4.4673e-06	2	7.01011e-06	5			7.46205e-06	4			9.88608e-06
enzyme_ec	2.1.1.310	transferases transferring one-carbon groups methyltransferases 25s rrna (cytosine2870-c5)-methyltransferase			1.76336e-05	1
enzyme_ec	2.1.1.33	transferases transferring one-carbon groups methyltransferases trna (guanine46-n7)-methyltransferase	1.92307e-05	10	2.54524e-05	14	1.35878e-05	4	1.85761e-06	1	2.18282e-05	13	1.05969e-05	6	2.36351e-05	16	2.23073e-05	12	3.70716e-05	13			1.19328e-05	6	1.38704e-05	8	1.31313e-05	8	1.36503e-05	10	6.93062e-06	3	9.02988e-06	8	1.73899e-05	13	1.97956e-05	12	1.03004e-05	7	1.76917e-05	14	6.20122e-06	4	6.61934e-06	5	8.7192e-06	6	2.79317e-05
enzyme_ec	2.1.1.342	transferases transferring one-carbon groups methyltransferases anaerobilin synthase																																	7.22522e-06	6
enzyme_ec	2.1.1.354	transferases transferring one-carbon groups methyltransferases [histone h3]-lysine4 n-trimethyltransferase	6.76608e-06	1							1.02607e-06	1							6.58358e-06	1					1.33852e-05	1	1.63554e-06	1			6.12814e-06	2									9.53795e-07	1					9.82398e-07	1
enzyme_ec	2.1.1.37	transferases transferring one-carbon groups methyltransferases dna (cytosine-5-)-methyltransferase	4.12589e-06	5	0.000132878	9	4.95261e-07	1			2.78002e-06	3	6.37756e-06	6	2.04841e-05	8	1.50962e-05	9	9.61255e-06	7	0	0	4.04231e-06	3	1.12146e-06	2	1.0166e-05	6	3.83633e-06	2	1.64469e-06	1			1.807e-06	3	2.59839e-06	2	8.00898e-07	2	5.71364e-05	4	8.63665e-06	3	4.47568e-06	3	3.80615e-06	1	2.29295e-06
enzyme_ec	2.1.1.379	transferases transferring one-carbon groups methyltransferases [methyl coenzyme m reductase]-l-arginine c-5-methyltransferase															1.45181e-06	2															0	0			1.43381e-06	1			1.11371e-06	1
enzyme_ec	2.1.1.41	transferases transferring one-carbon groups methyltransferases sterol 24-c-methyltransferase																					2.92736e-06	1							6.37768e-06	1	1.20134e-06	1
enzyme_ec	2.1.1.45	transferases transferring one-carbon groups methyltransferases thymidylate synthase	3.20076e-05	9	3.3174e-05	9	1.87173e-05	6	0.00011749	7	6.09795e-05	21	5.34087e-05	18	3.52213e-05	12	5.56294e-05	15	5.85289e-05	17	8.3683e-06	4	3.04637e-05	12	2.79837e-05	8	5.24704e-05	18	4.76532e-05	18	1.72994e-06	2	3.26401e-05	11	5.03804e-05	22	5.83468e-05	16	1.85726e-05	5	5.15077e-05	17	1.34552e-05	5	3.10717e-05	9	4.10918e-05	11	5.21963e-05
enzyme_ec	2.1.1.63	transferases transferring one-carbon groups methyltransferases methylated-dnaâ€”[protein]-cysteine s-methyltransferase	1.21243e-06	1							3.26028e-07	1			1.67361e-06	1							0	0			4.05461e-06	2	8.72944e-07	1			6.29194e-07	1	5.0536e-07	1	0	0
enzyme_ec	2.1.1.64	transferases transferring one-carbon groups methyltransferases 3-demethylubiquinol 3-o-methyltransferase	6.75836e-07	1	5.25479e-07	1	2.53443e-05	10					7.51561e-07	1	4.09994e-06	2	2.14565e-06	1									1.01582e-05	8	3.65526e-06	1			4.61248e-07	1	1.30158e-06	3	2.81879e-07	1	9.84149e-07	2			2.67288e-06	2	2.1969e-06	2	3.29909e-06	3
enzyme_ec	2.1.1.72	transferases transferring one-carbon groups methyltransferases site-specific dna-methyltransferase (adenine-specific)	4.12261e-05	28	0.000143122	54	1.85717e-05	10	5.88467e-05	28	5.12289e-05	33	2.05511e-05	17	6.63468e-05	43	2.7635e-05	21	6.83089e-05	22	2.22463e-05	11	4.86113e-05	35	1.95506e-05	8	0.000211592	67	3.71425e-05	28	8.21973e-05	24	7.2529e-05	57	6.07955e-05	52	1.40392e-05	17	3.0986e-05	24	7.00794e-05	44	8.67574e-05	40	3.18382e-05	24	3.65667e-05	33	4.26095e-05
enzyme_ec	2.1.1.74	transferases transferring one-carbon groups methyltransferases methylenetetrahydrofolateâ€”trna-(uracil54-c5)-methyltransferase [nad(p)h-oxidizing]	5.6874e-07	1					6.02166e-06	3	1.6116e-05	8	2.26779e-06	2	3.64931e-06	5	5.70889e-06	5	4.43575e-06	4	1.38652e-05	4	1.61305e-06	1			2.2221e-06	2	2.2076e-06	2	4.302e-06	1	1.10864e-05	7			2.78941e-06	3	2.51051e-06	2	5.21642e-07	1	2.45318e-06	2	3.83697e-06	3	8.25734e-07	2	1.20629e-05
enzyme_ec	2.1.1.79	transferases transferring one-carbon groups methyltransferases cyclopropane-fatty-acyl-phospholipid synthase	2.31885e-05	7	4.10244e-05	11	2.36886e-06	1	7.07278e-06	3	0.000218877	35	0.000100445	14	2.35788e-05	9	2.44313e-05	10	1.61884e-05	8	7.20559e-06	3	3.07041e-06	1	2.85896e-05	9	2.18453e-05	9	4.93357e-05	10	1.33036e-05	5	2.52764e-05	11	6.36327e-05	16	1.65022e-05	8	6.83168e-06	3	2.08879e-05	9	1.30567e-05	6	1.73096e-05	6	1.38303e-05	6	0.00014737
enzyme_ec	2.1.1.80	transferases transferring one-carbon groups methyltransferases protein-glutamate o-methyltransferase	2.02371e-05	9	1.16681e-05	8	3.26754e-06	3	2.07977e-06	1	8.70193e-05	16	1.42561e-05	4	2.9744e-05	9	3.14748e-05	8	1.05727e-05	4			3.61036e-05	12	9.24949e-06	4	1.79742e-05	12	3.57873e-05	8			1.82363e-05	6	6.27665e-05	22	9.83448e-05	26	6.99315e-06	3	5.44069e-05	10	1.95991e-05	5	6.42798e-05	18	2.10192e-05	7	1.1106e-05
enzyme_ec	2.1.1.86	Transferred to 7.2.1.4					6.08859e-05	15													0.000808679	30	9.77126e-05	15			5.49846e-05	12			0.00020744	16									4.67421e-05	11	0.000125446	23	3.32967e-06	2			1.35305e-05
enzyme_ec	2.1.2.1	transferases transferring one-carbon groups hydroxymethyl-, formyl- and related transferases glycine hydroxymethyltransferase	0.00149066	197	0.00146557	269	0.00147522	243	0.00127001	166	0.00125582	199	0.00170386	252	0.00193858	234	0.00146633	183	0.00117744	143	0.00146341	209	0.00169816	237	0.00143294	189	0.00194599	290	0.00155742	192	0.00109673	136	0.00187474	266	0.00163063	301	0.00165794	231	0.00181466	276	0.00159757	248	0.00155624	266	0.00147792	201	0.0016042	265	0.00118577
enzyme_ec	2.1.2.10	transferases transferring one-carbon groups hydroxymethyl-, formyl- and related transferases aminomethyltransferase	0.000297567	69	0.000239154	63	7.23177e-05	24	0.000726985	123	0.000227783	42	0.000241076	52	0.000478534	79	0.000115328	33	0.000184666	28	0.000394415	97	0.000151894	33	0.000243794	50	0.000237802	69	0.000164578	42	0.000360241	70	0.000248743	79	0.000256225	54	0.000130266	30	0.000348809	91	0.000251356	73	0.000278038	72	0.000177364	40	0.000281772	64	6.86658e-05
enzyme_ec	2.1.2.11	transferases transferring one-carbon groups hydroxymethyl-, formyl- and related transferases 3-methyl-2-oxobutanoate hydroxymethyltransferase	0.00011379	35	4.55048e-05	21	4.09332e-05	17	3.04686e-05	8	0.00014703	30	4.97353e-05	18	6.30864e-05	27	5.52975e-05	16	4.85543e-05	15	3.78327e-05	10	5.63061e-05	15	6.39849e-05	21	6.19149e-05	18	0.000106612	25	5.02586e-05	11	5.47649e-05	19	5.78306e-05	23	0.000114833	28	6.0751e-05	25	0.000169783	31	5.52729e-05	15	3.698e-05	14	3.1782e-05	16	4.3393e-05
enzyme_ec	2.1.2.2	transferases transferring one-carbon groups hydroxymethyl-, formyl- and related transferases phosphoribosylglycinamide formyltransferase 1	0.000118096	37	0.000136851	45	4.61722e-05	20	1.88222e-05	12	0.000223378	52	0.000100034	47	0.00018706	49	0.00013995	42	0.000121829	41	2.77291e-05	16	6.21888e-05	22	0.000107538	44	6.63436e-05	40	8.87191e-05	35	5.22226e-05	13	0.000116776	48	0.000147238	50	9.13335e-05	34	3.58417e-05	21	9.99316e-05	43	7.0653e-05	32	7.70191e-05	33	0.000140825	52	9.39623e-05
enzyme_ec	2.1.2.3	transferases transferring one-carbon groups hydroxymethyl-, formyl- and related transferases phosphoribosylaminoimidazolecarboxamide formyltransferase	0.00177976	255	0.00237818	342	0.00181091	266	0.00175122	244	0.00201422	315	0.00198259	297	0.00187908	304	0.00137947	224	0.00188187	244	0.00142215	239	0.00167405	293	0.00176354	293	0.00179671	322	0.00191418	309	0.00137299	197	0.00176297	328	0.00205836	368	0.00177517	317	0.00177989	312	0.00233522	387	0.00168828	285	0.00195396	291	0.0017842	336	0.00226249
enzyme_ec	2.1.2.5	transferases transferring one-carbon groups hydroxymethyl-, formyl- and related transferases glutamate formimidoyltransferase	0.000232932	50	0.000139522	44	7.56472e-05	19	0.000260982	43	0.000248368	35	0.000186703	46	0.000292278	48	5.29108e-05	15	6.3589e-05	18	0.000227903	45	0.000189695	41	0.000463555	56	0.000155986	46	0.000223469	51	0.000189888	42	0.000147576	43	0.000243183	49	0.000171533	44	0.000211756	43	8.58572e-05	28	0.000127543	34	9.06827e-05	34	0.000220163	34	0.000140167
enzyme_ec	2.1.2.9	transferases transferring one-carbon groups hydroxymethyl-, formyl- and related transferases methionyl-trna formyltransferase	8.30371e-05	35	0.000118965	65	4.67682e-05	24	4.04284e-05	16	0.00014777	68	0.000111103	52	9.36121e-05	49	9.92954e-05	49	0.000100837	52	1.03359e-05	9	3.75634e-05	26	4.94869e-05	32	9.96338e-05	47	0.000100229	52	4.45402e-05	19	9.19198e-05	57	8.43865e-05	56	0.000114236	45	3.96783e-05	26	0.000105022	55	4.20164e-05	29	8.0812e-05	38	7.95633e-05	42	7.35334e-05
enzyme_ec	2.1.3.-		4.88572e-05	8	0.000127992	27	0.000351981	26	0.00014924	26	9.84669e-05	11	7.49738e-05	19	8.2209e-05	20	4.56997e-05	9	1.35805e-05	4	0.00010863	20	7.37911e-05	18	2.07732e-05	7	0.000101267	28	2.63404e-05	13	5.307e-05	19	0.000130341	19	2.98831e-05	13	8.64943e-05	20	0.000110726	21	0.000110703	32	0.000103086	26	5.36579e-05	12	7.97952e-05	25	8.04734e-05
enzyme_ec	2.1.3.1	transferases transferring one-carbon groups carboxy- and carbamoyltransferases methylmalonyl-coa carboxytransferase							1.34908e-05	4																											9.05341e-07	1									6.25258e-05	18
enzyme_ec	2.1.3.11	transferases transferring one-carbon groups carboxy- and carbamoyltransferases n-succinylornithine carbamoyltransferase	1.27122e-05	6	2.61304e-05	6	1.77562e-06	1	1.56165e-06	1	1.29946e-05	4	1.95069e-05	7	3.24313e-05	5	1.22702e-06	1	3.0556e-06	3	3.91543e-06	2	7.07834e-06	2	2.12477e-05	7	7.77644e-06	3	0	0			1.59155e-05	6	2.27051e-05	5	9.26329e-07	1	8.11584e-06	3	1.25308e-06	1	1.99393e-06	1	9.06317e-07	1	2.24473e-05	6
enzyme_ec	2.1.3.15	transferases transferring one-carbon groups carboxy- and carbamoyltransferases acetyl-coa carboxytransferase	0.00145266	158	0.0011884	170	0.00198838	178	0.00157816	137	0.0011784	151	0.00141301	176	0.00161422	231	0.00124513	132	0.0011658	139	0.00071783	146	0.000789424	131	0.00128655	160	0.00122536	179	0.00124286	166	0.00231832	206	0.000876086	170	0.00116108	168	0.000974023	158	0.00139116	198	0.00120712	185	0.00111585	167	0.00103608	148	0.00125953	194	0.00156633
enzyme_ec	2.1.3.2	transferases transferring one-carbon groups carboxy- and carbamoyltransferases aspartate carbamoyltransferase	0.00130726	226	0.00168376	330	0.00138934	209	0.000858855	166	0.00143986	281	0.0019036	321	0.00149872	279	0.000826639	144	0.0010728	186	0.000733969	179	0.00108687	259	0.00170292	305	0.0017785	330	0.00185183	258	0.000906651	176	0.00102486	251	0.0017826	383	0.00129858	294	0.00134189	276	0.00110563	267	0.00109273	270	0.00131683	269	0.00149564	287	0.00161844
enzyme_ec	2.1.3.3	transferases transferring one-carbon groups carboxy- and carbamoyltransferases ornithine carbamoyltransferase	0.00058336	108	0.000752217	146	0.000494771	80	0.000859209	86	0.00063641	94	0.000645031	103	0.000821595	124	0.000552109	69	0.00055972	75	0.000886657	110	0.000841866	118	0.000666599	87	0.000523868	101	0.000700506	96	0.00117137	92	0.000835472	129	0.000774593	139	0.000670914	102	0.000655476	113	0.000854404	127	0.000864655	128	0.000707275	110	0.000791436	120	0.000924357
enzyme_ec	2.1.3.6	transferases transferring one-carbon groups carboxy- and carbamoyltransferases putrescine carbamoyltransferase	2.96298e-05	5	1.35871e-05	7	3.27879e-06	2					2.10059e-05	10	7.89758e-06	5	8.7212e-06	3	6.05892e-06	3					3.58835e-06	2	2.40285e-06	3	1.25696e-05	4	2.17019e-05	7	9.19953e-06	5	3.12186e-06	3	1.9732e-05	8	5.40747e-07	1	5.61374e-06	4	3.08135e-06	2	1.99875e-06	2	8.36719e-07	1	3.75764e-05
enzyme_ec	2.1.3.9	transferases transferring one-carbon groups carboxy- and carbamoyltransferases n-acetylornithine carbamoyltransferase	0.00030179	33	0.000197061	37	5.27031e-05	19	0.000379642	55	4.58557e-05	15	7.59591e-05	17	7.87486e-05	23	0.000102028	17	0.000158059	20	8.08385e-05	18	7.33753e-05	21	0.000276455	40	3.34765e-05	14	6.97201e-05	18	0.000172993	28	0.000152898	32	0.000207627	45	8.21993e-05	28	0.000260827	40	0.000109108	25	0.000150993	24	0.000104249	24	0.00015963	31	0.000346467
enzyme_ec	2.1.4.1	transferases transferring one-carbon groups amidinotransferases glycine amidinotransferase	0.000216322	12							2.67505e-05	4	1.47863e-05	2	0.000184421	12	7.46546e-06	4	5.27922e-05	6	1.75856e-05	4	0.000144732	13			8.24818e-05	6	0.000108703	8			2.77945e-05	7	0.000109934	15			0.000152273	6	4.17275e-05	5	3.53508e-05	4	7.75503e-07	1
enzyme_ec	2.10.1.1	transferases transferring molybdenum- or tungsten-containing groups molybdenumtransferases or tungstentransferases with sulfide groups as acceptors molybdopterin molybdotransferase	3.19583e-05	14	3.04101e-05	13	6.14225e-06	5	5.41208e-06	4	5.4578e-05	24	1.58994e-05	7	1.12508e-05	9	2.32494e-05	11	3.81965e-05	16	3.73588e-06	2	9.80548e-06	4	5.03722e-05	6	7.9654e-06	7	5.98719e-05	11	1.56281e-05	9	2.20863e-05	16	4.06448e-05	20	1.67558e-05	14	1.41639e-06	2	1.43056e-05	10	1.09114e-05	8	1.42556e-05	11	2.87181e-05	13	2.50445e-05
enzyme_ec	2.2.1.1	transferases transferring aldehyde or ketonic groups transketolases and transaldolases transketolase	0.00118382	182	0.00159524	208	0.00121794	157	0.000746517	120	0.00105386	198	0.00149812	210	0.00141058	200	0.0018693	148	0.00203383	182	0.000834391	178	0.00143875	215	0.00129738	202	0.00261018	253	0.00180442	231	0.000569036	125	0.00134697	233	0.00151565	273	0.0011724	218	0.00109056	186	0.00099158	180	0.00124774	239	0.00135943	206	0.00109669	234	0.00249678
enzyme_ec	2.2.1.10	transferases transferring aldehyde or ketonic groups transketolases and transaldolases 2-amino-3,7-dideoxy-d-threo-hept-6-ulosonate synthase											2.77294e-06	2	1.02431e-06	1			1.00535e-05	4	5.05792e-05	10					4.7125e-06	4			1.28908e-06	1	1.89058e-06	2	0	0					0	0			1.84744e-06	2
enzyme_ec	2.2.1.11	transferases transferring aldehyde or ketonic groups transketolases and transaldolases 6-deoxy-5-ketofructose 1-phosphate synthase	4.45956e-06	2	9.80748e-06	6	2.43841e-06	2	2.91863e-06	2	7.76492e-06	4	6.18935e-06	4	4.62441e-05	6	6.25405e-06	2	9.00007e-06	4	5.39524e-06	3	8.16772e-06	4	7.05447e-07	1	1.58946e-06	1	6.04055e-06	2	3.89085e-06	1	7.65954e-06	5	1.67242e-06	2	1.73187e-06	1	1.60728e-05	5	8.50522e-06	5	1.99645e-06	1	1.37474e-05	6	2.59098e-06	2	1.29232e-05
enzyme_ec	2.2.1.14	transferases transferring aldehyde or ketonic groups transketolases and transaldolases 6-deoxy-6-sulfo-d-fructose transaldolase	0.00080022	50	0.000584443	60	0.000444975	51	0.000387509	36	0.00144273	61	0.000653518	53	0.000532734	49	0.000969156	43	0.000684425	56	0.000388168	41	0.000313008	46	0.000884871	61	0.000658054	69	0.000583181	45	0.000552576	40	0.0009283	54	0.00106071	73	0.00073743	50	0.000698555	60	0.000823364	52	0.000515867	48	0.000914576	63	0.000601661	56	0.000349188
enzyme_ec	2.2.1.2	transferases transferring aldehyde or ketonic groups transketolases and transaldolases transaldolase	0.000299758	38	6.42202e-05	15	0.00024617	33	0.000632911	60	0.000692878	47	0.000783605	62	0.000600193	43	0.00204069	45	0.0007727	46	0.000722945	50	0.00146928	73	0.000593922	70	0.000807358	43	0.00178347	79	4.98841e-05	14	0.00134861	72	0.000881459	88	0.000173694	38	0.000558179	61	0.000469237	40	0.00051719	38	0.000680194	56	0.000226926	56	0.00128183
enzyme_ec	2.2.1.6	transferases transferring aldehyde or ketonic groups transketolases and transaldolases acetolactate synthase	0.000611818	208	0.000788517	300	0.000669427	198	0.000242539	80	0.000862349	268	0.00075839	243	0.000867571	308	0.000857866	237	0.000576545	175	0.000435583	147	0.000813255	235	0.000392151	139	0.00091974	326	0.000875025	265	0.000618556	134	0.000838869	294	0.000691829	308	0.000689931	278	0.000537506	216	0.000892774	280	0.000550838	181	0.000699592	224	0.000729157	235	0.000753242
enzyme_ec	2.2.1.7	transferases transferring aldehyde or ketonic groups transketolases and transaldolases 1-deoxy-d-xylulose-5-phosphate synthase	1.77795e-05	13	0.000131092	63	1.32166e-05	8			0.000116416	37	2.04885e-05	16	3.01666e-05	22	2.23917e-05	12	8.69409e-06	6			7.01806e-05	22	4.88293e-06	5	5.21922e-05	30	2.15072e-05	17	3.41623e-05	8	2.55302e-05	19	3.02204e-05	26	2.06637e-05	18	7.31302e-06	9	3.73113e-05	16	2.75976e-05	9	2.54237e-05	15	1.01496e-05	7	3.05265e-05
enzyme_ec	2.2.1.9	transferases transferring aldehyde or ketonic groups transketolases and transaldolases 2-succinyl-5-enolpyruvyl-6-hydroxy-3-cyclohexene-1-carboxylic-acid synthase	3.63639e-05	7	4.89581e-05	23	3.97639e-05	10	3.38137e-06	2	4.56797e-05	13	2.07949e-06	1	4.09522e-06	2	2.14416e-05	5	2.69961e-06	1	1.07267e-06	1	2.85661e-06	2			2.42177e-05	13	4.58904e-06	4			0.000556942	40	1.81626e-05	11	5.13362e-06	5	3.03556e-07	1	3.73503e-06	4	0.000190299	23	3.39459e-06	2	1.86056e-06	2	5.60433e-06
enzyme_ec	2.3.1.-		2.90325e-06	3	6.89238e-06	5	6.79821e-05	12	2.63612e-05	10	1.03305e-05	6	1.12815e-05	6	2.26348e-05	17	0.000118597	42	0.000127073	46	1.08651e-05	9	0.000108211	42	2.35076e-05	3	4.91547e-05	31	0.000158612	60			6.30675e-06	9	8.54217e-06	10	5.87808e-06	6	7.51298e-06	7	2.89922e-05	16	2.27063e-05	16	1.55198e-05	11	4.60677e-05	17	9.07799e-05
enzyme_ec	2.3.1.1	transferases acyltransferases transferring groups other than aminoacyl groups amino-acid n-acetyltransferase	0.00037123	82	0.000292124	101	0.000168117	51	0.000365444	63	0.000481482	104	0.000284966	79	0.000350116	106	0.000279764	77	0.000445637	99	0.000139214	42	0.000329573	58	0.000207166	56	0.000260492	92	0.000307774	81	0.000282292	50	0.000297579	81	0.000269872	93	0.00036069	96	0.000257995	67	0.000295707	94	0.000155295	62	0.000218455	58	0.000257196	84	0.000398634
enzyme_ec	2.3.1.101	transferases acyltransferases transferring groups other than aminoacyl groups formylmethanofuranâ€”tetrahydromethanopterin n-formyltransferase					6.78314e-06	2													0.000294446	22	1.0681e-05	3			1.06813e-05	5			2.58766e-05	4									4.59882e-06	2	3.24403e-05	4					2.31242e-06
enzyme_ec	2.3.1.117	transferases acyltransferases transferring groups other than aminoacyl groups 2,3,4,5-tetrahydropyridine-2,6-dicarboxylate n-succinyltransferase	3.18523e-06	4	1.95599e-06	2	3.12989e-06	2	3.68624e-06	2	8.09119e-06	4	9.45815e-06	3	6.72017e-06	3	5.1893e-05	9	4.89772e-05	10	2.84717e-06	1	1.24755e-05	4	2.26025e-06	1	3.37614e-05	6	2.46796e-05	6	6.1594e-06	1	1.534e-05	6	7.76784e-06	4	7.61413e-06	6	1.28638e-06	1	7.7344e-06	4	1.286e-05	6	1.58204e-06	1			6.29146e-05
enzyme_ec	2.3.1.12	transferases acyltransferases transferring groups other than aminoacyl groups dihydrolipoyllysine-residue acetyltransferase	8.98041e-06	8	1.56532e-05	12	3.59081e-05	11	0.000103105	18	3.36322e-05	14	3.98603e-05	11	1.48656e-05	8	6.2854e-05	15	1.43317e-05	6	7.31847e-05	20	8.24599e-05	22	4.63574e-07	1	4.06806e-05	14	2.37508e-05	8	3.4287e-05	18	2.04136e-05	13	2.18539e-06	1	6.44343e-05	29	2.55534e-05	14	2.45209e-05	16	1.1783e-05	9	2.58202e-05	8	2.48741e-05	12	2.8666e-05
enzyme_ec	2.3.1.129	transferases acyltransferases transferring groups other than aminoacyl groups acyl-[acyl-carrier-protein]â€”udp-n-acetylglucosamine o-acyltransferase	0.000123985	30	0.000286426	54	0.000165078	35	9.39065e-05	28	7.42585e-05	21	0.000179801	61	0.000201851	38	3.09899e-05	15	6.16171e-05	19	0.000100661	42	0.000106599	32	8.91627e-05	35	0.000197229	44	0.000231927	34	3.334e-05	13	6.53918e-05	25	0.000172326	51	7.9845e-05	37	0.000105905	34	6.5579e-05	30	0.000131206	50	0.000145644	31	0.000108947	45	0.000317605
enzyme_ec	2.3.1.136	transferases acyltransferases transferring groups other than aminoacyl groups polysialic-acid o-acetyltransferase																															1.43666e-06	2	1.38972e-06	1							5.35528e-07	1
enzyme_ec	2.3.1.15	transferases acyltransferases transferring groups other than aminoacyl groups glycerol-3-phosphate 1-o-acyltransferase	6.47908e-06	5	1.28479e-06	2	1.05189e-05	8	1.1648e-05	2	9.38917e-06	8	9.1199e-06	4	1.52442e-05	5	2.99542e-06	2	4.12065e-06	4	7.36017e-06	4	4.60491e-06	4	1.6257e-05	7	3.17491e-06	2	1.48755e-05	9	2.60823e-06	2	1.9174e-05	9	6.3573e-06	5	3.88274e-06	5	4.47311e-06	4	2.85529e-06	3	1.18819e-06	1	5.91425e-06	3	2.47068e-06	2	4.62029e-06
enzyme_ec	2.3.1.157	transferases acyltransferases transferring groups other than aminoacyl groups glucosamine-1-phosphate n-acetyltransferase	9.62647e-05	27	4.99783e-05	28	8.6713e-05	17	4.99569e-05	22	0.000112024	42	8.83249e-05	34	0.000180106	51	0.000170478	46	0.000196721	40	5.5463e-05	17	3.69725e-05	19	9.1281e-05	29	6.96933e-05	37	5.16745e-05	26	0.000125425	25	0.000108494	50	8.08272e-05	41	0.000101261	49	0.000147484	43	0.000141228	49	0.000100751	33	0.000119056	34	9.81782e-05	49	0.000151638
enzyme_ec	2.3.1.16	transferases acyltransferases transferring groups other than aminoacyl groups acetyl-coa c-acyltransferase					3.10065e-05	14	3.87342e-05	6	5.90841e-06	3	9.14065e-06	4	1.29115e-05	7	3.75643e-05	12	4.06031e-06	2	2.23839e-05	8	3.79383e-05	14	3.07286e-05	9	1.90326e-05	6	1.0375e-05	5	5.87316e-05	12	2.12205e-05	12	1.47117e-05	8			0.000118347	18	1.77202e-05	5	9.43516e-06	4	6.63162e-05	20	1.14039e-05	6	3.51645e-05
enzyme_ec	2.3.1.168	transferases acyltransferases transferring groups other than aminoacyl groups dihydrolipoyllysine-residue (2-methylpropanoyl)transferase	2.83579e-06	2	2.99571e-06	1					3.36322e-05	14	2.4609e-05	3	1.02728e-05	4	1.27553e-06	1	1.34214e-05	4	7.41286e-06	3											1.64994e-05	9			1.95142e-06	1									9.1523e-07	1	3.61827e-07
enzyme_ec	2.3.1.169	transferases acyltransferases transferring groups other than aminoacyl groups co-methylating acetyl-coa synthase	0.00255592	146	0.00219735	224	0.00180237	165	0.00170537	203	0.00222533	142	0.00150017	136	0.00142993	159	0.0014276	133	0.00123326	109	0.00196118	183	0.00254702	231	0.0022325	158	0.00266662	245	0.00151051	131	0.00183972	143	0.00212637	157	0.00299436	200	0.00124799	185	0.00136853	156	0.0014776	168	0.00158942	157	0.00202377	169	0.00310198	208	0.00161732
enzyme_ec	2.3.1.179	transferases acyltransferases transferring groups other than aminoacyl groups Î²-ketoacyl-[acyl-carrier-protein] synthase ii	0.00026957	74	0.000590935	125	0.000543889	87	0.000329228	65	0.000194572	53	0.000405461	88	0.000556481	113	0.00024971	70	0.000307918	80	0.000260089	72	0.000289722	87	0.000275863	73	0.000396442	102	0.000414991	87	0.000277535	54	0.000254256	74	0.000332794	105	0.000349223	96	0.000373777	102	0.000510561	118	0.000254574	79	0.00027914	66	0.000407263	116	0.000399678
enzyme_ec	2.3.1.18	transferases acyltransferases transferring groups other than aminoacyl groups galactoside o-acetyltransferase			1.19126e-06	2	1.86116e-06	2					1.67516e-06	2			3.28119e-06	2	7.94513e-06	2	1.27717e-06	1	3.36901e-06	2									3.17752e-06	3	4.42693e-07	1	1.44235e-05	5	8.96872e-07	1	8.56433e-07	1	1.65775e-06	2
enzyme_ec	2.3.1.180	transferases acyltransferases transferring groups other than aminoacyl groups Î²-ketoacyl-[acyl-carrier-protein] synthase iii	6.24417e-05	24	0.000159059	38	0.000215171	43	3.20883e-05	15	5.64305e-05	23	0.000100425	35	0.000165158	42	3.81402e-05	23	8.63124e-05	32	3.21634e-05	19	9.93421e-05	35	0.000165671	36	0.000121418	42	0.000136526	27	6.64723e-05	20	0.000159644	44	0.00012301	49	6.59433e-05	29	0.000126104	46	0.000128483	42	6.66187e-05	28	0.000114008	32	7.58495e-05	28	0.000147069
enzyme_ec	2.3.1.189	transferases acyltransferases transferring groups other than aminoacyl groups mycothiol synthase									8.13153e-07	1			1.06915e-06	1
enzyme_ec	2.3.1.19	transferases acyltransferases transferring groups other than aminoacyl groups phosphate butyryltransferase	0.000262635	59	0.00040357	89	0.000464213	82	0.000389597	69	0.000200632	56	0.000235464	64	0.000285065	55	0.000211692	41	0.000178462	46	0.000252308	61	0.000368573	69	0.000100475	37	0.000273427	60	0.000308205	65	0.000166435	34	0.0002779	65	0.000259552	73	0.000298721	85	0.000362512	89	0.000376754	96	0.000217877	57	0.000184105	72	0.000304742	69	0.000453273
enzyme_ec	2.3.1.191	transferases acyltransferases transferring groups other than aminoacyl groups udp-3-o-(3-hydroxyacyl)glucosamine n-acyltransferase	5.0029e-05	18	0.000136219	25	0.000195211	26	7.80211e-05	16	2.31952e-05	12	8.82015e-05	29	8.50501e-05	20	2.46194e-05	11	5.14678e-05	21	3.65784e-05	13	2.21409e-05	11	2.95025e-05	11	7.72159e-05	15	6.1567e-05	16	0.000115059	16	2.51051e-05	16	5.81741e-05	22	3.36894e-05	12	7.72192e-05	25	4.9163e-05	21	2.14291e-05	12	5.8533e-05	25	3.38154e-05	15	0.000163142
enzyme_ec	2.3.1.20	transferases acyltransferases transferring groups other than aminoacyl groups diacylglycerol o-acyltransferase									2.93975e-06	1			3.0689e-06	1			5.1467e-06	1																	1.4996e-06	1									1.83917e-06	1
enzyme_ec	2.3.1.21	transferases acyltransferases transferring groups other than aminoacyl groups carnitine o-palmitoyltransferase					4.52257e-06	3					6.17661e-06	4	9.51937e-07	2	6.85308e-06	6			3.30059e-06	2	4.32464e-06	4	0	0	3.54527e-06	3			1.10079e-05	3	1.00475e-05	6	6.58472e-06	1			3.86253e-06	3	9.11504e-07	1	4.23488e-07	1	1.08471e-05	7	6.75009e-07	1	5.41587e-06
enzyme_ec	2.3.1.222	transferases acyltransferases transferring groups other than aminoacyl groups phosphate propanoyltransferase					2.76055e-06	3													1.32159e-06	1
enzyme_ec	2.3.1.234	transferases acyltransferases transferring groups other than aminoacyl groups n6-l-threonylcarbamoyladenine synthase	9.28637e-05	33	0.0001022	42	9.03903e-05	25	1.80011e-05	6	9.66192e-05	32	7.85566e-05	23	0.000105671	37	8.70589e-05	26	5.07701e-05	19	1.34861e-05	5	4.54181e-05	16	5.96401e-05	22	8.10821e-05	29	0.000142723	43	9.06508e-05	19	7.67436e-05	32	6.37345e-05	35	7.94599e-05	29	5.02849e-05	18	8.12464e-05	32	4.50488e-05	21	7.70795e-05	23	6.75459e-05	26	0.000106389
enzyme_ec	2.3.1.245	transferases acyltransferases transferring groups other than aminoacyl groups 3-hydroxy-5-phosphooxypentane-2,4-dione thiolase	5.49998e-05	13	2.11173e-05	11	2.36518e-05	9	1.55107e-05	5	2.40364e-05	10	2.45866e-05	6	5.9316e-05	18	3.72428e-06	2	4.41635e-06	4	1.56077e-05	4	1.09189e-05	3	2.06013e-05	8	1.0671e-05	4	1.14265e-05	6	1.97659e-05	4	1.87133e-05	8	6.66704e-06	5	1.04787e-05	7	2.80798e-05	8	4.78997e-05	12	2.47494e-05	9	5.70287e-05	16	3.77483e-05	18	1.38243e-05
enzyme_ec	2.3.1.247	transferases acyltransferases transferring groups other than aminoacyl groups (5s)-5-amino-3-oxohexanoate:acetyl-coa ethylamine transferase	1.52411e-05	6	3.32958e-05	8	1.57694e-05	6	0.000158186	16	1.08421e-05	6	2.63702e-05	10	3.88304e-05	8	1.15117e-06	1	1.05329e-06	1	4.92276e-05	11	9.32937e-06	3	2.64918e-05	4	3.54457e-06	3	8.0803e-06	4	6.23384e-05	9	5.95196e-05	8	2.55488e-05	10	1.11676e-05	5	3.88852e-05	13	6.60782e-05	10	2.56511e-05	6	0	0	9.30651e-06	5	1.68046e-05
enzyme_ec	2.3.1.263	transferases acyltransferases transferring groups other than aminoacyl groups 2-amino-4-oxopentanoate thiolase	8.53124e-07	1	3.48408e-05	12	1.70109e-05	6	4.07614e-05	8			3.77967e-06	3					6.10869e-07	1	0.000176087	26	1.1421e-05	6			1.99277e-06	2			6.03255e-05	14	9.29658e-05	16					5.00285e-05	18	4.4905e-06	2	5.14508e-05	10	1.60149e-06	1	1.11626e-05	6	1.51252e-05
enzyme_ec	2.3.1.266	transferases acyltransferases transferring groups other than aminoacyl groups [ribosomal protein bs18]-alanine n-acetyltransferase	2.79305e-06	2	9.72807e-06	7	1.10558e-06	1	4.68664e-05	2	2.7831e-05	8	3.54799e-05	4	2.79066e-06	4	5.94533e-06	5	2.04142e-06	1			7.29504e-07	1			1.08638e-06	2	4.31267e-06	2			7.0847e-06	4	2.63164e-06	3	4.39766e-05	5	1.37135e-06	2	7.03507e-06	8	7.71808e-06	5	1.69425e-06	2	3.10113e-05	3	7.51818e-06
enzyme_ec	2.3.1.267	transferases acyltransferases transferring groups other than aminoacyl groups [ribosomal protein us5]-alanine n-acetyltransferase			1.98803e-05	2			8.19153e-06	3	1.89644e-06	2	1.60236e-05	2	2.93225e-06	2	2.06063e-05	7	5.92664e-05	16	2.67882e-06	3	2.44172e-05	8	4.83326e-07	1	1.81699e-05	9	5.23032e-05	12	1.02076e-06	1	1.72114e-05	12	6.81031e-06	9	3.64121e-06	3	7.52693e-06	2	3.68913e-05	7	6.7947e-06	5	7.19484e-07	1			6.6023e-05
enzyme_ec	2.3.1.272	transferases acyltransferases transferring groups other than aminoacyl groups 2-acetylphloroglucinol acetyltransferase					6.42627e-07	1													0.000189495	23	4.32113e-06	3			7.03598e-06	6			3.59926e-05	6									1.1883e-06	2	7.52562e-06	4
enzyme_ec	2.3.1.274	transferases acyltransferases transferring groups other than aminoacyl groups phosphate acyltransferase	0.00013776	54	0.000114059	62	8.51534e-05	42	4.91698e-05	20	0.000193424	66	0.000123729	49	0.000129602	58	0.000138412	51	9.5208e-05	48	2.57487e-05	12	0.000108882	42	0.000120782	42	0.000116323	49	0.000156808	57	8.70879e-05	31	0.000149433	70	0.000156296	77	0.000125872	54	9.64342e-05	49	0.000131838	61	9.01208e-05	42	0.000105379	38	0.000103911	42	6.94886e-05
enzyme_ec	2.3.1.276	transferases acyltransferases transferring groups other than aminoacyl groups galactosamine-1-phosphate n-acetyltransferase	2.08398e-05	5	2.73085e-06	3	6.00972e-05	9	2.39241e-05	10	7.36035e-06	2	3.55808e-06	2	5.02365e-05	13	1.88408e-05	7	1.35906e-05	2	5.24139e-05	14	0	0	1.92474e-05	4	8.00437e-06	5	6.12652e-06	4	5.23414e-05	10	2.7592e-05	9	5.12148e-06	4	1.61014e-05	6	5.26637e-05	13	6.54944e-05	16	2.53159e-05	7	5.67572e-05	9	3.70026e-05	18	5.65469e-06
enzyme_ec	2.3.1.28	transferases acyltransferases transferring groups other than aminoacyl groups chloramphenicol o-acetyltransferase	5.93706e-06	3	2.12448e-06	2					1.13256e-06	1	7.76104e-07	1	2.64349e-06	2							2.57191e-06	2	3.435e-06	2	3.92029e-07	1	1.03144e-06	1	2.93442e-06	1			1.5884e-06	2			9.3296e-06	3
enzyme_ec	2.3.1.280	transferases acyltransferases transferring groups other than aminoacyl groups (aminoalkyl)phosphonate n-acetyltransferase	5.89002e-06	1	1.62181e-06	1			1.14322e-05	2	4.77963e-06	1	0	0	3.93897e-06	1	2.1551e-06	1	1.64765e-05	4	4.10473e-06	1							3.19279e-06	1	5.16297e-06	1	9.21142e-06	3					1.34749e-06	1	2.25697e-06	1	0	0			5.00588e-06	1	4.89428e-06
enzyme_ec	2.3.1.286	transferases acyltransferases transferring groups other than aminoacyl groups protein acetyllysine n-acetyltransferase	9.11397e-05	22	7.54549e-05	30	2.53793e-05	10	2.7213e-05	7	0.000161987	44	4.42757e-05	15	8.85056e-05	25	0.000103275	24	7.5797e-05	26	7.33413e-06	4	6.01634e-05	25	6.41161e-05	23	8.61117e-05	34	8.28858e-05	33	6.28013e-05	13	6.59066e-05	31	0.000100573	37	9.5968e-05	31	5.00113e-05	21	0.00010408	33	4.47781e-05	18	8.22711e-05	25	6.00079e-05	22	8.98712e-05
enzyme_ec	2.3.1.29	transferases acyltransferases transferring groups other than aminoacyl groups glycine c-acetyltransferase	0.000713502	87	0.000466255	96	0.000250352	45	0.00070021	81	0.000546497	76	0.000572468	79	0.000885812	94	0.00039379	60	0.000611665	64	0.000949799	125	0.000356665	66	0.000527211	60	0.00052484	83	0.000349194	49	0.000645318	90	0.000686271	114	0.000502826	72	0.000415214	70	0.00069795	103	0.000613768	110	0.000564859	89	0.000486517	67	0.000679178	110	0.000287059
enzyme_ec	2.3.1.30	transferases acyltransferases transferring groups other than aminoacyl groups serine o-acetyltransferase	6.61e-05	28	4.86335e-05	25	9.55668e-06	4	1.05779e-05	4	3.51333e-05	17	5.1806e-05	14	2.64191e-05	10	7.80658e-05	27	1.76746e-05	7	7.09073e-06	6	2.92135e-05	12	1.31612e-05	7	4.24508e-05	19	4.75151e-05	18	1.9392e-05	8	4.43839e-05	16	6.18573e-05	28	3.25548e-05	14	2.19558e-05	10	5.07226e-05	17	1.82255e-05	9	4.26685e-05	12	3.70722e-05	15	2.24299e-05
enzyme_ec	2.3.1.31	transferases acyltransferases transferring groups other than aminoacyl groups homoserine o-acetyltransferase	3.43429e-05	16	5.3544e-05	20	2.25706e-05	11	8.96893e-06	5	6.82497e-05	24	5.48265e-05	18	4.2434e-05	18	9.94765e-06	6	1.73684e-05	10	2.16896e-05	11	1.1275e-05	8	2.78319e-05	11	4.01297e-05	13	2.41612e-05	12	5.83741e-06	3	2.3034e-05	14	7.79266e-05	29	3.38656e-05	14	1.47764e-05	9	3.24225e-05	20	2.29354e-05	11	2.73683e-05	12	6.63214e-05	16	3.13257e-05
enzyme_ec	2.3.1.35	transferases acyltransferases transferring groups other than aminoacyl groups glutamate n-acetyltransferase	0.000363471	75	0.000286964	96	0.000156112	45	0.000362329	62	0.000478748	101	0.000279872	75	0.000343322	102	0.000263767	72	0.000442529	97	0.000139214	42	0.000328357	57	0.000206564	55	0.000256076	89	0.000300287	77	0.000257114	48	0.000279231	78	0.000265871	87	0.000307504	81	0.000257995	67	0.000289153	90	0.000152341	60	0.000211488	55	0.000257196	84	0.000393259
enzyme_ec	2.3.1.39	transferases acyltransferases transferring groups other than aminoacyl groups [acyl-carrier-protein] s-malonyltransferase	0.000248332	52	0.000340419	82	0.000326944	68	0.00017961	36	0.000191844	58	0.000376526	83	0.000523526	108	0.000182391	43	0.00024358	58	0.000142643	38	0.000236911	50	0.000265242	45	0.000295463	62	0.000459185	78	9.46893e-05	22	0.00028726	72	0.000291038	83	0.000297887	70	0.000328818	72	0.000384434	82	0.000262484	66	0.000293109	56	0.000253148	59	0.000263068
enzyme_ec	2.3.1.46	transferases acyltransferases transferring groups other than aminoacyl groups homoserine o-succinyltransferase	3.43429e-05	16	5.3544e-05	20	2.25706e-05	11	8.96893e-06	5	6.82497e-05	24	5.48265e-05	18	4.2434e-05	18	9.94765e-06	6	1.73684e-05	10	2.16896e-05	11	1.1275e-05	8	2.78319e-05	11	4.01297e-05	13	2.41612e-05	12	5.83741e-06	3	2.3034e-05	14	7.79266e-05	29	3.38656e-05	14	1.47764e-05	9	3.24225e-05	20	2.29354e-05	11	2.73683e-05	12	6.63214e-05	16	3.13257e-05
enzyme_ec	2.3.1.47	transferases acyltransferases transferring groups other than aminoacyl groups 8-amino-7-oxononanoate synthase	5.26376e-05	20	0.000197878	39	0.000201123	29	1.87045e-05	10	3.87635e-05	15	9.04619e-05	20	0.000124052	28	2.78348e-05	8	5.4918e-05	17	3.08048e-05	12	5.97115e-05	20	7.24895e-05	20	0.000220725	30	7.71174e-05	20	1.71096e-05	9	5.85363e-05	21	0.000101021	27	3.21733e-05	13	7.95857e-05	21	3.47859e-05	16	3.7824e-05	17	0.000106929	23	8.17908e-05	28	0.000161654
enzyme_ec	2.3.1.51	transferases acyltransferases transferring groups other than aminoacyl groups 1-acylglycerol-3-phosphate o-acyltransferase	2.12875e-05	12	2.55321e-05	15	1.00992e-05	7	1.40995e-06	2	2.36819e-05	11	1.74434e-05	11	2.06474e-05	13	4.32978e-05	19	3.05132e-05	17	1.5265e-06	2	1.1838e-05	8	4.65741e-06	3	4.49141e-05	25	2.12525e-05	15	5.46423e-05	6	2.47408e-05	16	1.57693e-05	14	1.16218e-05	8	9.70482e-06	6	1.17086e-05	11	1.81612e-05	10	1.59311e-05	13	1.71116e-05	8	6.18374e-05
enzyme_ec	2.3.1.54	transferases acyltransferases transferring groups other than aminoacyl groups formate c-acetyltransferase	0.00656635	492	0.00616996	600	0.00743462	624	0.00531045	463	0.0064869	531	0.0096759	735	0.00610897	576	0.00531254	422	0.00548146	359	0.0032892	310	0.00733163	611	0.00878191	602	0.00883626	680	0.00781841	551	0.00660955	401	0.00826017	659	0.00861384	744	0.00760525	765	0.00782727	600	0.00625691	523	0.00741051	669	0.00674491	603	0.00702209	641	0.00569964
enzyme_ec	2.3.1.57	transferases acyltransferases transferring groups other than aminoacyl groups diamine n-acetyltransferase	7.6872e-06	4	2.29257e-05	6	1.48123e-05	6	1.36421e-06	1	1.36514e-05	7	1.03928e-06	1	4.66315e-06	4	6.14726e-06	3					5.82197e-07	1	3.61849e-06	2	1.1051e-05	7	4.30478e-07	1	1.39627e-05	4	2.39477e-05	7	7.18174e-06	7	7.35852e-05	13	4.02224e-06	3	3.429e-06	2	9.36995e-06	5	7.16313e-06	4	1.47019e-06	2	4.37361e-06
enzyme_ec	2.3.1.61	transferases acyltransferases transferring groups other than aminoacyl groups dihydrolipoyllysine-residue succinyltransferase	9.82091e-06	5	1.0156e-05	7	1.26648e-05	3	4.28355e-05	12	9.36051e-06	1	5.65422e-06	3	2.84127e-06	2	1.15154e-05	5	1.59868e-07	1	9.21757e-06	4	1.44132e-05	4	4.77042e-06	1	3.66929e-06	1	3.08227e-06	1	1.78005e-05	5	1.06865e-05	7	3.12624e-06	2	5.28358e-06	3	1.37616e-05	5	9.98317e-06	10	3.32916e-06	1	1.29265e-05	5	6.86239e-06	4	8.02107e-06
enzyme_ec	2.3.1.75	transferases acyltransferases transferring groups other than aminoacyl groups long-chain-alcohol o-fatty-acyltransferase									2.93975e-06	1			3.0689e-06	1			5.1467e-06	1																	1.4996e-06	1									1.83917e-06	1
enzyme_ec	2.3.1.79	transferases acyltransferases transferring groups other than aminoacyl groups maltose o-acetyltransferase	8.02147e-06	4	1.19396e-05	8	8.02274e-06	3	5.6112e-07	1	8.38128e-06	7	3.41492e-06	3	1.37477e-05	11	8.12266e-06	6	7.39905e-06	5	4.77592e-06	2	3.62275e-06	3	9.48786e-06	5	8.17425e-06	4	1.00108e-05	7	3.41911e-06	3	1.35156e-05	9	0.000102705	15			2.42605e-06	3	2.35681e-06	4	4.18332e-05	2	3.40389e-05	9	1.37494e-06	2	4.31741e-05
enzyme_ec	2.3.1.8	transferases acyltransferases transferring groups other than aminoacyl groups phosphate acetyltransferase	0.00421199	368	0.00337356	438	0.00216543	324	0.00222895	313	0.00431932	377	0.00377812	432	0.00313364	383	0.0040449	347	0.00452931	348	0.00207571	288	0.0030681	398	0.00324934	353	0.00339593	460	0.00356585	378	0.00243125	289	0.00379279	423	0.00412809	465	0.00369433	517	0.00365335	386	0.00317092	418	0.00310308	413	0.00345087	403	0.00378303	462	0.00252803
enzyme_ec	2.3.1.82	transferases acyltransferases transferring groups other than aminoacyl groups aminoglycoside 6â€²-n-acetyltransferase	4.17228e-06	2	3.01693e-06	2	2.3889e-06	1	8.07764e-07	1	2.24489e-06	2	1.12851e-06	1	4.94272e-06	3					3.65846e-07	1			6.57615e-07	1					4.03504e-06	3	8.40005e-06	5	5.47614e-06	5	6.20949e-07	1	9.98577e-07	2							1.01222e-05	6
enzyme_ec	2.3.1.89	transferases acyltransferases transferring groups other than aminoacyl groups tetrahydrodipicolinate n-acetyltransferase	2.23745e-05	9	1.12936e-05	4	3.68368e-05	4			6.98591e-05	16	1.54833e-05	6	2.76131e-05	8	1.92095e-05	5	1.35009e-06	1			6.39966e-06	4	1.86808e-05	6	0	0	1.43164e-05	9					1.2417e-05	5	3.08474e-05	12	7.32618e-06	1	2.52927e-06	1	2.57498e-06	2	4.45712e-05	12	1.51951e-05	7	2.90079e-05
enzyme_ec	2.3.1.9	transferases acyltransferases transferring groups other than aminoacyl groups acetyl-coa c-acetyltransferase	0.00635142	273	0.00420162	307	0.00425348	283	0.00643037	298	0.00637291	272	0.00476864	306	0.00463881	255	0.00466051	237	0.00501979	244	0.00884671	317	0.00542431	337	0.00629962	260	0.00367109	289	0.00621011	264	0.00542496	249	0.00497927	282	0.00507052	338	0.00601545	326	0.0058077	344	0.005897	313	0.0053206	324	0.00532509	265	0.00421997	318	0.00517115
enzyme_ec	2.3.2.-										6.62854e-07	1			9.71217e-07	1	5.72454e-07	1	5.90668e-06	6					5.60531e-06	2	1.50921e-06	1	1.00238e-06	1	1.10994e-06	1	1.30649e-05	9							6.7356e-07	1			1.87203e-06	1
enzyme_ec	2.3.2.13	transferases acyltransferases aminoacyltransferases protein-glutamine Î³-glutamyltransferase	8.45642e-06	5	6.90884e-06	6	5.22173e-05	23	1.5989e-05	7	6.12977e-05	26	1.02984e-05	5	4.43416e-05	21	7.01086e-05	28	2.50043e-05	12	4.39182e-05	20	4.12041e-06	2	2.98599e-05	10	3.3712e-06	5	4.55633e-05	19	2.43978e-05	11	3.77663e-05	20	1.09795e-05	9	1.77805e-05	10	3.66183e-05	14	4.01675e-05	16	2.67526e-05	11	1.9216e-05	8	6.0327e-06	6	2.53916e-05
enzyme_ec	2.3.2.16	transferases acyltransferases aminoacyltransferases lipid ii:glycine glycyltransferase									2.87233e-06	2	1.02233e-05	3	1.66564e-05	5			1.6941e-05	5	4.17209e-07	1											1.45188e-05	8	4.10943e-06	4	0	0	8.24057e-06	5			2.01949e-06	1	8.06037e-06	3
enzyme_ec	2.3.2.2	transferases acyltransferases aminoacyltransferases Î³-glutamyltransferase	1.49096e-06	2			2.46369e-05	10	5.43002e-06	2			2.82366e-06	1			4.53067e-06	3	4.96116e-06	3	2.61649e-06	1	6.42165e-06	2					1.76956e-05	4	1.07255e-06	1	5.38226e-06	2	2.77561e-06	2			3.36278e-06	2	9.06084e-07	1	7.2992e-07	1					0
enzyme_ec	2.3.2.26	transferases acyltransferases aminoacyltransferases hect-type e3 ubiquitin transferase	1.27696e-05	6									2.30473e-06	2	0	0			3.02533e-06	4			4.88127e-06	5	2.48569e-05	3					1.01381e-06	1	1.82872e-06	4	1.49929e-06	2	4.07712e-05	14					7.15348e-05	14	0	0	8.25648e-05	15
enzyme_ec	2.3.2.27	transferases acyltransferases aminoacyltransferases ring-type e3 ubiquitin transferase	1.15649e-06	1	6.95094e-06	6	4.73016e-07	1	7.05576e-06	3	2.88935e-06	2			2.51262e-05	2	2.24331e-05	9			1.10353e-06	1	7.03653e-05	13	2.82687e-06	1	1.02256e-05	3			1.20161e-06	1	1.53292e-05	11	1.56333e-05	5	7.03271e-06	1	1.52418e-05	7	3.82429e-05	2	8.82898e-06	6	1.67647e-06	2	1.63309e-05	1	2.17346e-05
enzyme_ec	2.3.2.3	transferases acyltransferases aminoacyltransferases lysyltransferase	0.000121263	40	9.74738e-05	33	4.06225e-05	14	5.14774e-05	7	0.000151067	46	0.000129879	45	0.000202968	52	6.47886e-05	20	7.53652e-05	25	1.5852e-05	12	9.11614e-05	35	5.3315e-05	22	0.000159417	60	0.000148906	43	3.37599e-05	15	0.000179041	63	0.000150475	68	4.20532e-05	23	7.99195e-05	29	6.16302e-05	22	0.000121459	56	0.000118512	25	9.15065e-05	36	0.000198338
enzyme_ec	2.3.2.33	transferases acyltransferases aminoacyltransferases rcr-type e3 ubiquitin transferase													5.22767e-06	1			1.27109e-06	3					5.60531e-06	2							1.82872e-06	4					7.61817e-07	1	2.57524e-05	1
enzyme_ec	2.3.2.5	transferases acyltransferases aminoacyltransferases glutaminyl-peptide cyclotransferase	3.72805e-06	4	9.53916e-06	7	1.34693e-05	7	1.43177e-06	1			9.97835e-07	1	5.80158e-06	5					2.26032e-06	1	1.03432e-06	1	8.45635e-07	1	4.89549e-07	1	4.3046e-07	1	9.54626e-07	1	7.07871e-07	1	6.39191e-06	7					7.58759e-07	1	1.04144e-06	1			3.17675e-06	2	5.71208e-06
enzyme_ec	2.3.3.1	transferases acyltransferases acyl groups converted into alkyl groups on transfer citrate (si)-synthase	0.000688587	155	0.000763209	225	0.000291008	87	0.000210857	45	0.000609888	136	0.000622536	155	0.000584979	173	0.000542477	128	0.000316162	78	7.7314e-05	31	0.000291208	106	0.000543792	149	0.000580431	195	0.000536351	140	0.000454367	91	0.000620359	190	0.000675069	215	0.000438501	139	0.000253934	89	0.000533167	158	0.000326552	105	0.000380021	123	0.000675478	181	0.000382425
enzyme_ec	2.3.3.10	transferases acyltransferases acyl groups converted into alkyl groups on transfer hydroxymethylglutaryl-coa synthase	1.62179e-06	1	2.00275e-06	1	1.5066e-05	5	1.14492e-05	3	2.78679e-05	9	4.05331e-05	10	3.80083e-06	2	5.46924e-05	8	1.08633e-06	1	0.000194143	25	1.11166e-05	6	4.50788e-06	3	6.62844e-06	6	3.49721e-06	2	7.90229e-05	12	2.49664e-06	2	2.83922e-05	9	1.09488e-05	5	5.86987e-06	3	2.93826e-06	4	1.1717e-05	6	3.06598e-05	6	3.1629e-05	6	2.25234e-05
enzyme_ec	2.3.3.13	transferases acyltransferases acyl groups converted into alkyl groups on transfer 2-isopropylmalate synthase	0.000415246	125	0.000584177	181	0.000417427	104	7.96217e-05	24	0.000472614	114	0.000484475	132	0.000547952	150	0.000462107	97	0.000444561	96	0.000123522	45	0.000388918	135	0.000273879	82	0.000532103	175	0.00059864	156	0.000230446	52	0.000421763	157	0.000569794	188	0.000551932	167	0.000382471	121	0.000568263	167	0.000343578	110	0.000371253	113	0.000429768	138	0.000487786
enzyme_ec	2.3.3.16	transferases acyltransferases acyl groups converted into alkyl groups on transfer citrate synthase (unknown stereospecificity)	7.94555e-07	1	9.74459e-07	1
enzyme_ec	2.3.3.21	transferases acyltransferases acyl groups converted into alkyl groups on transfer (r)-citramalate synthase	4.27577e-06	2	1.55664e-05	9	1.89517e-05	6			1.12264e-06	1	1.91683e-05	6	2.29301e-05	9	7.81814e-07	1	5.18032e-06	3	1.55975e-05	7	4.70362e-06	2	6.29393e-06	3	2.36746e-05	9	1.9855e-05	9	1.80102e-06	2	6.40985e-07	1	1.43503e-05	9	1.52333e-06	1	7.14854e-06	4	7.28585e-07	1			4.0132e-06	2	7.05135e-06	4	1.06343e-05
enzyme_ec	2.3.3.3	transferases acyltransferases acyl groups converted into alkyl groups on transfer citrate (re)-synthase	1.36858e-05	6	1.61013e-05	10	8.57115e-06	5	7.15296e-06	2	4.55978e-05	12	3.14115e-05	11	3.23183e-05	14	6.13766e-05	13	2.37917e-05	10			3.2775e-05	18	2.27473e-05	9	5.1948e-05	27	3.09593e-05	9	4.94952e-07	1	3.2752e-05	16	2.06434e-05	16	6.89297e-05	19	2.79494e-05	14	6.172e-05	19	3.14625e-05	13	6.34308e-05	16	2.30185e-05	14	1.77052e-05
enzyme_ec	2.3.3.5	transferases acyltransferases acyl groups converted into alkyl groups on transfer 2-methylcitrate synthase			1.34192e-06	2	5.08848e-06	2	8.74544e-06	2			1.10259e-06	1	6.48415e-07	1	8.82992e-07	1			3.67128e-06	2	7.81077e-06	4			3.25597e-07	1			8.39971e-06	4	1.59079e-05	5			2.11409e-06	1							2.62817e-05	5	2.27746e-06	2	3.8971e-06
enzyme_ec	2.4.1.-		3.4899e-05	19	1.77845e-05	20	2.10245e-05	8	4.60672e-05	6	4.49354e-05	25	0.000121034	24	0.000126855	61	2.89947e-05	19	6.10132e-05	25	1.80865e-05	10	1.7289e-05	11	3.38178e-05	14	4.57455e-05	32	5.68797e-05	19	7.57852e-05	27	6.05961e-05	34	2.65118e-05	23	2.5692e-05	23	3.54625e-05	19	4.98081e-05	30	1.44441e-05	12	0.000190685	32	3.50609e-05	28	7.14564e-05
enzyme_ec	2.4.1.1	transferases glycosyltransferases hexosyltransferases glycogen phosphorylase	0.00285168	475	0.00271772	555	0.00217138	431	0.000969948	169	0.00253848	463	0.00273711	516	0.00346576	533	0.00261869	375	0.00157655	291	0.000965259	236	0.00300948	541	0.00171061	369	0.00428189	666	0.00310263	484	0.00293172	308	0.00409122	613	0.00337984	714	0.00322782	607	0.0023603	480	0.00273332	533	0.00293737	540	0.00272041	473	0.00250142	555	0.00275952
enzyme_ec	2.4.1.11	transferases glycosyltransferases hexosyltransferases glycogen(starch) synthase	0.000637714	101	0.000867874	124	0.000475144	66	8.60375e-05	29	0.000472646	93	0.000763938	128	0.00141192	141	0.00026734	53	0.000536205	85	0.000321432	92	0.000590717	113	0.000667099	125	0.00103075	155	0.000798919	100	0.000254642	53	0.000373579	99	0.000923058	157	0.000319894	91	0.000966813	166	0.000363876	120	0.000551672	135	0.000464515	93	0.000705788	144	0.000430744
enzyme_ec	2.4.1.129	Transferred to 2.4.99.28	1.59477e-06	2	1.51778e-05	4	2.13707e-06	3	4.41567e-06	4	2.46392e-06	3	3.26124e-05	12	1.4067e-05	13	2.74414e-05	20	6.65012e-06	10	0	0	1.17097e-05	8	4.03673e-06	3	1.65433e-05	8	1.2602e-05	13	1.7942e-05	9	1.58134e-05	16	7.64255e-06	12	7.63148e-06	7	3.16465e-06	1	3.62649e-06	5	2.4787e-06	4	8.73471e-06	8	2.30049e-06	2	2.722e-05
enzyme_ec	2.4.1.17	transferases glycosyltransferases hexosyltransferases glucuronosyltransferase			4.24361e-06	2	1.50962e-05	4	5.17019e-06	1			7.29386e-06	2							3.29878e-06	2					7.73188e-06	2			4.95729e-06	1	2.88612e-06	1					5.29226e-06	1			6.49353e-06	1	3.37171e-05	6	2.8778e-06	1	2.83048e-06
enzyme_ec	2.4.1.18	transferases glycosyltransferases hexosyltransferases 1,4-Î±-glucan branching enzyme	0.000699842	171	0.000661568	220	0.000346514	105	0.000174108	60	0.000639495	171	0.00046448	134	0.000606304	168	0.000558459	132	0.000525344	117	0.000147605	50	0.000435991	140	0.000348536	107	0.000645996	191	0.000566772	152	0.0006387	115	0.000691415	200	0.00085497	265	0.000583093	174	0.000423136	127	0.000510513	172	0.000500165	144	0.000501795	126	0.000585914	164	0.000821171
enzyme_ec	2.4.1.187	transferases glycosyltransferases hexosyltransferases n-acetylglucosaminyldiphosphoundecaprenol n-acetyl-Î²-d-mannosaminyltransferase	9.41776e-07	1					2.17018e-06	1	1.5723e-06	2			0	0	1.1312e-06	1	7.13731e-05	1													5.07603e-07	1	9.24518e-06	5	1.00845e-06	1	3.55505e-06	2	1.97979e-06	1			1.21576e-06	1			1.08896e-05
enzyme_ec	2.4.1.20	transferases glycosyltransferases hexosyltransferases cellobiose phosphorylase	0.000672316	124	0.00110263	194	0.000849496	138	0.000344806	80	0.000263902	65	0.000756183	155	0.00116531	165	0.00126384	166	0.000253494	50	8.14411e-05	31	0.00159152	207	0.000179982	53	0.00145272	234	0.000214625	70	0.000146567	29	0.00148439	244	0.00142748	253	0.000886402	189	0.00142381	187	0.00125271	199	0.00127939	197	0.000628465	133	0.000884054	177	0.000377972
enzyme_ec	2.4.1.208	transferases glycosyltransferases hexosyltransferases diglucosyl diacylglycerol synthase (1,2-linking)	9.70869e-07	2			1.74382e-06	2			4.38945e-06	3			7.03925e-07	1	5.90095e-07	1					2.03715e-06	2					5.4324e-07	1
enzyme_ec	2.4.1.21	transferases glycosyltransferases hexosyltransferases starch synthase (glycosyl-transferring)	0.00155941	221	0.001299	278	0.00101941	208	0.000616489	121	0.00145199	206	0.00126785	251	0.00140533	220	0.00125186	179	0.00094888	144	0.000585227	124	0.00115914	221	0.000995186	172	0.00125074	230	0.00111962	179	0.00143036	154	0.00199362	283	0.00141044	307	0.0012944	240	0.00135101	193	0.00139968	228	0.00151127	256	0.00135125	220	0.00137507	254	0.0012241
enzyme_ec	2.4.1.211	transferases glycosyltransferases hexosyltransferases 1,3-Î²-galactosyl-n-acetylhexosamine phosphorylase	0.000216147	60	0.000143056	45	4.17518e-05	19	2.67939e-05	11	0.000430827	70	0.00011034	34	0.000299491	71	0.000133475	24	0.000266309	35	7.86973e-05	21	6.1541e-05	22	5.18976e-05	21	6.73904e-05	25	0.000267982	49	7.27182e-05	16	0.000307663	74	0.000104216	36	0.000264551	73	0.000145819	40	0.000130454	31	9.49292e-05	22	0.00020478	50	0.000113752	25	0.000160765
enzyme_ec	2.4.1.227	transferases glycosyltransferases hexosyltransferases undecaprenyldiphospho-muramoylpentapeptide Î²-n-acetylglucosaminyltransferase	0.000185199	54	0.000225755	76	0.000180313	48	3.39074e-05	14	0.000224436	66	0.000147294	51	0.000127064	51	0.000142612	44	0.000109311	40	3.13042e-05	12	7.228e-05	26	9.5435e-05	37	0.000139257	60	0.000191444	49	9.36966e-05	28	0.000164125	70	0.000149666	69	0.000209374	72	0.000108532	42	0.000215599	73	8.96339e-05	38	0.000183713	64	0.000108202	44	0.000268107
enzyme_ec	2.4.1.247	transferases glycosyltransferases hexosyltransferases Î²-d-galactosyl-(1â†’4)-l-rhamnose phosphorylase	8.49436e-06	6	7.5135e-06	5	2.16902e-06	2			1.35705e-05	9	2.48306e-06	3	5.56494e-06	6	6.61717e-06	3	6.32632e-05	18	4.23563e-05	11	1.61482e-05	9	2.52603e-05	12	9.0079e-05	29	3.26503e-05	15	3.91597e-06	3	2.00618e-05	16	1.37011e-05	11	1.00251e-05	6	2.34599e-05	16	8.00371e-06	6	5.48797e-06	2	9.933e-06	4	1.15694e-05	7	9.73496e-07
enzyme_ec	2.4.1.25	transferases glycosyltransferases hexosyltransferases 4-Î±-glucanotransferase	0.000559449	118	0.000604601	172	0.000539994	155	0.000177649	40	0.000495093	150	0.000442288	109	0.000564343	146	0.000684116	153	0.000337257	119	0.000121999	50	0.000443459	133	0.000323472	99	0.000965053	234	0.000568675	126	0.000355279	56	0.000388519	170	0.000526501	203	0.000914545	170	0.000394766	116	0.000677907	171	0.000428579	134	0.000651198	129	0.000479803	151	0.000598162
enzyme_ec	2.4.1.255	transferases glycosyltransferases hexosyltransferases protein o-glcnac transferase	1.16185e-05	6	4.81672e-07	1	9.74191e-07	1	2.31029e-05	8			1.82877e-05	8			8.10659e-05	12			1.65534e-05	6			2.23487e-05	11	1.13161e-05	7	0	0			8.82565e-06	4			1.14551e-06	2	7.58095e-07	1	7.28751e-05	20	0.000181673	21	5.66452e-06	4	1.2036e-05	9	1.17221e-05
enzyme_ec	2.4.1.280	transferases glycosyltransferases hexosyltransferases n,nâ€²-diacetylchitobiose phosphorylase	0.000389844	90	0.000157058	54	0.000300434	75	0.00017205	44	0.000886978	109	0.000256054	62	0.000707609	115	0.000547202	138	0.000301966	59	0.000107863	27	0.000813923	131	0.000185201	44	0.000395923	98	0.000554881	96	0.000170392	34	0.000652754	149	0.00107846	169	0.000239181	93	0.000780621	121	0.00079849	134	0.000575939	99	0.000473207	105	0.000235076	93	0.000113314
enzyme_ec	2.4.1.281	transferases glycosyltransferases hexosyltransferases 4-o-Î²-d-mannosyl-d-glucose phosphorylase	3.57077e-05	13	3.95297e-05	9	4.13634e-05	10	1.36153e-05	6	0.000209654	22	7.84426e-05	17	0.000242214	31	0.00027868	21	1.72441e-05	7	0.000171482	22	0.000129745	24	3.13155e-05	6	3.72491e-05	13	6.46691e-06	4	4.08775e-05	7	7.49045e-05	20	6.64434e-05	23	0.000139573	22	0.000141552	22	0.000224228	24	0.000140704	31	0.000101479	16	3.22387e-05	14	1.08883e-05
enzyme_ec	2.4.1.288	transferases glycosyltransferases hexosyltransferases galactofuranosylgalactofuranosylrhamnosyl-n-acetylglucosaminyl-diphospho-decaprenol Î²-1,5/1,6-galactofuranosyltransferase	3.52949e-06	2	1.263e-05	11	2.73286e-05	12			1.472e-06	2	7.03173e-06	5	1.38524e-05	10	3.70373e-05	18	1.84348e-06	2	8.19293e-06	5	3.83441e-05	11			5.03787e-06	5	3.6263e-05	14			0.000220172	51	3.82309e-05	18	8.3858e-06	7	7.57027e-06	5	3.74601e-06	3	6.08596e-05	14			1.91716e-06	2	2.13541e-06
enzyme_ec	2.4.1.289	transferases glycosyltransferases hexosyltransferases n-acetylglucosaminyl-diphospho-decaprenol l-rhamnosyltransferase	1.85035e-06	1	6.67056e-07	1			5.79656e-07	1	1.5648e-06	2	1.36353e-05	5	1.04425e-06	2	1.61524e-05	4	5.18972e-06	4	1.38632e-05	2			4.20447e-06	3	1.76842e-05	4	3.745e-06	5	2.7103e-06	2	5.98285e-07	1	2e-06	3	3.85733e-06	4	5.8484e-07	1	8.65781e-07	1	2.1882e-06	2	2.90833e-06	3	0	0	8.35926e-06
enzyme_ec	2.4.1.292	transferases glycosyltransferases hexosyltransferases galnac-Î±-(1â†’4)-galnac-Î±-(1â†’3)-dinacbac-pp-undecaprenol Î±-1,4-n-acetyl-d-galactosaminyltransferase					9.7886e-07	1			2.52941e-06	1																																	9.60047e-07	1	1.73007e-06	1	5.6027e-07
enzyme_ec	2.4.1.315	transferases glycosyltransferases hexosyltransferases diglucosyl diacylglycerol synthase (1,6-linking)	2.35294e-06	1	1.02534e-06	2			8.25084e-06	3	1.34045e-06	2			3.84456e-06	2	5.20804e-06	2	3.63622e-06	2	7.73281e-06	4	1.48524e-06	1			1.9927e-06	3	2.65337e-06	2	1.5814e-05	3	1.64988e-05	7	5.90011e-07	1	3.00968e-06	2	1.65241e-06	3	4.11294e-06	3	6.55603e-06	4	2.40995e-06	2
enzyme_ec	2.4.1.319	transferases glycosyltransferases hexosyltransferases Î²-1,4-mannooligosaccharide phosphorylase	0.000399852	62	0.00044615	80	0.000286915	45	0.000665519	61	0.000525387	57	0.000317462	53	0.000604214	65	0.000549634	49	0.000419464	39	0.000822197	77	0.000801997	98	0.000170157	38	0.000288528	62	0.000418815	39	9.76475e-05	20	0.000577636	95	0.000414128	69	0.000580842	87	0.000783965	83	0.000583103	80	0.00058279	87	0.00045141	58	0.00027062	66	0.000188402
enzyme_ec	2.4.1.320	transferases glycosyltransferases hexosyltransferases 1,4-Î²-mannosyl-n-acetylglucosamine phosphorylase	0.000399852	62	0.00044615	80	0.000286915	45	0.000665519	61	0.000525387	57	0.000317462	53	0.000604214	65	0.000549634	49	0.000419464	39	0.000822197	77	0.000801997	98	0.000170157	38	0.000288528	62	0.000418815	39	9.76475e-05	20	0.000577636	95	0.000414128	69	0.000580842	87	0.000783965	83	0.000583103	80	0.00058279	87	0.00045141	58	0.00027062	66	0.000188402
enzyme_ec	2.4.1.337	transferases glycosyltransferases hexosyltransferases 1,2-diacylglycerol 3-Î±-glucosyltransferase			3.03236e-06	3	1.1804e-05	4			1.2183e-05	8	1.96803e-06	2	4.32977e-06	4	2.89351e-06	3	1.64727e-06	1	2.56564e-05	1	4.36071e-06	2			1.91256e-06	2	2.02366e-05	11	8.18052e-07	1	2.5505e-05	10	8.26516e-06	8	1.80305e-06	3	1.22558e-05	3	2.43696e-05	17	9.74019e-06	5			1.4141e-05	7	3.60909e-06
enzyme_ec	2.4.1.342	transferases glycosyltransferases hexosyltransferases Î±-maltose-1-phosphate synthase			5.65836e-07	1	7.91817e-06	4	3.66692e-06	2	2.43972e-05	9	1.73211e-05	6	1.55055e-05	6	0.000108624	14	0.000115008	17	3.99368e-06	2	6.31361e-05	12	2.38106e-06	1	2.15415e-05	7	7.32979e-05	16	0	0	7.4925e-05	19	1.0935e-05	8	9.6978e-06	6	1.0255e-05	5	1.87969e-05	8	2.53276e-05	8	6.63981e-06	3			0.000139089
enzyme_ec	2.4.1.355	transferases glycosyltransferases hexosyltransferases poly(ribitol-phosphate) Î²-n-acetylglucosaminyltransferase	1.78451e-06	2	1.00815e-05	7					9.65505e-07	1					6.42397e-06	5	1.81378e-06	2	1.25456e-05	4	2.61659e-06	3	2.85212e-06	3	3.2758e-06	4	2.54344e-06	2			3.97024e-06	4			4.32055e-06	2			4.04661e-07	1			6.64684e-06	4	6.34362e-07	1	5.48685e-07
enzyme_ec	2.4.1.377	transferases glycosyltransferases hexosyltransferases dtdp-rha:Î±-d-gal-diphosphoundecaprenol Î±-1,3-rhamnosyltransferase	9.21519e-06	4	9.31027e-06	6					1.17835e-05	6	4.40546e-06	3	1.32431e-06	1	1.498e-06	2	3.97215e-06	4	2.24524e-06	2			2.71813e-06	2	2.98959e-06	3	0	0			2.01466e-06	1	6.75505e-06	4	7.49128e-07	1			7.55083e-07	1			2.48441e-06	1	9.90425e-07	1
enzyme_ec	2.4.1.4	transferases glycosyltransferases hexosyltransferases amylosucrase	0.000224581	43	0.000218157	50	6.12367e-05	21	9.39848e-05	20	0.000225303	54	0.000270114	47	8.59143e-05	26	0.000116419	24	0.000140913	28	1.17718e-05	6	3.46955e-05	10	4.57462e-05	14	0.000135394	38	0.000116322	36	0.000138501	29	0.000145799	47	0.000158857	44	6.70137e-05	24	7.41988e-05	26	7.80904e-05	31	8.9037e-05	31	0.000106041	19	0.000270018	46	0.000221692
enzyme_ec	2.4.1.5	transferases glycosyltransferases hexosyltransferases dextransucrase	0.000513705	46	0.000128596	21	0.00028092	26	0.000129776	18	0.000350875	65	0.000276314	50	0.000119305	25	0.000424051	48	0.000276229	36	0.000189037	14	0.000330847	37	0.000186049	29	0.000509653	76	0.000542805	37	6.54349e-05	11	0.000448913	33	0.000449893	41	0.000475492	79	2.50764e-05	7	0.000116251	19	0.000363943	48	2.23418e-05	11	0.000362532	52	0.000299947
enzyme_ec	2.4.1.58	transferases glycosyltransferases hexosyltransferases lipopolysaccharide glucosyltransferase i	2.28436e-06	2	9.26818e-06	6	4.89889e-06	2	1.16278e-06	1	2.79616e-06	3	2.07979e-06	3	1.96878e-06	1	1.61774e-05	7	5.32507e-06	4			1.06242e-06	1	9.28994e-07	1	2.29218e-05	16			9.66659e-07	1	1.7664e-06	1	1.66529e-06	2	3.0486e-06	2	2.61432e-06	3					7.44088e-07	1	1.61376e-05	8	2.91786e-05
enzyme_ec	2.4.1.65	transferases glycosyltransferases hexosyltransferases 3-galactosyl-n-acetylglucosaminide 4-Î±-l-fucosyltransferase			3.06294e-05	6	3.82399e-05	6	1.48416e-05	3	6.8525e-06	3	7.21894e-06	3			7.77134e-06	2			6.20893e-05	6	1.0913e-05	4	3.82196e-06	2	1.58589e-05	6	8.95588e-06	3	2.51221e-05	4	1.25624e-05	5	2.01069e-06	1			3.01024e-05	5	1.25085e-05	4	6.93877e-06	3	3.61932e-05	5	1.91692e-05	4	1.55548e-05
enzyme_ec	2.4.1.7	transferases glycosyltransferases hexosyltransferases sucrose phosphorylase	4.34671e-06	2	5.07687e-05	18	2.13116e-05	8	4.15272e-06	2	3.09782e-05	11	6.05558e-05	21	0.00012707	29	0.00015579	25	6.68328e-05	16	1.6648e-05	6	5.48401e-05	20	6.19739e-05	13	7.86129e-05	21	0.000131472	34	7.73266e-06	3	8.45002e-05	27	5.45654e-05	22	6.59146e-05	22	1.66495e-05	9	9.10254e-05	25	5.06164e-05	16	7.01916e-05	18	2.39348e-05	7	8.61832e-05
enzyme_ec	2.4.1.83	transferases glycosyltransferases hexosyltransferases dolichyl-phosphate Î²-d-mannosyltransferase	1.97205e-05	9	1.93735e-05	11	4.80072e-07	1	4.88644e-06	2	1.26642e-05	7	1.0217e-05	4	1.19325e-05	6	5.2347e-06	4	4.77221e-06	3			8.57717e-06	5	1.38928e-05	7	4.74497e-05	17	2.28701e-05	9			6.22621e-06	5	1.6037e-05	9	5.647e-06	3	3.41918e-06	3			1.47513e-05	8	6.68791e-06	3	1.13644e-05	6
enzyme_ec	2.4.2.1	transferases glycosyltransferases pentosyltransferases purine-nucleoside phosphorylase	0.000682	93	0.00051624	126	0.000284955	56	0.000690722	116	0.000534689	84	0.000444034	98	0.000651029	102	0.000424154	82	0.000572051	72	0.000550159	103	0.000361983	80	0.000427539	83	0.000473502	82	0.00047366	74	0.000280839	48	0.000464107	103	0.000480863	110	0.000397156	104	0.000565021	105	0.000569123	118	0.000549188	118	0.000408352	80	0.00055682	115	0.000450715
enzyme_ec	2.4.2.10	transferases glycosyltransferases pentosyltransferases orotate phosphoribosyltransferase	0.000795788	116	0.000950432	188	0.00064345	109	0.000351726	72	0.00107248	156	0.00109391	159	0.00104513	159	0.000923568	130	0.000901859	139	0.000351029	70	0.000736958	142	0.00076419	130	0.00082946	172	0.000815415	133	0.000417429	72	0.00082634	150	0.000862323	162	0.000896024	169	0.000753234	128	0.000872084	151	0.000673749	150	0.000742479	125	0.000980003	161	0.00075257
enzyme_ec	2.4.2.14	transferases glycosyltransferases pentosyltransferases amidophosphoribosyltransferase	0.000429756	125	0.000527626	170	0.000535267	135	0.000243759	66	0.000585136	149	0.000535338	151	0.00058756	185	0.000524969	138	0.000504062	140	0.000211146	75	0.000325324	99	0.000422566	131	0.000674788	184	0.000532152	145	0.000427317	79	0.000538894	167	0.000611077	219	0.000418574	147	0.000396183	127	0.000468572	142	0.000373993	114	0.00036651	119	0.00049443	168	0.00048205
enzyme_ec	2.4.2.17	transferases glycosyltransferases pentosyltransferases atp phosphoribosyltransferase	5.51911e-05	18	0.000241831	41	0.000242074	33	4.28425e-05	12	8.62088e-05	26	0.000112897	37	0.000142865	49	9.33145e-05	18	6.12348e-05	18	3.96443e-05	18	6.8573e-05	29	7.97048e-05	29	0.000182513	50	0.000100263	36	4.75908e-05	18	8.70438e-05	39	0.000122283	53	0.000169603	39	0.000102726	37	0.000134565	45	5.84291e-05	26	0.000103862	33	8.5154e-05	37	0.000154721
enzyme_ec	2.4.2.18	transferases glycosyltransferases pentosyltransferases anthranilate phosphoribosyltransferase	2.63856e-05	12	6.25251e-05	31	4.31076e-05	17	6.63133e-06	3	0.000112077	36	8.19651e-05	25	2.64912e-05	14	0.000100796	32	5.15108e-05	24	1.66453e-05	10	2.49049e-05	16	2.10051e-05	12	7.23686e-05	26	0.000120921	45	2.92696e-05	8	3.37323e-05	22	7.11581e-05	25	6.75484e-05	31	5.43586e-05	22	3.60699e-05	18	9.2675e-06	5	3.03761e-05	19	5.03615e-05	19	3.56475e-05
enzyme_ec	2.4.2.19	transferases glycosyltransferases pentosyltransferases nicotinate-nucleotide diphosphorylase (carboxylating)	0.000180568	54	0.000287857	72	0.000375017	61	0.000400758	67	0.000244755	63	0.000187381	50	0.000329182	74	0.000221464	39	0.000157047	36	0.00050893	82	0.000249453	67	0.000156873	43	0.000327505	74	0.000193158	43	0.000117117	31	0.000213493	64	0.000302067	95	0.000160753	55	0.000413269	88	0.000329788	81	0.000379149	90	0.000287357	80	0.000327062	88	0.000216372
enzyme_ec	2.4.2.2	transferases glycosyltransferases pentosyltransferases pyrimidine-nucleoside phosphorylase	0.000104944	27	4.23941e-05	23	1.47875e-05	8	2.63446e-05	11	8.24503e-05	32	2.5912e-05	10	6.84341e-05	23	0.000120774	34	6.07038e-05	16	1.73719e-05	10	2.94438e-05	16	5.42664e-05	22	3.38408e-05	21	4.75264e-05	18	3.40743e-05	12	8.33757e-05	35	7.84184e-05	32	7.79316e-05	31	8.00609e-05	30	8.64989e-05	36	4.53109e-05	22	6.01134e-05	17	4.78493e-05	26	8.27987e-05
enzyme_ec	2.4.2.21	transferases glycosyltransferases pentosyltransferases nicotinate-nucleotideâ€”dimethylbenzimidazole phosphoribosyltransferase	1.6056e-05	9	1.0281e-05	10			1.75077e-06	1	1.80348e-05	9	1.25522e-05	7	1.13732e-05	10	4.34503e-06	3	8.98631e-06	3	1.23145e-06	1	1.03058e-06	1	6.77594e-06	4	6.33691e-06	5	1.43417e-06	1	6.60243e-06	3	3.15454e-06	2	1.72175e-05	14	2.3606e-06	3	4.14916e-06	3	1.23714e-06	2	1.73602e-06	2	1.50763e-05	7	1.32188e-05	7	5.99817e-06
enzyme_ec	2.4.2.22	transferases glycosyltransferases pentosyltransferases xanthine phosphoribosyltransferase	0.000197423	49	0.000222934	59	0.000127785	31	0.000137087	28	0.000306585	62	0.000251634	49	0.000184931	49	0.00025186	53	0.000208206	44	5.74444e-05	17	0.000152294	34	0.000181712	49	0.000202151	62	0.000265627	56	0.000114995	32	0.000153547	53	0.000184811	63	0.000206121	50	0.00014631	49	0.000305956	61	0.000124089	35	0.000207877	52	0.00018434	58	0.000226173
enzyme_ec	2.4.2.28	transferases glycosyltransferases pentosyltransferases s-methyl-5â€²-thioadenosine phosphorylase	1.35756e-06	1	2.24826e-05	8	1.13646e-05	4	1.62533e-05	7	1.44737e-06	2	6.93094e-06	6	1.32497e-05	8	6.94902e-06	4	1.10749e-05	2	2.74812e-06	2	6.81236e-07	1			2.22913e-06	3	4.82971e-06	4	1.98611e-05	6	1.44144e-06	2	1.48496e-05	5	3.89889e-06	3	1.48925e-05	6	2.01127e-05	3	5.15183e-07	1	3.32144e-06	3	1.68281e-06	2	3.65006e-05
enzyme_ec	2.4.2.29	transferases glycosyltransferases pentosyltransferases trna-guanosine34 preq1 transglycosylase	5.0783e-05	22	7.15509e-05	30	5.27516e-05	14	3.1919e-05	11	7.44635e-05	32	2.41445e-05	16	5.14384e-05	26	3.78851e-05	10	3.03351e-05	13	5.22911e-05	26	5.24468e-05	14	3.21429e-05	13	4.09354e-05	22	6.01013e-05	26	3.6174e-05	12	4.96352e-05	24	7.65616e-05	40	5.24803e-05	20	6.15804e-05	30	9.0962e-05	36	3.114e-05	18	3.77876e-05	16	5.39134e-05	26	5.927e-05
enzyme_ec	2.4.2.3	transferases glycosyltransferases pentosyltransferases uridine phosphorylase	9.87682e-05	24	0.00013719	28	0.000146067	23	0.000229065	28	2.91799e-05	10	9.59707e-05	19	0.000176785	21	1.76895e-05	8	0.000273661	16	0.000122771	17	4.12402e-05	11	7.65445e-05	16	7.99399e-05	21	0.00015548	19	9.60212e-06	4	4.42473e-05	17	7.99025e-05	22	6.87742e-05	11	0.000129694	32	0.000133254	31	0.00013312	30	8.41189e-05	18	0.000108957	26	0.000114477
enzyme_ec	2.4.2.59	transferases glycosyltransferases pentosyltransferases sulfide-dependent adenosine diphosphate thiazole synthase	1.10427e-05	6			2.66276e-05	5			2.61086e-05	9			1.59848e-05	9	2.96949e-06	1	2.19779e-06	1	1.53284e-06	1	9.30284e-07	1	2.09959e-05	6			1.22737e-06	1	1.16584e-06	1			8.17215e-06	4	1.65153e-06	2	4.17793e-06	4	2.04883e-06	2	9.34564e-06	4	3.04061e-05	8	5.49399e-06	4	1.55734e-05
enzyme_ec	2.4.2.7	transferases glycosyltransferases pentosyltransferases adenine phosphoribosyltransferase	0.000125531	33	0.000204386	70	9.2469e-05	31	7.51638e-05	20	0.000272637	62	0.000154481	49	0.000176872	48	0.000231236	47	0.000133817	28	5.07026e-05	20	0.00014182	40	0.000125983	46	0.000248487	68	0.000206164	53	4.59619e-05	19	0.000134904	50	0.000236112	65	0.000202741	64	0.000121246	45	0.000224873	58	0.000201007	56	0.000136775	39	0.000130532	43	0.000167559
enzyme_ec	2.4.2.8	transferases glycosyltransferases pentosyltransferases hypoxanthine phosphoribosyltransferase	0.000298684	72	0.000323537	84	0.0001876	55	0.000130613	44	0.000326638	74	0.000337663	84	0.00025888	72	0.000286934	59	0.000186662	46	8.06134e-05	29	0.000175623	57	0.000227798	62	0.000296205	79	0.000250083	62	0.000144642	35	0.00024096	78	0.000285002	73	0.000205703	74	0.000236467	65	0.000339978	93	0.000199319	70	0.000190765	54	0.000310504	74	0.000292548
enzyme_ec	2.4.2.9	transferases glycosyltransferases pentosyltransferases uracil phosphoribosyltransferase	0.000756619	137	0.000897899	198	0.000719844	166	0.000716764	124	0.000930975	140	0.000780011	180	0.000840722	149	0.000689669	128	0.000498452	105	0.000257568	87	0.000901375	166	0.000681841	127	0.000867165	197	0.000929813	157	0.00038488	80	0.000843982	168	0.000619606	184	0.00107195	195	0.000933772	187	0.00114782	212	0.00102229	184	0.000958149	170	0.000703616	180	0.00108345
enzyme_ec	2.4.99.12	transferases glycosyltransferases transferring other glycosyl groups lipid iva 3-deoxy-d-manno-octulosonic acid transferase			1.54018e-05	10	3.98034e-06	3	6.35888e-06	4			3.96916e-07	1	2.55276e-06	2							1.64271e-06	2			1.71212e-05	6					8.86963e-07	2	4.74381e-06	6			7.07375e-07	1	5.64033e-06	1	8.86791e-07	1	1.47106e-06	1			1.12877e-05
enzyme_ec	2.4.99.13	transferases glycosyltransferases transferring other glycosyl groups (kdo)-lipid iva 3-deoxy-d-manno-octulosonic acid transferase			1.54018e-05	10	3.98034e-06	3	6.35888e-06	4			3.96916e-07	1	2.55276e-06	2							1.64271e-06	2			1.71212e-05	6					8.86963e-07	2	4.74381e-06	6			7.07375e-07	1	5.64033e-06	1	8.86791e-07	1	1.47106e-06	1			1.12877e-05
enzyme_ec	2.4.99.14	transferases glycosyltransferases transferring other glycosyl groups (kdo)2-lipid iva (2-8) 3-deoxy-d-manno-octulosonic acid transferase			1.54018e-05	10	3.98034e-06	3	6.35888e-06	4			3.96916e-07	1	2.55276e-06	2							1.64271e-06	2			1.71212e-05	6					8.86963e-07	2	4.74381e-06	6			7.07375e-07	1	5.64033e-06	1	8.86791e-07	1	1.47106e-06	1			1.12877e-05
enzyme_ec	2.4.99.15	transferases glycosyltransferases transferring other glycosyl groups (kdo)3-lipid iva (2-4) 3-deoxy-d-manno-octulosonic acid transferase			1.54018e-05	10	3.98034e-06	3	6.35888e-06	4			3.96916e-07	1	2.55276e-06	2							1.64271e-06	2			1.71212e-05	6					8.86963e-07	2	4.74381e-06	6			7.07375e-07	1	5.64033e-06	1	8.86791e-07	1	1.47106e-06	1			1.12877e-05
enzyme_ec	2.4.99.16	transferases glycosyltransferases transferring other glycosyl groups starch synthase (maltosyl-transferring)			6.23474e-07	1	3.47429e-06	3	7.30669e-06	4	1.44494e-05	8	7.54659e-06	5	1.29429e-05	6	0.000171025	20	0.000104306	22	1.06146e-05	4	2.61385e-05	11	5.06129e-06	5	1.08154e-05	4	5.75238e-05	19			4.75235e-05	16	2.55481e-05	11	1.39054e-05	8	1.29112e-05	8	2.6112e-05	15	4.73167e-05	12	2.99167e-05	9	8.16253e-07	2	6.17658e-05
enzyme_ec	2.4.99.17	transferases glycosyltransferases transferring other glycosyl groups s-adenosylmethionine:trna ribosyltransferase-isomerase	0.000163668	45	0.000198976	62	0.000118771	35	3.50115e-05	9	0.000202119	61	0.000218567	46	0.000300896	65	0.000113036	28	0.000128336	30	6.02707e-05	20	0.000105764	32	0.000155538	44	0.000185297	42	0.000223242	58	0.000105337	33	0.000108381	43	0.000213339	60	0.000122712	47	0.000145027	37	0.000141221	48	0.000123932	38	0.000137053	44	0.000151356	43	0.000162488
enzyme_ec	2.4.99.20	transferases glycosyltransferases transferring other glycosyl groups 2â€²-phospho-adp-ribosyl cyclase/2â€²-phospho-cyclic-adp-ribose transferase	3.04983e-06	2	1.2372e-05	4	1.26726e-05	4	2.44438e-05	4	2.535e-05	4	2.62991e-05	4	3.21868e-05	6	5.43297e-06	1	2.7944e-05	3	6.53316e-05	8	2.60448e-05	5	3.7492e-05	5	2.56242e-06	2	1.03362e-05	3	1.87363e-05	4	1.96672e-05	6	2.64154e-05	5	4.12311e-05	6	1.40266e-05	4			3.8728e-05	6	4.87535e-05	7	1.62491e-05	4	1.91681e-05
enzyme_ec	2.4.99.23	transferases glycosyltransferases transferring other glycosyl groups lipopolysaccharide heptosyltransferase i	3.18756e-05	2	2.84097e-05	1					2.89192e-05	2	2.29751e-05	2					3.05381e-05	2							4.6808e-05	2
enzyme_ec	2.5.1.1	transferases transferring alkyl or aryl groups, other than methyl groups transferring alkyl or aryl groups, other than methyl groups (only sub-subclass identified to date) dimethylallyltranstransferase	2.2521e-05	17	8.09334e-05	31	4.73389e-05	17	1.12566e-05	6	2.71154e-05	17	3.70134e-05	16	5.41825e-05	28	4.13671e-05	17	1.74622e-05	8	3.80756e-05	8	1.60089e-05	14	1.40602e-05	11	5.41379e-05	26	4.56275e-05	24	9.26083e-06	4	3.31258e-05	17	4.18354e-05	25	2.15727e-05	15	4.62611e-05	22	3.75209e-05	18	2.97996e-05	18	4.46684e-05	23	3.54398e-05	22	6.57344e-05
enzyme_ec	2.5.1.10	transferases transferring alkyl or aryl groups, other than methyl groups transferring alkyl or aryl groups, other than methyl groups (only sub-subclass identified to date) (2e,6e)-farnesyl diphosphate synthase	2.2521e-05	17	8.09334e-05	31	4.73389e-05	17	1.12566e-05	6	2.71154e-05	17	3.70134e-05	16	5.41825e-05	28	4.13671e-05	17	1.74622e-05	8	3.80756e-05	8	1.60089e-05	14	1.40602e-05	11	5.41379e-05	26	4.56275e-05	24	9.26083e-06	4	3.31258e-05	17	4.18354e-05	25	2.15727e-05	15	4.62611e-05	22	3.75209e-05	18	2.97996e-05	18	4.46684e-05	23	3.54398e-05	22	6.57344e-05
enzyme_ec	2.5.1.101	transferases transferring alkyl or aryl groups, other than methyl groups transferring alkyl or aryl groups, other than methyl groups (only sub-subclass identified to date) n,nâ€²-diacetyllegionaminate synthase	9.70484e-06	7	5.14987e-06	4	0	0	0	0	1.25538e-05	7	9.62974e-06	9	3.40123e-06	4	5.54506e-06	5	1.11765e-05	6			6.8772e-06	6	4.29708e-05	11	9.03151e-06	6	4.57182e-06	4			1.07958e-05	5	9.09112e-06	9	1.41981e-05	8	4.95767e-06	4	5.01682e-06	4	5.84109e-06	5	0	0	8.58319e-07	1	3.78865e-06
enzyme_ec	2.5.1.105	transferases transferring alkyl or aryl groups, other than methyl groups transferring alkyl or aryl groups, other than methyl groups (only sub-subclass identified to date) 7,8-dihydropterin-6-yl-methyl-4-(Î²-d-ribofuranosyl)aminobenzene 5â€²-phosphate synthase			2.69206e-07	1					2.23766e-06	2											1.36684e-06	1			1.27756e-06	1	5.09146e-07	1					1.58111e-05	2			5.72096e-07	1							0	0	3.36207e-06
enzyme_ec	2.5.1.132	transferases transferring alkyl or aryl groups, other than methyl groups transferring alkyl or aryl groups, other than methyl groups (only sub-subclass identified to date) 3-deoxy-d-glycero-d-galacto-nonulopyranosonate 9-phosphate synthase	2.39495e-06	2	2.20073e-06	2	2.17789e-06	1			4.34419e-07	1					1.41386e-06	2			1.68708e-06	2	2.67209e-07	1	7.61106e-07	1	2.08977e-05	8					1.15786e-05	4	6.02006e-07	1									4.97967e-06	2	7.16302e-07	1
enzyme_ec	2.5.1.143	transferases transferring alkyl or aryl groups, other than methyl groups transferring alkyl or aryl groups, other than methyl groups (only sub-subclass identified to date) pyridinium-3,5-biscarboxylic acid mononucleotide synthase			1.97537e-06	3					1.28852e-06	1							5.26556e-07	1					1.17513e-06	1			8.26732e-07	1					2.2486e-06	3			1.39755e-06	1			4.94882e-07	1			8.30571e-07	1	2.31741e-06
enzyme_ec	2.5.1.15	transferases transferring alkyl or aryl groups, other than methyl groups transferring alkyl or aryl groups, other than methyl groups (only sub-subclass identified to date) dihydropteroate synthase	3.66112e-05	14	2.24341e-05	10	2.82459e-05	15	9.27963e-06	5	4.86464e-05	16	2.64931e-05	12	2.02885e-05	14	1.78052e-05	10	3.93916e-05	17	1.50797e-05	10	9.33119e-06	6	1.84022e-05	8	4.44214e-05	19	0.000146403	14	1.41655e-05	9	4.14265e-05	22	4.91568e-05	18	1.81496e-05	11	1.63875e-05	8	3.26573e-05	16	2.69128e-05	13	1.33175e-05	8	4.87586e-05	16	5.31472e-05
enzyme_ec	2.5.1.154	transferases transferring alkyl or aryl groups, other than methyl groups transferring alkyl or aryl groups, other than methyl groups (only sub-subclass identified to date) corrinoid adenosyltransferase eutt			4.52481e-06	4	1.14715e-06	1	2.74169e-06	1			2.22625e-06	1	4.73185e-07	1	1.54464e-06	2	4.05359e-06	1	1.95507e-06	1	2.14012e-06	2									2.43761e-06	1	3.3712e-06	3	1.21945e-06	1			9.76643e-07	1					5.28473e-06	3	2.43018e-06
enzyme_ec	2.5.1.16	transferases transferring alkyl or aryl groups, other than methyl groups transferring alkyl or aryl groups, other than methyl groups (only sub-subclass identified to date) spermidine synthase	1.74056e-05	6	1.60791e-05	7	1.44075e-05	3	7.70672e-06	2	2.56222e-05	6	5.63691e-06	1	4.66806e-05	15	2.80253e-05	8	2.67605e-05	8	5.91535e-05	11	5.02858e-06	3	1.95773e-05	7	2.2077e-05	9	1.64266e-05	5	5.13847e-05	9	5.15371e-05	13	1.0468e-05	5	2.30185e-05	10	6.0051e-05	12	2.30088e-05	7	3.11034e-05	11	3.31535e-05	11	3.65373e-05	13	1.8474e-05
enzyme_ec	2.5.1.17	transferases transferring alkyl or aryl groups, other than methyl groups transferring alkyl or aryl groups, other than methyl groups (only sub-subclass identified to date) corrinoid adenosyltransferase	3.70823e-05	17	3.05749e-05	22	3.02826e-05	9	1.38206e-05	5	2.37737e-05	14	2.27203e-05	11	3.33221e-05	15	2.80288e-05	11	1.92762e-05	14	9.1927e-06	4	1.63383e-05	9	1.67078e-05	11	4.19145e-05	27	3.4752e-05	16	2.25717e-05	7	3.15561e-05	18	5.18012e-05	36	2.53084e-05	13	1.94829e-05	12	3.4815e-05	22	2.29084e-05	11	2.44531e-05	12	3.19374e-05	24	7.58848e-05
enzyme_ec	2.5.1.19	transferases transferring alkyl or aryl groups, other than methyl groups transferring alkyl or aryl groups, other than methyl groups (only sub-subclass identified to date) 3-phosphoshikimate 1-carboxyvinyltransferase	2.04557e-05	13	2.29876e-05	15	1.80971e-05	12	2.18935e-06	2	6.42281e-05	27	3.57625e-05	19	1.18755e-05	14	2.46133e-05	16	2.82999e-05	14	3.22757e-05	5	7.68877e-06	5	1.21458e-05	6	1.51953e-05	8	1.9738e-05	11	1.58747e-05	7	4.54919e-05	16	1.95115e-05	13	1.15742e-05	11	5.56451e-06	6	1.60511e-05	15	1.77959e-05	12	1.16402e-05	10	2.06556e-05	13	3.6639e-05
enzyme_ec	2.5.1.29	transferases transferring alkyl or aryl groups, other than methyl groups transferring alkyl or aryl groups, other than methyl groups (only sub-subclass identified to date) geranylgeranyl diphosphate synthase	1.72814e-05	13	7.40811e-05	24	4.33174e-05	15	6.09921e-06	3	9.13251e-06	9	3.01694e-05	13	4.14316e-05	23	2.59719e-05	13	7.92174e-06	6	3.80756e-05	8	9.73206e-06	9	7.70372e-06	8	5.04796e-05	24	3.95536e-05	22	6.86231e-07	1	3.16272e-05	16	3.67935e-05	20	1.61651e-05	12	1.60474e-05	11	2.58354e-05	12	2.02188e-05	13	4.07638e-05	22	2.34746e-05	15	5.86043e-05
enzyme_ec	2.5.1.3	transferases transferring alkyl or aryl groups, other than methyl groups transferring alkyl or aryl groups, other than methyl groups (only sub-subclass identified to date) thiamine phosphate synthase	8.42413e-05	34	2.32185e-05	15	1.75171e-05	11	1.51208e-05	7	5.59446e-05	21	1.90001e-05	13	2.55083e-05	15	3.44262e-05	16	2.03562e-05	16	1.75426e-05	5	1.40032e-05	9	1.58815e-05	9	1.17222e-05	8	4.04114e-05	22	3.63428e-06	2	1.61157e-05	16	4.08171e-05	25	2.67174e-05	21	2.09213e-05	11	5.10894e-05	33	2.70238e-05	12	5.7553e-05	27	3.37617e-05	18	7.98095e-05
enzyme_ec	2.5.1.31	transferases transferring alkyl or aryl groups, other than methyl groups transferring alkyl or aryl groups, other than methyl groups (only sub-subclass identified to date) ditrans,polycis-undecaprenyl-diphosphate synthase [(2e,6e)-farnesyl-diphosphate specific]	2.33029e-05	15	4.04762e-05	20	5.10358e-05	21	6.29663e-06	5	3.41976e-05	16	2.90246e-05	13	4.19625e-05	21	3.5839e-05	15	1.59634e-05	8	6.94398e-06	4	7.62342e-06	5	1.98183e-05	9	2.73562e-05	15	4.16288e-05	17	1.78986e-05	7	4.87384e-05	21	1.17668e-05	8	2.05257e-05	12	2.48156e-05	12	2.609e-05	13	3.13893e-05	15	2.13464e-05	11	9.75471e-06	9	5.9647e-05
enzyme_ec	2.5.1.47	transferases transferring alkyl or aryl groups, other than methyl groups transferring alkyl or aryl groups, other than methyl groups (only sub-subclass identified to date) cysteine synthase	0.00129628	214	0.00105523	237	0.00108837	211	0.00105634	178	0.00139197	199	0.00109602	207	0.00118874	229	0.00113524	194	0.00176511	230	0.000766387	141	0.000686237	174	0.001115	198	0.00131485	289	0.00210417	265	0.000577971	115	0.000892262	206	0.00113775	248	0.00123143	236	0.00173725	243	0.00138512	238	0.000950802	197	0.00124028	206	0.000755382	171	0.000747025
enzyme_ec	2.5.1.48	transferases transferring alkyl or aryl groups, other than methyl groups transferring alkyl or aryl groups, other than methyl groups (only sub-subclass identified to date) cystathionine Î³-synthase	7.19581e-05	14	2.87209e-07	1	2.84881e-06	2	0	0	4.94498e-05	14	1.56379e-05	6	0.000163839	17	1.1369e-05	5	2.46635e-06	2			5.07819e-05	12	8.318e-05	20	5.08208e-05	19	2.89832e-06	2			8.8631e-06	5	7.31842e-05	19	0.000154479	26			9.17188e-07	1	1.47921e-05	6	7.23236e-05	14	4.51958e-05	11	1.23095e-05
enzyme_ec	2.5.1.49	transferases transferring alkyl or aryl groups, other than methyl groups transferring alkyl or aryl groups, other than methyl groups (only sub-subclass identified to date) o-acetylhomoserine aminocarboxypropyltransferase	0.0011573	197	0.00119898	284	0.00140686	230	0.000447236	86	0.00133206	214	0.00119893	233	0.00131484	241	0.000996562	145	0.00112141	136	0.000582154	106	0.000919232	206	0.00139166	222	0.00193767	309	0.0020515	274	0.00062817	96	0.00105441	217	0.00175998	328	0.00101376	230	0.00130207	242	0.0010744	210	0.000731814	147	0.00122256	223	0.000822012	200	0.00111184
enzyme_ec	2.5.1.54	transferases transferring alkyl or aryl groups, other than methyl groups transferring alkyl or aryl groups, other than methyl groups (only sub-subclass identified to date) 3-deoxy-7-phosphoheptulonate synthase	0.000421463	112	0.000356024	139	0.000292492	96	0.00012841	46	0.000729872	175	0.000549441	149	0.000389322	122	0.000377805	117	0.000386004	102	8.72724e-05	36	0.00016534	60	0.000273736	90	0.000370099	134	0.000489718	134	0.000314914	67	0.000442457	133	0.000397427	147	0.000438209	139	0.000295329	98	0.000398947	119	0.000268608	99	0.000254778	80	0.000352614	117	0.000352205
enzyme_ec	2.5.1.55	transferases transferring alkyl or aryl groups, other than methyl groups transferring alkyl or aryl groups, other than methyl groups (only sub-subclass identified to date) 3-deoxy-8-phosphooctulonate synthase	1.76131e-05	10	3.40369e-05	14	1.40724e-05	7	2.82086e-05	10	9.84975e-06	6	3.12565e-05	14	5.31993e-05	15	2.98465e-06	3	6.38772e-06	3	9.02173e-06	8	9.83118e-06	4	2.90442e-05	13	3.85993e-05	13	2.53329e-05	10	5.27774e-06	4	3.36289e-05	15	3.09158e-05	16	6.53437e-05	20	1.69762e-05	9	6.63889e-06	6	2.08301e-05	12	3.55913e-06	2	1.75366e-05	8	5.23301e-05
enzyme_ec	2.5.1.56	transferases transferring alkyl or aryl groups, other than methyl groups transferring alkyl or aryl groups, other than methyl groups (only sub-subclass identified to date) n-acetylneuraminate synthase					2.17789e-06	1					2.91149e-06	2	4.19894e-05	11	9.02906e-05	9	1.74746e-06	1	1.68708e-06	2	1.18555e-05	6	1.5536e-05	6	1.37187e-05	5					1.2004e-05	4	3.25281e-06	5			4.1365e-05	9					4.97967e-06	2	9.71172e-06	6
enzyme_ec	2.5.1.6	transferases transferring alkyl or aryl groups, other than methyl groups transferring alkyl or aryl groups, other than methyl groups (only sub-subclass identified to date) methionine adenosyltransferase	0.00148716	188	0.00134638	212	0.00146023	198	0.00119345	145	0.00222784	185	0.00129672	179	0.00122356	183	0.0011098	143	0.00111783	139	0.00126141	161	0.00116959	182	0.00141878	186	0.00135439	232	0.00151382	203	0.00135915	139	0.00135567	201	0.0017532	275	0.00149473	228	0.00119331	179	0.00140299	204	0.00111781	164	0.00135424	159	0.00132479	203	0.00139543
enzyme_ec	2.5.1.61	transferases transferring alkyl or aryl groups, other than methyl groups transferring alkyl or aryl groups, other than methyl groups (only sub-subclass identified to date) hydroxymethylbilane synthase	3.78904e-07	1	1.80865e-06	1			1.41687e-05	6	1.08931e-05	8	5.38304e-06	2	2.50065e-06	2	1.80872e-06	1	5.69386e-06	3	1.35347e-06	1	1.42128e-06	2					1.04204e-06	1			1.30839e-06	2	7.15097e-06	8	5.05348e-07	1			2.65656e-06	2	1.73382e-06	2	1.29311e-06	1	1.00775e-05	5	1.82268e-06
enzyme_ec	2.5.1.7	transferases transferring alkyl or aryl groups, other than methyl groups transferring alkyl or aryl groups, other than methyl groups (only sub-subclass identified to date) udp-n-acetylglucosamine 1-carboxyvinyltransferase	0.000127027	44	0.000188437	59	0.000230423	56	0.00157453	19	0.000139834	57	0.00011021	42	0.000126793	55	0.00016018	53	0.000116957	42	2.13146e-05	12	9.0754e-05	41	0.0018766	36	0.000114086	44	0.00199463	61	0.000141008	39	0.000103732	47	0.00134381	62	9.70972e-05	51	0.00136193	39	0.000123409	60	7.23257e-05	29	0.000340061	48	8.45898e-05	41	0.00030319
enzyme_ec	2.5.1.72	transferases transferring alkyl or aryl groups, other than methyl groups transferring alkyl or aryl groups, other than methyl groups (only sub-subclass identified to date) quinolinate synthase	5.99028e-05	18	9.26802e-05	38	9.62363e-05	30	2.77486e-05	11	0.000130656	40	7.38282e-05	24	0.00011497	34	4.57141e-05	13	9.29917e-05	29	4.25188e-05	12	4.02784e-05	17	6.12172e-05	16	8.53812e-05	35	6.03778e-05	24	6.34632e-05	18	9.48883e-05	26	8.4506e-05	32	4.73061e-05	22	9.1032e-05	39	8.92302e-05	39	7.10804e-05	26	9.33676e-05	35	6.81032e-05	24	8.01242e-05
enzyme_ec	2.5.1.74	transferases transferring alkyl or aryl groups, other than methyl groups transferring alkyl or aryl groups, other than methyl groups (only sub-subclass identified to date) 1,4-dihydroxy-2-naphthoate polyprenyltransferase									3.17963e-06	1
enzyme_ec	2.5.1.75	transferases transferring alkyl or aryl groups, other than methyl groups transferring alkyl or aryl groups, other than methyl groups (only sub-subclass identified to date) trna dimethylallyltransferase	6.04703e-06	5	1.00711e-05	7	2.9034e-06	1	6.7421e-07	1	3.90915e-06	3	1.0908e-06	1	1.67514e-05	10	9.17495e-06	6	3.32138e-06	3			3.47479e-06	3	3.84801e-06	3	1.74957e-05	9	8.67645e-06	4	0	0	5.74043e-07	1	6.9104e-06	6	3.4393e-07	1	4.14851e-06	3	9.67993e-07	2			5.07536e-06	4	5.76878e-06	5	9.24135e-06
enzyme_ec	2.5.1.78	transferases transferring alkyl or aryl groups, other than methyl groups transferring alkyl or aryl groups, other than methyl groups (only sub-subclass identified to date) 6,7-dimethyl-8-ribityllumazine synthase	0.000352093	34	0.000206134	42	0.000259156	35	0.000358965	38	0.000267553	29	0.000242493	32	0.000261553	43	0.000289169	28	0.00025345	21	0.000839147	58	0.00026414	42	0.000322902	37	0.000180865	39	0.0002982	37	0.000325138	31	0.000332769	46	0.000367953	59	0.000350718	55	0.000407823	55	0.000411023	53	0.00033854	55	0.000223569	39	0.000289793	53	0.000274392
enzyme_ec	2.5.1.9	transferases transferring alkyl or aryl groups, other than methyl groups transferring alkyl or aryl groups, other than methyl groups (only sub-subclass identified to date) riboflavin synthase	1.20578e-05	6	1.55688e-05	11	1.18176e-05	3	1.43156e-06	1	1.51952e-05	10	1.02238e-05	7	2.673e-05	10	1.7684e-05	8	1.12259e-05	6	3.48259e-05	13	9.3283e-06	6	3.07917e-05	9	1.41002e-05	7	1.54873e-05	9	2.63594e-05	5	8.41838e-06	6	2.56768e-05	19	3.86976e-05	16	1.05632e-05	6	3.51785e-05	15	1.03505e-05	7	2.87493e-06	2	2.50601e-05	13	3.37945e-05
enzyme_ec	2.5.1.90	transferases transferring alkyl or aryl groups, other than methyl groups transferring alkyl or aryl groups, other than methyl groups (only sub-subclass identified to date) all-trans-octaprenyl-diphosphate synthase			1.21347e-05	7	8.96362e-06	4			6.94104e-06	3	5.60484e-06	6	1.15193e-05	8			5.73753e-07	1	4.04855e-05	8	2.84271e-06	3			1.3744e-05	5	6.62164e-06	5			5.38547e-06	1	7.70877e-06	8	4.55733e-06	3	5.75985e-06	3	2.61052e-06	2	7.17652e-06	7	5.19944e-06	4	3.59927e-06	5	9.01916e-06
enzyme_ec	2.6.1.-		0.000118192	69	0.000161177	61	0.000197759	67	0.00010304	31	0.000183284	62	0.000234461	79	0.000282852	107	0.000138372	59	6.62511e-05	32	0.000115241	40	9.98104e-05	44	0.00016924	59	0.000172025	86	0.00021972	79	0.000234327	60	0.00023615	103	0.000277305	111	0.000237829	103	0.000170538	87	0.000223241	98	0.000258075	80	0.000129879	62	0.000159696	77	0.000337152
enzyme_ec	2.6.1.1	transferases transferring nitrogenous groups transaminases aspartate transaminase	0.000697676	139	0.000709886	172	0.00107127	198	0.00121763	180	0.000618005	143	0.000783969	183	0.000765586	179	0.000582759	152	0.000527992	136	0.00100038	185	0.000686814	159	0.000805332	139	0.00110658	227	0.000929822	174	0.00104848	158	0.000631117	194	0.000825508	195	0.000686322	178	0.0006789	179	0.00067668	206	0.000754568	196	0.00151232	191	0.000683285	172	0.000790992
enzyme_ec	2.6.1.102	transferases transferring nitrogenous groups transaminases gdp-perosamine synthase	5.10209e-05	19	7.83968e-06	9	1.77787e-06	3	5.39339e-05	11	3.00342e-05	9	7.20883e-05	17	4.01322e-05	12	9.52659e-06	5	4.40654e-06	4	0.000155399	32	1.60854e-05	6	3.39143e-06	3	5.853e-06	6	2.29017e-05	6	1.51456e-05	6	2.01929e-05	8	3.00591e-05	15	2.12196e-05	14	4.47968e-05	24	1.34013e-05	9	2.49211e-05	14	2.43014e-05	6	3.87644e-05	14	8.54806e-06
enzyme_ec	2.6.1.109	transferases transferring nitrogenous groups transaminases 8-amino-3,8-dideoxy-Î±-d-manno-octulosonate transaminase																			1.77038e-06	1																	1.55696e-05	9
enzyme_ec	2.6.1.11	transferases transferring nitrogenous groups transaminases acetylornithine transaminase	0.00121775	101	0.00105101	184	0.00125029	136	0.00221269	102	0.00119331	157	0.00132488	163	0.00119923	181	0.00128893	131	0.00105998	106	0.00224865	153	0.00108622	131	0.000704436	103	0.00107486	175	0.00126177	140	0.00107924	92	0.00118397	150	0.00104918	206	0.000981686	118	0.00171943	185	0.00127117	153	0.00077311	111	0.000866344	122	0.00131164	163	0.00119894
enzyme_ec	2.6.1.112	transferases transferring nitrogenous groups transaminases (s)-ureidoglycineâ€”glyoxylate transaminase																																							1.0366e-06	1
enzyme_ec	2.6.1.117	transferases transferring nitrogenous groups transaminases l-glutamineâ€”4-(methylsulfanyl)-2-oxobutanoate aminotransferase	2.42556e-05	14	7.87532e-05	26	3.25921e-05	14	2.41202e-05	7	9.12056e-06	7	9.71047e-06	8	7.27041e-05	22	1.41921e-06	1	1.3079e-05	7	1.64199e-05	7	1.15094e-05	8	5.58199e-06	3	1.46803e-05	7	3.32434e-05	13	5.94551e-06	2	1.90347e-05	11	4.83424e-05	21	2.71688e-06	3	1.95028e-05	10	1.44403e-05	9	1.61677e-05	9	1.41219e-05	10	4.76294e-05	19	3.43276e-05
enzyme_ec	2.6.1.120	transferases transferring nitrogenous groups transaminases Î²-alanineâ€”2-oxoglutarate transaminase	3.11231e-05	8	2.14933e-06	2	5.17355e-05	17	9.40146e-05	12	0.000147295	25	1.60627e-05	9	3.03582e-05	8	3.07091e-05	10	4.40325e-05	13	0.000300204	31	0.000147294	15	6.3721e-06	4	9.46363e-05	35	3.84111e-05	13	0.000217496	24	5.85739e-05	17	7.65336e-07	1	7.8451e-06	6	0.000132204	26	4.36594e-05	18			1.48458e-05	6	5.34287e-05	22	1.88359e-05
enzyme_ec	2.6.1.13	transferases transferring nitrogenous groups transaminases ornithine aminotransferase	4.89399e-05	14	8.35171e-05	24	1.21342e-06	2	3.75441e-06	3	9.65502e-05	21	1.1869e-05	5	0.000118055	30	6.10072e-06	3	2.82059e-05	9	5.77708e-05	13	3.69409e-05	9	6.41472e-05	16	6.14075e-06	3	1.60855e-05	6	6.59696e-06	3	1.0393e-05	7	7.84414e-05	18	7.42424e-06	5	2.17205e-05	9	1.04763e-05	8	2.98705e-05	12	3.7478e-05	13	6.03688e-05	15	6.43716e-06
enzyme_ec	2.6.1.16	transferases transferring nitrogenous groups transaminases glutamineâ€”fructose-6-phosphate transaminase (isomerizing)	0.000307388	123	0.000303401	128	0.000326371	103	9.58533e-05	32	0.000454917	118	0.000338235	111	0.000372184	142	0.000275656	91	0.000170431	64	0.000183082	67	0.000855223	91	0.000257864	75	0.000400242	131	0.000299664	111	0.000485001	78	0.000308305	130	0.00033582	152	0.000264832	109	0.000154296	67	0.000268345	106	0.000185565	71	0.000292982	98	0.00020044	96	0.000337552
enzyme_ec	2.6.1.17	transferases transferring nitrogenous groups transaminases succinyldiaminopimelate transaminase	0.00120893	97	0.00104043	182	0.00125029	136	0.0022034	100	0.001181	155	0.00129497	157	0.00119751	181	0.00123896	126	0.00106667	109	0.00223395	150	0.0010826	129	0.000704436	103	0.0010706	172	0.00125095	138	0.00107573	91	0.00118561	151	0.00104895	205	0.000976571	115	0.00171644	184	0.00126785	151	0.00077311	111	0.000850858	120	0.00131164	163	0.00119568
enzyme_ec	2.6.1.19	transferases transferring nitrogenous groups transaminases 4-aminobutyrateâ€”2-oxoglutarate transaminase	0.000113	27	2.27807e-05	16	0.000169883	41	2.78472e-05	8	2.0855e-06	2	4.45758e-05	19	1.03095e-05	6	0.000124367	30	3.83799e-05	12	0.000112595	25	3.22636e-05	16	4.03978e-05	13	5.63262e-05	24	7.36304e-05	17	0.000152051	21	4.25077e-05	15	6.68668e-05	30	3.33555e-06	3	4.57124e-05	18	4.3062e-05	17	2.71008e-05	11	1.38304e-05	8	2.93523e-05	15	7.45941e-05
enzyme_ec	2.6.1.2	transferases transferring nitrogenous groups transaminases alanine transaminase	0.000140108	29	0.00020326	57	0.000220293	45	4.24837e-05	11	0.000236884	53	0.000197795	40	0.000147459	39	0.0003499	55	0.000102361	28	4.45801e-05	12	8.56974e-05	26	0.000200718	53	0.000399019	76	0.000136214	37	0.000457502	46	0.000158892	43	0.000160206	50	0.000145607	45	0.000100492	39	0.000171842	49	9.89446e-05	32	0.000140204	35	0.000243267	47	0.000127174
enzyme_ec	2.6.1.21	transferases transferring nitrogenous groups transaminases d-amino-acid transaminase	1.93128e-05	11	4.57476e-05	21	2.21117e-05	12	8.46164e-05	19	3.34998e-05	11	2.45555e-05	13	3.07362e-05	11	6.10214e-06	5	1.33869e-05	5	6.29583e-05	16	4.6334e-05	18	1.37816e-05	7	6.0963e-05	24	3.50529e-05	13	5.33705e-05	10	2.46923e-05	12	2.86115e-05	12	3.38231e-05	17	0.000143758	29	1.6587e-05	11	1.52002e-05	8	8.68826e-06	6	6.32462e-05	27	9.18126e-05
enzyme_ec	2.6.1.22	transferases transferring nitrogenous groups transaminases (s)-3-amino-2-methylpropionate transaminase	0.000113	27	2.27807e-05	16	0.000168828	40	2.78472e-05	8	1.04148e-06	1	4.32868e-05	18	1.03095e-05	6	0.000124367	30	3.83799e-05	12	0.000110355	23	3.16202e-05	15	3.9182e-05	12	5.63262e-05	24	7.36304e-05	17	0.000148506	19	4.25077e-05	15	6.61959e-05	29	3.33555e-06	3	3.94671e-05	16	4.3062e-05	17	2.63908e-05	10	8.94911e-06	6	2.93523e-05	15	7.41791e-05
enzyme_ec	2.6.1.33	transferases transferring nitrogenous groups transaminases dtdp-4-amino-4,6-dideoxy-d-glucose transaminase	5.71012e-06	3	2.02433e-05	8	1.30195e-06	2			2.16164e-06	1	3.88702e-06	2	1.18135e-05	6					4.39164e-06	1	3.80516e-05	11			7.12608e-07	1	1.10686e-05	6					2.35375e-06	3	5.99554e-07	1	3.5212e-06	4	3.1885e-06	2	2.22459e-05	8	1.97772e-05	8	1.06545e-05	7	4.60935e-07
enzyme_ec	2.6.1.34	transferases transferring nitrogenous groups transaminases udp-n-acetylbacillosamine transaminase							2.34597e-06	1			1.59305e-05	7					6.49792e-06	2																									0	0	1.26597e-05	4
enzyme_ec	2.6.1.37	transferases transferring nitrogenous groups transaminases 2-aminoethylphosphonateâ€”pyruvate transaminase																			0	0											7.20873e-07	1					9.79611e-07	1	0	0
enzyme_ec	2.6.1.42	transferases transferring nitrogenous groups transaminases branched-chain-amino-acid transaminase	0.00188699	230	0.00217591	309	0.00173738	217	0.000770293	118	0.00240373	256	0.00172877	222	0.00212026	271	0.0024651	221	0.0020526	234	0.00135535	193	0.00184182	270	0.00168194	212	0.00208897	278	0.00217529	239	0.00132502	145	0.00190615	282	0.0019407	292	0.00213792	283	0.00200934	261	0.00210077	260	0.00164039	267	0.00201766	252	0.00148164	248	0.00169478
enzyme_ec	2.6.1.48	transferases transferring nitrogenous groups transaminases 5-aminovalerate transaminase	0.000113	27	2.27807e-05	16	0.000168828	40	2.78472e-05	8	1.04148e-06	1	4.32868e-05	18	1.03095e-05	6	0.000124367	30	3.83799e-05	12	0.000109217	22	3.06755e-05	14	3.9182e-05	12	5.63262e-05	24	7.36304e-05	17	0.000148506	19	4.25077e-05	15	6.61959e-05	29	3.33555e-06	3	3.94671e-05	16	4.3062e-05	17	2.63908e-05	10	8.94911e-06	6	2.93523e-05	15	7.41791e-05
enzyme_ec	2.6.1.51	transferases transferring nitrogenous groups transaminases serineâ€”pyruvate transaminase	3.19229e-06	3	9.17451e-06	4	5.66917e-06	3	2.02899e-06	1	1.60907e-06	1					3.54009e-06	3			2.41396e-05	6					3.73097e-06	3	2.51084e-06	2	9.11163e-07	1	9.99562e-07	1	4.01124e-06	4	3.65003e-06	3	2.30039e-06	1					1.96124e-06	1	1.79163e-06	1	9.12095e-07
enzyme_ec	2.6.1.52	transferases transferring nitrogenous groups transaminases phosphoserine transaminase	0.00254771	309	0.00271827	384	0.00225028	301	0.00437032	370	0.00181656	266	0.00243534	328	0.00251869	305	0.00202257	241	0.00136384	218	0.00385923	380	0.00261655	307	0.00173029	236	0.00239402	312	0.00226067	264	0.00216928	250	0.00271147	338	0.00231825	327	0.00217272	299	0.00295466	381	0.00301147	374	0.00276291	411	0.00247207	285	0.00232227	316	0.00186808
enzyme_ec	2.6.1.55	transferases transferring nitrogenous groups transaminases taurineâ€”2-oxoglutarate transaminase	3.11231e-05	8	2.14933e-06	2	3.857e-05	13	9.40146e-05	12	0.000147295	25	1.41966e-05	8			3.07091e-05	10	4.40325e-05	13	0.000300204	31	0.000147294	15	6.3721e-06	4	8.09741e-05	29	3.84111e-05	13	0.000217496	24	5.85739e-05	17	7.65336e-07	1	7.8451e-06	6	0.000132204	26	2.91535e-05	11			1.48458e-05	6	5.34287e-05	22	1.88359e-05
enzyme_ec	2.6.1.57	transferases transferring nitrogenous groups transaminases aromatic-amino-acid transaminase	1.07955e-05	7	3.21176e-05	18	1.88188e-05	7	1.27026e-05	4	2.18658e-05	9	1.60918e-05	8	3.15424e-05	13	2.93548e-06	2	8.09967e-06	5			1.77077e-05	4	1.45047e-05	5	7.3335e-06	4	2.44058e-06	3	9.18186e-06	2	1.73483e-06	2	1.08601e-05	7	1.00959e-05	6	1.48557e-05	7	1.24633e-05	7	3.51246e-06	2	9.22806e-05	16	8.93156e-06	7	6.90501e-05
enzyme_ec	2.6.1.59	transferases transferring nitrogenous groups transaminases dtdp-4-amino-4,6-dideoxygalactose transaminase	2.55513e-05	10	3.77742e-05	15	2.38953e-06	2	1.55398e-06	1	1.69377e-05	8	6.02036e-06	3	4.22623e-05	11	9.18892e-06	5	4.8798e-05	17	2.80513e-06	1	0	0	5.60332e-06	4	6.41695e-05	22	8.67738e-06	5	1.92385e-06	1	1.77775e-05	8	2.63299e-05	11	1.3365e-05	6	4.6065e-07	1	9.03356e-06	5	1.36018e-05	6	8.21776e-05	14	1.4774e-05	8	4.31787e-05
enzyme_ec	2.6.1.62	transferases transferring nitrogenous groups transaminases adenosylmethionineâ€”8-amino-7-oxononanoate transaminase	2.46737e-05	10	1.83819e-06	2					2.09329e-05	7	6.49605e-06	3	8.3494e-06	4	4.42105e-06	2	9.05742e-06	2	1.52136e-05	8	6.34771e-06	1	2.98025e-06	2	2.74066e-05	15	1.13107e-05	8	9.6124e-06	3	4.80404e-07	1	4.09537e-05	15	1.39934e-05	8	3.81397e-06	3	1.57518e-06	1	2.20191e-05	8	1.68687e-05	6	1.82942e-05	10	1.77118e-05
enzyme_ec	2.6.1.66	transferases transferring nitrogenous groups transaminases valineâ€”pyruvate transaminase	0.000140108	29	0.00020326	57	0.000107672	32	4.24837e-05	11	0.000236884	53	0.000197795	40	0.000147459	39	0.000206599	44	0.000102361	28	4.45801e-05	12	8.52514e-05	25	0.000195163	52	0.000219738	59	0.000136214	37	0.000145956	28	0.000158555	42	0.000160206	50	0.000145607	45	0.000100492	39	0.000171842	49	9.89446e-05	32	0.000135436	32	0.000210498	39	0.000127174
enzyme_ec	2.6.1.76	transferases transferring nitrogenous groups transaminases diaminobutyrateâ€”2-oxoglutarate transaminase			4.42481e-05	15	6.09643e-05	9					1.35555e-06	1	4.25238e-05	8	3.92159e-05	5	6.0929e-06	3	4.21685e-05	8	9.46172e-05	13			6.55566e-06	3			0.000194826	13	0.000112755	24			5.08831e-05	14	5.12982e-05	14	1.19155e-06	1	2.40447e-05	8			7.13388e-06	4
enzyme_ec	2.6.1.82	transferases transferring nitrogenous groups transaminases putrescineâ€”2-oxoglutarate transaminase	0.00030145	30	9.55766e-05	33	0.0003135	49	0.00034122	46	9.13346e-05	20	7.33035e-05	27	0.000162501	37	0.000250541	30	0.000108692	21	0.000441475	45	9.45417e-05	24	0.00011945	18	0.00021151	43	0.000356796	47	0.00059385	35	0.000162237	18	6.02075e-05	23	4.86029e-05	16	0.000197267	34	0.000229871	43	0.000103634	23	4.6118e-05	13	9.43787e-05	23	0.000211212
enzyme_ec	2.6.1.83	transferases transferring nitrogenous groups transaminases ll-diaminopimelate aminotransferase	0.000574597	113	0.000753993	184	0.000695006	151	0.000359823	77	0.000963668	148	0.000942221	178	0.00102999	203	0.000867993	136	0.000762279	125	0.000352725	90	0.000710158	162	0.000811285	151	0.00104356	226	0.000834416	144	0.000743178	85	0.000820818	165	0.000858153	218	0.000806527	171	0.00078462	156	0.00100969	177	0.000627	150	0.00092995	155	0.000571967	158	0.000514065
enzyme_ec	2.6.1.89	transferases transferring nitrogenous groups transaminases dtdp-3-amino-3,6-dideoxy-Î±-d-glucopyranose transaminase	3.94324e-05	11	1.23768e-05	6					1.36204e-06	1	1.71231e-05	8	2.98876e-06	3	2.8125e-06	3	0	0			3.24119e-06	3	2.12196e-05	7	8.72145e-07	1	1.87059e-05	8			1.89093e-06	2	2.52338e-05	15	6.64049e-06	5	1.82008e-05	6	1.60625e-05	8	4.99956e-06	2			4.41375e-05	16	4.64792e-06
enzyme_ec	2.6.1.9	transferases transferring nitrogenous groups transaminases histidinol-phosphate transaminase	0.000125363	61	8.53106e-05	55	6.26469e-05	41	4.18413e-05	15	8.95601e-05	43	9.65044e-05	56	0.000100748	69	0.000131314	54	0.000125681	51	2.03304e-05	14	6.60859e-05	35	5.80744e-05	38	9.55301e-05	66	9.11136e-05	44	2.9188e-05	16	0.00010193	63	0.000139161	79	0.000138571	58	5.41489e-05	34	9.05953e-05	43	3.02163e-05	30	7.42737e-05	41	6.56944e-05	45	4.86543e-05
enzyme_ec	2.6.1.90	transferases transferring nitrogenous groups transaminases dtdp-3-amino-3,6-dideoxy-Î±-d-galactopyranose transaminase							3.65888e-06	1									1.34022e-06	1	5.50587e-07	1											3.85424e-05	13			3.75111e-05	8			1.17091e-05	6
enzyme_ec	2.6.99.2	transferases transferring nitrogenous groups transferring other nitrogenous groups pyridoxine 5â€²-phosphate synthase	1.6641e-05	10	1.93854e-05	8	1.13556e-06	1	3.43578e-06	2	1.69523e-05	9	1.73524e-05	9	3.58924e-05	9	2.75548e-06	1	1.24849e-05	7	4.27452e-05	13	1.38295e-05	6	1.26039e-05	6	3.70379e-05	10	4.76126e-05	12			5.60229e-06	3	3.05872e-05	10	3.40163e-05	13	1.65082e-05	10	4.16583e-06	3	1.46937e-05	9	5.62848e-06	3	1.42093e-05	9
enzyme_ec	2.7.1.-		0.000712882	106	0.000938637	141	0.000378806	83	0.000446595	66	0.000848494	118	0.00141174	148	0.000794789	124	0.00108404	135	0.00101199	125	0.000435719	64	0.000719673	132	0.00110714	128	0.00033309	71	0.000774853	110	0.000620746	75	0.000795508	84	0.000597362	97	0.00116454	177	0.00125472	127	0.00110891	134	0.0010281	122	0.000947771	106	0.000834359	124	0.00134678
enzyme_ec	2.7.1.100	transferases transferring phosphorus-containing groups phosphotransferases with an alcohol group as acceptor s-methyl-5-thioribose kinase	1.70265e-06	1													0	0			3.44646e-06	1	3.89363e-07	1	1.49981e-06	1	2.35454e-06	1			1.05159e-06	1			8.90845e-07	1			8.18904e-07	1	1.23554e-06	2	1.11798e-06	1					0
enzyme_ec	2.7.1.107	transferases transferring phosphorus-containing groups phosphotransferases with an alcohol group as acceptor diacylglycerol kinase (atp)	2.58884e-05	14	1.83349e-05	16	1.99351e-05	16	3.70884e-05	10	3.28105e-05	20	3.14596e-05	17	2.14803e-05	17	1.11445e-05	10	6.32568e-06	5	8.58956e-06	4	1.64037e-05	8	3.10715e-05	8	2.39629e-05	16	1.97839e-05	11	4.5722e-05	16	3.41058e-05	15	1.98833e-05	16	2.79365e-05	16	3.33717e-06	3	5.70647e-05	23	1.86788e-05	15	2.44349e-05	11	3.22284e-05	17	4.19449e-05
enzyme_ec	2.7.1.11	transferases transferring phosphorus-containing groups phosphotransferases with an alcohol group as acceptor 6-phosphofructokinase	0.00282229	426	0.00279145	533	0.00214432	376	0.00162792	285	0.00322228	466	0.00282322	463	0.0029217	492	0.0027732	417	0.00230267	308	0.00182834	319	0.00251197	454	0.00253836	437	0.00276763	536	0.00281242	436	0.00245227	292	0.00294173	542	0.00301717	630	0.0029529	545	0.00270691	471	0.00317246	503	0.0024804	419	0.00252583	397	0.00284513	526	0.00213611
enzyme_ec	2.7.1.12	transferases transferring phosphorus-containing groups phosphotransferases with an alcohol group as acceptor gluconokinase	0.000551391	77	0.000516122	130	0.000163202	56	0.000378512	62	0.00125865	166	0.000411386	100	0.000651865	150	0.000550531	110	0.000456159	91	0.000193688	50	0.000400998	100	0.000404206	108	0.000500696	156	0.000725494	125	0.000185294	39	0.000720329	159	0.00105591	205	0.000890532	153	0.000487269	104	0.000741858	136	0.000567245	145	0.00109838	164	0.000473029	107	0.000473994
enzyme_ec	2.7.1.121	transferases transferring phosphorus-containing groups phosphotransferases with an alcohol group as acceptor phosphoenolpyruvateâ€”glycerone phosphotransferase	0.000768146	72	0.000499062	68	0.000541848	61	0.000515595	34	0.000427445	55	0.000664469	64	0.000300572	51	0.000291631	39	0.000676466	46	0.000999271	57	0.000621948	56	0.000543822	44	0.000768195	67	0.000522944	52	0.000772294	55	0.00101202	66	0.000812355	75	0.00036624	51	0.000881762	81	0.000810614	80	0.000695296	65	0.000196435	40	0.000483032	71	0.00050773
enzyme_ec	2.7.1.13	transferases transferring phosphorus-containing groups phosphotransferases with an alcohol group as acceptor dehydrogluconokinase					1.45873e-06	1			1.2344e-05	5	3.37547e-07	1															2.41417e-06	3					4.2711e-07	1	1.47574e-05	5											1.15103e-05
enzyme_ec	2.7.1.144	transferases transferring phosphorus-containing groups phosphotransferases with an alcohol group as acceptor tagatose-6-phosphate kinase			4.09546e-06	3	4.22179e-06	2	1.20528e-05	3	0.000145095	17	4.10587e-05	9	1.91639e-05	5	1.38847e-05	4	1.00612e-05	4			1.90015e-05	5	2.58684e-05	7	4.88877e-06	3	1.02433e-05	4	1.61391e-05	3	6.67387e-07	1	1.49021e-05	8	2.08164e-05	6	3.47524e-06	2	9.08237e-06	6	2.26307e-05	5	2.757e-05	6			9.74019e-05
enzyme_ec	2.7.1.148	transferases transferring phosphorus-containing groups phosphotransferases with an alcohol group as acceptor 4-(cytidine 5â€²-diphospho)-2-c-methyl-d-erythritol kinase	2.74202e-05	16	8.24405e-05	32	6.59446e-05	27	5.67818e-06	5	4.70286e-05	21	4.47695e-05	22	3.78926e-05	16	2.25854e-05	6	2.56813e-05	8	2.13523e-06	2	2.99625e-05	14	3.00307e-05	14	2.48505e-05	12	0.000101307	31	2.81905e-05	15	3.63735e-05	21	4.01958e-05	23	3.98247e-05	19	1.51999e-05	14	4.1699e-05	16	1.91492e-05	12	4.71118e-05	19	5.58451e-05	27	6.27495e-05
enzyme_ec	2.7.1.149	transferases transferring phosphorus-containing groups phosphotransferases with an alcohol group as acceptor 1-phosphatidylinositol-5-phosphate 4-kinase									2.27087e-07	1			1.57119e-06	2	6.4479e-07	1			1.45648e-06	2			5.35197e-07	1							2.60491e-06	3					6.53506e-07	1					1.54976e-06	2	3.4949e-07	1
enzyme_ec	2.7.1.15	transferases transferring phosphorus-containing groups phosphotransferases with an alcohol group as acceptor ribokinase	7.0474e-05	18	4.87715e-05	28	1.99367e-05	9	2.13166e-05	6	4.75134e-05	21	4.2264e-05	13	1.84505e-05	12	6.68347e-05	19	7.95186e-05	16	6.96669e-05	20	3.94596e-05	14	3.67226e-05	12	0.000110207	32	0.000102213	21	1.85591e-05	7	9.69358e-05	28	2.73524e-05	17	4.72921e-05	23	3.10686e-05	13	0.000103598	24	0.000124642	14	6.05653e-05	15	2.10968e-05	9	5.46821e-05
enzyme_ec	2.7.1.156	transferases transferring phosphorus-containing groups phosphotransferases with an alcohol group as acceptor adenosylcobinamide kinase	1.43912e-05	4	7.38492e-07	1			0	0	6.35224e-06	1	7.22379e-06	2	5.7993e-07	1	0	0	2.9731e-05	3	1.00506e-06	1	3.37368e-06	1			8.62123e-05	9	2.11611e-06	1			7.55073e-06	4	5.90398e-07	1			6.74687e-07	1	3.5875e-06	1	7.39738e-05	7	0	0			2.75943e-06
enzyme_ec	2.7.1.16	transferases transferring phosphorus-containing groups phosphotransferases with an alcohol group as acceptor ribulokinase	0.000212934	57	8.39536e-05	45	7.85434e-05	35	6.82707e-05	23	7.99806e-05	26	9.53079e-05	43	8.538e-05	35	8.17519e-05	27	0.000116505	34	0.000202104	38	0.000150082	45	8.61096e-05	35	0.00016382	61	5.95934e-05	27	5.8031e-05	23	0.000197813	60	9.17157e-05	41	0.000299816	61	0.000254956	56	9.7324e-05	44	0.000227929	73	7.02653e-05	26	0.000120016	45	0.000125313
enzyme_ec	2.7.1.162	transferases transferring phosphorus-containing groups phosphotransferases with an alcohol group as acceptor n-acetylhexosamine 1-kinase	7.63131e-07	1	2.18828e-06	2			6.0639e-06	4	1.79018e-05	5			1.28271e-05	4	1.64099e-05	3	3.42216e-05	6	2.31023e-05	7	1.34219e-05	4	1.32843e-06	1	9.39664e-06	3	3.18001e-05	6	7.72265e-06	1	2.24396e-05	7	4.39057e-06	3	1.57697e-05	6	1.56248e-05	5	1.50584e-06	1	1.72213e-05	5	1.90659e-05	5			1.20116e-06
enzyme_ec	2.7.1.165	transferases transferring phosphorus-containing groups phosphotransferases with an alcohol group as acceptor glycerate 2-kinase	2.52526e-06	2	3.52349e-05	12	4.4709e-06	3			7.25919e-06	8	5.50047e-06	2	2.2457e-06	2	6.21822e-06	4	1.21238e-05	5	0	0	3.34101e-06	3	3.03206e-06	2	3.74039e-05	13	2.82593e-06	1	1.4662e-06	2	1.18352e-05	9	1.15426e-05	7	1.80052e-06	2	3.7959e-06	3	2.26975e-06	3	8.97415e-07	1	1.55294e-06	2	5.15426e-06	4	7.34986e-06
enzyme_ec	2.7.1.166	transferases transferring phosphorus-containing groups phosphotransferases with an alcohol group as acceptor 3-deoxy-d-manno-octulosonic acid kinase			6.85368e-07	1			2.07333e-06	2	1.26047e-05	8	7.56461e-06	4	1.41385e-05	8	5.84171e-05	13	7.45049e-05	14	4.0494e-06	3	2.56147e-05	13	1.3437e-06	2	3.60384e-05	14	2.39231e-05	11	0	0	5.23253e-05	18	4.88276e-06	4	8.44369e-06	7	6.34243e-06	6	1.03962e-05	8	2.00925e-05	10	1.29755e-05	7			6.94944e-05
enzyme_ec	2.7.1.167	transferases transferring phosphorus-containing groups phosphotransferases with an alcohol group as acceptor d-glycero-Î²-d-manno-heptose-7-phosphate kinase	1.65663e-05	4	8.88161e-07	1					0	0	1.75216e-05	8	1.06612e-05	6	1.08625e-06	1					0	0	1.38105e-06	1									7.74059e-06	6	1.32245e-05	8	4.16257e-06	3							2.49073e-06	2	9.85395e-06
enzyme_ec	2.7.1.168	transferases transferring phosphorus-containing groups phosphotransferases with an alcohol group as acceptor d-glycero-Î±-d-manno-heptose-7-phosphate kinase	5.7472e-07	1	5.43934e-06	3	5.61321e-06	3	3.04524e-05	6	2.8758e-05	8			7.52265e-07	1	4.88191e-05	9	3.32458e-06	2			1.54687e-05	6	6.0832e-06	3	5.38099e-06	2	2.0543e-06	1	3.03928e-06	1	2.35151e-06	1	1.98418e-06	2					8.92079e-06	3	1.05701e-06	2	3.14591e-05	7			2.50749e-05
enzyme_ec	2.7.1.17	transferases transferring phosphorus-containing groups phosphotransferases with an alcohol group as acceptor xylulokinase	0.000218055	48	0.000207767	38	0.000238545	41	5.9779e-05	19	0.000155234	39	0.000301215	70	0.000291859	56	0.000279637	48	0.000212779	51	4.64788e-05	23	0.000143202	44	0.000178449	57	0.000542873	73	0.0003175	55	3.20257e-05	10	0.000254757	73	0.000259014	89	8.81376e-05	44	0.000255998	71	0.000106538	37	0.000206298	67	0.00019061	49	8.71474e-05	31	0.000298822
enzyme_ec	2.7.1.170	transferases transferring phosphorus-containing groups phosphotransferases with an alcohol group as acceptor anhydro-n-acetylmuramic acid kinase	1.90608e-06	1			0	0					2.06443e-06	1	6.12328e-06	3					0	0	8.60134e-07	1			4.10434e-07	1									7.62199e-07	1	5.31366e-07	1
enzyme_ec	2.7.1.178	transferases transferring phosphorus-containing groups phosphotransferases with an alcohol group as acceptor 2-dehydro-3-deoxyglucono/galactono-kinase											1.75229e-06	1									3.51271e-05	7	3.64338e-07	1			9.14597e-06	2	0	0					1.90541e-06	1	6.8384e-06	3	8.93366e-06	3	1.02172e-05	4	3.95691e-06	2	1.40112e-06	1	3.25656e-07
enzyme_ec	2.7.1.180	transferases transferring phosphorus-containing groups phosphotransferases with an alcohol group as acceptor fad:protein fmn transferase	6.18241e-07	1	1.40372e-06	2	0	0			1.6519e-05	3	1.07729e-06	1	2.78106e-06	2							1.2069e-06	1	7.6708e-06	2	6.15104e-07	1	1.42364e-06	2	5.91318e-07	1	7.50887e-06	2	2.12028e-06	4	0	0	2.8933e-06	2			4.17932e-07	1	4.0199e-06	1	2.11689e-06	2
enzyme_ec	2.7.1.184	transferases transferring phosphorus-containing groups phosphotransferases with an alcohol group as acceptor sulfofructose kinase			1.31708e-05	4			1.58259e-06	1			2.08696e-06	2	7.70075e-06	5			6.47279e-05	14	3.32037e-06	2	1.67684e-06	2									1.58113e-06	1	7.71188e-07	1					3.95535e-06	1	7.61268e-07	1	9.52447e-07	1
enzyme_ec	2.7.1.189	transferases transferring phosphorus-containing groups phosphotransferases with an alcohol group as acceptor autoinducer-2 kinase	1.371e-06	1	1.12704e-06	1	1.90553e-06	1							1.86278e-06	2	0	0			2.49223e-06	2	0	0			1.95942e-06	1													1.50818e-06	1			4.06269e-06	4			4.54848e-06
enzyme_ec	2.7.1.190	transferases transferring phosphorus-containing groups phosphotransferases with an alcohol group as acceptor aminoglycoside 2â€²â€²-phosphotransferase
enzyme_ec	2.7.1.191	transferases transferring phosphorus-containing groups phosphotransferases with an alcohol group as acceptor protein-nÏ€-phosphohistidineâ€”d-mannose phosphotransferase	0.000676316	61	0.000649038	94	0.00123778	100	0.000846236	72	0.00148015	134	0.00142197	127	0.000558848	84	0.000965683	82	0.000913336	102	0.000524833	60	0.000631151	83	0.00136489	110	0.000209832	38	0.00134765	105	0.00184368	98	0.000362879	45	0.000756393	117	0.000844838	116	0.000393412	61	0.00122136	99	0.000903236	81	0.000439271	65	0.000445789	87	0.00150966
enzyme_ec	2.7.1.192	transferases transferring phosphorus-containing groups phosphotransferases with an alcohol group as acceptor protein-nÏ€-phosphohistidineâ€”n-acetylmuramate phosphotransferase	1.92109e-06	2	2.52501e-05	7	1.8913e-05	5	7.903e-06	1	3.78906e-06	3	4.01594e-05	6	6.14117e-06	1	9.02635e-05	10	4.92317e-05	5	2.85252e-06	1	6.65071e-06	2	6.28e-06	1	1.97634e-05	7	2.75544e-05	5	2.32446e-05	5	1.36838e-05	3	1.20385e-06	1	2.06727e-05	5	4.0273e-06	2	3.32757e-05	5	2.5692e-05	6	5.62833e-06	2	8.80559e-06	2	1.6673e-06
enzyme_ec	2.7.1.193	transferases transferring phosphorus-containing groups phosphotransferases with an alcohol group as acceptor protein-nÏ€-phosphohistidineâ€”n-acetyl-d-glucosamine phosphotransferase	0.000115824	17	5.84616e-05	20	4.15511e-05	14	2.84261e-05	7	3.16888e-05	11	4.76716e-05	10	0.000103146	22	0.000166844	26	0.00012714	16	1.08224e-05	4	3.35311e-05	9	2.20779e-05	6	3.88683e-05	12	6.36192e-05	16	0.000125721	20	3.83601e-05	12	2.0648e-05	10	4.93577e-05	16	1.58972e-05	7	4.64166e-05	13	4.99111e-05	17	6.25502e-05	14	1.9648e-05	8	2.54847e-05
enzyme_ec	2.7.1.194	transferases transferring phosphorus-containing groups phosphotransferases with an alcohol group as acceptor protein-nÏ€-phosphohistidineâ€”l-ascorbate phosphotransferase	1.18179e-05	4	1.71626e-05	8	1.82865e-05	9	2.70899e-06	1	2.53185e-06	2	1.54265e-05	7	9.91695e-06	4	5.27704e-06	4	1.66774e-05	4	1.51194e-05	6	4.73931e-06	1	3.66738e-05	9	7.78308e-06	6	1.51942e-05	10	6.12966e-06	3	2.99181e-06	4	2.82921e-06	3	1.37929e-05	8	1.2847e-05	7	1.36221e-06	1	2.41537e-05	8	1.16487e-05	4	8.86221e-06	6	1.358e-05
enzyme_ec	2.7.1.195	transferases transferring phosphorus-containing groups phosphotransferases with an alcohol group as acceptor protein-nÏ€-phosphohistidineâ€”2-o-Î±-mannosyl-d-glycerate phosphotransferase	5.22681e-06	3	1.22421e-05	8	2.1148e-05	4	9.49179e-06	3	0	0	1.90129e-05	3	1.52594e-05	5	1.90234e-05	4	3.53653e-06	2	3.09116e-06	1	1.35796e-05	7	1.29185e-06	1	4.91198e-06	4	2.3926e-05	7	3.05275e-05	3	6.11102e-06	3	9.02923e-06	7	1.78099e-06	2	1.03104e-05	1	3.14913e-05	14	1.16691e-05	3	3.93495e-07	1	5.65804e-05	9
enzyme_ec	2.7.1.196	transferases transferring phosphorus-containing groups phosphotransferases with an alcohol group as acceptor protein-nÏ€-phosphohistidineâ€”n,nâ€²-diacetylchitobiose phosphotransferase	0.00045858	33	0.000344541	34	0.000216862	25	0.00010855	16	0.000403184	32	0.000576236	53	0.000405888	42	8.7213e-05	16	0.000264867	17	6.06197e-05	10	0.000105609	16	0.000495838	31	6.14781e-06	2	0.000302993	37	2.32882e-05	5	2.17676e-05	5	0.000266664	27	0.000466184	54	2.49351e-05	6	0.0001577	21	0.000125474	15	0.000187219	25	0.000369521	23	0.000226467
enzyme_ec	2.7.1.198	transferases transferring phosphorus-containing groups phosphotransferases with an alcohol group as acceptor protein-nÏ€-phosphohistidineâ€”d-sorbitol phosphotransferase	2.52449e-05	6	2.52916e-05	9	0.000123193	16	9.05574e-05	8	1.459e-05	4	0.000200406	20	5.01952e-05	10	2.26547e-05	7	3.83903e-05	6	1.88219e-05	5	1.72098e-05	6	3.08912e-05	11	1.23976e-05	5	5.82327e-05	15	8.5986e-05	14	3.39081e-05	12	4.26833e-05	12	8.01885e-07	1	0.000107206	19	5.022e-05	9	3.60861e-05	6	2.41349e-05	6	5.14936e-05	10	4.0575e-05
enzyme_ec	2.7.1.2	transferases transferring phosphorus-containing groups phosphotransferases with an alcohol group as acceptor glucokinase	0.00151291	209	0.001329	245	0.000954034	185	0.000489478	108	0.0015297	245	0.00129417	203	0.00156832	269	0.00102563	207	0.00120309	171	0.000504697	128	0.00117458	212	0.00114283	217	0.00113168	202	0.00134514	196	0.00107197	166	0.00100299	214	0.00147911	273	0.0011846	252	0.00121416	225	0.00104566	229	0.000995966	209	0.00110984	206	0.00133199	241	0.000810801
enzyme_ec	2.7.1.202	transferases transferring phosphorus-containing groups phosphotransferases with an alcohol group as acceptor protein-nÏ€-phosphohistidineâ€”d-fructose phosphotransferase	0.000119557	27	7.71156e-05	34	5.09647e-05	17	0.000142833	17	2.73665e-05	9	0.000111097	23	7.04152e-05	23	0.000113166	30	3.3422e-05	16	3.10742e-05	13	3.30709e-05	15	1.31784e-05	4	4.08799e-05	19	0.000151359	37	0.000608438	47	2.10866e-05	16	8.38993e-05	37	1.55679e-05	9	4.95201e-05	8	0.000154491	38	9.78402e-05	19	7.47789e-05	22	0.000152833	39	6.6175e-05
enzyme_ec	2.7.1.203	transferases transferring phosphorus-containing groups phosphotransferases with an alcohol group as acceptor protein-nÏ€-phosphohistidineâ€”d-glucosaminate phosphotransferase	0.000300563	20	2.85981e-05	9	0.000164795	14	7.33427e-05	7	0.000203796	17	0.000300353	31	0.000105087	17	0.000147928	10	9.81563e-05	15	0.000432652	17	0.000151328	17	0.000674714	17	4.77145e-05	10	0.000208548	18	0.000300717	20	0.000119772	13	0.000126007	16	5.64304e-05	14	0.000347158	20	0.000126799	13	0.00015873	14	0.00011003	11	0.000331595	23	9.79171e-05
enzyme_ec	2.7.1.205	transferases transferring phosphorus-containing groups phosphotransferases with an alcohol group as acceptor protein-nÏ€-phosphohistidineâ€”cellobiose phosphotransferase	0.00045858	33	0.000344541	34	0.000216862	25	0.00010855	16	0.000403184	32	0.000576236	53	0.000405888	42	8.7213e-05	16	0.000264867	17	6.06197e-05	10	0.000105609	16	0.000495838	31	6.14781e-06	2	0.000302993	37	2.32882e-05	5	2.17676e-05	5	0.000266664	27	0.000466184	54	2.49351e-05	6	0.0001577	21	0.000125474	15	0.000187219	25	0.000369521	23	0.000226716
enzyme_ec	2.7.1.207	transferases transferring phosphorus-containing groups phosphotransferases with an alcohol group as acceptor protein-nÏ€-phosphohistidineâ€”lactose phosphotransferase					3.69331e-06	1			1.51607e-05	4	2.17142e-06	1																							3.04926e-06	1	1.32533e-06	1					3.6502e-06	2			6.63081e-06
enzyme_ec	2.7.1.208	transferases transferring phosphorus-containing groups phosphotransferases with an alcohol group as acceptor protein-nÏ€-phosphohistidineâ€”maltose phosphotransferase	0	0			2.61167e-05	7					5.95044e-06	2	2.24714e-06	1	1.18982e-05	3	3.05645e-05	4			1.52324e-05	2	1.70349e-05	4	1.80779e-05	3	9.88246e-06	1	2.0986e-05	2			2.34933e-05	3	3.38043e-05	5	4.12352e-06	1	1.31329e-05	2	9.62622e-06	2	4.6176e-06	1	4.44608e-05	4	2.00855e-06
enzyme_ec	2.7.1.21	transferases transferring phosphorus-containing groups phosphotransferases with an alcohol group as acceptor thymidine kinase	1.78532e-06	2	2.94061e-06	3	1.00757e-06	2			4.69522e-06	3	9.45463e-07	1	2.67593e-06	2			0	0	4.63404e-07	1	2.13651e-06	1			7.16114e-06	4	1.17487e-06	1	0	0	2.96182e-06	3	6.07795e-06	3	2.48561e-06	2	3.89255e-06	3	3.81061e-06	2	1.00172e-05	7			1.12621e-06	1	2.9116e-06
enzyme_ec	2.7.1.211	transferases transferring phosphorus-containing groups phosphotransferases with an alcohol group as acceptor protein-nÏ€-phosphohistidineâ€”sucrose phosphotransferase	2.06607e-06	2			2.67713e-06	3	4.19147e-06	1	6.60517e-07	1					0	0											2.50259e-06	2	1.82577e-05	7					0	0	6.49145e-06	3	7.07401e-07	1
enzyme_ec	2.7.1.213	transferases transferring phosphorus-containing groups phosphotransferases with an alcohol group as acceptor cytidine kinase			3.38232e-06	4	1.15916e-06	1	3.74511e-07	1			1.93608e-06	2					1.22388e-06	1	1.3976e-05	5	1.48212e-06	2			4.39607e-06	3	1.06669e-05	6	1.61132e-06	1			3.77797e-05	12	3.6654e-06	3	3.1241e-07	1	2.06342e-06	2	9.9805e-06	5					2.79376e-06
enzyme_ec	2.7.1.218	transferases transferring phosphorus-containing groups phosphotransferases with an alcohol group as acceptor fructoselysine 6-kinase	6.59535e-05	12	8.58887e-05	31	1.46337e-05	9	2.72403e-05	7	6.50073e-05	24	0.000129764	28	5.21932e-05	16	0.000107086	29	4.55227e-05	15	2.22007e-06	2	2.72657e-05	10	1.18559e-05	6	2.16543e-05	9	6.8745e-05	18	4.35679e-05	9	0.000149309	28	4.11199e-05	17	0.000106354	25	2.23479e-05	8	5.74862e-05	17	8.52125e-05	19	6.52991e-05	21	6.11281e-05	20	0.000138286
enzyme_ec	2.7.1.219	transferases transferring phosphorus-containing groups phosphotransferases with an alcohol group as acceptor d-threonate 4-kinase	4.26931e-06	4	5.81281e-06	6	2.964e-06	3			9.14012e-06	6	2.78671e-06	2	4.41823e-06	3	2.02429e-06	2	9.49422e-06	6	3.88437e-06	2	4.95067e-07	1	3.85322e-06	3			1.73927e-06	2			1.01005e-05	8	1.02076e-05	8	2.59219e-05	12	4.48973e-07	1			4.06627e-06	3	9.45768e-06	6	3.58208e-06	4	2.44104e-05
enzyme_ec	2.7.1.220	transferases transferring phosphorus-containing groups phosphotransferases with an alcohol group as acceptor d-erythronate 4-kinase	4.26931e-06	4	5.81281e-06	6	2.964e-06	3			9.14012e-06	6	2.78671e-06	2	4.41823e-06	3	2.02429e-06	2	9.49422e-06	6	3.88437e-06	2	4.95067e-07	1	3.85322e-06	3			1.73927e-06	2			1.01005e-05	8	1.02076e-05	8	2.59219e-05	12	4.48973e-07	1			4.06627e-06	3	9.45768e-06	6	3.58208e-06	4	2.44104e-05
enzyme_ec	2.7.1.221	transferases transferring phosphorus-containing groups phosphotransferases with an alcohol group as acceptor n-acetylmuramate 1-kinase	6.72255e-06	4	1.67109e-05	9	1.412e-05	4	1.7059e-06	2	2.07843e-06	1	1.22922e-05	5	8.98659e-06	6	1.19423e-06	2					2.53417e-06	2	5.97654e-07	1	3.54944e-05	15					2.24212e-05	1	1.51638e-05	7			3.80305e-06	2			1.02915e-06	1	1.42285e-06	2	3.18473e-06	2	1.18459e-06
enzyme_ec	2.7.1.223	transferases transferring phosphorus-containing groups phosphotransferases with an alcohol group as acceptor aminoimidazole riboside kinase	8.45279e-07	1	3.04941e-05	10	8.61885e-06	6	1.16677e-06	1	2.47696e-06	2	5.70973e-06	4	9.40629e-06	3									1.21739e-06	2	5.06335e-06	3	1.04524e-05	2	2.76577e-06	2	1.33699e-06	2	5.45224e-06	4	5.24887e-07	1	6.48957e-06	3	3.4677e-06	4			2.46959e-06	2	1.43051e-06	1	1.70267e-05
enzyme_ec	2.7.1.23	transferases transferring phosphorus-containing groups phosphotransferases with an alcohol group as acceptor nad+ kinase	1.30177e-06	1	4.52721e-06	3	5.47941e-06	2	0	0	1.90876e-06	4	1.03928e-06	2	2.71316e-06	3	1.48113e-05	3	3.47921e-06	3	1.22932e-06	1			2.15513e-05	3	7.84545e-06	6			9.88625e-06	4	1.0726e-06	1	7.1189e-06	3	1.75373e-06	3			2.39097e-06	2	1.01594e-06	1	3.37785e-06	2	1.49572e-06	2	4.54015e-06
enzyme_ec	2.7.1.24	transferases transferring phosphorus-containing groups phosphotransferases with an alcohol group as acceptor dephospho-coa kinase	1.59056e-05	7	6.58574e-06	6	7.88397e-07	1	3.80342e-05	12	9.18217e-06	7	2.12961e-06	2	0.000294253	11	0.000232262	4	0.00158381	3	4.5079e-05	13	4.25474e-06	3			0	0	3.82429e-06	2	4.61867e-06	3	9.91265e-06	9	4.39345e-06	5	1.2988e-05	11	3.18438e-05	10	7.57568e-06	7	1.55169e-05	8	8.16416e-06	5	6.27372e-06	4	1.1881e-05
enzyme_ec	2.7.1.25	transferases transferring phosphorus-containing groups phosphotransferases with an alcohol group as acceptor adenylyl-sulfate kinase	1.94928e-05	8	9.34599e-06	8	0	0	0.000463951	26	9.24264e-06	7	3.40115e-05	14	2.68109e-05	10	1.76059e-06	2	1.61082e-05	9	2.31796e-06	2	0	0	1.76637e-05	8	5.44472e-06	4	1.66432e-05	11	0.000318611	23	1.64601e-05	13	2.54083e-05	20	2.32683e-06	2	1.13748e-05	7	3.93904e-06	3	9.44041e-06	7	9.07745e-07	1	5.89387e-06	5	1.78774e-06
enzyme_ec	2.7.1.26	transferases transferring phosphorus-containing groups phosphotransferases with an alcohol group as acceptor riboflavin kinase	1.6809e-06	1	2.67041e-06	3	3.59407e-07	1			2.52333e-05	5	2.07482e-06	2	7.45943e-07	1	7.62721e-06	6	4.51302e-06	3							4.9616e-06	5	3.17859e-06	2			3.34973e-06	4	5.61263e-07	1			8.70944e-07	1	6.59118e-07	1	2.85141e-06	2			7.50626e-06	3	1.95909e-05
enzyme_ec	2.7.1.30	transferases transferring phosphorus-containing groups phosphotransferases with an alcohol group as acceptor glycerol kinase	0.00116251	100	0.00154176	126	0.00206962	115	0.00168304	92	0.00114949	104	0.00147988	112	0.000748083	100	0.00145045	125	0.00117741	86	0.00172749	114	0.00364945	150	0.00249107	108	0.00301648	148	0.00165177	111	0.00244793	121	0.00344905	135	0.0038439	167	0.000819047	104	0.00259569	146	0.00294085	154	0.00196799	138	0.00145179	112	0.0019794	145	0.0015226
enzyme_ec	2.7.1.32	transferases transferring phosphorus-containing groups phosphotransferases with an alcohol group as acceptor choline kinase	1.27801e-06	1	3.04496e-06	2	3.20535e-06	1					1.72679e-05	6			1.6302e-06	2	1.19394e-06	1			1.78008e-05	7	1.87711e-05	8	3.47454e-06	3					8.84794e-06	6			6.38561e-07	1			6.11056e-06	4			2.07605e-06	1	3.15513e-06	2	3.94149e-05
enzyme_ec	2.7.1.33	transferases transferring phosphorus-containing groups phosphotransferases with an alcohol group as acceptor pantothenate kinase	4.07732e-05	13	2.52195e-05	14	3.14974e-05	13	8.86534e-07	1	2.04813e-05	11	2.25542e-05	12	3.72544e-05	17	3.2991e-05	14	8.31953e-06	6	1.24703e-05	8	1.23077e-05	8	1.95444e-05	12	2.45095e-05	16	3.03586e-05	12	1.76762e-05	9	2.97089e-05	16	4.283e-05	27	4.54406e-05	18	6.1381e-06	5	2.90739e-05	14	1.09731e-05	8	3.69184e-05	12	2.59457e-05	15	4.11311e-05
enzyme_ec	2.7.1.35	transferases transferring phosphorus-containing groups phosphotransferases with an alcohol group as acceptor pyridoxal kinase	4.70676e-06	3	1.21506e-06	2	4.55791e-06	3	2.78876e-06	2	1.22969e-05	7	3.35625e-06	3	1.39539e-06	1	1.5719e-05	7	1.61971e-05	9	2.65484e-06	2	8.46625e-06	6			1.82657e-06	3	6.8673e-06	7	1.2738e-05	4	2.70758e-05	12	6.99747e-06	7	4.19869e-06	2	7.23176e-06	6	9.61219e-06	7	1.68987e-05	8	1.37026e-05	6	1.13235e-05	9	1.58977e-05
enzyme_ec	2.7.1.39	transferases transferring phosphorus-containing groups phosphotransferases with an alcohol group as acceptor homoserine kinase	7.28956e-05	15	4.05572e-05	10	3.69668e-05	7	2.79479e-05	4	0.000125997	19	6.5402e-05	18	6.33417e-05	14	0.000136295	25	5.31495e-05	14	6.34052e-06	2	6.04333e-05	10	7.28614e-05	9	6.25772e-05	20	6.56096e-05	12	5.19512e-06	3	6.64165e-05	17	8.45866e-05	22	8.97442e-05	19	5.02135e-05	14	8.86512e-05	17	4.63443e-05	9	9.10852e-05	17	8.08884e-05	20	7.30563e-05
enzyme_ec	2.7.1.4	transferases transferring phosphorus-containing groups phosphotransferases with an alcohol group as acceptor fructokinase	0.000316159	63	0.000500962	108	0.000289891	54	0.000138082	37	0.000616217	98	0.000471944	93	0.000545421	116	0.000478564	70	0.000428066	73	0.000127851	35	0.000218939	55	0.000388795	94	0.000229608	62	0.000442729	92	0.000291422	48	0.000367039	83	0.000361086	96	0.000477596	110	0.000531917	101	0.000373164	89	0.000377641	81	0.000337732	70	0.000435542	87	0.000374514
enzyme_ec	2.7.1.40	transferases transferring phosphorus-containing groups phosphotransferases with an alcohol group as acceptor pyruvate kinase	0.00130325	252	0.00119161	340	0.00209968	319	0.000823311	146	0.00324108	366	0.0020698	380	0.00167167	319	0.00241545	325	0.00247633	269	0.000825863	154	0.00199576	350	0.00173666	305	0.0019049	354	0.0030334	370	0.00159601	191	0.00193561	331	0.0016416	391	0.00249028	441	0.00145209	330	0.00170861	352	0.00162075	247	0.00160869	294	0.00136286	367	0.00381606
enzyme_ec	2.7.1.45	transferases transferring phosphorus-containing groups phosphotransferases with an alcohol group as acceptor 2-dehydro-3-deoxygluconokinase	0.00146031	131	0.0017724	174	0.00149775	148	0.00104324	121	0.00107667	124	0.00139683	153	0.00186705	150	0.00128379	113	0.00169741	140	0.00190659	126	0.00165271	178	0.00215577	180	0.0023193	216	0.0016492	167	0.00091865	95	0.0016827	170	0.00171646	215	0.00143022	172	0.00212859	168	0.00127944	129	0.00165974	177	0.0015877	168	0.00194897	227	0.0010314
enzyme_ec	2.7.1.48	transferases transferring phosphorus-containing groups phosphotransferases with an alcohol group as acceptor uridine/cytidine kinase	0.00014072	56	0.000119831	58	0.000103352	33	2.8435e-05	13	0.000101989	47	6.34701e-05	23	0.000135307	49	0.000129889	41	8.06831e-05	22	2.26107e-05	8	6.9846e-05	30	5.79764e-05	26	0.00011356	42	0.000104707	35	2.58129e-05	12	6.81247e-05	37	0.000143885	76	6.15278e-05	26	8.41181e-05	34	0.00010432	51	4.87738e-05	26	8.61097e-05	34	9.86843e-05	46	0.000112682
enzyme_ec	2.7.1.49	transferases transferring phosphorus-containing groups phosphotransferases with an alcohol group as acceptor hydroxymethylpyrimidine kinase	8.44233e-05	30	2.23968e-05	19	2.27062e-05	12	6.15832e-06	3	8.44085e-05	36	1.59832e-05	7	2.82028e-05	20	0.000136081	38	4.73775e-05	15	1.02332e-05	6	2.50426e-05	12	8.61888e-05	30	3.24465e-05	14	8.3526e-05	31	9.27675e-06	7	1.36193e-05	12	3.6498e-05	20	4.22759e-05	23	3.43316e-05	15	8.48862e-05	43	6.60738e-05	22	6.90832e-05	24	3.24526e-05	15	0.000121912
enzyme_ec	2.7.1.5	transferases transferring phosphorus-containing groups phosphotransferases with an alcohol group as acceptor rhamnulokinase	0.000443082	66	0.000377617	69	0.000180258	41	0.000108323	29	0.000249977	55	0.000269639	60	0.000264905	51	0.000128032	29	0.000164054	39	8.17077e-05	28	0.000130997	37	0.000205277	48	0.000265496	70	0.000175557	43	0.000142321	23	0.000356159	67	0.000404869	69	0.000193292	52	0.000162575	34	0.000251745	54	0.000200338	55	0.00012819	40	0.000231438	45	0.000159405
enzyme_ec	2.7.1.50	transferases transferring phosphorus-containing groups phosphotransferases with an alcohol group as acceptor hydroxyethylthiazole kinase	0.000295976	33	6.87701e-06	6	0	0	0.000114669	13	0.000185299	34	2.47096e-06	2	5.67652e-05	18	0.000123209	19	0.000117305	24	0.000338898	41	3.10623e-05	6	1.82209e-05	7	3.95227e-05	14	8.83314e-05	18	1.6225e-05	6	7.60279e-05	21	6.0194e-05	20	7.14445e-05	28	4.83737e-05	9	0.000108232	26	6.65712e-05	18	0.000113627	20	5.58291e-05	15	8.03235e-05
enzyme_ec	2.7.1.51	transferases transferring phosphorus-containing groups phosphotransferases with an alcohol group as acceptor l-fuculokinase													5.06087e-07	1
enzyme_ec	2.7.1.52	transferases transferring phosphorus-containing groups phosphotransferases with an alcohol group as acceptor fucokinase	6.1707e-05	16			1.08346e-05	6			1.63776e-06	2			4.18987e-07	1	4.16928e-06	4	1.30091e-06	1					6.52349e-07	1	2.05714e-06	2			7.79798e-06	5	6.20286e-06	3	8.37752e-06	5			3.34625e-06	3							2.27262e-06	4	9.13668e-07
enzyme_ec	2.7.1.56	transferases transferring phosphorus-containing groups phosphotransferases with an alcohol group as acceptor 1-phosphofructokinase	5.32756e-05	18	5.16612e-05	28	2.92669e-05	12	5.21106e-05	15	0.000101187	37	0.000100653	30	7.76362e-05	25	8.29794e-05	27	3.01191e-05	15	2.42398e-05	10	1.47549e-05	9	8.54681e-05	26	1.80364e-05	11	6.30813e-05	22	0.000302287	25	7.08484e-05	31	3.41366e-05	19	8.04167e-05	30	5.68188e-05	25	0.000150827	36	8.78374e-05	29	5.94745e-05	22	7.36658e-05	35	7.7688e-05
enzyme_ec	2.7.1.58	transferases transferring phosphorus-containing groups phosphotransferases with an alcohol group as acceptor 2-dehydro-3-deoxygalactonokinase	7.44081e-06	5	3.41862e-06	3					1.01475e-05	3	5.22196e-06	3	1.36676e-05	7	5.37274e-06	4											5.81401e-06	3					3.54432e-06	4	3.43029e-06	3			6.10086e-06	4			1.23109e-06	1			3.335e-05
enzyme_ec	2.7.1.6	transferases transferring phosphorus-containing groups phosphotransferases with an alcohol group as acceptor galactokinase	0.00175332	198	0.00142231	221	0.00137471	172	0.000772354	116	0.00130253	220	0.00139428	184	0.00184014	210	0.00108274	174	0.00167351	186	0.00103433	138	0.0013038	195	0.00146765	200	0.00111501	183	0.0015048	193	0.000585962	111	0.00103939	193	0.00147987	243	0.00127697	196	0.00144034	189	0.00114908	227	0.00118424	186	0.00138191	162	0.00135908	190	0.0018248
enzyme_ec	2.7.1.63	transferases transferring phosphorus-containing groups phosphotransferases with an alcohol group as acceptor polyphosphateâ€”glucose phosphotransferase					1.10293e-05	2	6.00455e-06	2	1.20068e-05	3	8.60106e-06	3	1.05628e-05	3	0.000167188	11	0.000108633	11	7.34726e-06	3	4.05534e-05	7	1.10601e-05	2	0.000109213	11	6.67139e-05	7	1.28333e-06	1	5.55665e-05	11	2.97932e-05	8	1.67424e-05	6	1.17126e-05	3	2.72176e-05	7	5.03203e-05	10	1.29817e-05	3			0.000161529
enzyme_ec	2.7.1.68	transferases transferring phosphorus-containing groups phosphotransferases with an alcohol group as acceptor 1-phosphatidylinositol-4-phosphate 5-kinase			2.94006e-06	1	7.69102e-07	1							1.11387e-06	2	4.59043e-07	1			6.56078e-07	1							5.48635e-07	1									1.3745e-06	1					1.35917e-06	2
enzyme_ec	2.7.1.69	Transferred to 2.7.1.191 and 2.7.1.192 and 2.7.1.193 and 2.7.1.194 and 2.7.1.195 and 2.7.1.196 and 2.7.1.197 and 2.7.1.198 and 2.7.1.199 and 2.7.1.200 and 2.7.1.201 and 2.7.1.202 and 2.7.1.203 and 2.7.1.204 and 2.7.1.205 and 2.7.1.206 and 2.7.1.207 and 2.7.1.208	9.89925e-06	4	5.46166e-05	14	6.43972e-05	12	7.903e-06	1	1.75385e-05	7	6.2122e-05	12	7.83598e-06	2	0.000106781	13	0.000108813	12	2.85252e-06	1	1.11757e-05	6	6.28e-06	1	2.63034e-05	10	3.65449e-05	7	3.96016e-05	9	1.86915e-05	5	5.21608e-06	4	2.32237e-05	8	9.67782e-06	4	4.47414e-05	10	7.8432e-05	10	7.01863e-06	3	1.49211e-05	5	1.15061e-05
enzyme_ec	2.7.1.71	transferases transferring phosphorus-containing groups phosphotransferases with an alcohol group as acceptor shikimate kinase	0.000129007	47	0.000154574	64	6.47872e-05	30	3.57129e-05	15	0.000178447	67	0.000165443	49	0.000126052	54	9.90029e-05	44	8.64039e-05	35	2.56265e-05	14	2.58515e-05	18	0.000206247	30	7.04177e-05	37	0.000116438	48	3.47621e-05	18	8.76158e-05	50	0.000125583	51	9.4239e-05	39	5.01807e-05	23	0.000114803	54	5.98255e-05	30	7.46326e-05	29	0.000162064	50	0.000121702
enzyme_ec	2.7.1.8	transferases transferring phosphorus-containing groups phosphotransferases with an alcohol group as acceptor glucosamine kinase	1.04024e-05	5	1.56381e-05	6	7.95146e-07	2	1.45306e-05	5	2.78784e-06	3	1.53306e-05	7	1.43519e-05	7	4.17332e-06	2	3.73941e-06	4	4.93633e-06	2	4.86148e-06	3	9.17258e-06	6	6.96735e-05	18	5.42819e-06	4	7.68223e-06	4	5.6961e-06	6	2.04443e-05	9			1.60534e-05	8	8.36827e-06	4	1.61067e-05	8	2.10993e-06	1	1.01279e-05	5	1.27838e-05
enzyme_ec	2.7.1.83	transferases transferring phosphorus-containing groups phosphotransferases with an alcohol group as acceptor pseudouridine kinase	1.24037e-06	1	1.40048e-06	1	6.48852e-07	1			7.62215e-07	1					6.13155e-06	2	2.28326e-06	1	6.91061e-06	2	8.80181e-06	5	1.33347e-06	1					1.78779e-06	1	7.04416e-06	5					1.49631e-05	7	6.36139e-06	4	1.70662e-06	1			1.6313e-06	1	1.10142e-06
enzyme_ec	2.7.1.85	transferases transferring phosphorus-containing groups phosphotransferases with an alcohol group as acceptor Î²-glucoside kinase	1.46099e-05	6	9.28318e-06	8	1.53654e-05	9			2.23049e-05	9	4.89019e-06	4	3.61455e-05	19	2.97582e-05	13	2.37658e-05	8			3.61451e-06	3	1.46386e-05	6	3.16255e-06	2	1.2878e-05	8	2.54574e-06	2			1.2695e-05	4	2.25088e-05	9	2.13991e-05	10	7.49079e-06	5	4.34831e-06	3	6.34599e-06	2	7.55216e-06	6	1.89526e-05
enzyme_ec	2.7.1.89	transferases transferring phosphorus-containing groups phosphotransferases with an alcohol group as acceptor thiamine kinase	0.000571037	55	0.00047162	72	0.000440658	43	0.000717441	53	0.000450075	41	0.000837352	74	0.00118156	69	0.00089669	63	0.000106377	17	0.000153803	22	0.000373315	48	0.000204656	37	0.000550029	66	0.000719924	47	0.00100093	23	0.00122701	80	0.000390388	45	0.000852838	71	0.000661422	54	0.000719565	61	0.000713676	62	0.000736064	60	0.000408846	80	0.000415582
enzyme_ec	2.7.1.90	transferases transferring phosphorus-containing groups phosphotransferases with an alcohol group as acceptor diphosphateâ€”fructose-6-phosphate 1-phosphotransferase	0.00211707	308	0.00243434	430	0.00200874	293	0.00130343	237	0.00166529	288	0.00232168	354	0.00213869	345	0.00172482	296	0.00163183	243	0.00127356	247	0.00189294	342	0.00206783	320	0.00233214	417	0.00206262	285	0.00139466	219	0.00169062	369	0.0021996	437	0.00164963	353	0.00237966	410	0.00186116	368	0.00183416	336	0.00188766	286	0.00238517	431	0.00190224
enzyme_ec	2.7.1.92	transferases transferring phosphorus-containing groups phosphotransferases with an alcohol group as acceptor 5-dehydro-2-deoxygluconokinase	4.36744e-05	10	9.46627e-05	22	0.000111729	18	4.26747e-05	10	6.8396e-05	17	6.41276e-05	16	0.0001096	19	3.90884e-05	6	1.03306e-05	3	5.15329e-05	18	6.95053e-06	3	7.77648e-05	14	5.38005e-05	16	0.000119653	17	5.94603e-05	12	8.60964e-05	14	2.70729e-05	11	3.4814e-05	14	3.27924e-05	10	5.27675e-05	13	9.73413e-05	22	1.70761e-05	8	9.49644e-05	16	0.000134362
enzyme_ec	2.7.1.95	transferases transferring phosphorus-containing groups phosphotransferases with an alcohol group as acceptor kanamycin kinase	2.61599e-06	1													1.94802e-06	1					1.09909e-05	3							0.000108921	9									0	0					4.38127e-06	2
enzyme_ec	2.7.10.1	transferases transferring phosphorus-containing groups protein-tyrosine kinases receptor protein-tyrosine kinase	0.000233086	26	9.33969e-06	5	5.637e-07	1	0	0	5.47656e-05	9	0.000300948	66	2.82772e-06	2	1.77292e-05	7	5.88169e-06	3	0.00012551	27	1.87043e-06	2	1.55312e-05	7	6.693e-07	1	0.000212554	29	0.0011558	214	2.23566e-05	14	3.93547e-05	7	0.0031327	290	0.00012286	22	0.000148065	22	5.45078e-05	10	0.000304243	37	0.00125445	164	0.000878705
enzyme_ec	2.7.10.2	transferases transferring phosphorus-containing groups protein-tyrosine kinases non-specific protein-tyrosine kinase	0	0	3.88514e-06	4	7.61226e-06	5			4.2932e-06	3	1.24326e-06	1	9.68726e-06	6	2.8103e-06	2			8.59128e-06	6	1.2857e-06	1	1.99319e-06	1			3.8177e-06	2	1.14539e-05	4	1.96404e-06	2	3.82299e-06	3			2.24209e-05	4	4.47111e-07	1			4.64005e-06	2	1.68969e-06	1	3.32961e-06
enzyme_ec	2.7.10.3	transferases transferring phosphorus-containing groups protein-tyrosine kinases bacterial tyrosine kinase	6.58324e-05	30	0.000158247	68	7.48455e-05	42	2.57215e-05	10	0.000174897	53	0.000113939	41	9.5184e-05	39	0.000135118	50	9.0723e-05	43	9.39891e-06	8	3.55665e-05	17	5.36051e-05	26	8.21187e-05	43	8.86019e-05	40	0.000145816	32	8.05858e-05	40	0.000211374	82	8.18911e-05	44	6.58939e-05	36	7.22066e-05	35	3.95597e-05	23	6.99795e-05	32	0.000104425	61	0.000193809
enzyme_ec	2.7.11.-		0.000526834	84	0.000483545	110	0.000284129	68	0.000249889	38	0.000573779	92	0.000487597	90	0.000450261	86	0.000461902	89	0.000426219	69	0.000421754	58	0.000365003	90	0.000382163	76	0.000372206	96	0.00042145	85	0.000297764	46	0.000492712	109	0.00054936	133	0.000427144	85	0.000338834	72	0.000468546	94	0.000392103	98	0.000381613	72	0.000470001	94	0.00024217
enzyme_ec	2.7.11.1	transferases transferring phosphorus-containing groups protein-serine/threonine kinases non-specific serine/threonine protein kinase	0.000487154	107	0.000119714	65	4.78979e-05	29	5.92542e-05	26	0.000138448	53	0.000603794	128	9.10392e-05	57	0.000273298	109	0.000204961	55	0.00031501	48	0.000242084	59	8.03251e-05	22	0.0001019	65	0.000319228	66	0.00151229	283	0.000302565	113	0.000290951	93	0.00360334	353	0.00025763	69	0.000344737	71	0.000204152	56	0.000460039	90	0.00158061	229	0.00132487
enzyme_ec	2.7.11.13	transferases transferring phosphorus-containing groups protein-serine/threonine kinases protein kinase c	0	0	0	0	0	0					0	0			0	0	0	0					0	0	0	0	0	0			1.71016e-06	2	0	0	0	0					0	0	0	0
enzyme_ec	2.7.11.17	transferases transferring phosphorus-containing groups protein-serine/threonine kinases ca2+/calmodulin-dependent protein kinase											3.51273e-06	2							1.45717e-06	1									5.75686e-06	1	1.09561e-06	1			4.16732e-06	1			8.70229e-07	1	1.4342e-06	1	1.30994e-06	1	3.23178e-06	1	2.9172e-06
enzyme_ec	2.7.13.3	transferases transferring phosphorus-containing groups protein-histidine kinases histidine kinase	0.000300422	93	0.000265147	119	0.000289035	101	0.0001595	55	0.000190376	43	0.000206733	68	0.00014588	69	0.000414265	106	0.000362797	66	3.70985e-05	11	0.000735272	149	3.71499e-05	17	0.00034202	126	0.000182564	64	9.23563e-05	21	0.000282474	96	0.000672484	147	8.16696e-05	54	8.71122e-05	40	0.000120556	43	0.000339472	98	0.000232445	79	0.000173379	71	0.00036089
enzyme_ec	2.7.14.1	transferases transferring phosphorus-containing groups protein-arginine kinases protein arginine kinase	4.51229e-05	13	5.24057e-05	19			5.07437e-05	12	2.02577e-06	3	1.18794e-05	7	2.89939e-05	9	8.58583e-05	12	5.57999e-06	4			2.77191e-05	13			2.43873e-05	14	5.60632e-05	12	8.03889e-05	14	0.00010309	22	5.8701e-06	9	6.27935e-05	20	1.8184e-05	11	0.000182008	15	2.08581e-05	8	6.43913e-05	18	7.5813e-06	8	4.69862e-05
enzyme_ec	2.7.2.1	transferases transferring phosphorus-containing groups phosphotransferases with a carboxy group as acceptor acetate kinase	0.0039363	469	0.00353452	582	0.00299355	483	0.00248197	385	0.00398421	505	0.00387276	617	0.00403892	536	0.00356549	401	0.00370582	429	0.00250498	388	0.00403121	572	0.00391116	531	0.00408436	614	0.00417946	519	0.0028813	325	0.00442431	570	0.00417446	679	0.00369963	629	0.00419133	551	0.00383224	567	0.00410878	632	0.00391354	511	0.00392633	603	0.00383358
enzyme_ec	2.7.2.11	transferases transferring phosphorus-containing groups phosphotransferases with a carboxy group as acceptor glutamate 5-kinase	2.19709e-05	16	2.06755e-05	15	3.35338e-05	15	1.401e-06	2	3.28454e-05	18	4.07281e-05	29	3.7443e-05	24	3.21672e-05	20	1.675e-05	13	3.11528e-06	3	1.31753e-05	10	1.77799e-05	12	4.2693e-05	25	2.01284e-05	15	4.92917e-05	14	2.429e-05	14	2.54554e-05	26	2.49145e-05	21	1.77713e-05	13	2.70747e-05	19	6.5096e-06	7	1.44398e-05	11	4.08053e-05	18	2.70861e-05
enzyme_ec	2.7.2.18	transferases transferring phosphorus-containing groups phosphotransferases with a carboxy group as acceptor fatty acid kinase	0.00106423	177	0.000795839	198	0.00038853	106	0.000253796	69	0.00118428	221	0.000844866	180	0.00102556	200	0.00119047	178	0.000977584	155	9.97394e-05	37	0.000468935	133	0.00061342	104	0.000625704	160	0.000815956	163	0.000743125	105	0.000729748	164	0.00071085	199	0.000920728	179	0.000734492	135	0.000827881	159	0.000727904	158	0.00073014	148	0.000649887	157	0.000747067
enzyme_ec	2.7.2.2	transferases transferring phosphorus-containing groups phosphotransferases with a carboxy group as acceptor carbamate kinase	0.00065811	119	0.000707675	180	0.000508092	121	0.000512869	82	0.000940485	163	0.000901714	174	0.000807947	155	0.000836726	118	0.00086817	115	0.000253444	60	0.00054537	106	0.000826556	155	0.000630569	149	0.000761362	141	0.000483993	73	0.000620222	145	0.000862235	186	0.000797256	161	0.000421316	99	0.000829968	129	0.000595923	133	0.000735481	140	0.000656668	138	0.000607856
enzyme_ec	2.7.2.3	transferases transferring phosphorus-containing groups phosphotransferases with a carboxy group as acceptor phosphoglycerate kinase	0.00827199	487	0.00812477	611	0.00834319	648	0.00590435	508	0.0103217	527	0.0100883	670	0.00978178	601	0.00934784	503	0.00841739	460	0.00384139	463	0.00899134	684	0.0105001	567	0.00905242	682	0.0093849	592	0.00814058	509	0.00827291	627	0.00860989	616	0.0100612	750	0.00896126	694	0.00871805	641	0.00891246	695	0.0099613	623	0.009279	661	0.00993775
enzyme_ec	2.7.2.4	transferases transferring phosphorus-containing groups phosphotransferases with a carboxy group as acceptor aspartate kinase	0.000970362	199	0.00128726	287	0.00114201	232	0.000392461	82	0.00112382	242	0.00127223	271	0.00147759	268	0.00137517	271	0.00120213	240	0.000397766	117	0.000859671	223	0.000912644	227	0.00170223	363	0.00113991	249	0.000954251	117	0.00121247	287	0.00120197	322	0.000993398	237	0.00104084	246	0.00106928	228	0.000887038	227	0.000959044	211	0.000919827	242	0.00123964
enzyme_ec	2.7.2.7	transferases transferring phosphorus-containing groups phosphotransferases with a carboxy group as acceptor butyrate kinase	0.000224398	56	0.000298344	84	0.000376931	64	0.000463675	62	0.000169672	48	0.000126088	47	9.60227e-05	39	0.000243293	33	7.94071e-05	23	0.000160838	45	0.000459287	67	0.000122057	28	0.00024476	60	0.000120432	44	0.000291775	43	0.000271764	67	0.000186276	48	0.000262939	61	0.000345147	78	0.000235989	67	0.000225092	44	0.000247134	66	0.000274488	61	0.000203139
enzyme_ec	2.7.2.8	transferases transferring phosphorus-containing groups phosphotransferases with a carboxy group as acceptor acetylglutamate kinase	0.000229698	62	0.000279599	113	0.000169846	60	0.00011341	33	0.00037562	82	0.000229627	74	0.000273076	92	0.000121987	54	7.05757e-05	32	5.76981e-05	21	0.000194023	69	0.000145987	50	0.000267192	104	0.000227458	73	9.89855e-05	28	0.000185712	65	0.000218224	85	0.00024048	85	0.000173594	64	0.000235679	70	0.000126211	52	0.000147271	54	0.000289219	94	0.000230239
enzyme_ec	2.7.3.-		4.27156e-06	1	2.78452e-06	3			3.36062e-06	1	1.32969e-06	1	0	0	3.42319e-06	2	9.84178e-07	1	7.04009e-07	1	5.51564e-06	1											2.08604e-05	2	5.87962e-06	1	3.01118e-06	1	3.57448e-05	4	1.55139e-06	1	4.67617e-06	1	3.03211e-06	2	1.66562e-06	1	1.94871e-06
enzyme_ec	2.7.3.13	transferases transferring phosphorus-containing groups phosphotransferases with a nitrogenous group as acceptor glutamine kinase	9.57373e-06	4							1.6324e-05	6															2.8059e-07	1					8.88379e-07	2	1.69117e-05	10					1.01753e-05	4					3.57476e-07	1	2.44977e-07
enzyme_ec	2.7.3.2	transferases transferring phosphorus-containing groups phosphotransferases with a nitrogenous group as acceptor creatine kinase	0.000145618	16	0.000231455	18	0.000438316	26	0.00044987	20	0.000183358	12	0.000222591	16	0.000259714	18	0.000172008	10	0.000111502	8	0.000657173	33	0.000316237	23	0.000178479	14	0.00011762	17	0.000242865	16	0.000294434	15	0.000340447	25	0.000123727	18	0.000242594	22	0.000284064	19	0.000238801	17	0.000288829	20	0.000348493	26	0.000296345	27	0.000333637
enzyme_ec	2.7.3.9	transferases transferring phosphorus-containing groups phosphotransferases with a nitrogenous group as acceptor phosphoenolpyruvateâ€”protein phosphotransferase	0.00100546	182	0.000810185	218	0.000716432	157	0.000468254	96	0.00113865	198	0.001258	208	0.00101647	192	0.0010404	175	0.000741261	151	0.000326934	62	0.000616947	166	0.000876852	166	0.00059799	180	0.000996445	187	0.00187162	149	0.000760484	202	0.000775043	229	0.000962192	235	0.000700416	148	0.00105417	208	0.000784549	175	0.000774973	155	0.00110237	230	0.00150766
enzyme_ec	2.7.4.-		0.000526834	84	0.000483545	110	0.000284129	68	0.000249889	38	0.000573779	92	0.000487597	90	0.000450261	86	0.000461902	89	0.000426219	69	0.000421754	58	0.000365003	90	0.000382163	76	0.000372206	96	0.00042145	85	0.000297764	46	0.000492712	109	0.00054936	133	0.000427144	85	0.000338834	72	0.000468546	94	0.000392103	98	0.000381613	72	0.000470001	94	0.00024217
enzyme_ec	2.7.4.1	transferases transferring phosphorus-containing groups phosphotransferases with a phosphate group as acceptor atp-polyphosphate phosphotransferase	0.000216496	93	0.000220798	114	7.31719e-05	38	5.15559e-05	20	0.000198824	74	0.00024279	97	0.000154116	95	0.000365096	83	0.000178536	62	1.32507e-05	12	0.000232227	92	2.52958e-05	20	0.000302205	124	0.000277673	83	0.000117262	35	0.000241505	107	0.000219525	124	0.000179082	91	8.86949e-05	55	0.000275481	98	0.000194923	91	0.000198464	70	0.000171964	82	0.000350528
enzyme_ec	2.7.4.14	transferases transferring phosphorus-containing groups phosphotransferases with a phosphate group as acceptor ump/cmp kinase	3.99661e-05	19	2.0512e-05	16	1.50815e-05	10	2.1596e-05	5	3.73624e-05	17	3.03382e-05	18	3.84383e-05	20	4.12362e-05	25	4.94911e-05	28	1.20149e-05	8	2.60702e-05	15	1.66617e-05	11	3.73582e-05	24	3.04589e-05	13	4.40668e-05	8	0.000100429	26	3.18542e-05	20	4.35208e-05	21	1.51177e-05	12	4.81796e-05	19	5.17576e-05	17	6.09881e-05	14	5.11138e-05	26	3.17096e-05
enzyme_ec	2.7.4.16	transferases transferring phosphorus-containing groups phosphotransferases with a phosphate group as acceptor thiamine-phosphate kinase	9.74377e-06	7	2.36232e-05	7	2.67857e-05	6	2.63891e-06	2	4.23617e-06	3	8.74124e-06	6	2.80304e-05	11	3.00365e-06	3	8.11396e-06	4	1.34415e-06	1	4.6106e-06	3	7.8419e-06	5	2.81971e-05	8	1.35412e-05	5	2.94359e-06	1	2.73639e-06	2	2.70865e-05	13	5.8184e-06	5	5.338e-05	8	2.55998e-06	3	8.68632e-06	6	8.53135e-06	7	4.99468e-06	5	1.33238e-05
enzyme_ec	2.7.4.22	transferases transferring phosphorus-containing groups phosphotransferases with a phosphate group as acceptor ump kinase	0.000541337	104	0.000529563	146	0.000360755	89	0.000156354	42	0.000597199	119	0.000535048	134	0.000662715	125	0.000622027	111	0.000633573	102	0.000143755	46	0.000399298	105	0.000468287	113	0.000501456	135	0.00060574	130	0.00034594	54	0.000555325	127	0.000486258	135	0.00055487	147	0.00050707	128	0.000569846	133	0.000442044	118	0.000536293	117	0.000417862	119	0.000567989
enzyme_ec	2.7.4.25	transferases transferring phosphorus-containing groups phosphotransferases with a phosphate group as acceptor (d)cmp kinase	0.000229712	74	0.000193972	73	0.000142563	52	6.34024e-05	20	0.000185082	67	0.000191337	61	0.000166035	67	0.000237981	79	0.000292992	88	2.0432e-05	11	0.000143046	45	0.000175527	62	0.000178957	70	0.000223723	58	3.1024e-05	11	0.000267442	71	0.000163505	73	0.000204116	80	8.89976e-05	40	0.000176123	62	0.000172155	55	0.000245258	66	0.000178043	68	0.000142438
enzyme_ec	2.7.4.3	transferases transferring phosphorus-containing groups phosphotransferases with a phosphate group as acceptor adenylate kinase	0.00108859	181	0.00126187	221	0.00112253	192	0.000927769	164	0.0012235	178	0.00131891	204	0.00118537	194	0.00114422	176	0.000987405	136	0.000402606	113	0.00121013	227	0.00117558	181	0.00136088	239	0.00114774	185	0.000695269	105	0.00137012	217	0.00127422	263	0.0011179	218	0.00107795	223	0.00128084	263	0.00140027	245	0.00131063	213	0.00129328	242	0.00136028
enzyme_ec	2.7.4.33	transferases transferring phosphorus-containing groups phosphotransferases with a phosphate group as acceptor amp-polyphosphate phosphotransferase	9.17054e-05	26	4.08042e-05	20	2.55333e-05	12	2.72552e-05	6	7.53059e-05	22	0.000104797	22	4.18482e-05	18	3.22033e-05	11	4.62333e-05	17	3.28813e-06	2	7.92709e-05	26			5.83127e-05	26	6.88958e-05	22	1.61561e-05	6	4.13441e-05	25	8.37574e-05	35	1.41313e-05	9	1.51297e-05	8	0.000100873	27	8.4187e-05	31	7.00627e-05	28	8.0432e-05	25	4.0208e-05
enzyme_ec	2.7.4.6	transferases transferring phosphorus-containing groups phosphotransferases with a phosphate group as acceptor nucleoside-diphosphate kinase	0.000121712	18	0.000117701	27	0.000345588	43	0.000243703	30	7.0833e-05	19	0.000218708	37	0.00015324	30	8.87514e-05	19	9.62503e-05	15	0.00017576	26	9.59031e-05	24	0.00013399	29	0.000103585	25	0.000136893	31	0.000123579	19	6.52418e-05	20	7.74124e-05	27	7.83136e-05	19	0.000148083	35	7.78478e-05	25	0.000130685	40	0.00010131	23	0.000159402	35	0.000278054
enzyme_ec	2.7.4.7	transferases transferring phosphorus-containing groups phosphotransferases with a phosphate group as acceptor phosphooxymethylpyrimidine kinase	8.44233e-05	30	2.23968e-05	19	2.27062e-05	12	6.15832e-06	3	8.44085e-05	36	1.59832e-05	7	2.82028e-05	20	0.000136081	38	4.73775e-05	15	1.02332e-05	6	2.50426e-05	12	8.61888e-05	30	3.24465e-05	14	8.3526e-05	31	9.27675e-06	7	1.36193e-05	12	3.6498e-05	20	4.22759e-05	23	3.43316e-05	15	8.48862e-05	43	6.60738e-05	22	6.90832e-05	24	3.24526e-05	15	0.000121912
enzyme_ec	2.7.4.8	transferases transferring phosphorus-containing groups phosphotransferases with a phosphate group as acceptor guanylate kinase	7.39165e-05	26	8.71819e-05	46	7.26118e-05	31	3.30653e-05	14	0.000121709	56	8.0238e-05	34	0.000137347	47	0.000115273	43	8.95801e-05	35	1.23811e-05	7	3.2896e-05	18	7.0128e-05	30	0.000124464	46	8.0393e-05	34	2.56886e-05	9	8.18841e-05	43	8.50684e-05	46	0.000100295	44	7.20409e-05	20	0.000104888	42	6.80088e-05	34	8.23919e-05	31	7.61866e-05	32	8.11989e-05
enzyme_ec	2.7.4.9	transferases transferring phosphorus-containing groups phosphotransferases with a phosphate group as acceptor dtmp kinase	1.02025e-05	7	1.92289e-06	2	2.96778e-07	1	6.4854e-07	1	5.40681e-06	4	7.43317e-06	8	1.09918e-05	7	1.24254e-05	7	2.06829e-05	13	2.68579e-06	2	1.46559e-06	1			4.35335e-06	5	2.4708e-06	2	1.84609e-06	1	1.29222e-05	7	1.49092e-06	3	2.43098e-06	2	4.4295e-05	16	5.56719e-06	4	9.21761e-07	1	2.98123e-06	2	1.98158e-06	3	1.01526e-05
enzyme_ec	2.7.6.1	transferases transferring phosphorus-containing groups diphosphotransferases ribose-phosphate diphosphokinase	0.00127828	249	0.0012224	299	0.00123715	286	0.000763191	163	0.00148495	292	0.00167041	308	0.00133391	279	0.00107801	191	0.000784011	156	0.000577359	176	0.000866265	230	0.00129467	270	0.00134775	328	0.00136058	275	0.0020359	194	0.00137212	318	0.00123564	322	0.00126983	282	0.00119672	291	0.00129392	298	0.00108831	266	0.00124205	233	0.00136774	309	0.00142256
enzyme_ec	2.7.6.2	transferases transferring phosphorus-containing groups diphosphotransferases thiamine diphosphokinase	9.50984e-06	2	2.75317e-06	4					1.78342e-05	7	1.38124e-06	2	8.83284e-07	1	5.38675e-06	3	8.83461e-07	1			9.44781e-06	6			6.91483e-06	5	1.0719e-05	3	0	0	4.17613e-07	1	8.74081e-06	5	9.69827e-06	4	2.49277e-05	2	1.03061e-05	5			7.46997e-06	5	4.34549e-07	1	1.374e-06
enzyme_ec	2.7.6.3	transferases transferring phosphorus-containing groups diphosphotransferases 2-amino-4-hydroxy-6-hydroxymethyldihydropteridine diphosphokinase	2.08787e-05	6	1.09936e-05	9	5.17178e-06	3	5.7632e-06	4	7.13763e-06	5	1.94037e-05	10	3.87414e-06	3	3.26254e-06	2	3.44135e-06	4	3.90717e-06	4	1.11474e-05	8	4.97796e-06	4	7.5057e-06	6	8.53068e-06	6	8.84687e-06	4	4.97359e-06	5	2.05681e-05	14	6.78469e-06	3	3.61501e-06	4	7.23688e-06	6	1.22797e-05	9	5.60561e-06	3	3.74499e-05	6	3.24837e-05
enzyme_ec	2.7.6.5	transferases transferring phosphorus-containing groups diphosphotransferases gtp diphosphokinase	0.000100241	53	0.000151547	82	0.000140041	53	2.10445e-05	12	0.000174461	63	8.61155e-05	45	8.65125e-05	49	7.71669e-05	41	4.78603e-05	26	1.14561e-05	5	0.000108356	61	2.90934e-05	9	0.000107516	59	0.000182378	72	9.48383e-05	32	7.55825e-05	61	0.000100189	65	2.56789e-05	18	3.09951e-05	22	6.30972e-05	46	5.88502e-05	39	7.72464e-05	41	7.54743e-05	45	0.00022362
enzyme_ec	2.7.7.-		1.6463e-07	1									3.21377e-07	1	6.0286e-07	1	4.183e-06	5	2.05596e-06	2	6.69319e-06	3	4.37006e-07	1	1.34705e-06	1	9.12099e-07	2			2.72645e-06	2	1.61685e-06	3	8.07982e-05	1			9.28166e-07	1	6.25479e-06	6	1.22515e-06	2	3.62761e-06	1	3.93216e-07	1	3.72903e-06
enzyme_ec	2.7.7.1	transferases transferring phosphorus-containing groups nucleotidyltransferases nicotinamide-nucleotide adenylyltransferase	1.62145e-05	7	8.39643e-06	3	3.67985e-06	1			7.44202e-06	5	1.35986e-05	11	3.36363e-05	14	7.62468e-06	3	2.60651e-06	2	0	0	6.25511e-06	5	7.56832e-06	5	7.71877e-05	14	2.69406e-05	7			4.65341e-06	4	1.68315e-05	8	1.64771e-06	2	8.36988e-06	7	7.41078e-07	1	2.41682e-06	3	4.61251e-06	3	1.04507e-05	8	9.04882e-06
enzyme_ec	2.7.7.101	transferases transferring phosphorus-containing groups nucleotidyltransferases dna primase dnag	8.02986e-05	5	6.00992e-06	5	1.60563e-05	5	4.45205e-06	1	1.1138e-05	10	7.80135e-06	6	2.79875e-05	10	2.86423e-05	15	6.73445e-06	5	6.69319e-06	3	5.50743e-06	7	7.92566e-07	1	1.78295e-05	13	1.69364e-05	9	3.54118e-06	3	1.53495e-05	13	5.61467e-06	6	2.7898e-05	17	2.62397e-06	3	1.64234e-05	13	3.54589e-06	5	1.43216e-05	8	4.49664e-06	5	6.92176e-06
enzyme_ec	2.7.7.104	transferases transferring phosphorus-containing groups nucleotidyltransferases 2-hydroxyethylphosphonate cytidylyltransferase	0	0			8.16165e-07	1	2.49747e-06	1	1.96168e-06	2			1.98917e-06	2	1.02484e-05	6	8.93084e-06	3			4.35514e-06	3	3.44166e-05	15	0.000198937	30			0	0	1.13123e-05	7	0.000359676	37	8.98592e-05	24	2.72833e-06	2			7.17629e-06	4			9.55882e-06	4	4.29406e-06
enzyme_ec	2.7.7.108	transferases transferring phosphorus-containing groups nucleotidyltransferases protein adenylyltransferase	4.50754e-07	1	2.79639e-06	3	2.26342e-07	1	1.45211e-06	1	8.33498e-06	4			1.52753e-06	2	5.14718e-06	2	4.75513e-06	1	1.3773e-06	1	4.09771e-06	2							8.3476e-07	1	2.58361e-05	9	1.12103e-05	8	1.29562e-07	1	9.60665e-07	1	4.23808e-06	2	4.41621e-06	3	3.83087e-06	2			3.56286e-06
enzyme_ec	2.7.7.12	transferases transferring phosphorus-containing groups nucleotidyltransferases udp-glucoseâ€”hexose-1-phosphate uridylyltransferase	4.0446e-05	16	7.19045e-05	33	0.000103709	30	3.53503e-05	13	0.000104796	35	5.50691e-05	23	0.000114193	43	0.000178636	34	0.000280393	35	0.000104969	28	0.000127034	42	5.47059e-05	23	0.000154007	50	0.000216338	47	9.51304e-06	6	0.000185508	58	8.96564e-05	47	0.00021741	55	0.000103398	32	0.000116196	36	0.000140615	43	9.97946e-05	34	3.17101e-05	14	0.000273037
enzyme_ec	2.7.7.13	transferases transferring phosphorus-containing groups nucleotidyltransferases mannose-1-phosphate guanylyltransferase	0.000123741	35	0.000271629	60	7.73494e-05	36	1.04069e-05	5	5.85844e-05	23	0.000123023	36	0.000116871	33	4.10967e-05	20	6.34478e-05	24	2.15509e-05	9	6.90664e-05	21	9.70149e-05	37	0.000168503	37	8.47474e-05	29	9.88595e-06	5	4.54049e-05	25	0.000102994	44	4.741e-05	29	5.14323e-05	21	9.31026e-05	43	6.3365e-05	24	6.54114e-05	27	7.71029e-05	37	0.000189964
enzyme_ec	2.7.7.15	transferases transferring phosphorus-containing groups nucleotidyltransferases choline-phosphate cytidylyltransferase	3.61789e-06	3	9.75885e-07	1							1.21255e-05	5	2.70921e-06	1			2.43945e-06	2	1.32727e-06	1	2.35926e-05	9	2.23896e-05	8	5.78429e-06	4			7.24097e-06	1	8.84794e-06	6			1.03931e-06	1			7.32196e-06	5			2.07605e-06	1	2.64489e-06	2	3.94149e-05
enzyme_ec	2.7.7.18	transferases transferring phosphorus-containing groups nucleotidyltransferases nicotinate-nucleotide adenylyltransferase			5.25882e-07	1			0	0	1.51301e-06	1	0	0	8.39569e-07	2	1.15346e-06	1									4.0265e-06	4	7.14891e-12	1			2.1842e-06	3	7.52071e-06	4			1.96588e-06	2	6.48309e-07	1					1.62467e-07	1
enzyme_ec	2.7.7.19	transferases transferring phosphorus-containing groups nucleotidyltransferases polynucleotide adenylyltransferase	4.31825e-06	3	1.73324e-06	2	1.27966e-05	3	4.52469e-05	1	1.15833e-06	1	1.68711e-06	1	7.27265e-06	6	3.78921e-06	2	4.56724e-06	4			4.55773e-05	3	1.14686e-06	1	8.16674e-06	5	9.22034e-06	5	0	0	2.73567e-06	5	5.3866e-06	6	1.25644e-05	6	5.53149e-07	1					2.12265e-06	2	2.22832e-06	2	6.12507e-05
enzyme_ec	2.7.7.2	transferases transferring phosphorus-containing groups nucleotidyltransferases fad synthase	1.6809e-06	1	2.67041e-06	3	8.45716e-06	5	7.29305e-06	1	2.52333e-05	5	2.07482e-06	2	2.40594e-06	3	8.44552e-06	7	4.51302e-06	3	3.91397e-06	3					4.9616e-06	5	3.17859e-06	2			3.34973e-06	4	5.61263e-07	1			8.70944e-07	1	6.59118e-07	1	2.85141e-06	2			7.50626e-06	3	2.88808e-05
enzyme_ec	2.7.7.23	transferases transferring phosphorus-containing groups nucleotidyltransferases udp-n-acetylglucosamine diphosphorylase	9.7154e-05	28	5.27539e-05	30	9.23378e-05	21	5.29552e-05	23	0.000112024	42	8.83249e-05	34	0.000180573	52	0.00017817	49	0.000196721	40	6.89429e-05	24	4.63368e-05	27	9.78395e-05	33	8.89495e-05	48	5.47494e-05	29	0.000133476	29	0.000126499	56	9.98974e-05	45	0.000101261	49	0.000165418	54	0.000151628	56	0.000107544	37	0.000119056	34	0.000111668	59	0.000155053
enzyme_ec	2.7.7.24	transferases transferring phosphorus-containing groups nucleotidyltransferases glucose-1-phosphate thymidylyltransferase	0.000732201	122	0.000698296	147	0.000505103	93	0.000341325	61	0.00107334	162	0.000618808	107	0.00095884	134	0.000894955	108	0.00102412	97	0.000294577	56	0.000393451	88	0.000894742	123	0.000612007	129	0.000721771	111	0.000591099	82	0.000549434	105	0.000621429	146	0.000699989	114	0.000702137	125	0.000722462	130	0.000616415	102	0.000639823	91	0.000640055	134	0.000626869
enzyme_ec	2.7.7.27	transferases transferring phosphorus-containing groups nucleotidyltransferases glucose-1-phosphate adenylyltransferase	0.00469472	572	0.00375347	743	0.00302302	548	0.0017112	343	0.00552443	664	0.00395591	638	0.00382684	642	0.00440738	619	0.00326342	476	0.00121918	262	0.00343395	612	0.00391494	589	0.00402844	722	0.00360288	582	0.0037903	423	0.00453298	707	0.00412266	818	0.0042684	774	0.00361328	531	0.00435507	730	0.00392099	667	0.00323732	613	0.00411118	678	0.00360228
enzyme_ec	2.7.7.3	transferases transferring phosphorus-containing groups nucleotidyltransferases pantetheine-phosphate adenylyltransferase	3.01314e-05	10	2.57241e-05	17	1.17426e-05	4	4.13642e-06	3	4.7684e-05	15	3.47628e-05	13	1.96279e-05	9	2.73927e-05	10	3.18748e-05	12	2.30073e-06	1	1.13025e-05	7	1.39018e-05	7	2.45305e-05	13	2.65729e-05	12	3.54672e-06	1	3.3024e-05	17	2.95936e-05	16	3.48385e-05	17	1.35312e-05	7	2.56176e-05	11	7.81318e-06	6	1.77117e-05	8	3.90841e-05	17	1.90729e-05
enzyme_ec	2.7.7.30	transferases transferring phosphorus-containing groups nucleotidyltransferases fucose-1-phosphate guanylyltransferase	6.1707e-05	16			1.08346e-05	6			1.63776e-06	2			4.18987e-07	1	3.73589e-06	3	1.30091e-06	1					6.52349e-07	1					4.97686e-07	1	6.20286e-06	3	8.37752e-06	5			3.34625e-06	3							2.27262e-06	4	9.13668e-07
enzyme_ec	2.7.7.33	transferases transferring phosphorus-containing groups nucleotidyltransferases glucose-1-phosphate cytidylyltransferase	5.93738e-05	16	9.46654e-05	29	2.44041e-05	9	1.79348e-05	7	3.202e-05	14	3.44239e-05	14	4.86683e-05	21	5.38197e-05	22	3.5075e-05	10	6.5819e-06	4	6.57918e-05	19	8.3411e-06	4	5.55039e-05	21	4.61939e-05	15	7.04492e-05	12	6.90327e-05	18	4.5565e-05	25	2.58976e-05	11	1.38679e-05	7	5.36978e-05	20	7.83365e-05	23	3.22478e-05	12	3.35132e-05	14	4.60727e-05
enzyme_ec	2.7.7.38	transferases transferring phosphorus-containing groups nucleotidyltransferases 3-deoxy-manno-octulosonate cytidylyltransferase	1.22849e-05	6	2.14873e-05	9	5.99859e-05	21	5.39054e-06	4	2.03171e-05	10	6.4074e-06	7	1.2507e-05	7	0	0	7.72784e-07	1	1.58724e-05	7	9.40088e-06	4	1.02916e-06	1	5.82709e-05	18	1.16662e-05	5	1.38265e-06	1	7.35922e-06	4	9.70741e-06	6	8.31324e-06	5	8.48356e-06	8	3.66017e-06	3	3.8627e-05	14	2.29442e-05	5	1.28369e-05	7	3.44733e-05
enzyme_ec	2.7.7.39	transferases transferring phosphorus-containing groups nucleotidyltransferases glycerol-3-phosphate cytidylyltransferase	3.29312e-05	12	1.38749e-05	9	8.60653e-06	6	3.33607e-06	2	1.34494e-05	3	3.76648e-05	10	9.46578e-06	7	2.38645e-05	5	7.57614e-07	1	2.24558e-05	6	6.90299e-06	3	1.2629e-05	3	3.32691e-06	2	1.05088e-05	5	6.67665e-06	1	1.81875e-05	6	1.25398e-05	9	3.46372e-06	3	5.72773e-06	4	2.44603e-05	10	1.00815e-05	5	7.00623e-06	2	1.75382e-05	7	1.22109e-05
enzyme_ec	2.7.7.4	transferases transferring phosphorus-containing groups nucleotidyltransferases sulfate adenylyltransferase	0.000132911	44	9.60384e-05	45	0.000177728	37	0.00050423	43	0.000214526	62	0.000200777	56	0.000255802	73	4.82481e-05	19	0.000190457	66	6.7374e-05	25	0.000477897	63	0.000229326	62	0.000426347	112	0.000506272	90	0.000339428	29	0.000638221	79	0.000255514	109	0.000135859	54	0.000209989	56	0.000149783	51	7.37868e-05	32	0.000269053	65	9.21502e-05	33	0.000210638
enzyme_ec	2.7.7.40	transferases transferring phosphorus-containing groups nucleotidyltransferases d-ribitol-5-phosphate cytidylyltransferase	0.000110587	31	5.64079e-05	22	5.34039e-05	21	6.30156e-05	16	7.07533e-05	26	6.82779e-05	25	5.87464e-05	27	5.91393e-05	20	6.08745e-05	20	6.81005e-06	5	4.97337e-05	18	9.54725e-06	6	6.63224e-05	22	8.72294e-05	21	5.72712e-06	2	8.8859e-05	25	5.24135e-05	28	6.77112e-05	23	4.81361e-05	15	0.00014501	39	5.32452e-05	23	7.30407e-05	23	5.89919e-05	28	8.11722e-05
enzyme_ec	2.7.7.43	transferases transferring phosphorus-containing groups nucleotidyltransferases n-acylneuraminate cytidylyltransferase	2.48028e-05	6	1.85132e-06	1	8.18644e-07	1					6.15156e-06	2							7.06509e-07	1							4.94284e-06	2	8.79594e-07	1	6.16999e-07	1	1.10756e-05	6											1.25702e-05	5
enzyme_ec	2.7.7.49	transferases transferring phosphorus-containing groups nucleotidyltransferases rna-directed dna polymerase	2.30901e-06	2	4.15001e-06	1	9.87783e-07	1	2.21071e-06	1	3.60921e-06	1	1.16082e-06	1	4.87097e-06	2	1.89388e-06	2			1.42746e-06	1	1.22767e-05	2	5.56558e-07	1	4.08205e-06	3	3.08586e-06	1	0	0	3.06983e-06	1	1.5031e-05	5	9.68265e-07	1	9.86212e-06	3	3.01073e-06	2	1.01512e-05	2
enzyme_ec	2.7.7.5	transferases transferring phosphorus-containing groups nucleotidyltransferases sulfate adenylyltransferase (adp)	9.07426e-07	1							3.24358e-06	2	7.60151e-07	1																			2.62725e-07	1									7.07144e-06	4			4.32636e-06	3
enzyme_ec	2.7.7.53	transferases transferring phosphorus-containing groups nucleotidyltransferases atp adenylyltransferase	9.74336e-05	23	6.75777e-05	23	1.24212e-05	8	3.41337e-05	10	3.42922e-05	17	7.16734e-05	23	5.73404e-05	19	6.12645e-05	15	0.000109421	24	9.35126e-06	5	0.000120662	36	9.09305e-05	28	0.000177953	33	0.000116954	29	1.36232e-05	3	6.91958e-05	23	0.000127037	43	6.70341e-05	28	3.44574e-05	16	2.11983e-05	14	5.01889e-05	22	5.54142e-05	24	0.000101606	32	1.03909e-05
enzyme_ec	2.7.7.6	transferases transferring phosphorus-containing groups nucleotidyltransferases dna-directed rna polymerase	0.0111074	1405	0.011096	1754	0.010488	1525	0.00741397	1070	0.0101127	1360	0.0121588	1670	0.0119772	1590	0.0120284	1443	0.00957509	1192	0.00518415	989	0.0113647	1732	0.00503879	730	0.0124725	1855	0.0114794	1400	0.0121748	1271	0.0123989	1858	0.01134	1977	0.00918753	1455	0.0105937	1582	0.0112189	1619	0.0114398	1830	0.0103927	1373	0.0104606	1749	0.0126708
[truncated: 48,968 more rows]
[truncated: 35 more columns]

## Sheet: GlobalProteinTaxonomy
taxon_type	taxon	BHC02_Pellet_AS	BHC02_Pellet_AS_Npeptides	BHC03_Pellet_AS	BHC03_Pellet_AS_Npeptides	BHC12_Pellet_AS	BHC12_Pellet_AS_Npeptides	BHC13_Pellet_AS	BHC13_Pellet_AS_Npeptides	BHC15_Pellet_AS	BHC15_Pellet_AS_Npeptides	BHC17_Pellet_AS	BHC17_Pellet_AS_Npeptides	BHC18_Pellet_AS	BHC18_Pellet_AS_Npeptides	BHC19_Pellet_AS	BHC19_Pellet_AS_Npeptides	BHC20_Pellet_AS	BHC20_Pellet_AS_Npeptides	BHC25_Pellet_AS	BHC25_Pellet_AS_Npeptides	BHC27_Pellet_AS	BHC27_Pellet_AS_Npeptides	BHC28_Pellet_AS	BHC28_Pellet_AS_Npeptides	BHC29_Pellet_AS	BHC29_Pellet_AS_Npeptides	BHC31_Pellet_AS	BHC31_Pellet_AS_Npeptides	BHC32_Pellet_AS	BHC32_Pellet_AS_Npeptides	KHC01_Pellet_AS	KHC01_Pellet_AS_Npeptides	KHC02_Pellet_AS	KHC02_Pellet_AS_Npeptides	KHC03_Pellet_AS	KHC03_Pellet_AS_Npeptides	KHC04_Pellet_AS	KHC04_Pellet_AS_Npeptides	KHC06_Pellet_AS	KHC06_Pellet_AS_Npeptides	KHC07_Pellet_AS	KHC07_Pellet_AS_Npeptides	KHC08_Pellet_AS	KHC08_Pellet_AS_Npeptides	KHC09_Pellet_AS	KHC09_Pellet_AS_Npeptides	KHC10_Pellet_AS	KHC10_Pellet_AS_Npeptides
[truncated: 13,155 more rows]
[truncated: 34 more columns]
