# Supplementary material for: Expanding the human metaproteome: enhancing small open reading frame (smORF) prediction and ultra-deep detection of smORF-encoded proteins in the gut microbiome
Source: Research Square preprint supplement (doi:10.21203/rs.3.rs-7768562/v1), 2025-11-06
Supplement: Supplementary file 2 [file 6c272cd92e3fab90b9aa29bb.xlsx]

## Sheet: SEPFunctional
function_type	function	description	BHC02_Pellet_AS	BHC02_Pellet_AS_Npeptides	BHC03_Pellet_AS	BHC03_Pellet_AS_Npeptides	BHC12_Pellet_AS	BHC12_Pellet_AS_Npeptides	BHC13_Pellet_AS	BHC13_Pellet_AS_Npeptides	BHC15_Pellet_AS	BHC15_Pellet_AS_Npeptides	BHC17_Pellet_AS	BHC17_Pellet_AS_Npeptides	BHC18_Pellet_AS	BHC18_Pellet_AS_Npeptides	BHC19_Pellet_AS	BHC19_Pellet_AS_Npeptides	BHC20_Pellet_AS	BHC20_Pellet_AS_Npeptides	BHC25_Pellet_AS	BHC25_Pellet_AS_Npeptides	BHC27_Pellet_AS	BHC27_Pellet_AS_Npeptides	BHC28_Pellet_AS	BHC28_Pellet_AS_Npeptides	BHC29_Pellet_AS	BHC29_Pellet_AS_Npeptides	BHC31_Pellet_AS	BHC31_Pellet_AS_Npeptides	BHC32_Pellet_AS	BHC32_Pellet_AS_Npeptides	KHC01_Pellet_AS	KHC01_Pellet_AS_Npeptides	KHC02_Pellet_AS	KHC02_Pellet_AS_Npeptides	KHC03_Pellet_AS	KHC03_Pellet_AS_Npeptides	KHC04_Pellet_AS	KHC04_Pellet_AS_Npeptides	KHC06_Pellet_AS	KHC06_Pellet_AS_Npeptides	KHC07_Pellet_AS	KHC07_Pellet_AS_Npeptides	KHC08_Pellet_AS	KHC08_Pellet_AS_Npeptides	KHC09_Pellet_AS	KHC09_Pellet_AS_Npeptides	KHC10_Pellet_AS
PUF	unannotated		0.075377	286	0.0549089	394	0.0547239	284	0.063267	316	0.0567936	249	0.0565106	374	0.0808641	284	0.054462	267	0.0456647	359	0.0769006	254	0.0723422	257	0.0511934	242	0.079289	346	0.061643	276	0.0934017	186	0.0698117	332	0.0798751	352	0.0533107	350	0.0704067	329	0.0713353	347	0.0692838	481	0.0587757	307	0.0594483	339	0.06218
arcog	arCOG00228																				7.25733e-05	1					0.000160306	2			0.000108767	1									0	0	0.000153818	2
arcog	arCOG00998																				0.00458168	6	0.00016525	1			0.000274268	2			0.000398421	1									0.000121372	1	0.000209482	2
arcog	arCOG01752						0	0													0.00220342	4	0.000101546	1			0.000206246	2			0.000645478	2											0.000152052	2
arcog	arCOG01845																				0.00310448	5	4.07913e-05	1																			0	0
arcog	arCOG01972																				0.000833182	2					3.78099e-05	1													0	0
arcog	arCOG01988						4.46664e-05	1													0.00161253	6					9.30691e-05	2													3.65308e-05	1	5.57346e-05	1					1.9605e-05
arcog	arCOG02144						0.00144645	7					0.000481866	4							0.0206851	18	0.00109103	4			0.00110316	7			0.00181644	3							0.000466077	3	0.000354677	2	0.0066786	9
arcog	arCOG02155						0.000190378	2													0.00770693	20	0.000882231	5			0.000454425	5			0.000635517	3									0.000173999	3	0.000430708	6					0.000132452
arcog	arCOG02487																				0.00143997	3									0	0									0.000268958	1	6.70023e-05	1					6.18015e-05
arcog	arCOG02492																																										6.70023e-05	1					6.18015e-05
arcog	arCOG04109						7.58193e-05	1													0.00113291	1	0.000123958	1			7.93326e-05	1			0.000358807	1											7.42433e-05	1
arcog	arCOG04129																				0.00181554	4					0	0											7.85335e-05	1	7.28495e-05	1	2.20124e-05	1
arcog	arCOG04168						7.2051e-05	1													0.00207666	2					0.000181648	1															0	0
arcog	arCOG04175						9.78143e-05	1													0.00337368	4	0.000315688	3			0.000249826	2			0.000702927	3									9.70136e-05	1	0.000220646	3					5.52599e-05
arcog	arCOG04287																																								4.36737e-05	1
arcog	arCOG04308																				0.000485118	4																			3.90446e-05	2	0.000152414	4
arcog	arCOG04314						4.85067e-05	2													0.000304544	4																					0.000283063	3
arcog	arCOG04462						1.81746e-05	1													0.00146119	5									7.50121e-05	1							1.57714e-05	1	0	0	5.94708e-05	2
arcog	arCOG04473						4.051e-05	1													0.00215357	5	0	0			6.71652e-05	1			0	0									0	0	0.000105333	1
arcog	arCOG04905						2.90943e-05	1													0.000915977	5	4.22778e-05	1			3.01301e-05	1													2.10884e-05	1	3.24944e-05	1
arcog	arCOG05093		0.000726334	6	0.00049683	6			0.000504088	4	0.000346302	4	0.00103914	12	0.00262105	7	0.00021379	3	0.000292605	8	0.00101129	7	0.000651799	5	0.000610199	8	0.00149234	6	0.00111928	9	0	0	0.00019025	4	0.00109395	9	0.00019806	5	0.0016911	13	0.000112668	3	0.0024789	19	0.000376536	3	0.00101488	8
arcog	arCOG11376						3.81317e-05	1					1.92191e-05	1							0.00215185	5					0.000603095	4															0.000383397	3					3.62955e-05
arcog	arCOG12623																				0.000285447	2
arcog	arCOG12634																				0.00342901	4					2.3353e-05	1			0.00027833	1									0.000198689	2	0	0
arcog	unannotated		0.999274	3003	0.999451	4521	0.997813	4090	0.99854	3752	0.999654	2824	0.997975	4354	0.997379	3168	0.999786	3159	0.999626	3856	0.914935	2456	0.996203	3194	0.99939	2887	0.994302	3619	0.998875	3228	0.984794	1758	0.999574	3792	0.998706	3585	0.999509	4391	0.99674	4109	0.998408	3875	0.987282	5133	0.999601	3576	0.998927	3858	0.998607
cazy	GH31	glycoside hydrolase family 31							0	0									0.000114459	1											0.000828288	3							0.000117883	2
cazy	GT4	glycosyltransferase family 4			0	0							0.000310332	1			2.03365e-05	1	2.27487e-05	1	0.00129163	1	0.0001156	1	0.000107291	1					0.000176587	1	3.45648e-05	1	0	0											0.0005583	3
cazy	GT5	glycosyltransferase family 5	0.000430196	2	6.50054e-05	2															3.71077e-05	1			7.2903e-05	1							0.000146962	2											0	0	7.7211e-05	1	0.000197141
cazy	unannotated		0.999452	3005	0.999653	4521	0.998676	4104	0.998789	3754	0.999536	2825	0.99969	4374	0.999505	3173	0.998601	3157	0.998908	3857	0.997954	2635	0.999869	3218	0.998117	2887	0.999585	3664	0.999623	3232	0.997958	1774	0.999625	3794	0.999692	3595	0.999476	4392	0.999187	4135	0.999644	3892	0.999968	5206	0.999555	3575	0.999016	3860	0.999596
cog	B	Chromatin Structure and dynamics	0.0548923	176	0.0820889	298	0.0795219	286	0.102161	308	0.0406849	165	0.106394	415	0.0634257	197	0.0322091	142	0.101546	317	0.11378	232	0.0415492	199	0.0406526	187	0.0590804	221	0.043474	182	0.0264636	84	0.0952938	300	0.0680086	238	0.0574714	295	0.116084	390	0.0513376	248	0.129511	454	0.0582088	208	0.0582845	270	0.0356727
cog	C	Energy production and conversion	0.0479387	120	0.0488271	219	0.0656909	222	0.0747271	216	0.0413098	133	0.0459924	164	0.0576983	183	0.0501955	145	0.0394662	139	0.118464	201	0.0637087	193	0.0377236	108	0.0671002	205	0.0443109	149	0.0943171	140	0.0647434	199	0.0596788	134	0.031241	155	0.0685909	236	0.0574409	200	0.0572558	236	0.0590651	212	0.0457926	165	0.0564758
cog	D	Cell cycle control and mitosis	0.0198835	36	0.006828	32	0.0068589	29	0.00737314	22	0.020512	39	0.00673943	30	0.00745493	26	0.0232094	65	0.00629415	41	0.0284622	37	0.0162934	34	0.00818801	27	0.0133266	47	0.00916855	28	0.00570056	14	0.00600577	28	0.0151502	48	0.0132526	50	0.0167455	56	0.0192851	57	0.00845765	46	0.0115006	37	0.0061331	22	0.0124495
cog	E	Amino Acid metabolis and transport	0.00558994	40	0.0136077	109	0.0225457	96	0.0155984	78	0.00727127	46	0.00676589	57	0.00884889	70	0.0143983	80	0.00719491	52	0.0145752	53	0.0210521	87	0.00412535	36	0.0203599	98	0.00703364	66	0.021775	56	0.0102232	65	0.00387644	40	0.01081	85	0.0160036	99	0.0129465	95	0.00924854	76	0.0153375	77	0.0056011	48	0.00809221
cog	F	Nucleotide metabolism and transport	0.00263396	18	0.00314207	40	0.00526402	45	0.00225288	16	0.00273983	13	0.00170683	15	0.00329663	28	0.00416561	31	0.0012158	19	0.00848504	32	0.00169538	17	0.000966994	7	0.00253765	21	0.00275887	15	0.0111237	32	0.00139449	18	0.00140128	10	0.00220324	34	0.00374724	48	0.00302703	44	0.00196804	30	0.0164215	37	0.00225578	20	0.00316
cog	G	Carbohydrate metabolism and transport	0.119702	238	0.0886619	362	0.0889569	343	0.0538038	212	0.137905	261	0.0840833	314	0.106052	263	0.12876	310	0.0608527	213	0.0640723	158	0.0957125	284	0.114925	228	0.106024	295	0.0828821	281	0.094555	158	0.0996701	293	0.0670206	228	0.0910764	346	0.0909873	314	0.0957757	325	0.076908	357	0.100913	306	0.109458	300	0.114242
cog	H	Coenzyme metabolis	0.0047693	38	0.00423473	38	0.00424843	30	0.00445056	30	0.00577947	35	0.00183848	16	0.0034486	24	0.00294475	26	0.00141587	27	0.00388232	25	0.00148746	18	0.000756671	12	0.00700769	53	0.000950021	17	0.0224593	32	0.00206102	23	0.00118319	19	0.00277043	40	0.00257731	30	0.00225022	30	0.003805	47	0.00471915	30	0.00178269	24	0.00298354
cog	I	Lipid metabolism	0.0165633	61	0.0330073	124	0.033294	99	0.0224361	87	0.0244512	52	0.0117447	56	0.0350299	86	0.0321953	85	0.00982922	56	0.0299696	69	0.0307499	86	0.019172	65	0.0150326	86	0.0185213	68	0.0369315	55	0.0238504	96	0.0288544	72	0.0149814	76	0.0175647	86	0.0395321	99	0.0190122	111	0.021107	80	0.0193461	80	0.0247798
cog	J	Tranlsation	0.413166	1252	0.474502	1900	0.476954	1785	0.438361	1626	0.429173	1144	0.489222	2017	0.392889	1247	0.365289	1178	0.545226	1822	0.312817	977	0.456649	1365	0.428692	1301	0.423233	1497	0.40959	1445	0.312377	578	0.410517	1472	0.478295	1639	0.513076	2006	0.370863	1621	0.430536	1557	0.432605	2225	0.446429	1480	0.46274	1687	0.463303
cog	K	Transcription	0.0470428	121	0.0395035	189	0.0294419	148	0.0359647	127	0.0479416	121	0.0369453	156	0.0439281	121	0.0489549	133	0.0419478	141	0.0385803	110	0.0509186	140	0.0629431	99	0.0511627	147	0.0324645	106	0.0373019	59	0.0588447	181	0.0430457	148	0.0444985	177	0.0499992	181	0.0515881	173	0.045832	211	0.0507025	153	0.0420654	172	0.0365864
cog	L	Replication and repair	0.000133645	3	0.000854189	9	0.00159057	13	0.000458121	7	0.000101256	2	0.000477391	5	0.000959718	12	0.000563666	7	0.000413115	9	0.00239588	7	0.000476155	5	0.000411249	5	0.000150622	3	0.000658904	7	0.00416197	4	0.000503837	6	0.00191656	6	0.000161266	6	0.00295561	12	0.000578192	9	0.00210646	16	0.000334504	4	0.0010591	8	0.0012718
cog	M	Cell wall/membrane/envelop biogenesis	0.00124035	12	0.00143876	22	0.0016469	13	0.00596547	31	0.00209499	13	0.00134417	18	0.00358207	34	0.00136538	22	0.00101621	18	0.00301294	11	0.00472291	23	0.00153643	14	0.00106623	9	0.0009323	15	0.00447706	19	0.00247691	27	0.00102132	16	0.00295233	28	0.00403992	36	0.00309915	36	0.00263812	29	0.00272855	18	0.00442213	28	0.00608189
cog	N	Cell motility	0.000299751	5	2.17429e-05	2	0.00119214	4	7.87258e-05	1	0.000803786	1	0.000106189	2	0.00051797	3	0.000153865	4	1.68521e-05	1	6.20964e-05	1	0	0	0.000301533	3	0.00279824	8	0.00107363	4	0.000357986	5	9.98915e-05	4	0	0	0.000473129	6	0.000189743	2	0.000116652	3	0.000107181	4	0.000432487	5	2.80273e-05	1	7.719e-05
cog	O	Post-translational modification, protein turnover, chaperone functions	0.114102	263	0.0653646	294	0.0457	262	0.0685947	263	0.0952516	232	0.0547359	235	0.0968509	241	0.112505	281	0.075134	255	0.0928951	214	0.0849408	237	0.0677363	192	0.0767895	256	0.0733772	220	0.113258	203	0.0723035	284	0.0793436	234	0.0814043	301	0.0689864	257	0.0864193	272	0.0387655	229	0.067779	248	0.072177	273	0.0959327
cog	P	Inorganic ion transport and metabolism	0.0318012	78	0.0317941	113	0.0219348	105	0.054976	134	0.0582798	125	0.0586132	187	0.052447	122	0.0644255	125	0.0154461	93	0.0118516	39	0.00855011	37	0.0391428	97	0.037698	114	0.031168	105	0.0344178	43	0.0470566	142	0.0304005	111	0.0444615	157	0.0336158	136	0.0255203	88	0.044186	184	0.0415213	118	0.0365388	129	0.034185
cog	Q	Secondary Structure	0.0348039	53	0.0344706	107	0.0417822	93	0.0515891	99	0.0268554	64	0.0275323	60	0.0267898	61	0.0262278	53	0.0317308	65	0.0893141	97	0.0382312	83	0.0246554	43	0.0438632	79	0.0304177	70	0.0383316	47	0.0490007	88	0.0453936	81	0.0198217	69	0.044746	95	0.0317038	78	0.0366413	107	0.030022	91	0.0355033	83	0.030914
cog	R	General Functional Prediction only	0.00682978	59	0.0132428	82	0.018028	95	0.0084295	68	0.00589914	50	0.0048506	61	0.0101843	62	0.00832953	58	0.00576186	63	0.0114827	49	0.0118761	62	0.00328602	34	0.00759219	62	0.00917336	70	0.0186739	34	0.00512097	56	0.00493687	48	0.00660327	78	0.0055388	66	0.00978271	63	0.0115884	91	0.00808788	53	0.00556547	51	0.0158978
cog	S	Function Unknown	0.00378303	30	0.00451771	64	0.00357414	41	0.00430241	44	0.00638635	32	0.00500957	45	0.00352969	32	0.00175473	16	0.00261025	33	0.00430751	26	0.0041892	25	0.00226958	21	0.0034506	29	0.00157924	28	0.00349815	13	0.00449769	41	0.00264117	35	0.0050635	49	0.00509684	36	0.00578726	48	0.00477174	69	0.00520733	37	0.002663	35	0.00331302
cog	T	Signal Transduction	0.107332	197	0.0754316	271	0.0736339	223	0.0420274	143	0.128583	205	0.0741269	250	0.096359	198	0.109851	206	0.0521782	166	0.0486008	89	0.083227	223	0.106713	204	0.0904293	229	0.0682999	188	0.0791833	108	0.0969784	264	0.0701082	237	0.0788675	276	0.0757519	231	0.0853737	264	0.0665176	273	0.0803288	230	0.104189	269	0.0983177
cog	U	Intracellular trafficing and secretion	0.00163088	16	0.0010624	22	0.000757904	13	0.000589175	12	0.00131284	14	0.00463912	32	0.00194422	21	0.00227234	25	7.01794e-05	4	0.000353622	1	0.00100358	11	0.00363069	14	0.00102501	14	0.00143115	16	0.00129429	10	0.000400545	8	0.00133006	17	0.00091073	13	0.000286546	8	0.00112326	20	0.000687931	18	0.000836312	14	0.00091152	17	0.00157753
cog	V		0.00543536	32	0.00513682	39	0.00413988	32	0.00182446	19	0.00789564	29	0.00640403	28	0.00768229	29	0.0029131	20	0.00532582	30	0.0060046	22	0.0040405	19	0.00592242	16	0.00514626	31	0.00482209	27	0.00420359	14	0.014316	47	0.0052048	24	0.00322493	28	0.016906	57	0.00431251	30	0.00749644	55	0.0133734	54	0.00438426	37	0.00398037
cog	W																2.06129e-05	1	8.42035e-05	1											0.000180967	3							0.000483705	5									8.9112e-05
cog	X	Trans-activation protein X	5.24771e-05	2	0.000261197	3	0.000122015	2	7.16895e-05	1	0.000136981	4			7.1585e-05	2	3.94391e-05	1	6.02748e-05	2	0.00241291	5			0	0	0	0	4.09635e-05	1	0.000687484	1	7.23908e-05	2	0.000141598	3	0.000386224	2	0.000111544	2			0.000296862	3			0.00011762	2	0.000198929
cog	Z	Cytoskeleton					0.000876318	1									0.000973615	5					0.000743379	1			0.00350947	9									0	0	3.54253e-05	1					1.31283e-05	1			0.000268153
cog	unannotated		0.112985	472	0.0916541	632	0.101641	494	0.10664	521	0.0812429	372	0.0833493	571	0.115584	435	0.106091	437	0.0872978	588	0.143635	421	0.10601	409	0.168232	457	0.106467	531	0.233564	436	0.156929	260	0.101815	569	0.114317	546	0.0799862	538	0.136574	566	0.106474	537	0.114179	788	0.0940548	459	0.125751	550	0.0844688
enzyme_ec	0.2.1		0.00636866	14							0.0023322	6					0.00200318	8							0.0285272	23			0.00250902	4	0.0020447	9							0.0065186	18							0.0448246	39
enzyme_ec	1.1.1.-		0.000234106	3	2.58201e-05	2					4.78235e-05	1			0	0	0.000456421	4					0.000149219	2	9.46347e-05	2			0.000496675	6			0.00024352	1	0	0	9.48183e-05	2	6.79912e-05	1			0.000159309	2	2.90334e-05	1	5.71362e-05	2
enzyme_ec	1.1.1.14	oxidoreductases acting on the ch-oh group of donors with nad+ or nadp+ as acceptor l-iditol 2-dehydrogenase					0.000186681	1	0.000104206	1													8.86974e-05	1											0	0	0	0
enzyme_ec	1.1.1.157	oxidoreductases acting on the ch-oh group of donors with nad+ or nadp+ as acceptor 3-hydroxybutyryl-coa dehydrogenase			0.00349538	2	0.00325653	1	0.00153045	1	0.00600191	1	0.000947432	1	0.00708404	1	0.00742041	2			0.000897322	2			0.000235465	2	0.000238432	1	0.00448421	1	0.00478946	2	7.23253e-05	2	0.00274191	1	7.78158e-05	1	0.00268381	2	0.00289699	2	0.00163737	1					0.00424605
enzyme_ec	1.1.1.193	oxidoreductases acting on the ch-oh group of donors with nad+ or nadp+ as acceptor 5-amino-6-(5-phosphoribosylamino)uracil reductase	0.000111053	2
enzyme_ec	1.1.1.304	oxidoreductases acting on the ch-oh group of donors with nad+ or nadp+ as acceptor diacetyl reductase [(s)-acetoin forming]	4.57428e-05	1	2.01979e-05	1					4.78235e-05	1					4.07213e-05	1															0.00024352	1	0	0	6.10421e-05	1							2.90334e-05	1
enzyme_ec	1.1.1.399	oxidoreductases acting on the ch-oh group of donors with nad+ or nadp+ as acceptor 2-oxoglutarate reductase	0.000126153	1	3.30423e-05	1	0.000226377	1																											0	0	2.6451e-05	1	5.99683e-05	1	0.000336045	4			0	0
enzyme_ec	1.1.1.414	oxidoreductases acting on the ch-oh group of donors with nad+ or nadp+ as acceptor l-galactonate 5-dehydrogenase																											9.90287e-05	2	0	0	8.08341e-05	2					0.00016405	1
enzyme_ec	1.1.1.42	oxidoreductases acting on the ch-oh group of donors with nad+ or nadp+ as acceptor isocitrate dehydrogenase (nadp+)									2.20191e-05	1									0.000164644	1					0	0											0.000140533	2	9.35487e-05	1							6.14975e-05
enzyme_ec	1.1.1.6	oxidoreductases acting on the ch-oh group of donors with nad+ or nadp+ as acceptor glycerol dehydrogenase													7.9382e-05	1	0.000100158	1			0.000402323	2	0	0							4.2481e-05	1							5.07641e-05	1							0.00010819	1	5.77333e-05
enzyme_ec	1.1.1.61	oxidoreductases acting on the ch-oh group of donors with nad+ or nadp+ as acceptor 4-hydroxybutyrate dehydrogenase	3.00064e-05	1									1.73113e-05	1																													4.7063e-05	1
enzyme_ec	1.1.1.76	oxidoreductases acting on the ch-oh group of donors with nad+ or nadp+ as acceptor (s,s)-butanediol dehydrogenase	4.57428e-05	1	2.01979e-05	1					4.78235e-05	1					4.07213e-05	1															0.00024352	1	0	0	6.10421e-05	1							2.90334e-05	1
enzyme_ec	1.1.1.86	oxidoreductases acting on the ch-oh group of donors with nad+ or nadp+ as acceptor ketol-acid reductoisomerase (nadp+)	0.00132545	6	0.000815018	5	0.00151853	5	0.000314243	1	0.00131623	9	0.000534829	4	0.000842709	4	0.000702422	5	7.0397e-05	1	0.000135579	1	0.000551629	6			0.00262215	12			0.00157137	9	1.59092e-05	1	0	0	0.000850593	7	0.000507141	3	0.000459549	3	0.00171391	8	0.0033425	10	0.00013098	2	0.000217414
enzyme_ec	1.1.1.95	oxidoreductases acting on the ch-oh group of donors with nad+ or nadp+ as acceptor phosphoglycerate dehydrogenase	0.000126153	1	3.30423e-05	1	0.000226377	1																											0	0	2.6451e-05	1	5.99683e-05	1	0.000336045	4			0	0
enzyme_ec	1.11.1.26	oxidoreductases acting on a peroxide as acceptor peroxidases nadh-dependent peroxiredoxin			1.93659e-05	1			5.96179e-05	2							0	0	0.00016805	1	0.000331065	1					0	0			0.000131874	1	8.97051e-05	1	0.000455212	1			0.000339053	2	0	0			0.000215221	2			8.81144e-05
enzyme_ec	1.15.1.2	oxidoreductases acting on superoxide as acceptor acting on superoxide as acceptor (only sub-subclass identified to date) superoxide reductase	0.000208379	4	9.16348e-05	3	0	0			0.000100828	1	0	0	0.00154004	6	0.00059304	4			0.000351801	3	0.000329198	1			0.00083404	2			0.00117482	2	0.000110094	1	4.52389e-05	2	0.000227816	3	0.00251015	5	0.00151027	2	2.63695e-05	1	0.000142071	1	1.04033e-05	1
enzyme_ec	1.2.1.12	oxidoreductases acting on the aldehyde or oxo group of donors with nad+ or nadp+ as acceptor glyceraldehyde-3-phosphate dehydrogenase (phosphorylating)	0.00137878	5	0.00133978	5	0.00156111	9	0.00124843	7	0.000736631	4	0.00172217	6	0.00092265	6	0.0011693	7	0.00157717	5	0.000904412	2	0.00107574	3	0.00129319	6	0.00253184	4	0.00125187	7	0.00114471	2	0.00127076	7	0.000153105	2	0.00281499	3	0.00178888	5	0.00139606	6	0.00160274	8	0.00504009	7	0.000282821	1	0.0020116
enzyme_ec	1.2.1.87	oxidoreductases acting on the aldehyde or oxo group of donors with nad+ or nadp+ as acceptor propanal dehydrogenase (coa-propanoylating)																																					0.000110552	2									0.000228368
enzyme_ec	1.2.7.-		0	0	0.00100867	5	0.00190923	11	0.000299304	3	0.00638412	8	0.00710075	15	0.00593329	10	0.00512924	9	0.00242261	12	0.00186209	9	0.00607267	14	0.00300127	7	0.00255352	8	0.00292044	7	0.00480147	4	4.1731e-05	1	0.00515611	5	0.00176351	11	0.000470186	5	0.000580201	6	0.0011332	8	0.00265688	8	0.000459607	9	0.000901001
enzyme_ec	1.2.7.1	oxidoreductases acting on the aldehyde or oxo group of donors with an iron-sulfur protein as acceptor pyruvate synthase	0.000127218	1	0.00113183	8	0.00210897	13	0.000299304	3	0.00638412	8	0.00710075	15	0.00593329	10	0.00517386	10	0.00242261	12	0.00211104	11	0.00624583	15	0.00300127	7	0.00255352	8	0.00295458	8	0.00480147	4	0.000400719	4	0.00515611	5	0.00177531	12	0.000930766	9	0.000580201	6	0.0011332	8	0.00265688	8	0.000459607	9	0.000911801
enzyme_ec	1.2.7.3	oxidoreductases acting on the aldehyde or oxo group of donors with an iron-sulfur protein as acceptor 2-oxoglutarate synthase	0.000224064	3	0.000875309	8	0.00146843	9	0.00316462	16			0.000181952	4	0.000334182	3	0.000209264	1	6.54643e-05	2	0.00166538	4	0.000348124	2	0	0	0.00141013	7	8.73243e-05	1	0.00373092	6	0.00172258	10	0.000381549	3	7.48972e-05	3	0.00149171	9	0.00468858	12	0.00148227	10	3.16644e-05	1	0.00032049	3	0.000330132
enzyme_ec	1.2.7.4	oxidoreductases acting on the aldehyde or oxo group of donors with an iron-sulfur protein as acceptor anaerobic carbon monoxide dehydrogenase			0.000112952	1	0.00111259	2																											0.000407629	1			7.19876e-05	1			0.000488723	1
enzyme_ec	1.2.7.5	oxidoreductases acting on the aldehyde or oxo group of donors with an iron-sulfur protein as acceptor aldehyde ferredoxin oxidoreductase			3.66742e-05	1			2.56771e-05	1																									6.51464e-05	1
enzyme_ec	1.21.4.1	oxidoreductases catalysing the reaction x-h + y-h = x-y with a disulfide as acceptor d-proline reductase																									2.4821e-05	1
enzyme_ec	1.3.1.108	oxidoreductases acting on the ch-ch group of donors with nad+ or nadp+ as acceptor caffeoyl-coa reductase	0.000104113	2	9.2073e-05	1	0.000829716	7	0.0013531	10	0.00027317	2	0.000453875	7	0.00145326	6	0.0035923	13	0.000128501	3	0.00430967	4	0.0023311	11	0.00210183	9	0.000775653	5	0.000395606	1	0.0044044	9	2.6813e-05	1	0.00120262	5	0.000361169	4	0.000362063	4	0.00142487	9	0.00189051	8	0.00108623	6			0.00199419
enzyme_ec	1.3.5.1	oxidoreductases acting on the ch-ch group of donors with a quinone or related compound as acceptor succinate dehydrogenase	1.40882e-05	1					0.000807677	1																																	9.49567e-05	1			9.74284e-05	1
enzyme_ec	1.4.1.4	oxidoreductases acting on the ch-nh2 group of donors with nad+ or nadp+ as acceptor glutamate dehydrogenase (nadp+)	0.000127426	1	0.00152819	17	0.00498064	12	0.00383475	12	0.000702356	6	0.000296994	5	0.000799025	8	0.00147889	13	0.000154758	3	0.00105655	5	0.00602374	15	0.000222879	4	0.00218778	12	0.000911375	7	0.00289908	4	0.000403799	6	0.000157885	4	0.00236669	16	0.00155336	16	0.00198121	13	0.000717533	10	0.00171675	13	1.46946e-05	1	0.000705069
enzyme_ec	1.5.1.2	oxidoreductases acting on the ch-nh group of donors with nad+ or nadp+ as acceptor pyrroline-5-carboxylate reductase	0.000266677	2			5.38209e-05	1																					2.12201e-05	1	8.29555e-05	1									0.000142085	1					1.70695e-05	1
enzyme_ec	1.5.1.20	oxidoreductases acting on the ch-nh group of donors with nad+ or nadp+ as acceptor methylenetetrahydrofolate reductase [nad(p)h]															8.06517e-05	1									4.30286e-05	1											0.000128822	1					0.000239796	1
enzyme_ec	1.8.1.22	oxidoreductases acting on a sulfur group of donors with nad+ or nadp+ as acceptor dissimilatory sulfite reductase system
enzyme_ec	1.8.98.1	oxidoreductases acting on a sulfur group of donors with other, known, physiological acceptors dihydromethanophenazine:cob-com heterodisulfide reductase																															0.000968433	5	0	0							0.000204447	1
enzyme_ec	2.1.1.245	transferases transferring one-carbon groups methyltransferases 5-methyltetrahydrosarcinapterinâ€”corrinoid/iron-sulfur protein co-methyltransferase	0.00214166	4					0.000115487	2													0.00204231	6			0.00129118	7	0.000496065	3									0.000175405	3			0.000233053	2
enzyme_ec	2.1.1.72	transferases transferring one-carbon groups methyltransferases site-specific dna-methyltransferase (adenine-specific)	0	0																																			2.19902e-05	1									5.61192e-05
enzyme_ec	2.1.2.3	transferases transferring one-carbon groups hydroxymethyl-, formyl- and related transferases phosphoribosylaminoimidazolecarboxamide formyltransferase							5.72897e-05	1									1.63046e-05	1	0.000403938	3					0.000187355	2	3.76373e-05	1	0.000320392	2			0	0	7.1872e-05	1			0.000413658	2			6.05058e-05	1	0.000185072	2
enzyme_ec	2.1.3.15	transferases transferring one-carbon groups carboxy- and carbamoyltransferases acetyl-coa carboxytransferase																																							0	0
enzyme_ec	2.2.1.1	transferases transferring aldehyde or ketonic groups transketolases and transaldolases transketolase							1.96905e-05	1																																							0.000243603
enzyme_ec	2.2.1.6	transferases transferring aldehyde or ketonic groups transketolases and transaldolases acetolactate synthase			3.35647e-05	1											0.000261304	2			8.46556e-05	1							3.80449e-05	1			2.04667e-05	1							2.05605e-05	1
enzyme_ec	2.3.1.1	transferases acyltransferases transferring groups other than aminoacyl groups amino-acid n-acetyltransferase							6.58502e-05	1					1.01021e-05	1											1.12343e-05	1
enzyme_ec	2.3.1.169	transferases acyltransferases transferring groups other than aminoacyl groups co-methylating acetyl-coa synthase	5.69956e-05	1	0.000545718	3					0.000649719	4	0	0	0.00271732	6	0.00130786	3			0.000228639	1			2.77895e-05	1			2.70224e-05	1			0.000579539	5	0	0	0.000129573	1	0.000143983	3	0.000380905	4	0.000632285	4	0.00016087	2			0.000293485
enzyme_ec	2.3.1.222	transferases acyltransferases transferring groups other than aminoacyl groups phosphate propanoyltransferase
enzyme_ec	2.3.1.247	transferases acyltransferases transferring groups other than aminoacyl groups (5s)-5-amino-3-oxohexanoate:acetyl-coa ethylamine transferase	4.80507e-05	1					0.000179535	2													0	0	0.000795255	4	6.89416e-05	2			9.71366e-05	1			2.51244e-05	1	0.000263343	3	0.00013428	1
enzyme_ec	2.3.1.263	transferases acyltransferases transferring groups other than aminoacyl groups 2-amino-4-oxopentanoate thiolase							0.000146561	1											0.0005739	2	0	0							0.00015055	1	0.000441732	3					9.41997e-05	1	0	0	0.000320119	3			6.78301e-05	1	0
enzyme_ec	2.3.1.266	transferases acyltransferases transferring groups other than aminoacyl groups [ribosomal protein bs18]-alanine n-acetyltransferase											0.000190542	1
enzyme_ec	2.3.1.35	transferases acyltransferases transferring groups other than aminoacyl groups glutamate n-acetyltransferase							6.58502e-05	1					1.01021e-05	1											1.12343e-05	1
enzyme_ec	2.3.1.54	transferases acyltransferases transferring groups other than aminoacyl groups formate c-acetyltransferase	0.000921518	4	0.00138457	8	0.00248461	12	0.00102713	4	0.000117375	2	0.00138722	5	0.00181587	8	0.00113151	4	0.000259895	3	0.000625825	2	0.000526573	3	0.000464537	3	0.00297529	6	0.000654679	4	0.00112169	3	0.00255237	7	0.000534399	4	0.000950718	9	0.00157607	8	0.000988707	6	0.00560554	15	0.00167711	7	0.00291482	8	0.00235904
enzyme_ec	2.3.1.8	transferases acyltransferases transferring groups other than aminoacyl groups phosphate acetyltransferase			0.000158742	1	0.000131087	1	0.000139573	1	0.000880717	5			2.36934e-05	1	5.59448e-05	1	0.000339954	2	0.000281486	3			0.000290162	3	0	0			0	0							0.00153407	2	1.54096e-05	1	8.74024e-05	2	0.00129243	4			0
enzyme_ec	2.3.3.5	transferases acyltransferases acyl groups converted into alkyl groups on transfer 2-methylcitrate synthase			1.76736e-05	1			0.000245182	2																	1.2492e-05	1			0.000149454	1					5.95299e-05	1
enzyme_ec	2.4.1.21	transferases glycosyltransferases hexosyltransferases starch synthase (glycosyl-transferring)	0.000430196	2	6.50054e-05	2															3.71077e-05	1			7.2903e-05	1							0.000146962	2											0	0	7.7211e-05	1	0.000197141
enzyme_ec	2.4.2.9	transferases glycosyltransferases pentosyltransferases uracil phosphoribosyltransferase	0.000257202	2	3.5331e-05	1	0.000124102	2							1.17389e-05	1	0.000187331	1	3.46048e-05	1			0.000293892	2			0.000733447	3	0.000150423	2	0.000162701	1	0.000130707	1	0	0	0.000134125	1	0.000190737	3	2.71818e-05	1			0	0	0.000153158	3
enzyme_ec	2.5.1.49	transferases transferring alkyl or aryl groups, other than methyl groups transferring alkyl or aryl groups, other than methyl groups (only sub-subclass identified to date) o-acetylhomoserine aminocarboxypropyltransferase					0.000409727	2	6.97097e-05	2																					0	0					0.000117039	1			0.000279189	3	2.49143e-05	1					0.000428318
enzyme_ec	2.5.1.6	transferases transferring alkyl or aryl groups, other than methyl groups transferring alkyl or aryl groups, other than methyl groups (only sub-subclass identified to date) methionine adenosyltransferase							9.36397e-05	1	7.62146e-05	1			0.000186248	3	0.000139069	1									0.000162968	2													0.000173867	2	5.06768e-05	1	0.000127546	1	8.58478e-05	1
enzyme_ec	2.6.1.-																						5.93304e-05	1
enzyme_ec	2.6.1.16	transferases transferring nitrogenous groups transaminases glutamineâ€”fructose-6-phosphate transaminase (isomerizing)																																			0.000132478	1
enzyme_ec	2.6.1.42	transferases transferring nitrogenous groups transaminases branched-chain-amino-acid transaminase			0.000196974	4	9.75683e-05	1	0	0	0.000318099	2									0.000179305	2					2.80718e-05	1			0.000243891	1					5.14788e-05	1			9.76968e-05	1
enzyme_ec	2.6.1.52	transferases transferring nitrogenous groups transaminases phosphoserine transaminase	3.85663e-05	1	0.00032444	4	5.08026e-05	1	0.000634195	4			0.000602335	2	8.90318e-05	1	9.46254e-05	1			0.000901452	4	0	0	1.31635e-05	1	0.00065822	1					1.17726e-05	1	8.70124e-05	2	5.73506e-05	2	0.000221695	2	0.00012699	1	0.000278814	4	0	0	0.000451965	5	0.000280937
enzyme_ec	2.7.1.191	transferases transferring phosphorus-containing groups phosphotransferases with an alcohol group as acceptor protein-nÏ€-phosphohistidineâ€”d-mannose phosphotransferase											7.47672e-05	1	0.000129639	3			6.30867e-05	1															0.000290607	3			3.90208e-05	1							0.000129782	1	4.92293e-05
enzyme_ec	2.7.1.193	transferases transferring phosphorus-containing groups phosphotransferases with an alcohol group as acceptor protein-nÏ€-phosphohistidineâ€”n-acetyl-d-glucosamine phosphotransferase																											2.47903e-05	1
enzyme_ec	2.7.1.194	transferases transferring phosphorus-containing groups phosphotransferases with an alcohol group as acceptor protein-nÏ€-phosphohistidineâ€”l-ascorbate phosphotransferase	0.000414489	4	0.000307745	5	0.000272544	4	7.59476e-05	1	2.26796e-05	1	0.000295919	5	0.000375278	4	0.000146324	3	0.000323934	4	0.000632645	4	0.0002008	1	0.00103676	8	0.000238124	4	0.000353765	8	0.000300719	2	9.45543e-05	4	0.000104676	3	0.000324199	5	0.000213028	3	4.74731e-05	1	0.00049335	7	0.000288418	3	0.000286742	6	0.000493328
enzyme_ec	2.7.1.196	transferases transferring phosphorus-containing groups phosphotransferases with an alcohol group as acceptor protein-nÏ€-phosphohistidineâ€”n,nâ€²-diacetylchitobiose phosphotransferase			3.59582e-05	1			0.00036146	3			0.00116044	7	0.00197832	6	0.00130503	5	0.00195325	5	0.00192346	5	0.000766584	3	0.00126545	5			0.000641769	6	0.000503356	1					0.00145033	8					0.000409123	4	0.00261111	10			0.0019152
enzyme_ec	2.7.1.205	transferases transferring phosphorus-containing groups phosphotransferases with an alcohol group as acceptor protein-nÏ€-phosphohistidineâ€”cellobiose phosphotransferase			3.59582e-05	1			0.00036146	3			0.00116044	7	0.00197832	6	0.00130503	5	0.00195325	5	0.00192346	5	0.000766584	3	0.00126545	5			0.000641769	6	0.000503356	1					0.00145033	8					0.000409123	4	0.00261111	10			0.0019152
enzyme_ec	2.7.1.90	transferases transferring phosphorus-containing groups phosphotransferases with an alcohol group as acceptor diphosphateâ€”fructose-6-phosphate 1-phosphotransferase			0.000569802	7			0.000242153	1	6.4843e-05	1	3.60795e-05	2			0.00113961	6	0.00012977	2									0.000513479	4	0	0	2.02966e-05	1	2.07151e-05	1	3.81445e-05	1	9.35267e-05	2	0.000121244	3			2.4151e-05	1			0.000653817
enzyme_ec	2.7.13.3	transferases transferring phosphorus-containing groups protein-histidine kinases histidine kinase			3.03673e-05	1																	4.15306e-05	2							0.000293796	1													6.96287e-05	1			8.93235e-05
enzyme_ec	2.7.2.1	transferases transferring phosphorus-containing groups phosphotransferases with a carboxy group as acceptor acetate kinase	0.000334823	3			0.000505247	6	9.35984e-05	1	0.000135808	1	0.000519938	3	0.000565881	7	0	0	7.79439e-05	3	0.000396769	3	0.000306965	3			0.000781862	7	7.32467e-05	1	0.00124026	4	0.000673194	3	0	0			0.00198637	7	0.000690074	8	0.000369947	3	0.00229468	5	0.000401536	5	0.000142656
enzyme_ec	2.7.2.18	transferases transferring phosphorus-containing groups phosphotransferases with a carboxy group as acceptor fatty acid kinase	0.000495855	3	0.000152713	1	0.000114486	3	0.000377092	2	0.000306161	3	0.000288259	4	0.000288028	4	0.000479758	4	4.99699e-05	1			0.00182188	6	0.000368878	3	0.000189478	2	3.40161e-05	1			0.00036689	6	0.000254344	2	0.000565555	4	0.000164535	4	0.00113172	4	0.000160095	2	9.58536e-05	3	0.000460786	5	0.000228865
enzyme_ec	2.7.2.2	transferases transferring phosphorus-containing groups phosphotransferases with a carboxy group as acceptor carbamate kinase							0.000212631	1	0.000176502	1	9.41008e-05	3			4.06525e-05	1							0.000140691	2	0.000220345	2	0.00049482	2			0	0			0.000413095	2			0.000149579	2
enzyme_ec	2.7.2.3	transferases transferring phosphorus-containing groups phosphotransferases with a carboxy group as acceptor phosphoglycerate kinase	0.00142773	3	9.20819e-05	2	0.000861719	6			0.000152112	2	0.00056168	2	0.00013209	2	0.00014798	1	0.000554461	2			0.000714933	2	0.0026495	6			4.1845e-05	1	0.000331621	2			4.14167e-05	1	6.95189e-05	2	0.000116658	2	0.00013603	1	2.72089e-05	1	0.000423734	3	3.00672e-05	1	4.66655e-05
enzyme_ec	2.7.4.3	transferases transferring phosphorus-containing groups phosphotransferases with a phosphate group as acceptor adenylate kinase	9.72911e-05	1	4.82265e-05	1							3.05085e-05	1			5.68158e-05	1																							0.000181416	4
enzyme_ec	2.7.6.1	transferases transferring phosphorus-containing groups diphosphotransferases ribose-phosphate diphosphokinase																													0.000245916	2					3.83001e-05	1	1.36619e-05	1			6.90889e-05	1					0.000561368
enzyme_ec	2.7.7.38	transferases transferring phosphorus-containing groups nucleotidyltransferases 3-deoxy-manno-octulosonate cytidylyltransferase
enzyme_ec	2.7.7.6	transferases transferring phosphorus-containing groups nucleotidyltransferases dna-directed rna polymerase	0.00292534	22	0.00316238	31	0.00327164	39	0.00311439	23	0.00462898	25	0.00326791	30	0.00333139	22	0.0038457	25	0.001109	14	0.00265717	14	0.00358858	23	0.00172786	16	0.00466217	29	0.00335892	19	0.00104505	6	0.00272764	21	0.00320603	31	0.00586533	39	0.00254555	26	0.00723637	33	0.00370235	42	0.00434855	23	0.00223936	28	0.0032823
enzyme_ec	2.7.7.7	transferases transferring phosphorus-containing groups nucleotidyltransferases dna-directed dna polymerase															2.15392e-05	1			5.6582e-05	1	0.000214395	2													0	0
enzyme_ec	2.8.1.-		0.000224603	4					9.19383e-05	2	7.65914e-05	2	1.65016e-05	1					0.000168247	7			0.000190147	2	3.67498e-05	1	0.000210176	4					0.000180492	3	0.000200839	3	0.000171342	4	8.14054e-05	2	0.000155963	3	0.000124081	2	0.000172089	3	0.000222347	4	4.22968e-05
enzyme_ec	2.8.3.-		2.28673e-05	1							8.54735e-05	2			0	0	2.48639e-05	1	6.74315e-05	1							0.000146123	2			0	0	5.62813e-05	1															0.000257349
enzyme_ec	2.8.3.10	transferases transferring sulfur-containing groups coa-transferases citrate coa-transferase																			0	0																			0.000186743	2
enzyme_ec	2.8.3.17	transferases transferring sulfur-containing groups coa-transferases 3-(aryl)acryloyl-coa:(r)-3-(aryl)lactate coa-transferase							8.03554e-05	1	9.5274e-05	2			0.000200011	2													0.000134528	2									2.42025e-05	1							0.000205183	3
enzyme_ec	3.1.3.-
enzyme_ec	3.1.3.18	hydrolases acting on ester bonds phosphoric-monoester hydrolases phosphoglycolate phosphatase											0.000347037	1							0.000188185	1
enzyme_ec	3.1.3.89	hydrolases acting on ester bonds phosphoric-monoester hydrolases 5â€²-deoxynucleotidase
enzyme_ec	3.2.1.177	hydrolases glycosylases glycosidases, i.e. enzymes that hydrolyse o- and s-glycosyl compounds Î±-d-xyloside xylohydrolase							0	0									0.000114459	1											0.000828288	3							0.000117883	2
enzyme_ec	3.2.1.86	hydrolases glycosylases glycosidases, i.e. enzymes that hydrolyse o- and s-glycosyl compounds 6-phospho-Î²-glucosidase			6.02821e-05	1													2.27487e-05	1					0.000107291	1							3.45648e-05	1	0	0	3.51371e-05	1									0.000306307	1
enzyme_ec	3.4.13.-						3.23664e-05	1					1.50939e-05	1									0.000149423	1	0.000124707	1	5.15724e-05	1
enzyme_ec	3.4.13.4	hydrolases acting on peptide bonds (peptidases) dipeptidases xaa-arg dipeptidase
enzyme_ec	3.4.25.2	hydrolases acting on peptide bonds (peptidases) threonine endopeptidases hsluâ€”hslv peptidase
enzyme_ec	3.5.1.104	hydrolases acting on carbon-nitrogen bonds, other than peptide bonds in linear amides peptidoglycan-n-acetylglucosamine deacetylase																					0.000307046	1																							6.74267e-05	1
enzyme_ec	3.5.1.24	hydrolases acting on carbon-nitrogen bonds, other than peptide bonds in linear amides choloylglycine hydrolase			0.00016678	2	0	0	7.35789e-05	2																																			0	0			0
enzyme_ec	3.5.1.28	hydrolases acting on carbon-nitrogen bonds, other than peptide bonds in linear amides n-acetylmuramoyl-l-alanine amidase																			0.000433753	1
enzyme_ec	3.5.1.5	hydrolases acting on carbon-nitrogen bonds, other than peptide bonds in linear amides urease	0.00111354	3	0.0017923	8	0.00335711	8	0.00326068	6	0.000631957	4	0.00229506	8	0.000575193	3	0.000950752	3	0.00114766	5	0.0054813	7	0.00144425	5	0.000694707	5	0.00225383	6	0.000556814	2	0.000814773	2	0.000583098	3	0.00165171	8	0.000821224	4	0.000884111	3	0.000269967	2	0.000807737	5	0.000540757	4	0.00124246	5	0.0010429
enzyme_ec	3.5.2.2	hydrolases acting on carbon-nitrogen bonds, other than peptide bonds in cyclic amides dihydropyrimidinase																							0	0							0.000163943	1
enzyme_ec	3.5.4.10	hydrolases acting on carbon-nitrogen bonds, other than peptide bonds in cyclic amidines imp cyclohydrolase							5.72897e-05	1							2.28706e-05	1	4.42057e-05	2	0.000403938	3	0.000148074	3			0.000187355	2	3.76373e-05	1	0.000320392	2	2.73887e-05	1	0	0	7.1872e-05	1	0.000159125	1	0.000413658	2			6.05058e-05	1	0.000185072	2
enzyme_ec	3.5.4.16	hydrolases acting on carbon-nitrogen bonds, other than peptide bonds in cyclic amidines gtp cyclohydrolase i																																					0.000139198	1					4.83408e-05	1
enzyme_ec	3.5.4.26	hydrolases acting on carbon-nitrogen bonds, other than peptide bonds in cyclic amidines diaminohydroxyphosphoribosylaminopyrimidine deaminase	0.000111053	2
enzyme_ec	3.7.1.4	hydrolases acting on carbon-carbon bonds in ketonic substances phloretin hydrolase
enzyme_ec	4.1.1.15	lyases carbon-carbon lyases carboxy-lyases glutamate decarboxylase
enzyme_ec	4.1.1.49	lyases carbon-carbon lyases carboxy-lyases phosphoenolpyruvate carboxykinase (atp)					0.000256053	1							0.00108838	2	0.00339579	3			0.00303336	1	0.000598457	3			0.000476198	3													0.00016424	3	9.68092e-05	1	0.00461949	3			5.37466e-05
enzyme_ec	4.1.2.13	lyases carbon-carbon lyases aldehyde-lyases fructose-bisphosphate aldolase	0.000606222	3	0.00103169	6	0.00107962	8	4.15514e-05	1	0.00117764	8	0.000390696	3	0.00232521	12	0.00344629	8			0.000264018	3	0.00127678	7	0.0037588	5	0.00147159	5	1.99399e-05	1	0.000729857	2	0.000205112	3	2.54094e-05	1	0.000124298	1	0.00325609	12	0.00233688	5	0.000281593	5	0.00302236	5	0.00104277	6	0.000136522
enzyme_ec	4.1.2.14	lyases carbon-carbon lyases aldehyde-lyases 2-dehydro-3-deoxy-phosphogluconate aldolase	7.41602e-05	1	6.19366e-05	1	0.000471832	5	0.000218068	3					0.000140759	2	0	0	0.000648214	1			9.46912e-05	1	4.41586e-05	1	0.000317442	4	0.000502092	3			0.000145838	2	0.000587271	2			0.000151386	1	0.000152222	2	0.000116482	2	0.000171887	3			0.000233102
enzyme_ec	4.1.3.42	lyases carbon-carbon lyases oxo-acid-lyases (4s)-4-hydroxy-2-oxoglutarate aldolase	7.41602e-05	1	6.19366e-05	1	0.000471832	5	0.000218068	3					0.000140759	2	0	0	0.000648214	1			9.46912e-05	1	4.41586e-05	1	0.000317442	4	0.000502092	3			0.000145838	2	0.000587271	2			0.000151386	1	0.000152222	2	0.000116482	2	0.000171887	3			0.000233102
enzyme_ec	4.1.3.6	lyases carbon-carbon lyases oxo-acid-lyases citrate (pro-3s)-lyase
enzyme_ec	4.2.1.10	lyases carbon-oxygen lyases hydro-lyases 3-dehydroquinate dehydratase			1.42898e-05	1							0	0	2.56768e-05	1	9.70892e-05	1			0.000458497	4											1.44677e-05	1			0.000171603	2	0.000151443	3	0.000252282	2
enzyme_ec	4.2.1.11	lyases carbon-oxygen lyases hydro-lyases phosphopyruvate hydratase	0.000301976	2	4.48516e-05	1	0.000797783	3			0.000370132	2			0.000502212	2	0.000386625	3			0.000237224	1			4.22924e-05	1	5.70781e-05	2			0.000162814	1	9.49279e-05	1	3.92564e-05	1	6.12113e-05	1	0.000408991	3			0.000230362	4	0.00496696	4	0.000357895	3
enzyme_ec	4.2.1.49	lyases carbon-oxygen lyases hydro-lyases urocanate hydratase					0	0													0	0
enzyme_ec	4.2.1.51	lyases carbon-oxygen lyases hydro-lyases prephenate dehydratase	2.53283e-05	1	3.02088e-05	2	1.45027e-05	1			3.44919e-05	1	1.73286e-05	1					4.43123e-05	2			9.55138e-05	1					7.88827e-05	3									4.86964e-05	1	0.000118622	1	9.58254e-05	2
enzyme_ec	4.2.1.7	lyases carbon-oxygen lyases hydro-lyases altronate dehydratase							8.08542e-05	1			0.000185827	2	4.57338e-05	1	0.000190373	1			0.00030392	1	0.00103879	6			0.000178514	1	0.000163609	2	0.000150769	1	0	0			0.000232674	3	0.000503489	7	0.000509246	5	0.000329381	4	5.43231e-05	1	0.00017155	3	0.000157129
enzyme_ec	4.2.1.85	lyases carbon-oxygen lyases hydro-lyases dimethylmaleate hydratase			0.000131108	2																					0	0	0	0					0	0			0	0
enzyme_ec	4.3.1.19	lyases carbon-nitrogen lyases ammonia-lyases threonine ammonia-lyase																											0.000122882	2															5.43936e-05	1	0.000707682	2	2.47116e-05
enzyme_ec	4.3.3.7	lyases carbon-nitrogen lyases amine-lyases 4-hydroxy-tetrahydrodipicolinate synthase	8.92917e-05	1	7.14781e-05	1	1.72541e-05	1	0.000378131	5			3.47996e-05	1	0.00059129	4	4.57824e-05	1			9.24272e-05	1	1.12411e-05	1							0.000818635	2	0.000100406	2					0.000944202	8	0.00035556	6	5.48957e-05	1	7.51402e-05	2	0.000127076	1
enzyme_ec	4.4.1.24	lyases carbon-sulfur lyases carbon-sulfur lyases (only sub-subclass identified to date) (2r)-sulfolactate sulfo-lyase			8.38368e-05	2															0.00177788	6					0.000301538	4	8.42916e-05	2					6.75719e-05	1			0.00054102	3			1.28592e-05	1					0.000232491
enzyme_ec	4.99.1.3	lyases other lyases sole sub-subclass for lyases that do not belong in the other subclasses sirohydrochlorin cobaltochelatase	0.000747713	3	5.63778e-05	1	3.21831e-05	1	0.000388664	1	8.4846e-05	1	8.53955e-05	2	0.00107816	5	0.000231816	3					0	0	0	0	0.000415293	4	0	0	0.0072486	5	0.000237714	2	0	0			0.000436946	3	0.000141432	2	7.7817e-05	2	0.000104473	2	0.000263509	2	5.78553e-05
enzyme_ec	5.1.3.41	isomerases racemases and epimerases acting on carbohydrates and derivatives fructoselysine 3-epimerase									0.000343516	2											0.000132567	1	7.40658e-05	1			2.25065e-05	1
enzyme_ec	5.3.1.15	isomerases intramolecular oxidoreductases interconverting aldoses and ketoses, and related compounds d-lyxose ketol-isomerase																															5.75664e-05	1
enzyme_ec	5.3.1.25	isomerases intramolecular oxidoreductases interconverting aldoses and ketoses, and related compounds l-fucose isomerase	0.00013199	1	0.000270943	1					0	0					0.000127168	1			0.000104503	1	0.000179284	1	0.00024712	2					0.000795685	2											0.000100031	1
enzyme_ec	5.3.1.3	isomerases intramolecular oxidoreductases interconverting aldoses and ketoses, and related compounds d-arabinose isomerase	0.00013199	1	0.000270943	1					0	0					0.000127168	1			0.000104503	1	0.000179284	1	0.00024712	2					0.000795685	2											0.000100031	1
enzyme_ec	5.3.1.32	isomerases intramolecular oxidoreductases interconverting aldoses and ketoses, and related compounds (4s)-4-hydroxy-5-phosphooxypentane-2,3-dione isomerase	0.00141334	7	0.001681	9	0.000410828	2	0.00150465	6	0.0017364	7	0.00175142	10	0.00435875	11	0.000570305	3	0.0010935	6	0.00257233	9	0.00177532	8	0.000749319	6	0.000808663	4	0.000800003	7	0.000155622	2	0.000911613	9	0.00388526	11	0.000618117	4	0.00224295	13	0.000906065	7	0.000905943	6	0.000644931	6	0.00253927	13	0.000301514
enzyme_ec	5.4.2.10	isomerases intramolecular transferases phosphotransferases (phosphomutases) phosphoglucosamine mutase							0.000224489	1							0	0					0.000217129	1					3.9022e-05	1	0.000102267	1	1.71224e-05	1					0.000168134	2					0.000131619	2
enzyme_ec	5.4.2.11	isomerases intramolecular transferases phosphotransferases (phosphomutases) phosphoglycerate mutase (2,3-diphosphoglycerate-dependent)					8.19066e-05	2																	0.000285524	2																					4.56017e-05	1
enzyme_ec	5.4.99.5	isomerases intramolecular transferases transferring other groups chorismate mutase	2.53283e-05	1	3.02088e-05	2	1.45027e-05	1			3.44919e-05	1	1.73286e-05	1					4.43123e-05	2			9.55138e-05	1					7.88827e-05	3	0.000135402	1							4.86964e-05	1	0.000118622	1	9.58254e-05	2
enzyme_ec	5.4.99.9	isomerases intramolecular transferases transferring other groups udp-galactopyranose mutase					0.000123341	1											0.00022074	3													7.52097e-05	2							8.49822e-06	1
enzyme_ec	5.6.1.7	isomerases isomerases altering macromolecular conformation enzymes altering polypeptide conformation or assembly chaperonin atpase	0.00205243	8	0.000494203	6	0.000125949	3	0.000174175	1					0.000638328	3	0.000592456	8			7.91587e-05	1	0.00118903	8			2.50265e-05	1			0.00200043	8	0.000328671	2			8.47127e-05	4	6.76908e-05	2	0.000150577	3	4.10937e-05	1	0.000132273	2	0.000405527	1	0.000302206
enzyme_ec	6.1.1.13	ligases forming carbon-oxygen bonds ligases forming aminoacyl-trna and related compounds d-alanineâ€”poly(phosphoribitol) ligase	8.14036e-05	1	7.254e-05	1	9.11086e-05	1			0.000213293	1	1.48813e-05	1	7.83675e-05	1	7.84332e-05	1	0	0			0.000661525	4									0.00110744	1	8.68628e-05	1	5.09577e-05	1					6.89152e-05	2			7.2324e-05	1	0.00011631
enzyme_ec	6.1.1.3	ligases forming carbon-oxygen bonds ligases forming aminoacyl-trna and related compounds threonineâ€”trna ligase			0.00013274	2	0.000330305	4	0.000112329	1	0	0			0.000151471	1	0.00019871	2			0.000220623	1	0.000181987	2					0.000148414	1			0.000130849	3	4.12057e-05	1	0.000249086	3	1.50628e-05	1			1.83275e-05	1	8.24368e-05	1	0	0	0.000147831
enzyme_ec	6.3.2.1	ligases forming carbon-nitrogen bonds acidâ€”amino-acid ligases (peptide synthases) pantoateâ€”Î²-alanine ligase (amp-forming)					6.82419e-05	1																																					2.9083e-05	1
enzyme_ec	6.3.2.10	ligases forming carbon-nitrogen bonds acidâ€”amino-acid ligases (peptide synthases) udp-n-acetylmuramoyl-tripeptideâ€”d-alanyl-d-alanine ligase
enzyme_ec	6.3.2.13	ligases forming carbon-nitrogen bonds acidâ€”amino-acid ligases (peptide synthases) udp-n-acetylmuramoyl-l-alanyl-d-glutamateâ€”2,6-diaminopimelate ligase			0.000116392	1																	5.6979e-05	1
enzyme_ec	6.3.2.8	ligases forming carbon-nitrogen bonds acidâ€”amino-acid ligases (peptide synthases) udp-n-acetylmuramateâ€”l-alanine ligase			2.2254e-05	1													0.000165313	2					3.5822e-05	1											1.49834e-05	1	0.000211556	1	7.0556e-05	2							5.29823e-05
enzyme_ec	6.3.3.1	ligases forming carbon-nitrogen bonds cyclo-ligases phosphoribosylformylglycinamidine cyclo-ligase			0.000437924	5	0.000206649	3																			3.73696e-05	1			0	0			1.7044e-05	1	7.37663e-06	1	1.33467e-05	1			6.95702e-05	2			0	0	9.46994e-06
enzyme_ec	6.3.4.13	ligases forming carbon-nitrogen bonds other carbon-nitrogen ligases phosphoribosylamineâ€”glycine ligase			0	0	5.45745e-05	2							0.000469482	2											3.73696e-05	1			9.16333e-05	1							2.15605e-05	1	0.000210149	3			0	0
enzyme_ec	6.3.5.3	ligases forming carbon-nitrogen bonds carbon-nitrogen ligases with glutamine as amido-n-donor phosphoribosylformylglycinamidine synthase					0.000564412	4			0.00114245	4							0.000109089	1	0.00146119	5									7.50121e-05	1			0.000100439	1	0.00021533	3	1.57714e-05	1	0	0	5.94708e-05	2			4.15314e-05	1	0.000495427
enzyme_ec	6.4.1.2	ligases forming carbon-carbon bonds ligases that form carbon-carbon bonds (only sub-subclass identified to date) acetyl-coa carboxylase	0.000333837	1																	0	0													0	0					0	0
enzyme_ec	7.1.2.2	translocases catalysing the translocation of protons linked to the hydrolysis of a nucleoside triphosphate h+-transporting two-sector atpase			2.6586e-05	1	0.000203788	1	8.31612e-05	2	6.95715e-05	1	0.00114062	6	0.000635528	3	8.60142e-05	1	4.56194e-05	2	3.52624e-05	1	0.000395922	3	0	0			2.46521e-05	2	0.00117479	2	0.000142612	2	0	0			9.22235e-05	3	4.50446e-05	1	0.000184359	4	0.000528619	3	0.000104524	1	2.1954e-05
enzyme_ec	7.2.2.1	translocases catalysing the translocation of inorganic cations linked to the hydrolysis of a nucleoside triphosphate na+-transporting two-sector atpase							8.31612e-05	2	6.95715e-05	1			0.000635528	3	8.60142e-05	1	4.56194e-05	2	3.52624e-05	1	0.000395922	3	0	0			2.46521e-05	2			9.33527e-05	1					5.60501e-05	2	4.50446e-05	1	4.01281e-05	2	0.000145153	1
enzyme_ec	7.2.4.3	translocases catalysing the translocation of inorganic cations linked to decarboxylation (s)-methylmalonyl-coa decarboxylase (sodium-transporting)			0.000152849	4	5.04429e-05	2	3.22389e-05	1							0.000267512	4	8.05189e-05	2			0.00058661	5	0.000817233	3	0.000727398	8	0.000167241	2	0.000144342	1	0.000261913	3	0	0	0.000541337	1	0.000102749	2	0.000372233	6	0.000109222	3	0.000726845	5	5.12916e-05	1	8.54139e-05
enzyme_ec	7.5.2.9	translocases catalysing the translocation of carbohydrates and their derivatives linked to the hydrolysis of a nucleoside triphosphate abc-type d-galactofuranose transporter																			4.37703e-05	1					9.47041e-05	1											0.000100344	2
enzyme_ec	7.6.2.-
enzyme_ec	unannotated		0.963321	2794	0.954991	4177	0.94231	3731	0.955589	3507	0.961294	2648	0.967174	4161	0.936526	2878	0.927586	2833	0.98034	3673	0.936152	2409	0.929519	2929	0.93813	2686	0.944618	3363	0.960661	3007	0.889039	1565	0.965737	3526	0.965757	3442	0.969799	4117	0.934922	3731	0.945209	3544	0.960797	4840	0.916316	3273	0.926942	3597	0.956285
go	GO:0000036	acyl carrier activity	0.0133221	39	0.0189299	74	0.0201494	54	0.0156613	56	0.0156974	35	0.00967484	42	0.0194291	52	0.0150797	45	0.00841073	38	0.019232	39	0.0140191	45	0.015097	32	0.0103599	54	0.0101367	44	0.0198868	34	0.0169256	56	0.0185631	48	0.0119676	56	0.00997046	40	0.0185333	57	0.0151	83	0.0105338	44	0.01793	60	0.0149925
go	GO:0000041	transition metal ion transport	0.000301473	3			0.000301166	2	2.40936e-05	1			2.5802e-05	1							0.000110232	1											0.000167314	2	0	0									0.000115107	2
go	GO:0000096	sulfur amino acid metabolic process			0.000653575	2	0.000977405	6	6.97097e-05	2					0.00018612	1	8.06517e-05	1	0.000358809	4	0.000102639	1					0.000803084	5	0.000538705	2	0.000125715	2	4.1914e-05	1			0.00154696	8	0.000249205	2	0.000279189	3	2.49143e-05	1	0.000239796	1	8.72528e-06	1	0.000428318
go	GO:0000097	sulfur amino acid biosynthetic process															8.06517e-05	1	3.66437e-05	1							0.000578304	4			3.358e-05	1					0.000128066	1	0.000249205	2					0.000239796	1	8.72528e-06	1
go	GO:0000104	succinate dehydrogenase activity	1.40882e-05	1					0.000807677	1							4.83211e-05	1			0.000154384	1	0	0																			9.49567e-05	1			9.74284e-05	1
go	GO:0000155	phosphorelay sensor kinase activity			3.03673e-05	1																	4.15306e-05	2							0.000293796	1											9.06449e-06	1	6.96287e-05	1			8.93235e-05
go	GO:0000156	phosphorelay response regulator activity			5.04295e-05	1									0.0012997	3	2.22702e-05	1			0.000375195	3	0.00035213	2	7.43579e-05	1	4.79669e-05	1	0.00102325	2	0.000202466	1	0.000184532	1	3.96932e-05	1					0.000205262	1	0	0	0.00017902	1			0.00029218
go	GO:0000160	phosphorelay signal transduction system			5.04295e-05	1									0.000223505	3	2.67749e-05	1			0.000375195	3	0.000677962	3	7.43579e-05	1	4.79669e-05	1	0.00102325	2	0.000202466	1			0.000492482	1							9.06449e-06	1			3.64211e-05	1	0.00029218
go	GO:0000166	nucleotide binding	0.107392	226	0.065432	242	0.0398525	228	0.0630834	210	0.089634	208	0.0525317	199	0.0892988	200	0.108816	235	0.0712902	198	0.0801982	188	0.080825	207	0.0561049	153	0.0699984	204	0.077766	199	0.115327	183	0.0677892	226	0.0742288	188	0.0812229	262	0.064421	218	0.0833617	232	0.039309	175	0.0832701	226	0.0675251	216	0.097898
go	GO:0000287	magnesium ion binding			3.01768e-05	1	9.06888e-05	1	0.000265633	2			0.000532093	4							0.000452813	2					0	0			0.000245916	2							0.000194297	5			1.61052e-05	1	0.000517793	5			0.000588956
go	GO:0000314	organellar small ribosomal subunit	0.14447	398	0.168217	628	0.145935	554	0.151714	545	0.15392	372	0.168292	670	0.164781	455	0.152745	427	0.182226	542	0.0899403	302	0.168932	488	0.142211	445	0.163384	532	0.135111	481	0.0977009	175	0.146322	477	0.170077	561	0.184821	683	0.133544	534	0.177959	551	0.140276	670	0.15577	532	0.170645	611	0.17543
go	GO:0000315	organellar large ribosomal subunit	0.148507	452	0.16759	660	0.157749	622	0.146489	574	0.18525	472	0.166055	666	0.148722	461	0.137818	447	0.190438	653	0.122284	389	0.1769	522	0.157099	464	0.15958	534	0.154547	544	0.137305	259	0.150057	523	0.186411	613	0.185332	701	0.122197	581	0.141371	527	0.147751	769	0.160901	527	0.164194	600	0.175182
go	GO:0000502	proteasome complex																							0.00028324	3
go	GO:0001871	obsolete pattern binding															0.000228774	1																													4.56017e-05	1
go	GO:0001906	cell killing	0.000449915	2	0.00067984	3	0.000986463	3	0.00373259	4	0.000129887	2	0.000603887	2	0.000126752	2	0.000528632	2	0.000739774	2	0.00526466	2	0.000824061	3	0.000479855	1	0.000238175	2	0.000347304	2	0.000361382	1	0.00158752	4	0.00023559	2	7.58042e-05	2	0.00114671	2	0.000215483	2	0.00133913	4	0.00062094	2	0.000749378	3	0.000314385
go	GO:0002020	protease binding	0.000607557	6	0.00272204	8	0.00150533	6	0.00249183	8	0.00176595	8	0.000218841	3	0.000957686	8	0.000171546	1	0.000167227	4	0.00444352	9	0.00099224	6	0.00135854	7	0.000183789	3	0.000547082	6	0	0	0.00103608	7	0.000417478	4	0.000360043	4	0.00101852	5	0.000367188	5	0.000397702	5	0.00101686	7	0.000823377	6	0.000360198
go	GO:0002376	immune system process	0.000246748	1	0.000572027	2	0.000824757	2	0.00357746	3	5.67988e-05	1	0.000479807	1	8.86781e-05	1	0.000165931	1	0.000712414	1	0.00426949	1	0.000663748	2	0.000479855	1	0.000183679	1	0.000241902	1	0.000361382	1	0.0013035	3	0.000201749	1	5.20635e-05	1	0.00108121	1	0.000137512	1	0.00125162	3	0.000343006	1	0.000662021	2	0.000176012
go	GO:0002953	5'-deoxynucleotidase activity
go	GO:0003674	molecular_function	0.654251	1851	0.691696	2827	0.665707	2651	0.667272	2389	0.678757	1822	0.717145	2890	0.672498	2025	0.654975	1943	0.744233	2538	0.564336	1596	0.657034	2026	0.642973	1941	0.636067	2220	0.596989	2120	0.611563	1046	0.6523	2322	0.69322	2320	0.726854	2927	0.61482	2556	0.655969	2384	0.643764	3214	0.705801	2288	0.66926	2518	0.677732
go	GO:0003676	nucleic acid binding	0.139247	429	0.165929	696	0.141675	602	0.15019	539	0.127796	437	0.193537	835	0.14092	461	0.100351	398	0.23962	752	0.121364	341	0.104715	454	0.127811	451	0.120194	455	0.118152	483	0.0686673	148	0.170312	610	0.153617	580	0.142623	711	0.15893	623	0.122442	492	0.185673	846	0.121961	492	0.122564	585	0.104566
go	GO:0003677	DNA binding	0.0569634	188	0.0775691	297	0.0710253	275	0.0746574	241	0.0434937	189	0.0997107	384	0.0686214	216	0.0326804	157	0.104267	359	0.0802564	183	0.0367592	193	0.0670548	197	0.0527081	195	0.0466884	194	0.0158397	56	0.0735394	258	0.068114	257	0.0576398	302	0.090462	317	0.050173	224	0.104689	422	0.0556315	220	0.0555368	273	0.0341011
go	GO:0003700	DNA-binding transcription factor activity	0.000439667	5	0.000144769	5	0.000239345	5	0.00014589	3	0.000315188	5	0.000276344	5	0.00310191	7	0.000224842	4	0.000245026	7	0.000875428	2	0.00035752	2	0.0277151	6			0.00298651	7	7.83034e-05	1	0.000184532	1	0.000118677	3	0.00021345	6	0.000309414	6	0.000297801	5	8.47443e-05	2	0.000146789	3	0.000249197	4	0.000518753
go	GO:0003723	RNA binding	0.0502339	199	0.0626511	336	0.0524177	268	0.0601133	262	0.0476488	185	0.0712274	387	0.0505754	198	0.0353334	185	0.106753	339	0.0287996	128	0.0410799	204	0.0384926	204	0.0391549	210	0.0545101	248	0.0259022	60	0.0741186	292	0.0571211	263	0.0562032	332	0.0527917	259	0.0501246	220	0.061221	363	0.0430848	225	0.0408535	248	0.0468787
go	GO:0003735	structural constituent of ribosome	0.365378	1013	0.409203	1557	0.399055	1472	0.383254	1373	0.382101	977	0.415606	1663	0.351227	1037	0.322291	957	0.480342	1491	0.274721	821	0.411507	1166	0.391267	1133	0.369648	1246	0.371287	1225	0.262286	465	0.369619	1211	0.425743	1407	0.457983	1663	0.327328	1334	0.385568	1297	0.368569	1799	0.401159	1247	0.424065	1474	0.397009
go	GO:0003743	translation initiation factor activity	0.00310212	19	0.00476112	37	0.00246341	23	0.00444963	32	0.00189257	12	0.00435041	38	0.00265056	22	0.00135103	15	0.0038747	32	0.00159916	10	0.00139121	13	0.00297479	19	0.00182265	17	0.00348777	29	0.000906623	5	0.0034085	31	0.00271728	23	0.00359082	40	0.0030257	30	0.00311762	27	0.00549078	46	0.00191052	19	0.00249639	22	0.00262867
go	GO:0003746	translation elongation factor activity	0.00402335	14	0.00250949	18	0.00767899	30	0.0031003	11	0.00218974	12	0.00442196	16	0.00453258	19	0.00394924	22	0.00146785	9	0.00305865	15	0.00209467	12	0.00123845	11	0.0133739	30	0.00287127	9	0.0137066	13	0.00193399	9	0.000902576	3	0.00285557	20	0.00363208	21	0.00333458	26	0.00486825	30	0.00938914	22	0.00207713	10	0.0130301
go	GO:0003824	catalytic activity	0.0350982	196	0.0476143	363	0.0600311	378	0.0442033	246	0.0436122	182	0.0362312	227	0.0594433	283	0.0707286	308	0.0220586	191	0.0704381	237	0.0646908	266	0.0401363	206	0.0462714	277	0.0402423	233	0.105187	196	0.0372852	254	0.0318388	158	0.0336169	292	0.0536318	362	0.0585534	352	0.0417407	365	0.0870556	309	0.0303531	233	0.0534781
go	GO:0003855	3-dehydroquinate dehydratase activity			1.42898e-05	1							0	0	2.56768e-05	1	9.70892e-05	1			0.000458497	4											1.44677e-05	1			0.000171603	2	0.000151443	3	0.000252282	2
go	GO:0003887	DNA-directed DNA polymerase activity															2.15392e-05	1			5.6582e-05	1	0.000214395	2													0	0
go	GO:0003899	DNA-directed 5'-3' RNA polymerase activity	0.00292534	22	0.00316238	31	0.00327164	39	0.00311439	23	0.00462898	25	0.00326791	30	0.00333139	22	0.0038457	25	0.001109	14	0.00265717	14	0.00358858	23	0.00172786	16	0.00466217	29	0.00335892	19	0.00104505	6	0.00272764	21	0.00320603	31	0.00586533	39	0.00254555	26	0.00723637	33	0.00370235	42	0.00434855	23	0.00223936	28	0.0032823
go	GO:0003924	GTPase activity	0.000961858	2	0.000209978	1	0.000858543	2			0.000334501	3	0.000134859	1			0.000530626	2					2.91988e-06	1	0.000779045	2	0.000140081	2			0.000722613	2					0.00115977	2	4.26357e-05	1	0.000805457	4			0.000520407	2			0.00432113
go	GO:0003933	GTP cyclohydrolase activity																																					0.000139198	1					4.83408e-05	1
go	GO:0003934	GTP cyclohydrolase I activity																																					0.000139198	1					4.83408e-05	1
go	GO:0003937	IMP cyclohydrolase activity							5.72897e-05	1							2.28706e-05	1	4.42057e-05	2	0.000403938	3	0.000148074	3			0.000187355	2	3.76373e-05	1	0.000320392	2	2.73887e-05	1	0	0	7.1872e-05	1	0.000159125	1	0.000413658	2			6.05058e-05	1	0.000185072	2
go	GO:0003939	L-iditol 2-dehydrogenase (NAD+) activity					0.000186681	1	0.000104206	1													8.86974e-05	1											0	0	0	0
go	GO:0003961	O-acetylhomoserine aminocarboxypropyltransferase activity					0.000409727	2	6.97097e-05	2																					0	0					0.000117039	1			0.000279189	3	2.49143e-05	1					0.000428318
go	GO:0003984	acetolactate synthase activity			3.35647e-05	1											0.000261304	2			8.46556e-05	1							3.80449e-05	1			2.04667e-05	1							2.05605e-05	1
go	GO:0003989	acetyl-CoA carboxylase activity	0.000333837	1																	0	0													0	0					0	0
go	GO:0004017	adenylate kinase activity	9.72911e-05	1	4.82265e-05	1					0.000544713	2	3.05085e-05	1			0.00011419	2											0.00014417	1	0.00100067	2			4.09673e-05	1	6.75097e-05	1	4.3853e-05	2	0.000181416	4
go	GO:0004022	alcohol dehydrogenase (NAD+) activity	0.000230696	1	0.00023679	1	0.000227184	2	0.000300753	3	0.000451319	4	2.66678e-05	1					0.000129257	3			0.000157539	2	3.71253e-05	1			0.000175239	3	0	0	5.61735e-05	2	0	0	0.000172771	2			9.33616e-05	1	0.000125471	1	0.000194487	1	8.30675e-05	1
go	GO:0004042	L-glutamate N-acetyltransferase activity							6.58502e-05	1					1.01021e-05	1											1.12343e-05	1
go	GO:0004084	branched-chain-amino-acid transaminase activity			0.000196974	4	9.75683e-05	1	0	0	0.000318099	2									0.000179305	2					2.80718e-05	1			0.000243891	1					5.14788e-05	1			9.76968e-05	1
go	GO:0004106	chorismate mutase activity	2.53283e-05	1	3.02088e-05	2	1.45027e-05	1			3.44919e-05	1	1.73286e-05	1					4.43123e-05	2			9.55138e-05	1					7.88827e-05	3	0.000135402	1							4.86964e-05	1	0.000118622	1	9.58254e-05	2
go	GO:0004157	dihydropyrimidinase activity																							0	0							0.000163943	1
go	GO:0004175	endopeptidase activity															0.000440597	2	5.19609e-05	1	0	0													0	0			0.000276037	1	0.000131586	2	2.17942e-05	1	3.31907e-05	1
go	GO:0004177	aminopeptidase activity							0.000232266	2	4.17785e-05	1	0.00012101	2	0.000324884	4	5.04458e-05	2	4.49331e-05	1	0.000715131	4	0.000933027	4	0.00048047	2			0.000116034	2	0.000460125	2	5.73284e-05	2	1.76356e-05	1	0.000124108	2	3.56725e-05	1	7.56387e-05	1							0.00104536
go	GO:0004298	threonine-type endopeptidase activity
go	GO:0004332	fructose-bisphosphate aldolase activity	0.000606222	3	0.00103169	6	0.00107962	8	4.15514e-05	1	0.00117764	8	0.000390696	3	0.00232521	12	0.00344629	8			0.000264018	3	0.00127678	7	0.0037588	5	0.00147159	5	1.99399e-05	1	0.000729857	2	0.000205112	3	2.54094e-05	1	0.000124298	1	0.00325609	12	0.00233688	5	0.000281593	5	0.00302236	5	0.00104277	6	0.000136522
go	GO:0004351	glutamate decarboxylase activity
go	GO:0004353	glutamate dehydrogenase [NAD(P)+] activity	0.000127426	1	0.00152819	17	0.00498064	12	0.00383475	12	0.000702356	6	0.000296994	5	0.000799025	8	0.00147889	13	0.000154758	3	0.00105655	5	0.0094617	20	0.000222879	4	0.00319835	17	0.000911375	7	0.00289908	4	0.00436309	11	0.000157885	4	0.00236669	16	0.00549284	22	0.00198121	13	0.000717533	10	0.00342296	14	1.46946e-05	1	0.000705069
go	GO:0004354	glutamate dehydrogenase (NADP+) activity	0.000127426	1	0.00152819	17	0.00498064	12	0.00383475	12	0.000702356	6	0.000296994	5	0.000799025	8	0.00147889	13	0.000154758	3	0.00105655	5	0.00602374	15	0.000222879	4	0.00218778	12	0.000911375	7	0.00289908	4	0.000403799	6	0.000157885	4	0.00236669	16	0.00155336	16	0.00198121	13	0.000717533	10	0.00171675	13	1.46946e-05	1	0.000705069
go	GO:0004358	glutamate N-acetyltransferase activity							6.58502e-05	1					1.01021e-05	1											1.12343e-05	1
go	GO:0004360	glutamine-fructose-6-phosphate transaminase (isomerizing) activity																																			0.000132478	1
go	GO:0004365	glyceraldehyde-3-phosphate dehydrogenase (NAD+) (phosphorylating) activity	0.00137878	5	0.00133978	5	0.00156111	9	0.00124843	7	0.000736631	4	0.00172217	6	0.00092265	6	0.0011693	7	0.00157717	5	0.000904412	2	0.00107574	3	0.00129319	6	0.00253184	4	0.00125187	7	0.00114471	2	0.00127076	7	0.000153105	2	0.00281499	3	0.00178888	5	0.00139606	6	0.00160274	8	0.00504009	7	0.000282821	1	0.0020116
go	GO:0004448	isocitrate dehydrogenase [NAD(P)+] activity									2.20191e-05	1					7.26508e-05	1			0.000164644	1	6.34364e-05	1			0	0											0.000140533	2	9.35487e-05	1							6.14975e-05
go	GO:0004450	isocitrate dehydrogenase (NADP+) activity									2.20191e-05	1									0.000164644	1					0	0											0.000140533	2	9.35487e-05	1							6.14975e-05
go	GO:0004455	ketol-acid reductoisomerase activity	0.00132545	6	0.00206775	8	0.00151853	5	0.000314243	1	0.00131623	9	0.000534829	4	0.000842709	4	0.000702422	5	7.0397e-05	1	0.000135579	1	0.000551629	6			0.00294697	14			0.00157137	9	1.59092e-05	1	0	0	0.000850593	7	0.000507141	3	0.000459549	3	0.00171391	8	0.0033425	10	0.00013098	2	0.000217414
go	GO:0004478	methionine adenosyltransferase activity							9.36397e-05	1	7.62146e-05	1			0.000186248	3	0.000139069	1									0.000162968	2													0.000173867	2	5.06768e-05	1	0.000127546	1	8.58478e-05	1
go	GO:0004489	methylenetetrahydrofolate reductase (NAD(P)H) activity															8.06517e-05	1	0.000322165	3					6.98782e-05	1	7.24005e-05	2					6.41092e-05	1	0	0	9.37148e-05	1	0.000168783	2					0.000239796	1	0.000176988	1
go	GO:0004492	methyl/ethyl malonyl-CoA decarboxylase activity			0.000152849	4	5.04429e-05	2	3.22389e-05	1							0.000267512	4	8.05189e-05	2			0.00058661	5	0.000817233	3	0.000727398	8	0.000167241	2	0.000144342	1	0.000261913	3	0	0	0.000541337	1	0.000102749	2	0.000372233	6	0.000109222	3	0.000726845	5	5.12916e-05	1	8.54139e-05
go	GO:0004553	hydrolase activity, hydrolyzing O-glycosyl compounds	0.000117846	2	8.25346e-05	2	0.00126074	5	0.00123034	7	0.000435378	2	0	0	2.46416e-05	1	0.000150089	1	0.000883393	6	0.000660582	4	0.000110848	2	0.00184008	7	0.000255617	3	9.20955e-05	3	0.000700346	2	3.45648e-05	1	0.000466906	4	0.000179492	3	0.000698567	6	0.000336031	2	0.00152455	8	0.000332867	4	0.000368301	3	0.000221848
go	GO:0004565	beta-galactosidase activity					0.00110085	3	0.000155384	2	9.82591e-05	1											1.51856e-05	1			7.38028e-05	1																					0.000221848
go	GO:0004592	pantoate-beta-alanine ligase activity					6.82419e-05	1																																					2.9083e-05	1
go	GO:0004596	peptide alpha-N-acetyltransferase activity											0.000190542	1
go	GO:0004601	peroxidase activity			0.000170473	2			5.96179e-05	2							0	0	0.00016805	1	0.000331065	1											8.97051e-05	1	0.000455212	1			0.000557341	4	2.65272e-05	1			0.000215221	2			8.81144e-05
go	GO:0004611	phosphoenolpyruvate carboxykinase activity					0.000256053	1	6.49666e-05	1					0.00108838	2	0.00339579	3			0.00303336	1	0.000598457	3			0.000476198	3					0.000242601	3					0.00142991	7	0.00016424	3	9.68092e-05	1	0.00461949	3			5.37466e-05
go	GO:0004612	phosphoenolpyruvate carboxykinase (ATP) activity					0.000256053	1							0.00108838	2	0.00339579	3			0.00303336	1	0.000598457	3			0.000476198	3													0.00016424	3	9.68092e-05	1	0.00461949	3			5.37466e-05
go	GO:0004617	phosphoglycerate dehydrogenase activity	0.000126153	1	3.30423e-05	1	0.000226377	1																											0	0	2.6451e-05	1	5.99683e-05	1	0.000336045	4			0	0
go	GO:0004618	phosphoglycerate kinase activity	0.00142773	3	9.20819e-05	2	0.000861719	6			0.000152112	2	0.00056168	2	0.00013209	2	0.00014798	1	0.000554461	2			0.000714933	2	0.0026495	6			4.1845e-05	1	0.000331621	2			4.14167e-05	1	6.95189e-05	2	0.000116658	2	0.00013603	1	2.72089e-05	1	0.000423734	3	3.00672e-05	1	4.66655e-05
go	GO:0004619	phosphoglycerate mutase activity					0.000153039	4	0.000521469	1													9.26201e-05	1	0.000285524	2					0	0															4.56017e-05	1
go	GO:0004634	phosphopyruvate hydratase activity	0.000301976	2	4.48516e-05	1	0.000797783	3			0.000370132	2			0.000502212	2	0.000386625	3			0.000237224	1			4.22924e-05	1	5.70781e-05	2			0.000162814	1	9.49279e-05	1	3.92564e-05	1	6.12113e-05	1	0.000408991	3			0.000230362	4	0.00496696	4	0.000357895	3
go	GO:0004637	phosphoribosylamine-glycine ligase activity			0	0	5.45745e-05	2							0.000469482	2											3.73696e-05	1			9.16333e-05	1							2.15605e-05	1	0.000210149	3			0	0
go	GO:0004641	phosphoribosylformylglycinamidine cyclo-ligase activity			0.000437924	5	0.000206649	3																			3.73696e-05	1			0	0			1.7044e-05	1	7.37663e-06	1	1.33467e-05	1			6.95702e-05	2			0	0	9.46994e-06
go	GO:0004642	phosphoribosylformylglycinamidine synthase activity					0.000564412	4			0.00114245	4							0.000109089	1	0.00146119	5									7.50121e-05	1			0.000100439	1	0.00021533	3	1.57714e-05	1	0	0	5.94708e-05	2			4.15314e-05	1	0.000495427
go	GO:0004643	phosphoribosylaminoimidazolecarboxamide formyltransferase activity							5.72897e-05	1									1.63046e-05	1	0.000403938	3					0.000187355	2	3.76373e-05	1	0.000320392	2			0	0	7.1872e-05	1			0.000413658	2			6.05058e-05	1	0.000185072	2
go	GO:0004648	O-phospho-L-serine:2-oxoglutarate aminotransferase activity	3.85663e-05	1	0.00032444	4	5.08026e-05	1	0.000634195	4			0.000602335	2	8.90318e-05	1	9.46254e-05	1			0.000901452	4	0	0	1.31635e-05	1	0.00065822	1					1.17726e-05	1	8.70124e-05	2	5.73506e-05	2	0.000221695	2	0.00012699	1	0.000278814	4	0	0	0.000451965	5	0.000280937
go	GO:0004664	prephenate dehydratase activity	2.53283e-05	1	3.02088e-05	2	1.45027e-05	1			3.44919e-05	1	1.73286e-05	1					4.43123e-05	2			9.55138e-05	1					7.88827e-05	3									4.86964e-05	1	0.000118622	1	9.58254e-05	2
go	GO:0004672	protein kinase activity	8.85491e-05	1	0.000211876	2																	0.000471841	3			0.00063719	2			0.000553729	2							4.58641e-05	1	4.44273e-05	1	9.06449e-06	1	0.000142746	2			0.000658228
go	GO:0004673	protein histidine kinase activity			3.03673e-05	1																	4.15306e-05	2							0.000293796	1											9.06449e-06	1	6.96287e-05	1			8.93235e-05
go	GO:0004735	pyrroline-5-carboxylate reductase activity	0.000266677	2			5.38209e-05	1																					2.12201e-05	1	8.29555e-05	1									0.000142085	1					1.70695e-05	1
go	GO:0004749	ribose phosphate diphosphokinase activity																													0.000245916	2					3.83001e-05	1	1.36619e-05	1			6.90889e-05	1					0.000561368
go	GO:0004794	threonine deaminase activity																											0.000122882	2															5.43936e-05	1	0.000707682	2	2.47116e-05
go	GO:0004802	transketolase activity							1.96905e-05	1																																							0.000243603
go	GO:0004812	aminoacyl-tRNA ligase activity	0.00134086	6	0.000218518	5	0.000738501	13	0.000836095	4	4.56468e-05	2	7.85607e-05	2	0.000970332	4	0.00161879	16	0.000103297	3	0.000220623	1	0.000577399	8	0.000125748	4	0.000424268	5	0.000511537	7	0.000164897	1	0.00060181	7	7.17834e-05	2	0.000389907	7	0.000469907	8	0.00196992	9	0.000243974	7	0.000724212	7	1.51132e-05	1	0.0034569
go	GO:0004829	threonine-tRNA ligase activity			0.00013274	2	0.000330305	4	0.000112329	1	0	0			0.000151471	1	0.00019871	2			0.000220623	1	0.000181987	2					0.000148414	1			0.000130849	3	4.12057e-05	1	0.000249086	3	1.50628e-05	1			1.83275e-05	1	8.24368e-05	1	0	0	0.000147831
go	GO:0004845	uracil phosphoribosyltransferase activity	0.000257202	2	3.5331e-05	1	0.000124102	2							1.17389e-05	1	0.000187331	1	3.46048e-05	1			0.000293892	2			0.000733447	3	0.000150423	2	0.000162701	1	0.000130707	1	0	0	0.000134125	1	0.000190737	3	2.71818e-05	1			0	0	0.000153158	3
go	GO:0004857	enzyme inhibitor activity	0.000607557	6	0.00272204	8	0.00150533	6	0.00249183	8	0.00176595	8	0.000218841	3	0.000957686	8	0.000171546	1	0.000229293	5	0.00444352	9	0.00099224	6	0.00135854	7	0.000283863	5	0.000547082	6	0.000272871	2	0.00103608	7	0.000417478	4	0.000360043	4	0.00101852	5	0.000422267	6	0.000397702	5	0.00101686	7	0.000823377	6	0.000360198
go	GO:0004866	endopeptidase inhibitor activity	0.000607557	6	0.00272204	8	0.00150533	6	0.00249183	8	0.00176595	8	0.000218841	3	0.000957686	8	0.000171546	1	0.000229293	5	0.00444352	9	0.00099224	6	0.00135854	7	0.000283863	5	0.000547082	6	0.000272871	2	0.00103608	7	0.000417478	4	0.000360043	4	0.00101852	5	0.000422267	6	0.000397702	5	0.00101686	7	0.000823377	6	0.000360198
go	GO:0004869	cysteine-type endopeptidase inhibitor activity	0.000607557	6	0.00272204	8	0.00150533	6	0.00249183	8	0.00176595	8	0.000218841	3	0.000957686	8	0.000171546	1	0.000167227	4	0.00444352	9	0.00099224	6	0.00135854	7	0.000283863	5	0.000547082	6	7.66207e-05	1	0.00103608	7	0.000417478	4	0.000360043	4	0.00101852	5	0.000367188	5	0.000397702	5	0.00101686	7	0.000823377	6	0.000360198
go	GO:0005198	structural molecule activity	0.414684	1156	0.48093	1799	0.46491	1695	0.454246	1582	0.416539	1121	0.509264	2007	0.407126	1207	0.349027	1072	0.580367	1805	0.347546	978	0.443642	1327	0.424163	1298	0.417429	1402	0.408913	1378	0.274569	506	0.427372	1411	0.486943	1609	0.507791	1908	0.401758	1578	0.424606	1463	0.465099	2142	0.447803	1418	0.474031	1693	0.425931
go	GO:0005215	transporter activity	0.0115378	30	0.00750494	49	0.00990401	56	0.0103582	45	0.0122113	34	0.0110214	55	0.0131552	37	0.0109379	43	0.00679238	34	0.0118459	38	0.00834706	43	0.00950139	41	0.00420091	29	0.00767344	42	0.033041	43	0.0109197	40	0.00813769	39	0.00776723	48	0.0064874	32	0.00726068	35	0.00876575	59	0.0137384	53	0.00924962	38	0.0126982
go	GO:0005216	monoatomic ion channel activity	0.00175239	5	0.000862722	6	0.001423	6	0.00112342	6	0.0012379	5	0.0015668	10	0.0014726	4	0.000647853	3	0.000205308	3	0.00506995	10	0.0016815	7	0.000843158	2	0.00130779	5	0.000739918	4	0.00631208	7	0.00136998	9	0.000819776	3	0.000710086	3	0.00126506	6	0.000905725	5	0.00107373	8	0.00160442	10	0.00096601	6	0.00108393
go	GO:0005261	monoatomic cation channel activity	0.00175239	5	0.000862722	6	0.001423	6	0.00108184	5	0.0012379	5	0.0015668	10	0.0014726	4	0.000647853	3	0.000205308	3	0.00463547	8	0.0016815	7	0.000843158	2	0.00130779	5	0.000739918	4	0.00631208	7	0.00136998	9	0.000819776	3	0.000710086	3	0.00126506	6	0.000905725	5	0.00107373	8	0.00160442	10	0.000914476	5	0.00108393
go	GO:0005351	carbohydrate:proton symporter activity	0.00692721	8	0.00145353	13	0.00133321	13	0.00339596	15	0.00927426	19	0.00588234	17	0.0077083	8	0.00473372	13	0.00517416	12	0.00201047	3	0.00131709	6	0.00667918	22	0.000716255	4	0.00459061	13	0.00355002	5	0.00794095	13	0.00592498	19	0.00254557	12	0.00289057	7	0.0029061	11	0.0015109	7	0.00545041	10	0.00658475	11	0.00234313
go	GO:0005354	galactose transmembrane transporter activity																			4.37703e-05	1					9.47041e-05	1											0.000100344	2
go	GO:0005385	zinc ion transmembrane transporter activity																			0.000110232	1											0.000167314	2
go	GO:0005402	carbohydrate:monoatomic cation symporter activity	0.00692721	8	0.00145353	13	0.00133321	13	0.00339596	15	0.00927426	19	0.00588234	17	0.0077083	8	0.00473372	13	0.00517416	12	0.00201047	3	0.00131709	6	0.00667918	22	0.000716255	4	0.00459061	13	0.00355002	5	0.00794095	13	0.00592498	19	0.00254557	12	0.00289057	7	0.0029061	11	0.0015109	7	0.00545041	10	0.00658475	11	0.00234313
go	GO:0005488	binding	0.302873	821	0.297002	1188	0.255479	1064	0.294759	992	0.302529	846	0.327047	1319	0.30227	875	0.29871	847	0.340542	1109	0.257071	663	0.224226	811	0.249739	783	0.252083	883	0.240096	864	0.249769	442	0.308986	1073	0.289874	975	0.290631	1240	0.28293	1082	0.264923	933	0.291225	1351	0.26943	939	0.252681	1039	0.270131
go	GO:0005506	iron ion binding	0.00061406	8	0.000233792	9	0.000786096	10	0.000729197	7	0.000138991	2	0.000161108	4	0.00154004	6	0.000691543	5	5.97283e-05	2	0.000426489	5	0.000350748	2	6.91079e-05	2	0.00547285	11	2.17846e-05	1	0.00136948	3	0.000431249	4	0.000538085	7	0.000180215	4	0.000967234	8	0.00168743	5	0.000119645	3	0.000566103	5	0.0038003	10	0.000632739
go	GO:0005515	protein binding	0.00181545	14	0.00456636	20	0.00402743	20	0.00686414	18	0.00217514	13	0.00107919	9	0.00128336	12	0.00176028	14	0.00108614	10	0.00979929	12	0.0025271	15	0.00363525	20	0.00253668	17	0.000951933	9	0.000950977	5	0.00378066	21	0.00105597	10	0.00129544	17	0.00283033	14	0.000997519	12	0.00252638	19	0.00209189	17	0.00253614	17	0.0018422
go	GO:0005524	ATP binding	0.105177	216	0.060282	229	0.0381767	215	0.0623266	208	0.0875613	192	0.0521243	192	0.0878477	192	0.107753	227	0.0707584	190	0.0788707	185	0.0805336	203	0.0544719	147	0.0643888	189	0.0731195	195	0.113947	175	0.0670549	221	0.0741231	187	0.0773345	254	0.0624247	206	0.0815763	218	0.0374988	169	0.0754199	203	0.0666054	208	0.0912124
go	GO:0005525	GTP binding	0.000961858	2	0.000475103	3	0.000986029	3	2.40936e-05	1	0.000816789	5	0.000134859	1	0.000959027	4	0.00063982	3	0.000209852	2			2.91988e-06	1	0.000830167	3	0.00444932	5			0.00114858	3			0	0	0.00115977	2	0.000844396	5	0.000805457	4			0.000520407	2	2.66935e-05	1	0.00451283
go	GO:0005575	cellular_component	0.440932	1216	0.492501	1864	0.496159	1793	0.487169	1659	0.452365	1150	0.497162	1929	0.406817	1220	0.381734	1151	0.566487	1741	0.423776	1066	0.486168	1393	0.456229	1310	0.441291	1460	0.427284	1414	0.369825	636	0.454042	1463	0.507091	1621	0.514398	1909	0.399886	1604	0.446428	1509	0.463785	2172	0.457872	1474	0.492081	1675	0.465313
go	GO:0005576	extracellular region	0.00234472	6	0.000753525	4	0.00339552	10	0.0040169	7	0.00464647	4	0.000805517	4	0.00108494	6	0.00349263	9	0.00114173	6	0.00579522	5	0.000873556	4	0.0023832	9	0.000588471	4	0.000504562	4	0.000361382	1	0.00288594	17	0.000300502	5	0.00140389	6	0.00251921	12	0.00462072	13	0.00225245	13	0.000770727	5	0.000749378	3	0.000875199
go	GO:0005615	extracellular space	0.000316142	2	0.000506843	2	0.000704502	2	0.00269373	3	9.91839e-05	2	0.000479807	1	8.86781e-05	1	0.000192943	2	0.000712414	1	0.00480006	4	0.00053372	2	0.000479855	1	0.000183679	1	0.000241902	1	0.000361382	1	0.00053599	3	0.000224232	2	0.000106287	2	0.00113172	3	0.000254723	2	0.00107247	3	0.00043347	2	0.000422261	1	0.00022303
go	GO:0005622	intracellular anatomical structure	0.00031422	2	0.000640672	3	0.00108167	5	0.00360155	4	5.67988e-05	1	0.000820206	4	0.00163041	3	0.000711847	4	0.000919974	4	0.0045712	4	0.000663748	2	0.000763095	4	0.00109409	4	0.000271383	2	0.000361382	1	0.00140117	5	0.00037081	3	0.00016207	3	0.00128741	3	0.000137512	1	0.00146438	4	0.00202374	10	0.000758587	3	0.000176012
go	GO:0005623	obsolete cell	0.00031422	2	0.000640672	3	0.000954185	4	0.00357746	3	5.67988e-05	1	0.000820206	4	0.00163041	3	0.000940621	5	0.000919974	4	0.0045712	4	0.000663748	2	0.000763095	4	0.00109409	4	0.000271383	2	0.000361382	1	0.00140117	5	0.00037081	3	0.00016207	3	0.00128741	3	0.000137512	1	0.00146438	4	0.00202374	10	0.000804188	4	0.000176012
go	GO:0005730	nucleolus	0.000607557	6	0.00272204	8	0.00150533	6	0.00249183	8	0.00176595	8	0.000218841	3	0.000957686	8	0.000171546	1	0.000167227	4	0.00444352	9	0.00099224	6	0.00143812	8	0.000183789	3	0.000547082	6	0	0	0.00103608	7	0.000417478	4	0.000360043	4	0.00101852	5	0.000367188	5	0.000397702	5	0.00101686	7	0.000823377	6	0.000360198
go	GO:0005737	cytoplasm	0.00534707	17	0.0060462	31	0.00436648	28	0.00942655	27	0.00886582	25	0.00443727	27	0.00452069	19	0.00517644	17	0.00417821	20	0.0130577	22	0.00300822	16	0.00712405	28	0.00186844	15	0.00471024	17	0.00672762	13	0.0057973	22	0.0046244	22	0.00295725	23	0.00479671	26	0.00406111	20	0.00357385	26	0.00425735	22	0.00777117	21	0.00266707
go	GO:0005762	mitochondrial large ribosomal subunit	0.148507	452	0.16759	660	0.157749	622	0.146489	574	0.18525	472	0.166055	666	0.148722	461	0.137818	447	0.190438	653	0.122284	389	0.1769	522	0.157099	464	0.15958	534	0.154547	544	0.137305	259	0.150057	523	0.186411	613	0.185332	701	0.122197	581	0.141371	527	0.147751	769	0.160901	527	0.164194	600	0.175182
go	GO:0005763	mitochondrial small ribosomal subunit	0.14447	398	0.168217	628	0.145935	554	0.151714	545	0.15392	372	0.168292	670	0.164781	455	0.152745	427	0.182226	542	0.0899403	302	0.168932	488	0.142211	445	0.163384	532	0.135111	481	0.0977009	175	0.146322	477	0.170077	561	0.184821	683	0.133544	534	0.177959	551	0.140276	670	0.15577	532	0.170645	611	0.17543
go	GO:0005794	Golgi apparatus	0.000246748	1	0.000433158	1	0.000675763	1	0.00255798	1	5.67988e-05	1	0.000479807	1	8.86781e-05	1	0.000165931	1	0.000712414	1	0.00426949	1	0.000484225	1	0.000514121	2	0.000183679	1	0.000241902	1	0.000361382	1	0.000467145	1	0.000201749	1	5.20635e-05	1	0.00108121	1	0.000137512	1	0.000840586	1	0.000343006	1	0.000422261	1	0.000176012
go	GO:0005796	Golgi lumen	0.000246748	1	0.000433158	1	0.000675763	1	0.00255798	1	5.67988e-05	1	0.000479807	1	8.86781e-05	1	0.000165931	1	0.000712414	1	0.00426949	1	0.000484225	1	0.000479855	1	0.000183679	1	0.000241902	1	0.000361382	1	0.000467145	1	0.000201749	1	5.20635e-05	1	0.00108121	1	0.000137512	1	0.000840586	1	0.000343006	1	0.000422261	1	0.000176012
go	GO:0005829	cytosol	6.7472e-05	1	0.000138869	1	0.000148994	1	0.00101947	2			0.000340399	3	0.00154173	2	8.06517e-05	1	0.00020756	3	4.09096e-05	1	0.000536183	3	0.000317506	4	3.21626e-05	1	2.94803e-05	1			0.000836356	2	0.000169061	2	4.69135e-05	1	0.000217649	2			0.000623791	3	0.00174154	9	0.000336326	2
go	GO:0005840	ribosome	0.344439	960	0.386856	1490	0.378727	1398	0.361482	1276	0.347183	903	0.394551	1580	0.330503	976	0.305495	906	0.456112	1418	0.258107	770	0.385261	1090	0.362915	1068	0.341706	1174	0.352697	1156	0.244323	437	0.350934	1137	0.399147	1325	0.42817	1566	0.314304	1269	0.364166	1210	0.34962	1700	0.375533	1170	0.400365	1389	0.371073
go	GO:0005886	plasma membrane	0.00556669	9	0.00166418	16	0.00220162	14	0.00487239	18	0.00860107	20	0.00465861	23	0.00238498	3	0.00414566	11	0.00489913	14	0.00720937	15	0.00314606	14	0.00543136	16	0.00133074	5	0.0039784	11	0.0100809	11	0.00530339	17	0.00461369	16	0.00256816	13	0.00319964	12	0.00320753	10	0.00570347	20	0.0030106	16	0.00658658	11	0.00309359
go	GO:0005975	carbohydrate metabolic process	0.00235195	11	0.00349388	25	0.00422131	25	0.00268553	15	0.00229057	22	0.00246535	11	0.00395509	21	0.00774344	31	0.00062887	13	0.00273636	8	0.0038836	21	0.00760444	20	0.00235911	16	0.000984625	8	0.00301551	11	0.00136698	13	0.000557682	7	0.00314523	12	0.00419868	26	0.00391612	17	0.00112685	20	0.00833754	20	0.00158179	14	0.00406482
go	GO:0005996	monosaccharide metabolic process	0.00013199	1	0.00163516	7	0.00109753	6	0.00106176	5	0.000293755	3	0.00133329	4	0.00171681	7	0.000369363	6	1.53905e-05	1	0.00197976	4	0.00147936	8	0.000439169	4	0.000782605	7	5.35556e-05	1	0.00148145	5	0.000901136	5	0	0	0.00260928	3	0.000260815	3	0.000171629	2	0.000517336	6	0.0042026	5	0.000562601	4	4.51478e-05
go	GO:0006004	fucose metabolic process	0.00013199	1	0.00028604	2					0	0	1.76233e-05	1	2.03511e-05	1	0	0			0.0014515	2	0.000179284	1	0.00024712	2	0.000108996	1			0.000915834	3	6.82975e-05	1	0	0					7.76801e-05	1	0.000100031	1			0.00051374	3	4.51478e-05
go	GO:0006006	glucose metabolic process			0.00134912	5	0.00109753	6	0.000142617	2	0.000293755	3	0.00118472	2	0.00167181	5	0.000352301	5			0.000430173	1	0.000844008	4	0.000192049	2	0.000511867	4	5.35556e-05	1	0.000467299	1	0.000832838	4			0.00259712	2	0.00019715	1	9.39491e-05	1	5.69702e-05	1	0.0042026	5
go	GO:0006012	galactose metabolic process																																					3.80134e-05	1			4.72618e-05	1
go	GO:0006059	hexitol metabolic process	2.50851e-05	1			2.56351e-05	1	0.000110723	2	0.000116098	2							5.79523e-05	1															2.86446e-05	1							4.21883e-05	1			3.03084e-05	1
go	GO:0006066	alcohol metabolic process	2.50851e-05	1	6.86458e-05	1	2.56351e-05	1	0.00056684	4	0.000211275	3							7.05803e-05	2					2.93756e-05	1	0	0	7.72628e-05	1	0	0			2.86446e-05	1							4.21883e-05	1	0.000375529	2	3.03084e-05	1	0.000979002
go	GO:0006082	organic acid metabolic process	0.00714988	14	0.00819411	35	0.00834249	35	0.0055785	20	0.00800362	17	0.00649244	24	0.0147933	22	0.0131917	25	0.00113005	15	0.00594418	18	0.00352725	22	0.0119835	22	0.00741888	33	0.00583815	15	0.0104999	24	0.00384696	16	0.00677411	7	0.00618223	29	0.00551045	31	0.00671197	21	0.00766837	41	0.00599724	25	0.000715331	11	0.00659434
go	GO:0006084	acetyl-CoA metabolic process													0.00168923	2					0	0																			0.000186743	2
go	GO:0006090	pyruvate metabolic process	0.00142773	3	0.000663282	8	0.00116514	11			0.000388911	4	0.00114584	6	0.00158277	8	0.0035468	11	0.000348245	5	0.000452813	2	0.00163167	7	0.00650624	12	0.000773859	2	9.54006e-05	2	0.000331621	2	0	0	6.21318e-05	2	0.000120769	3	0.000251005	6	0.00218839	5	0.000117348	4	0.00083926	7	3.00672e-05	1	8.97674e-05
go	GO:0006091	generation of precursor metabolites and energy	0.00168163	5	0.000687396	9	0.0017337	16			0.000412658	5	0.00118599	7	0.00160787	9	0.00384843	14	0.00040001	6	0.00170092	11	0.00189542	10	0.00650624	12	0.000773859	2	9.54006e-05	2	0.00965894	8	0.000279262	4	0.000167823	3	0.000120769	3	0.000829332	12	0.00218839	5	0.00059822	11	0.0014839	11	3.00672e-05	1	0.00106075
go	GO:0006094	gluconeogenesis			8.55595e-05	1	0.000283416	2	6.49666e-05	1			0.000202242	1	0.00108838	2	0.000120211	2					0.000751388	3	0.000129659	1	0.000511867	4	5.35556e-05	1											9.39491e-05	1	5.69702e-05	1	0.000164718	2
go	GO:0006096	glycolytic process	0.00142773	3	0.000663282	8	0.00113777	10			0.000388911	4	0.00114584	6	0.00158277	8	0.0035468	11	0.000348245	5	0.000452813	2	0.00163167	7	0.00650624	12	0.000773859	2	9.54006e-05	2	0.000331621	2	0	0	6.21318e-05	2	0.000120769	3	0.000251005	6	0.00218839	5	0.000117348	4	0.00083926	7	3.00672e-05	1	8.97674e-05
go	GO:0006109	regulation of carbohydrate metabolic process	0.000227188	2	0.000380967	6	4.22567e-05	1			0.000307095	2	7.43271e-05	2	0.000321611	4	0.00128611	11	0.000190287	7			0.000461269	2	0.000254583	2	0.00068796	6	0.000224585	3	0	0	0.000716553	6	0.000788466	5	0.000119657	2	0.000105075	2	0.000501299	5	0.000187914	3	0.000499014	7	0.000209865	3	7.55045e-05
go	GO:0006113	fermentation
go	GO:0006139	nucleobase-containing compound metabolic process	0.00704598	39	0.00608094	64	0.00594506	65	0.00451425	36	0.00672672	40	0.00615525	52	0.00916233	50	0.0101198	57	0.00374292	48	0.0260959	45	0.00774547	47	0.0094449	33	0.00848377	56	0.00481854	33	0.0133982	27	0.00579749	50	0.00528126	47	0.00750065	61	0.00568958	59	0.0127783	70	0.0154983	90	0.00928931	59	0.0039671	47	0.00808828
go	GO:0006144	purine nucleobase metabolic process			0	0	5.45745e-05	2	0.000127808	1					0.000469482	2											7.80694e-05	2			9.16333e-05	1							2.15605e-05	1	0.000210149	3			0	0
go	GO:0006163	purine nucleotide metabolic process	0.00325682	9	0.00190685	17	0.00287873	25	0.00117043	7	0.00173152	11	0.00296278	19	0.00345866	16	0.00498181	20	0.00137071	12	0.00523766	12	0.00378324	20	0.00757707	15	0.00349669	16	0.00127049	10	0.00752168	13	0.00161359	14	0.00103997	7	0.00102298	13	0.00251036	19	0.00363549	15	0.00140126	17	0.00352034	24	0.000940106	7	0.00367834
go	GO:0006164	purine nucleotide biosynthetic process	0.00182908	6	0.00124356	9	0.0016702	14	0.00108184	5	0.00134261	7	0.00201918	14	0.00184853	7	0.00147813	8	0.00102246	7	0.00478485	10	0.00215158	13	0.00107082	3	0.00272283	14	0.00117508	8	0.00719006	11	0.00159428	13	0.000977838	5	0.000880061	9	0.00225935	13	0.0014471	10	0.00119038	12	0.00227132	16	0.000910039	6	0.00358857
go	GO:0006188	IMP biosynthetic process			1.48749e-05	1	3.08795e-05	1	0	0							2.28706e-05	1					0.000107601	2									2.73887e-05	1			2.75821e-05	1	0.000190212	1	0.000435187	2	9.16304e-05	1	0	0			0.000371479
go	GO:0006195	purine nucleotide catabolic process	0.00142773	3	0.000663282	8	0.00113777	10			0.000388911	4	0.00114584	6	0.00158277	8	0.0035468	11	0.000348245	5	0.000452813	2	0.00163167	7	0.00650624	12	0.000773859	2	9.54006e-05	2	0.000331621	2	0	0	6.21318e-05	2	0.00014292	4	0.000251005	6	0.00218839	5	0.000117348	4	0.00083926	7	3.00672e-05	1	8.97674e-05
go	GO:0006259	DNA metabolic process	0	0	0.000186371	3	0.000107042	1	0.000352581	6			1.40522e-05	1			2.15392e-05	1	0.000419663	10	0.0170786	16	0.000108898	2			3.45444e-05	1	0	0	0.00417998	3	0.000117318	3	0.000103209	1	0.00022744	2	6.4573e-05	1	0.000239764	4	0.0102625	27	0	0	0.000638401	8	0
go	GO:0006260	DNA replication															2.15392e-05	1			0.000295402	2	3.70622e-05	1			0	0			0.000132426	1					0.000203995	1
go	GO:0006351	DNA-templated transcription	0.00289618	21	0.00310381	30	0.00273203	33	0.00286344	22	0.00452866	24	0.00283236	27	0.00289863	19	0.00379833	24	0.001109	14	0.00265717	14	0.00320772	21	0.00158747	15	0.0039649	25	0.00316025	18	0.000813943	5	0.00272764	21	0.00305979	29	0.00558453	36	0.00248802	24	0.00706822	31	0.00357151	41	0.0040452	21	0.0018965	25	0.00249261
go	GO:0006352	DNA-templated transcription initiation	0	0											3.3837e-05	1			2.63465e-05	1	0.000875428	2													5.84373e-05	1					0.000134472	1							5.0647e-05
go	GO:0006355	regulation of DNA-templated transcription	0.00201867	16	0.0011595	21	0.00144669	20	0.00169464	11	0.00227805	18	0.00106361	12	0.00626769	25	0.00156476	17	0.00129127	24	0.0194472	26	0.00283365	18	0.0289072	17	0.00175619	12	0.00489963	20	0.000441762	3	0.00754692	26	0.00240784	25	0.00343718	28	0.00473459	37	0.00179112	23	0.0121798	40	0.00272651	21	0.00137094	17	0.00190699
go	GO:0006364	rRNA processing	9.6449e-05	1	4.41519e-05	1							6.90394e-05	1	9.87784e-05	1																							8.8827e-05	1			2.17942e-05	1	0.0009102	2	2.32106e-05	1
go	GO:0006396	RNA processing	0.000268915	2	0.00021851	2	0.000144773	3	0.00056935	5	0.00474782	8	6.90394e-05	1	0.000322442	3	0.000232304	2	0.00097123	4	0.000314711	1			0.000381258	1	0.000297579	2			0.000274815	2	0	0			0.000122765	2	8.8827e-05	1	0.00025079	2	2.17942e-05	1	0.000999387	3	2.32106e-05	1	0.000428276
go	GO:0006401	RNA catabolic process	0.000274793	3	0.000459632	7	4.22567e-05	1			0.000307095	2	7.43271e-05	2	0.000430259	5	0.00128611	11	0.000799014	10	0.000247074	1	0.000461269	2	0.000254583	2	0.000738694	8	0.000224585	3	0.000141812	1	0.000886066	7	0.000923991	7	0.000152737	3	0.000105075	2	0.000501299	5	0.000227494	3	0.000499014	7	0.000363206	4	7.55045e-05
go	GO:0006402	mRNA catabolic process	0.000227188	2	0.000380967	6	4.22567e-05	1			0.000307095	2	7.43271e-05	2	0.000321611	4	0.00128611	11	0.000190287	7			0.000461269	2	0.000254583	2	0.00068796	6	0.000224585	3	0	0	0.000716553	6	0.00084529	6	0.000119657	2	0.000105075	2	0.000501299	5	0.000178849	2	0.000499014	7	0.000209865	3	7.55045e-05
go	GO:0006412	translation	0.35147	983	0.392257	1514	0.382301	1423	0.371662	1320	0.364302	940	0.397033	1600	0.334206	996	0.312137	930	0.471638	1465	0.261933	787	0.389127	1115	0.368361	1088	0.349963	1202	0.357625	1181	0.246679	445	0.357699	1170	0.406527	1356	0.43603	1607	0.317126	1292	0.370273	1248	0.357017	1741	0.380601	1200	0.406531	1422	0.373853
go	GO:0006413	translational initiation	0.00310212	19	0.00476112	37	0.00216742	21	0.00444963	32	0.00189257	12	0.00435041	38	0.00283738	23	0.00135103	15	0.0038747	32	0.00159916	10	0.00139121	13	0.00286699	18	0.00182265	17	0.00348777	29	0.000906623	5	0.0034085	31	0.00271728	23	0.00359082	40	0.00298638	29	0.00311762	27	0.00549078	46	0.00191052	19	0.00249639	22	0.00262867
go	GO:0006414	translational elongation	0.0013189	5	0.000304837	1	0.000418942	6			0.000482287	2	0.00012326	2	0.000520377	4	0.000803338	6			0.00184373	9	0.000658003	5	0.000335063	3	0.000958079	9			0.000144905	1	9.78134e-05	1	0	0	0.000152202	3	0.000298149	3	0.000983333	10	0.000167365	4	0.000416574	5	0.000867296	3	0.000298213
go	GO:0006457	protein folding	0.102522	200	0.0574932	207	0.03583	194	0.0609891	202	0.0858892	184	0.0505178	181	0.0863767	183	0.106426	217	0.0703672	182	0.0731035	175	0.077224	183	0.0528308	139	0.0624635	178	0.0710568	187	0.104217	154	0.0653004	206	0.0733034	184	0.0762784	240	0.0598949	188	0.0797268	199	0.0330158	150	0.0602298	174	0.0649242	202	0.0885706
go	GO:0006508	proteolysis			7.97805e-05	1			0.000261468	3			2.4026e-05	1	0.000305828	3	0.000440597	2	5.19609e-05	1	0.000809058	4	0.000810962	5	0.000763709	5			4.37093e-05	1	0.000460125	2	0	0	0.000325677	3	0.000124108	2	0.000276037	1	0.000255523	3	5.07548e-06	1	3.31907e-05	1	0.000176167	1	0.00104536
go	GO:0006518	peptide metabolic process			0.000596523	3	0.000493078	3	5.74894e-05	1	6.09767e-05	2	0.000138157	2	0	0	0.000480848	2	4.48679e-05	1	4.09096e-05	1			7.9351e-05	1	3.21626e-05	1	0.000628704	3	0.00160984	3	4.93389e-05	1			0.000285997	2	0.000210067	3	0.000443454	1	0.000318564	3	0.000939806	3
go	GO:0006520	amino acid metabolic process	0.00188986	11	0.00416291	29	0.00553565	24	0.00426024	20	0.00308471	20	0.00156573	14	0.00194985	16	0.00297403	23	0.000583964	8	0.00243207	11	0.0106895	34	0.00010355	4	0.00683854	40	0.00194126	18	0.00528723	20	0.0052885	21	0.000157885	4	0.00369567	32	0.00736999	42	0.003678	28	0.00318443	26	0.00740625	30	0.000715657	7	0.00289975
go	GO:0006525	arginine metabolic process							6.58502e-05	1					1.01021e-05	1	6.70423e-05	1									1.12343e-05	1									4.85117e-05	1	5.09865e-05	1
go	GO:0006526	L-arginine biosynthetic process							6.58502e-05	1					1.01021e-05	1											1.12343e-05	1
go	GO:0006534	cysteine metabolic process			0.000653575	2	0.000977405	6	6.97097e-05	2					0.00018612	1			3.66437e-05	1	0.000102639	1					0.000718867	3	0.000538705	2	9.21347e-05	1	4.1914e-05	1			0.00154696	8	0.000120382	1	0.000279189	3	2.49143e-05	1					0.000428318
go	GO:0006555	methionine metabolic process															8.06517e-05	1	0.000322165	3	0.000102639	1					8.42165e-05	2			3.358e-05	1							0.000128822	1					0.000239796	1	8.72528e-06	1
go	GO:0006556	S-adenosylmethionine biosynthetic process							9.36397e-05	1	7.62146e-05	1			0.000186248	3	0.000139069	1									0.000162968	2													0.000173867	2	5.06768e-05	1	0.000127546	1	8.58478e-05	1
go	GO:0006563	L-serine metabolic process			8.74568e-05	1			3.5177e-05	1									3.66437e-05	1	0.000495134	2					0.000494088	2			0.000228013	2					0.000128066	1	0.000267647	2			0.000154865	3	0	0			0
go	GO:0006564	L-serine biosynthetic process			8.74568e-05	1															0.000495134	2					0	0											0.000147265	1			0.00013233	2	0	0			0
go	GO:0006575	modified amino acid metabolic process					6.82419e-05	1	8.33657e-05	2																			2.33993e-05	1	0.00035269	3									4.04245e-06	1	0.000107326	3	2.9083e-05	1	3.61773e-05	1
go	GO:0006591	ornithine metabolic process							0.000146561	1											0.0005739	2	0	0							0.00015055	1	0.000441732	3					9.41997e-05	1	0	0	0.000320119	3			6.78301e-05	1	0
go	GO:0006629	lipid metabolic process	0.00437137	4	0.00408955	12	0.00432061	10	0.00549639	16	0.00605069	2	0.00479444	13	0.0113724	5	0.00817951	5	0.000320918	4	0.00475671	12	0.00106005	7	0.00547723	10	0.00285562	10	0.00499514	4	0.00637096	6	0.00328918	10	0.00671198	5	0.00365927	9	0.00407461	17	0.00329894	6	0.00508968	17	0.00114328	3	0.000477728	6	0.00577437
go	GO:0006631	fatty acid metabolic process	0.00437137	4	0.00378244	7	0.00432061	10	0.00519208	13	0.00605069	2	0.00479444	13	0.0113724	5	0.00815516	4	0.00030829	3	0.00334729	8	0.000779183	6	0.00547723	10	0.00285562	10	0.00499514	4	0.00637096	6	0.00323	9	0.00671198	5	0.00365927	9	0.00354734	9	0.0031133	3	0.00508968	17	0.00114328	3	0.000477728	6	0.00564416
go	GO:0006633	fatty acid biosynthetic process	0.00437137	4	0.000164097	3	0.00103252	8	0.00366163	12	4.87794e-05	1	0.00369028	11	0.00428838	4	0.00073475	2	0.00030829	3	0.00244997	6	0.00066168	5	0.00519911	7	0.00261719	9	0.000510929	3	0.0015815	4	0.00315767	7	0.00397006	4	0.00358146	8	0.000863531	7	0.000216313	1	0.00343032	15	0.00114328	3	0.000477728	6	0.00139811
go	GO:0006637	acyl-CoA metabolic process													0.00168923	2					0	0																			0.000186743	2
go	GO:0006662	glycerol ether metabolic process					2.85211e-05	1	8.7473e-05	2			7.30254e-05	1	3.10032e-05	1					6.53021e-05	1	7.27035e-05	1			0.000114515	2									0.000142655	3	6.12274e-05	2	0.000135284	2	2.91251e-05	1			0.000554926	7
go	GO:0006753	nucleoside phosphate metabolic process	0.00325682	9	0.00207051	19	0.00287873	25	0.00117043	7	0.00173152	11	0.00296278	19	0.00518585	20	0.00498181	20	0.00137071	12	0.00523766	12	0.00378324	20	0.00757707	15	0.00354932	17	0.00127049	10	0.00784637	16	0.0016761	15	0.00103997	7	0.00106241	15	0.00256215	22	0.00394349	19	0.00140126	17	0.00352034	24	0.000940106	7	0.0042673
go	GO:0006754	ATP biosynthetic process	0.00175239	5	0.00121312	7	0.00143066	9	0.00108184	5	0.00134261	7	0.00201918	14	0.00184853	7	0.00145526	7	0.00102246	7	0.00469078	9	0.00196877	10	0.000843158	2	0.00251643	12	0.00117508	8	0.00651939	8	0.00145165	10	0.000977838	5	0.00073952	5	0.00163825	8	0.0009073	6	0.00107658	10	0.00221167	15	0.000910039	6	0.00320364
go	GO:0006766	vitamin metabolic process	0.00113943	6	6.83184e-05	2	0.000100425	2	0.000388664	1	8.4846e-05	1	8.53955e-05	2	0.00107816	5	0.000213846	2					0	0	0	0	0.000415293	4	2.33993e-05	1	0.0072486	5	0.000266364	3	0	0	6.79341e-05	3	0.000661356	5	8.21591e-05	3	0.000108057	3	0.000133556	3	0.000263509	2	5.78553e-05
go	GO:0006767	water-soluble vitamin metabolic process	0.00113943	6	6.83184e-05	2	0.000100425	2	0.000388664	1	8.4846e-05	1	8.53955e-05	2	0.00107816	5	0.000213846	2					0	0	0	0	0.000415293	4	2.33993e-05	1	0.0072486	5	0.000266364	3	0	0	6.79341e-05	3	0.000661356	5	8.21591e-05	3	0.000108057	3	0.000133556	3	0.000263509	2	5.78553e-05
go	GO:0006771	riboflavin metabolic process	0.000111053	2	1.19406e-05	1																															6.79341e-05	3	0.000224411	2	5.97855e-05	1	3.02396e-05	1
go	GO:0006790	sulfur compound metabolic process			0.000653575	2	0.000977405	6	0.000163349	3	7.62146e-05	1			0.0020616	6	0.00021972	2	0.000358809	4	0.000102639	1					0.000966052	7	0.000538705	2	0.000125715	2	4.1914e-05	1			0.00154809	9	0.000249205	2	0.000724896	8	7.55911e-05	2	0.000367342	2	0.00013075	3	0.000428318
go	GO:0006793	phosphorus metabolic process	0.00388984	15	0.00278094	22	0.00392696	36	0.00154035	10	0.00186733	12	0.0037173	25	0.00665632	34	0.00517526	22	0.00150974	16	0.005913	15	0.00502985	31	0.00767555	16	0.00640588	27	0.00538765	17	0.00908663	20	0.00498421	23	0.00110701	8	0.00106241	15	0.00531732	35	0.00459118	25	0.00216413	27	0.00615778	33	0.00170441	13	0.00446975
go	GO:0006796	phosphate-containing compound metabolic process	0.00388984	15	0.00278094	22	0.00392696	36	0.00154035	10	0.00186733	12	0.0037173	25	0.00665632	34	0.00517526	22	0.00150974	16	0.005913	15	0.00502985	31	0.00767555	16	0.00640588	27	0.00538765	17	0.00908663	20	0.00498421	23	0.00110701	8	0.00106241	15	0.00528881	34	0.00459118	25	0.00216413	27	0.00615778	33	0.00170441	13	0.00446975
go	GO:0006808	regulation of nitrogen utilization			1.80107e-05	1											4.95853e-05	2									0.000493234	3	0.000101983	1					7.4953e-05	1											0.000145576	2
go	GO:0006810	transport	0.0130277	33	0.00742069	50	0.0103623	51	0.0112945	45	0.0160092	32	0.011125	58	0.0124293	31	0.0112484	44	0.00677112	33	0.0112057	34	0.00741556	36	0.00955624	42	0.00420039	29	0.00778174	41	0.0328023	41	0.0115353	39	0.00809241	39	0.00870319	51	0.00527872	22	0.00687965	30	0.00843915	52	0.0132752	49	0.00927575	39	0.0126299
go	GO:0006811	monoatomic ion transport	0.0027465	11	0.00459221	21	0.006002	22	0.00587478	18	0.001376	7	0.00229	16	0.00131061	5	0.00260439	8	0.000282407	4	0.00642094	18	0.00296168	11	0.00153948	7	0.00287641	16	0.00179848	11	0.0265233	25	0.00235692	15	0.00126666	10	0.0022244	11	0.00130963	5	0.00314901	9	0.00190209	19	0.00425639	18	0.00131623	9	0.00668485
go	GO:0006812	monoatomic cation transport	0.0027465	11	0.00437144	17	0.006002	22	0.00575688	16	0.001376	7	0.00229	16	0.00131061	5	0.00260439	8	0.000282407	4	0.00598647	16	0.00292727	10	0.00153948	7	0.00287641	16	0.00179848	11	0.0265233	25	0.00173075	11	0.00126666	10	0.0022244	11	0.00130963	5	0.00314901	9	0.00184392	18	0.00425639	18	0.00131623	9	0.00668485
go	GO:0006814	sodium ion transport	0.00175239	5	0.000970354	9	0.00107766	4	0.00113729	4	0.00116833	4	0.00154483	9	0.000940905	2	0.000561839	2	0.000181496	3	0.00502048	9	0.00133197	5	0.00110698	4	0.00147703	8	0.000758868	4	0.00674562	8	0.00109466	6	0.000819776	3	0.00121809	3	0.00120901	4	0.000624258	2	0.00114992	10	0.00128944	7	0.000928635	6	0.00111852
go	GO:0006824	cobalt ion transport																			0.000110232	1											0.000167314	2
go	GO:0006825	copper ion transport																			0.000110232	1											0.000167314	2
go	GO:0006829	zinc ion transport																			0.000110232	1											0.000167314	2
go	GO:0006869	lipid transport	0.00182541	3			0.00139333	1			0.0044742	1							2.43548e-05	1																	0.000940697	1	0.000499405	1	3.77261e-05	1
go	GO:0006950	response to stress	0.00378723	10	0.000822171	5	0.0010152	4	0.00386834	6	0.00204541	6	0.000666004	4	0.00695516	9	0.000528632	2	0.000791539	3	0.00590546	6	0.000824061	3	0.0105346	15	0.000272719	3	0.000347304	2	0.000787347	2	0.0017768	7	0.000258073	3	0.000109133	3	0.00134089	5	0.000215483	2	0.00142248	5	0.00123822	7	0.000987052	5	0.000314385
go	GO:0006952	defense response	0.00378723	10	0.00067984	3	0.000986463	3	0.00373259	4	0.00204541	6	0.000603887	2	0.00695516	9	0.000528632	2	0.000739774	2	0.00526466	2	0.000824061	3	0.0100864	9	0.000238175	2	0.000347304	2	0.000361382	1	0.00158752	4	0.00023559	2	7.58042e-05	2	0.00114671	2	0.000215483	2	0.00133913	4	0.00062094	2	0.000749378	3	0.000314385
go	GO:0006955	immune response	0.000246748	1	0.000572027	2	0.000824757	2	0.00357746	3	5.67988e-05	1	0.000479807	1	8.86781e-05	1	0.000165931	1	0.000712414	1	0.00426949	1	0.000663748	2	0.000479855	1	0.000183679	1	0.000241902	1	0.000361382	1	0.0013035	3	0.000201749	1	5.20635e-05	1	0.00108121	1	0.000137512	1	0.00125162	3	0.000343006	1	0.000662021	2	0.000176012
go	GO:0006959	humoral immune response	0.000246748	1	0.000572027	2	0.000824757	2	0.00357746	3	5.67988e-05	1	0.000479807	1	8.86781e-05	1	0.000165931	1	0.000712414	1	0.00426949	1	0.000663748	2	0.000479855	1	0.000183679	1	0.000241902	1	0.000361382	1	0.0013035	3	0.000201749	1	5.20635e-05	1	0.00108121	1	0.000137512	1	0.00125162	3	0.000343006	1	0.000662021	2	0.000176012
go	GO:0007165	signal transduction	6.93947e-05	1	5.04295e-05	1					4.23851e-05	1			0.000223505	3	7.85041e-05	3			0.000375195	3	0.000757019	5	0.000220113	3	4.79669e-05	1	0.00102325	2	0.000202466	1	4.68795e-05	1	0.000492482	1	5.4223e-05	1	2.6877e-05	1	0.000117211	1	0.000157598	2	0.000158927	3	6.37742e-05	2	0.000339199
go	GO:0008047	enzyme activator activity	0.000322484	1	0.000934504	5	0.000774415	7			0	0	8.34046e-05	1	0.000165355	1	0.000447414	2							0.0013103	5	0.000210193	2			5.26639e-05	1	2.05429e-05	1	9.10639e-05	2	0.000509198	4			0.000169178	1			1.72251e-05	1			0.000771104
go	GO:0008080	N-acetyltransferase activity							6.58502e-05	1			0.000190542	1	1.01021e-05	1											1.12343e-05	1
go	GO:0008104	protein localization	0.000237078	3	0.00027457	5	0.000223299	2	0.00105589	3	0.000450642	2	0.000575422	4	0.000695135	3	0.000539738	5			4.15405e-05	1	0.000836681	4	0.000140243	3	0.00014271	1	0.000193286	2	0.000591479	3	0.000911702	4	0.000630584	6	0.000442935	5	0	0	0.000240228	3	0.000622232	7	0.000300173	3	0.000382157	5	0
go	GO:0008150	biological_process	0.516661	1402	0.500423	2044	0.488041	1934	0.483315	1760	0.510811	1333	0.494333	2051	0.493643	1435	0.486535	1423	0.572075	1880	0.436744	1180	0.529253	1558	0.517185	1447	0.465669	1653	0.475145	1587	0.438903	751	0.476177	1644	0.533754	1785	0.569423	2181	0.438554	1822	0.507651	1740	0.453047	2305	0.507238	1662	0.509717	1865	0.53091
go	GO:0008152	metabolic process	0.379028	1107	0.425805	1728	0.433908	1639	0.401422	1479	0.391167	1057	0.425859	1775	0.373025	1160	0.348658	1092	0.486107	1603	0.315556	929	0.425332	1290	0.39765	1205	0.38793	1401	0.381215	1309	0.302981	553	0.385886	1343	0.434071	1486	0.46672	1813	0.358208	1532	0.406229	1450	0.400165	2032	0.417028	1373	0.42587	1577	0.414845
go	GO:0008168	methyltransferase activity	0	0	4.41519e-05	1	5.54617e-05	1					1.95688e-05	1					0.000322165	3	0.000871479	5			6.98782e-05	1	0.000120471	3			0.000272284	2					0.000154674	2	9.00204e-05	2			0.00050577	7	0.000113506	1	0.000185714	2	5.61192e-05
go	GO:0008177	succinate dehydrogenase (quinone) activity	1.40882e-05	1					0.000807677	1																																	9.49567e-05	1			9.74284e-05	1
go	GO:0008233	peptidase activity			7.97805e-05	1			0.000261468	3	4.17785e-05	1	0.00012101	2	0.000324884	4	0.000539852	5	9.6894e-05	2	0.000887121	5	0.00108226	6	0.00048047	2			0.000140235	3	0.000460125	2	5.73284e-05	2	0.000325677	3	0.000124108	2	0.000311709	2	0.000316852	4	2.68697e-05	2	0.000145303	2			0.00104536
go	GO:0008238	exopeptidase activity							0.000261468	3	4.17785e-05	1	0.00012101	2	0.000324884	4	9.92548e-05	3	4.49331e-05	1	0.000715131	4	0.000933027	4	0.00048047	2			0.000140235	3	0.000460125	2	5.73284e-05	2	1.76356e-05	1	0.000124108	2	3.56725e-05	1	7.56387e-05	1			0.000112112	1			0.00104536
go	GO:0008270	zinc ion binding	0.000606222	3	0.00113533	6	0.00112585	6	0.00104928	3	0.00094084	6	0.000585817	6	0.00194154	14	0.00344629	8	5.17646e-05	1	0.000849472	5	0.00224931	11	0.000714055	4	0.000523215	5	6.36491e-05	2	0.00122356	5	0.00104147	5	1.76356e-05	1	0.000231605	2	0.00342663	14	0.00241252	6	0.000692623	7	0.00302236	5	0.000542113	6	0.000136522
go	GO:0008289	lipid binding	0.0035778	8	0.000994173	6	0.00241552	4	0.000998683	3	0.00564253	5	0.00154483	9	0.000940905	2	0.000561839	2	0.000194698	3	0.00448998	6	0.00128558	4	0.000843158	2	0.00124954	4	0.000726017	3	0.00631208	7	0.00106005	5	0.000819776	3	0.00161745	3	0.00170841	5	0.000661985	3	0.000848537	5	0.00125467	6	0.000688235	2	0.00108393
go	GO:0008324	monoatomic cation transmembrane transporter activity	0.00941982	17	0.00607232	35	0.00790138	41	0.0093539	35	0.0107436	28	0.00821249	34	0.00967953	17	0.00742412	22	0.00555395	19	0.00846928	23	0.00484367	21	0.00821867	29	0.00349848	19	0.00641373	26	0.030312	31	0.010578	32	0.00719164	29	0.00476997	23	0.00452545	17	0.00639838	24	0.00384555	35	0.0102418	34	0.00812722	23	0.00902798
go	GO:0008360	regulation of cell shape																					0	0
go	GO:0008410	CoA-transferase activity	2.28673e-05	1	0.000207372	4	0.000581882	2	0.000145244	2	9.5274e-05	2	0.000156729	1	0.000567218	4	4.17012e-05	2	0.000120227	1	0	0					0.000139702	1	0.000134528	2	0	0	0.00019529	4	0.000625829	2			2.42025e-05	1	0.000186743	2	0.000251543	5	7.93002e-05	2	0.000248679	4	0.000257349
go	GO:0008422	beta-glucosidase activity			6.02821e-05	1	4.54351e-05	1	0.000155815	2									0.000823931	3					0.000107291	1	5.77215e-05	1					3.45648e-05	1	0	0	3.51371e-05	1			6.72318e-05	1	3.22038e-05	1	4.67509e-05	1	0.000306307	1	0
go	GO:0008443	phosphofructokinase activity			0.000569802	7	2.85827e-05	1	0.000242153	1	6.4843e-05	1	3.60795e-05	2			0.00117947	7	0.000293974	5			0.00011082	1	0.000163392	1			0.000513479	4	0	0	3.69564e-05	2	2.07151e-05	1	3.81445e-05	1	0.000124725	3	0.000121244	3			0.000159903	3			0.000653817
go	GO:0008483	transaminase activity	6.8372e-05	2	0.000582712	9	0.00119201	8	0.000634195	4	0.000391438	3	0.000785677	4	0.000312955	4	0.000228625	4	0.000137701	2	0.00169913	10	0.00112002	3	3.94905e-05	2	0.000970464	5	9.68637e-05	1	0.000243891	1	9.51033e-05	3	8.70124e-05	2	0.000277116	6	0.000784936	9	0.00108173	9	0.000405664	6	0.000310302	3	0.000451965	5	0.000354814
go	GO:0008551	P-type cadmium transporter activity																			0.000110232	1											0.000167314	2
go	GO:0008553	P-type proton-exporting transporter activity	0.00175239	5	0.000836136	5	0.00102219	3	0.000998683	3	0.00116833	4	0.00154483	9	0.000940905	2	0.000561839	2	0.000170343	2	0.00448998	6	0.00128558	4	0.000843158	2	0.00124954	4	0.000726017	3	0.00631208	7	0.00106005	5	0.000819776	3	0.000676757	2	0.00120901	4	0.000624258	2	0.000848537	5	0.00125467	6	0.000688235	2	0.00108393
go	GO:0008565	obsolete protein transporter activity
go	GO:0008610	lipid biosynthetic process	0.00437137	4	0.000230178	6	0.00103252	8	0.00393796	14	4.87794e-05	1	0.00369028	11	0.00428838	4	0.000759093	3	0.000320918	4	0.00293488	8	0.000942546	6	0.00519911	7	0.00261719	9	0.000510929	3	0.0015815	4	0.00315767	7	0.00397006	4	0.00358146	8	0.0013908	15	0.000244012	2	0.00343032	15	0.00114328	3	0.000477728	6	0.00152832
go	GO:0008643	carbohydrate transport	0.00818981	15	0.00210388	22	0.00211162	20	0.00420806	22	0.00968682	21	0.00821944	37	0.0106671	24	0.00775629	28	0.00637657	26	0.00456658	12	0.00349349	19	0.00791078	33	0.00118127	12	0.00576602	27	0.00517792	10	0.00824891	19	0.00608947	22	0.0048898	30	0.00327533	13	0.00345268	17	0.0055905	22	0.00864334	25	0.00752583	24	0.00591633
go	GO:0008652	amino acid biosynthetic process			8.74568e-05	1			0.000170157	4					1.01021e-05	1	0.000592147	2	3.66437e-05	1	0.00146753	5	0.000296927	3			0.000617657	6	0.000106623	3	0.000261593	3					0.000303092	4	0.000869471	9	0.000137171	2	0.000161129	4	0.00027134	2	8.72528e-06	1	0.000199066
go	GO:0008675	2-dehydro-3-deoxy-phosphogluconate aldolase activity	7.41602e-05	1	6.19366e-05	1	0.000471832	5	0.000218068	3					0.000140759	2	0	0	0.000648214	1			9.46912e-05	1	4.41586e-05	1	0.000317442	4	0.000502092	3			0.000145838	2	0.000587271	2			0.000151386	1	0.000152222	2	0.000116482	2	0.000171887	3			0.000233102
go	GO:0008690	3-deoxy-manno-octulosonate cytidylyltransferase activity
go	GO:0008691	3-hydroxybutyryl-CoA dehydrogenase activity			0.00349538	2	0.00325653	1	0.00153045	1	0.00600191	1	0.000947432	1	0.00708404	1	0.00742041	2			0.000897322	2			0.000235465	2	0.000238432	1	0.00448421	1	0.00478946	2	7.23253e-05	2	0.00274191	1	7.78158e-05	1	0.00268381	2	0.00289699	2	0.00163737	1					0.00424605
go	GO:0008703	5-amino-6-(5-phosphoribosylamino)uracil reductase activity	0.000111053	2																																					5.97855e-05	1
go	GO:0008706	6-phospho-beta-glucosidase activity			6.02821e-05	1													2.27487e-05	1					0.000107291	1							3.45648e-05	1	0	0	3.51371e-05	1									0.000306307	1
go	GO:0008736	L-fucose isomerase activity	0.00013199	1	0.00028604	2					0	0	1.76233e-05	1	2.03511e-05	1	0.000127168	1			0.0014515	2	0.000179284	1	0.00024712	2	0.000108996	1			0.000915834	3	6.82975e-05	1	0	0					7.76801e-05	1	0.000100031	1			0.00051374	3	4.51478e-05
go	GO:0008745	N-acetylmuramoyl-L-alanine amidase activity																			0.000433753	1
go	GO:0008757	S-adenosylmethionine-dependent methyltransferase activity	0	0	4.41519e-05	1							0	0													3.62541e-05	1									6.09595e-05	1	9.00204e-05	2			0.000112715	1	0.000113506	1			5.61192e-05
go	GO:0008763	UDP-N-acetylmuramate-L-alanine ligase activity			2.2254e-05	1													0.000165313	2					3.5822e-05	1											1.49834e-05	1	0.000211556	1	7.0556e-05	2							5.29823e-05
go	GO:0008765	UDP-N-acetylmuramoylalanyl-D-glutamate-2,6-diaminopimelate ligase activity			0.000116392	1																	5.6979e-05	1
go	GO:0008766	UDP-N-acetylmuramoylalanyl-D-glutamyl-2,6-diaminopimelate-D-alanyl-D-alanine ligase activity
go	GO:0008767	UDP-galactopyranose mutase activity					0.000123341	1											0.00022074	3													7.52097e-05	2							8.49822e-06	1
go	GO:0008776	acetate kinase activity	0.000334823	3			0.000505247	6	9.35984e-05	1	0.000135808	1	0.000519938	3	0.000565881	7	0	0	7.79439e-05	3	0.000396769	3	0.000306965	3			0.000781862	7	7.32467e-05	1	0.00124026	4	0.000673194	3	0	0			0.00198637	7	0.000690074	8	0.000369947	3	0.00229468	5	0.000401536	5	0.000142656
go	GO:0008789	altronate dehydratase activity							8.08542e-05	1			0.000185827	2	4.57338e-05	1	0.000190373	1			0.00030392	1	0.00103879	6			0.000178514	1	0.000163609	2	0.000150769	1	0	0			0.000232674	3	0.000503489	7	0.000509246	5	0.000329381	4	5.43231e-05	1	0.00017155	3	0.000157129
go	GO:0008790	arabinose isomerase activity	0.00013199	1	0.000270943	1					0	0					0.000127168	1			0.000104503	1	0.000179284	1	0.00024712	2					0.000795685	2											0.000100031	1
go	GO:0008804	carbamate kinase activity							0.000212631	1	0.000176502	1	9.41008e-05	3			4.06525e-05	1							0.000140691	2	0.000220345	2	0.00049482	2			0	0			0.000413095	2			0.000149579	2
go	GO:0008814	citrate CoA-transferase activity																			0	0																			0.000186743	2
go	GO:0008815	citrate (pro-3S)-lyase activity
go	GO:0008835	diaminohydroxyphosphoribosylaminopyrimidine deaminase activity	0.000111053	2
go	GO:0008840	4-hydroxy-tetrahydrodipicolinate synthase activity	8.92917e-05	1	7.14781e-05	1	1.72541e-05	1	0.000378131	5			3.47996e-05	1	0.00059129	4	4.57824e-05	1			9.24272e-05	1	1.12411e-05	1							0.000818635	2	0.000100406	2					0.000944202	8	0.00035556	6	5.48957e-05	1	7.51402e-05	2	0.000127076	1
go	GO:0008861	formate C-acetyltransferase activity	0.000921518	4	0.00138457	8	0.00248461	12	0.00102713	4	0.000117375	2	0.00138722	5	0.00181587	8	0.00113151	4	0.000259895	3	0.000625825	2	0.000526573	3	0.000464537	3	0.00297529	6	0.000654679	4	0.00112169	3	0.00255237	7	0.000534399	4	0.000950718	9	0.00157607	8	0.000988707	6	0.00560554	15	0.00167711	7	0.00291482	8	0.00235904
go	GO:0008888	glycerol dehydrogenase (NAD+) activity													7.9382e-05	1	0.000100158	1			0.000402323	2	0	0							4.2481e-05	1							5.07641e-05	1							0.00010819	1	5.77333e-05
go	GO:0008966	phosphoglucosamine mutase activity							0.000224489	1							0	0					0.000217129	1					3.9022e-05	1	0.000102267	1	1.71224e-05	1					0.000168134	2					0.000131619	2
go	GO:0008967	phosphoglycolate phosphatase activity											0.000347037	1							0.000188185	1
go	GO:0008982	protein-N(PI)-phosphohistidine-sugar phosphotransferase activity	0.00520203	11	0.000983348	15	0.00124158	12	0.00357692	17	0.0076636	17	0.00526051	32	0.004506	19	0.00602525	21	0.00583029	23	0.00447739	11	0.00272522	13	0.00570596	23	0.000383814	7	0.00464541	25	0.00496319	8	0.00358208	15	0.0041855	19	0.00374847	24	0.00255318	14	0.00304922	13	0.00203838	17	0.00436284	18	0.00672945	22	0.00459183
go	GO:0008999	peptide-alanine-alpha-N-acetyltransferase activity											0.000190542	1
go	GO:0009007	site-specific DNA-methyltransferase (adenine-specific) activity	0	0																																			2.19902e-05	1									5.61192e-05
go	GO:0009008	DNA-methyltransferase activity	0	0																																			2.19902e-05	1									5.61192e-05
go	GO:0009011	alpha-1,4-glucan glucosyltransferase (ADP-glucose donor) activity	0.000430196	2	6.50054e-05	2															3.71077e-05	1			7.2903e-05	1							0.000146962	2											0	0	7.7211e-05	1	0.000197141
go	GO:0009039	urease activity	0.00111354	3	0.0017923	8	0.00335711	8	0.00326068	6	0.000631957	4	0.00229506	8	0.000575193	3	0.000950752	3	0.00114766	5	0.0054813	7	0.00144425	5	0.000694707	5	0.00225383	6	0.000556814	2	0.000814773	2	0.000583098	3	0.00165171	8	0.000821224	4	0.000884111	3	0.000269967	2	0.000807737	5	0.000540757	4	0.00124246	5	0.0010429
go	GO:0009056	catabolic process	0.00301436	12	0.00341154	31	0.00500703	23	0.00354688	10	0.00132796	10	0.00366024	18	0.00298594	17	0.0058507	26	0.00241786	24	0.00671757	12	0.00407914	16	0.00931973	27	0.00387543	18	0.000876799	7	0.00848164	11	0.00161085	13	0.00279704	19	0.00120099	14	0.00150465	15	0.00342774	16	0.00287039	25	0.00288507	26	0.00193043	12	0.00220278
go	GO:0009057	macromolecule catabolic process	0.000324755	4	0.000654118	10	0.000149298	2	0.000158388	3	0.000307095	2	8.83793e-05	3	0.000430259	5	0.00128611	11	0.000921954	14	0.000680828	2	0.000461269	2	0.0019402	8	0.000738694	8	0.000224585	3	0.00415188	2	0.000910349	8	0.0010832	9	0.000176183	4	0.000105075	2	0.000557681	6	0.00169982	13	0.000499014	7	0.000539373	5	7.55045e-05
go	GO:0009058	biosynthetic process	0.364435	1032	0.400574	1583	0.391149	1504	0.381658	1374	0.372584	990	0.406556	1662	0.348672	1053	0.321244	986	0.474269	1494	0.277425	841	0.398034	1176	0.377814	1122	0.365005	1292	0.363284	1218	0.276794	494	0.366507	1220	0.414725	1398	0.447557	1679	0.325753	1371	0.381729	1321	0.368484	1844	0.392783	1269	0.411435	1470	0.383709
go	GO:0009059	macromolecule biosynthetic process	0.35577	1010	0.395829	1547	0.385601	1463	0.375769	1345	0.369626	968	0.400155	1630	0.338695	1021	0.316739	960	0.472773	1480	0.267309	812	0.393273	1143	0.370319	1107	0.35492	1237	0.360785	1199	0.248173	453	0.361361	1194	0.409741	1388	0.441767	1646	0.320024	1322	0.378529	1292	0.36118	1789	0.385111	1228	0.409558	1452	0.376728
go	GO:0009064	glutamine family amino acid metabolic process							6.58502e-05	1					1.01021e-05	1	6.70423e-05	1									1.12343e-05	1									4.85117e-05	1	5.09865e-05	1
go	GO:0009066	aspartate family amino acid metabolic process							2.79852e-05	1							8.06517e-05	1	0.000322165	3	0.00102714	3					8.42165e-05	2			3.358e-05	1							0.000128822	1	0.000109472	1			0.00027134	2	8.72528e-06	1
go	GO:0009067	aspartate family amino acid biosynthetic process							2.79852e-05	1							8.06517e-05	1			0.000924505	2					8.42165e-05	2			3.358e-05	1							0.000128822	1	0.000109472	1			0.000239796	1	8.72528e-06	1
go	GO:0009069	serine family amino acid metabolic process			0.000741032	3	0.000977405	6	0.000104887	3					0.00018612	1			3.66437e-05	1	0.000495134	2					0.000718867	3	0.000538705	2	0.000320148	3	4.1914e-05	1			0.00154696	8	0.000267647	2	0.000549306	5	0.00017978	4	3.15438e-05	1			0.000428318
go	GO:0009070	serine family amino acid biosynthetic process			8.74568e-05	1			3.5177e-05	1									3.66437e-05	1	0.000495134	2					0.000494088	2			0.000228013	2					0.000128066	1	0.000267647	2			0.000154865	3	3.15438e-05	1			0
go	GO:0009081	branched-chain amino acid metabolic process	0.00132545	6	0.00206775	8	0.00151853	5			0.00131623	9	0.000534829	4	0.000842709	4	0.000702422	5	7.0397e-05	1			0.000471239	6			0.00297508	15	3.13618e-05	1	0.00155075	8	1.59092e-05	1	0	0	0.000661601	6	0.000507141	3	0.000459549	3	0.00172017	9	0.0033425	10	0.00013098	2	0.000217414
go	GO:0009082	branched-chain amino acid biosynthetic process	0.00132545	6	0.00206775	8	0.00151853	5			0.00131623	9	0.000534829	4	0.000842709	4	0.000702422	5	7.0397e-05	1			0.000471239	6			0.00297508	15	3.13618e-05	1	0.00155075	8	1.59092e-05	1	0	0	0.000661601	6	0.000507141	3	0.000459549	3	0.00172017	9	0.0033425	10	0.00013098	2	0.000217414
go	GO:0009084	glutamine family amino acid biosynthetic process							6.58502e-05	1					1.01021e-05	1											1.12343e-05	1
go	GO:0009086	methionine biosynthetic process															8.06517e-05	1									8.42165e-05	2			3.358e-05	1							0.000128822	1					0.000239796	1	8.72528e-06	1
go	GO:0009092	homoserine metabolic process			0.000653575	2	0.000977405	6	6.97097e-05	2					0.00018612	1											0.000224779	1	0.000538705	2	9.21347e-05	1	4.1914e-05	1			0.00141889	7			0.000279189	3	2.49143e-05	1					0.000428318
go	GO:0009110	vitamin biosynthetic process	0.00113943	6	6.83184e-05	2	0.000100425	2	0.000388664	1	8.4846e-05	1	8.53955e-05	2	0.00107816	5	0.000213846	2					0	0	0	0	0.000415293	4	2.33993e-05	1	0.0072486	5	0.000266364	3	0	0	6.79341e-05	3	0.000661356	5	8.21591e-05	3	0.000108057	3	0.000133556	3	0.000263509	2	5.78553e-05
go	GO:0009112	nucleobase metabolic process			0	0	5.45745e-05	2	0.000127808	1	2.78541e-05	1			0.000469482	2											0.000130696	3			9.16333e-05	1	6.25099e-05	1					2.15605e-05	1	0.000369702	4			4.50203e-05	1
go	GO:0009113	purine nucleobase biosynthetic process			0	0	5.45745e-05	2							0.000469482	2											3.73696e-05	1			9.16333e-05	1							2.15605e-05	1	0.000210149	3			0	0
go	GO:0009117	nucleotide metabolic process	0.00325682	9	0.00207051	19	0.00287873	25	0.00117043	7	0.00173152	11	0.00296278	19	0.00349662	18	0.00498181	20	0.00137071	12	0.00523766	12	0.00378324	20	0.00757707	15	0.00354932	17	0.00127049	10	0.00784637	16	0.0016761	15	0.00103997	7	0.00102298	13	0.00256215	22	0.00367165	16	0.00140126	17	0.00352034	24	0.000940106	7	0.0042673
go	GO:0009123	nucleoside monophosphate metabolic process			3.04431e-05	2	8.75036e-05	2	0	0			0.000202242	1			0.000251645	2					0.000182802	3			5.26269e-05	1			0.000350277	1	0.000224453	5			0.000121774	4	0.00057771	4	0.000482659	3	9.16304e-05	1	5.96498e-05	1			0.000371479
go	GO:0009124	nucleoside monophosphate biosynthetic process			3.04431e-05	2	8.75036e-05	2	0	0			0.000202242	1			0.000251645	2					0.000182802	3			5.26269e-05	1			0.000350277	1	0.000205143	4			0.000121774	4	0.00057771	4	0.000482659	3	9.16304e-05	1	5.96498e-05	1			0.000371479
go	GO:0009126	purine nucleoside monophosphate metabolic process			3.04431e-05	2	8.75036e-05	2	0	0			0.000202242	1			0.000251645	2					0.000182802	3							0.000350277	1	0.000161943	4			8.34744e-05	3	0.00057771	4	0.000482659	3	9.16304e-05	1	5.96498e-05	1			0.000371479
go	GO:0009127	purine nucleoside monophosphate biosynthetic process			3.04431e-05	2	8.75036e-05	2	0	0			0.000202242	1			0.000251645	2					0.000182802	3							0.000350277	1	0.000142633	3			8.34744e-05	3	0.00057771	4	0.000482659	3	9.16304e-05	1	5.96498e-05	1			0.000371479
go	GO:0009132	nucleoside diphosphate metabolic process	0.00142773	3	0.000663282	8	0.00113777	10			0.000388911	4	0.00114584	6	0.00158277	8	0.0035468	11	0.000348245	5	0.000452813	2	0.00163167	7	0.00650624	12	0.000773859	2	9.54006e-05	2	0.000331621	2	0	0	6.21318e-05	2	0.000120769	3	0.000251005	6	0.00218839	5	0.000117348	4	0.00083926	7	3.00672e-05	1	8.97674e-05
go	GO:0009134	nucleoside diphosphate catabolic process	0.00142773	3	0.000663282	8	0.00113777	10			0.000388911	4	0.00114584	6	0.00158277	8	0.0035468	11	0.000348245	5	0.000452813	2	0.00163167	7	0.00650624	12	0.000773859	2	9.54006e-05	2	0.000331621	2	0	0	6.21318e-05	2	0.000120769	3	0.000251005	6	0.00218839	5	0.000117348	4	0.00083926	7	3.00672e-05	1	8.97674e-05
go	GO:0009135	purine nucleoside diphosphate metabolic process	0.00142773	3	0.000663282	8	0.00113777	10			0.000388911	4	0.00114584	6	0.00158277	8	0.0035468	11	0.000348245	5	0.000452813	2	0.00163167	7	0.00650624	12	0.000773859	2	9.54006e-05	2	0.000331621	2	0	0	6.21318e-05	2	0.000120769	3	0.000251005	6	0.00218839	5	0.000117348	4	0.00083926	7	3.00672e-05	1	8.97674e-05
go	GO:0009137	purine nucleoside diphosphate catabolic process	0.00142773	3	0.000663282	8	0.00113777	10			0.000388911	4	0.00114584	6	0.00158277	8	0.0035468	11	0.000348245	5	0.000452813	2	0.00163167	7	0.00650624	12	0.000773859	2	9.54006e-05	2	0.000331621	2	0	0	6.21318e-05	2	0.000120769	3	0.000251005	6	0.00218839	5	0.000117348	4	0.00083926	7	3.00672e-05	1	8.97674e-05
go	GO:0009141	nucleoside triphosphate metabolic process	0.00318013	8	0.0018764	15	0.00263918	20	0.00108184	5	0.00173152	11	0.00296278	19	0.00343131	15	0.00477328	17	0.00137071	12	0.00514359	11	0.00360044	17	0.0073494	14	0.00329029	14	0.00127049	10	0.00685101	10	0.00147096	11	0.00103997	7	0.00088244	9	0.00188926	14	0.00309569	11	0.00128745	15	0.00305093	22	0.000940106	7	0.00329341
go	GO:0009142	nucleoside triphosphate biosynthetic process	0.00175239	5	0.00121312	7	0.00143066	9	0.00108184	5	0.00134261	7	0.00201918	14	0.00184853	7	0.00145526	7	0.00102246	7	0.00469078	9	0.00196877	10	0.000843158	2	0.00251643	12	0.00117508	8	0.00651939	8	0.00145165	10	0.000977838	5	0.00073952	5	0.00163825	8	0.0009073	6	0.00107658	10	0.00221167	15	0.000910039	6	0.00320364
go	GO:0009144	purine nucleoside triphosphate metabolic process	0.00318013	8	0.0018764	15	0.00263918	20	0.00108184	5	0.00173152	11	0.00296278	19	0.00343131	15	0.00477328	17	0.00137071	12	0.00514359	11	0.00360044	17	0.0073494	14	0.00329029	14	0.00127049	10	0.00685101	10	0.00147096	11	0.00103997	7	0.00088244	9	0.00188926	14	0.00309569	11	0.00128745	15	0.00305093	22	0.000940106	7	0.00329341
go	GO:0009145	purine nucleoside triphosphate biosynthetic process	0.00175239	5	0.00121312	7	0.00143066	9	0.00108184	5	0.00134261	7	0.00201918	14	0.00184853	7	0.00145526	7	0.00102246	7	0.00469078	9	0.00196877	10	0.000843158	2	0.00251643	12	0.00117508	8	0.00651939	8	0.00145165	10	0.000977838	5	0.00073952	5	0.00163825	8	0.0009073	6	0.00107658	10	0.00221167	15	0.000910039	6	0.00320364
go	GO:0009150	purine ribonucleotide metabolic process	0.00318013	8	0.00190685	17	0.00272669	22	0.00117043	7	0.00173152	11	0.00296278	19	0.00343131	15	0.00479615	18	0.00137071	12	0.00514359	11	0.00378324	20	0.0073494	14	0.00329029	14	0.00127049	10	0.00720129	11	0.00161359	14	0.00103997	7	0.000943763	11	0.00246697	18	0.00357835	14	0.00137908	16	0.00311058	23	0.000940106	7	0.00366489
go	GO:0009152	purine ribonucleotide biosynthetic process	0.00175239	5	0.00124356	9	0.00151816	11	0.00108184	5	0.00134261	7	0.00201918	14	0.00184853	7	0.00147813	8	0.00102246	7	0.00469078	9	0.00215158	13	0.000843158	2	0.00251643	12	0.00117508	8	0.00686967	9	0.00159428	13	0.000977838	5	0.000822994	8	0.00221596	12	0.00138996	9	0.00116821	11	0.00227132	16	0.000910039	6	0.00357512
go	GO:0009154	purine ribonucleotide catabolic process	0.00142773	3	0.000663282	8	0.00113777	10			0.000388911	4	0.00114584	6	0.00158277	8	0.0035468	11	0.000348245	5	0.000452813	2	0.00163167	7	0.00650624	12	0.000773859	2	9.54006e-05	2	0.000331621	2	0	0	6.21318e-05	2	0.000120769	3	0.000251005	6	0.00218839	5	0.000117348	4	0.00083926	7	3.00672e-05	1	8.97674e-05
go	GO:0009156	ribonucleoside monophosphate biosynthetic process			3.04431e-05	2	8.75036e-05	2	0	0			0.000202242	1			0.000251645	2					0.000182802	3			5.26269e-05	1			0.000350277	1	0.000205143	4			0.000121774	4	0.00057771	4	0.000482659	3	9.16304e-05	1	5.96498e-05	1			0.000371479
go	GO:0009161	ribonucleoside monophosphate metabolic process			3.04431e-05	2	8.75036e-05	2	0	0			0.000202242	1			0.000251645	2					0.000182802	3			5.26269e-05	1			0.000350277	1	0.000224453	5			0.000121774	4	0.00057771	4	0.000482659	3	9.16304e-05	1	5.96498e-05	1			0.000371479
go	GO:0009165	nucleotide biosynthetic process	0.00182908	6	0.00137705	10	0.0016702	14	0.00108184	5	0.00134261	7	0.00201918	14	0.00188649	9	0.00147813	8	0.00102246	7	0.00478485	10	0.00215158	13	0.00107082	3	0.00277546	15	0.00117508	8	0.00751475	14	0.00165679	14	0.000977838	5	0.000880061	9	0.00231114	16	0.00148325	11	0.00119038	12	0.00227132	16	0.000910039	6	0.00414994
go	GO:0009166	nucleotide catabolic process	0.00142773	3	0.000663282	8	0.00113777	10			0.000388911	4	0.00114584	6	0.00158277	8	0.0035468	11	0.000348245	5	0.000452813	2	0.00163167	7	0.00650624	12	0.000773859	2	9.54006e-05	2	0.000331621	2	0	0	6.21318e-05	2	0.00014292	4	0.000251005	6	0.00218839	5	0.000117348	4	0.00083926	7	3.00672e-05	1	8.97674e-05
go	GO:0009167	purine ribonucleoside monophosphate metabolic process			3.04431e-05	2	8.75036e-05	2	0	0			0.000202242	1			0.000251645	2					0.000182802	3							0.000350277	1	0.000161943	4			8.34744e-05	3	0.00057771	4	0.000482659	3	9.16304e-05	1	5.96498e-05	1			0.000371479
go	GO:0009168	purine ribonucleoside monophosphate biosynthetic process			3.04431e-05	2	8.75036e-05	2	0	0			0.000202242	1			0.000251645	2					0.000182802	3							0.000350277	1	0.000142633	3			8.34744e-05	3	0.00057771	4	0.000482659	3	9.16304e-05	1	5.96498e-05	1			0.000371479
go	GO:0009179	purine ribonucleoside diphosphate metabolic process	0.00142773	3	0.000663282	8	0.00113777	10			0.000388911	4	0.00114584	6	0.00158277	8	0.0035468	11	0.000348245	5	0.000452813	2	0.00163167	7	0.00650624	12	0.000773859	2	9.54006e-05	2	0.000331621	2	0	0	6.21318e-05	2	0.000120769	3	0.000251005	6	0.00218839	5	0.000117348	4	0.00083926	7	3.00672e-05	1	8.97674e-05
go	GO:0009181	purine ribonucleoside diphosphate catabolic process	0.00142773	3	0.000663282	8	0.00113777	10			0.000388911	4	0.00114584	6	0.00158277	8	0.0035468	11	0.000348245	5	0.000452813	2	0.00163167	7	0.00650624	12	0.000773859	2	9.54006e-05	2	0.000331621	2	0	0	6.21318e-05	2	0.000120769	3	0.000251005	6	0.00218839	5	0.000117348	4	0.00083926	7	3.00672e-05	1	8.97674e-05
go	GO:0009185	ribonucleoside diphosphate metabolic process	0.00142773	3	0.000663282	8	0.00113777	10			0.000388911	4	0.00114584	6	0.00158277	8	0.0035468	11	0.000348245	5	0.000452813	2	0.00163167	7	0.00650624	12	0.000773859	2	9.54006e-05	2	0.000331621	2	0	0	6.21318e-05	2	0.000120769	3	0.000251005	6	0.00218839	5	0.000117348	4	0.00083926	7	3.00672e-05	1	8.97674e-05
go	GO:0009191	ribonucleoside diphosphate catabolic process	0.00142773	3	0.000663282	8	0.00113777	10			0.000388911	4	0.00114584	6	0.00158277	8	0.0035468	11	0.000348245	5	0.000452813	2	0.00163167	7	0.00650624	12	0.000773859	2	9.54006e-05	2	0.000331621	2	0	0	6.21318e-05	2	0.000120769	3	0.000251005	6	0.00218839	5	0.000117348	4	0.00083926	7	3.00672e-05	1	8.97674e-05
go	GO:0009199	ribonucleoside triphosphate metabolic process	0.00318013	8	0.0018764	15	0.00263918	20	0.00108184	5	0.00173152	11	0.00296278	19	0.00343131	15	0.00477328	17	0.00137071	12	0.00514359	11	0.00360044	17	0.0073494	14	0.00329029	14	0.00127049	10	0.00685101	10	0.00147096	11	0.00103997	7	0.000860288	8	0.00188926	14	0.00309569	11	0.00128745	15	0.00305093	22	0.000940106	7	0.00329341
go	GO:0009201	ribonucleoside triphosphate biosynthetic process	0.00175239	5	0.00121312	7	0.00143066	9	0.00108184	5	0.00134261	7	0.00201918	14	0.00184853	7	0.00145526	7	0.00102246	7	0.00469078	9	0.00196877	10	0.000843158	2	0.00251643	12	0.00117508	8	0.00651939	8	0.00145165	10	0.000977838	5	0.00073952	5	0.00163825	8	0.0009073	6	0.00107658	10	0.00221167	15	0.000910039	6	0.00320364
go	GO:0009205	purine ribonucleoside triphosphate metabolic process	0.00318013	8	0.0018764	15	0.00263918	20	0.00108184	5	0.00173152	11	0.00296278	19	0.00343131	15	0.00477328	17	0.00137071	12	0.00514359	11	0.00360044	17	0.0073494	14	0.00329029	14	0.00127049	10	0.00685101	10	0.00147096	11	0.00103997	7	0.000860288	8	0.00188926	14	0.00309569	11	0.00128745	15	0.00305093	22	0.000940106	7	0.00329341
go	GO:0009206	purine ribonucleoside triphosphate biosynthetic process	0.00175239	5	0.00121312	7	0.00143066	9	0.00108184	5	0.00134261	7	0.00201918	14	0.00184853	7	0.00145526	7	0.00102246	7	0.00469078	9	0.00196877	10	0.000843158	2	0.00251643	12	0.00117508	8	0.00651939	8	0.00145165	10	0.000977838	5	0.00073952	5	0.00163825	8	0.0009073	6	0.00107658	10	0.00221167	15	0.000910039	6	0.00320364
go	GO:0009231	riboflavin biosynthetic process	0.000111053	2	1.19406e-05	1																															6.79341e-05	3	0.000224411	2	5.97855e-05	1	3.02396e-05	1
go	GO:0009235	cobalamin metabolic process	0.00102838	4	5.63778e-05	1	3.21831e-05	1	0.000388664	1	8.4846e-05	1	8.53955e-05	2	0.00107816	5	0.000213846	2					0	0	0	0	0.000415293	4	0	0	0.0072486	5	0.000266364	3	0	0			0.000436946	3	1.83312e-05	1	7.7817e-05	2	0.000104473	2	0.000263509	2	5.78553e-05
go	GO:0009236	cobalamin biosynthetic process	0.00102838	4	5.63778e-05	1	3.21831e-05	1	0.000388664	1	8.4846e-05	1	8.53955e-05	2	0.00107816	5	0.000213846	2					0	0	0	0	0.000415293	4	0	0	0.0072486	5	0.000266364	3	0	0			0.000436946	3	1.83312e-05	1	7.7817e-05	2	0.000104473	2	0.000263509	2	5.78553e-05
go	GO:0009259	ribonucleotide metabolic process	0.00318013	8	0.00190685	17	0.00272669	22	0.00117043	7	0.00173152	11	0.00296278	19	0.00343131	15	0.00479615	18	0.00137071	12	0.00514359	11	0.00378324	20	0.0073494	14	0.00334291	15	0.00127049	10	0.00720129	11	0.0016761	15	0.00103997	7	0.000943763	11	0.00246697	18	0.00357835	14	0.00137908	16	0.00311058	23	0.000940106	7	0.00366489
go	GO:0009260	ribonucleotide biosynthetic process	0.00175239	5	0.00124356	9	0.00151816	11	0.00108184	5	0.00134261	7	0.00201918	14	0.00184853	7	0.00147813	8	0.00102246	7	0.00469078	9	0.00215158	13	0.000843158	2	0.00256905	13	0.00117508	8	0.00686967	9	0.00165679	14	0.000977838	5	0.000822994	8	0.00221596	12	0.00138996	9	0.00116821	11	0.00227132	16	0.000910039	6	0.00357512
go	GO:0009261	ribonucleotide catabolic process	0.00142773	3	0.000663282	8	0.00113777	10			0.000388911	4	0.00114584	6	0.00158277	8	0.0035468	11	0.000348245	5	0.000452813	2	0.00163167	7	0.00650624	12	0.000773859	2	9.54006e-05	2	0.000331621	2	0	0	6.21318e-05	2	0.000120769	3	0.000251005	6	0.00218839	5	0.000117348	4	0.00083926	7	3.00672e-05	1	8.97674e-05
go	GO:0009279	cell outer membrane																					3.44134e-05	1
go	GO:0009297	pilus assembly
go	GO:0009306	protein secretion			0.000155995	2	0.000148994	1	0.00101947	2			0.000471766	1	0.000389983	1							0.000565384	3			0.00014271	1			0.000165514	2	0.000852299	3	0.000435751	2	0.000296311	1					0.00041103	2			0.00023976	1
go	GO:0009317	acetyl-CoA carboxylase complex
go	GO:0009346	ATP-independent citrate lyase complex																			0	0																			0.000186743	2
go	GO:0009376	HslUV protease complex
go	GO:0009401	phosphoenolpyruvate-dependent sugar phosphotransferase system	0.00818981	15	0.00194584	21	0.00211162	20	0.00420806	22	0.00968682	21	0.00821944	37	0.0106671	24	0.00752181	26	0.00637657	26	0.00456658	12	0.00280885	14	0.00791078	33	0.00110007	11	0.00576602	27	0.00517792	10	0.00824891	19	0.00608947	22	0.0048898	30	0.00327533	13	0.00339813	16	0.00265004	21	0.00864334	25	0.00752583	24	0.00591633
go	GO:0009605	response to external stimulus	0.000449915	2	0.00067984	3	0.000986463	3	0.00373259	4	0.000129887	2	0.000603887	2	0.000126752	2	0.000528632	2	0.000739774	2	0.00526466	2	0.000858474	4	0.000559434	2	0.000238175	2	0.000347304	2	0.000361382	1	0.00158752	4	0.00023559	2	7.58042e-05	2	0.00114671	2	0.000215483	2	0.00133913	4	0.00062094	2	0.000749378	3	0.000314385
go	GO:0009607	response to biotic stimulus	0.000546954	4	0.00067984	3	0.000986463	3	0.0037867	5	0.000129887	2	0.000603887	2	0.000126752	2	0.000528632	2	0.000739774	2	0.00526466	2	0.000858474	4	0.000559434	2	0.000238175	2	0.000347304	2	0.000361382	1	0.00158752	4	0.00023559	2	7.58042e-05	2	0.00114671	2	0.000215483	2	0.00133913	4	0.00062094	2	0.000749378	3	0.000314385
go	GO:0009615	response to virus	0.000246748	1	0.000433158	1	0.000675763	1	0.00255798	1	5.67988e-05	1	0.000479807	1	8.86781e-05	1	0.000165931	1	0.000712414	1	0.00426949	1	0.000518638	2	0.000559434	2	0.000183679	1	0.000241902	1	0.000361382	1	0.000467145	1	0.000201749	1	5.20635e-05	1	0.00108121	1	0.000137512	1	0.000840586	1	0.000343006	1	0.000422261	1	0.000176012
go	GO:0009617	response to bacterium	0.000449915	2	0.00067984	3	0.000986463	3	0.00373259	4	0.000129887	2	0.000603887	2	0.000126752	2	0.000528632	2	0.000739774	2	0.00526466	2	0.000824061	3	0.000479855	1	0.000238175	2	0.000347304	2	0.000361382	1	0.00158752	4	0.00023559	2	7.58042e-05	2	0.00114671	2	0.000215483	2	0.00133913	4	0.00062094	2	0.000749378	3	0.000314385
go	GO:0009620	response to fungus	0.000449915	2	0.00067984	3	0.000986463	3	0.00373259	4	0.000129887	2	0.000603887	2	0.000126752	2	0.000528632	2	0.000739774	2	0.00526466	2	0.000824061	3	0.000479855	1	0.000238175	2	0.000347304	2	0.000361382	1	0.00158752	4	0.00023559	2	7.58042e-05	2	0.00114671	2	0.000215483	2	0.00133913	4	0.00062094	2	0.000749378	3	0.000314385
go	GO:0009888	tissue development	0.000203167	1	0.000107813	1	0.000161706	1	0.000155134	1	7.30884e-05	1	0.000124081	1	3.80744e-05	1	0.000362702	1	2.73603e-05	1	0.000995163	1	0.000160313	1			5.44959e-05	1	0.000105402	1			0.00028402	1	3.38406e-05	1	2.37407e-05	1	6.55071e-05	1	7.79711e-05	1	8.75152e-05	1	0.000277934	1	8.73573e-05	1	0.000138373
go	GO:0009889	regulation of biosynthetic process	0.00241833	19	0.00171483	28	0.00174086	25	0.00226399	16	0.00733297	28	0.00113794	14	0.00681296	31	0.00308318	30	0.00245279	35	0.019821	28	0.00329492	20	0.0295431	20	0.00274173	20	0.00512421	23	0.000716578	5	0.00826347	32	0.00325313	31	0.0036796	32	0.00500011	41	0.00254321	30	0.0123586	42	0.00335073	30	0.0015808	20	0.00241077
go	GO:0009890	negative regulation of biosynthetic process	0.000227188	2	0.000380967	6	6.58935e-05	2			0.000307095	2	7.43271e-05	2	0.000321611	4	0.00128611	11	0.000190287	7	5.90748e-05	1	0.000461269	2	0.000254583	2	0.00068796	6	0.000224585	3	0	0	0.000716553	6	0.00084529	6	0.000119657	2	0.000222566	4	0.000545726	6	0.000178849	2	0.000535033	8	0.000209865	3	7.55045e-05
go	GO:0009892	negative regulation of metabolic process	0.000834745	8	0.003103	14	0.00157123	8	0.00249183	8	0.00207305	10	0.000293168	5	0.0012793	12	0.00145766	12	0.000357514	11	0.0045026	10	0.00145351	8	0.00161312	9	0.000871749	9	0.000771667	9	0	0	0.00175264	13	0.00126277	10	0.0004797	6	0.00124109	9	0.000912914	11	0.000576551	7	0.0015519	15	0.00103324	9	0.000435703
go	GO:0009986	cell surface															0.000228774	1																											3.31907e-05	1	4.56017e-05	1
go	GO:0009987	cellular process	0.491889	1341	0.490247	1985	0.477795	1877	0.47469	1725	0.487824	1272	0.486932	2014	0.47155	1379	0.466614	1357	0.563995	1819	0.400259	1131	0.508838	1505	0.45961	1386	0.453639	1604	0.46089	1540	0.433162	741	0.461617	1587	0.515666	1716	0.550338	2107	0.422962	1742	0.493736	1687	0.438154	2228	0.490512	1596	0.500385	1813	0.516426
go	GO:0010038	response to metal ion																			0.000110232	1			7.95788e-05	1							0.000167314	2
go	GO:0010181	FMN binding	0.000348359	2	0.00017403	2	1.89336e-05	1			0.000168626	2	0.000256672	5			0.000130127	1	0.000268679	5					3.71979e-05	1	0.000145944	3	0.000162314	3	0.000292025	3	0.000500233	4	0.000105691	1			0.000602423	5	4.31379e-05	1	0.00014293	3	0.000751609	6	0	0	0.00101275
go	GO:0010466	negative regulation of peptidase activity	0.000607557	6	0.00272204	8	0.00150533	6	0.00249183	8	0.00176595	8	0.000218841	3	0.000957686	8	0.000171546	1	0.000167227	4	0.00444352	9	0.00099224	6	0.00135854	7	0.000183789	3	0.000547082	6	0	0	0.00103608	7	0.000417478	4	0.000360043	4	0.00101852	5	0.000367188	5	0.000397702	5	0.00101686	7	0.000823377	6	0.000360198
go	GO:0010468	regulation of gene expression	0.00241833	19	0.00171483	28	0.00174086	25	0.00226399	16	0.00733297	28	0.00113794	14	0.00681296	31	0.00308318	30	0.00245279	35	0.0197619	27	0.00329492	20	0.0295431	20	0.00274173	20	0.00512421	23	0.000716578	5	0.00826347	32	0.00325313	31	0.0036796	32	0.00492849	40	0.00254321	30	0.0123586	42	0.00331471	29	0.0015808	20	0.00241077
go	GO:0010556	regulation of macromolecule biosynthetic process	0.00241833	19	0.00171483	28	0.00174086	25	0.00226399	16	0.00733297	28	0.00113794	14	0.00681296	31	0.00308318	30	0.00245279	35	0.0197619	27	0.00329492	20	0.0295431	20	0.00274173	20	0.00512421	23	0.000716578	5	0.00826347	32	0.00325313	31	0.0036796	32	0.00492849	40	0.00254321	30	0.0123586	42	0.00331471	29	0.0015808	20	0.00241077
go	GO:0010558	negative regulation of macromolecule biosynthetic process	0.000227188	2	0.000380967	6	6.58935e-05	2			0.000307095	2	7.43271e-05	2	0.000321611	4	0.00128611	11	0.000190287	7			0.000461269	2	0.000254583	2	0.00068796	6	0.000224585	3	0	0	0.000716553	6	0.00084529	6	0.000119657	2	0.00015094	3	0.000545726	6	0.000178849	2	0.000499014	7	0.000209865	3	7.55045e-05
go	GO:0010564	regulation of cell cycle process	6.72998e-05	1	7.57708e-05	2	0.000150646	2			0.00032901	3	6.67438e-05	2	6.58329e-05	1	0.000507004	3	0.000218622	2			5.70819e-05	2	6.81193e-05	1	0.000230805	1	0.000225897	3			4.17513e-05	1	0.00027698	6	0.00078713	7	0	0	0.000929879	4	4.85223e-05	1	0.000459431	4	2.35868e-05	1	0.000146947
go	GO:0010605	negative regulation of macromolecule metabolic process	0.000834745	8	0.003103	14	0.00157123	8	0.00249183	8	0.00207305	10	0.000293168	5	0.0012793	12	0.00145766	12	0.000357514	11	0.00444352	9	0.00145351	8	0.00161312	9	0.000871749	9	0.000771667	9	0	0	0.00175264	13	0.00126277	10	0.0004797	6	0.00116946	8	0.000912914	11	0.000576551	7	0.00151588	14	0.00103324	9	0.000435703
go	GO:0010629	negative regulation of gene expression	0.000227188	2	0.000380967	6	4.22567e-05	1			0.000307095	2	7.43271e-05	2	0.000321611	4	0.00128611	11	0.000190287	7			0.000461269	2	0.000254583	2	0.00068796	6	0.000224585	3	0	0	0.000716553	6	0.00084529	6	0.000119657	2	0.000105075	2	0.000501299	5	0.000178849	2	0.000499014	7	0.000209865	3	7.55045e-05
go	GO:0012505	endomembrane system	0.000246748	1	0.000572027	2	0.000824757	2	0.00357746	3	5.67988e-05	1	0.000479807	1	8.86781e-05	1	0.000165931	1	0.000712414	1	0.00426949	1	0.000663748	2	0.000479855	1	0.000183679	1	0.000241902	1	0.000361382	1	0.0013035	3	0.000201749	1	5.20635e-05	1	0.00108121	1	0.000137512	1	0.00125162	3	0.000343006	1	0.000662021	2	0.000176012
go	GO:0015031	protein transport	0.000237078	3	0.00027457	5	0.000223299	2	0.00105589	3	0.000450642	2	0.000575422	4	0.00045154	2	0.000539738	5			4.15405e-05	1	0.000836681	4	0.000105977	2	0.00014271	1	0.000193286	2	0.000591479	3	0.000911702	4	0.000630584	6	0.000442935	5	0	0	0.000240228	3	0.000622232	7	0.000300173	3	0.000382157	5	0
go	GO:0015035	protein-disulfide reductase activity					2.85211e-05	1	8.7473e-05	2			7.30254e-05	1	5.55457e-05	2	3.31492e-05	1			6.53021e-05	1	7.27035e-05	1	0.00022922	3	0.000129835	3									0.000142655	3	6.12274e-05	2	0.000374554	5	2.91251e-05	1			0.000582317	8
go	GO:0015036	disulfide oxidoreductase activity					2.85211e-05	1	8.7473e-05	2			7.30254e-05	1	5.55457e-05	2	3.31492e-05	1			6.53021e-05	1	7.27035e-05	1	0.00022922	3	0.000129835	3									0.000142655	3	6.12274e-05	2	0.000374554	5	2.91251e-05	1			0.000618495	9
go	GO:0015075	monoatomic ion transmembrane transporter activity	0.00941982	17	0.00607232	35	0.00790138	41	0.00939548	36	0.0107436	28	0.00821249	34	0.00967953	17	0.00742412	22	0.00555395	19	0.00890375	25	0.00484367	21	0.00821867	29	0.00349848	19	0.00641373	26	0.030312	31	0.010578	32	0.00719164	29	0.00476997	23	0.00452545	17	0.00639838	24	0.00384555	35	0.0102418	34	0.00817876	24	0.00902798
go	GO:0015078	proton transmembrane transporter activity	0.00937224	16	0.0059381	31	0.00766359	37	0.0091912	33	0.0107436	28	0.00816471	32	0.00967953	17	0.00742412	22	0.0055428	18	0.00748757	17	0.00479728	20	0.00795484	27	0.00346106	18	0.00641373	26	0.0296397	29	0.010376	29	0.00719164	29	0.0041953	21	0.00452545	17	0.00639838	24	0.00339743	27	0.010092	31	0.00788682	19	0.00899339
go	GO:0015081	sodium ion transmembrane transporter activity			0.000134218	4	8.92252e-05	2	0.000221772	3	6.95715e-05	1			0.000635528	3	8.60142e-05	1	5.67725e-05	3	0.000906741	6	0.00044231	4	0.000263822	2	3.74243e-05	1	2.46521e-05	2	0.000672245	2	0.000127956	2			0.000541337	1	5.60501e-05	2	4.50446e-05	1	0.000446537	9	0.00017993	2	0.0002404	4	3.45918e-05
go	GO:0015086	cadmium ion transmembrane transporter activity																			0.000110232	1											0.000167314	2
go	GO:0015144	carbohydrate transmembrane transporter activity	0.00876248	18	0.00226095	23	0.00225023	21	0.00420806	22	0.00973732	22	0.00821944	37	0.010794	27	0.0077573	28	0.00637657	26	0.00461035	13	0.00408329	22	0.00791078	33	0.00119477	12	0.00582636	28	0.00517792	10	0.00824891	19	0.00642226	26	0.00498543	32	0.0037995	19	0.00344105	17	0.00287925	23	0.00864334	25	0.00765561	25	0.005933
go	GO:0015145	monosaccharide transmembrane transporter activity			1.88642e-05	1					5.04922e-05	1	7.47672e-05	1	0.000153443	4	0.000201286	1	6.30867e-05	1	4.37703e-05	1	0	0			9.47041e-05	1							0.000290607	3	6.16399e-05	1	0.000191038	4	4.29268e-05	1					0.000129782	1	4.92293e-05
go	GO:0015149	hexose transmembrane transporter activity			1.88642e-05	1							7.47672e-05	1	0.000129639	3			6.30867e-05	1	4.37703e-05	1					9.47041e-05	1							0.000290607	3			0.000191038	4							0.000129782	1	4.92293e-05
go	GO:0015252	proton channel activity	0.00175239	5	0.000862722	6	0.001423	6	0.00108184	5	0.0012379	5	0.00154483	9	0.0014726	4	0.000647853	3	0.000205308	3	0.00452524	7	0.0016815	7	0.000843158	2	0.00130779	5	0.000739918	4	0.00631208	7	0.00120267	7	0.000819776	3	0.000676757	2	0.00126506	6	0.000905725	5	0.00107373	8	0.00160442	10	0.000914476	5	0.00108393
go	GO:0015267	channel activity	0.00175239	5	0.000862722	6	0.001423	6	0.00112342	6	0.0012379	5	0.0015668	10	0.0014726	4	0.000647853	3	0.000205308	3	0.00537071	12	0.00171592	8	0.000843158	2	0.00130779	5	0.000739918	4	0.00631208	7	0.00136998	9	0.000819776	3	0.000710086	3	0.00126506	6	0.00096028	6	0.00136895	10	0.00160442	10	0.00096601	6	0.00108393
go	GO:0015291	secondary active transmembrane transporter activity	0.00692721	8	0.00145353	13	0.00133321	13	0.00339596	15	0.00927426	19	0.00588234	17	0.0077083	8	0.00473372	13	0.00517416	12	0.00201047	3	0.00131709	6	0.00667918	22	0.000716255	4	0.00459061	13	0.00355002	5	0.00794095	13	0.00592498	19	0.00254557	12	0.00289057	7	0.0029061	11	0.0015109	7	0.00545041	10	0.00658475	11	0.00234313
go	GO:0015293	symporter activity	0.00692721	8	0.00145353	13	0.00133321	13	0.00339596	15	0.00927426	19	0.00588234	17	0.0077083	8	0.00473372	13	0.00517416	12	0.00201047	3	0.00131709	6	0.00667918	22	0.000716255	4	0.00459061	13	0.00355002	5	0.00794095	13	0.00592498	19	0.00254557	12	0.00289057	7	0.0029061	11	0.0015109	7	0.00545041	10	0.00658475	11	0.00234313
go	GO:0015294	solute:monoatomic cation symporter activity	0.00692721	8	0.00145353	13	0.00133321	13	0.00339596	15	0.00927426	19	0.00588234	17	0.0077083	8	0.00473372	13	0.00517416	12	0.00201047	3	0.00131709	6	0.00667918	22	0.000716255	4	0.00459061	13	0.00355002	5	0.00794095	13	0.00592498	19	0.00254557	12	0.00289057	7	0.0029061	11	0.0015109	7	0.00545041	10	0.00658475	11	0.00234313
go	GO:0015295	solute:proton symporter activity	0.00692721	8	0.00145353	13	0.00133321	13	0.00339596	15	0.00927426	19	0.00588234	17	0.0077083	8	0.00473372	13	0.00517416	12	0.00201047	3	0.00131709	6	0.00667918	22	0.000716255	4	0.00459061	13	0.00355002	5	0.00794095	13	0.00592498	19	0.00254557	12	0.00289057	7	0.0029061	11	0.0015109	7	0.00545041	10	0.00658475	11	0.00234313
go	GO:0015318	inorganic molecular entity transmembrane transporter activity	0.00941982	17	0.00607232	35	0.007883	40	0.0093539	35	0.0107436	28	0.00821249	34	0.00967953	17	0.00742412	22	0.00555395	19	0.00846928	23	0.00484367	21	0.00821867	29	0.00349848	19	0.00641373	26	0.030312	31	0.010578	32	0.00719164	29	0.00476997	23	0.00452545	17	0.00639838	24	0.00384555	35	0.0102418	34	0.00812722	23	0.00902798
go	GO:0015399	primary active transmembrane transporter activity	0.00178126	6	0.00113387	12	0.00163375	9	0.00119975	7	0.00131214	7	0.00208255	12	0.00201531	8	0.000906627	6	0.000303746	6	0.00477535	10	0.00292098	15	0.00089428	3	0.00166404	9	0.00078352	6	0.0073371	11	0.0021003	15	0.00125553	5	0.00112166	5	0.00266424	13	0.00101044	7	0.00420049	14	0.00170022	11	0.000792759	3	0.00113557
go	GO:0015407	ABC-type monosaccharide transporter activity									5.04922e-05	1			2.38043e-05	1	0.000201286	1			4.37703e-05	1	0	0			9.47041e-05	1									6.16399e-05	1	0.000100344	2	4.29268e-05	1
go	GO:0015578	mannose transmembrane transporter activity											7.47672e-05	1	0.000129639	3			6.30867e-05	1															0.000290607	3			3.90208e-05	1							0.000129782	1	4.92293e-05
go	GO:0015662	P-type ion transporter activity	0.00175239	5	0.000836136	5	0.00105865	4	0.000998683	3	0.00116833	4	0.00154483	9	0.000940905	2	0.000561839	2	0.000170343	2	0.00460021	7	0.00128558	4	0.000843158	2	0.00124954	4	0.000726017	3	0.00631208	7	0.00122737	7	0.000819776	3	0.000676757	2	0.00120901	4	0.000624258	2	0.000890243	6	0.00125467	6	0.000688235	2	0.00108393
go	GO:0015833	peptide transport			0.000138869	1	0.00022899	2	0.00105589	3	0.000472184	3					0.000245229	2			4.15405e-05	1	0.000476475	3					2.39542e-05	1			0.000836356	2			0.000177836	4			0.000240228	3	0.000687756	6	9.90338e-05	1	0.00023976	1
go	GO:0015925	galactosidase activity					0.00110085	3	0.000155384	2	9.82591e-05	1									0.000258291	1	1.51856e-05	1			7.38028e-05	1	1.45576e-05	1																			0.000221848
go	GO:0015926	glucosidase activity	6.35073e-05	1	8.25346e-05	2	4.54351e-05	1	0.000155815	2	0.000337119	1			0	0			0.000823931	3			0	0	0.000107291	1	5.77215e-05	1					3.45648e-05	1	0	0	3.51371e-05	1	8.28799e-05	2	6.72318e-05	1	3.22038e-05	1	0.000273778	3	0.000306307	1	0
go	GO:0015934	large ribosomal subunit	0.160971	519	0.184206	762	0.18067	740	0.178509	709	0.191631	517	0.186218	783	0.157669	508	0.144694	498	0.243182	833	0.146303	455	0.191675	588	0.173649	530	0.173209	616	0.166421	608	0.149982	294	0.161282	598	0.201695	688	0.202462	793	0.136046	676	0.153227	606	0.186492	956	0.174415	589	0.176667	662	0.187873
go	GO:0015935	small ribosomal subunit	0.227559	585	0.263659	933	0.24947	861	0.23935	788	0.219434	530	0.271653	1018	0.213814	608	0.196976	547	0.281308	804	0.147735	438	0.244456	671	0.240016	664	0.215938	714	0.223008	692	0.134111	234	0.233329	714	0.256027	813	0.279848	984	0.209547	775	0.239932	759	0.219468	1023	0.246252	742	0.26929	892	0.234171
go	GO:0015939	pantothenate metabolic process					6.82419e-05	1																					2.33993e-05	1											4.04245e-06	1			2.9083e-05	1
go	GO:0015940	pantothenate biosynthetic process					6.82419e-05	1																					2.33993e-05	1											4.04245e-06	1			2.9083e-05	1
go	GO:0015980	energy derivation by oxidation of organic compounds	0.000253893	2	2.41146e-05	1	0.000328536	3													0.000987309	7	0.000202404	2							0.00897305	4	0.000137476	2					9.86549e-05	1			0.000480872	7	0.000102013	1			0.000750362
go	GO:0015986	proton motive force-driven ATP synthesis	0.00175239	5	0.00121312	7	0.0013942	8	0.00108184	5	0.00134261	7	0.00181693	13	0.00184853	7	0.00122648	6	0.00102246	7	0.00458055	8	0.00196877	10	0.000843158	2	0.00251643	12	0.00117508	8	0.00651939	8	0.00128433	8	0.000977838	5	0.00073952	5	0.00163825	8	0.0009073	6	0.00107658	10	0.00221167	15	0.000910039	6	0.00320364
go	GO:0016020	membrane	0.00800402	23	0.00189771	24	0.00303723	24	0.00505257	20	0.00902805	24	0.00538007	30	0.00286161	6	0.00544015	18	0.00491755	16	0.0095114	28	0.00478555	23	0.00700575	21	0.0015555	9	0.00439364	18	0.0151927	22	0.0055919	25	0.00528973	23	0.00433754	17	0.00389821	18	0.00353756	15	0.00623238	27	0.00324788	20	0.00729681	19	0.00324009
go	GO:0016043	cellular component organization	0.000485016	6	0.000229528	8	0.000354337	7	0.000564641	7	3.81625e-05	1	0.000510887	7			0.000528231	5	0.00043297	10	0.000402355	4	8.28914e-05	2	0.000103374	3	8.67536e-05	1	2.29876e-05	1	0.000232152	2	0.000250515	7	0.000285299	5	0.000113036	3	0.000426925	6	0.000354834	5	0.000713926	15	0.00062366	7	0.00137813	7	0.00072783
go	GO:0016051	carbohydrate biosynthetic process			0.00017832	3	0.000283416	2	6.49666e-05	1			0.000202242	1	0.00108838	2	0.000120211	2					0.000852107	4	0.000129659	1	0.000511867	4	5.35556e-05	1	0.000211238	1									9.39491e-05	1	5.69702e-05	1	0.000164718	2
go	GO:0016052	carbohydrate catabolic process	0.00160969	5	0.000663282	8	0.00118136	11			0.000388911	4	0.00127679	7	0.00158277	8	0.0035468	11	0.000376983	6	0.000452813	2	0.00172429	8	0.00664217	13	0.000882902	4	9.54006e-05	2	0.000837759	3	0	0	0.000221338	4	0.00013292	4	0.000276656	7	0.00218839	5	0.000246457	6	0.00083926	7	0.000148601	2	8.97674e-05
go	GO:0016053	organic acid biosynthetic process	0.00569682	10	0.0023193	12	0.00261929	14	0.00383179	16	0.00157831	11	0.00442735	16	0.00514119	9	0.00225809	10	0.000415331	5	0.0039175	11	0.00113292	11	0.00519911	7	0.00618181	29	0.000640951	7	0.00339384	15	0.00317358	8	0.00397006	4	0.00451624	17	0.00219393	18	0.000817075	7	0.00530536	27	0.0047862	16	0.000617433	9	0.00181459
go	GO:0016070	RNA metabolic process	0.00378917	30	0.00361705	39	0.00288288	36	0.00286344	22	0.00496735	28	0.00317842	32	0.00349526	27	0.00508444	35	0.00193436	25	0.00377967	17	0.00385332	25	0.00186783	18	0.00482184	36	0.00354805	23	0.00128021	7	0.0039614	31	0.00413808	39	0.00609364	41	0.00304129	35	0.00809812	40	0.00383454	46	0.00572395	34	0.00230667	31	0.00382098
go	GO:0016071	mRNA metabolic process	0.000227188	2	0.000380967	6	4.22567e-05	1	0	0	0.000307095	2	7.43271e-05	2	0.000321611	4	0.00128611	11	0.000190287	7			0.000461269	2	0.000254583	2	0.00068796	6	0.000224585	3	0	0	0.000716553	6	0.00084529	6	0.000119657	2	0.000105075	2	0.000501299	5	0.000178849	2	0.000499014	7	0.000209865	3	7.55045e-05
go	GO:0016072	rRNA metabolic process	9.6449e-05	1	4.41519e-05	1							6.90394e-05	1	9.87784e-05	1																							8.8827e-05	1			2.17942e-05	1	0.0009102	2	2.32106e-05	1
go	GO:0016151	nickel cation binding	0.00111354	3	0.0017923	8	0.00335711	8	0.00326068	6	0.000655704	5	0.00229506	8	0.000600284	4	0.000950752	3	0.00114766	5	0.0054813	7	0.00127142	4	0.000694707	5	0.00225383	6	0.000556814	2	0.000814773	2	0.000583098	3	0.00165171	8	0.000821224	4	0.000884111	3	0.000269967	2	0.000807737	5	0.000655863	6	0.00124246	5	0.0010429
go	GO:0016153	urocanate hydratase activity					0	0													0	0
go	GO:0016209	antioxidant activity	0.000208379	4	0.000443616	6	0	0	5.96179e-05	2	0.000100828	1	0	0	0.00156458	7	0.00062619	5	0.00016805	1	0.000682865	4	0.000759509	2	0.00022922	3	0.00147123	4			0.00156435	4	0.000199799	2	0.000500451	3	0.000227816	3	0.00306749	9	0.00177607	6	2.63695e-05	1	0.000357292	3	7.39719e-05	3	8.81144e-05
go	GO:0016226	iron-sulfur cluster assembly	0.000308642	2	0.000101795	5	0.000109738	3	5.38993e-05	1	3.81625e-05	1	0.000100108	2			9.85022e-05	1			5.02069e-05	1	2.15498e-05	1	6.91079e-05	2	0	0			0.000194669	1	2.06226e-05	1	5.50335e-05	2	2.89157e-05	1	0.000171368	3	0.000242415	4	1.52586e-05	1	0.000264895	3			0.000412116
go	GO:0016301	kinase activity	0.00681398	17	0.0036044	30	0.00341645	32	0.00589752	23	0.00818783	23	0.00418541	22	0.00256285	18	0.0060063	27	0.00387289	22	0.00531031	10	0.00285238	16	0.00810774	24	0.00197392	15	0.00651547	21	0.00717174	17	0.0045796	17	0.00411243	20	0.00272122	20	0.0046678	30	0.0055251	38	0.00234606	22	0.00445573	20	0.00673814	24	0.00363886
go	GO:0016310	phosphorylation	0.000616683	5	0.000641784	2	0.00100703	10	9.35984e-05	1	0.000135808	1	0.000797232	5	0.00147048	14	0.000422226	3	0.000126402	3	0.000190424	1	0.000965741	10	9.84828e-05	1	0.00285656	10	0.00411716	7	0.00124026	4	0.00332742	9	6.70423e-05	1			0.00264758	10	0.000647694	6	0.000762875	10	0.00263744	9	0.000764308	6	0.000142656
go	GO:0016407	acetyltransferase activity	0.00113195	5	0.00320202	11	0.00284181	15	0.00123256	6	0.000961247	6	0.00157776	6	0.00186117	10	0.00140587	6	0.000259895	3	0.00157726	6	0.000526573	3	0.000833327	8	0.00298653	7	0.00295975	7	0.00246605	6	0.00255237	7	0.000534399	4	0.000950718	9	0.00286979	12	0.00105036	7	0.00569295	17	0.0052867	9	0.00291482	8	0.00235904
go	GO:0016408	C-acyltransferase activity	0.00113195	5	0.00320202	11	0.00271072	14	0.00102713	4	0.000117375	2	0.00138722	5	0.00185107	9	0.00134992	5	0.000259895	3	0.00153339	5	0.000526573	3	0.000570387	6	0.00297529	6	0.00310077	9	0.00267498	7	0.00255237	7	0.000534399	4	0.000950718	9	0.00286979	12	0.00131544	7	0.00560554	15	0.0052867	9	0.00291482	8	0.00235904
go	GO:0016410	N-acyltransferase activity							6.58502e-05	1			0.000190542	1	1.01021e-05	1					0.00048491	2					2.42772e-05	2
go	GO:0016421	CoA carboxylase activity	0.000333837	1			0.000517537	2													0	0					3.39214e-05	1							0	0					0	0
go	GO:0016453	C-acetyltransferase activity	0.00113195	5	0.00320202	11	0.00271072	14	0.00102713	4	0.000117375	2	0.00138722	5	0.00185107	9	0.00134992	5	0.000259895	3	0.00153339	5	0.000526573	3	0.000543165	5	0.00297529	6	0.00295975	7	0.00246605	6	0.00255237	7	0.000534399	4	0.000950718	9	0.00286979	12	0.000988707	6	0.00560554	15	0.0052867	9	0.00291482	8	0.00235904
go	GO:0016462	pyrophosphatase activity	0.000961858	2	0.000573808	6	0.00149205	10	0.0012238	7	0.000785143	5	0.000519344	8	0.000773029	4	0.00224728	14	0.000425895	6	0.00148075	6	0.00158616	12	0.00225533	11	0.000788697	8	0.000267901	4	0.000722613	2	0.000306811	2	0.000221147	3	0.00143965	8	0.000974047	10	0.00114414	9	0.00351967	12	0.000829763	5	0.000346446	2	0.00506089
go	GO:0016463	P-type zinc transporter activity																			0.000110232	1											0.000167314	2
go	GO:0016469	proton-transporting two-sector ATPase complex	0.00175239	5	0.000836136	5	0.00125769	6	0.000998683	3	0.00116833	4	0.00154483	9	0.000940905	2	0.000561839	2	0.000170343	2	0.00448998	6	0.00128558	4	0.000843158	2	0.00124954	4	0.000726017	3	0.00631208	7	0.00110931	6	0.000819776	3	0.000676757	2	0.00120901	4	0.000624258	2	0.000874757	6	0.00125467	6	0.000716411	3	0.00108393
go	GO:0016491	oxidoreductase activity	0.00895965	56	0.0202829	111	0.0242189	97	0.0142959	69	0.0184483	49	0.0122583	52	0.0279669	88	0.0233773	75	0.00636954	50	0.0206744	76	0.0317735	82	0.010483	52	0.0176568	85	0.0143989	54	0.0333662	59	0.0112145	68	0.0165633	39	0.00988661	71	0.0194339	103	0.0202612	87	0.0105185	75	0.0281654	99	0.00538626	53	0.0141699
go	GO:0016530	metallochaperone activity	0.00046662	8	0.000366862	10	0.000100833	3	0.00112869	14	0.000831734	15	0.000350313	7	0.00107752	14	0.000760539	12	0.000354113	8	0.000515157	6	0.000251368	5	0.000497227	9	0.000537373	8	0.000311538	9	0.000284639	4	0.00108846	19	0.000274956	7	0.00046225	12	0.00101852	20	0.000253863	6	0.000635948	14	0.000628872	8	0.000517622	12	0.000951585
go	GO:0016531	copper chaperone activity	0.00046662	8	0.000366862	10	0.000100833	3	0.00112869	14	0.000831734	15	0.000350313	7	0.00107752	14	0.000760539	12	0.000354113	8	0.000515157	6	0.000251368	5	0.000497227	9	0.000537373	8	0.000311538	9	0.000284639	4	0.00108846	19	0.000274956	7	0.00046225	12	0.00101852	20	0.000253863	6	0.000635948	14	0.000628872	8	0.000517622	12	0.000951585
go	GO:0016614	oxidoreductase activity, acting on CH-OH group of donors	0.00228652	20	0.00703036	31	0.00617167	23	0.0024855	7	0.00940184	26	0.00172819	11	0.00976464	25	0.00985189	22	0.000632282	11	0.00265742	11	0.00143524	18	0.00410488	15	0.00417844	25	0.00692239	15	0.00776019	22	0.00107398	14	0.00286814	4	0.00131288	15	0.00387672	18	0.00402696	14	0.00383415	17	0.0068062	29	0.00228697	16	0.00581338
go	GO:0016616	oxidoreductase activity, acting on the CH-OH group of donors, NAD or NADP as acceptor	0.00228652	20	0.00703036	31	0.00617167	23	0.0024855	7	0.00940184	26	0.00172819	11	0.00976464	25	0.00985189	22	0.000632282	11	0.00265742	11	0.00143524	18	0.00410488	15	0.00417844	25	0.00692239	15	0.00776019	22	0.00107398	14	0.00286814	4	0.00131288	15	0.00387672	18	0.00402696	14	0.00383415	17	0.00643067	27	0.00228697	16	0.00483438
go	GO:0016620	oxidoreductase activity, acting on the aldehyde or oxo group of donors, NAD or NADP as acceptor	0.00160947	6	0.00146699	7	0.00156111	9	0.00167406	11	0.000736631	4	0.00172217	6	0.00092265	6	0.0011693	7	0.00175737	9	0.00104226	4	0.00129378	5	0.00133031	7	0.00253184	4	0.00142711	10	0.00114471	2	0.00132694	9	0.000153105	2	0.00298776	5	0.00195602	7	0.00148942	7	0.00172314	10	0.00601356	12	0.000282821	1	0.0020116
go	GO:0016625	oxidoreductase activity, acting on the aldehyde or oxo group of donors, iron-sulfur protein as acceptor	0.000474615	5	0.00215676	18	0.00468999	24	0.0034896	20	0.00638412	8	0.0072827	19	0.0079567	15	0.00538312	11	0.00248807	14	0.00379774	16	0.00659395	17	0.00300127	7	0.00396365	15	0.0030419	9	0.00853239	10	0.0021233	14	0.00601043	10	0.00185021	15	0.00220112	18	0.00526878	18	0.00321767	22	0.00268855	9	0.000780097	12	0.00124193
go	GO:0016627	oxidoreductase activity, acting on the CH-CH group of donors	0.000442571	3	0.00476333	10	0.00586781	18	0.00161343	6	0.000807603	1	3.42451e-05	2	0.00514242	9	0.00429896	8			0.00812383	17	0.0113035	11	6.74672e-05	2	9.82203e-05	1			0.00684541	4	0.000211167	2	0	0	6.3717e-05	2	0.00147732	13	0.00379485	13	9.49567e-05	1	0.00498081	10	9.74284e-05	1	0.00111882
go	GO:0016635	oxidoreductase activity, acting on the CH-CH group of donors, quinone or related compound as acceptor	1.40882e-05	1					0.000807677	1																																	9.49567e-05	1			9.74284e-05	1
go	GO:0016638	oxidoreductase activity, acting on the CH-NH2 group of donors	0.000184387	2	0.00213046	24	0.00518688	16	0.00421734	14	0.000760687	7	0.000448496	7	0.000989172	10	0.00157232	14	0.000395258	7	0.00105655	5	0.00971065	22	0.000292828	6	0.00324475	18	0.000968715	8	0.00306406	5	0.00469836	14	0.000228016	5	0.00250832	18	0.0060111	26	0.00213214	15	0.000835896	12	0.00346279	15	5.9729e-05	2	0.000937034
go	GO:0016639	oxidoreductase activity, acting on the CH-NH2 group of donors, NAD or NADP as acceptor	0.000127426	1	0.00152819	17	0.00499669	13	0.00383475	12	0.000702356	6	0.000296994	5	0.000799025	8	0.00147889	13	0.000154758	3	0.00105655	5	0.0094617	20	0.000222879	4	0.00319835	17	0.000911375	7	0.00289908	4	0.00436309	11	0.000157885	4	0.00236669	16	0.00549284	22	0.00198121	13	0.000717533	10	0.00342296	14	1.46946e-05	1	0.000705069
go	GO:0016645	oxidoreductase activity, acting on the CH-NH group of donors	0.000266677	2	5.42606e-05	1	5.38209e-05	1									8.06517e-05	1	0.000322165	3					8.8861e-05	2	7.24005e-05	2	2.12201e-05	1	8.29555e-05	1	6.41092e-05	1	0	0	0.000135276	2	0.000199501	3	0.000142085	1	6.0697e-05	2	0.000437371	3	0.000194058	2	0.000750362
go	GO:0016646	oxidoreductase activity, acting on the CH-NH group of donors, NAD or NADP as acceptor	0.000266677	2	5.42606e-05	1	5.38209e-05	1									8.06517e-05	1	0.000322165	3					8.8861e-05	2	7.24005e-05	2	2.12201e-05	1	8.29555e-05	1	6.41092e-05	1	0	0	0.000135276	2	0.000199501	3	0.000142085	1	3.22272e-05	1	0.000239796	1	0.000194058	2
go	GO:0016651	oxidoreductase activity, acting on NAD(P)H					0.000132095	1			2.37468e-05	1	4.0148e-05	1	2.50912e-05	1			5.17646e-05	1									3.2851e-05	1			1.93107e-05	1	0.000105691	1			0.000170548	2
go	GO:0016667	oxidoreductase activity, acting on a sulfur group of donors					2.85211e-05	1	8.7473e-05	2			7.30254e-05	1	0.000137349	3	3.31492e-05	1			0.000142161	3	7.27035e-05	1	0.000265148	4	0.000129835	3					0.000984565	6	0.00100612	1	0.000142655	3	9.01146e-05	3	0.000374554	5	0.000299641	3			0.000618495	9
go	GO:0016668	oxidoreductase activity, acting on a sulfur group of donors, NAD(P) as acceptor													0.000106346	2	3.31492e-05	1			5.23774e-05	1			0.00022922	3															0.00023927	3	6.60694e-05	1			6.35686e-05	2
go	GO:0016684	oxidoreductase activity, acting on peroxide as acceptor			0.000170473	2			5.96179e-05	2							0	0	0.00016805	1	0.000331065	1											8.97051e-05	1	0.000455212	1			0.000557341	4	2.65272e-05	1			0.000215221	2			8.81144e-05
go	GO:0016721	oxidoreductase activity, acting on superoxide radicals as acceptor	0.000208379	4	0.000273143	4	0	0			0.000100828	1	0	0	0.00154004	6	0.00059304	4			0.000351801	3	0.000759509	2			0.00147123	4			0.00156435	4	0.000110094	1	4.52389e-05	2	0.000227816	3	0.00251015	5	0.00151027	2	2.63695e-05	1	0.000142071	1	1.04033e-05	1
go	GO:0016740	transferase activity	0.0141412	66	0.0133486	121	0.0149079	129	0.0143246	87	0.0177776	79	0.0153227	103	0.0179474	108	0.019617	107	0.00996309	77	0.0187478	72	0.0125171	79	0.0157408	83	0.0158487	97	0.0188309	97	0.0270465	64	0.0146714	85	0.0095942	75	0.0145464	124	0.0152707	120	0.0191517	134	0.0162215	142	0.0206333	94	0.0161358	110	0.0166579
go	GO:0016741	transferase activity, transferring one-carbon groups	0	0	0.00024865	4	0.000171405	3	0.000396241	5	0.000914077	3	0.00098675	7			3.48389e-05	1	0.000338469	4	0.00144056	9	0.000624716	6	0.000479277	2	0.000565337	8	0.000282383	6	0.00104908	9	3.44816e-05	1	7.06529e-05	2	0.000426631	5	9.00204e-05	2	0.000944513	10	0.00108374	11	0.000437668	5	0.00142612	12	0.000415956
go	GO:0016742	hydroxymethyl-, formyl- and related transferase activity			0.000192448	2	0	0	0.000357178	4			0.00026918	2					1.63046e-05	1	0.000569082	4	0.000270508	2	0.000409399	1	0.000382348	4	6.10366e-05	2	0.000660851	5			7.06529e-05	2	9.5269e-05	2	0	0	0.000707823	6	0.000151826	2	0.000184303	3	0.000185072	2	0.000252828
go	GO:0016743	carboxyl- or carbamoyltransferase activity			1.205e-05	1	0.000115943	2	3.90636e-05	1	0.000914077	3	0.000698001	4			3.48389e-05	1					0.000354208	4			6.2518e-05	1	0.000221346	4	0.000115947	2	3.44816e-05	1	0	0	0.000176687	1			0.00023669	4	0.000426146	2	0.000139859	1	0.00105533	8	0.000107009
go	GO:0016744	transketolase or transaldolase activity			3.35647e-05	1			1.96905e-05	1							0.000492295	5	1.47307e-05	1	8.46556e-05	1							3.80449e-05	1	0	0	2.04667e-05	1							2.05605e-05	1							0.000243603
go	GO:0016746	acyltransferase activity	0.001237	7	0.00408866	18	0.00285229	16	0.00194428	11	0.00164781	11	0.00157776	6	0.00460218	17	0.00278346	10	0.000721532	8	0.00229081	9	0.00069089	4	0.0022187	15	0.00316703	13	0.00326708	13	0.00298992	10	0.00313191	12	0.000559524	5	0.00157216	17	0.00486461	24	0.00175799	12	0.00656646	25	0.00672892	15	0.0029284	9	0.00288078
go	GO:0016747	acyltransferase activity, transferring groups other than amino-acyl groups	0.001237	7	0.00407098	17	0.00285229	16	0.0016991	9	0.00164781	11	0.00157776	6	0.00460218	17	0.00278346	10	0.000679508	7	0.00229081	9	0.00069089	4	0.0022187	15	0.00306851	10	0.00323572	12	0.00277212	8	0.00313191	12	0.000559524	5	0.00148271	15	0.00482421	22	0.00175799	12	0.00640481	22	0.00670942	14	0.0029284	9	0.00265253
go	GO:0016757	glycosyltransferase activity	0.000687398	4	0.000121531	4	0.000208775	5	4.11443e-05	1	5.64426e-05	2	0.000310332	1	0.00119379	5	0.00148738	7	0.000233436	5	0.00132874	2	0.000293892	2	0.000209289	3	0.000833486	5	0.000510382	7	0.000331544	2	0.000454415	6	3.43597e-05	1	0.000431168	7	0.00030447	6	0.000211434	3	0.0001077	4	0.000216076	3	0.000545901	7	0.000464571
go	GO:0016758	hexosyltransferase activity	0.000430196	2	8.62002e-05	3	6.283e-05	2			2.85885e-05	1	0.000310332	1	0.000470486	1	0.00124851	4	0.000123066	2	0.00132874	2			7.2903e-05	1			0.000284697	3			0.000281037	4	0	0	2.74007e-05	1	4.05841e-05	1					0.000171056	2	0.000369043	3	0.000214708
go	GO:0016763	pentosyltransferase activity	0.000257202	2	3.5331e-05	1	0.000145945	3	4.11443e-05	1	2.78541e-05	1			0.000723308	4	0.00023887	3	0.00011037	3			0.000293892	2	0.000136386	2	0.000833486	5	0.000225684	4	0.000331544	2	0.000173378	2	3.43597e-05	1	0.000403768	6	0.000263886	5	0.000211434	3	0.0001077	4	4.50203e-05	1	0.000176858	4	0.000249863
go	GO:0016765	transferase activity, transferring alkyl or aryl (other than methyl) groups	0.000124623	2	0.000498133	4	0.000409727	2	0.000209541	4	0.000445876	3			0.000304904	5	0.000412763	2	3.66437e-05	1			0.000284573	2	3.02244e-05	1	0.000657056	4	4.43782e-05	1	0.000371684	2	0.000161705	1	0.000225676	2	0.000604347	6	0.000397297	4	0.000534008	7	0.000105831	3	0.000127546	1	0.000427989	6	0.000781513
go	GO:0016769	transferase activity, transferring nitrogenous groups	6.8372e-05	2	0.000582712	9	0.00119201	8	0.000634195	4	0.000391438	3	0.000785677	4	0.000312955	4	0.000228625	4	0.000137701	2	0.00169913	10	0.00112002	3	3.94905e-05	2	0.000970464	5	9.68637e-05	1	0.000243891	1	9.51033e-05	3	8.70124e-05	2	0.000277116	6	0.000784936	9	0.00108173	9	0.000405664	6	0.000310302	3	0.000451965	5	0.000354814
go	GO:0016772	transferase activity, transferring phosphorus-containing groups	0.0113177	48	0.00748522	75	0.00949183	93	0.0109343	59	0.0142267	55	0.0114778	83	0.0109664	73	0.0141359	76	0.00836036	55	0.0117812	40	0.00946492	61	0.0127638	60	0.00928353	57	0.0144573	66	0.0135373	38	0.010578	57	0.00799115	61	0.011235	83	0.00880513	74	0.0143133	88	0.00770056	88	0.0127334	65	0.0101068	67	0.0112593
go	GO:0016773	phosphotransferase activity, alcohol group as acceptor	0.00589379	15	0.00278573	30	0.0021256	20	0.0063615	26	0.00786021	20	0.00633881	38	0.00475912	25	0.00833886	34	0.00623464	32	0.00819604	20	0.00358981	21	0.00663989	28	0.0010815	10	0.00613264	34	0.00609565	12	0.00450061	26	0.00439088	22	0.00410188	31	0.00307164	23	0.00434444	27	0.00260373	26	0.00520972	27	0.00679004	25	0.00645521
go	GO:0016774	phosphotransferase activity, carboxyl group as acceptor	0.00176256	6	9.20819e-05	2	0.00136697	12	0.000306229	2	0.000464421	4	0.00117572	8	0.000697971	9	0.000357588	4	0.000712675	6	0.000396769	3	0.0010219	5	0.00279019	8	0.00106605	10	0.000609912	4	0.00157188	6	0.000673194	3	8.68026e-05	2	0.000482613	4	0.00212362	10	0.00108515	12	0.000397156	4	0.00271842	8	0.000496057	8	0.000189321
go	GO:0016775	phosphotransferase activity, nitrogenous group as acceptor			3.03673e-05	1	0.000241155	3			0.000278416	1	7.50522e-05	1									0.00039819	4			8.14446e-05	1			0.000293796	1	4.53535e-05	1	0	0	6.00922e-05	1			2.74439e-05	1	9.06449e-06	1	6.96287e-05	1			8.93235e-05
go	GO:0016776	phosphotransferase activity, phosphate group as acceptor	9.72911e-05	1	0.000332633	3	0.000125933	2	0.000166316	2	0.000544713	2	3.05085e-05	1	4.26345e-05	2	0.00024424	4											0.00014417	1	0.00107945	3	2.18595e-05	1	4.09673e-05	1	6.75097e-05	1	0.00010501	5	0.000217574	5			2.9083e-05	1	0.000108575	2
go	GO:0016778	diphosphotransferase activity							0.000136773	3																					0.000245916	2					3.83001e-05	1	1.36619e-05	1			0.000153879	3					0.000561368
go	GO:0016779	nucleotidyltransferase activity	0.003206	23	0.0032257	33	0.00393274	44	0.00393667	25	0.00501302	27	0.00327508	31	0.00343845	24	0.00453248	30	0.00133444	16	0.00271375	15	0.004224	29	0.00192498	18	0.00483189	31	0.00338431	20	0.00225998	10	0.00274877	22	0.00331439	33	0.00597537	41	0.00271149	31	0.00740612	36	0.0037728	44	0.00442548	24	0.00229776	29	0.0032823
go	GO:0016782	transferase activity, transferring sulphur-containing groups	0.000104009	2	0.000262184	5	0.000581882	2	0.000145244	2	9.5274e-05	2	0.000203941	3	0.000567218	4	4.17012e-05	2	0.000120227	1	0.0001227	1	3.81125e-05	1			0.000181726	2	0.000134528	2	0.00852311	2	0.00019529	4	0.000625829	2			2.42025e-05	1	0.000288204	4	0.000251543	5	7.93002e-05	2	0.000248679	4	0.000257349
go	GO:0016787	hydrolase activity	0.00239119	11	0.00354167	32	0.00641135	28	0.00680335	35	0.00189426	12	0.00334149	22	0.00349823	19	0.00626408	32	0.00293531	33	0.0112988	38	0.00414348	28	0.00547856	28	0.00390063	22	0.00121934	16	0.0136093	17	0.00154763	18	0.00266544	18	0.00277662	24	0.00357915	29	0.00283286	26	0.00687334	42	0.00196695	18	0.00256636	15	0.00813337
go	GO:0016788	hydrolase activity, acting on ester bonds	3.31567e-05	1	0.000575493	7	0.000149602	2	0.000397777	6			0.000390978	3	0.00175042	5	8.57969e-05	3	0.00012422	5	0.000766506	3					0.0004821	3	0.00010541	2	0.00501651	2	0.000207843	5			4.5597e-05	2	0	0	0.00016252	3	0.000637611	11	9.41785e-06	1	7.04199e-05	1	0.000485311
go	GO:0016791	phosphatase activity			6.86458e-05	1	4.25602e-05	1	0.000239389	3			0.000376926	2	0.00166365	3	6.42577e-05	2			0.000188185	1					0.000133364	1	3.75665e-05	1	0.00100645	1							0	0					9.41785e-06	1	7.04199e-05	1
go	GO:0016798	hydrolase activity, acting on glycosyl bonds	0.000117846	2	9.03885e-05	3	0.00126074	5	0.00123034	7	0.000435378	2	0	0	2.46416e-05	1	0.000150089	1	0.000931284	7	0.000660582	4	0.000110848	2	0.00184008	7	0.000255617	3	9.20955e-05	3	0.000700346	2	3.45648e-05	1	0.000466906	4	0.000179492	3	0.000698567	6	0.000336031	2	0.00152455	8	0.000332867	4	0.000368301	3	0.000221848
go	GO:0016810	hydrolase activity, acting on carbon-nitrogen (but not peptide) bonds	0.00127833	6	0.00230198	16	0.00350896	11	0.00368996	12	0.000631957	4	0.00229506	8	0.00062525	5	0.00324106	9	0.00128867	11	0.00705972	17	0.00163551	9	0.000851552	7	0.00250758	9	0.000613703	4	0.00628371	8	0.000941084	8	0.00165171	8	0.000987773	9	0.0015183	10	0.000772021	6	0.00116465	9	0.000649603	6	0.00168235	8	0.00131997
go	GO:0016811	hydrolase activity, acting on carbon-nitrogen (but not peptide) bonds, in linear amides	0.00111354	3	0.00204486	13	0.00344745	10	0.00337704	10	0.000631957	4	0.00229506	8	0.000602569	4	0.000950752	3	0.00123154	8	0.00665578	14	0.00148744	6	0.000819414	6	0.00232022	7	0.000556814	2	0.00578516	4	0.000749753	6	0.00165171	8	0.000845817	6	0.00114398	6	0.000296464	3	0.000844951	6	0.000540757	4	0.00124246	5	0.0010429
go	GO:0016812	hydrolase activity, acting on carbon-nitrogen (but not peptide) bonds, in cyclic amides	5.37317e-05	1					0.000255631	1					2.2681e-05	1	0.000224546	2	1.29274e-05	1					3.21387e-05	1			1.9252e-05	1	0.000107001	1	0.000163943	1							6.18991e-05	1	2.26293e-05	1					8.46585e-05
go	GO:0016814	hydrolase activity, acting on carbon-nitrogen (but not peptide) bonds, in cyclic amidines	0.000111053	2	2.33394e-05	1			5.72897e-05	1							0.00199872	3	4.42057e-05	2	0.000403938	3	0.000148074	3			0.000187355	2	3.76373e-05	1	0.000391546	3	2.73887e-05	1	0	0	9.34447e-05	2	0.000323333	3	0.000413658	2	0.000297067	2	0.000108847	2	0.000185072	2	4.50622e-05
go	GO:0016817	hydrolase activity, acting on acid anhydrides	0.000961858	2	0.000573808	6	0.00149205	10	0.0012238	7	0.000785143	5	0.000519344	8	0.000773029	4	0.00224728	14	0.000425895	6	0.00155241	7	0.00158616	12	0.00225533	11	0.000788697	8	0.000267901	4	0.000722613	2	0.000306811	2	0.000221147	3	0.00143965	8	0.000974047	10	0.00114414	9	0.00351967	12	0.000829763	5	0.000346446	2	0.00506089
go	GO:0016818	hydrolase activity, acting on acid anhydrides, in phosphorus-containing anhydrides	0.000961858	2	0.000573808	6	0.00149205	10	0.0012238	7	0.000785143	5	0.000519344	8	0.000773029	4	0.00224728	14	0.000425895	6	0.00155241	7	0.00158616	12	0.00225533	11	0.000788697	8	0.000267901	4	0.000722613	2	0.000306811	2	0.000221147	3	0.00143965	8	0.000974047	10	0.00114414	9	0.00351967	12	0.000829763	5	0.000346446	2	0.00506089
go	GO:0016822	hydrolase activity, acting on acid carbon-carbon bonds
go	GO:0016823	hydrolase activity, acting on acid carbon-carbon bonds, in ketonic substances
go	GO:0016829	lyase activity	0.00293495	21	0.00319387	37	0.00642502	42	0.00182449	21	0.00214967	19	0.00165002	12	0.00646721	36	0.0124629	42	0.00109403	12	0.00807901	26	0.00835324	36	0.00595345	22	0.00611782	42	0.00246023	26	0.0180035	25	0.00380634	29	0.000765381	6	0.00290716	24	0.0090679	67	0.0101114	47	0.00175701	36	0.0186183	42	0.00390082	28	0.00281665
go	GO:0016830	carbon-carbon lyase activity	0.0012937	9	0.00167445	16	0.00280264	19	0.000398402	7	0.00125878	9	0.000390696	3	0.00355435	16	0.00798304	20	0.000943782	7	0.00347605	5	0.00570516	23	0.00488401	11	0.00319502	24	0.000879383	10	0.003767	8	0.000946623	13	0.000658552	4	0.00101119	8	0.00512969	26	0.00375535	23	0.000816285	17	0.0122114	22	0.001453	12	0.00104684
go	GO:0016831	carboxy-lyase activity	0.000458413	4	0.000318691	6	0.00125118	6	9.72055e-05	2					0.00108838	2	0.00420256	9	0.000146909	4	0.00321203	2	0.00127318	9	0.00108106	5	0.00125622	12	0.000271422	3	0.00263584	4	0.000595673	8	0	0	0.000834403	4	0.00167483	12	0.000861595	14	0.0002881	7	0.00538111	9	0.000291691	5	0.000626298
go	GO:0016832	aldehyde-lyase activity	0.000835285	5	0.00135576	10	0.00155145	13	0.000259619	4	0.00125878	9	0.000390696	3	0.00246597	14	0.00353111	10	0.000796873	3	0.000264018	3	0.00155728	9	0.00380296	6	0.00193879	12	0.000522032	4	0.00113117	4	0.00035095	5	0.00061268	3	0.000153443	3	0.00345486	14	0.00255292	8	0.000473269	8	0.00336079	10	0.00116131	7	0.000369624
go	GO:0016833	oxo-acid-lyase activity							4.15773e-05	1													0.000139451	2					8.59288e-05	3					4.58721e-05	1	2.33404e-05	1					5.49159e-05	2					5.09131e-05
go	GO:0016835	carbon-oxygen lyase activity	0.000796504	7	0.000702158	15	0.00266428	14	0.000823081	10	0.000573988	5	0.0010423	6	0.00157045	13	0.00414478	18	0.000150244	5	0.00241714	12	0.00264808	13	0.000905964	8	0.00175512	5	0.000834965	10	0.00218515	7	0.0022252	9	3.92564e-05	1	0.000565578	8	0.00249795	28	0.0062146	22	0.000817366	15	0.00614739	14	0.000853621	9	0.000978661
go	GO:0016836	hydro-lyase activity	0.000796504	7	0.000702158	15	0.00266428	14	0.000823081	10	0.000573988	5	0.000237955	4	0.00116491	8	0.00313444	14	0.000102353	4	0.00173366	10	0.00264808	13	0.000905964	8	0.000235592	3	0.000741165	9	0.00142713	6	0.0022252	9	3.92564e-05	1	0.000565578	8	0.00249795	28	0.00620803	21	0.000817366	15	0.00552761	10	0.000853621	9	0.000978661
go	GO:0016840	carbon-nitrogen lyase activity			2.34769e-05	1	0.000358235	4	0.000116411	1	0.000232059	4	0.000131633	1	7.8135e-05	1	0.000103299	1			0.000305306	2			1.56835e-05	1	3.59968e-05	1	0.000122882	2	0.00364028	2	0.000116329	2			2.85448e-05	2	0.000107905	1					0.000155118	4	0.00127513	4	0.000500805
go	GO:0016841	ammonia-lyase activity					0.000132832	2	0.000116411	1	0.000232059	4	0.000131633	1	7.8135e-05	1	0.000103299	1											0.000122882	2	0.000217181	1	0.000116329	2			1.16575e-05	1	0.000107905	1					5.43936e-05	1	0.000767505	3	6.53675e-05
go	GO:0016846	carbon-sulfur lyase activity	9.70395e-05	2	0.000737412	4	0.000567678	4	5.41102e-05	1					0.00018612	1			0	0	0.00188052	7			0.000147785	2	0.000526317	5	0.000622996	4	0.00116251	3	0.000280478	3	6.75719e-05	1	0.00130185	6	0.000765175	5			4.55458e-05	2			5.55561e-05	1	0.000232491
go	GO:0016852	sirohydrochlorin cobaltochelatase activity	0.000747713	3	5.63778e-05	1	3.21831e-05	1	0.000388664	1	8.4846e-05	1	8.53955e-05	2	0.00107816	5	0.000231816	3					0	0	0	0	0.000415293	4	0	0	0.0072486	5	0.000237714	2	0	0			0.000436946	3	0.000141432	2	7.7817e-05	2	0.000104473	2	0.000263509	2	5.78553e-05
go	GO:0016853	isomerase activity	0.000706941	9	0.00443832	20	0.00283077	26	0.0038778	16	0.000587173	9	0.000642144	9	0.0013684	12	0.00409942	19	0.000374014	9	0.00297367	8	0.00425147	13	0.0010863	10	0.000740063	10	0.00107854	16	0.00433988	17	0.00222674	26	0.000942515	9	0.00131443	17	0.00127262	14	0.00177575	18	0.00329553	23	0.00142462	14	0.00124871	13	0.00460436
go	GO:0016860	intramolecular oxidoreductase activity	0.000292932	3	0.00415006	11	0.0023259	16	0.00134602	6	0.000314152	4	1.76233e-05	1	0.000907364	6	0.00187494	9	2.54134e-05	1	0.00196422	4	0.00343564	7	0.000427834	4	0.000510314	5	0.000742582	8	0.00391002	12	0.000879901	14	0.000253611	3	0.000816967	13	0.000618083	4	0.000973806	9	0.00250626	12	0.000958682	9	0.00072557	5	0.000917305
go	GO:0016861	intramolecular oxidoreductase activity, interconverting aldoses and ketoses	0.000292932	3	0.00415006	11	0.00174046	11	0.00111437	5	0.000314152	4	1.76233e-05	1	0.000907364	6	0.00127079	6	2.54134e-05	1	0.00196422	4	0.00343564	7	0.000376779	3	0.000510314	5	0.000742582	8	0.00325261	8	0.000879901	14	0.000253611	3	0.000767243	12	0.000618083	4	0.000973806	9	0.00245232	11	0.000958682	9	0.000572323	4	0.000298324
go	GO:0016866	intramolecular transferase activity	0.000147323	2	9.70254e-05	5	0.000321762	7	0.000745958	2	3.44919e-05	1	1.73286e-05	1			0.000294861	2	0.000265053	5	0.000237955	2	0.000405263	3	0.000375223	3	5.20239e-05	2	0.000117905	4	0.00032336	3	0.000190622	4	0.000140131	1	0.000365378	2	0.000423972	5	0.000596383	5	0.000201818	4	0.000271482	3	0.0001114	2	0.00328863
go	GO:0016868	intramolecular phosphotransferase activity			5.19417e-05	2	0.000153039	4	0.000745958	2							0.000294861	2			9.68028e-05	1	0.000309749	2	0.000285524	2	1.94727e-05	1	3.9022e-05	1	0.000187957	2	1.71224e-05	1					0.000185064	3	3.40753e-05	1			0.000271482	3	0.0001114	2	0.00328863
go	GO:0016874	ligase activity	0.00605305	35	0.00380175	49	0.00616157	60	0.00293118	19	0.00278464	14	0.0027353	29	0.00381096	22	0.00518122	38	0.0012336	17	0.00901897	21	0.00364789	30	0.00211337	19	0.00338739	31	0.00237086	28	0.0105457	19	0.00367765	28	0.00122932	10	0.00288851	35	0.00495882	32	0.00503843	45	0.00335083	52	0.0162538	44	0.00174279	22	0.00607919
go	GO:0016875	ligase activity, forming carbon-oxygen bonds	0.00134086	6	0.000218518	5	0.000738501	13	0.000836095	4	4.56468e-05	2	7.85607e-05	2	0.000970332	4	0.00161879	16	0.000103297	3	0.000220623	1	0.000577399	8	0.000125748	4	0.000424268	5	0.000511537	7	0.000164897	1	0.00060181	7	7.17834e-05	2	0.000389907	7	0.000469907	8	0.00196992	9	0.000243974	7	0.000724212	7	1.51132e-05	1	0.0034569
go	GO:0016877	ligase activity, forming carbon-sulfur bonds	0.0001388	2	7.254e-05	1	0.000139828	2			0.000213293	1	1.48813e-05	1	7.83675e-05	1	7.84332e-05	1	0	0			0.000661525	4	0.000156852	1			5.52144e-05	1			0.00110744	1	8.68628e-05	1	5.09577e-05	1	9.02145e-05	1			6.89152e-05	2			7.2324e-05	1	0.00011631
go	GO:0016878	acid-thiol ligase activity	0.0001388	2	7.254e-05	1	0.000139828	2			0.000213293	1	1.48813e-05	1	7.83675e-05	1	7.84332e-05	1	0	0			0.000661525	4	0.000156852	1			5.52144e-05	1			0.00110744	1	8.68628e-05	1	5.09577e-05	1	9.02145e-05	1			6.89152e-05	2			7.2324e-05	1	0.00011631
go	GO:0016879	ligase activity, forming carbon-nitrogen bonds	0.00280337	21	0.00252176	34	0.00331534	36	0.00101324	10	0.00128779	6	0.00109703	17	0.00128966	13	0.00283615	18	0.00091384	10	0.00427311	13	0.000681076	10	0.00072379	10	0.00139391	16	0.00106419	16	0.00363519	10	0.000743739	12	0.000250897	4	0.00122955	24	0.00313363	17	0.00216279	31	0.00195086	34	0.0138904	26	0.000500475	11	0.00138745
go	GO:0016881	acid-amino acid ligase activity	0.00107931	5	0.000372174	6	0.00116635	6			8.58251e-05	1	6.25287e-05	1	2.23359e-05	1	0.00208517	9	0.000165313	2	0.000858749	4	8.26292e-05	2	3.5822e-05	1	0.000147557	1			0.00155568	3			0	0	1.49834e-05	1	0.000240957	2	0.00031554	7	0.000289332	6	0.000312082	4	5.62e-05	1	8.63799e-05
go	GO:0016882	cyclo-ligase activity			0.000437924	5	0.000206649	3															2.06982e-05	1			0.000194994	2			0	0			1.7044e-05	1	7.37663e-06	1	1.33467e-05	1			0.000198861	3	5.69427e-05	1	0	0	9.46994e-06
go	GO:0016884	carbon-nitrogen ligase activity, with glutamine as amido-N-donor	0.000993833	11	0.000765483	17	0.00117379	16	0.00101324	10	0.00120197	5	0.000568789	11	0.000458754	6	0.000636359	7	0.000723805	6	0.00152974	6	0.000242772	4	0.000460302	8	0.000726527	9	0.00106419	16	0.00120775	4	0.000687834	10	0.000233853	3	0.00110742	19	0.00047474	7	0.00139239	15	0.0014405	24	0.000837455	12	0.000402889	8	0.00112093
go	GO:0016885	ligase activity, forming carbon-carbon bonds	0.000333837	1			0.000544899	3													0	0					3.39214e-05	1							0	0					0	0
go	GO:0016887	ATP hydrolysis activity			0.00036383	5	0.000503885	5	0.00118919	6	0.000450642	2	0.000191947	4	0.000682315	3	0.00112768	7	1.31289e-05	1	0.00141236	5	0.00142098	9	0.000787726	5	0.000234631	3	2.39542e-05	1	0	0			0	0	0.000246996	5	0.000814668	6	0.000240228	3	0.00330926	8	0.000144654	2	0.000346446	2	2.86857e-05
go	GO:0016903	oxidoreductase activity, acting on the aldehyde or oxo group of donors	0.00208409	11	0.00362375	25	0.00638907	34	0.0052586	32	0.00712075	12	0.00900487	25	0.00887935	21	0.00655241	18	0.00424545	23	0.00501363	21	0.00788773	22	0.00433159	14	0.00649549	19	0.00446902	19	0.0096771	12	0.00352408	25	0.00616354	12	0.00483797	20	0.00422513	26	0.00675821	25	0.0049964	33	0.00870211	21	0.00106292	13	0.00347416
go	GO:0016987	sigma factor activity	0	0											3.3837e-05	1			2.63465e-05	1	0.000875428	2													5.84373e-05	1					0.000134472	1							9.17981e-05
go	GO:0017076	purine nucleotide binding	0.106365	222	0.0652389	238	0.0396948	223	0.0630834	210	0.0894653	206	0.0522993	194	0.0892988	200	0.108685	234	0.0710733	194	0.0801982	188	0.0807075	206	0.05584	151	0.069646	199	0.0776037	196	0.115035	180	0.067289	222	0.0742288	188	0.0811658	261	0.0636368	214	0.0832028	229	0.0391439	171	0.0808833	212	0.0674421	215	0.0968718
go	GO:0017111	ribonucleoside triphosphate phosphatase activity	0.000961858	2	0.000573808	6	0.00136243	7	0.00118919	6	0.000785143	5	0.000326806	5	0.000682315	3	0.0017675	10	1.31289e-05	1	0.00141236	5	0.0014239	10	0.00156677	7	0.000374712	5	2.39542e-05	1	0.000722613	2			0	0	0.00140677	7	0.000857304	7	0.00104568	7	0.00330926	8	0.000665062	4	0.000346446	2	0.00434982
go	GO:0018455	alcohol dehydrogenase [NAD(P)+] activity	0.000230696	1	0.00023679	1	0.000227184	2	0.000300753	3	0.000451319	4	0.00010483	2					0.000129257	3			0.000157539	2	3.71253e-05	1			0.000175239	3	0	0	5.61735e-05	2	0	0	0.000172771	2			9.33616e-05	1	0.000125471	1	0.000194487	1	0.000876647	3
go	GO:0018551	dissimilatory sulfite reductase activity
go	GO:0018904	ether metabolic process					2.85211e-05	1	8.7473e-05	2			7.30254e-05	1	3.10032e-05	1					6.53021e-05	1	7.27035e-05	1			0.000114515	2									0.000142655	3	6.12274e-05	2	0.000135284	2	2.91251e-05	1			0.000554926	7
go	GO:0019001	guanyl nucleotide binding	0.000961858	2	0.000475103	3	0.000986029	3	2.40936e-05	1	0.000816789	5	0.000134859	1	0.000959027	4	0.00063982	3	0.000209852	2			2.91988e-06	1	0.000830167	3	0.00444932	5			0.00114858	3			0	0	0.00115977	2	0.000844396	5	0.000805457	4	7.74265e-06	1	0.000520407	2	2.66935e-05	1	0.00451283
go	GO:0019152	acetoin dehydrogenase (NAD+) activity	4.57428e-05	1	2.01979e-05	1					4.78235e-05	1			0	0	4.07213e-05	1															0.00024352	1	0	0	6.10421e-05	1							2.90334e-05	1
go	GO:0019200	carbohydrate kinase activity	0.000296073	2	0.000995705	11	0.000615911	6	0.00240973	7	6.4843e-05	1	0.000118417	3	0.000212815	5	0.00173257	11	0.000360005	8	0.00299225	5	0.00028371	4	0.000768974	3	6.04911e-05	1	0.00140997	8	0.000578732	2	0.000642138	5	0.000205374	3	0.00029053	5	0.000538525	7	0.000945171	9	0.000697442	9	0.000378348	5	3.61954e-05	2	0.00116513
go	GO:0019205	nucleobase-containing compound kinase activity	9.72911e-05	1	0.000332633	3	0.000125933	2	6.83854e-05	1	0.000544713	2	3.05085e-05	1	4.26345e-05	2	0.00011419	2											0.00014417	1	0.00107945	3			4.09673e-05	1	6.75097e-05	1	0.00010501	5	0.000217574	5			2.9083e-05	1	0.000108575	2
go	GO:0019219	regulation of nucleobase-containing compound metabolic process	0.00201867	16	0.0011595	21	0.00144669	20	0.00169464	11	0.00227805	18	0.00106361	12	0.00626769	25	0.00156476	17	0.00129127	24	0.0194472	26	0.00283365	18	0.0289072	17	0.00175619	12	0.00489963	20	0.000441762	3	0.00754692	26	0.00240784	25	0.00343718	28	0.0047567	38	0.00179112	23	0.0121798	40	0.00272651	21	0.00137094	17	0.00190699
go	GO:0019222	regulation of metabolic process	0.00302588	25	0.00443686	36	0.00324619	31	0.00475583	24	0.00909892	36	0.00135678	17	0.00777065	39	0.00325472	31	0.00262001	39	0.0242645	37	0.00428716	26	0.0309016	27	0.00292552	23	0.00567129	29	0.000716578	5	0.00929955	39	0.00367061	35	0.00403964	36	0.00604075	47	0.00291039	35	0.0127654	48	0.00436759	37	0.00240418	26	0.00277096
go	GO:0019238	cyclohydrolase activity			2.33394e-05	1			5.72897e-05	1							0.00199872	3	4.42057e-05	2	0.000403938	3	0.000148074	3			0.000187355	2	3.76373e-05	1	0.000391546	3	2.73887e-05	1	0	0	9.34447e-05	2	0.000298323	2	0.000413658	2	0.000297067	2	0.000108847	2	0.000185072	2	4.50622e-05
go	GO:0019239	deaminase activity	0.000111053	2	0.000233778	2	6.1504e-05	1															0	0							0	0			0	0			2.50109e-05	1							0.000254823	1	0.000147352
go	GO:0019251	anaerobic cobalamin biosynthetic process	0.000747713	3	5.63778e-05	1	3.21831e-05	1	0.000388664	1	8.4846e-05	1	8.53955e-05	2	0.00107816	5	0.000213846	2					0	0	0	0	0.000415293	4	0	0	0.0072486	5	0.000237714	2	0	0			0.000436946	3	1.83312e-05	1	7.7817e-05	2	0.000104473	2	0.000263509	2	5.78553e-05
go	GO:0019317	fucose catabolic process	0.00013199	1							0	0													0.000135923	1					0.000506137	1											0.000100031	1
go	GO:0019318	hexose metabolic process	0.00013199	1	0.00163516	7	0.00109753	6	0.000142617	2	0.000293755	3	0.00120234	3	0.00169217	6	0.000369363	6			0.00188167	3	0.00102329	5	0.000439169	4	0.000782605	7	5.35556e-05	1	0.00148145	5	0.000901136	5	0	0	0.00260928	3	0.000260815	3	0.000171629	2	0.000204263	3	0.0042026	5	0.00051374	3	4.51478e-05
go	GO:0019319	hexose biosynthetic process			8.55595e-05	1	0.000283416	2	6.49666e-05	1			0.000202242	1	0.00108838	2	0.000120211	2					0.000751388	3	0.000129659	1	0.000511867	4	5.35556e-05	1											9.39491e-05	1	5.69702e-05	1	0.000164718	2
go	GO:0019320	hexose catabolic process	0.00013199	1			4.35878e-05	1			0	0											9.26201e-05	1	0.000135923	1	3.11849e-05	1			0.000506137	1					1.21513e-05	1	2.56515e-05	1			0.000100031	1
go	GO:0019346	transsulfuration			0.000653575	2	0.000977405	6	6.97097e-05	2					0.00018612	1											0.000224779	1	0.000538705	2	9.21347e-05	1	4.1914e-05	1			0.00141889	7			0.000279189	3	2.49143e-05	1					0.000428318
go	GO:0019362	pyridine nucleotide metabolic process	0.00150442	4	0.000663282	8	0.00123876	12	0	0	0.000388911	4	0.00114584	6	0.00158277	8	0.00373246	13	0.000348245	5	0.000452813	2	0.00163167	7	0.00650624	12	0.000773859	2	9.54006e-05	2	0.000331621	2	0	0	6.21318e-05	2	0.000120769	3	0.000294394	7	0.00218839	5	0.000117348	4	0.00124902	8	3.00672e-05	1	8.97674e-05
go	GO:0019364	pyridine nucleotide catabolic process	0.00142773	3	0.000663282	8	0.00113777	10			0.000388911	4	0.00114584	6	0.00158277	8	0.0035468	11	0.000348245	5	0.000452813	2	0.00163167	7	0.00650624	12	0.000773859	2	9.54006e-05	2	0.000331621	2	0	0	6.21318e-05	2	0.000120769	3	0.000251005	6	0.00218839	5	0.000117348	4	0.00083926	7	3.00672e-05	1	8.97674e-05
go	GO:0019400	alditol metabolic process	2.50851e-05	1	6.86458e-05	1	2.56351e-05	1	0.000334338	3	0.000211275	3							5.79523e-05	1					2.93756e-05	1			7.72628e-05	1					2.86446e-05	1							4.21883e-05	1			3.03084e-05	1
go	GO:0019402	galactitol metabolic process	2.50851e-05	1			2.56351e-05	1	0.000110723	2	0.000116098	2							5.79523e-05	1															2.86446e-05	1							4.21883e-05	1			3.03084e-05	1
go	GO:0019538	protein metabolic process	0.353404	988	0.392361	1516	0.383796	1426	0.371923	1323	0.368816	942	0.397484	1605	0.334512	999	0.313163	939	0.471752	1468	0.263513	793	0.389938	1120	0.369125	1093	0.349963	1202	0.357689	1183	0.247139	447	0.357699	1170	0.406877	1360	0.437095	1610	0.318001	1296	0.370648	1254	0.357297	1747	0.380635	1201	0.40688	1425	0.375093
go	GO:0019605	butyrate metabolic process			0.000122961	2	3.15641e-05	1					0.000156729	1																													2.19863e-05	1
go	GO:0019627	urea metabolic process	0.00111354	3	0.0017923	8	0.00335711	8	0.00326068	6	0.000631957	4	0.00229506	8	0.000575193	3	0.000950752	3	0.00114766	5	0.0054813	7	0.00144425	5	0.000694707	5	0.00225383	6	0.000556814	2	0.000814773	2	0.000583098	3	0.00165171	8	0.000821224	4	0.000884111	3	0.000269967	2	0.000807737	5	0.000540757	4	0.00124246	5	0.0010429
go	GO:0019637	organophosphate metabolic process	0.00327316	10	0.00207051	19	0.00291992	26	0.00144675	9	0.00173152	11	0.00296278	19	0.00518585	20	0.00498181	20	0.00138334	13	0.00572258	14	0.00406411	21	0.00757707	15	0.00354932	17	0.00127049	10	0.00784637	16	0.0016761	15	0.00103997	7	0.00106241	15	0.00256215	22	0.00394349	19	0.00140126	17	0.00352034	24	0.000940106	7	0.00432709
go	GO:0019693	ribose phosphate metabolic process	0.00318013	8	0.00190685	17	0.00272669	22	0.00117043	7	0.00173152	11	0.00296278	19	0.00343131	15	0.00479615	18	0.00137071	12	0.00514359	11	0.00378324	20	0.0073494	14	0.00334291	15	0.00127049	10	0.00720129	11	0.0016761	15	0.00103997	7	0.000943763	11	0.00246697	18	0.00357835	14	0.00137908	16	0.00311058	23	0.000940106	7	0.00366489
go	GO:0019730	antimicrobial humoral response	0.000246748	1	0.000572027	2	0.000824757	2	0.00357746	3	5.67988e-05	1	0.000479807	1	8.86781e-05	1	0.000165931	1	0.000712414	1	0.00426949	1	0.000663748	2	0.000479855	1	0.000183679	1	0.000241902	1	0.000361382	1	0.0013035	3	0.000201749	1	5.20635e-05	1	0.00108121	1	0.000137512	1	0.00125162	3	0.000343006	1	0.000662021	2	0.000176012
go	GO:0019751	polyol metabolic process	2.50851e-05	1	6.86458e-05	1	2.56351e-05	1	0.00056684	4	0.000211275	3							7.05803e-05	2					2.93756e-05	1			7.72628e-05	1					2.86446e-05	1							4.21883e-05	1	0.000375529	2	3.03084e-05	1	0.000979002
go	GO:0019752	carboxylic acid metabolic process	0.00714988	14	0.00761158	34	0.00834249	35	0.0055785	20	0.00779032	16	0.00649244	24	0.0147933	22	0.0131917	25	0.00113005	15	0.00594418	18	0.00352725	22	0.0119835	22	0.00741888	33	0.00583815	15	0.0104999	24	0.00384696	16	0.00677411	7	0.00618223	29	0.00548194	30	0.00671197	21	0.00766837	41	0.00599724	25	0.000715331	11	0.00659434
go	GO:0019829	ATPase-coupled monoatomic cation transmembrane transporter activity	0.00175239	5	0.00108349	10	0.0012962	6	0.00119975	7	0.0012379	5	0.00154483	9	0.00157643	5	0.000647853	3	0.000215962	4	0.00463547	8	0.00178321	8	0.000843158	2	0.00130779	5	0.000750669	5	0.00631208	7	0.00194688	12	0.000819776	3	0.000676757	2	0.00126506	6	0.000905725	5	0.00113277	11	0.00151493	9	0.000792759	3	0.00108393
go	GO:0019842	vitamin binding	2.98057e-05	1	0.000929806	9	0.00208779	13	0.000308661	4			0.000111216	2	0.000656606	2	0.00149603	6	6.29177e-05	2	0.000396614	2	0.000153264	4	0.00129798	6	0.000452379	4	0.000613888	4	0.000559255	3	0.000312056	5	0	0	0.00198322	9	0.000566565	6	0.000464485	6	0.00019295	4	0.000374822	6	0.0002404	4	0.00075741
go	GO:0019843	rRNA binding	0.0288301	79	0.026248	116	0.0230758	105	0.0235085	104	0.030145	83	0.0280577	130	0.0304082	83	0.0238251	81	0.0434542	102	0.0150976	63	0.0260293	102	0.0175571	92	0.0255355	108	0.0311819	112	0.0186376	36	0.0446438	111	0.0305266	102	0.0293949	124	0.0265257	103	0.0345821	95	0.0247321	123	0.0233374	97	0.0175684	94	0.036926
go	GO:0019866	organelle inner membrane	0.000253893	2			0.000303108	3					4.0148e-05	1			0.000115973	1	5.17646e-05	1	0.000260799	2	0.000101685	1					2.47903e-05	1			9.76656e-05	2					0.000287922	3			8.78178e-05	1	0.000113143	1
go	GO:0019867	outer membrane					0.000337657	2									0.000109194	1			0.000434476	2	3.44134e-05	1	8.53885e-05	2					0.00288696	2					0.000931736	2	4.43292e-05	1					3.31907e-05	1	5.15341e-05	1
go	GO:0019899	enzyme binding	0.000607557	6	0.00272204	8	0.00150533	6	0.00249183	8	0.00176595	8	0.000218841	3	0.000957686	8	0.000171546	1	0.000167227	4	0.00444352	9	0.00099224	6	0.00139281	8	0.000241692	4	0.000547082	6	6.83518e-05	1	0.00103608	7	0.000417478	4	0.000360043	4	0.00101852	5	0.000367188	5	0.000397702	5	0.00101686	7	0.000823377	6	0.000360198
go	GO:0020037	heme binding																					0.000101685	1																			8.78178e-05	1	0.000641919	6
go	GO:0022603	regulation of anatomical structure morphogenesis																					0	0
go	GO:0022604	regulation of cell morphogenesis																					0	0
go	GO:0022607	cellular component assembly	0.00045186	5	0.000213373	7	0.000313471	6	0.000370448	4	3.81625e-05	1	0.000344102	6			0.000419038	4	0.000107509	3	0.000402355	4	8.28914e-05	2	6.91079e-05	2	8.67536e-05	1	2.29876e-05	1	0.000194669	1	0.000185357	5	0.000147842	3	0.000113036	3	0.000426925	6	0.000354834	5	0.000465513	10	0.000590469	6			0.000487888
go	GO:0022625	cytosolic large ribosomal subunit	0.160971	519	0.184051	760	0.180631	739	0.178509	709	0.191631	517	0.186218	783	0.157669	508	0.144694	498	0.243182	833	0.146303	455	0.191675	588	0.173649	530	0.173209	616	0.166394	607	0.149982	294	0.161282	598	0.201695	688	0.202462	793	0.136046	676	0.153133	603	0.186492	956	0.174415	589	0.176507	661	0.187833
go	GO:0022626	cytosolic ribosome	6.7472e-05	1									0.000138157	2	0.000591791	1			0.00020756	3	4.09096e-05	1			7.95788e-05	1	3.21626e-05	1	2.94803e-05	1					0.000169061	2	4.69135e-05	1	8.8827e-05	1			0.000212761	1	0.0009102	2	9.6566e-05	1
go	GO:0022627	cytosolic small ribosomal subunit	0.227559	585	0.263659	933	0.24947	861	0.23935	788	0.219434	530	0.271653	1018	0.213814	608	0.196976	547	0.281308	804	0.147735	438	0.244456	671	0.240016	664	0.215938	714	0.223008	692	0.134111	234	0.233329	714	0.256027	813	0.279848	984	0.209547	775	0.239932	759	0.219468	1023	0.246252	742	0.26929	892	0.234171
go	GO:0022803	passive transmembrane transporter activity	0.00175239	5	0.000862722	6	0.001423	6	0.00112342	6	0.0012379	5	0.0015668	10	0.0014726	4	0.000647853	3	0.000205308	3	0.00537071	12	0.00171592	8	0.000843158	2	0.00130779	5	0.000739918	4	0.00631208	7	0.00136998	9	0.000819776	3	0.000710086	3	0.00126506	6	0.00096028	6	0.00136895	10	0.00160442	10	0.00096601	6	0.00108393
go	GO:0022804	active transmembrane transporter activity	0.0101438	22	0.00307971	33	0.00370638	29	0.0054078	29	0.010999	28	0.010302	49	0.0127855	34	0.00846264	33	0.00668032	32	0.00934192	22	0.00635405	33	0.00880506	36	0.00276411	20	0.00660988	34	0.012515	21	0.0103492	34	0.00767778	31	0.00604545	36	0.00631172	29	0.00440857	23	0.00685054	35	0.0103436	36	0.00844837	28	0.00706857
go	GO:0022853	active monoatomic ion transmembrane transporter activity	0.00175239	5	0.00108349	10	0.00163375	9	0.00119975	7	0.00126165	6	0.00158498	10	0.00160152	6	0.000647853	3	0.000267727	5	0.00473158	9	0.00188489	9	0.000843158	2	0.00134543	6	0.00078352	6	0.00631208	7	0.00208436	14	0.000819776	3	0.000676757	2	0.00153426	9	0.000967518	6	0.00122059	12	0.00170022	11	0.000792759	3	0.00108393
go	GO:0022857	transmembrane transporter activity	0.011284	28	0.0073469	48	0.00957374	53	0.0103582	45	0.0122113	34	0.0110214	55	0.0131552	37	0.0107504	41	0.00679238	34	0.0118459	38	0.00834706	43	0.00950139	41	0.00420091	29	0.00767344	42	0.033041	43	0.0109019	39	0.00813769	39	0.00770988	47	0.0064874	32	0.00726068	35	0.00876575	59	0.0136762	51	0.00924962	38	0.0126695
go	GO:0022870	protein-N(PI)-phosphohistidine-mannose phosphotransferase system transporter activity											7.47672e-05	1	0.000129639	3			6.30867e-05	1															0.000290607	3			3.90208e-05	1							0.000129782	1	4.92293e-05
go	GO:0022890	inorganic cation transmembrane transporter activity	0.00941982	17	0.00607232	35	0.007883	40	0.0093539	35	0.0107436	28	0.00821249	34	0.00967953	17	0.00742412	22	0.00555395	19	0.00846928	23	0.00484367	21	0.00821867	29	0.00349848	19	0.00641373	26	0.030312	31	0.010578	32	0.00719164	29	0.00476997	23	0.00452545	17	0.00639838	24	0.00384555	35	0.0102418	34	0.00812722	23	0.00902798
go	GO:0030001	metal ion transport	0.00205387	8	0.000970354	9	0.00143366	8	0.00116139	5	0.00116833	4	0.0015926	11	0.000940905	2	0.000561839	2	0.000181496	3	0.00513072	10	0.00133197	5	0.00110698	4	0.00147703	8	0.000758868	4	0.00674562	8	0.00126197	8	0.000819776	3	0.00125142	4	0.00120901	4	0.000624258	2	0.00114992	10	0.00140455	9	0.000928635	6	0.00111852
go	GO:0030030	cell projection organization	6.32356e-05	1																			0	0					2.29876e-05	1			6.70683e-05	2	0	0							8.90736e-05	3
go	GO:0030031	cell projection assembly	6.32356e-05	1																			0	0					2.29876e-05	1			6.70683e-05	2	0	0							8.90736e-05	3
go	GO:0030141	secretory granule	0.000246748	1	0.000572027	2	0.000824757	2	0.00357746	3	5.67988e-05	1	0.000479807	1	8.86781e-05	1	0.000165931	1	0.000712414	1	0.00426949	1	0.000663748	2	0.000479855	1	0.000183679	1	0.000241902	1	0.000361382	1	0.0013035	3	0.000201749	1	5.20635e-05	1	0.00108121	1	0.000137512	1	0.00125162	3	0.000376197	2	0.000662021	2	0.000176012
go	GO:0030145	manganese ion binding	0.00013199	1			4.35878e-05	1			0	0											9.26201e-05	1	0.000135923	1	0.000130557	1			0.000604455	2											0.000100031	1					0
go	GO:0030162	regulation of proteolysis	0.000607557	6	0.00272204	8	0.00150533	6	0.00249183	8	0.00176595	8	0.000218841	3	0.000957686	8	0.000171546	1	0.000167227	4	0.00444352	9	0.00099224	6	0.00164178	10	0.000183789	3	0.000547082	6	0	0	0.00103608	7	0.000417478	4	0.000360043	4	0.00101852	5	0.000367188	5	0.000397702	5	0.00101686	7	0.000823377	6	0.000360198
go	GO:0030170	pyridoxal phosphate binding	2.98057e-05	1	0.000737338	4	0.00192247	11	6.97097e-05	2			7.10677e-05	1	0.000656606	2	0.00109377	3			0.000396614	2	5.93304e-05	1	0.00101582	3	0.000224779	1	0.000575843	3	9.21347e-05	1	0.000248625	4	0	0	0.00144189	8	0.000396017	4	0.000464485	6	2.49143e-05	1	0.00026802	3			0.000502195
go	GO:0030234	enzyme regulator activity	0.000930041	7	0.00367455	14	0.00227975	13	0.00249183	8	0.00176595	8	0.000302246	4	0.00112304	9	0.000668546	5	0.000229293	5	0.00444352	9	0.00099224	6	0.00278033	13	0.000987291	10	0.000649065	7	0.000325535	3	0.00105663	8	0.000583495	7	0.000869241	8	0.00101852	5	0.000591445	7	0.000397702	5	0.00103409	8	0.000968953	8	0.0011313
go	GO:0030246	carbohydrate binding	0	0					0.000236747	1	0.000572686	3					0.000228774	1	2.00852e-05	1			0.000360405	2	2.41129e-05	1			0	0	0.002461	1											0.000212958	1			4.56017e-05	1
go	GO:0030247	polysaccharide binding							0.000236747	1							0.000228774	1													0.002461	1															4.56017e-05	1
go	GO:0030414	peptidase inhibitor activity	0.000607557	6	0.00272204	8	0.00150533	6	0.00249183	8	0.00176595	8	0.000218841	3	0.000957686	8	0.000171546	1	0.000229293	5	0.00444352	9	0.00099224	6	0.00135854	7	0.000283863	5	0.000547082	6	0.000272871	2	0.00103608	7	0.000417478	4	0.000360043	4	0.00101852	5	0.000422267	6	0.000397702	5	0.00101686	7	0.000823377	6	0.000360198
go	GO:0030420	establishment of competence for transformation							3.64127e-05	1	0.000450642	2					0.000245229	2			4.15405e-05	1															0.000116784	2			0.000240228	3	7.96643e-05	2
go	GO:0030435	sporulation resulting in formation of a cellular spore	0.0188087	31	0.00607494	25	0.00563937	20	0.00515691	15	0.0174564	32	0.00611917	22	0.00823144	19	0.0179916	45	0.0066359	33	0.023815	28	0.0157838	25	0.00782105	20	0.00933564	27	0.00967239	20	0.0050683	7	0.00682505	25	0.0151842	38	0.0145949	38	0.0094216	33	0.0123031	32	0.0093284	44	0.0126437	31	0.00697433	23	0.0124957
go	GO:0030508	obsolete thiol-disulfide exchange intermediate activity	0.000257913	1	0.000436729	8	0.00023514	5	0.000117343	3	0.000639722	3	0.000634263	7	0.000227033	3			0.000577478	8	0.000238782	3	0.000287962	2	4.16259e-05	1	0.000204662	4			0.000191571	3	0.00034911	5	0.000126416	2	0.000188579	6	0.000178013	4	0.000195638	3	0.000239897	4	0.000270606	4	0.00133338	13	8.75463e-05
go	GO:0030527	structural constituent of chromatin	0.0493063	143	0.0717265	242	0.0658546	223	0.0709917	209	0.0344378	144	0.0936584	344	0.0558983	170	0.0267364	115	0.100025	314	0.0727739	156	0.0321352	161	0.0328611	164	0.0460543	151	0.0376256	153	0.0122833	41	0.0577282	199	0.0612003	202	0.0498086	245	0.0744297	244	0.0390372	166	0.0965306	343	0.0466444	171	0.0499666	219	0.028922
go	GO:0030554	adenyl nucleotide binding	0.105403	220	0.0647638	235	0.0387088	220	0.0630593	209	0.0886486	201	0.0521645	193	0.0883398	196	0.108046	231	0.0708635	192	0.0801982	188	0.0807045	205	0.055061	149	0.0651967	194	0.0776037	196	0.114313	178	0.067289	222	0.0742288	188	0.080006	259	0.0627924	209	0.0823973	225	0.0391362	170	0.0803629	210	0.0674154	214	0.092359
go	GO:0030699	glycine reductase activity	0.000769161	6	0.00123191	5	4.40761e-05	1	0.000273805	2	0.000232882	1	0.000197279	2	0.000706323	6	0.000108733	2	4.00242e-05	2	0.00101117	6	0	0	0.00076716	6	0.000216079	3	0.000330548	4	0.00149785	4	0.000318952	3	0.000259873	3	0.000556984	5	0.000315951	3	0.000570126	4	9.75834e-05	2	0.000770709	6	0.00054976	5	0.00181522
go	GO:0030700	glycine reductase complex	0.000769161	6	0.00123191	5	4.40761e-05	1	0.000273805	2	0.000232882	1	0.000197279	2	0.000706323	6	0.000108733	2	4.00242e-05	2	0.00101117	6	0	0	0.00076716	6	0.000216079	3	0.000330548	4	0.00149785	4	0.000318952	3	0.000259873	3	0.000556984	5	0.000315951	3	0.000570126	4	9.75834e-05	2	0.000770709	6	0.00054976	5	0.00181522
go	GO:0030976	thiamine pyrophosphate binding					0.000137961	1																					3.80449e-05	1			6.34312e-05	1									2.53907e-05	1					0.000220623
go	GO:0031090	organelle membrane	0.000253893	2			0.000397783	5					6.21169e-05	2			0.000225167	2	5.17646e-05	1	0.00122578	7	0.000101685	1	8.53885e-05	2	0	0	2.47903e-05	1	0.000425965	1	9.76656e-05	2			3.33292e-05	1	0.000287922	3			0.000375849	5	0.000146333	2	5.15341e-05	1
go	GO:0031163	metallo-sulfur cluster assembly	0.000308642	2	0.000101795	5	0.000109738	3	5.38993e-05	1	3.81625e-05	1	0.000100108	2			9.85022e-05	1			5.02069e-05	1	2.15498e-05	1	6.91079e-05	2	0	0			0.000194669	1	2.06226e-05	1	5.50335e-05	2	2.89157e-05	1	0.000171368	3	0.000242415	4	1.52586e-05	1	0.000264895	3			0.000412116
go	GO:0031214	biomineral tissue development	0.000203167	1	0.000107813	1	0.000161706	1	0.000155134	1	7.30884e-05	1	0.000124081	1	3.80744e-05	1	0.000362702	1	2.73603e-05	1	0.000995163	1	0.000160313	1			5.44959e-05	1	0.000105402	1			0.00028402	1	3.38406e-05	1	2.37407e-05	1	6.55071e-05	1	7.79711e-05	1	8.75152e-05	1	0.000277934	1	8.73573e-05	1	0.000138373
go	GO:0031410	cytoplasmic vesicle	0.000246748	1	0.000572027	2	0.000824757	2	0.00357746	3	5.67988e-05	1	0.000479807	1	8.86781e-05	1	0.000165931	1	0.000712414	1	0.00426949	1	0.000663748	2	0.000479855	1	0.000183679	1	0.000241902	1	0.000361382	1	0.0013035	3	0.000201749	1	5.20635e-05	1	0.00108121	1	0.000137512	1	0.00125162	3	0.000376197	2	0.000662021	2	0.000176012
go	GO:0031469	bacterial microcompartment	0.0349461	54	0.0309691	93	0.040266	87	0.0496633	92	0.0238892	56	0.0276045	60	0.0259908	60	0.0235097	46	0.030449	57	0.087071	91	0.0372219	75	0.0245744	41	0.0428333	73	0.027941	63	0.0369663	43	0.0481978	82	0.0407304	68	0.0176426	64	0.0418828	83	0.0311244	67	0.0351394	92	0.0245694	77	0.0341133	72	0.0270403
go	GO:0031597	cytosolic proteasome complex																							0.00028324	3
go	GO:0031640	killing of cells of another organism	0.000449915	2	0.00067984	3	0.000986463	3	0.00373259	4	0.000129887	2	0.000603887	2	0.000126752	2	0.000528632	2	0.000739774	2	0.00526466	2	0.000824061	3	0.000479855	1	0.000238175	2	0.000347304	2	0.000361382	1	0.00158752	4	0.00023559	2	7.58042e-05	2	0.00114671	2	0.000215483	2	0.00133913	4	0.00062094	2	0.000749378	3	0.000314385
go	GO:0031974	membrane-enclosed lumen	0.000246748	1	0.000572027	2	0.000824757	2	0.00357746	3	5.67988e-05	1	0.000519955	2	8.86781e-05	1	0.000165931	1	0.000764178	2	0.00426949	1	0.000765432	3	0.000763095	4	0.000183679	1	0.000241902	1	0.000361382	1	0.0013035	3	0.000201749	1	5.20635e-05	1	0.00125175	3	0.000137512	1	0.00133943	4	0.000869818	5	0.000662021	2	0.000176012
go	GO:0031982	vesicle	0.000246748	1	0.000572027	2	0.000824757	2	0.00357746	3	5.67988e-05	1	0.000479807	1	8.86781e-05	1	0.000165931	1	0.000712414	1	0.00426949	1	0.000663748	2	0.000479855	1	0.000183679	1	0.000241902	1	0.000361382	1	0.0013035	3	0.000201749	1	5.20635e-05	1	0.00108121	1	0.000137512	1	0.00125162	3	0.000376197	2	0.000662021	2	0.000176012
go	GO:0031983	vesicle lumen	0.000246748	1	0.000572027	2	0.000824757	2	0.00357746	3	5.67988e-05	1	0.000479807	1	8.86781e-05	1	0.000165931	1	0.000712414	1	0.00426949	1	0.000663748	2	0.000479855	1	0.000183679	1	0.000241902	1	0.000361382	1	0.0013035	3	0.000201749	1	5.20635e-05	1	0.00108121	1	0.000137512	1	0.00125162	3	0.000343006	1	0.000662021	2	0.000176012
go	GO:0032107	regulation of response to nutrient levels			1.80107e-05	1											4.95853e-05	2									0.000493234	3	0.000101983	1					7.4953e-05	1											0.000145576	2
go	GO:0032502	developmental process	0.0190813	33	0.00618276	26	0.0069134	25	0.00531204	16	0.0175718	34	0.0062834	24	0.00826952	20	0.0183543	46	0.00671503	35	0.0292088	30	0.0166559	29	0.0179994	33	0.00939013	28	0.00977779	21	0.0050683	7	0.00715595	27	0.015258	40	0.0146814	40	0.0097304	38	0.0125427	35	0.00956445	46	0.0129216	32	0.00706169	24	0.0126341
go	GO:0032553	ribonucleotide binding	0.106487	220	0.0609312	234	0.0391817	219	0.0623507	209	0.0885467	199	0.0525158	198	0.0888068	196	0.108523	231	0.071237	197	0.0788707	185	0.0805365	204	0.0552881	150	0.0689841	197	0.0732818	198	0.114962	180	0.0675552	225	0.0742288	188	0.0784943	256	0.0638715	216	0.0824249	223	0.0376495	173	0.076692	211	0.0666321	209	0.0967379
go	GO:0032555	purine ribonucleotide binding	0.106139	218	0.0607571	232	0.0391627	218	0.0623507	209	0.0883781	197	0.0522592	193	0.0888068	196	0.108393	230	0.0709683	192	0.0788707	185	0.0805365	204	0.0552509	149	0.0688381	194	0.0731195	195	0.11467	177	0.0670549	221	0.0741231	187	0.0784943	256	0.0632691	211	0.0823817	222	0.0375065	170	0.0759403	205	0.0666321	209	0.0957252
go	GO:0032559	adenyl ribonucleotide binding	0.105177	216	0.060282	229	0.0381767	215	0.0623266	208	0.0875613	192	0.0521243	192	0.0878477	192	0.107753	227	0.0707584	190	0.0788707	185	0.0805336	203	0.0544719	147	0.0643888	189	0.0731195	195	0.113947	175	0.0670549	221	0.0741231	187	0.0773345	254	0.0624247	206	0.0815763	218	0.0374988	169	0.0754199	203	0.0666054	208	0.0912124
go	GO:0032561	guanyl ribonucleotide binding	0.000961858	2	0.000475103	3	0.000986029	3	2.40936e-05	1	0.000816789	5	0.000134859	1	0.000959027	4	0.00063982	3	0.000209852	2			2.91988e-06	1	0.000830167	3	0.00444932	5			0.00114858	3			0	0	0.00115977	2	0.000844396	5	0.000805457	4	7.74265e-06	1	0.000520407	2	2.66935e-05	1	0.00451283
go	GO:0032774	RNA biosynthetic process	0.00298094	22	0.00310381	30	0.00273203	33	0.00286344	22	0.00462867	25	0.00299915	28	0.00293246	20	0.00379833	24	0.00113534	15	0.00353259	16	0.00320772	21	0.00158747	15	0.00399935	26	0.00316025	18	0.00113839	6	0.00272764	21	0.00321409	32	0.00558453	36	0.00259994	27	0.0072027	32	0.00358525	42	0.00408514	22	0.00192025	26	0.00254326
go	GO:0032784	regulation of DNA-templated transcription elongation	0.00019061	1	7.42135e-05	2					4.16965e-05	1	5.95178e-05	2			0.000457914	5	7.36711e-05	3			8.75638e-05	1			5.33068e-05	1	5.34814e-05	1	0	0	0.00393158	5	0	0	0.000447509	4	0.000398547	6	0.000143279	3	0.000225429	4	0.000167395	2	2.29316e-05	1	3.69411e-05
go	GO:0032787	monocarboxylic acid metabolic process	0.00579911	7	0.00474756	20	0.00583205	23	0.00519208	13	0.0064396	6	0.00594028	19	0.0137544	16	0.011702	15	0.000656535	8	0.0038001	10	0.00286018	14	0.0119835	22	0.00362948	12	0.00511394	7	0.00830944	10	0.00334741	11	0.00677411	7	0.00378004	12	0.00395765	16	0.00544732	10	0.00535248	23	0.0023834	13	0.000507795	7	0.00574954
go	GO:0032940	secretion by cell			0.000155995	2	0.000148994	1	0.00101947	2			0.000471766	1	0.000389983	1							0.000565384	3			0.00014271	1			0.000165514	2	0.000852299	3	0.000435751	2	0.000296311	1					0.00041103	2	3.31907e-05	1	0.00023976	1
go	GO:0032954	regulation of cytokinetic process	6.72998e-05	1	7.57708e-05	2	0.000150646	2			0.00032901	3	6.67438e-05	2	6.58329e-05	1	0.000507004	3	0.000218622	2			5.70819e-05	2	6.81193e-05	1	0.000230805	1	0.000225897	3			4.17513e-05	1	0.00027698	6	0.00078713	7	0	0	0.000929879	4	4.85223e-05	1	0.000459431	4	2.35868e-05	1	0.000146947
go	GO:0032955	regulation of division septum assembly	6.72998e-05	1	7.57708e-05	2	0.000150646	2			0.00032901	3	6.67438e-05	2	6.58329e-05	1	0.000507004	3	0.000218622	2			5.70819e-05	2	6.81193e-05	1	0.000230805	1	0.000225897	3			4.17513e-05	1	0.00027698	6	0.00078713	7	0	0	0.000929879	4	4.85223e-05	1	0.000459431	4	2.35868e-05	1	0.000146947
go	GO:0032991	protein-containing complex	0.391744	1118	0.454082	1720	0.437219	1630	0.424098	1519	0.412808	1057	0.460418	1821	0.373743	1128	0.346087	1061	0.524999	1647	0.301695	922	0.440048	1277	0.416099	1209	0.392244	1350	0.391525	1314	0.319733	565	0.396787	1329	0.459294	1515	0.487913	1799	0.348438	1470	0.397192	1382	0.410704	2003	0.426871	1364	0.44761	1565	0.431578
go	GO:0033013	tetrapyrrole metabolic process	0.00102838	4	5.63778e-05	1	3.21831e-05	1	0.000388664	1	8.4846e-05	1	8.53955e-05	2	0.00107816	5	0.000213846	2			5.758e-05	1	0	0	0	0	0.000415293	4	0	0	0.0072486	5	0.000266364	3	0	0			0.000436946	3	1.83312e-05	1	8.62543e-05	3	0.000104473	2	0.000263509	2	5.78553e-05
go	GO:0033014	tetrapyrrole biosynthetic process	0.00102838	4	5.63778e-05	1	3.21831e-05	1	0.000388664	1	8.4846e-05	1	8.53955e-05	2	0.00107816	5	0.000213846	2			5.758e-05	1	0	0	0	0	0.000415293	4	0	0	0.0072486	5	0.000266364	3	0	0			0.000436946	3	1.83312e-05	1	8.62543e-05	3	0.000104473	2	0.000263509	2	5.78553e-05
go	GO:0033036	macromolecule localization	0.000237078	3	0.00027457	5	0.000223299	2	0.00105589	3	0.000450642	2	0.000575422	4	0.000695135	3	0.000539738	5			4.15405e-05	1	0.000836681	4	0.000140243	3	0.00014271	1	0.000193286	2	0.000591479	3	0.000911702	4	0.000630584	6	0.000442935	5	0	0	0.000240228	3	0.000622232	7	0.000300173	3	0.000382157	5	0
go	GO:0033177	proton-transporting two-sector ATPase complex, proton-transporting domain	0.00244503	8	0.00423722	13	0.00551978	16	0.00559417	14	0.001376	7	0.00110161	8	0.00131061	5	0.00260439	8	0.000271254	3	0.00534573	12	0.00288088	9	0.00127566	5	0.00264891	12	0.00176563	10	0.0249149	22	0.00152884	8	0.00126666	10	0.00164973	9	0.00127345	4	0.00314901	9	0.00144901	12	0.00363926	12	0.00107583	5	0.00657131
go	GO:0033840	alpha-1,4-glucan glucosyltransferase (NDP-glucose donor) activity	0.000430196	2	6.50054e-05	2							0.000310332	1							3.71077e-05	1			7.2903e-05	1							0.000146962	2											0	0	7.7211e-05	1	0.000197141
go	GO:0034010	sulfolactate sulfo-lyase activity			8.38368e-05	2															0.00177788	6					0.000301538	4	8.42916e-05	2					6.75719e-05	1			0.00054102	3			1.28592e-05	1					0.000232491
go	GO:0034061	DNA polymerase activity															2.15392e-05	1			5.6582e-05	1	0.000214395	2													0	0
go	GO:0034062	5'-3' RNA polymerase activity	0.00292534	22	0.00316238	31	0.00327164	39	0.00311439	23	0.00462898	25	0.00326791	30	0.00333139	22	0.0038457	25	0.001109	14	0.00265717	14	0.00358858	23	0.00172786	16	0.00466217	29	0.00335892	19	0.00104505	6	0.00272764	21	0.00320603	31	0.00586533	39	0.00254555	26	0.00723637	33	0.00370235	42	0.00434855	23	0.00223936	28	0.0032823
go	GO:0034212	peptide N-acetyltransferase activity											0.000190542	1
go	GO:0034219	carbohydrate transmembrane transport	0.00818981	15	0.00194584	21	0.00211162	20	0.00420806	22	0.00968682	21	0.00821944	37	0.0106671	24	0.00752181	26	0.00637657	26	0.00456658	12	0.00284327	15	0.00791078	33	0.00110007	11	0.00576602	27	0.00517792	10	0.00824891	19	0.00608947	22	0.0048898	30	0.00327533	13	0.00339813	16	0.00265004	21	0.00864334	25	0.00752583	24	0.00591633
go	GO:0034220	monoatomic ion transmembrane transport	0.00249261	9	0.00446599	18	0.00559054	17	0.00585069	17	0.001376	7	0.00114939	10	0.00131061	5	0.00260439	8	0.000271254	3	0.00545596	13	0.00288088	9	0.00127566	5	0.00264891	12	0.00176563	10	0.0249149	22	0.00235692	15	0.00126666	10	0.00168306	10	0.00127345	4	0.00314901	9	0.0016007	14	0.00363926	12	0.00107583	5	0.00657131
go	GO:0034654	nucleobase-containing compound biosynthetic process	0.00481002	28	0.00448086	40	0.00440223	47	0.00394528	27	0.00597128	32	0.00501832	42	0.00481896	29	0.00527646	32	0.0021578	22	0.00831745	26	0.0053593	34	0.00265829	18	0.00677481	41	0.00433534	26	0.00865315	20	0.00438443	35	0.00419193	37	0.00650402	47	0.00491108	43	0.00877105	44	0.00477563	54	0.00635647	38	0.00283029	32	0.0066932
go	GO:0034655	nucleobase-containing compound catabolic process	0.00170253	6	0.00129313	17	0.00128707	12	0.000158388	3	0.000696007	6	0.00123422	9	0.00201303	13	0.00483291	22	0.00124146	18	0.000699887	3	0.00209294	9	0.00676082	14	0.00151255	10	0.000319986	5	0.0044835	4	0.000910349	8	0.000986122	9	0.000319103	8	0.00035608	8	0.00274607	11	0.000424944	12	0.00133827	14	0.000393273	5	0.000165272
go	GO:0034702	monoatomic ion channel complex	0.00175239	5	0.000836136	5	0.00125769	6	0.000998683	3	0.00116833	4	0.00154483	9	0.000940905	2	0.000561839	2	0.000170343	2	0.00448998	6	0.00128558	4	0.000843158	2	0.00124954	4	0.000726017	3	0.00631208	7	0.00110931	6	0.000819776	3	0.000676757	2	0.00120901	4	0.000624258	2	0.000874757	6	0.00125467	6	0.000716411	3	0.00108393
go	GO:0034703	cation channel complex	0.00175239	5	0.000836136	5	0.00125769	6	0.000998683	3	0.00116833	4	0.00154483	9	0.000940905	2	0.000561839	2	0.000170343	2	0.00448998	6	0.00128558	4	0.000843158	2	0.00124954	4	0.000726017	3	0.00631208	7	0.00110931	6	0.000819776	3	0.000676757	2	0.00120901	4	0.000624258	2	0.000874757	6	0.00125467	6	0.000716411	3	0.00108393
go	GO:0034774	secretory granule lumen	0.000246748	1	0.000572027	2	0.000824757	2	0.00357746	3	5.67988e-05	1	0.000479807	1	8.86781e-05	1	0.000165931	1	0.000712414	1	0.00426949	1	0.000663748	2	0.000479855	1	0.000183679	1	0.000241902	1	0.000361382	1	0.0013035	3	0.000201749	1	5.20635e-05	1	0.00108121	1	0.000137512	1	0.00125162	3	0.000343006	1	0.000662021	2	0.000176012
go	GO:0035383	thioester metabolic process													0.00168923	2					0	0																			0.000186743	2
go	GO:0035556	intracellular signal transduction			5.04295e-05	1									0.000223505	3	5.37872e-05	2			0.000375195	3	0.000677962	3	0.000220113	3	4.79669e-05	1	0.00102325	2	0.000202466	1			0.000492482	1	5.4223e-05	1					9.06449e-06	1			3.64211e-05	1	0.000339199
go	GO:0035592	establishment of protein localization to extracellular region			0.000155995	2	0.000148994	1	0.00101947	2			0.000471766	1	0.000389983	1							0.000565384	3			0.00014271	1			0.000165514	2	0.000852299	3	0.000435751	2	0.000296311	1					0.00041103	2			0.00023976	1
go	GO:0035639	purine ribonucleoside triphosphate binding	0.106139	218	0.0607571	232	0.0391627	218	0.0623507	209	0.0883781	197	0.0522592	193	0.0888068	196	0.108393	230	0.0709683	192	0.0788707	185	0.0805365	204	0.0552509	149	0.0688381	194	0.0731195	195	0.11467	177	0.0670549	221	0.0741231	187	0.0784943	256	0.0632691	211	0.0823817	222	0.0374988	169	0.0759403	205	0.0666321	209	0.0957252
go	GO:0035821	modulation of process of another organism	0.000246748	1	0.000572027	2	0.000824757	2	0.00357746	3	5.67988e-05	1	0.000479807	1	8.86781e-05	1	0.000165931	1	0.000712414	1	0.00426949	1	0.000663748	2	0.000514121	2	0.000183679	1	0.000241902	1	0.000361382	1	0.0013035	3	0.000201749	1	5.20635e-05	1	0.00108121	1	0.000137512	1	0.00125162	3	0.000343006	1	0.000662021	2	0.000176012
go	GO:0036094	small molecule binding	0.14266	317	0.100802	378	0.0669766	352	0.119777	359	0.15074	350	0.115032	402	0.137202	337	0.179106	372	0.087382	288	0.100785	249	0.0937468	273	0.0976757	263	0.111505	335	0.109165	310	0.154374	241	0.115806	370	0.107176	313	0.12853	430	0.103179	378	0.113972	340	0.0807498	366	0.131089	371	0.104908	351	0.135249
go	GO:0042157	lipoprotein metabolic process	0.00182541	3			0.00139333	1			0.0044742	1							2.43548e-05	1																	0.000940697	1	0.000499405	1	3.77261e-05	1
go	GO:0042221	response to chemical			0.000138869	1	0.000148994	1	0.00101947	2			2.19689e-05	1			2.70123e-05	1			0.000110232	1	0.000179523	1	0.000362819	4							0.00100367	4			8.75522e-05	2	0.000385822	3			0.000530197	3	0.000526812	4	0.00023976	1	4.70181e-05
go	GO:0042364	water-soluble vitamin biosynthetic process	0.00113943	6	6.83184e-05	2	0.000100425	2	0.000388664	1	8.4846e-05	1	8.53955e-05	2	0.00107816	5	0.000213846	2					0	0	0	0	0.000415293	4	2.33993e-05	1	0.0072486	5	0.000266364	3	0	0	6.79341e-05	3	0.000661356	5	8.21591e-05	3	0.000108057	3	0.000133556	3	0.000263509	2	5.78553e-05
go	GO:0042398	modified amino acid biosynthetic process					6.82419e-05	1	4.81887e-05	1																			2.33993e-05	1											4.04245e-06	1	8.47899e-05	2	2.9083e-05	1
go	GO:0042578	phosphoric ester hydrolase activity			0.000309681	3	4.25602e-05	1	0.000239389	3			0.000376926	2	0.00166365	3	6.42577e-05	2			0.000188185	1					0.000133364	1	3.75665e-05	1	0.00100645	1	5.91832e-05	1			2.21515e-05	1	0	0	4.84665e-05	1			9.41785e-06	1	7.04199e-05	1
go	GO:0042625	ATPase-coupled ion transmembrane transporter activity	0.00175239	5	0.00108349	10	0.00125975	5	0.00119975	7	0.0012379	5	0.00154483	9	0.00157643	5	0.000647853	3	0.000215962	4	0.00452524	7	0.00178321	8	0.000843158	2	0.00130779	5	0.000750669	5	0.00631208	7	0.00177957	10	0.000819776	3	0.000676757	2	0.00126506	6	0.000905725	5	0.00109106	10	0.00139982	7	0.000792759	3	0.00108393
go	GO:0042626	ATPase-coupled transmembrane transporter activity	0.00178126	6	0.00113387	12	0.0012962	6	0.00119975	7	0.0012884	6	0.0020424	11	0.00199022	7	0.000906627	6	0.000251982	5	0.00467924	9	0.00281929	14	0.00089428	3	0.00162641	8	0.000750669	5	0.00690356	10	0.00196283	13	0.00125553	5	0.00112166	5	0.00239504	10	0.000948651	6	0.00411268	13	0.00151493	9	0.000792759	3	0.00113557
go	GO:0042726	flavin-containing compound metabolic process	0.000111053	2	1.19406e-05	1																															6.79341e-05	3	0.000224411	2	5.97855e-05	1	3.02396e-05	1
go	GO:0042727	flavin-containing compound biosynthetic process	0.000111053	2	1.19406e-05	1																															6.79341e-05	3	0.000224411	2	5.97855e-05	1	3.02396e-05	1
go	GO:0042742	defense response to bacterium	0.000449915	2	0.00067984	3	0.000986463	3	0.00373259	4	0.000129887	2	0.000603887	2	0.000126752	2	0.000528632	2	0.000739774	2	0.00526466	2	0.000824061	3	0.000479855	1	0.000238175	2	0.000347304	2	0.000361382	1	0.00158752	4	0.00023559	2	7.58042e-05	2	0.00114671	2	0.000215483	2	0.00133913	4	0.00062094	2	0.000749378	3	0.000314385
go	GO:0042777	proton motive force-driven plasma membrane ATP synthesis	0.00175239	5	0.000836136	5	0.00102219	3	0.000998683	3	0.00116833	4	0.00154483	9	0.000940905	2	0.000561839	2	0.000170343	2	0.00448998	6	0.00128558	4	0.000843158	2	0.00124954	4	0.000726017	3	0.00631208	7	0.00106005	5	0.000819776	3	0.000676757	2	0.00120901	4	0.000624258	2	0.000848537	5	0.00125467	6	0.000688235	2	0.00108393
go	GO:0042802	identical protein binding	0.000246748	1	0.000433158	1	0.000675763	1	0.00255798	1	5.67988e-05	1	0.000479807	1	8.86781e-05	1	0.000290274	3	0.000712414	1	0.00426949	1	0.000484225	1	0.000514121	2	0.000183679	1	0.000241902	1	0.000361382	1	0.000467145	1	0.000201749	1	5.20635e-05	1	0.00108121	1	0.000137512	1	0.000840586	1	0.000343006	1	0.000422261	1	0.00020116
go	GO:0042803	protein homodimerization activity	0.000246748	1	0.000433158	1	0.000675763	1	0.00255798	1	5.67988e-05	1	0.000479807	1	8.86781e-05	1	0.000181081	2	0.000712414	1	0.00426949	1	0.000484225	1	0.000514121	2	0.000183679	1	0.000241902	1	0.000361382	1	0.000467145	1	0.000201749	1	5.20635e-05	1	0.00108121	1	0.000137512	1	0.000840586	1	0.000343006	1	0.000422261	1	0.00020116
go	GO:0042886	amide transport			0.000138869	1	0.00022899	2	0.00105589	3	0.000472184	3					0.000245229	2			4.15405e-05	1	0.000476475	3					2.39542e-05	1			0.000836356	2			0.000264788	5			0.000240228	3	0.000687756	6	9.90338e-05	1	0.00023976	1
go	GO:0043021	ribonucleoprotein complex binding	0.00392858	17	0.00702688	22	0.0215403	35	0.00299057	19	0.00084759	8	0.00684425	28	0.00324347	12	0.00208006	11	0.00414705	23	0.00622682	23	0.00945468	23	0.00568457	20	0.00912548	29	0.00155348	14	0.00342256	11	0.00326587	19	0.00947148	24	0.00527406	27	0.00816297	32	0.0087438	27	0.00733609	37	0.00483203	18	0.00459459	25	0.0132638
go	GO:0043022	ribosome binding	0.00392858	17	0.00702688	22	0.0215403	35	0.00299057	19	0.00084759	8	0.00684425	28	0.00324347	12	0.00208006	11	0.00414705	23	0.00622682	23	0.00945468	23	0.00568457	20	0.00912548	29	0.00155348	14	0.00342256	11	0.00326587	19	0.00947148	24	0.00527406	27	0.00816297	32	0.0087438	27	0.00733609	37	0.00483203	18	0.00459459	25	0.0132638
go	GO:0043024	ribosomal small subunit binding	0.00392858	17	0.00702688	22	0.0214331	34	0.00299057	19	0.00084759	8	0.00684425	28	0.00324347	12	0.00208006	11	0.00414705	23	0.00622682	23	0.00945468	23	0.00568457	20	0.00912548	29	0.00155348	14	0.00342256	11	0.00326587	19	0.00947148	24	0.00527406	27	0.00816297	32	0.0087438	27	0.00733609	37	0.00483203	18	0.00459459	25	0.0132638
go	GO:0043043	peptide biosynthetic process			0.000596523	3	0.000493078	3	5.74894e-05	1	6.09767e-05	2	0.000138157	2	0	0	0.000480848	2	4.48679e-05	1	4.09096e-05	1			7.9351e-05	1	3.21626e-05	1	0.000628704	3	0.00160984	3	4.93389e-05	1			0.000285997	2	0.000210067	3	0.000443454	1	0.000318564	3	0.000939806	3
go	GO:0043086	negative regulation of catalytic activity	0.000607557	6	0.00272204	8	0.00150533	6	0.00249183	8	0.00176595	8	0.000218841	3	0.000957686	8	0.000171546	1	0.000167227	4	0.00444352	9	0.00099224	6	0.00135854	7	0.000183789	3	0.000547082	6	0	0	0.00103608	7	0.000417478	4	0.000360043	4	0.00101852	5	0.000367188	5	0.000397702	5	0.00101686	7	0.000823377	6	0.000360198
go	GO:0043167	ion binding	0.14213	312	0.0994019	368	0.0663934	346	0.117627	352	0.149677	342	0.115032	402	0.136735	334	0.178814	368	0.0873287	287	0.100291	246	0.0931886	268	0.0968406	259	0.110334	324	0.109165	310	0.154009	238	0.115454	367	0.107176	313	0.125802	424	0.102893	376	0.113042	331	0.0803019	363	0.125002	360	0.104051	345	0.134089
go	GO:0043168	anion binding	0.106916	222	0.0649828	242	0.0413298	234	0.0624204	211	0.0885467	199	0.0526028	200	0.0894634	198	0.109666	235	0.0712481	198	0.0801647	189	0.0807804	208	0.0565678	155	0.0694039	200	0.0784041	204	0.115488	182	0.0678672	230	0.0742288	188	0.0804775	265	0.0646552	222	0.082948	230	0.0394798	178	0.0786045	224	0.0669087	214	0.0982457
go	GO:0043169	cation binding	0.0352143	90	0.0344192	126	0.0253564	115	0.0552306	142	0.0611299	143	0.0624696	203	0.0472718	136	0.069148	133	0.0161324	90	0.0202364	58	0.0126795	61	0.040324	105	0.0409303	124	0.0307384	106	0.0389468	57	0.0478176	140	0.0330528	126	0.0453243	159	0.0384436	157	0.0300942	101	0.0408475	186	0.0465455	139	0.0371421	131	0.0360642
go	GO:0043170	macromolecule metabolic process	0.358562	1024	0.396632	1561	0.387354	1470	0.376383	1354	0.374479	973	0.400731	1639	0.339564	1031	0.32034	982	0.474134	1504	0.286649	836	0.394838	1154	0.372766	1118	0.355777	1248	0.361237	1206	0.252955	459	0.362712	1207	0.411277	1402	0.444015	1657	0.321361	1335	0.38004	1310	0.373365	1831	0.385872	1239	0.410756	1467	0.379245
go	GO:0043207	response to external biotic stimulus	0.000449915	2	0.00067984	3	0.000986463	3	0.00373259	4	0.000129887	2	0.000603887	2	0.000126752	2	0.000528632	2	0.000739774	2	0.00526466	2	0.000858474	4	0.000559434	2	0.000238175	2	0.000347304	2	0.000361382	1	0.00158752	4	0.00023559	2	7.58042e-05	2	0.00114671	2	0.000215483	2	0.00133913	4	0.00062094	2	0.000749378	3	0.000314385
go	GO:0043211	ABC-type carbohydrate transporter activity									5.04922e-05	1			2.38043e-05	1	0.000201286	1			4.37703e-05	1	0	0			9.47041e-05	1									6.16399e-05	1	0.000100344	2	4.29268e-05	1
go	GO:0043226	organelle	0.382122	1028	0.421188	1594	0.421453	1495	0.417242	1380	0.372895	968	0.423119	1647	0.35754	1045	0.330171	957	0.487492	1481	0.369768	889	0.425418	1179	0.390998	1125	0.384927	1252	0.381427	1226	0.283198	484	0.401646	1233	0.440497	1398	0.446258	1636	0.358639	1362	0.395941	1285	0.396431	1818	0.402234	1262	0.435964	1469	0.398729
go	GO:0043227	membrane-bounded organelle	0.000246748	1	0.000640672	3	0.000954185	4	0.00357746	3	5.67988e-05	1	0.000744166	4	8.86781e-05	1	0.000391097	3	0.000764178	2	0.00453029	3	0.000765432	3	0.000970717	8	0.000183679	1	0.000241902	1	0.000787347	2	0.00140117	5	0.000201749	1	8.53927e-05	2	0.00136913	4	0.000137512	1	0.00133943	4	0.00111519	8	0.000662021	2	0.000176012
go	GO:0043228	membraneless organelle	0.381876	1027	0.420686	1592	0.420648	1492	0.414684	1379	0.372838	967	0.422375	1643	0.357452	1044	0.32978	954	0.486728	1479	0.365238	886	0.424832	1177	0.390107	1118	0.384744	1251	0.381185	1225	0.282411	482	0.401081	1230	0.440295	1397	0.446173	1634	0.35727	1358	0.395803	1284	0.395502	1816	0.401646	1258	0.435542	1468	0.398553
go	GO:0043229	intracellular organelle	0.382122	1028	0.421188	1594	0.421453	1495	0.417242	1380	0.372895	968	0.423119	1647	0.35754	1045	0.330171	957	0.487492	1481	0.369768	889	0.425418	1179	0.390998	1125	0.384927	1252	0.381427	1226	0.283198	484	0.40162	1232	0.440497	1398	0.446258	1636	0.358639	1362	0.395941	1285	0.396431	1818	0.402234	1262	0.435964	1469	0.398729
go	GO:0043231	intracellular membrane-bounded organelle	0.000246748	1	0.000640672	3	0.000954185	4	0.00357746	3	5.67988e-05	1	0.000744166	4	8.86781e-05	1	0.000391097	3	0.000764178	2	0.00453029	3	0.000765432	3	0.000970717	8	0.000183679	1	0.000241902	1	0.000787347	2	0.00140117	5	0.000201749	1	8.53927e-05	2	0.00136913	4	0.000137512	1	0.00133943	4	0.00111519	8	0.000662021	2	0.000176012
go	GO:0043232	intracellular membraneless organelle	0.381876	1027	0.420686	1592	0.420648	1492	0.414684	1379	0.372838	967	0.422375	1643	0.357452	1044	0.32978	954	0.486728	1479	0.365238	886	0.424832	1177	0.390107	1118	0.384744	1251	0.381185	1225	0.282411	482	0.401056	1229	0.440295	1397	0.446173	1634	0.35727	1358	0.395803	1284	0.395502	1816	0.401646	1258	0.435542	1468	0.398553
go	GO:0043233	organelle lumen	0.000246748	1	0.000572027	2	0.000824757	2	0.00357746	3	5.67988e-05	1	0.000519955	2	8.86781e-05	1	0.000165931	1	0.000764178	2	0.00426949	1	0.000765432	3	0.000763095	4	0.000183679	1	0.000241902	1	0.000361382	1	0.0013035	3	0.000201749	1	5.20635e-05	1	0.00125175	3	0.000137512	1	0.00133943	4	0.000869818	5	0.000662021	2	0.000176012
go	GO:0043419	urea catabolic process	0.00111354	3	0.0017923	8	0.00335711	8	0.00326068	6	0.000631957	4	0.00229506	8	0.000575193	3	0.000950752	3	0.00114766	5	0.0054813	7	0.00144425	5	0.000694707	5	0.00225383	6	0.000556814	2	0.000814773	2	0.000583098	3	0.00165171	8	0.000821224	4	0.000884111	3	0.000269967	2	0.000807737	5	0.000540757	4	0.00124246	5	0.0010429
go	GO:0043436	oxoacid metabolic process	0.00714988	14	0.00761158	34	0.00834249	35	0.0055785	20	0.00779032	16	0.00649244	24	0.0147933	22	0.0131917	25	0.00113005	15	0.00594418	18	0.00352725	22	0.0119835	22	0.00741888	33	0.00583815	15	0.0104999	24	0.00384696	16	0.00677411	7	0.00618223	29	0.00551045	31	0.00671197	21	0.00766837	41	0.00599724	25	0.000715331	11	0.00659434
go	GO:0043603	amide metabolic process	0.00111354	3	0.0017923	8	0.00342536	9	0.00326068	6	0.000631957	4	0.00243322	10	0.00226442	5	0.000950752	3	0.00114766	5	0.0055222	8	0.00144425	5	0.000694707	5	0.00228599	7	0.000580213	3	0.000814773	2	0.000583098	3	0.00165171	8	0.000822354	5	0.000972938	4	0.000545849	6	0.0010205	6	0.00148004	7	0.00127863	6	0.0010429
go	GO:0043604	amide biosynthetic process					6.82419e-05	1	0	0			0.000138157	2							4.09096e-05	1					3.21626e-05	1	2.33993e-05	1							1.1293e-06	1	8.8827e-05	1	8.9139e-05	2	0.000212761	1	0.000939283	3
go	GO:0043605	amide catabolic process	0.00111354	3	0.0017923	8	0.00335711	8	0.00326068	6	0.000631957	4	0.00229506	8	0.000575193	3	0.000950752	3	0.00114766	5	0.0054813	7	0.00144425	5	0.000694707	5	0.00225383	6	0.000556814	2	0.000814773	2	0.000583098	3	0.00165171	8	0.000821224	4	0.000884111	3	0.000269967	2	0.000807737	5	0.000540757	4	0.00124246	5	0.0010429
go	GO:0043648	dicarboxylic acid metabolic process	2.53283e-05	1	3.02088e-05	2	1.45027e-05	1	2.79852e-05	1	3.44919e-05	1	1.73286e-05	1			6.04428e-05	1	4.43123e-05	2	0.000924505	2	9.55138e-05	1					7.88827e-05	3	0.000135402	1							0.000445731	5	0.000255793	3	9.58254e-05	2
go	GO:0043711	pilus organization
go	GO:0043720	3-keto-5-aminohexanoate cleavage activity	4.80507e-05	1					0.000179535	2													0	0	0.000795255	4	6.89416e-05	2			9.71366e-05	1			2.51244e-05	1	0.000263343	3	0.00013428	1
go	GO:0043785	cinnamoyl-CoA:phenyllactate CoA-transferase activity							8.03554e-05	1	9.5274e-05	2			0.000200011	2													0.000134528	2									2.42025e-05	1							0.000205183	3
go	GO:0043873	pyruvate-flavodoxin oxidoreductase activity	0	0	0.00100867	5	0.00190923	11	0.000299304	3	0.00638412	8	0.00710075	15	0.00593329	10	0.00512924	9	0.00242261	12	0.00186209	9	0.00607267	14	0.00300127	7	0.00255352	8	0.00292044	7	0.00480147	4	4.1731e-05	1	0.00515611	5	0.00176351	11	0.000470186	5	0.000580201	6	0.0011332	8	0.00265688	8	0.000459607	9	0.000901001
go	GO:0043884	CO-methylating acetyl-CoA synthase activity	5.69956e-05	1	0.000545718	3					0.000649719	4	0	0	0.00271732	6	0.00130786	3			0.000228639	1			2.77895e-05	1			2.70224e-05	1			0.000579539	5	0	0	0.000129573	1	0.000143983	3	0.000380905	4	0.000632285	4	0.00016087	2			0.000293485
go	GO:0043885	anaerobic carbon-monoxide dehydrogenase activity			0.000112952	1	0.00111259	2							0.00168923	2																			0.000407629	1			7.19876e-05	1			0.000488723	1
go	GO:0043891	glyceraldehyde-3-phosphate dehydrogenase [NAD(P)+] (phosphorylating) activity	0.00137878	5	0.00133978	5	0.00156111	9	0.00124843	7	0.000736631	4	0.00172217	6	0.00092265	6	0.0011693	7	0.00157717	5	0.000904412	2	0.00107574	3	0.00129319	6	0.00253184	4	0.00125187	7	0.00114471	2	0.00127076	7	0.000153105	2	0.00281499	3	0.00178888	5	0.00139606	6	0.00160274	8	0.00504009	7	0.000282821	1	0.0020116
go	GO:0043934	sporulation	0.0188087	31	0.00607494	25	0.00563937	20	0.00515691	15	0.0174564	32	0.00611917	22	0.00823144	19	0.0179916	45	0.0066359	33	0.0282137	29	0.0157838	25	0.00782105	20	0.00933564	27	0.00967239	20	0.0050683	7	0.00682505	25	0.0152242	39	0.0146577	39	0.00946747	34	0.0123475	33	0.0093284	44	0.0126437	31	0.00697433	23	0.0124957
go	GO:0044087	regulation of cellular component biogenesis	6.72998e-05	1	7.57708e-05	2	0.000150646	2			0.00032901	3	6.67438e-05	2	6.58329e-05	1	0.000507004	3	0.000218622	2			5.70819e-05	2	0.000351359	4	0.000230805	1	0.000225897	3			4.17513e-05	1	0.00027698	6	0.00078713	7	0	0	0.000929879	4	4.85223e-05	1	0.000459431	4	2.35868e-05	1	0.000146947
go	GO:0044092	negative regulation of molecular function	0.000607557	6	0.00272204	8	0.00150533	6	0.00249183	8	0.00176595	8	0.000218841	3	0.000957686	8	0.000171546	1	0.000167227	4	0.00444352	9	0.00099224	6	0.00135854	7	0.000183789	3	0.000547082	6	0	0	0.00103608	7	0.000417478	4	0.000360043	4	0.00101852	5	0.000367188	5	0.000397702	5	0.00101686	7	0.000823377	6	0.000360198
go	GO:0044183	protein folding chaperone	0.10256	201	0.0574334	206	0.0351677	193	0.0600994	200	0.0858892	184	0.0504563	180	0.0856944	180	0.105465	211	0.0703672	182	0.0731035	175	0.077224	183	0.0528555	139	0.0623101	176	0.0710568	187	0.104217	154	0.0653004	206	0.0733034	184	0.0761757	236	0.0595441	186	0.0797268	199	0.0329605	149	0.0607058	177	0.0645537	198	0.0885454
go	GO:0044238	primary metabolic process	0.371103	1062	0.416543	1659	0.423972	1571	0.391858	1430	0.387396	1029	0.418058	1715	0.365375	1101	0.342353	1056	0.480827	1559	0.304321	887	0.419156	1246	0.39107	1169	0.378657	1347	0.372111	1261	0.278147	519	0.376785	1287	0.429402	1450	0.46161	1757	0.347726	1462	0.400381	1393	0.389788	1939	0.409579	1318	0.419239	1527	0.408292
go	GO:0044272	sulfur compound biosynthetic process							9.36397e-05	1	7.62146e-05	1			0.000186248	3	0.00021972	2	3.66437e-05	1							0.000741272	6			3.358e-05	1					0.000129195	2	0.000249205	2	0.000258964	3	5.06768e-05	1	0.000367342	2	9.45731e-05	2
go	GO:0044281	small molecule metabolic process	0.011389	31	0.013088	64	0.0147289	70	0.0122422	46	0.0105959	36	0.0118939	51	0.0222787	53	0.0161927	46	0.00340434	31	0.0187859	43	0.00792375	46	0.0140879	34	0.013816	69	0.00764731	26	0.0287215	53	0.00731633	43	0.0094323	21	0.0108821	57	0.00971066	61	0.00949176	47	0.0106878	73	0.0139173	55	0.00436109	37	0.0128968
go	GO:0044282	small molecule catabolic process	0.00124553	4	0.00209414	13	0.00367876	10	0.00326068	6	0.000631957	4	0.00242601	9	0.00097291	4	0.00101779	4	0.00114766	5	0.00558393	8	0.0019862	7	0.000873285	7	0.00228502	7	0.000556814	2	0.00399814	7	0.000700503	5	0.00165171	8	0.000881887	6	0.00112006	6	0.000681669	5	0.00105322	8	0.00101999	8	0.00124246	5	0.00203751
go	GO:0044283	small molecule biosynthetic process	0.00683625	16	0.00254182	16	0.00293489	17	0.00451792	19	0.00166315	12	0.00451274	18	0.00730773	16	0.00259215	14	0.000427959	6	0.0039175	11	0.00188431	14	0.00532877	8	0.00710897	37	0.000694507	8	0.0106424	20	0.00343995	11	0.00397006	4	0.00458417	20	0.00285529	23	0.000989141	10	0.00547038	31	0.00505539	20	0.000880943	11	0.00187245
go	GO:0044364	obsolete disruption of cells of another organism	0.000246748	1	0.000572027	2	0.000824757	2	0.00357746	3	5.67988e-05	1	0.000479807	1	8.86781e-05	1	0.000165931	1	0.000712414	1	0.00426949	1	0.000663748	2	0.000479855	1	0.000183679	1	0.000241902	1	0.000361382	1	0.0013035	3	0.000201749	1	5.20635e-05	1	0.00108121	1	0.000137512	1	0.00125162	3	0.000343006	1	0.000662021	2	0.000176012
go	GO:0044391	ribosomal subunit	0.38853	1104	0.447865	1695	0.43014	1601	0.417859	1497	0.411065	1047	0.45787	1801	0.371483	1116	0.34167	1045	0.52449	1637	0.294038	893	0.436131	1259	0.413665	1194	0.389147	1330	0.389429	1300	0.287271	531	0.394611	1312	0.457722	1501	0.485081	1779	0.345593	1451	0.393159	1365	0.405961	1979	0.420667	1331	0.445956	1554	0.422044
go	GO:0044419	biological process involved in interspecies interaction between organisms	0.000449915	2	0.00067984	3	0.000986463	3	0.00373259	4	0.000129887	2	0.000603887	2	0.000126752	2	0.000528632	2	0.000739774	2	0.00526466	2	0.000858474	4	0.0005937	3	0.000238175	2	0.000347304	2	0.000361382	1	0.00158752	4	0.00023559	2	7.58042e-05	2	0.00114671	2	0.000215483	2	0.00133913	4	0.00062094	2	0.000749378	3	0.000314385
go	GO:0044422	obsolete organelle part	0.00031422	2	0.000572027	2	0.000954185	4	0.00357746	3	5.67988e-05	1	0.000617964	3	0.00068047	2	0.000281904	2	0.000919974	4	0.0045712	4	0.000663748	2	0.000763095	4	0.000215841	2	0.000271383	2	0.000361382	1	0.00140117	5	0.00037081	3	9.89771e-05	2	0.00128741	3	0.000137512	1	0.00146438	4	0.00189316	8	0.000758587	3	0.000176012
go	GO:0044424	obsolete intracellular part	0.00031422	2	0.000640672	3	0.000954185	4	0.00357746	3	5.67988e-05	1	0.000820206	4	0.00163041	3	0.000711847	4	0.000919974	4	0.0045712	4	0.000663748	2	0.000763095	4	0.00109409	4	0.000271383	2	0.000361382	1	0.00140117	5	0.00037081	3	0.00016207	3	0.00128741	3	0.000137512	1	0.00146438	4	0.00202374	10	0.000758587	3	0.000176012
go	GO:0044431	obsolete Golgi apparatus part	0.000246748	1	0.000433158	1	0.000675763	1	0.00255798	1	5.67988e-05	1	0.000479807	1	8.86781e-05	1	0.000165931	1	0.000712414	1	0.00426949	1	0.000484225	1	0.000479855	1	0.000183679	1	0.000241902	1	0.000361382	1	0.000467145	1	0.000201749	1	5.20635e-05	1	0.00108121	1	0.000137512	1	0.000840586	1	0.000343006	1	0.000422261	1	0.000176012
go	GO:0044433	obsolete cytoplasmic vesicle part	0.000246748	1	0.000572027	2	0.000824757	2	0.00357746	3	5.67988e-05	1	0.000479807	1	8.86781e-05	1	0.000165931	1	0.000712414	1	0.00426949	1	0.000663748	2	0.000479855	1	0.000183679	1	0.000241902	1	0.000361382	1	0.0013035	3	0.000201749	1	5.20635e-05	1	0.00108121	1	0.000137512	1	0.00125162	3	0.000343006	1	0.000662021	2	0.000176012
go	GO:0044444	obsolete cytoplasmic part	0.00031422	2	0.000572027	2	0.000954185	4	0.00357746	3	5.67988e-05	1	0.000820206	4	0.00163041	3	0.000281904	2	0.000919974	4	0.0045712	4	0.000663748	2	0.000763095	4	0.000215841	2	0.000271383	2	0.000361382	1	0.00140117	5	0.00037081	3	9.89771e-05	2	0.00128741	3	0.000137512	1	0.00146438	4	0.0019247	9	0.000758587	3	0.000176012
go	GO:0044445	obsolete cytosolic part	6.7472e-05	1									0.000138157	2	0.000591791	1			0.00020756	3	4.09096e-05	1			0.00028324	3	3.21626e-05	1	2.94803e-05	1					0.000169061	2	4.69135e-05	1	8.8827e-05	1			0.000212761	1	0.0009102	2	9.6566e-05	1
go	GO:0044446	obsolete intracellular organelle part	0.00031422	2	0.000572027	2	0.000954185	4	0.00357746	3	5.67988e-05	1	0.000617964	3	0.00068047	2	0.000281904	2	0.000919974	4	0.0045712	4	0.000663748	2	0.000763095	4	0.000215841	2	0.000271383	2	0.000361382	1	0.00140117	5	0.00037081	3	9.89771e-05	2	0.00128741	3	0.000137512	1	0.00146438	4	0.00189316	8	0.000758587	3	0.000176012
go	GO:0044464	obsolete cell part	0.00031422	2	0.000640672	3	0.000954185	4	0.00357746	3	5.67988e-05	1	0.000820206	4	0.00163041	3	0.000940621	5	0.000919974	4	0.0045712	4	0.000663748	2	0.000763095	4	0.00109409	4	0.000271383	2	0.000361382	1	0.00140117	5	0.00037081	3	0.00016207	3	0.00128741	3	0.000137512	1	0.00146438	4	0.00202374	10	0.000804188	4	0.000176012
go	GO:0044620	ACP phosphopantetheine attachment site binding	0.0133221	39	0.0189299	74	0.0201494	54	0.0156613	56	0.0156974	35	0.00967484	42	0.0194291	52	0.0150797	45	0.00841073	38	0.019232	39	0.0140191	45	0.015097	32	0.0103599	54	0.0101367	44	0.0198868	34	0.0169256	56	0.0185631	48	0.0119676	56	0.00997046	40	0.0185333	57	0.0151	83	0.0105338	44	0.01793	60	0.0149925
go	GO:0044769	ATPase activity, coupled to transmembrane movement of ions, rotational mechanism	0.00175239	5	0.00108349	10	0.00125975	5	0.00119975	7	0.0012379	5	0.00154483	9	0.00157643	5	0.000647853	3	0.000215962	4	0.00452524	7	0.00178321	8	0.000843158	2	0.00130779	5	0.000750669	5	0.00631208	7	0.00177957	10	0.000819776	3	0.000676757	2	0.00126506	6	0.000905725	5	0.00109106	10	0.00139982	7	0.000792759	3	0.00108393
go	GO:0044877	protein-containing complex binding	0.00392858	17	0.00702688	22	0.0215403	35	0.00299057	19	0.00084759	8	0.00684425	28	0.00324347	12	0.00208006	11	0.00414705	23	0.00622682	23	0.00945468	23	0.00568457	20	0.00912548	29	0.00155348	14	0.00342256	11	0.00326587	19	0.00947148	24	0.00527406	27	0.00816297	32	0.0087438	27	0.00733609	37	0.00483203	18	0.00459459	25	0.0132638
go	GO:0045087	innate immune response	0.000246748	1	0.000572027	2	0.000824757	2	0.00357746	3	5.67988e-05	1	0.000479807	1	8.86781e-05	1	0.000165931	1	0.000712414	1	0.00426949	1	0.000663748	2	0.000479855	1	0.000183679	1	0.000241902	1	0.000361382	1	0.0013035	3	0.000201749	1	5.20635e-05	1	0.00108121	1	0.000137512	1	0.00125162	3	0.000343006	1	0.000662021	2	0.000176012
go	GO:0045152	antisigma factor binding	0.000412407	4	0.000142278	2			6.17925e-05	1	0.000196983	2	0.000110941	1	3.35704e-05	1	0.000188319	2	9.88948e-05	2					3.83478e-05	1	0.000244087	4	5.75474e-05	1			0.000657153	6	0.000311843	2	9.12271e-05	3	4.53414e-05	1	0.000209503	3	0.00033069	4	0.000197874	3	0.000680676	4	0.000256575
go	GO:0045184	establishment of protein localization	0.000237078	3	0.00027457	5	0.000223299	2	0.00105589	3	0.000450642	2	0.000575422	4	0.000695135	3	0.000539738	5			4.15405e-05	1	0.000836681	4	0.000140243	3	0.00014271	1	0.000193286	2	0.000591479	3	0.000911702	4	0.000630584	6	0.000442935	5	0	0	0.000240228	3	0.000622232	7	0.000300173	3	0.000382157	5	0
go	GO:0045259	proton-transporting ATP synthase complex	0.00175239	5	0.000836136	5	0.00125769	6	0.000998683	3	0.00116833	4	0.00154483	9	0.000940905	2	0.000561839	2	0.000170343	2	0.00448998	6	0.00128558	4	0.000843158	2	0.00124954	4	0.000726017	3	0.00631208	7	0.00110931	6	0.000819776	3	0.000676757	2	0.00120901	4	0.000624258	2	0.000874757	6	0.00125467	6	0.000716411	3	0.00108393
go	GO:0045302	choloylglycine hydrolase activity			0.00016678	2	0	0	7.35789e-05	2																																			0	0			0
go	GO:0045861	negative regulation of proteolysis	0.000607557	6	0.00272204	8	0.00150533	6	0.00249183	8	0.00176595	8	0.000218841	3	0.000957686	8	0.000171546	1	0.000167227	4	0.00444352	9	0.00099224	6	0.00135854	7	0.000183789	3	0.000547082	6	0	0	0.00103608	7	0.000417478	4	0.000360043	4	0.00101852	5	0.000367188	5	0.000397702	5	0.00101686	7	0.000823377	6	0.000360198
go	GO:0046031	ADP metabolic process	0.00142773	3	0.000663282	8	0.00113777	10			0.000388911	4	0.00114584	6	0.00158277	8	0.0035468	11	0.000348245	5	0.000452813	2	0.00163167	7	0.00650624	12	0.000773859	2	9.54006e-05	2	0.000331621	2	0	0	6.21318e-05	2	0.000120769	3	0.000251005	6	0.00218839	5	0.000117348	4	0.00083926	7	3.00672e-05	1	8.97674e-05
go	GO:0046032	ADP catabolic process	0.00142773	3	0.000663282	8	0.00113777	10			0.000388911	4	0.00114584	6	0.00158277	8	0.0035468	11	0.000348245	5	0.000452813	2	0.00163167	7	0.00650624	12	0.000773859	2	9.54006e-05	2	0.000331621	2	0	0	6.21318e-05	2	0.000120769	3	0.000251005	6	0.00218839	5	0.000117348	4	0.00083926	7	3.00672e-05	1	8.97674e-05
go	GO:0046034	ATP metabolic process	0.00318013	8	0.0018764	15	0.00263918	20	0.00108184	5	0.00173152	11	0.00296278	19	0.00343131	15	0.00477328	17	0.00137071	12	0.00514359	11	0.00360044	17	0.0073494	14	0.00329029	14	0.00127049	10	0.00685101	10	0.00147096	11	0.00103997	7	0.000860288	8	0.00188926	14	0.00309569	11	0.00128745	15	0.00305093	22	0.000940106	7	0.00329341
go	GO:0046040	IMP metabolic process			1.48749e-05	1	3.08795e-05	1	0	0							2.28706e-05	1					0.000107601	2									2.73887e-05	1			2.75821e-05	1	0.000190212	1	0.000435187	2	9.16304e-05	1	0	0			0.000371479
go	GO:0046112	nucleobase biosynthetic process			0	0	5.45745e-05	2			2.78541e-05	1			0.000469482	2											8.99966e-05	2			9.16333e-05	1	6.25099e-05	1					2.15605e-05	1	0.000369702	4			4.50203e-05	1
go	GO:0046364	monosaccharide biosynthetic process			8.55595e-05	1	0.000283416	2	6.49666e-05	1			0.000202242	1	0.00108838	2	0.000120211	2					0.000751388	3	0.000129659	1	0.000511867	4	5.35556e-05	1											9.39491e-05	1	5.69702e-05	1	0.000164718	2
go	GO:0046365	monosaccharide catabolic process	0.00013199	1			4.35878e-05	1			0	0	0.000130947	1									9.26201e-05	1	0.000135923	1	3.11849e-05	1			0.000506137	1					1.21513e-05	1	2.56515e-05	1			0.000100031	1
go	GO:0046390	ribose phosphate biosynthetic process	0.00175239	5	0.00124356	9	0.00151816	11	0.00108184	5	0.00134261	7	0.00201918	14	0.00184853	7	0.00147813	8	0.00102246	7	0.00469078	9	0.00215158	13	0.000843158	2	0.00256905	13	0.00117508	8	0.00686967	9	0.00165679	14	0.000977838	5	0.000822994	8	0.00221596	12	0.00138996	9	0.00116821	11	0.00227132	16	0.000910039	6	0.00357512
go	GO:0046394	carboxylic acid biosynthetic process	0.00569682	10	0.0023193	12	0.00261929	14	0.00383179	16	0.00136501	10	0.00442735	16	0.00514119	9	0.00225809	10	0.000415331	5	0.0039175	11	0.00113292	11	0.00519911	7	0.00618181	29	0.000640951	7	0.00339384	15	0.00317358	8	0.00397006	4	0.00451624	17	0.00219393	18	0.000817075	7	0.00530536	27	0.0047862	16	0.000617433	9	0.00181459
go	GO:0046417	chorismate metabolic process	2.53283e-05	1	3.02088e-05	2	1.45027e-05	1			3.44919e-05	1	1.73286e-05	1					4.43123e-05	2			9.55138e-05	1					7.88827e-05	3	0.000135402	1							4.86964e-05	1	0.000118622	1	9.58254e-05	2
go	GO:0046434	organophosphate catabolic process	0.00144407	4	0.000663282	8	0.00117897	11			0.000388911	4	0.00114584	6	0.00158277	8	0.0035468	11	0.000348245	5	0.000452813	2	0.00163167	7	0.00650624	12	0.000773859	2	9.54006e-05	2	0.000331621	2	0	0	6.21318e-05	2	0.00014292	4	0.000251005	6	0.00218839	5	0.000117348	4	0.00083926	7	3.00672e-05	1	8.97674e-05
go	GO:0046459	short-chain fatty acid metabolic process			0.000122961	2	3.15641e-05	1					0.000156729	1																													2.19863e-05	1
go	GO:0046496	nicotinamide nucleotide metabolic process	0.00150442	4	0.000663282	8	0.00123876	12	0	0	0.000388911	4	0.00114584	6	0.00158277	8	0.00373246	13	0.000348245	5	0.000452813	2	0.00163167	7	0.00650624	12	0.000773859	2	9.54006e-05	2	0.000331621	2	0	0	6.21318e-05	2	0.000120769	3	0.000294394	7	0.00218839	5	0.000117348	4	0.00124902	8	3.00672e-05	1	8.97674e-05
go	GO:0046500	S-adenosylmethionine metabolic process							9.36397e-05	1	7.62146e-05	1			0.000186248	3	0.000139069	1									0.000162968	2													0.000173867	2	5.06768e-05	1	0.000127546	1	8.58478e-05	1
go	GO:0046527	glucosyltransferase activity	0.000430196	2	6.50054e-05	2							0.000310332	1							0.00132874	2			7.2903e-05	1							0.000146962	2											0	0	0.000207438	2	0.000197141
go	GO:0046686	response to cadmium ion																			0.000110232	1			7.95788e-05	1							0.000167314	2
go	GO:0046872	metal ion binding	0.0352143	90	0.0344192	126	0.0253564	115	0.0552306	142	0.0611014	142	0.06245	202	0.0472718	136	0.069148	133	0.0161324	90	0.0202364	58	0.0126795	61	0.040324	105	0.0409303	124	0.0307004	105	0.0389468	57	0.0478176	140	0.0330528	126	0.0453243	159	0.0384083	156	0.0300942	101	0.0408222	185	0.0465455	139	0.0371421	131	0.0360467
go	GO:0046873	metal ion transmembrane transporter activity	4.75801e-05	1	0.000134218	4	0.000253169	4	0.000245865	4	6.95715e-05	1	4.77709e-05	2	0.000635528	3	8.60142e-05	1	5.67725e-05	3	0.00101697	7	0.00044231	4	0.000263822	2	3.74243e-05	1	2.46521e-05	2	0.000672245	2	0.00029527	4	0	0	0.000574666	2	5.60501e-05	2	4.50446e-05	1	0.000488244	10	0.000295037	4	0.0002404	4	3.45918e-05
go	GO:0046903	secretion			0.000155995	2	0.000148994	1	0.00101947	2			0.000471766	1	0.000389983	1							0.000565384	3			0.00014271	1			0.000165514	2	0.000852299	3	0.000435751	2	0.000296311	1					0.00041103	2	3.31907e-05	1	0.00023976	1
go	GO:0046906	tetrapyrrole binding			6.6255e-05	2			0.000238951	2							0.000402261	3					0.000189884	3	1.83436e-05	1	3.25512e-05	1			0.00038785	3							0.000191751	2			8.78178e-05	1	0.00067673	8
go	GO:0046912	acyltransferase activity, acyl groups converted into alkyl on transfer			1.76736e-05	1			0.000245182	2															0	0	4.06104e-05	2	3.13618e-05	1	0.000149454	1					8.94439e-05	2					6.26323e-06	1	0	0
go	GO:0046914	transition metal ion binding	0.030333	64	0.0323091	95	0.0235995	88	0.0515288	106	0.0569699	105	0.0587373	165	0.0449135	106	0.0657987	103	0.0145825	65	0.0173257	43	0.0104643	43	0.0380594	82	0.0365598	85	0.0289714	80	0.0364678	45	0.0451255	112	0.0304367	89	0.042346	117	0.0350564	109	0.0278898	73	0.0372459	133	0.0425868	103	0.0345458	97	0.0321298
go	GO:0046915	transition metal ion transmembrane transporter activity	4.75801e-05	1			0.000163943	2	2.40936e-05	1			2.5802e-05	1							0.000110232	1											0.000167314	2	0	0							4.17066e-05	1	0.000115107	2
go	GO:0046933	proton-transporting ATP synthase activity, rotational mechanism	0.00175239	5	0.000862722	6	0.001423	6	0.00108184	5	0.0012379	5	0.00154483	9	0.0014726	4	0.000647853	3	0.000205308	3	0.00452524	7	0.0016815	7	0.000843158	2	0.00130779	5	0.000739918	4	0.00631208	7	0.00120267	7	0.000819776	3	0.000676757	2	0.00126506	6	0.000905725	5	0.00107373	8	0.00160442	10	0.000914476	5	0.00108393
go	GO:0046961	proton-transporting ATPase activity, rotational mechanism	0.00175239	5	0.00108349	10	0.00125975	5	0.00119975	7	0.0012379	5	0.00154483	9	0.00157643	5	0.000647853	3	0.000215962	4	0.00452524	7	0.00178321	8	0.000843158	2	0.00130779	5	0.000750669	5	0.00631208	7	0.00177957	10	0.000819776	3	0.000676757	2	0.00126506	6	0.000905725	5	0.00109106	10	0.00139982	7	0.000792759	3	0.00108393
go	GO:0046962	sodium-transporting ATPase activity, rotational mechanism					3.37636e-05	1	8.31612e-05	2	6.95715e-05	1			0.000635528	3	8.60142e-05	1	4.56194e-05	2	3.52624e-05	1	0.000395922	3	0	0			2.46521e-05	2			9.33527e-05	1					5.60501e-05	2	4.50446e-05	1	4.01281e-05	2	0.000145153	1
go	GO:0046983	protein dimerization activity	0.000246748	1	0.000433158	1	0.000675763	1	0.00255798	1	0.000139118	2	0.000479807	1	8.86781e-05	1	0.000208093	3	0.000712414	1	0.00436061	2	0.000702266	3	0.000514121	2	0.00178621	6	0.000241902	1	0.000361382	1	0.000467145	1	0.000201749	1	0.000220546	3	0.00149875	4	0.000137512	1	0.000840586	1	0.000358708	2	0.000422261	1	0.000315953
go	GO:0046992	oxidoreductase activity, acting on X-H and Y-H to form an X-Y bond	0.00094967	7	0.00123191	5	4.40761e-05	1	0.000273805	2	0.000232882	1	0.000197279	2	0.000706323	6	0.000108733	2	4.00242e-05	2	0.00107157	7	0	0	0.00076716	6	0.0002409	4	0.000330548	4	0.00260003	6	0.000318952	3	0.000259873	3	0.000556984	5	0.000315951	3	0.000570126	4	9.75834e-05	2	0.000864664	7	0.000780473	6	0.00181522
go	GO:0047334	diphosphate-fructose-6-phosphate 1-phosphotransferase activity			0.000569802	7			0.000242153	1	6.4843e-05	1	3.60795e-05	2			0.00113961	6	0.00012977	2									0.000513479	4	0	0	2.02966e-05	1	2.07151e-05	1	3.81445e-05	1	9.35267e-05	2	0.000121244	3			2.4151e-05	1			0.000653817
go	GO:0047473	D-alanine [D-alanyl carrier protein] ligase activity	8.14036e-05	1	7.254e-05	1	9.11086e-05	1			0.000213293	1	1.48813e-05	1	7.83675e-05	1	7.84332e-05	1	0	0			0.000661525	4									0.00110744	1	8.68628e-05	1	5.09577e-05	1					6.89152e-05	2			7.2324e-05	1	0.00011631
go	GO:0047512	(S,S)-butanediol dehydrogenase activity	4.57428e-05	1	2.01979e-05	1					4.78235e-05	1					4.07213e-05	1															0.00024352	1	0	0	6.10421e-05	1							2.90334e-05	1
go	GO:0047553	2-oxoglutarate synthase activity	0.000224064	3	0.000875309	8	0.00146843	9	0.00316462	16			0.000181952	4	0.000334182	3	0.000209264	1	6.54643e-05	2	0.00166538	4	0.000348124	2	0	0	0.00141013	7	8.73243e-05	1	0.00373092	6	0.00172258	10	0.000381549	3	7.48972e-05	3	0.00149171	9	0.00468858	12	0.00148227	10	3.16644e-05	1	0.00032049	3	0.000330132
go	GO:0047577	4-hydroxybutyrate dehydrogenase activity	3.00064e-05	1									1.73113e-05	1																													4.7063e-05	1
go	GO:0047828	D-lyxose ketol-isomerase activity																															5.75664e-05	1
go	GO:0047868	dimethylmaleate hydratase activity			0.000131108	2																					0	0	0	0					0	0			0	0
go	GO:0048038	quinone binding					0.000132095	1			2.37468e-05	1	4.0148e-05	1	2.50912e-05	1			5.17646e-05	1																			0.000170548	2
go	GO:0048519	negative regulation of biological process	0.000834745	8	0.003103	14	0.00157123	8	0.00249183	8	0.00207305	10	0.000315137	6	0.0012793	12	0.00145766	12	0.000357514	11	0.0045026	10	0.00145351	8	0.00164739	10	0.000871749	9	0.000771667	9	0	0	0.00175264	13	0.00126277	10	0.000513029	7	0.00124109	9	0.000912914	11	0.000576551	7	0.0015519	15	0.00103324	9	0.000435703
go	GO:0048523	negative regulation of cellular process	0.000834745	8	0.003103	14	0.00157123	8	0.00249183	8	0.00207305	10	0.000315137	6	0.0012793	12	0.00145766	12	0.000357514	11	0.0045026	10	0.00145351	8	0.00164739	10	0.000871749	9	0.000771667	9	0	0	0.00175264	13	0.00126277	10	0.000513029	7	0.00124109	9	0.000912914	11	0.000576551	7	0.0015519	15	0.00103324	9	0.000435703
go	GO:0048583	regulation of response to stimulus			0.000156879	2	0.000148994	1	0.00101947	2							4.95853e-05	2					0.000179523	1	3.42665e-05	1	0.000493234	3	0.000101983	1			0.000836356	2	7.4953e-05	1							0.00041103	2			0.000385336	3
go	GO:0048646	anatomical structure formation involved in morphogenesis	0.0188087	31	0.00607494	25	0.00563937	20	0.00515691	15	0.0174564	32	0.00611917	22	0.00823144	19	0.0179916	45	0.0066359	33	0.023815	28	0.0157838	25	0.00782105	20	0.00933564	27	0.00967239	20	0.0050683	7	0.00682505	25	0.0151842	38	0.0145949	38	0.0094216	33	0.0123031	32	0.0093284	44	0.0126437	31	0.00697433	23	0.0124957
go	GO:0048856	anatomical structure development	0.000272562	2	0.000107813	1	0.00127402	5	0.000155134	1	0.000115474	2	0.000164228	2	3.80744e-05	1	0.000362702	1	7.91249e-05	2	0.000995163	1	0.000872068	4	0.0101784	13	5.44959e-05	1	0.000105402	1			0.000330899	2	3.38406e-05	1	2.37407e-05	1	0.000262932	4	0.000195182	2	0.000236048	2	0.000277934	1	8.73573e-05	1	0.000138373
go	GO:0050002	D-proline reductase activity																									2.4821e-05	1
go	GO:0050145	nucleoside monophosphate kinase activity	9.72911e-05	1	0.000332633	3	0.000125933	2			0.000544713	2	3.05085e-05	1	4.26345e-05	2	0.00011419	2											0.00014417	1	0.00107945	3			4.09673e-05	1	6.75097e-05	1	8.19829e-05	4	0.000217574	5			2.9083e-05	1	8.19213e-05	1
go	GO:0050180	phloretin hydrolase activity
go	GO:0050440	2-methylcitrate synthase activity			1.76736e-05	1			0.000245182	2																	1.2492e-05	1			0.000149454	1					5.95299e-05	1
go	GO:0050485	oxidoreductase activity, acting on X-H and Y-H to form an X-Y bond, with a disulfide as acceptor	0.00094967	7	0.00123191	5	4.40761e-05	1	0.000273805	2	0.000232882	1	0.000197279	2	0.000706323	6	0.000108733	2	4.00242e-05	2	0.00107157	7	0	0	0.00076716	6	0.0002409	4	0.000330548	4	0.00260003	6	0.000318952	3	0.000259873	3	0.000556984	5	0.000315951	3	0.000570126	4	9.75834e-05	2	0.000864664	7	0.000780473	6	0.00181522
go	GO:0050605	superoxide reductase activity	0.000208379	4	9.16348e-05	3	0	0			0.000100828	1	0	0	0.00154004	6	0.00059304	4			0.000351801	3	0.000329198	1			0.00083404	2			0.00117482	2	0.000110094	1	4.52389e-05	2	0.000227816	3	0.00251015	5	0.00151027	2	2.63695e-05	1	0.000142071	1	1.04033e-05	1
go	GO:0050667	homocysteine metabolic process			0.000653575	2	0.000977405	6	6.97097e-05	2					0.00018612	1											0.000224779	1	0.000538705	2	9.21347e-05	1	4.1914e-05	1			0.00141889	7			0.000279189	3	2.49143e-05	1					0.000428318
go	GO:0050789	regulation of biological process	0.00325962	29	0.00453064	39	0.00339684	33	0.00480994	25	0.00947031	40	0.0014455	20	0.00790211	41	0.00388982	39	0.00283864	41	0.0242645	37	0.00504486	32	0.0311155	30	0.00364956	27	0.00599918	33	0.000716578	5	0.00938819	41	0.00451502	43	0.00491433	45	0.00606763	48	0.00395748	40	0.0129624	50	0.00501914	45	0.00263712	31	0.00296493
go	GO:0050790	regulation of catalytic activity	0.000607557	6	0.0028609	9	0.00165433	7	0.00351131	10	0.00176595	8	0.000218841	3	0.000957686	8	0.000171546	1	0.000167227	4	0.00444352	9	0.00117176	7	0.00135854	7	0.000183789	3	0.000547082	6	0	0	0.00187244	9	0.000417478	4	0.000360043	4	0.00101852	5	0.000367188	5	0.000808732	7	0.00101686	7	0.00106314	7	0.000360198
go	GO:0050793	regulation of developmental process																					0.000295733	1															4.58641e-05	1	4.44273e-05	1
go	GO:0050794	regulation of cellular process	0.00316258	27	0.00451263	38	0.00339684	33	0.00475583	24	0.00947031	40	0.0014455	20	0.00790211	41	0.00384023	37	0.00283864	41	0.0242645	37	0.00504486	32	0.0311155	30	0.00315632	24	0.00589719	32	0.000716578	5	0.00938819	41	0.00444007	42	0.00491433	45	0.00606763	48	0.00395748	40	0.0129624	50	0.00501914	45	0.00249154	29	0.00296493
go	GO:0050829	defense response to Gram-negative bacterium	0.000246748	1	0.000433158	1	0.000675763	1	0.00255798	1	5.67988e-05	1	0.000479807	1	8.86781e-05	1	0.000165931	1	0.000712414	1	0.00426949	1	0.000484225	1	0.000479855	1	0.000183679	1	0.000241902	1	0.000361382	1	0.000467145	1	0.000201749	1	5.20635e-05	1	0.00108121	1	0.000137512	1	0.000840586	1	0.000343006	1	0.000422261	1	0.000176012
go	GO:0050830	defense response to Gram-positive bacterium	0.000246748	1	0.000433158	1	0.000675763	1	0.00255798	1	5.67988e-05	1	0.000479807	1	8.86781e-05	1	0.000165931	1	0.000712414	1	0.00426949	1	0.000484225	1	0.000479855	1	0.000183679	1	0.000241902	1	0.000361382	1	0.000467145	1	0.000201749	1	5.20635e-05	1	0.00108121	1	0.000137512	1	0.000840586	1	0.000343006	1	0.000422261	1	0.000176012
go	GO:0050832	defense response to fungus	0.000449915	2	0.00067984	3	0.000986463	3	0.00373259	4	0.000129887	2	0.000603887	2	0.000126752	2	0.000528632	2	0.000739774	2	0.00526466	2	0.000824061	3	0.000479855	1	0.000238175	2	0.000347304	2	0.000361382	1	0.00158752	4	0.00023559	2	7.58042e-05	2	0.00114671	2	0.000215483	2	0.00133913	4	0.00062094	2	0.000749378	3	0.000314385
go	GO:0050896	response to stimulus	0.00395367	13	0.000822171	5	0.0010152	4	0.00395886	8	0.00253844	9	0.000666004	4	0.00695516	9	0.000910068	6	0.000791539	3	0.005947	7	0.00090797	5	0.0105346	15	0.000272719	3	0.000347304	2	0.000787347	2	0.00182368	8	0.000258073	3	0.00028014	6	0.00175359	9	0.000572922	6	0.00176985	9	0.00123822	7	0.000987052	5	0.000361403
go	GO:0050997	quaternary ammonium group binding					0.000137961	1																					3.80449e-05	1			6.34312e-05	1									2.53907e-05	1					0.000220623
go	GO:0051119	sugar transmembrane transporter activity			1.88642e-05	1					5.04922e-05	1	7.47672e-05	1	0.000153443	4	0.000201286	1	6.30867e-05	1	4.37703e-05	1	0	0			9.47041e-05	1							0.000290607	3	6.16399e-05	1	0.000191038	4	4.29268e-05	1					0.000129782	1	4.92293e-05
go	GO:0051128	regulation of cellular component organization	6.72998e-05	1	7.57708e-05	2	0.000257779	3			0.00032901	3	6.67438e-05	2	6.58329e-05	1	0.000507004	3	0.000218622	2			5.70819e-05	2	0.000351359	4	0.000230805	1	0.000225897	3			4.17513e-05	1	0.00027698	6	0.00078713	7	0	0	0.000929879	4	4.85223e-05	1	0.000459431	4	2.35868e-05	1	0.000146947
go	GO:0051179	localization	0.0130277	33	0.00742069	50	0.0103623	51	0.0112945	45	0.0160092	32	0.011125	58	0.0126729	32	0.0112484	44	0.00677112	33	0.0112057	34	0.00741556	36	0.00959051	43	0.00420039	29	0.00778174	41	0.0328023	41	0.0115353	39	0.00809241	39	0.00870319	51	0.00527872	22	0.00687965	30	0.00843915	52	0.0132752	49	0.00927575	39	0.0126299
go	GO:0051192	prosthetic group binding	0.0133221	39	0.0189299	74	0.0201494	54	0.0156613	56	0.0156974	35	0.00967484	42	0.0194291	52	0.0150797	45	0.00841073	38	0.019232	39	0.0140191	45	0.015097	32	0.0103599	54	0.0101367	44	0.0198868	34	0.0169256	56	0.0185631	48	0.0119676	56	0.00997046	40	0.0185333	57	0.0151	83	0.0105338	44	0.01793	60	0.0149925
go	GO:0051234	establishment of localization	0.0130277	33	0.00742069	50	0.0103623	51	0.0112945	45	0.0160092	32	0.011125	58	0.0126729	32	0.0112484	44	0.00677112	33	0.0112057	34	0.00741556	36	0.00959051	43	0.00420039	29	0.00778174	41	0.0328023	41	0.0115353	39	0.00809241	39	0.00870319	51	0.00527872	22	0.00687965	30	0.00843915	52	0.0132752	49	0.00927575	39	0.0126299
go	GO:0051246	regulation of protein metabolic process	0.000780023	7	0.00303526	10	0.00190623	11	0.00408066	15	0.00651377	16	0.000218841	3	0.00118135	10	0.00040385	3	0.00113846	8	0.00475823	10	0.00117176	7	0.00202304	11	0.000481368	5	0.000547082	6	0.000274815	2	0.00187244	9	0.000417478	4	0.000482808	6	0.00110735	6	0.000617978	7	0.000808732	7	0.00110605	8	0.00106314	7	0.000788474
go	GO:0051248	negative regulation of protein metabolic process	0.000607557	6	0.00272204	8	0.00150533	6	0.00249183	8	0.00176595	8	0.000218841	3	0.000957686	8	0.000171546	1	0.000167227	4	0.00444352	9	0.00099224	6	0.00135854	7	0.000183789	3	0.000547082	6	0	0	0.00103608	7	0.000417478	4	0.000360043	4	0.00101852	5	0.000367188	5	0.000397702	5	0.00101686	7	0.000823377	6	0.000360198
go	GO:0051252	regulation of RNA metabolic process	0.00201867	16	0.0011595	21	0.00144669	20	0.00169464	11	0.00227805	18	0.00106361	12	0.00626769	25	0.00156476	17	0.00129127	24	0.0194472	26	0.00283365	18	0.0289072	17	0.00175619	12	0.00489963	20	0.000441762	3	0.00754692	26	0.00240784	25	0.00343718	28	0.00473459	37	0.00179112	23	0.0121798	40	0.00272651	21	0.00137094	17	0.00190699
go	GO:0051287	NAD binding	0.000225608	4	0.00448178	6	0.0005321	5	0.000732766	1	0.00108723	9	4.0148e-05	1	9.0625e-05	2	0.000292532	4	0.000105019	2	0.0013275	3	0.000170959	2	0.000589092	2	0.000732327	4	0.00448421	1	0.000365071	3	0.000234061	1	0.000105691	1	0.00267149	5	0.000367698	3	0.000821042	7	0.00163737	1	0.00473742	5	0.000773786	5	0.0011466
go	GO:0051301	cell division	6.72998e-05	1	7.57708e-05	2	0.000188712	3			0.00032901	3	6.67438e-05	2	6.58329e-05	1	0.000507004	3	0.000218622	2			5.70819e-05	2	6.81193e-05	1	0.000230805	1	0.000225897	3			4.17513e-05	1	0.00027698	6	0.00078713	7	0	0	0.000929879	4	4.85223e-05	1	0.000459431	4	2.35868e-05	1	0.000146947
go	GO:0051336	regulation of hydrolase activity	0.000607557	6	0.00272204	8	0.00150533	6	0.00249183	8	0.00176595	8	0.000218841	3	0.000957686	8	0.000171546	1	0.000167227	4	0.00444352	9	0.00099224	6	0.00135854	7	0.000183789	3	0.000547082	6	0	0	0.00103608	7	0.000417478	4	0.000360043	4	0.00101852	5	0.000367188	5	0.000397702	5	0.00101686	7	0.000823377	6	0.000360198
go	GO:0051346	negative regulation of hydrolase activity	0.000607557	6	0.00272204	8	0.00150533	6	0.00249183	8	0.00176595	8	0.000218841	3	0.000957686	8	0.000171546	1	0.000167227	4	0.00444352	9	0.00099224	6	0.00135854	7	0.000183789	3	0.000547082	6	0	0	0.00103608	7	0.000417478	4	0.000360043	4	0.00101852	5	0.000367188	5	0.000397702	5	0.00101686	7	0.000823377	6	0.000360198
go	GO:0051536	iron-sulfur cluster binding	0.000385332	3	0.000122449	6	0.000109738	3	0.00147134	7	6.19093e-05	2	0.000159825	4	2.50912e-05	1	9.85022e-05	1	5.17646e-05	1	0.000188805	4	2.15498e-05	1	0.00012023	3	9.14414e-05	2			0.000620633	2	0.000138954	3	0.00116684	4	2.89157e-05	1	0.000341916	5	0.000229169	4	1.52586e-05	1	0.000304434	4			0.000412116
go	GO:0051540	metal cluster binding	0.000385332	3	0.000122449	6	0.000109738	3	0.00147134	7	6.19093e-05	2	0.000159825	4	2.50912e-05	1	9.85022e-05	1	5.17646e-05	1	0.000188805	4	2.15498e-05	1	0.00012023	3	9.14414e-05	2			0.000620633	2	0.000138954	3	0.00116684	4	2.89157e-05	1	0.000341916	5	0.000229169	4	1.52586e-05	1	0.000304434	4			0.000412116
go	GO:0051641	cellular localization	0.000237078	3	0.00027457	5	0.000223299	2	0.00105589	3	0.000450642	2	0.000575422	4	0.000695135	3	0.000539738	5			4.15405e-05	1	0.000836681	4	0.000140243	3	0.00014271	1	0.000193286	2	0.000591479	3	0.000911702	4	0.000630584	6	0.000442935	5	0	0	0.000240228	3	0.000622232	7	0.000300173	3	0.000382157	5	0
go	GO:0051704	obsolete multi-organism process	0.000316142	2	0.000572027	2	0.000824757	2	0.00357746	3	9.91839e-05	2	0.000479807	1	8.86781e-05	1	0.000165931	1	0.000712414	1	0.00426949	1	0.000713243	3	0.000479855	1	0.000183679	1	0.000241902	1	0.000361382	1	0.00135038	4	0.000201749	1	5.20635e-05	1	0.00110808	2	0.000254723	2	0.00140015	4	0.000343006	1	0.000662021	2	0.000176012
go	GO:0051707	response to other organism	0.000449915	2	0.00067984	3	0.000986463	3	0.00373259	4	0.000129887	2	0.000603887	2	0.000126752	2	0.000528632	2	0.000739774	2	0.00526466	2	0.000858474	4	0.000559434	2	0.000238175	2	0.000347304	2	0.000361382	1	0.00158752	4	0.00023559	2	7.58042e-05	2	0.00114671	2	0.000215483	2	0.00133913	4	0.00062094	2	0.000749378	3	0.000314385
go	GO:0051716	cellular response to stimulus	6.93947e-05	1	0.000138869	1	0.000148994	1	0.00105589	3	0.000493027	3					0.000272242	3			4.15405e-05	1	0.000229019	2	0.000317506	4	3.45444e-05	1					0.000883236	3			0.000171007	3	2.6877e-05	1	0.000357439	4	0.000639227	5	0.000526812	4	0.000477435	3	4.70181e-05
go	GO:0051726	regulation of cell cycle	6.72998e-05	1	7.57708e-05	2	0.000150646	2			0.00032901	3	6.67438e-05	2	6.58329e-05	1	0.000507004	3	0.000218622	2			5.70819e-05	2	6.81193e-05	1	0.000230805	1	0.000225897	3			4.17513e-05	1	0.00027698	6	0.00078713	7	0	0	0.000929879	4	4.85223e-05	1	0.000459431	4	2.35868e-05	1	0.000146947
go	GO:0051912	CoB--CoM heterodisulfide reductase activity																															0.000968433	5	0	0							0.000204447	1
go	GO:0051920	peroxiredoxin activity			0.000170473	2			5.96179e-05	2							0	0	0.00016805	1	0.000331065	1											8.97051e-05	1	0.000455212	1			0.000557341	4	2.65272e-05	1			0.000215221	2			8.81144e-05
go	GO:0052547	regulation of peptidase activity	0.000607557	6	0.00272204	8	0.00150533	6	0.00249183	8	0.00176595	8	0.000218841	3	0.000957686	8	0.000171546	1	0.000167227	4	0.00444352	9	0.00099224	6	0.00135854	7	0.000183789	3	0.000547082	6	0	0	0.00103608	7	0.000417478	4	0.000360043	4	0.00101852	5	0.000367188	5	0.000397702	5	0.00101686	7	0.000823377	6	0.000360198
go	GO:0052588	diacetyl reductase ((S)-acetoin forming) (NAD+) activity	4.57428e-05	1	2.01979e-05	1					4.78235e-05	1					4.07213e-05	1															0.00024352	1	0	0	6.10421e-05	1							2.90334e-05	1
go	GO:0055085	transmembrane transport	0.0109652	27	0.00682862	40	0.00809767	40	0.0102145	41	0.0110628	28	0.00936883	47	0.0119778	29	0.0104291	37	0.00668385	30	0.0105178	28	0.00575493	25	0.00918644	38	0.00374898	23	0.00753165	37	0.0306025	35	0.0106058	34	0.00735613	32	0.00657286	40	0.00454878	17	0.00654714	25	0.00425074	35	0.0122957	38	0.0086532	30	0.0124876
go	GO:0055086	nucleobase-containing small molecule metabolic process	0.00325682	9	0.00207836	20	0.00295514	28	0.00129824	8	0.00175937	12	0.00296278	19	0.00566707	23	0.00501379	21	0.0013889	13	0.00523766	12	0.00378324	20	0.00757707	15	0.00362739	19	0.00127049	10	0.00793801	17	0.00171877	16	0.00103997	7	0.00117957	18	0.00258371	23	0.00431319	23	0.00140126	17	0.00356536	25	0.00102203	8	0.0042673
go	GO:0060089	molecular transducer activity			5.04295e-05	1							2.19689e-05	1	0.0012997	3	2.22702e-05	1			0.000375195	3	0.00035213	2	7.43579e-05	1	4.79669e-05	1	0.00102325	2	0.000202466	1	0.000184532	1	3.96932e-05	1	3.33292e-05	1			0.000205262	1	0	0	0.00017902	1			0.000355112
go	GO:0060205	cytoplasmic vesicle lumen	0.000246748	1	0.000572027	2	0.000824757	2	0.00357746	3	5.67988e-05	1	0.000479807	1	8.86781e-05	1	0.000165931	1	0.000712414	1	0.00426949	1	0.000663748	2	0.000479855	1	0.000183679	1	0.000241902	1	0.000361382	1	0.0013035	3	0.000201749	1	5.20635e-05	1	0.00108121	1	0.000137512	1	0.00125162	3	0.000343006	1	0.000662021	2	0.000176012
go	GO:0060255	regulation of macromolecule metabolic process	0.00302588	25	0.00443686	36	0.00324619	31	0.00475583	24	0.00909892	36	0.00135678	17	0.00777065	39	0.00325472	31	0.00262001	39	0.0242054	36	0.00428716	26	0.0309016	27	0.00292552	23	0.00567129	29	0.000716578	5	0.00929955	39	0.00367061	35	0.00403964	36	0.00596912	46	0.00291039	35	0.0127563	47	0.00433157	36	0.00240418	26	0.00277096
go	GO:0061134	peptidase regulator activity	0.000607557	6	0.00272204	8	0.00150533	6	0.00249183	8	0.00176595	8	0.000218841	3	0.000957686	8	0.000171546	1	0.000229293	5	0.00444352	9	0.00099224	6	0.00135854	7	0.000283863	5	0.000547082	6	0.000272871	2	0.00103608	7	0.000417478	4	0.000360043	4	0.00101852	5	0.000422267	6	0.000397702	5	0.00101686	7	0.000823377	6	0.000360198
go	GO:0061135	endopeptidase regulator activity	0.000607557	6	0.00272204	8	0.00150533	6	0.00249183	8	0.00176595	8	0.000218841	3	0.000957686	8	0.000171546	1	0.000229293	5	0.00444352	9	0.00099224	6	0.00135854	7	0.000283863	5	0.000547082	6	0.000272871	2	0.00103608	7	0.000417478	4	0.000360043	4	0.00101852	5	0.000422267	6	0.000397702	5	0.00101686	7	0.000823377	6	0.000360198
go	GO:0061783	peptidoglycan muralytic activity																			0.000433753	1
go	GO:0061844	antimicrobial humoral immune response mediated by antimicrobial peptide	0.000246748	1	0.000572027	2	0.000824757	2	0.00357746	3	5.67988e-05	1	0.000479807	1	8.86781e-05	1	0.000165931	1	0.000712414	1	0.00426949	1	0.000663748	2	0.000479855	1	0.000183679	1	0.000241902	1	0.000361382	1	0.0013035	3	0.000201749	1	5.20635e-05	1	0.00108121	1	0.000137512	1	0.00125162	3	0.000343006	1	0.000662021	2	0.000176012
go	GO:0065007	biological regulation	0.00350636	30	0.0049638	40	0.0040726	34	0.00754517	27	0.00952711	41	0.0019253	21	0.00799079	42	0.00405575	40	0.00355105	42	0.028534	38	0.00552909	33	0.0315953	31	0.00383324	28	0.00624108	34	0.00107796	6	0.00985533	42	0.00471677	44	0.00496639	46	0.00714883	49	0.004095	41	0.0138212	53	0.0059205	51	0.00307626	33	0.00314094
go	GO:0065008	regulation of biological quality	0.000246748	1	0.000433158	1	0.000675763	1	0.00255798	1	5.67988e-05	1	0.000479807	1	8.86781e-05	1	0.000165931	1	0.000712414	1	0.00426949	1	0.000484225	1	0.000479855	1	0.000183679	1	0.000241902	1	0.000361382	1	0.000467145	1	0.000201749	1	5.20635e-05	1	0.00108121	1	0.000137512	1	0.000840586	1	0.000934553	7	0.000422261	1	0.000176012
go	GO:0065009	regulation of molecular function	0.000607557	6	0.0028609	9	0.00165433	7	0.00368856	11	0.00176595	8	0.000218841	3	0.000957686	8	0.000171546	1	0.000167227	4	0.00444352	9	0.00117176	7	0.00135854	7	0.000183789	3	0.000547082	6	0	0	0.00187244	9	0.000417478	4	0.000360043	4	0.00101852	5	0.000367188	5	0.000826903	9	0.00101686	7	0.00108002	8	0.000360198
go	GO:0070003	threonine-type peptidase activity
go	GO:0070013	intracellular organelle lumen	0.000246748	1	0.000572027	2	0.000824757	2	0.00357746	3	5.67988e-05	1	0.000519955	2	8.86781e-05	1	0.000165931	1	0.000764178	2	0.00426949	1	0.000765432	3	0.000763095	4	0.000183679	1	0.000241902	1	0.000361382	1	0.0013035	3	0.000201749	1	5.20635e-05	1	0.00125175	3	0.000137512	1	0.00133943	4	0.000869818	5	0.000662021	2	0.000176012
go	GO:0070279	vitamin B6 binding	2.98057e-05	1	0.000737338	4	0.00192247	11	6.97097e-05	2			7.10677e-05	1	0.000656606	2	0.00109377	3			0.000396614	2	5.93304e-05	1	0.00101582	3	0.000224779	1	0.000575843	3	9.21347e-05	1	0.000248625	4	0	0	0.00144189	8	0.000396017	4	0.000464485	6	2.49143e-05	1	0.00026802	3			0.000502195
go	GO:0070548	L-glutamine aminotransferase activity																																			0.000132478	1
go	GO:0070567	cytidylyltransferase activity							4.38229e-05	1			7.17331e-06	1	9.13379e-05	1			0	0															5.15393e-05	1			0.000130233	4	0	0
go	GO:0070727	cellular macromolecule localization	0.000237078	3	0.00027457	5	0.000223299	2	0.00105589	3	0.000450642	2	0.000575422	4	0.000695135	3	0.000539738	5			4.15405e-05	1	0.000836681	4	0.000140243	3	0.00014271	1	0.000193286	2	0.000591479	3	0.000911702	4	0.000630584	6	0.000442935	5	0	0	0.000240228	3	0.000622232	7	0.000300173	3	0.000382157	5	0
go	GO:0071692	protein localization to extracellular region			0.000155995	2	0.000148994	1	0.00101947	2			0.000471766	1	0.000389983	1							0.000565384	3			0.00014271	1			0.000165514	2	0.000852299	3	0.000435751	2	0.000296311	1					0.00041103	2			0.00023976	1
go	GO:0071704	obsolete organic substance metabolic process			9.04107e-05	2			0.00037105	2			0.000340399	3	0.000949939	1	0.000523635	3			0.000711612	4	0.000217129	1	0.00028324	3	5.16353e-05	2	3.9022e-05	1	0.000338507	3	0.000478165	5					0.000296295	4	3.40753e-05	1	0.00053288	4	0.00107336	5	0.000133628	2	0
go	GO:0071705	nitrogen compound transport	0.000490971	5	0.00027457	5	0.000476974	4	0.00105589	3	0.000472184	3	0.000575422	4	0.00045154	2	0.000539738	5			4.15405e-05	1	0.000862336	5	0.000105977	2	0.00014271	1	0.00021724	3	0.000591479	3	0.000911702	4	0.000630584	6	0.000590939	8	0	0	0.000240228	3	0.000819293	9	0.000300173	3	0.000382157	5	0
go	GO:0071840	cellular component organization or biogenesis	0.000485016	6	0.000229528	8	0.000354337	7	0.000564641	7	3.81625e-05	1	0.000579927	8			0.000528231	5	0.00043297	10	0.000402355	4	8.28914e-05	2	0.000103374	3	8.67536e-05	1	2.29876e-05	1	0.000232152	2	0.000250515	7	0.000285299	5	0.000113036	3	0.000515752	7	0.000354834	5	0.00073572	16	0.00163289	10	0.00137813	7	0.00072783
go	GO:0071941	nitrogen cycle metabolic process	0.00111354	3	0.0017923	8	0.00335711	8	0.00326068	6	0.000631957	4	0.00229506	8	0.000575193	3	0.000950752	3	0.00114766	5	0.0055315	8	0.00144425	5	0.000694707	5	0.00225383	6	0.000556814	2	0.000814773	2	0.000583098	3	0.00165171	8	0.000821224	4	0.000884111	3	0.000269967	2	0.000807737	5	0.000540757	4	0.00124246	5	0.0010429
go	GO:0072330	monocarboxylic acid biosynthetic process	0.00437137	4	0.000164097	3	0.00110076	9	0.00366163	12	4.87794e-05	1	0.00389252	12	0.00428838	4	0.000963524	3	0.00030829	3	0.00244997	6	0.00066168	5	0.00519911	7	0.00261719	9	0.000534328	4	0.0015815	4	0.00315767	7	0.00397006	4	0.00358146	8	0.000863531	7	0.000220355	2	0.00343032	15	0.00117236	4	0.000477728	6	0.00139811
go	GO:0072521	purine-containing compound metabolic process	0.00325682	9	0.00190685	17	0.0029333	27	0.00129824	8	0.00173152	11	0.00296278	19	0.00561737	20	0.00498181	20	0.00137071	12	0.00523766	12	0.00378324	20	0.00757707	15	0.00357476	18	0.00127049	10	0.00761331	14	0.00161359	14	0.00103997	7	0.00102411	14	0.00253192	20	0.00411748	21	0.00140126	17	0.00352034	24	0.000940106	7	0.00367834
go	GO:0072522	purine-containing compound biosynthetic process	0.00182908	6	0.00124356	9	0.00172477	16	0.00108184	5	0.00134261	7	0.00201918	14	0.00231801	9	0.00147813	8	0.00102246	7	0.00478485	10	0.00215158	13	0.00107082	3	0.0027602	15	0.00117508	8	0.00728169	12	0.00159428	13	0.000977838	5	0.00088119	10	0.00228091	14	0.00174234	14	0.00119038	12	0.00227132	16	0.000910039	6	0.00358857
go	GO:0072523	purine-containing compound catabolic process	0.00142773	3	0.000663282	8	0.00113777	10	0.000127808	1	0.000388911	4	0.00114584	6	0.00158277	8	0.0035468	11	0.000348245	5	0.000452813	2	0.00163167	7	0.00650624	12	0.000773859	2	9.54006e-05	2	0.000331621	2	0	0	6.21318e-05	2	0.00014292	4	0.000251005	6	0.00218839	5	0.000117348	4	0.00083926	7	3.00672e-05	1	8.97674e-05
go	GO:0072524	pyridine-containing compound metabolic process	0.00150442	4	0.000663282	8	0.00123876	12	0	0	0.000388911	4	0.00114584	6	0.00158277	8	0.00373246	13	0.000348245	5	0.000452813	2	0.00163167	7	0.00650624	12	0.000773859	2	9.54006e-05	2	0.000331621	2	0	0	6.21318e-05	2	0.000120769	3	0.000294394	7	0.00218839	5	0.000117348	4	0.00124902	8	3.00672e-05	1	8.97674e-05
go	GO:0072526	pyridine-containing compound catabolic process	0.00142773	3	0.000663282	8	0.00113777	10			0.000388911	4	0.00114584	6	0.00158277	8	0.0035468	11	0.000348245	5	0.000452813	2	0.00163167	7	0.00650624	12	0.000773859	2	9.54006e-05	2	0.000331621	2	0	0	6.21318e-05	2	0.000120769	3	0.000251005	6	0.00218839	5	0.000117348	4	0.00083926	7	3.00672e-05	1	8.97674e-05
go	GO:0080090	regulation of primary metabolic process	0.00302588	25	0.00443686	36	0.00324619	31	0.00475583	24	0.00909892	36	0.00135678	17	0.00777065	39	0.00325472	31	0.00262001	39	0.0242054	36	0.00428716	26	0.0309016	27	0.00292552	23	0.00567129	29	0.000716578	5	0.00929955	39	0.00361379	34	0.00403964	36	0.00596912	46	0.00291039	35	0.0127654	48	0.00433157	36	0.00240418	26	0.00277096
go	GO:0090304	nucleic acid metabolic process	0.00378917	30	0.00380343	42	0.00298992	37	0.00321602	28	0.00496735	28	0.00319247	33	0.00349526	27	0.00510598	36	0.00235402	35	0.0208583	33	0.00396222	27	0.00186783	18	0.00485638	37	0.00354805	23	0.00546018	10	0.00407872	34	0.00424129	40	0.00632108	43	0.00310587	36	0.00833788	44	0.014097	73	0.00572395	34	0.00294507	39	0.00382098
go	GO:0090407	organophosphate biosynthetic process	0.00182908	6	0.00137705	10	0.0016702	14	0.00135817	7	0.00134261	7	0.00201918	14	0.00188649	9	0.00147813	8	0.00103509	8	0.00526976	12	0.00243244	14	0.00107082	3	0.00277546	15	0.00117508	8	0.00751475	14	0.00165679	14	0.000977838	5	0.00091949	11	0.00231114	16	0.00156835	12	0.00119038	12	0.00227132	16	0.000910039	6	0.00420974
go	GO:0090559	regulation of membrane permeability	0.000246748	1	0.000433158	1	0.000675763	1	0.00255798	1	5.67988e-05	1	0.000479807	1	8.86781e-05	1	0.000165931	1	0.000712414	1	0.00426949	1	0.000484225	1	0.000479855	1	0.000183679	1	0.000241902	1	0.000361382	1	0.000467145	1	0.000201749	1	5.20635e-05	1	0.00108121	1	0.000137512	1	0.000840586	1	0.000343006	1	0.000422261	1	0.000176012
go	GO:0090563	protein-phosphocysteine-sugar phosphotransferase activity	0.000414489	4	0.000362568	7	0.000423163	6	0.000437408	4	2.26796e-05	1	0.00150261	13	0.0023536	10	0.00145136	8	0.00227719	9	0.00255611	9	0.000967384	4	0.00230221	13	0.000238124	4	0.00102032	15	0.000804075	3	9.45543e-05	4	0.000104676	3	0.00200126	14	0.000213028	3	4.74731e-05	1	0.000902474	11	0.00289953	13	0.000286742	6	0.00240853
go	GO:0090566	protein-phosphocysteine-N,N'-diacetylchitobiose phosphotransferase system transporter activity			3.59582e-05	1			0.00036146	3			0.00116044	7	0.00197832	6	0.00130503	5	0.00195325	5	0.00192346	5	0.000766584	3	0.00126545	5			0.000641769	6	0.000503356	1					0.00145033	8					0.000409123	4	0.00261111	10			0.0019152
go	GO:0090585	protein-phosphocysteine-L-ascorbate-phosphotransferase system transporter activity	0.000414489	4	0.000307745	5	0.000272544	4	7.59476e-05	1	2.26796e-05	1	0.000295919	5	0.000375278	4	0.000146324	3	0.000323934	4	0.000632645	4	0.0002008	1	0.00103676	8	0.000238124	4	0.000353765	8	0.000300719	2	9.45543e-05	4	0.000104676	3	0.000324199	5	0.000213028	3	4.74731e-05	1	0.00049335	7	0.000288418	3	0.000286742	6	0.000493328
go	GO:0090586	protein-phosphocysteine-N-acetylglucosamine phosphotransferase system transporter activity																											2.47903e-05	1
go	GO:0097367	carbohydrate derivative binding	0.106487	220	0.0609312	234	0.0391817	219	0.0623507	209	0.0885467	199	0.0525158	198	0.0888068	196	0.108523	231	0.071237	197	0.0788707	185	0.0805365	204	0.0552881	150	0.0689841	197	0.0732818	198	0.114962	180	0.0675552	225	0.0742288	188	0.0784943	256	0.0638715	216	0.0824249	223	0.0376495	173	0.076692	211	0.0666321	209	0.0974883
go	GO:0097708	intracellular vesicle	0.000246748	1	0.000572027	2	0.000824757	2	0.00357746	3	5.67988e-05	1	0.000479807	1	8.86781e-05	1	0.000165931	1	0.000712414	1	0.00426949	1	0.000663748	2	0.000479855	1	0.000183679	1	0.000241902	1	0.000361382	1	0.0013035	3	0.000201749	1	5.20635e-05	1	0.00108121	1	0.000137512	1	0.00125162	3	0.000376197	2	0.000662021	2	0.000176012
go	GO:0097747	RNA polymerase activity	0.00292534	22	0.00316238	31	0.00327164	39	0.00311439	23	0.00462898	25	0.00326791	30	0.00333139	22	0.0038457	25	0.001109	14	0.00265717	14	0.00358858	23	0.00172786	16	0.00466217	29	0.00335892	19	0.00104505	6	0.00272764	21	0.00320603	31	0.00586533	39	0.00254555	26	0.00723637	33	0.00370235	42	0.00434855	23	0.00223936	28	0.0032823
go	GO:0098542	defense response to other organism	0.000246748	1	0.000572027	2	0.000824757	2	0.00357746	3	5.67988e-05	1	0.000479807	1	8.86781e-05	1	0.000165931	1	0.000712414	1	0.00426949	1	0.000663748	2	0.000479855	1	0.000183679	1	0.000241902	1	0.000361382	1	0.0013035	3	0.000201749	1	5.20635e-05	1	0.00108121	1	0.000137512	1	0.00125162	3	0.000343006	1	0.000662021	2	0.000176012
go	GO:0098655	monoatomic cation transmembrane transport	0.00249261	9	0.00424523	14	0.00559054	17	0.00573278	15	0.001376	7	0.00114939	10	0.00131061	5	0.00260439	8	0.000271254	3	0.00545596	13	0.00288088	9	0.00127566	5	0.00264891	12	0.00176563	10	0.0249149	22	0.00173075	11	0.00126666	10	0.00168306	10	0.00127345	4	0.00314901	9	0.00154253	13	0.00363926	12	0.00107583	5	0.00657131
go	GO:0098657	import into cell	0.00818981	15	0.00194584	21	0.00211162	20	0.00420806	22	0.00968682	21	0.00821944	37	0.0106671	24	0.00752181	26	0.00637657	26	0.00456658	12	0.00280885	14	0.00791078	33	0.00110007	11	0.00576602	27	0.00517792	10	0.00824891	19	0.00608947	22	0.0048898	30	0.00327533	13	0.00339813	16	0.00265004	21	0.00867653	26	0.00752583	24	0.00591633
go	GO:0098660	inorganic ion transmembrane transport	0.00249261	9	0.00424523	14	0.00559054	17	0.00573278	15	0.001376	7	0.00114939	10	0.00131061	5	0.00260439	8	0.000271254	3	0.00545596	13	0.00288088	9	0.00127566	5	0.00264891	12	0.00176563	10	0.0249149	22	0.00173075	11	0.00126666	10	0.00168306	10	0.00127345	4	0.00314901	9	0.00154253	13	0.00363926	12	0.00107583	5	0.00657131
go	GO:0098662	inorganic cation transmembrane transport	0.00249261	9	0.00424523	14	0.00559054	17	0.00573278	15	0.001376	7	0.00114939	10	0.00131061	5	0.00260439	8	0.000271254	3	0.00545596	13	0.00288088	9	0.00127566	5	0.00264891	12	0.00176563	10	0.0249149	22	0.00173075	11	0.00126666	10	0.00168306	10	0.00127345	4	0.00314901	9	0.00154253	13	0.00363926	12	0.00107583	5	0.00657131
go	GO:0098704	carbohydrate import across plasma membrane	0.00818981	15	0.00194584	21	0.00211162	20	0.00420806	22	0.00968682	21	0.00821944	37	0.0106671	24	0.00752181	26	0.00637657	26	0.00456658	12	0.00280885	14	0.00791078	33	0.00110007	11	0.00576602	27	0.00517792	10	0.00824891	19	0.00608947	22	0.0048898	30	0.00327533	13	0.00339813	16	0.00265004	21	0.00864334	25	0.00752583	24	0.00591633
go	GO:0098739	import across plasma membrane	0.00818981	15	0.00194584	21	0.00211162	20	0.00420806	22	0.00968682	21	0.00821944	37	0.0106671	24	0.00752181	26	0.00637657	26	0.00456658	12	0.00280885	14	0.00791078	33	0.00110007	11	0.00576602	27	0.00517792	10	0.00824891	19	0.00608947	22	0.0048898	30	0.00327533	13	0.00339813	16	0.00265004	21	0.00864334	25	0.00752583	24	0.00591633
go	GO:0098772	molecular function regulator activity	0.000930041	7	0.00370492	15	0.00227975	13	0.00249183	8	0.00176595	8	0.000302246	4	0.00112304	9	0.000683696	6	0.000229293	5	0.00444352	9	0.00103377	8	0.00278033	13	0.000987291	10	0.000649065	7	0.000619331	4	0.00105663	8	0.000583495	7	0.000869241	8	0.00101852	5	0.000591445	7	0.000406766	6	0.00110372	9	0.000968953	8	0.00124577
go	GO:0098796	membrane protein complex	0.00244503	8	0.004654	14	0.0060849	23	0.00570837	15	0.00151029	9	0.00228238	15	0.00131061	5	0.00272037	9	0.000323019	4	0.00630641	18	0.00372855	16	0.00127566	5	0.00273011	13	0.00176563	10	0.0269537	29	0.00179393	12	0.00131211	11	0.00173668	10	0.00188796	11	0.00314901	9	0.0045035	15	0.00434139	18	0.00110401	6	0.00665026
go	GO:0098798	mitochondrial protein-containing complex	0.292977	850	0.335807	1288	0.303813	1178	0.298203	1119	0.33917	844	0.334347	1336	0.313503	916	0.290679	875	0.372664	1195	0.212485	693	0.345832	1010	0.29931	909	0.322964	1066	0.289657	1025	0.238184	437	0.296477	1002	0.356488	1174	0.372924	1386	0.255859	1116	0.31933	1078	0.288027	1439	0.316784	1060	0.334838	1211	0.350612
go	GO:0098803	respiratory chain complex	0.00175239	5	0.000836136	5	0.00148651	9	0.000998683	3	0.00116833	4	0.00158498	10	0.000940905	2	0.000677811	3	0.000222107	3	0.00475078	8	0.00138727	5	0.000843158	2	0.00124954	4	0.000726017	3	0.00631208	7	0.00132514	9	0.000819776	3	0.000676757	2	0.00159559	8	0.000624258	2	0.000962575	7	0.00146982	8	0.000716411	3	0.00108393
go	GO:0099503	secretory vesicle	0.000246748	1	0.000572027	2	0.000824757	2	0.00357746	3	5.67988e-05	1	0.000479807	1	8.86781e-05	1	0.000165931	1	0.000712414	1	0.00426949	1	0.000663748	2	0.000479855	1	0.000183679	1	0.000241902	1	0.000361382	1	0.0013035	3	0.000201749	1	5.20635e-05	1	0.00108121	1	0.000137512	1	0.00125162	3	0.000376197	2	0.000662021	2	0.000176012
go	GO:0103116	ABC-type D-galactofuranose transporter																			4.37703e-05	1					9.47041e-05	1											0.000100344	2
go	GO:0110165	cellular anatomical structure	0.390953	1054	0.425376	1634	0.428246	1539	0.422307	1408	0.386573	997	0.429159	1687	0.362837	1064	0.339979	991	0.493133	1507	0.381344	919	0.430127	1207	0.400197	1158	0.388336	1273	0.386875	1252	0.299874	512	0.408024	1271	0.446033	1428	0.453009	1668	0.36451	1402	0.405175	1321	0.40369	1862	0.406048	1287	0.443684	1493	0.403872
go	GO:0140085								6.58502e-05	1					1.01021e-05	1											1.12343e-05	1
go	GO:0140096	catalytic activity, acting on a protein	0.000197209	3	0.000291656	3	0.000181996	4	0.000348941	5	8.17366e-05	2	0.000601812	6	0.000636267	9	0.0011586	13	0.000134277	3	0.00172392	8	0.00166999	11	0.000709689	5	0.000824928	6	0.000197827	5	0.00173961	9	5.73284e-05	2	0.00034977	4	0.000328933	7	0.000523125	7	0.000774015	11	0.000318274	8	0.000336761	5	0.000777146	11	0.00189811
go	GO:0140097	catalytic activity, acting on DNA	1.76226e-05	1	0.000202967	3	0.000159027	2	0.000185639	4			1.40522e-05	1	1.89148e-05	1	2.15392e-05	1	0.000142092	4	5.6582e-05	1	0.000214395	2			0	0			0.00404755	2	4.62802e-05	2			2.34455e-05	1	2.19902e-05	1	0.000149225	3	8.01017e-05	5	0.000164435	1	0.000275506	3	0.00054143
go	GO:0140098	catalytic activity, acting on RNA	0.00517416	38	0.00418179	53	0.00450117	62	0.00496372	37	0.00473415	28	0.00391526	43	0.00494547	34	0.00591921	47	0.00185703	24	0.00346808	17	0.00433355	34	0.00221642	26	0.00591447	45	0.00500249	43	0.00156645	8	0.00390204	36	0.00341123	35	0.00695256	60	0.00307306	36	0.0125547	57	0.0053222	71	0.00591851	42	0.00261583	36	0.00732596
go	GO:0140101	catalytic activity, acting on a tRNA	0.00224882	16	0.000975264	21	0.00122954	23	0.00184934	14	0.000105169	3	0.000647349	13	0.00149694	11	0.00207351	22	0.000718014	8	0.000289177	2	0.000744971	11	0.00048856	10	0.00121604	15	0.00157572	23	0.000521393	2	0.0011744	15	0.000205197	4	0.00108723	21	0.000527514	10	0.00526064	23	0.00159806	28	0.00145645	18	0.000376471	8	0.00404366
go	GO:0140104	molecular carrier activity	0.0137888	47	0.0192968	84	0.0202503	57	0.01679	70	0.0167424	51	0.0100252	49	0.0205066	66	0.0158402	57	0.00876484	46	0.0197471	45	0.0142705	50	0.0155942	41	0.0108972	62	0.0104482	53	0.0201715	38	0.018014	75	0.0188381	55	0.0124298	68	0.010989	60	0.0187871	63	0.0157359	97	0.0111627	52	0.0184476	72	0.0159441
go	GO:0140110	transcription regulator activity	0.000439667	5	0.000144769	5	0.000239345	5	0.00014589	3	0.000315188	5	0.000276344	5	0.00310191	7	0.000224842	4	0.000245026	7	0.000875428	2	0.00035752	2	0.0277151	6			0.00298651	7	7.83034e-05	1	0.000184532	1	0.000118677	3	0.00021345	6	0.000355279	7	0.000342228	6	8.47443e-05	2	0.000197653	4	0.000249197	4	0.000518753
go	GO:0140299	molecular sensor activity			3.03673e-05	1																	4.15306e-05	2							0.000293796	1											9.06449e-06	1	6.96287e-05	1			8.93235e-05
go	GO:0140352	export from cell			0.000164	3	0.000148994	1	0.00115808	3			0.000471766	1	0.000389983	1							0.000565384	3			0.00014271	1			0.000165514	2	0.000886903	4	0.000435751	2	0.000296311	1					0.00041103	2	3.31907e-05	1	0.00023976	1
go	GO:0140358	P-type transmembrane transporter activity	0.00175239	5	0.000836136	5	0.00105865	4	0.000998683	3	0.00116833	4	0.00154483	9	0.000940905	2	0.000561839	2	0.000170343	2	0.00460021	7	0.00128558	4	0.000843158	2	0.00124954	4	0.000726017	3	0.00631208	7	0.00122737	7	0.000819776	3	0.000676757	2	0.00120901	4	0.000624258	2	0.000890243	6	0.00125467	6	0.000688235	2	0.00108393
go	GO:0140359	ABC-type transporter activity	2.88702e-05	1	3.32543e-05	1	3.64575e-05	1			5.04922e-05	1	2.5802e-05	1	2.38043e-05	1	0.00023511	2			4.37703e-05	1	0	0			9.47041e-05	1					0	0			6.16399e-05	1	0.00112998	4	4.29268e-05	1	3.94474e-05	1	0.000115107	2			5.16407e-05
go	GO:0140414	phosphopantetheine-dependent carrier activity	0.0133221	39	0.0189299	74	0.0201494	54	0.0156613	56	0.0159107	36	0.00967484	42	0.0194291	52	0.0150797	45	0.00841073	38	0.019232	39	0.0140191	45	0.015097	32	0.0103599	54	0.0101367	44	0.0198868	34	0.0169256	56	0.0185631	48	0.0119676	56	0.00997046	40	0.0185333	57	0.0151	83	0.0105338	44	0.01793	60	0.0149925
go	GO:0140535	intracellular protein-containing complex			0.000170216	2	0.000107042	1	0.000158388	3			1.40522e-05	1			2.15392e-05	1	9.4202e-05	3	5.6582e-05	1			0.00028324	3					0.00401007	1	2.42833e-05	1			2.34455e-05	1	0	0	0.000243125	3	8.01017e-05	5
go	GO:0140546	defense response to symbiont	0.000246748	1	0.000572027	2	0.000824757	2	0.00357746	3	5.67988e-05	1	0.000479807	1	8.86781e-05	1	0.000165931	1	0.000712414	1	0.00426949	1	0.000663748	2	0.000479855	1	0.000183679	1	0.000241902	1	0.000361382	1	0.0013035	3	0.000201749	1	5.20635e-05	1	0.00108121	1	0.000137512	1	0.00125162	3	0.000343006	1	0.000662021	2	0.000176012
go	GO:0140640	catalytic activity, acting on a nucleic acid	0.00523939	40	0.00446342	57	0.0046602	64	0.00514936	41	0.00473415	28	0.00392931	44	0.00507304	36	0.00594075	48	0.00260785	31	0.00377174	19	0.00454794	36	0.00221642	26	0.0059652	47	0.00500249	43	0.00575581	11	0.00411784	39	0.00348993	36	0.00700909	62	0.00309505	37	0.0127039	60	0.00545095	77	0.00608295	43	0.00304467	40	0.00786739
go	GO:0140657	ATP-dependent activity	0.00187713	8	0.00129498	15	0.00143575	8	0.00138796	8	0.0012884	6	0.0020424	11	0.00210737	8	0.00134722	8	0.000303943	6	0.00467924	9	0.00281929	14	0.00141395	8	0.00162641	8	0.000750669	5	0.00694104	11	0.00196283	13	0.00125553	5	0.00112166	5	0.00267107	11	0.00107365	8	0.00415245	14	0.00202406	13	0.000991038	5	0.00113557
go	GO:0140677	molecular function activator activity	0.000322484	1	0.000934504	5	0.000774415	7			0	0	8.34046e-05	1	0.000165355	1	0.000447414	2							0.0013103	5	0.000210193	2			5.26639e-05	1	2.05429e-05	1	9.10639e-05	2	0.000509198	4			0.000169178	1			1.72251e-05	1			0.000771104
go	GO:0140678	molecular function inhibitor activity	0.000607557	6	0.00272204	8	0.00150533	6	0.00249183	8	0.00176595	8	0.000218841	3	0.000957686	8	0.000171546	1	0.000229293	5	0.00444352	9	0.00099224	6	0.00135854	7	0.000283863	5	0.000547082	6	0.000272871	2	0.00103608	7	0.000417478	4	0.000360043	4	0.00101852	5	0.000422267	6	0.000397702	5	0.00101686	7	0.000823377	6	0.000360198
go	GO:0141060	disruption of anatomical structure in another organism	0.000449915	2	0.00067984	3	0.000986463	3	0.00373259	4	0.000129887	2	0.000603887	2	0.000126752	2	0.000528632	2	0.000739774	2	0.00526466	2	0.000824061	3	0.000479855	1	0.000238175	2	0.000347304	2	0.000361382	1	0.00158752	4	0.00023559	2	7.58042e-05	2	0.00114671	2	0.000215483	2	0.00133913	4	0.00062094	2	0.000749378	3	0.000314385
go	GO:0141061	disruption of cell in another organism	0.000449915	2	0.00067984	3	0.000986463	3	0.00373259	4	0.000129887	2	0.000603887	2	0.000126752	2	0.000528632	2	0.000739774	2	0.00526466	2	0.000824061	3	0.000479855	1	0.000238175	2	0.000347304	2	0.000361382	1	0.00158752	4	0.00023559	2	7.58042e-05	2	0.00114671	2	0.000215483	2	0.00133913	4	0.00062094	2	0.000749378	3	0.000314385
go	GO:0141187	nucleic acid biosynthetic process	0.00298094	22	0.00310381	30	0.00273203	33	0.00286344	22	0.00462867	25	0.00299915	28	0.00293246	20	0.00379833	24	0.00113534	15	0.00353259	16	0.00320772	21	0.00158747	15	0.00399935	26	0.00316025	18	0.00113839	6	0.00272764	21	0.00321409	32	0.00558453	36	0.00259994	27	0.0072027	32	0.00358525	42	0.00408514	22	0.00192025	26	0.00254326
go	GO:0141188	nucleic acid catabolic process	0.000274793	3	0.000629849	9	0.000149298	2	0.000158388	3	0.000307095	2	8.83793e-05	3	0.000430259	5	0.00128611	11	0.000893216	13	0.000247074	1	0.000461269	2	0.000254583	2	0.000738694	8	0.000224585	3	0.00415188	2	0.000910349	8	0.000923991	7	0.000176183	4	0.000105075	2	0.000557681	6	0.000307596	8	0.000499014	7	0.000363206	4	7.55045e-05
go	GO:0170033	L-amino acid metabolic process			0.000112488	2			0.000170157	4					1.01021e-05	1	0.000215426	3	0.000358809	4	0.00157017	6	7.88856e-05	1			0.000617657	6	0.000106623	3	0.000261593	3					0.000351604	5	0.000477215	5	0.000109472	1	0.000161129	4	0.00027134	2	8.72528e-06	1	4.50622e-05
go	GO:0170034	L-amino acid biosynthetic process			8.74568e-05	1			0.00013498	3					1.01021e-05	1	8.06517e-05	1			0.00146753	5	7.88856e-05	1			0.000123569	4	0.000106623	3	3.358e-05	1					0.000175027	3	0.000305846	3	0.000109472	1	0.000138593	3	0.000239796	1	8.72528e-06	1	4.50622e-05
go	GO:0170038	proteinogenic amino acid biosynthetic process			8.74568e-05	1			0.000170157	4					1.01021e-05	1	8.06517e-05	1			0.00146753	5	7.88856e-05	1			0.000123569	4	0.000106623	3	0.000261593	3					0.000175027	3	0.000305846	3	0.000109472	1	0.000161129	4	0.00027134	2	8.72528e-06	1	4.50622e-05
go	GO:0170039	proteinogenic amino acid metabolic process			0.000112488	2			0.000170157	4					1.01021e-05	1	0.000215426	3	0.000358809	4	0.00157017	6	7.88856e-05	1			0.000617657	6	0.000106623	3	0.000261593	3					0.000351604	5	0.000477215	5	0.000379589	3	0.000161129	4	0.00027134	2	8.72528e-06	1	4.50622e-05
go	GO:0170041	non-proteinogenic amino acid metabolic process			0.000653575	2	0.000977405	6	0.000216271	3					0.00018612	1					0.0005739	2	0	0			0.000224779	1	0.000538705	2	0.000242684	2	0.000483646	4			0.00141889	7	9.41997e-05	1	0.000279189	3	0.000345033	4			6.78301e-05	1	0.000428318
go	GO:0180051		0.00712548	33	0.00727061	55	0.0100761	53	0.00754993	43	0.00408231	24	0.00877237	54	0.00718314	41	0.00530027	37	0.00534255	41	0.00465781	25	0.00348588	25	0.00421324	30	0.0151965	47	0.00635904	38	0.0146132	18	0.00534248	40	0.00361986	26	0.00644639	60	0.00665777	51	0.00645219	53	0.010359	76	0.0112997	41	0.00560439	33	0.0158987
go	GO:1901135	carbohydrate derivative metabolic process	0.00331959	10	0.00213031	19	0.00278973	24	0.00143874	9	0.00194481	12	0.00296278	19	0.00344304	16	0.00501379	21	0.0013889	13	0.00606225	14	0.00406411	21	0.0087876	18	0.00334291	15	0.00132749	11	0.00720129	11	0.00171877	16	0.00103997	7	0.00108308	15	0.0025113	19	0.00364891	16	0.00274223	20	0.00352776	25	0.000940106	7	0.00375788
go	GO:1901136	carbohydrate derivative catabolic process	0.00144407	4	0.000663282	8	0.00117897	11			0.000388911	4	0.00114584	6	0.00158277	8	0.0035468	11	0.000348245	5	0.000886566	3	0.00163167	7	0.00790862	15	0.000773859	2	9.54006e-05	2	0.000331621	2	0	0	6.21318e-05	2	0.00014292	4	0.000251005	6	0.00218839	5	0.0014805	8	0.00083926	7	3.00672e-05	1	8.97674e-05
go	GO:1901137	carbohydrate derivative biosynthetic process	0.00175239	5	0.00124356	9	0.00151816	11	0.00130633	6	0.0015559	8	0.00201918	14	0.00184853	7	0.00147813	8	0.00102246	7	0.00517569	11	0.00215158	13	0.00087898	3	0.00256905	13	0.00117508	8	0.00686967	9	0.00165679	14	0.000977838	5	0.000822994	8	0.00221596	12	0.00146051	11	0.00116821	11	0.00227874	17	0.000910039	6	0.00360831
go	GO:1901265	nucleoside phosphate binding	0.107392	226	0.065432	242	0.0398525	228	0.0630834	210	0.089634	208	0.0525317	199	0.0892988	200	0.108816	235	0.0712902	198	0.0801982	188	0.080825	207	0.0561049	153	0.0699984	204	0.077766	199	0.115327	183	0.0677892	226	0.0742288	188	0.0812229	262	0.064421	218	0.0833617	232	0.039309	175	0.0832701	226	0.0675251	216	0.097898
go	GO:1901292	nucleoside phosphate catabolic process	0.00142773	3	0.000663282	8	0.00113777	10			0.000388911	4	0.00114584	6	0.00158277	8	0.0035468	11	0.000348245	5	0.000452813	2	0.00163167	7	0.00650624	12	0.000773859	2	9.54006e-05	2	0.000331621	2	0	0	6.21318e-05	2	0.00014292	4	0.000251005	6	0.00218839	5	0.000117348	4	0.00083926	7	3.00672e-05	1	8.97674e-05
go	GO:1901293	nucleoside phosphate biosynthetic process	0.00182908	6	0.00137705	10	0.0016702	14	0.00108184	5	0.00134261	7	0.00201918	14	0.00188649	9	0.00147813	8	0.00102246	7	0.00478485	10	0.00215158	13	0.00107082	3	0.00277546	15	0.00117508	8	0.00751475	14	0.00165679	14	0.000977838	5	0.00091949	11	0.00231114	16	0.00156835	12	0.00119038	12	0.00227132	16	0.000910039	6	0.00414994
go	GO:1901363	heterocyclic compound binding	0.107422	227	0.0663618	251	0.0419129	240	0.0633921	214	0.089634	208	0.0526028	200	0.0899555	202	0.11036	242	0.0713014	199	0.0806358	191	0.0809782	211	0.0574029	159	0.0704829	209	0.0784041	204	0.115886	186	0.0681013	231	0.0742288	188	0.0832061	271	0.0649059	223	0.0838262	238	0.0397147	180	0.0846672	235	0.0677655	220	0.0994058
go	GO:1901564	obsolete organonitrogen compound metabolic process							0.000146561	1			0.000340399	3			0.000228774	1			0.000614809	3	0	0	0.00028324	3	3.21626e-05	1			0.00015055	1	0.000461042	4					0.000183027	2	0	0	0.00053288	4	0.000941744	3	6.78301e-05	1	0
go	GO:1901605	alpha-amino acid metabolic process			0.000766063	4	0.000977405	6	0.000386428	7					0.000196222	2	0.000726921	4	0.000358809	4	0.00214407	8	7.88856e-05	1			0.000842437	7	0.000645328	5	0.000504278	5	0.000483646	4			0.0017705	12	0.000571415	6	0.000658778	6	0.000506162	8	0.00027134	2	7.65554e-05	2	0.000627384
go	GO:1901607	alpha-amino acid biosynthetic process			8.74568e-05	1			0.000170157	4					1.01021e-05	1	0.000592147	2	3.66437e-05	1	0.00146753	5	7.88856e-05	1			0.000617657	6	0.000106623	3	0.000261593	3					0.000303092	4	0.000426228	4	0.000109472	1	0.000161129	4	0.00027134	2	8.72528e-06	1	0.000199066
go	GO:1901681	sulfur compound binding			0.000126213	3	0.000165323	2					1.95688e-05	1			4.8809e-05	1	1.11531e-05	1			4.6388e-05	1	0.000263822	2	3.74243e-05	1	6.22464e-05	2	0.000433541	1	6.34312e-05	1			0.000541337	1			0	0	3.87453e-05	2	0.000146889	2	0.0002404	4	0.000255215
go	GO:1901891	regulation of cell septum assembly	6.72998e-05	1	7.57708e-05	2	0.000150646	2			0.00032901	3	6.67438e-05	2	6.58329e-05	1	0.000507004	3	0.000218622	2			5.70819e-05	2	6.81193e-05	1	0.000230805	1	0.000225897	3			4.17513e-05	1	0.00027698	6	0.00078713	7	0	0	0.000929879	4	4.85223e-05	1	0.000459431	4	2.35868e-05	1	0.000146947
go	GO:1902494	catalytic complex	0.00252155	11	0.00232999	14	0.00239808	13	0.00147109	9	0.00140122	5	0.00179631	13	0.00164723	8	0.000971544	7	0.000408294	9	0.00590988	16	0.00157528	7	0.00189356	11	0.00150631	8	0.00105656	7	0.01182	12	0.00166838	13	0.00107965	6	0.00132512	11	0.00241198	14	0.00150777	10	0.0011705	15	0.00261606	16	0.00126617	8	0.00391055
go	GO:1902495	transmembrane transporter complex	0.00175239	5	0.00125291	6	0.00158731	10	0.00111288	4	0.00116833	4	0.00158498	10	0.000940905	2	0.000677811	3	0.000222107	3	0.00475078	8	0.00203749	9	0.000843158	2	0.00133074	5	0.000726017	3	0.00682177	10	0.00132514	9	0.000819776	3	0.000763709	3	0.00159559	8	0.000624258	2	0.00390303	8	0.00146982	8	0.000716411	3	0.00108393
go	GO:1902600	proton transmembrane transport	0.00244503	8	0.00423722	13	0.00559054	17	0.00559417	14	0.001376	7	0.00110161	8	0.00131061	5	0.00260439	8	0.000271254	3	0.00534573	12	0.00288088	9	0.00127566	5	0.00264891	12	0.00176563	10	0.0249149	22	0.00152884	8	0.00126666	10	0.00164973	9	0.00127345	4	0.00314901	9	0.00154253	13	0.00363926	12	0.00107583	5	0.00657131
go	GO:1904680	peptide transmembrane transporter activity					7.99954e-05	1	3.64127e-05	1	0.000450642	2					0.000245229	2			4.15405e-05	1	0.000296952	2					2.39542e-05	1							0.000116784	2			0.000240228	3	0.000276726	4
go	GO:1905368	peptidase complex																							0.00028324	3
go	GO:1905369	endopeptidase complex																							0.00028324	3
go	GO:1905710	positive regulation of membrane permeability	0.000246748	1	0.000433158	1	0.000675763	1	0.00255798	1	5.67988e-05	1	0.000479807	1	8.86781e-05	1	0.000165931	1	0.000712414	1	0.00426949	1	0.000484225	1	0.000479855	1	0.000183679	1	0.000241902	1	0.000361382	1	0.000467145	1	0.000201749	1	5.20635e-05	1	0.00108121	1	0.000137512	1	0.000840586	1	0.000343006	1	0.000422261	1	0.000176012
go	GO:1990204	oxidoreductase complex	0.000769161	6	0.00123191	5	0.000214702	4	0.000273805	2	0.000232882	1	0.000237427	3	0.000706323	6	0.000224706	3	9.17888e-05	3	0.00136332	9	0	0	0.00076716	6	0.000256779	4	0.000330548	4	0.00149785	4	0.000416617	5	0.000259873	3	0.000556984	5	0.000603872	6	0.000570126	4	9.75834e-05	2	0.00125938	9	0.00054976	5	0.00279422
go	GO:1990351	transporter complex	0.00175239	5	0.00125291	6	0.00158731	10	0.00111288	4	0.00116833	4	0.00158498	10	0.000940905	2	0.000677811	3	0.000222107	3	0.00475078	8	0.00203749	9	0.000843158	2	0.00133074	5	0.000726017	3	0.00682177	10	0.00132514	9	0.000819776	3	0.000763709	3	0.00159559	8	0.000624258	2	0.00390303	8	0.00146982	8	0.000716411	3	0.00108393
go	GO:1990904	ribonucleoprotein complex	0.38853	1104	0.447934	1697	0.430223	1603	0.417917	1498	0.411065	1047	0.457924	1803	0.371726	1117	0.341806	1047	0.52449	1637	0.294205	895	0.436131	1259	0.413665	1194	0.389257	1333	0.389429	1300	0.287271	531	0.39465	1313	0.457722	1501	0.485081	1779	0.345734	1453	0.393159	1365	0.405993	1980	0.421384	1338	0.445956	1554	0.422101
go	GO:2001065	mannan binding															0.000228774	1																													4.56017e-05	1
go	GO:2001141	regulation of RNA biosynthetic process	0.00201867	16	0.0011595	21	0.00144669	20	0.00169464	11	0.00227805	18	0.00106361	12	0.00626769	25	0.00156476	17	0.00129127	24	0.0194472	26	0.00283365	18	0.0289072	17	0.00175619	12	0.00489963	20	0.000441762	3	0.00754692	26	0.00240784	25	0.00343718	28	0.00473459	37	0.00179112	23	0.0121798	40	0.00272651	21	0.00137094	17	0.00190699
go	GO:unannotated		0.258448	949	0.231483	1422	0.244482	1172	0.238513	1117	0.24882	830	0.202398	1234	0.261008	961	0.275374	1005	0.168198	1066	0.292349	829	0.261736	973	0.275652	785	0.286008	1229	0.34374	937	0.319313	606	0.263938	1232	0.220215	1050	0.209969	1221	0.30888	1309	0.27834	1306	0.267924	1618	0.23264	1069	0.263695	1143	0.251705
is_essential_gene	TRUE		0.262515	766	0.292685	1186	0.268027	1082	0.256828	978	0.3093	792	0.307002	1248	0.290336	837	0.2652	814	0.332596	1054	0.187121	618	0.314486	934	0.270384	855	0.297837	998	0.266893	958	0.214376	388	0.27341	920	0.321745	1075	0.334655	1284	0.234739	1001	0.295037	1002	0.253412	1286	0.289906	968	0.293908	1112	0.31287
is_essential_gene	unannotated		0.737485	2243	0.707315	3342	0.731973	3029	0.743172	2783	0.6907	2036	0.692998	3127	0.709664	2338	0.7348	2348	0.667404	2811	0.812879	2024	0.685514	2286	0.729616	2040	0.702163	2669	0.733107	2280	0.785624	1393	0.72659	2880	0.678255	2522	0.665345	3115	0.765261	3142	0.704963	2893	0.746588	3921	0.710094	2612	0.706092	2756	0.68713
is_smorf	TRUE		0.924623	2723	0.945091	4134	0.945276	3827	0.936733	3445	0.943206	2579	0.943489	4001	0.919136	2891	0.945538	2895	0.954335	3506	0.923099	2388	0.927658	2963	0.948807	2653	0.920711	3321	0.938357	2962	0.906598	1595	0.930188	3468	0.920125	3245	0.946689	4049	0.929593	3814	0.928665	3548	0.930716	4726	0.941224	3273	0.940552	3529	0.93782
kegg_brite	br01601	(table) Enzymes of 2-oxocarboxylic acid metabolism			1.3187e-05	1	0.000767531	4	0.000200072	3	0.000486835	1	4.01453e-05	2	0.0042745	6	0.000644718	3	0.000440003	4	0.000372955	4	0.000603749	4	0.000439579	5	0.000257467	1			0.000515113	3	6.03665e-05	2	0.00518947	6	0.00101869	9	0.000162299	3	0.000460128	5	0.000145128	3	0.000408613	1			0.000330246
kegg_brite	br01610	(table) Ribosomal proteins	0.0390539	173	0.0374691	206	0.0356491	205	0.0318882	203	0.0725595	228	0.0532066	302	0.0597456	218	0.0462648	171	0.0786059	304	0.0626936	183	0.0495051	195	0.0504505	209	0.0493245	225	0.056267	247	0.026144	75	0.061143	273	0.0598816	252	0.0527328	256	0.044742	262	0.0462094	211	0.0596646	352	0.0491135	194	0.0424805	243	0.0633889
kegg_brite	br01611	(table) RNA polymerases	0.000317597	1	0.000361547	3	0.000223072	5	0.000199279	1	0.00114078	3	0.000267765	5	0.000356345	4	0.000178568	2	0.000114452	1	0.00119679	6	0.000763493	2	0.000117832	2	0.00257489	13	0.000555913	3			0.000233021	2	0.000721536	3	0.0002184	2	0.000604881	5	0.000730259	3	0.000346038	7	0.000480932	3	7.72723e-05	3	0.000606532
kegg_brite	ko00000		0.104692	408	0.100472	504	0.0971659	499	0.0860143	455	0.152302	488	0.123302	653	0.151116	540	0.13369	469	0.144736	609	0.175144	465	0.11031	420	0.0985629	438	0.121788	537	0.125315	491	0.116682	251	0.152456	667	0.114607	498	0.110158	585	0.120744	608	0.107296	513	0.126422	744	0.117002	475	0.0983679	535	0.132591
kegg_brite	ko00001	KEGG Orthology (KO)	0.0457963	222	0.0548274	292	0.0623798	330	0.04073	259	0.0852119	296	0.0610374	371	0.0882544	335	0.0694279	278	0.0884241	389	0.0899333	263	0.0755569	263	0.0614427	279	0.071291	345	0.0732443	311	0.0711775	145	0.0757731	371	0.0733388	311	0.0672646	353	0.0541382	352	0.0657334	317	0.0739606	458	0.073495	289	0.0537684	336	0.0770369
kegg_brite	ko00002	KEGG modules	0.0432522	202	0.0434485	252	0.045954	276	0.0364112	230	0.0796312	270	0.0578508	339	0.0754585	294	0.0557133	232	0.0829381	341	0.0769368	233	0.056481	234	0.0567937	252	0.0601521	292	0.0654028	283	0.0492035	109	0.0664027	316	0.0675153	281	0.0626837	316	0.0486151	313	0.0558278	276	0.0630843	409	0.0640342	241	0.0459938	277	0.0737583
kegg_brite	ko01000	Enzymes	0.00430672	29	0.0142159	55	0.0141576	85	0.00597452	37	0.00577662	32	0.00281979	23	0.0197372	84	0.0159232	70	0.00508051	51	0.0116911	52	0.0150872	43	0.00644313	40	0.0104259	63	0.0121548	34	0.0338187	44	0.00619489	48	0.0127484	31	0.00941909	61	0.00833814	68	0.013772	70	0.00466232	59	0.0203164	60	0.00606905	47	0.0105739
kegg_brite	ko01005	Lipopolysaccharide biosynthesis proteins																			0.00048491	2																	3.8115e-05	1
kegg_brite	ko01007	Amino acid related enzymes			0.000249213	3	0.000142614	2	0.000623406	1	0.000167194	1			0.000151471	1	0.000287384	6	7.68515e-05	3	0.000715757	3	0.000264149	4	3.81396e-05	1	0.000208941	2	0.000148414	1	0	0	0.000145443	1	4.12057e-05	1	0.000203089	2	7.12254e-05	2	0.000559185	2	0.00016685	3	0	0			0.00278581
kegg_brite	ko01011	Peptidoglycan biosynthesis and degradation proteins											0	0	1.21757e-05	1			3.30292e-05	1			0	0	3.5822e-05	1											1.49834e-05	1			7.0556e-05	2			0.000112112	1			6.65925e-05
kegg_brite	ko01504	Antimicrobial resistance genes									0.000213293	1					0	0																											1.30661e-05	1
kegg_brite	ko02000	Transporters	0.0099823	28	0.00554219	35	0.010979	39	0.00631909	29	0.0156379	38	0.0120164	58	0.0160821	41	0.0155417	37	0.00678017	27	0.00578313	14	0.00755477	29	0.0109548	40	0.01205	46	0.0111167	41	0.0104121	18	0.0154109	46	0.00715001	35	0.0108428	53	0.00987851	39	0.0119799	38	0.00882437	49	0.0111976	45	0.00887235	41	0.0139995
kegg_brite	ko02022	Two-component system									0.000283059	1											0.000295733	1
kegg_brite	ko02044	Secretion system	0.000464615	7	0.000335304	7	0.000273667	5	7.26272e-05	3	0.000349768	7	0.00114227	13	0.000756481	6	0.0010678	10	0.000131783	4			0.000349778	4	0.00077764	10	0.000647393	7	0.000354341	6	0.000147738	3	0.000267573	4	0.000561198	7	0.000455989	8	0.00019248	5	0.000658471	8	0.000376317	9	0.000489486	7	0.000427752	8	0.000152732
kegg_brite	ko02048	Prokaryotic defense system	0	0					0.000104113	2	3.03473e-05	1					0	0							5.58426e-05	1	0.000442022	6			7.99139e-05	1	0.000255377	2					5.74155e-05	2	6.52553e-05	1	6.16962e-05	1	2.81555e-05	2
kegg_brite	ko03000	Transcription factors	0.00561494	16	0.00177696	10	0.00138401	7	0.00115621	4	0.00431311	12	0.00350398	8	0.00636066	19	0.00285693	10	0.00398174	15	0.00197139	6	0.0014097	9	0.00354963	8	0.0029681	10	0.00250091	8	0.00389573	7	0.00816869	28	0.00261885	12	0.00341041	13	0.0104745	18	0.0029681	8	0.00288032	15	0.00395618	14	0.00266184	15	0.00320897
kegg_brite	ko03009	Ribosome biogenesis	0.000942416	6	0.00330496	16	0.00152364	10	0.000165194	2	0.000208237	3	0.00196406	18	0.000476255	6	0.000869253	4	0.0025742	16	0.00151047	5	0.00106744	3	0.0023606	11	0.00293707	9	0.00041418	7	0	0	0.00241586	14	0.00651574	15	0.00179825	12	0.00304041	11	0.00160269	11	0.00228863	18	0.00247668	13	0.000459308	7	0.00114761
kegg_brite	ko03011	Ribosome	0.0395166	175	0.0376855	207	0.0356491	205	0.0318882	203	0.0725595	228	0.0532066	302	0.0597708	219	0.0463693	172	0.0786059	304	0.0627345	184	0.0495051	195	0.0505987	210	0.0493566	226	0.056267	247	0.026144	75	0.061143	273	0.0598816	252	0.0535995	260	0.044742	262	0.0462094	211	0.0601868	356	0.0491135	194	0.0424805	243	0.0633889
kegg_brite	ko03012	Translation factors	0.00273738	8	0.000318398	3	0.000471203	4	0.000148333	2	0.000824175	4	0.00016719	2	0.000411391	2	0.000167498	4	0.000298518	3	0.00188763	8	0.00012842	4	0.000414048	4	0.00513498	7	0.000529031	2			0.000157858	3	7.71084e-05	1	4.10233e-05	1	0.000916948	8	0.000428433	7	0.0008995	5	4.26761e-05	1	0.000830342	3	0.000265759
kegg_brite	ko03019	Messenger RNA biogenesis	0.000864966	6	0.000150411	3	0.000483104	3	0.00090038	6	0.000354856	3	0.000658826	3	0.00147509	6	0.000543484	7	0.000189931	4	0.00247361	4	0.000509622	3	0.000291833	3	0.00204367	10	0.000239589	3	0	0	0.00153061	9	0.000764216	5	0.000224215	3	0.000115894	3	0.000111046	1	0.000418847	5	0.000939699	7	0.000501308	6
kegg_brite	ko03021	Transcription machinery	0.000508207	2	0.000397796	4	0.000223072	5	0.000199279	1	0.00114078	3	0.000267765	5	0.000356345	4	0.000439095	4	0.000114452	1	0.00188297	7	0.000763493	2	0.000117832	2	0.004033	16	0.000555913	3			0.00396085	3	0.000783152	4	0.000559714	5	0.000640252	6	0.000730259	3	0.000346038	7	0.000520871	4	0.000101026	4	0.000606532
kegg_brite	ko03029	Mitochondrial biogenesis	0.0331476	86	0.0178377	91	0.0128446	72	0.0217443	97	0.0430568	91	0.0274169	107	0.0315736	96	0.0433162	98	0.0322669	96	0.0296916	85	0.0269345	88	0.0140051	62	0.0319206	85	0.0414609	98	0.0253986	55	0.0356263	126	0.0197909	74	0.0242027	94	0.0232656	105	0.0214168	89	0.0157696	79	0.0165994	71	0.0254387	85	0.0477643
kegg_brite	ko03032	DNA replication proteins	0.0142776	56	0.0222603	73	0.0120083	51	0.0166223	79	0.00930674	45	0.0259529	122	0.0173328	61	0.00548378	36	0.0267712	87	0.0232587	58	0.0077649	49	0.00815244	46	0.0099495	57	0.00992666	50	0.00597173	26	0.0219813	85	0.0131546	70	0.0129861	85	0.0228389	96	0.0101434	60	0.0276401	127	0.0129525	51	0.0106663	61	0.00537907
kegg_brite	ko03036	Chromosome and associated proteins	0.0145999	59	0.0223808	75	0.0138827	54	0.0170313	82	0.00959001	47	0.0266908	125	0.0191374	65	0.00549808	36	0.0268224	88	0.0255772	60	0.00795654	53	0.00919537	51	0.0117874	62	0.0101662	53	0.00605164	27	0.0229897	89	0.0137013	73	0.0132074	89	0.0228772	97	0.0101434	60	0.027894	130	0.0136874	56	0.012062	73	0.00537907
kegg_brite	ko03110	Chaperones and folding catalysts	0.0232542	51	0.00862569	52	0.00982305	43	0.0137417	54	0.0345528	63	0.0172577	61	0.0198293	59	0.0329994	66	0.0148681	56	0.0203316	58	0.014393	43	0.00958514	33	0.0157993	45	0.0263237	47	0.0207013	49	0.0197913	78	0.009724	35	0.0147939	51	0.00920595	43	0.0104924	47	0.0044081	26	0.00917061	36	0.020053	57	0.0265666
kegg_brite	ko03400	DNA repair and recombination proteins	0.0145952	57	0.0227256	76	0.0123283	57	0.0168215	80	0.0104475	48	0.0262136	127	0.0176891	65	0.00566234	38	0.0269141	89	0.0231827	57	0.0085284	51	0.00827027	48	0.0124488	68	0.0104826	53	0.00998179	27	0.0221759	86	0.0138762	73	0.013228	88	0.0233586	99	0.01093	64	0.0280037	136	0.0133899	53	0.0109197	65	0.00598561
kegg_brite	ko04131	Membrane trafficking	0.000991361	3	0.00126356	4	0.000858935	5	7.76504e-05	1	0.000736631	4	0.00121333	3	0.000583435	3	0.00099149	6	3.12863e-05	2	0.000430173	1			0.00020825	2	0.00014215	1			0.00133636	4	0.000978922	7			0.00259712	2	0.00019715	1	0.0001009	1			0.00407107	4	4.56017e-05	1	0.000349618
kegg_brite	ko04147	Exosome	0.00453271	20	0.00620012	21	0.00553864	21	0.00338333	16	0.00250258	12	0.00185599	12	0.00322279	19	0.00199548	14	0.000245611	7	0.00587779	17	0.00194881	11	0.00572685	24	0.00670046	12	0.00280907	9	0.00191672	7	0.0024916	18	0.000417478	4	0.0031528	7	0.00376266	15	0.00095971	15	0.00137891	12	0.00955309	20	0.00287904	19	0.000727383
kegg_brite	ko04812	Cytoskeleton proteins															0	0	5.11821e-05	1			2.03301e-05	1	5.58426e-05	1	0.00177134	6			7.99139e-05	1					3.04707e-05	2	3.54253e-05	1					0.000123021	3	2.35868e-05	1
kegg_brite	unannotated		0.895308	2601	0.899528	4024	0.902834	3612	0.913986	3306	0.847698	2340	0.876698	3722	0.848884	2635	0.86631	2693	0.855264	3256	0.824856	2177	0.88969	2800	0.901437	2457	0.878212	3130	0.874685	2747	0.883318	1530	0.847544	3133	0.885393	3099	0.889842	3814	0.879256	3535	0.892704	3382	0.873578	4463	0.882998	3105	0.901632	3333	0.867409
kegg_ko	K00008	Carbohydrate metabolism | Other carbohydrate metabolism | Glucuronate pathway (uronate pathway) (9) (2 blocks missing 5/7)					0.000186681	1	0.000104206	1													8.86974e-05	1											0	0	0	0
kegg_ko	K00031	Energy metabolism | ATP synthesis | Reductive citrate cycle (Arnon-Buchanan cycle) (40) (complete 10/10)									2.20191e-05	1									0.000164644	1					0	0											0.000140533	2	9.35487e-05	1							6.14975e-05
kegg_ko	K00053	Amino acid metabolism | Other amino acid metabolism | Isoleucine biosynthesis, threonine => 2-oxobutanoate => isoleucine (8) (complete 5/5)	0.00132545	6	0.000815018	5	0.00151853	5	0.000314243	1	0.00131623	9	0.000534829	4	0.000842709	4	0.000702422	5	7.0397e-05	1	0.000135579	1	0.000551629	6			0.00262215	12			0.00157137	9	1.59092e-05	1	0	0	0.000850593	7	0.000507141	3	0.000459549	3	0.00171391	8	0.0033425	10	0.00013098	2	0.000217414
kegg_ko	K00058	Amino acid metabolism | Other amino acid metabolism | Serine biosynthesis, glycerate-3P => serine (6) (complete 3/3)	0.000126153	1	3.30423e-05	1	0.000226377	1																											0	0	2.6451e-05	1	5.99683e-05	1	0.000336045	4			0	0
kegg_ko	K00074	Xenobiotics biodegradation | Aromatics degradation | Phenylacetate degradation, phenylaxetate => acetyl-CoA/succinyl-CoA (11) (complete 7/7)			0.00349538	2	0.00325653	1	0.00153045	1	0.00600191	1	0.000947432	1	0.00708404	1	0.00742041	2			0.000897322	2			0.000235465	2	0.000238432	1	0.00448421	1	0.00478946	2	7.23253e-05	2	0.00274191	1	7.78158e-05	1	0.00268381	2	0.00289699	2	0.00163737	1					0.00424605
kegg_ko	K00134	Energy metabolism | ATP synthesis | Reductive pentose phosphate cycle (Calvin cycle) (18) (complete 11/11)	0.00137878	5	0.00133978	5	0.00156111	9	0.00124843	7	0.000736631	4	0.00172217	6	0.00092265	6	0.0011693	7	0.00157717	5	0.000904412	2	0.00107574	3	0.00129319	6	0.00253184	4	0.00125187	7	0.00114471	2	0.00127076	7	0.000153105	2	0.00281499	3	0.00178888	5	0.00139606	6	0.00160274	8	0.00504009	7	0.000282821	1	0.0020116
kegg_ko	K00176	Energy metabolism | ATP synthesis | Incomplete reductive citrate cycle, acetyl-CoA => oxoglutarate (17) (complete 7/7)	0.000224064	3	0.000664084	6	0.000833371	6	0.00300818	14			0.000141806	2	0.000234622	2	0.000209264	1	6.54643e-05	2	0.00166538	4	0.000348124	2	0	0	0.00137017	6	8.73243e-05	1	0.0035073	4	0.00160394	8	0.000348186	2	4.26744e-05	1	0.00149171	9	0.00468858	12	0.00123546	7	3.16644e-05	1	0.00032049	3	0.000278896
kegg_ko	K00194	Energy metabolism | ATP synthesis | Acetyl-CoA pathway, CO2 => acetyl-CoA (5) (complete 2/2)	0.00214166	4					0.000115487	2													0.00204231	6			0.000514294	5	0.000496065	3									9.47551e-05	2
kegg_ko	K00198	Energy metabolism | ATP synthesis | Reductive acetyl-CoA pathway (Wood-Ljungdahl pathway) (16) (complete 7/7)			0.000112952	1	0.00111259	2																											0.000407629	1			7.19876e-05	1			0.000488723	1
kegg_ko	K00239	Energy metabolism | ATP synthesis | Succinate dehydrogenase, prokaryotes (5) (complete 1/1)	1.40882e-05	1																																							9.49567e-05	1			9.74284e-05	1
kegg_ko	K00262		0.000127426	1	0.00152819	17	0.00498064	12	0.00383475	12	0.000702356	6	0.000296994	5	0.000799025	8	0.00147889	13	0.000154758	3	0.00105655	5	0.00602374	15	0.000222879	4	0.00218778	12	0.000911375	7	0.00289908	4	0.000403799	6	0.000157885	4	0.00236669	16	0.00155336	16	0.00198121	13	0.000717533	10	0.00171675	13	1.46946e-05	1	0.000705069
kegg_ko	K00286	Amino acid metabolism | Other amino acid metabolism | Proline metabolism (3) (complete 3/3)	0.000266677	2			5.38209e-05	1																					2.12201e-05	1	8.29555e-05	1									0.000142085	1					1.70695e-05	1
kegg_ko	K00297	Energy metabolism | ATP synthesis | Reductive acetyl-CoA pathway (Wood-Ljungdahl pathway) (16) (complete 7/7)															8.06517e-05	1									7.24005e-05	2					6.41092e-05	1	0	0			0.000168783	2					0.000239796	1
kegg_ko	K00602	Nucleotide metabolism | Pyrimidine metabolism | De novo purine biosynthesis, PRPP + glutamine => IMP (24) (complete 8/8)							5.72897e-05	1									1.63046e-05	1	0.000403938	3					0.000187355	2	3.76373e-05	1	0.000320392	2			0	0	7.1872e-05	1			0.000413658	2			6.05058e-05	1	0.000185072	2
kegg_ko	K00615	Energy metabolism | ATP synthesis | Reductive pentose phosphate cycle (Calvin cycle) (18) (complete 11/11)							1.96905e-05	1																																							0.000243603
kegg_ko	K00620	Amino acid metabolism | Other amino acid metabolism | Ornithine biosynthesis, glutamate => ornithine (13) (complete 4/4)							6.58502e-05	1					1.01021e-05	1											1.12343e-05	1
kegg_ko	K00656		0.000921518	4	0.00138457	8	0.00248461	12	0.00102713	4	0.000117375	2	0.00138722	5	0.00181587	8	0.00113151	4	0.000259895	3	0.000625825	2	0.000526573	3	0.000464537	3	0.00297529	6	0.000654679	4	0.00112169	3	0.00255237	7	0.000534399	4	0.000950718	9	0.00157607	8	0.000988707	6	0.00560554	15	0.00167711	7	0.00291482	8	0.00235904
kegg_ko	K00703	Carbohydrate metabolism | Other carbohydrate metabolism | Trehalose biosynthesis, D-glucose 1P => trehalose (7) (complete 6/6)	0.000430196	2	6.50054e-05	2															3.71077e-05	1			7.2903e-05	1							0.000146962	2											0	0	7.7211e-05	1	0.000197141
kegg_ko	K00761		0.000257202	2			0.000124102	2									0.000187331	1	3.46048e-05	1			0.000293892	2			0.000733447	3	0.000150423	2	0.000162701	1	0.000130707	1	0	0	0.000134125	1	0.000190737	3	2.71818e-05	1			0	0	0.00010067	2
kegg_ko	K00789	Biosynthesis of other secondary metabolites | Biosynthesis of other bacterial compounds | Mugineic acid biosynthesis, methionine => 3-epihydroxymugineic acid (3) (2 blocks missing 3/5)							9.36397e-05	1	7.62146e-05	1			0.000186248	3	0.000139069	1									0.000162968	2													0.000173867	2	5.06768e-05	1	0.000127546	1	8.58478e-05	1
kegg_ko	K00820	Glycan metabolism | Other polysaccharide metabolism | UDP-MurNAc biosynthesis, Fru-6P => UDP-MurNAc (5) (complete 5/5)																																			0.000132478	1
kegg_ko	K00826	Metabolism of cofactors and vitamins | Cofactor and vitamin metabolism | Pantothenate biosynthesis, valine/L-aspartate => pantothenate (6) (complete 5/5)			0.000196974	4	9.75683e-05	1	0	0	0.000318099	2									0.000179305	2					2.80718e-05	1			0.000243891	1					5.14788e-05	1			9.76968e-05	1
kegg_ko	K00831	Metabolism of cofactors and vitamins | Cofactor and vitamin metabolism | Pyridoxal-P biosynthesis, erythrose-4P => pyridoxal-P (6) (complete 6/6)	3.85663e-05	1	0.00032444	4	5.08026e-05	1	0.000634195	4			0.000602335	2	8.90318e-05	1	9.46254e-05	1			0.000901452	4	0	0	1.31635e-05	1	0.00065822	1					1.17726e-05	1	8.70124e-05	2	5.73506e-05	2	0.000221695	2	0.00012699	1	0.000278814	4	0	0	0.000451965	5	0.000280937
kegg_ko	K00895				2.0789e-05	1			0.000242153	1
kegg_ko	K00925	Energy metabolism | ATP synthesis | Methanogenesis, acetate => methane (30) (complete 5/5)	0.000334823	3			0.000505247	6	9.35984e-05	1	0.000135808	1	0.000519938	3	0.000565881	7	0	0	7.79439e-05	3	0.000396769	3	0.000306965	3			0.000781862	7	7.32467e-05	1	0.00124026	4	0.000673194	3	0	0			0.00198637	7	0.000690074	8	0.000369947	3	0.00229468	5	0.000401536	5	0.000142656
kegg_ko	K00926								0.000212631	1	0.000176502	1	9.41008e-05	3			4.06525e-05	1							0.000140691	2	0.000220345	2	0.00049482	2			0	0			0.000413095	2			0.000149579	2
kegg_ko	K00927	Energy metabolism | ATP synthesis | Reductive pentose phosphate cycle (Calvin cycle) (18) (complete 11/11)	0.00142773	3	9.20819e-05	2	0.000861719	6			0.000152112	2	0.00056168	2	0.00013209	2	0.00014798	1	0.000554461	2			0.000714933	2	0.0026495	6			4.1845e-05	1	0.000331621	2			4.14167e-05	1	6.95189e-05	2	0.000116658	2	0.00013603	1	2.72089e-05	1	0.000423734	3	3.00672e-05	1	4.66655e-05
kegg_ko	K00939	Nucleotide metabolism | Pyrimidine metabolism | Adenine ribonucleotide biosynthesis, IMP => ADP,ATP (6) (complete 4/4)	9.72911e-05	1	4.82265e-05	1							3.05085e-05	1			5.68158e-05	1																							0.000181416	4
kegg_ko	K00948	Carbohydrate metabolism | Other carbohydrate metabolism | PRPP biosynthesis, ribose 5P => PRPP (1) (complete 1/1)																													0.000245916	2					3.83001e-05	1	1.36619e-05	1			6.90889e-05	1					0.000561368
kegg_ko	K00979	Glycan metabolism | Other polysaccharide metabolism | CMP-3-deoxy-D-manno-octulosonate biosynthesis, ribulose-5P => CMP-KDO (4) (complete 4/4)
kegg_ko	K01091												0.000347037	1							0.000188185	1
kegg_ko	K01222																		2.27487e-05	1					0.000107291	1							3.45648e-05	1	0	0											0.000306307	1
kegg_ko	K01274						3.23664e-05	1					1.50939e-05	1									0.000149423	1	0.000124707	1
kegg_ko	K01419
kegg_ko	K01430		0.00111354	3	0.0017923	8	0.00335711	8	0.00326068	6	0.000631957	4	0.00229506	8	0.000575193	3	0.000950752	3	0.00114766	5	0.0054813	7	0.00127142	4	0.000694707	5	0.00225383	6	0.000556814	2	0.000814773	2	0.000583098	3	0.00165171	8	0.000821224	4	0.000884111	3	0.000269967	2	0.000807737	5	0.000540757	4	0.00124246	5	0.0010429
kegg_ko	K01442				0.00016678	2	0	0	7.35789e-05	2																																			0	0			0
kegg_ko	K01448																				0.000433753	1
kegg_ko	K01449
kegg_ko	K01464	Nucleotide metabolism | Pyrimidine metabolism | Pyrimidine degradation, uracil => beta-alanine, thymine => 3-aminoisobutanoate (6) (complete 3/3)																							0	0							0.000163943	1
kegg_ko	K01580	Amino acid metabolism | Other amino acid metabolism | GABA (gamma-Aminobutyrate) shunt (8) (complete 3/3)
kegg_ko	K01604				0.000152849	4	5.04429e-05	2	3.22389e-05	1							0.000267512	4	8.05189e-05	2			0.00058661	5	0.000817233	3	0.000727398	8	0.000167241	2	0.000144342	1	0.000261913	3	0	0	0.000541337	1	0.000102749	2	0.000372233	6	0.000109222	3	0.000726845	5	5.12916e-05	1	8.54139e-05
kegg_ko	K01610	Energy metabolism | ATP synthesis | C4-dicarboxylic acid cycle, phosphoenolpyruvate carboxykinase type (4) (complete 4/4)					0.000256053	1							0.00108838	2	0.00339579	3			0.00303336	1	0.000598457	3			0.000476198	3													0.00016424	3	9.68092e-05	1	0.00461949	3			5.37466e-05
kegg_ko	K01624	Energy metabolism | ATP synthesis | Formaldehyde assimilation, xylulose monophosphate pathway (3) (1 block missing 3/4)	0.000606222	3	0.00103169	6	0.00100753	6	4.15514e-05	1	0.00117764	8	0.000390696	3	0.00163571	11	0.00344629	8			0.00014074	1	0.00127678	7	0.000233586	2	0.000438998	3	1.99399e-05	1	0.000729857	2	0.000205112	3	0	0	0.000124298	1	0.00325609	12	0.00233688	5	0.000281593	5	0.00302236	5	0.00104277	6	0.000136522
kegg_ko	K01625	Carbohydrate metabolism | Other carbohydrate metabolism | D-Glucuronate degradation, D-glucuronate => pyruvate + D-glyceraldehyde 3P (7) (complete 5/5)	7.41602e-05	1	6.19366e-05	1	0.000471832	5	0.000218068	3					0.000140759	2	0	0	0.000648214	1			9.46912e-05	1	4.41586e-05	1	0.000317442	4	0.000502092	3			0.000145838	2	0.000587271	2			0.000151386	1	0.000152222	2	0.000116482	2	0.000171887	3			0.000233102
kegg_ko	K01643																				0	0																			0.000186743	2
kegg_ko	K01646		0.000405596	4	0.000663765	5	0.000158595	2	0.000882045	8	0.000398042	7	0.000468608	7	0.00191202	5	0.000375506	2	8.14006e-05	2	0.000100565	1	0.000191214	2	8.53378e-05	1	0.000109258	2	0.000114305	1	0.000753087	3	0.000326743	4	0.000339089	3	0.000325328	4	9.0674e-05	2	0.000481372	5	4.92164e-05	1	0.000316986	2	0.000321707	5	0.000620071
kegg_ko	K01652	Amino acid metabolism | Other amino acid metabolism | Isoleucine biosynthesis, threonine => 2-oxobutanoate => isoleucine (8) (complete 5/5)																											3.80449e-05	1
kegg_ko	K01659	Carbohydrate metabolism | Other carbohydrate metabolism | Methylcitrate cycle (23) (complete 7/7)			1.76736e-05	1			0.000245182	2																	1.2492e-05	1			0.000149454	1					5.95299e-05	1
kegg_ko	K01685	Carbohydrate metabolism | Other carbohydrate metabolism | D-Galacturonate degradation (bacteria), D-galacturonate => pyruvate + D-glyceraldehyde 3P (8) (complete 5/5)													0	0											0.000178514	1					0	0											5.43231e-05	1
kegg_ko	K01689	Energy metabolism | ATP synthesis | Formaldehyde assimilation, serine pathway (10) (complete 9/9)	0.000301976	2	4.48516e-05	1	0.000797783	3			0.000370132	2			0.000502212	2	0.000386625	3			0.000237224	1			4.22924e-05	1	5.70781e-05	2			0.000162814	1	9.49279e-05	1	3.92564e-05	1	6.12113e-05	1	0.000408991	3			0.000230362	4	0.00496696	4	0.000357895	3
kegg_ko	K01712	Amino acid metabolism | Other amino acid metabolism | Histidine degradation, histidine => N-formiminoglutamate => glutamate (8) (complete 4/4)					0	0													0	0
kegg_ko	K01714	Amino acid metabolism | Other amino acid metabolism | Lysine biosynthesis, DAP aminotransferase pathway, aspartate => lysine (10) (complete 7/7)	8.92917e-05	1	7.14781e-05	1	1.72541e-05	1	0.000378131	5			3.47996e-05	1	0.00059129	4	4.57824e-05	1			9.24272e-05	1	1.12411e-05	1							0.000818635	2	0.000100406	2					0.000944202	8	0.00035556	6	5.48957e-05	1	7.51402e-05	2	0.000127076	1
kegg_ko	K01740						0.000409727	2	6.97097e-05	2																					0	0					0.000117039	1			0.000279189	3	2.49143e-05	1					0.000428318
kegg_ko	K01754	Amino acid metabolism | Other amino acid metabolism | Isoleucine biosynthesis, threonine => 2-oxobutanoate => isoleucine (8) (complete 5/5)																											0.000122882	2															5.43936e-05	1	0.000707682	2	2.47116e-05
kegg_ko	K01811								0	0									0.000114459	1											0.000828288	3							0.000117883	2
kegg_ko	K01818		0.00013199	1	0.000270943	1					0	0					0.000127168	1			0.000104503	1	0.000179284	1	0.00024712	2					0.000795685	2											0.000100031	1
kegg_ko	K01834	Carbohydrate metabolism | Other carbohydrate metabolism | Gluconeogenesis, oxaloacetate => fructose-6P (21) (complete 7/7)					8.19066e-05	2																	0.000285524	2																					4.56017e-05	1
kegg_ko	K01854	Glycan metabolism | Other polysaccharide metabolism | UDP-Galf biosynthesis, UDP-Glc => UDP-Galf (2) (complete 2/2)					0.000123341	1											0.00022074	3													7.52097e-05	2							8.49822e-06	1
kegg_ko	K01868				0.00013274	2	0.000330305	4	0.000112329	1	0	0			0.000151471	1	0.00019871	2			0.000220623	1	0.000181987	2					0.000148414	1			0.000130849	3	4.12057e-05	1	0.000249086	3	1.50628e-05	1			1.83275e-05	1	8.24368e-05	1	0	0	0.000147831
kegg_ko	K01918	Metabolism of cofactors and vitamins | Cofactor and vitamin metabolism | Pantothenate biosynthesis, 2-oxoisovalerate/spermine => pantothenate (4) (1 block missing 4/5)
kegg_ko	K01924				2.2254e-05	1													0.000165313	2					3.5822e-05	1											1.49834e-05	1	0.000211556	1	7.0556e-05	2							5.29823e-05
kegg_ko	K01928				0.000116392	1																	5.6979e-05	1
kegg_ko	K01929
kegg_ko	K01933	Nucleotide metabolism | Pyrimidine metabolism | De novo purine biosynthesis, PRPP + glutamine => IMP (24) (complete 8/8)			0.000437924	5	0.000206649	3																							0	0			1.7044e-05	1	7.37663e-06	1	1.33467e-05	1			6.95702e-05	2			0	0	9.46994e-06
kegg_ko	K01945	Nucleotide metabolism | Pyrimidine metabolism | De novo purine biosynthesis, PRPP + glutamine => IMP (24) (complete 8/8)			0	0	5.45745e-05	2							0.000469482	2															9.16333e-05	1							2.15605e-05	1	0.000210149	3			0	0
kegg_ko	K01952	Nucleotide metabolism | Pyrimidine metabolism | De novo purine biosynthesis, PRPP + glutamine => IMP (24) (complete 8/8)					0.000564412	4			0.00114245	4							0.000109089	1	0.00146119	5									7.50121e-05	1			0.000100439	1	0.00021533	3	1.57714e-05	1	0	0	5.94708e-05	2			4.15314e-05	1	0.000495427
kegg_ko	K01962	Lipid metabolism | Lipid metabolism | Fatty acid biosynthesis, initiation (14) (complete 2/2)
kegg_ko	K02003										0.000605306	2											8.94082e-05	1											4.08283e-05	1							3.36446e-05	1			8.08273e-05	2
kegg_ko	K02039																0.000116749	1
kegg_ko	K02073																																				2.73731e-05	1					2.41916e-05	1					2.35365e-05
kegg_ko	K02078	Biosynthesis of other secondary metabolites | Biosynthesis of other bacterial compounds | Aurachin biosynthesis, anthranilate => aurachin A (3) (incomplete 2/8)	0.0133221	39	0.0189299	74	0.0201494	54	0.0156613	56	0.0156974	35	0.00963469	41	0.0194291	52	0.0150797	45	0.00835897	37	0.019232	39	0.0140191	45	0.015097	32	0.0101698	51	0.0101367	44	0.0198868	34	0.0169256	56	0.0185631	48	0.0119676	56	0.00979991	38	0.0185333	57	0.0151	83	0.0105338	44	0.01793	60	0.0149925
kegg_ko	K02110	Energy metabolism | ATP synthesis | F-type ATPase, prokaryotes and chloroplasts (8) (complete 1/1)	0.00244503	8	0.00423722	13	0.00607694	18	0.00640671	17	0.001376	7	0.00115287	9	0.00131061	5	0.00260439	8	0.000271254	3	0.00534573	12	0.00288088	9	0.00127566	5	0.00264891	12	0.00176563	10	0.0249149	22	0.00152884	8	0.00137097	11	0.00163656	8	0.00127345	4	0.00314901	9	0.00144901	12	0.00363926	12	0.00107583	5	0.00657131
kegg_ko	K02117	Energy metabolism | ATP synthesis | V/A-type ATPase, prokaryotes (9) (complete 1/1)					3.37636e-05	1							0.000103831	1			1.06543e-05	1									1.07516e-05	1													4.01281e-05	2
kegg_ko	K02118	Energy metabolism | ATP synthesis | V/A-type ATPase, prokaryotes (9) (complete 1/1)			1.87039e-05	1																									0	0	8.75016e-05	2	0	0									0.000213676	1
kegg_ko	K02133				2.6586e-05	1	0.000203788	1					0.00114062	6																	0.00117479	2			0	0			3.61734e-05	1			0.000144231	2	0.000383466	2	0.000104524	1	2.1954e-05
kegg_ko	K02190	Metabolism of cofactors and vitamins | Cofactor and vitamin metabolism | Cobalamin biosynthesis, anaerobic, uroporphyrinogen III => sirohydrochlorin => cobyrinate a,c-diamide (21) (complete 11/11)	0.000747713	3	5.63778e-05	1	3.21831e-05	1	0.000388664	1	8.4846e-05	1	8.53955e-05	2	0.00107816	5	0.000231816	3					0	0	0	0	0.000415293	4	0	0	0.0072486	5	0.000237714	2	0	0			0.000436946	3	0.000141432	2	7.7817e-05	2	0.000104473	2	0.000263509	2	5.78553e-05
kegg_ko	K02221																														0.000266363	1
kegg_ko	K02315
kegg_ko	K02340
kegg_ko	K02355		0.000730983	3	0.000434415	5	0.000653254	9	0.000388869	4	0.000596045	4	0.000344693	7	0.00089114	6	0.00162426	9	1.85654e-05	1	0.000724197	4	0.000295252	2	0.000333896	4	0.000712898	6	0.000261063	2	0.00140335	6	0.00139782	6	0.000439533	2	0.000728553	8	0.000974149	7	0.000707616	9	0.000596716	9	0.00122013	8	0.00087264	4	0.000751977
kegg_ko	K02356				0.000596523	3	0.000493078	3	5.74894e-05	1	6.09767e-05	2			0	0	0.000480848	2	4.48679e-05	1					7.9351e-05	1			0.000521815	2	0.00160984	3	4.93389e-05	1			0.000285997	2	0.00012124	2	0.000443454	1	0.000105803	2	2.96058e-05	1			0.000368641
kegg_ko	K02357		0.0013189	5	0.000304837	1	0.000361534	4	0.000176708	1			0.00012326	2	0.000108985	2	0.000770739	6			0.000169785	2	0.000658003	5	0.000146478	2	0.000817197	6			0.000144905	1	9.78134e-05	1	0	0	0.000152202	3	3.06993e-05	1	0.000399485	6	0.000133307	4	0.000416574	5	0.000181834	2	0.000177241
kegg_ko	K02358		0.00197347	6	0.00117372	9	0.00601933	12	0.00247723	5	0.00153271	6	0.003954	7	0.00353246	11	0.0010734	5	0.00140442	7	0.000552134	3	0.00114142	5	0.000490139	3	0.0116086	15	0.0020884	5	0.0105485	3	0.000389019	1	0.000463043	1	0.00168882	7	0.00229143	10	0.00174749	9	0.00397669	14	0.00772282	8	0.00102265	4	0.0117126
kegg_ko	K02390																														5.17647e-05	1									4.53338e-05	1
kegg_ko	K02406		0.000236515	4			0.00075212	2			0.000803786	1	0.000106189	2	0.000468177	1									0.000301533	3	0.00279824	8	0.000866157	1							0.000162647	2							7.59344e-05	1
kegg_ko	K02518		0.00310212	19	0.00472302	36	0.00235628	22	0.00444963	32	0.00189257	12	0.00435041	38	0.00262181	21	0.00135103	15	0.0038747	32	0.00159916	10	0.00138829	12	0.00286699	18	0.00182265	17	0.00299877	24	0.000906623	5	0.0034085	31	0.00271728	23	0.0035356	39	0.00295318	28	0.00311762	27	0.00549078	46	0.00191052	19	0.00249639	22	0.00260999
kegg_ko	K02590
kegg_ko	K02612	Xenobiotics biodegradation | Aromatics degradation | Phenylacetate degradation, phenylaxetate => acetyl-CoA/succinyl-CoA (11) (complete 7/7)																			0.00262124	3	4.07913e-05	1																			0	0
kegg_ko	K02666
kegg_ko	K02760				3.59582e-05	1			0.00036146	3			0.00116044	7	0.00197832	6	0.00130503	5	0.00195325	5	0.00192346	5	0.000766584	3	0.00126545	5			0.000537631	5	0.000503356	1					0.00117757	5					0.000409123	4	0.00261111	10			0.0019152
kegg_ko	K02784		0.0505782	100	0.0347735	122	0.0290179	110	0.016611	73	0.0655316	128	0.0391937	146	0.0489395	107	0.045312	101	0.0232273	87	0.0185494	37	0.0316835	103	0.0585432	122	0.0284272	103	0.0352285	103	0.0315986	51	0.0450643	122	0.029462	125	0.0445426	157	0.0403091	115	0.0449881	137	0.031612	135	0.0321248	114	0.0475189	137	0.0593704
kegg_ko	K02793														5.40517e-05	2																			0.000290607	3											0.000129782	1
kegg_ko	K02794												7.47672e-05	1	0.000129639	3			6.30867e-05	1																			3.90208e-05	1									4.92293e-05
kegg_ko	K02803																												2.47903e-05	1
kegg_ko	K02822	Carbohydrate metabolism | Other carbohydrate metabolism | Ascorbate degradation, ascorbate => D-xylulose-5P (7) (complete 5/5)	0.000414489	4	0.000307745	5	0.000272544	4	7.59476e-05	1	2.26796e-05	1	0.000295919	5	0.000375278	4	0.000146324	3	0.000323934	4	0.000632645	4	0.0002008	1	0.00103676	8	0.000238124	4	0.000353765	8	0.000300719	2	9.45543e-05	4	0.000104676	3	0.000324199	5	0.000213028	3	4.74731e-05	1	0.00049335	7	0.000288418	3	0.000286742	6	0.000493328
kegg_ko	K02834		9.6449e-05	1											9.87784e-05	1																															2.32106e-05	1
kegg_ko	K02863		0.000517851	3	0.000194818	2	0.000451572	7	0.000704338	6	0.00606368	12	0.000920051	4	0.000485137	4	0.000412503	4	0.00097123	4	0.000314711	1	0.000942692	4	0.000526739	3	0.000419305	3	0.000344882	3	0.000476618	3	0.000226026	3	0	0	0.000381138	6	0.000568799	5	0.000398834	5	0.000537377	3	0.000444828	2			0.00110551
kegg_ko	K02867		9.77026e-05	1	0.000258641	4	0.000240807	1	0.000146014	2			0.00176809	8	0.00036587	5	0.00158637	2	0	0			0.000582592	3	0.00118282	2	0.000106628	1	0.000638366	4	0.00165716	1	0.000140717	1	3.96663e-05	1	5.43917e-05	2	0.000121212	3	0.000681213	10	0.000656535	7	0.000315434	4
kegg_ko	K02869																																								4.36737e-05	1
kegg_ko	K02871		0	0	0.00109619	8	0.000399527	3					0.000561659	3	0.00121362	4	0.00177075	7	0.000690477	4	0.000129002	1	0.000117364	1	0.000103822	2	0.000929034	3	0.000145613	1	0.000202006	1	0.00034811	2	0	0	0.00011819	1	0.000214923	2	0.000189424	5	0.000230824	4	0.000362276	5	0.00219971	10	0.000444896
kegg_ko	K02876		0.000856448	2	0.000992159	3	0.00045341	6	0.0014541	4			0.000380835	3			0.000560864	4	0.000749827	7	0.000667697	6	0.000360296	4	0.00130571	5	0.000149685	4	0.000262278	3	0.000370741	3	0.000169321	6	0.00011919	3	0.00013684	2	0	0	0.000213967	4	0.000909062	11	6.38364e-05	2	0.000374916	4	0.000152408
kegg_ko	K02878		0.000129931	1	0.000331237	2	0.000412803	3	0.000266418	2	0.000901441	3	0.000152621	1	0.000701722	4	0.000373357	6					0.000467602	2	0.000189374	3	0.00021196	2			0.000415103	1	0.000906917	4	0.000581409	3	2.60693e-05	1			0.000321672	2	0.000368405	5	4.49991e-05	1	0.000384065	4	0.000313961
kegg_ko	K02879		0.00026377	3	0.000233961	1	0.00137185	11	0.00104108	6	0.000158373	2	0.0004738	4	0.00191601	15	0.000367292	5	0.000197741	2	0.000216879	1	0.000832453	3	0.00179576	5	0.00172606	8	0.000651959	2	0.00188845	6	0.00018157	2	0.00112958	5	0.000359559	3	0.000437316	6	0.000316692	2	0.000651351	6	0.000869252	8	0.00151481	7	0.000885788
kegg_ko	K02881		0.000173516	3	0.000342709	3	0.000205941	2	0.00044775	3	3.88325e-05	1	0.000425538	3	0	0	0.00148317	4							0.000471131	2	0.000433749	5	0.000743071	3	0.000145378	1	0.000811525	4	4.4391e-05	1	3.39222e-05	1			0.00322218	6	0.000328524	4	0.000528812	4	0.000365234	2	8.79276e-05
kegg_ko	K02884				0.000219112	1	0	0	9.3345e-05	1											3.15006e-05	1	0.00127395	2							0.00135302	2					0.000143426	2	0.00012734	2	0	0	0.000120313	1			0.000177419	1	5.1117e-05
kegg_ko	K02886		0.00131962	2	0.000604344	2	0.000679461	1	0.00077367	5	0.000474852	3	0.00060988	3	5.41596e-05	1	0.00137566	2	0.00103678	5	0.000669642	2	0.00222813	7			0.000934413	3	0.00150973	2	0.00160613	2	7.3616e-05	1	0.000208445	3	0.000906003	5			0.00102167	2	0.000731472	4	0.00170035	3	0.000319592	5	0.000564945
kegg_ko	K02887		0.000128537	2	0.000193671	4	0.000345078	5	0.000811727	6	0	0	0.000912108	8	0	0	5.33518e-05	1	0.000491353	6	0.000965184	3	0.000204378	2	3.15676e-05	1	0.000423403	3	0.00180007	6	9.88221e-05	1	0.000108053	2	0.000185115	2	0.000395622	5	0.000502101	4	0.000470888	5	0.000266406	5	0.000273526	3	0.000287856	4	7.29263e-05
kegg_ko	K02889																				0.00181554	4					0	0											7.85335e-05	1	7.28495e-05	1	2.20124e-05	1
kegg_ko	K02890		0.000150443	2	0.000433171	5	0.000579243	5	8.90746e-05	1	0.000200216	2	0.000161712	3			0.000337166	2	0.00188206	5			0.000636155	3	4.19359e-05	1	0.000248194	2	3.3249e-05	1	0.0014409	3							3.47767e-05	2	0.00149359	6	5.19977e-05	2	2.53955e-05	1	0.000224934	3
kegg_ko	K02892		0.0465566	136	0.0604534	201	0.041746	158	0.0399319	139	0.0713287	160	0.0489	192	0.0546173	142	0.0478093	134	0.0498804	175	0.0433634	117	0.0614751	147	0.0486412	143	0.0626655	177	0.0601581	183	0.0491112	77	0.0551224	161	0.0632487	202	0.0639527	215	0.0437058	158	0.0525474	144	0.0447816	208	0.055018	146	0.0521316	174	0.0645719
kegg_ko	K02895		0.000326106	4	0.00193136	10	0.00364488	15	0.00089052	4	0.000323931	4	0.00095791	5	0.0006162	4	0.00181573	10	0.00431777	12	0.00192991	11	0.000629336	8	0.000567422	5	0.00136527	11	0.0007193	10	0.00289109	8	0.000367805	4	0.00294306	13	0.003358	14	0.00130834	12	0.00297162	6	0.000882612	11			0.000728414	7	0.00108484
kegg_ko	K02899		0.0321889	79	0.0235901	106	0.0280635	103	0.0250058	85	0.035791	85	0.0259547	93	0.026397	70	0.0294483	69	0.0241683	88	0.0198203	68	0.0355088	94	0.0288375	83	0.0259355	84	0.0290314	90	0.0251237	45	0.029814	74	0.0366811	107	0.032892	119	0.0183803	82	0.0215552	74	0.0203112	100	0.0348809	88	0.0319613	101	0.0418766
kegg_ko	K02902		0.013908	30	0.016946	43	0.016665	48	0.0115922	53	0.0177989	37	0.0185731	63	0.0170212	41	0.0101537	27	0.00834858	25	0.0128295	35	0.0223802	51	0.0229062	45	0.0197169	45	0.0136617	44	0.0156072	20	0.0119197	41	0.0192159	51	0.0219525	56	0.0102026	42	0.0152958	49	0.0117651	59	0.0205575	47	0.0175338	52	0.0231563
kegg_ko	K02904		0.00220313	17	0.0047166	48	0.00678878	51	0.0229082	97	0.000490759	7	0.00734444	58	0.00117132	13	0.0008569	13	0.0416243	129	0.00065744	6	0.00243702	19	0.000454244	9	0.00126951	13	0.00193981	20	0.00179849	7	0.00184815	24	0.00264039	28	0.0010859	19	0.00257014	32	0.00130463	17	0.0290267	123	0.00101182	16	0.00121843	12	0.00145447
kegg_ko	K02906		0.00135664	5	0.00206927	7	0.00098682	7	0.00233435	11	0.00152672	5	0.0011292	4	0.00143671	8	0.000527573	5	4.67771e-05	2	0.00154567	6	0.000901484	4			0.00036628	4	0.000386786	2	0.00148745	6	0.000811354	2	0.000259765	1	0.00465946	9	0.000582977	4	0.000312157	3	0.000272519	3	0.000763296	5	0.000790919	6	0.000795643
kegg_ko	K02907		0.0224538	72	0.0326368	105	0.0354387	101	0.0330952	108	0.0172688	45	0.0352148	113	0.0138911	46	0.0131363	47	0.0472153	127	0.0157343	50	0.0189126	67	0.0169113	47	0.0140636	53	0.0184356	68	0.010066	27	0.0236303	81	0.0269291	85	0.0186038	85	0.0174627	98	0.0101826	57	0.0345106	147	0.0142349	64	0.0204025	67	0.0230999
kegg_ko	K02908						0.000135426	3													0.00220342	4	0.000101546	1			0.000206246	2			0.000645478	2											0.000152052	2
kegg_ko	K02909		0.00979804	48	0.0110114	47	0.0130144	45	0.00891641	36	0.0058658	37	0.012469	56	0.00743014	31	0.00488387	29	0.0111198	51	0.0109839	32	0.0112717	37	0.0137652	42	0.00966976	50	0.00959757	42	0.00618909	16	0.00934046	50	0.0126437	47	0.00998116	60	0.0109052	58	0.0103403	57	0.00870827	53	0.0120794	44	0.0108052	47	0.0111493
kegg_ko	K02910						4.051e-05	1													0.00215357	5	0	0			6.71652e-05	1			0	0									0	0	0.000105333	1
kegg_ko	K02911		0.00566717	15	0.00331888	20	0.00264604	14	0.00557789	19	0.00450278	12	0.00265547	14	0.00217107	11	0.00392345	14	0.00815396	26	0.00234803	10	0.005062	20	0.00468374	18	0.00328011	12	0.00226734	13	0.00160002	5	0.00529069	23	0.00475879	22	0.0059246	22	0.00407318	27	0.00467118	23	0.00611939	27	0.00322982	19	0.00517888	24	0.00219251
kegg_ko	K02913		0.0036564	14	0.0024353	17	0.00211981	10	0.00344962	14	0.0026792	9	0.00298009	19	0.00353704	15	0.00241454	13	0.00758986	26	0.00384846	10	0.00416373	14	0.00505391	14	0.00573577	17	0.00293615	15	0.000176327	1	0.00358549	16	0.00584488	18	0.00341501	17	0.00585101	26	0.00515767	16	0.00360076	25	0.00580593	14	0.00640903	22	0.00161155
kegg_ko	K02914		0.000722971	5	0.000316271	3	0.00109231	5	0.000444943	5	0.000670958	2	0.00130343	5	0.000679314	4	0.00105596	2	0.00504276	10	0.000519933	4	0.00132673	5	0.000456879	3	0.000621077	2	0.000794853	4	0	0	0.000201617	3	0.00251163	7	0.00146544	8	0.00026278	4	0.000167793	1	0.00222985	8	0.000762798	5	0.00236036	8	0.000324103
kegg_ko	K02915						0.00103484	4													0.00207666	2					0.000181648	1			0	0											0	0			0.000290109	2
kegg_ko	K02916		0.0155939	57	0.0139699	80	0.0156261	85	0.0098734	59	0.0167366	64	0.0170015	90	0.0184571	59	0.015009	65	0.0209217	89	0.0153207	51	0.0168663	66	0.0143188	54	0.0110322	59	0.0161395	71	0.0088784	18	0.0131095	74	0.0186681	77	0.0174957	91	0.00739939	58	0.0128274	74	0.012585	95	0.0163824	78	0.0167811	76	0.00821929
kegg_ko	K02919		0.00115082	5	0.0014716	7	0.000920824	6	0.00244036	7	0.000144711	1	0.000585219	5	0.000266099	2	0	0	0.0030618	12	0.00118281	4	0.000721941	4	0.000862406	6	0.000324672	2	0.000628566	4	0	0	0.00167694	5	0.00121189	7	0.000729879	4	0.000771089	4	0.00101114	5	0.00195639	11	0.000980888	5	0.000828643	5	0.000502093
kegg_ko	K02926		0.000424822	3	0.000779277	10	0.00131809	10	0.00187153	12	0.000360091	2	0.000440435	4	0.00149397	10	0.00140797	11	0.00189245	14	0.000165777	1			0.00211291	12	0.000874791	10	0.000435293	3	0.00312085	8	0.000244823	3	2.91312e-05	1	0.00165815	12	0.00692597	16	0.00544222	18	0.00121268	9	0.000852658	8	0.00123979	8	0.00200853
kegg_ko	K02929						7.58193e-05	1													0.00113291	1	0.000123958	1			7.93326e-05	1			0.000358807	1											7.42433e-05	1
kegg_ko	K02935		0.000296525	3	0.00123559	3	0.000842671	8	0.00301684	12	0.00739389	13	0.00144716	8	0.00108052	5	0.00158216	4	0.0030458	9	0.000245395	3	0.000362499	2	0.00330134	4	0.00461391	14	0.00208175	8	0.00160197	4	0.000120204	4	0.00171604	2	0.00302352	9	0.000467441	4	0.000370583	3	0.00121043	5	0.000833544	8	0.000484238	4	0.00086554
kegg_ko	K02944						9.78143e-05	1													0.00337368	4	0.000315688	3			0.000249826	2			0.000702927	3									9.70136e-05	1	0.000220646	3					5.52599e-05
kegg_ko	K02945		0.000423477	4	0.00112794	6	0.000852595	5	0.000110471	1	0.00254829	5	0.000945134	5	0.000469504	4	0.000294356	2	0.00104749	6	0.000560036	2	0.00119574	4	0.000365346	2	0.000534027	2	0.0005079	5	0.00223991	6	0.000159346	3	0.00591583	10	0.00101136	10	0.000243323	2	0.000359456	1	0.000108619	1			0.000433767	4	0.00139191
kegg_ko	K02948		5.72136e-05	1	6.31832e-05	2	1.44864e-05	1	0.00014732	2	7.30311e-05	1					0.000202077	1			2.19351e-05	1	0.000237437	1			0.00037968	2	2.14035e-05	1	0.000518223	3	0	0	2.0098e-05	1			0.000653082	4	8.56532e-05	1			0	0			0.000386095
kegg_ko	K02950				0.000204013	1	1.6271e-05	1	0.000188201	2			0.00015067	2	0.00014894	1			1.11293e-05	1	0.000303978	1	0.000399109	2	0.000158817	2	0.00136127	1	0.000238477	1					0.00021682	1	0.000190532	1	0.00169188	1	0.000262416	3	0.000303956	2	0.000493455	3	0.000674544	3	0.000656708
kegg_ko	K02954		0.00195293	12	0.00469418	14	0.00756917	15	0.00326137	20	0.00113803	10	0.00318289	20	0.00172922	11	0.00142022	7	0.00533362	17	0.00210279	9	0.00112264	8	0.00180659	12	0.000989117	6	0.00300248	14	0.00258799	4	0.000712299	8	0.00218663	12	0.00648942	16	0.00169426	15	0.00221092	12	0.00168442	13	0.00477606	17	0.00226962	17	0.00335681
kegg_ko	K02956		0.0266768	82	0.0394907	161	0.0336219	128	0.0383602	151	0.0251939	79	0.043771	164	0.0281191	99	0.0250082	86	0.0309387	127	0.0146174	59	0.0377161	105	0.0346904	113	0.0361909	115	0.0310565	114	0.0180819	32	0.0267823	114	0.037967	138	0.0416871	158	0.0197043	93	0.0323071	132	0.0364462	166	0.0368426	127	0.0409033	151	0.0340437
kegg_ko	K02959		0.0151009	46	0.0213553	89	0.0156275	83	0.0201238	63	0.00781558	35	0.015576	78	0.0124737	49	0.0114185	41	0.0204039	72	0.00737389	27	0.011289	47	0.00659787	39	0.00818222	42	0.0166891	57	0.0098262	19	0.0114365	56	0.0133767	61	0.0196986	82	0.0163344	68	0.01446	50	0.016683	95	0.00932312	54	0.0147081	66	0.0150534
kegg_ko	K02961		0.0334262	82	0.038575	116	0.0333882	110	0.0278296	82	0.0513664	75	0.0324616	125	0.0492548	101	0.0499027	98	0.0321574	85	0.0325251	89	0.0554613	126	0.0358269	90	0.0488176	138	0.0258515	95	0.0297735	49	0.036484	95	0.0442014	112	0.0439804	140	0.0363329	135	0.0500684	122	0.0228987	106	0.0401182	119	0.0396608	125	0.0557623
kegg_ko	K02963		0.0268452	59	0.0222842	87	0.0199242	68	0.0224076	81	0.031589	73	0.0323495	118	0.0305554	77	0.027214	69	0.0336115	91	0.0131834	37	0.0243634	73	0.0280234	72	0.0316346	89	0.024319	73	0.0147641	21	0.0181804	65	0.0341968	103	0.0300165	107	0.0204075	73	0.0367806	107	0.026365	116	0.0304036	86	0.0359107	113	0.0209542
kegg_ko	K02965		0.0647889	104	0.0656621	167	0.0750906	162	0.056599	134	0.0498352	87	0.0719715	194	0.0353405	88	0.0348331	61	0.0426001	112	0.0460836	81	0.063505	110	0.0742535	131	0.0408201	113	0.0683116	121	0.0262747	30	0.0645745	141	0.0619565	156	0.0760602	178	0.0565622	148	0.051001	140	0.0499122	195	0.0743544	137	0.0791866	173	0.0512865
kegg_ko	K02967		0.000114275	1	8.78046e-05	1	0.000284571	3			0.000119335	2			0.00042472	3			0.00110075	7							0	0	7.74236e-05	1	0.000144913	2	3.67832e-05	1	8.77706e-05	1	0.000540008	5	0.000647348	4	0.00109106	6							0.000259385
kegg_ko	K02968		0.0153843	66	0.0280055	124	0.025239	115	0.0296804	101	0.0127819	61	0.0296031	144	0.012839	58	0.00668129	48	0.055183	141	0.00750423	37	0.00979408	63	0.0155923	67	0.00759514	54	0.0183871	82	0.00606225	15	0.0210987	85	0.0177792	82	0.0164715	104	0.0183505	83	0.0101486	60	0.0278506	143	0.0127599	62	0.0180262	96	0.00591128
kegg_ko	K02970		0.0092072	27	0.0130886	35	0.0114856	33	0.0165508	46	0.00824514	15	0.00684672	29	0.00510488	22	0.00627046	18	0.0139946	41	0.00397522	14	0.00937062	21	0.0155687	21	0.00507989	14	0.00427324	17	0.00230119	8	0.0064368	20	0.00635461	24	0.010351	36	0.00781241	30	0.00639905	17	0.0102831	47	0.00685842	20	0.0168947	40	0.00656515
kegg_ko	K02979		4.70124e-05	1	2.41972e-05	1	0.000391248	5			5.07938e-05	1									0.000304544	4			8.17982e-05	1	9.07635e-05	1					4.6862e-05	2					4.98542e-05	1			0.000283063	3	5.09053e-05	1			3.53725e-05
kegg_ko	K02982		0.000581733	2	0.00030031	1	0.000192872	1	0.00115307	5	0.000273705	3	0.000183149	2	0.000292522	2	0.000739132	2			0.00021535	1	0.000183958	1					0.00023791	1	0.000592748	2	0.000964018	4	0.000153807	1	0.000480658	6	0.000235356	1	0.000361156	4	0.000106105	3	0.00100438	2	7.53543e-05	1	9.10336e-05
kegg_ko	K02986		9.33635e-05	1	0.000108778	3	0.000350133	4			2.45897e-05	1	0.000501404	1			4.89034e-05	1															0.000135722	1	0	0	0.000942409	1			8.36316e-05	2	0.000398582	4
kegg_ko	K02987								6.57383e-05	1
kegg_ko	K02988		0.00190716	6	0.000817028	4	0.000316924	3	0.00110404	3	0.00245908	2	0.00557039	10	0.00533951	9	0.00419115	15	0.00320126	4	0.00125535	4	0.00312037	7	0.00254882	6	0.00516792	14	0.000199678	2	0.000442469	2	0.00143899	6	0.000524988	3	0.00202869	12	0.00244814	13	0.00213215	4	0.000525583	2	0.000807593	5	0.000311515	4	0.00132139
kegg_ko	K02990		0.0281898	75	0.0257607	110	0.0219716	96	0.0214417	92	0.0252204	73	0.0269964	120	0.0300911	80	0.023373	76	0.0408244	91	0.0137768	58	0.0251752	95	0.0167151	87	0.0238133	98	0.0293819	106	0.018264	33	0.0443291	106	0.0302763	99	0.0287572	115	0.0257624	96	0.0316055	88	0.0239287	113	0.0237336	94	0.0172536	89	0.0364248
kegg_ko	K02992		0.000217814	2	0.000140556	1			0.000244643	2	6.49363e-05	2	0.0013868	4	5.86849e-05	1	0.00269245	5	0.000241921	5			0.000580387	2	0.000116634	2	0.00114121	7			0	0	0.000112679	3	0.000526132	2	0.000133101	2			0.000177536	3	0.00108261	8	0.00208396	5			5.49502e-05
kegg_ko	K02996		0.000318883	1	0.00143916	5	0.000743666	6			7.97201e-05	1					0.000979199	9	0.000406932	1	0.000332089	2					0.000345344	4					8.81106e-05	1	0.000112178	3	0.000341864	4			5.73876e-05	1	6.11638e-05	1	9.79743e-05	1	0.00205784	3	0.00027987
kegg_ko	K03046		2.916e-05	1			0.000676412	7					0.00010255	2	0.000477485	2											0.000697272	4									9.5979e-05	1					4.10494e-05	1	0.000109504	1	0.000224852	2
kegg_ko	K03060		0.00289618	21	0.00306522	30	0.00259523	32	0.00311439	23	0.00462898	25	0.00316536	28	0.0028539	20	0.00377765	24	0.001109	14	0.00146037	8	0.00358858	23	0.00172786	16	0.00236237	20	0.0031826	18	0.00104505	6	0.00272764	21	0.00299375	29	0.00557918	36	0.00217421	24	0.00675228	31	0.0036613	41	0.00423905	22	0.00201451	26	0.00321452
kegg_ko	K03088																		2.63465e-05	1	0.000686178	1													5.84373e-05	1
kegg_ko	K03116		0.000643998	7	0.000376258	10	0.000211087	5	0.000156008	7	0.000447155	9	0.000632352	13	0.000975821	14	0.00161334	17	1.72506e-05	2			0.000228825	5	0.000691224	9	0.000625155	10	0.000393646	10	0.000226792	5	0.000230575	3	0.000503525	9	0.000439492	8	0.000286546	8	0.00103272	17	0.000354734	12	0.000477039	10	0.000576039	10	0.000775837
kegg_ko	K03154	Metabolism of cofactors and vitamins | Cofactor and vitamin metabolism | Thiamine biosynthesis, prokaryotes, AIR (+ DXP/glycine) => TMP/TPP (10) (complete 9/9)	0.000268232	3					4.52323e-05	1	0.00069157	2	0	0					0.000370764	8			0.000276515	2	2.67328e-05	1	0.000146655	2	0.000202575	4			0.000454047	3	0.000300699	4	0.000118496	2	5.92302e-05	1	0	0	0.000130021	3	0	0			4.79733e-05
kegg_ko	K03210		0.000712431	5	0.000600568	8	0.000451892	6	4.60865e-05	1	0.000865685	5	0.000855639	10	0.000187166	2	0.000439049	5	5.29288e-05	2	0.000353622	1	0.000247395	3	0.000639073	4	0.000257142	3	0.000341363	3	0.000652915	1	8.73366e-05	2	0.000195953	2	0.000174928	4					0.000174143	2	0.000191324	3	0.000306361	6	0.000327942
kegg_ko	K03232						4.46664e-05	1													0.00161253	6			0.000188585	1	9.30691e-05	2											0.000214561	1	3.65308e-05	1	5.57346e-05	1					1.9605e-05
kegg_ko	K03431	Glycan metabolism | Other polysaccharide metabolism | UDP-MurNAc biosynthesis, Fru-6P => UDP-MurNAc (5) (complete 5/5)							0.000224489	1							0	0					0.000217129	1					3.9022e-05	1	0.000102267	1	1.71224e-05	1					0.000168134	2					0.000131619	2
kegg_ko	K03521				5.53489e-05	1	0.00028349	2									0.00105257	2					0.000126033	1							8.94348e-05	1					1.15708e-05	1					0.000470129	2			1.68449e-05	1	0.00131315
kegg_ko	K03530		0.0502693	150	0.0785201	277	0.0760919	266	0.100747	298	0.0353417	150	0.0998821	387	0.0575834	179	0.0302601	130	0.0978289	299	0.0712687	183	0.0378904	185	0.0347345	171	0.054484	196	0.0394482	164	0.0219168	73	0.0830312	263	0.0651819	225	0.0533619	271	0.101928	347	0.0474676	227	0.105422	396	0.0491308	187	0.0553096	250	0.0325283
kegg_ko	K03531																2.39334e-05	1					0.000236116	2	5.58426e-05	1	0.000313226	3			7.99139e-05	1							1.64007e-05	1			5.83241e-05	1	1.50272e-05	1	2.66935e-05	1	0.000115307
kegg_ko	K03545				5.97944e-05	1	0	0							0	0	9.70282e-05	1	4.86359e-05	1			0	0	0.00010498	2					0.0004056	2					2.98404e-05	2	0	0			5.53227e-05	1	0.000147764	2	0.000113278	3	4.02468e-05
kegg_ko	K03559
kegg_ko	K03563		0.000227188	2	0.000380967	6	4.22567e-05	1			0.000307095	2	7.43271e-05	2	0.000321611	4	0.000724054	6	0.000168313	6			0.000461269	2	0.000254583	2	0.000269974	3	0.000224585	3	0	0	0.000716553	6	0.000788466	5	0.000119657	2	0.000105075	2	0.000501299	5	0.000178849	2	0.000412814	5	0.000209865	3	7.55045e-05
kegg_ko	K03608		6.72998e-05	1	7.57708e-05	2	0.000150646	2			0.00032901	3	6.67438e-05	2	6.58329e-05	1	0.000507004	3	0.000218622	2			5.70819e-05	2	6.81193e-05	1	0.000230805	1	0.000225897	3			4.17513e-05	1	0.00027698	6	0.00078713	7	0	0	0.000929879	4	4.85223e-05	1	0.000459431	4	2.35868e-05	1	0.000146947
kegg_ko	K03616																		4.74852e-05	1			2.98276e-05	1
kegg_ko	K03623								9.30642e-05	1							4.72425e-05	1																			1.78331e-05	1									3.61533e-05	1
kegg_ko	K03624		0.00019061	1	7.42135e-05	2					4.16965e-05	1	5.95178e-05	2			0.000390467	4	7.36711e-05	3			8.75638e-05	1			5.33068e-05	1	5.34814e-05	1	0	0	0.00393158	5	0	0	0.000447509	4	0.000398547	6	0.000143279	3	0.000225429	4	0.000167395	2	2.29316e-05	1	3.69411e-05
kegg_ko	K03666		0.000322305	3	0.000196137	4	9.3356e-05	3	0.000344902	3	0.000303723	3	0.000658826	3	0.00107128	5	9.42913e-05	2	0.000196791	3	0.00266491	5	0.00142177	7	0.000135961	3	0.00106121	5	0.000239589	3			0.0012418	8	0.00121351	9	0.000141842	2	0.00192123	9	0.000292352	4	0.000891176	7	0.00121643	7	0.000408848	5	0.000445088
kegg_ko	K03671		0.000257913	1	0.000436729	8	0.00023514	5	0.000117343	3	0.000639722	3	0.000634263	7	0.000227033	3			0.000577478	8	0.000238782	3	0.000287962	2	4.16259e-05	1	0.000204662	4			0.000191571	3	0.00034911	5	0.000126416	2	0.000188579	6	0.000178013	4	0.000195638	3	0.000239897	4	0.000270606	4	0.00133338	13	8.75463e-05
kegg_ko	K03704		0.0310029	39	0.0245808	57	0.017739	56	0.0146858	34	0.0340915	57	0.0216537	59	0.0212533	43	0.031632	49	0.0283122	51	0.00984687	23	0.0260281	55	0.0222255	49	0.027609	47	0.0164458	36	0.0254655	27	0.0224944	57	0.0255677	54	0.027848	68	0.0154093	44	0.022144	48	0.0196942	60	0.0231316	46	0.0257168	59	0.0217234
kegg_ko	K03737	Energy metabolism | ATP synthesis | Reductive citrate cycle (Arnon-Buchanan cycle) (40) (complete 10/10)	0	0	0.00100867	5	0.00190923	11	0.000299304	3	0.00638412	8	0.00710075	15	0.00593329	10	0.00512924	9	0.00242261	12	0.00186209	9	0.00607267	14	0.00300127	7	0.00255352	8	0.00292044	7	0.00480147	4	4.1731e-05	1	0.00515611	5	0.00176351	11	0.000763528	6	0.000580201	6	0.0011332	8	0.00265688	8	0.000459607	9	0.000901001
kegg_ko	K03738	Carbohydrate metabolism | Other carbohydrate metabolism | Non-phosphorylative Entner-Doudoroff pathway, gluconate/galactonate => glycerate (7) (complete 3/3)			3.66742e-05	1			2.56771e-05	1																									6.51464e-05	1
kegg_ko	K03785	Amino acid metabolism | Other amino acid metabolism | Shikimate pathway, phosphoenolpyruvate + erythrose-4P => chorismate (14) (complete 4/4)			1.42898e-05	1							0	0	2.56768e-05	1	9.70892e-05	1			0.000137635	2											1.44677e-05	1					0.000151443	3	0.000252282	2
kegg_ko	K03789												0.000190542	1
kegg_ko	K03839		0.000102596	1	0	0	0.000366911	1	0.000163614	1			0.000216563	3	0	0			2.36255e-05	1							5.1179e-05	1	0	0									6.62365e-05	1
kegg_ko	K03840																														0	0															0	0
kegg_ko	K03925
kegg_ko	K03972
kegg_ko	K03977																				6.49469e-05	1
kegg_ko	K04027		0.00272044	10	0.007774	30	0.00522766	21	0.0112132	35	0.00294803	17	0.00371105	22	0.00321995	20	0.00416611	14	0.00299703	17	0.0172069	22	0.00303914	15	0.00198176	12	0.00524423	19	0.00228476	17	0.00847472	19	0.00488542	26	0.0052246	18	0.00263674	19	0.00377313	17	0.00298446	18	0.00398851	27	0.0054421	24	0.00583558	25	0.00638698
kegg_ko	K04077		0.00205243	8	0.000494203	6	0.000125949	3	0.000174175	1					0.000638328	3	0.000592456	8			7.91587e-05	1	0.00118903	8			2.50265e-05	1			0.00200043	8	0.000328671	2			8.47127e-05	4	6.76908e-05	2	0.000150577	3	4.10937e-05	1	0.000132273	2	0.000405527	1	0.000302206
kegg_ko	K04078		0.102522	200	0.0573974	206	0.03583	194	0.0609891	202	0.0858892	184	0.0505178	181	0.0863767	183	0.106408	216	0.0703672	182	0.073206	176	0.077224	183	0.0527248	137	0.0623613	177	0.0710568	187	0.103791	153	0.0653004	206	0.0733034	184	0.0762485	238	0.0602413	190	0.0797268	199	0.0329207	148	0.0602298	174	0.0648109	199	0.0885454
kegg_ko	K04085		0.000224603	4					9.19383e-05	2	7.65914e-05	2	1.65016e-05	1					0.000168247	7			0.000190147	2	3.67498e-05	1	0.000210176	4					0.000180492	3	0.000200839	3	0.000171342	4	8.14054e-05	2	0.000155963	3	0.000124081	2	0.000172089	3	0.000222347	4	4.22968e-05
kegg_ko	K04488																																						3.02947e-05	1
kegg_ko	K04749		0	0					6.17925e-05	1	0.000176968	1															3.61833e-05	1					3.94731e-05	1	0.000158471	1							2.17909e-05	1			0	0	0.000136323
kegg_ko	K04751																																		7.4953e-05	1											0.000145576	2
kegg_ko	K04752				1.80107e-05	1											4.95853e-05	2									0.000493234	3	0.000101983	1					7.4953e-05	1											0.000145576	2
kegg_ko	K04758		0.0278672	49	0.0291476	72	0.0185909	66	0.050599	91	0.055152	91	0.055726	147	0.0480229	85	0.0607494	88	0.0133751	58	0.0104771	25	0.00639854	24	0.0364456	70	0.0284775	63	0.0283291	75	0.0324556	33	0.0430574	99	0.0272231	72	0.0411129	107	0.0299201	85	0.0235199	60	0.0391418	118	0.0383268	86	0.0289609	76	0.0303176
kegg_ko	K04762		0.000301719	3	0.000224722	4	0.000164302	2	1.39785e-05	1	0.000778861	7	0.000288202	5	0.000333659	4	0.00029006	4	0.000477085	4	3.40853e-05	1	0.000247615	2	0.000135365	1	0.000498588	6	0.000105558	2	2.35406e-05	1	0.000535753	9	0.000511144	5	0.000395843	7	0.000323491	2	0.000110855	3	0.000167183	5	0.000216231	4	0.000504644	6	0.000137648
kegg_ko	K04796																				0.00458168	6	0.00016525	1			0.000274268	2			0.000398421	1									0.000121372	1	0.000209482	2
kegg_ko	K05230		0.000246748	1	0.000433158	1	0.000675763	1	0.00255798	1	5.67988e-05	1	0.000479807	1	8.86781e-05	1	0.000165931	1	0.000712414	1	0.00426949	1	0.000484225	1	0.000479855	1	0.000183679	1	0.000241902	1	0.000361382	1	0.000467145	1	0.000201749	1	5.20635e-05	1	0.00108121	1	0.000137512	1	0.000840586	1	0.000343006	1	0.000422261	1	0.000176012
kegg_ko	K05685
kegg_ko	K05787		0.000663342	6	0.00122464	3	8.28903e-05	2	0.00018906	1	0.000362834	3	0.000700167	8	0.000152884	2	6.02878e-05	1			0.000190861	2	4.13189e-05	1	0.000312477	3	0.000454011	3	0.000293642	3	9.17626e-05	1	0.000950441	5			0.000837905	8	0.000197951	4	0.000311563	3	0.00201381	4	0.00017232	2	0.000122555	1	0.000404709
kegg_ko	K05788				6.10958e-05	2	5.60747e-05	1					7.18083e-05	2	5.50741e-05	1	0.00011452	2	1.93494e-05	1	0.000752371	4			0.000111578	1	0.000157267	2					5.1395e-05	1	3.78879e-05	2	0.000108618	3	0.000165056	3			7.76348e-05	2			4.94062e-05	2
kegg_ko	K05808		0.00392858	17	0.00702688	22	0.0214331	34	0.00299057	19	0.00084759	8	0.00684425	28	0.00324347	12	0.00208006	11	0.00414705	23	0.00622682	23	0.00945468	23	0.00568457	20	0.00912548	29	0.00168952	16	0.00342256	11	0.00326587	19	0.00947148	24	0.00527406	27	0.00872355	33	0.0087438	27	0.00733609	37	0.00483203	18	0.00459459	25	0.0132638
kegg_ko	K05919		0.000208379	4	9.16348e-05	3	0	0			0.000100828	1	0	0	0.00154004	6	0.00059304	4			0.000351801	3	0.000329198	1			0.00083404	2			0.00117482	2	0.000110094	1	4.52389e-05	2	0.000227816	3	0.00251015	5	0.00151027	2	2.63695e-05	1	0.000142071	1	1.04033e-05	1
kegg_ko	K06218		0.000604228	3																																							3.91425e-05	1	8.67489e-05	1	0.000130692	2
kegg_ko	K06284		0.00366832	14	0.0021928	13	0.00171989	9	0.000942698	5	0.00486223	10	0.00468701	10	0.00563427	15	0.00144564	8	0.00357364	13	0.00376024	10	0.00141715	5	0.00558642	12	0.0024831	10	0.00357473	11	0.00263854	7	0.0109988	28	0.0027459	10	0.00225693	10	0.0130989	33	0.00300933	13	0.0041479	22	0.0087898	17	0.00294356	18	0.00281732
kegg_ko	K06378		0.000412407	4	0.000142278	2			0	0	2.00146e-05	1	0.000110941	1	3.35704e-05	1	0.000188319	2	9.88948e-05	2					3.83478e-05	1	0.000207903	3	5.75474e-05	1			0.00061768	5	0.000153371	1	9.12271e-05	3	4.53414e-05	1	0.000209503	3	0.000308899	3	0.000197874	3	0.000680676	4	0.000120252
kegg_ko	K06412		0.0197277	34	0.00647889	24	0.00655721	23	0.00728402	19	0.0194549	32	0.00667268	28	0.00714622	21	0.0191582	47	0.0058871	34	0.0284001	36	0.0148078	26	0.00748374	22	0.0123529	37	0.00881613	22	0.00528025	10	0.00517483	21	0.0147223	39	0.0120983	37	0.0164357	47	0.0176117	49	0.00793331	38	0.0108006	28	0.00606969	19	0.0112588
kegg_ko	K06416		0.000598742	6	0.00032719	3	0.000878182	4	6.93229e-05	2	0.00014854	2	0.000739388	6	0.000580091	4	0.000105007	2	7.69581e-05	3	0.000101204	2	0.00272927	8	2.84731e-05	1	0.00187958	7	7.99903e-05	3	0	0	0.00154758	8	0.000635509	5	0.000746265	7	0.00127314	5	0.000522181	7	0.000804959	7	0.00330192	14	0.00029474	3	0.0003947
kegg_ko	K06595																																4.04212e-05	1
kegg_ko	K06942		7.1403e-05	1																																													0.000460987
kegg_ko	K06952
kegg_ko	K06960		0.00275733	20	0.00219693	25	0.00213127	20	0.00108328	13	0.00260759	21	0.00169961	20	0.00322882	20	0.00501614	22	0.00261222	27	0.000982853	9	0.0030143	21	0.000982386	11	0.00351263	29	0.00288823	21	0.00129933	4	0.00284638	25	0.0013848	16	0.00292436	23	0.00145453	16	0.00348699	15	0.0030229	25	0.00160155	16	0.00162421	17	0.00345355
kegg_ko	K06971
kegg_ko	K07005		5.68027e-05	1													0.000545576	1																	0.0010645	1
kegg_ko	K07030		0.000495855	3	0.000152713	1	0.000114486	3	0.000377092	2	0.000306161	3	0.000288259	4	0.000288028	4	0.000479758	4	4.99699e-05	1			0.00182188	6	0.000368878	3	0.000189478	2	3.40161e-05	1			0.00036689	6	0.000254344	2	0.000565555	4	0.000164535	4	0.00113172	4	0.000160095	2	9.58536e-05	3	0.000460786	5	0.000228865
kegg_ko	K07045				5.33945e-05	1											8.75289e-05	2																							2.46027e-05	1
kegg_ko	K07166		0.00233203	14	0.00313719	23	0.00370384	15	0.000505731	5	0.0023162	17	0.00179571	13	0.00207244	15	0.00289809	16	0.000706845	6	0.000455803	2	0.00263071	17	0.00202063	17	0.00296668	14	0.00276163	17	0.00366738	10	0.00314963	21	0.00308013	21	0.0024272	16	0.00108619	14	0.00255359	21	0.000947487	14	0.00205623	18	0.00284692	21	0.00486222
kegg_ko	K07213		0.00046662	8	0.000366862	10	0.000100833	3	0.00112869	14	0.000831734	15	0.000350313	7	0.00107752	14	0.000760539	12	0.000354113	8	0.000515157	6	0.000251368	5	0.000497227	9	0.000537373	8	0.000311538	9	0.000284639	4	0.00108846	19	0.000274956	7	0.00046225	12	0.00101852	20	0.000253863	6	0.000635948	14	0.000628872	8	0.000517622	12	0.000951585
kegg_ko	K07319
kegg_ko	K07335						0.000156183	1					0	0							0.000104352	1					6.87988e-05	1	1.70585e-05	1	0.00671474	6	0	0							5.18876e-05	1
kegg_ko	K07574		0.00101858	14	0.00217472	34	0.000727103	14	0.00135598	14	0.000627901	9	0.00268123	38	0.00104863	15	0.000853666	11	0.00281017	37	0	0	5.35927e-05	2	0.000316493	7	0.00016482	4	0.00127533	18	3.02065e-05	1	0.00121073	26	0.000633966	12	0.00129057	23	0.00144438	24	0.00101354	18	0.00138396	30	0.00102631	16	0.000713087	13	0.000703501
kegg_ko	K07668				5.04295e-05	1																	5.63962e-05	1			4.79669e-05	1
kegg_ko	K07706
kegg_ko	K07726				9.03266e-05	2					0	0																											5.35764e-05	1					4.41741e-05	1
kegg_ko	K07729		2.0579e-05	1	0.00016542	3	2.24991e-05	1			2.53906e-05	1	0.00010258	3	3.51316e-05	1	0.000194708	1	0.000439893	3									3.90578e-05	1			0.00374513	4					3.82003e-05	1	4.09619e-05	2	0.00145071	5	0.000186846	2	0.000182785	1
kegg_ko	K08264	Energy metabolism | ATP synthesis | Methanogenesis, methylamine/dimethylamine/trimethylamine => methane (23) (complete 4/4)																															0.000968433	5	0	0							0.000204447	1
kegg_ko	K08364		0.000127335	1	4.17011e-05	1	9.78505e-05	1	0.00077965	6	0.00024981	3	0.00071551	7	0.000164238	2	0.000114202	1	2.51963e-05	2			7.70074e-05	1	0.000453739	3	0.00104853	8	0.000193874	3			7.83857e-05	1	0.00021078	4	0.000217679	3	0.00022404	5	0.000187095	3	0.000792593	7	0.000253702	4	0.000282664	3	0.000829517
kegg_ko	K09721																				0.000485118	4																			3.90446e-05	2	0.000152414	4
kegg_ko	K09777		0.000199723	3	7.50873e-05	2					0.000129095	2	0.000216847	3	0.00013799	3	0.000633037	6	2.93369e-05	2	0.000106264	2	0.00237797	3	3.89366e-05	1	0.000349864	4	3.39095e-05	1	0.00018093	2	0.000304947	5	4.29818e-05	2	0.000315337	6	0.000312736	5	0.000382401	4	0.000134984	3	0.000338548	4	0	0	0.000112421
kegg_ko	K09888				0	0																	2.40451e-05	1									1.42453e-05	1									3.62269e-05	1
kegg_ko	K09988																																5.75664e-05	1
kegg_ko	K10188										5.17757e-05	1
kegg_ko	K10439										7.68095e-05	1					0.000104781	2					6.2594e-05	1									1.3395e-05	1							8.70949e-05	1	0.000125152	1
kegg_ko	K10540						0.000235959	3	0.000137446	2	0.000915114	5	0.0010788	3	4.2431e-05	1	5.03671e-05	1	0.00128429	3							0.000843834	7	0.0010834	6	0.00117862	3	0.000343835	3	1.52238e-05	1	0.000169946	2	0.000510529	7	0.0005279	3			2.7398e-05	1	0.000511293	2	0.000244007
kegg_ko	K10555
kegg_ko	K10709										0.000343516	2											0.000132567	1	7.40658e-05	1			2.25065e-05	1
kegg_ko	K10793
kegg_ko	K10820																				4.37703e-05	1					9.47041e-05	1											0.000100344	2
kegg_ko	K10907																						5.93304e-05	1
kegg_ko	K11176	Nucleotide metabolism | Pyrimidine metabolism | De novo purine biosynthesis, PRPP + glutamine => IMP (24) (complete 8/8)															2.28706e-05	1	2.79011e-05	1			0.000148074	3							0	0	2.73887e-05	1					0.000159125	1
kegg_ko	K11180	Energy metabolism | ATP synthesis | Dissimilatory sulfate reduction, sulfate => H2S (10) (1 block missing 3/4)
kegg_ko	K11184		0.0436806	56	0.025064	87	0.0336893	67	0.0194211	39	0.0470171	43	0.0253506	63	0.0300288	41	0.0443537	59	0.0205676	41	0.0209039	31	0.0362606	64	0.0406514	45	0.0308522	68	0.0229436	43	0.0241485	22	0.035388	66	0.0335749	64	0.0248908	80	0.0248938	61	0.0280863	65	0.0237883	75	0.0335283	61	0.0423732	76	0.02065
kegg_ko	K11189		0.00899993	22	0.00387025	23	0.00571584	20	0.00398593	18	0.0115079	23	0.00853394	36	0.0122631	24	0.011576	25	0.00422584	18	0.00398349	7	0.00446223	20	0.00555353	23	0.00774819	26	0.00847876	29	0.00478073	10	0.0114324	31	0.00605629	25	0.00601832	31	0.00369814	16	0.00810097	26	0.00530479	27	0.00837094	31	0.00644427	27	0.0117407
kegg_ko	K11530		0.00141334	7	0.001681	9	0.000410828	2	0.00150465	6	0.0017364	7	0.00175142	10	0.00435875	11	0.000570305	3	0.0010935	6	0.00257233	9	0.00177532	8	0.000749319	6	0.000808663	4	0.000800003	7	0.000155622	2	0.000911613	9	0.00388526	11	0.000618117	4	0.00224295	13	0.000906065	7	0.000905943	6	0.000644931	6	0.00253927	13	0.000301514
kegg_ko	K11752	Metabolism of cofactors and vitamins | Cofactor and vitamin metabolism | Riboflavin biosynthesis, plants and bacteria, GTP => riboflavin/FMN/FAD (15) (complete 7/7)	0.000111053	2
kegg_ko	K12941
kegg_ko	K12978
kegg_ko	K13052								2.16224e-05	1
kegg_ko	K13607								8.03554e-05	1	9.5274e-05	2			0.000200011	2													0.000134528	2									2.42025e-05	1							0.000205183	3
kegg_ko	K13889						0	0	8.35154e-05	1					0.000267294	1																													0.000295648	3
kegg_ko	K13907		0.000607557	6	0.00272204	8	0.00150533	6	0.00249183	8	0.00176595	8	0.000218841	3	0.000957686	8	0.000171546	1	0.000167227	4	0.00444352	9	0.00099224	6	0.00135854	7	0.000283863	5	0.000547082	6	7.66207e-05	1	0.00103608	7	0.000417478	4	0.000360043	4	0.00101852	5	0.000367188	5	0.000397702	5	0.00101686	7	0.000823377	6	0.000360198
kegg_ko	K13922																																						0.000110552	2									0.000228368
kegg_ko	K13923
kegg_ko	K13993		0.000185927	1	0.00268819	14	0.00323493	4	0.00138599	7	0.000223482	3			0.00138012	9	0.000618897	5	7.34801e-05	3	0.00614413	7	0.00274641	10	0.0107521	7	0.00522472	12	5.2664e-05	1	0.000815087	3	5.04756e-05	1			0.00207182	11	0.000149748	2	0.00123974	9	0.000698998	8	0.0017329	13	4.03688e-05	1	0.00146191
kegg_ko	K14138	Energy metabolism | ATP synthesis | Reductive acetyl-CoA pathway (Wood-Ljungdahl pathway) (16) (complete 7/7)	5.69956e-05	1	0.000545718	3					0.000649719	4	0	0	0.00271732	6	0.00130786	3			0.000228639	1			2.77895e-05	1			2.70224e-05	1			0.000579539	5	0	0	0.000129573	1	0.000143983	3	0.000380905	4	0.000632285	4	0.00016087	2			0.000293485
kegg_ko	K14170	Amino acid metabolism | Other amino acid metabolism | Tyrosine biosynthesis, chorismate => arogenate => tyrosine (6) (complete 3/3)	2.53283e-05	1	3.02088e-05	2	1.45027e-05	1			3.44919e-05	1	1.73286e-05	1					4.43123e-05	2			9.55138e-05	1					7.88827e-05	3									4.86964e-05	1	0.000118622	1	9.58254e-05	2
kegg_ko	K14188	Gene set | Symbiosis | Cationic antimicrobial peptide (CAMP) resistance, dltABCD operon (6) (complete 3/3)	8.14036e-05	1	7.254e-05	1	9.11086e-05	1			0.000213293	1	1.48813e-05	1	7.83675e-05	1	7.84332e-05	1	0	0			0.000661525	4									0.00110744	1	8.68628e-05	1	5.09577e-05	1					6.89152e-05	2			7.2324e-05	1	0.00011631
kegg_ko	K14761		0.00162479	15	0.00122514	21	0.00053284	9	0.000253872	3	0.00202163	12	0.00107592	16	0.000902784	9	0.00176965	13	0.00162019	18	0.00026886	3	0.000210504	2	0.00113589	14	0.00087979	13	0.000721797	11	0.000471841	1	0.00126371	15	0.00120181	15	0.00141587	17	0.000825189	9	0.00134833	15	0.000949874	16	0.000997685	12	0.00103987	12	0.000663285
kegg_ko	K15024	Energy metabolism | ATP synthesis | Phosphate acetyltransferase-acetate kinase pathway, acetyl-CoA => acetate (4) (complete 2/2)			0.000158742	1					3.68443e-05	1			2.36934e-05	1			0.000339954	2	0.000237615	2					0	0			0	0							0.00153407	2	1.54096e-05	1			0.00129243	4			0
kegg_ko	K15580																		4.52608e-05	1	0.00212882	2					0.00126465	3	0.00128548	2	0.00383083	3	0	0			0.00129185	3			0.00188795	5
kegg_ko	K15773				0.000250693	4	0.000212885	4	0.00155726	7			0.000100774	4	0.000330168	3			3.47645e-05	1	0.00147119	3	6.64314e-05	1					0	0			6.61532e-05	3			1.8297e-05	1	0.00122475	5			0.00105675	4	0.000148129	3	0.000101391	2
kegg_ko	K16710
kegg_ko	K16845				8.38368e-05	2															0.000842406	3					0.000157648	2	8.42916e-05	2					6.75719e-05	1			0.00054102	3			1.28592e-05	1					6.78129e-05
kegg_ko	K16846																				0.000935474	3					0.00014389	2																					0.000164678
kegg_ko	K16849	Carbohydrate metabolism | Other carbohydrate metabolism | D-Galacturonate degradation (bacteria), D-galacturonate => pyruvate + D-glyceraldehyde 3P (8) (complete 5/5)							8.08542e-05	1			0.000185827	2	4.57338e-05	1	0.000190373	1			0.00030392	1	0.00103879	6					0.000163609	2	0.000150769	1					0.000232674	3	0.000503489	7	0.000478048	4	0.000329381	4			0.00017155	3	0.000157129
kegg_ko	K17213		0.000204931	2	0.000289955	3	0.000190599	3	7.51202e-05	1	0.000460242	4					0.000394463	2	0.00114396	1	0.000237886	1									0	0			5.50516e-05	2	0.000105026	1			0.000223506	2			1.79466e-05	1
kegg_ko	K17274				5.65171e-05	1	0.000124691	1	8.2944e-05	1			1.30581e-05	1							0.000279943	1							0.000105481	1			0.000444286	3					0.000117227	1					0.00024249	1	0.00019799	2
kegg_ko	K18009		4.57428e-05	1	2.01979e-05	1					4.78235e-05	1					4.07213e-05	1															0.00024352	1	0	0	6.10421e-05	1							2.90334e-05	1
kegg_ko	K18013		4.80507e-05	1					0.000179535	2													0	0	0.000795255	4	6.89416e-05	2			9.71366e-05	1			2.51244e-05	1	0.000263343	3	0.00013428	1
kegg_ko	K18120												1.73113e-05	1																													4.7063e-05	1
kegg_ko	K18122																		6.74315e-05	1
kegg_ko	K18346	Gene set | Symbiosis | Vancomycin resistance, D-Ala-D-Lac type (11) (complete 2/2)
kegg_ko	K18843										3.91709e-05	1					1.86963e-05	1									5.95787e-05	1							0.000170483	1											0.000204631	1
kegg_ko	K18887														1.96314e-05	1																			0	0									0	0
kegg_ko	K19092		2.91674e-05	1							4.76299e-05	2			7.1585e-05	2	3.94391e-05	1			7.76836e-05	1			0	0									0.000141598	3													8.64141e-05
kegg_ko	K19156		5.96259e-05	1							7.17738e-05	1	0.000137747	2					1.49597e-05	1									0.000135655	3	0	0											0	0	5.09607e-05	1
kegg_ko	K19157		0.000598067	3	0.000302325	5	0.000174761	2	4.60067e-05	1	0.00146885	7	0.000232998	3	0.000506649	3	0.000347338	2	0	0			0.00051432	4	0.000304664	2	0.000601194	5	0.000400523	4	0.000141496	1	0.000492102	3	0.00028566	2	0.000180197	2	0.000288146	2	0.00055031	8	0.000490663	7	0.000408793	3	7.50806e-05	2	0.000396227
kegg_ko	K19824				0.000866618	3	0.000298878	2	0.00121947	10	0.000487513	1			2.94424e-05	1	0.000381519	2			0.00227781	7	0.000900751	5	0.000239341	2			6.48874e-05	1	0.000503697	1	0.000851084	4	0	0	0.000486147	2	0.0010042	6	0.00379451	12	0.00166033	9	0.00239483	5			0.000449285
kegg_ko	K20452				0.000131108	2																					0	0	0	0					0	0			0	0
kegg_ko	K21399								0.000146561	1											0.0005739	2	0	0							0.00015055	1	0.000441732	3					9.41997e-05	1	0	0	0.000320119	3			6.78301e-05	1	0
kegg_ko	K21572				3.69325e-05	1	4.30395e-05	1							0.000158225	1					0.000356256	2							0.000220883	2			0.000428467	3	0.000103173	1
kegg_ko	K21573				2.41275e-05	1	5.31716e-05	1	0.000342279	3	6.60681e-05	1					2.06129e-05	1	8.62108e-05	2					3.91573e-05	1	2.14014e-05	1											8.39119e-05	1			2.79404e-05	1	6.47749e-05	1			0
kegg_ko	K22074		0.000308642	2	9.1142e-05	4	0.000109738	3			3.81625e-05	1	0.000100108	2									2.15498e-05	1	6.91079e-05	2	0	0			0.000194669	1	2.06226e-05	1	5.50335e-05	2			0.000141074	2	7.0218e-05	1	1.52586e-05	1	0.000264895	3			0.000412116
kegg_ko	K22251
kegg_ko	K22278																						0.000307046	1																							6.74267e-05	1
kegg_ko	K22391	Metabolism of cofactors and vitamins | Cofactor and vitamin metabolism | PreQ1 biosynthesis, GTP => 7-Aminomethyl-7-deazaguanine (8) (complete 5/5)																																					0.000139198	1					4.83408e-05	1
kegg_ko	K22431		0.000104113	2	9.2073e-05	1	0.000829716	7	0.000588376	6	0.00027317	2	0.000453875	7	0.00140726	5	0.00221293	10	0.000128501	3			0.00229401	10	0.00210183	9	0.000711435	3	0.000395606	1	0.0044044	9	2.6813e-05	1	0.00120262	5	0.000361169	4	0.000362063	4	0.00136254	8	0.00189051	8	0.00108623	6			0.00199419
kegg_ko	K22906	Biosynthesis of other secondary metabolites | Biosynthesis of other bacterial compounds | Flavone degradation, luteolin/apigenin => DHCA/phloretate (3) (complete 3/3)
kegg_ko	K23005																												9.90287e-05	2	0	0							0.00016405	1
kegg_ko	K23077
kegg_ko	K23264	Nucleotide metabolism | Pyrimidine metabolism | De novo purine biosynthesis, PRPP + glutamine => IMP (24) (complete 8/8)					0.000564412	4			0.00114245	4									0.00146119	5									7.50121e-05	1					0.00021533	3	1.57714e-05	1	0	0	5.94708e-05	2					0.000495427
kegg_ko	K23351		0.000204938	1	9.42169e-05	2	5.17042e-05	1	0.000187005	1	0.000334774	1			9.74715e-05	1	0.000651104	4	2.99343e-05	1			0.000147422	1					5.30406e-05	2	0.000433541	1					0.000415733	1	0.000276147	1					3.4777e-05	1
kegg_ko	K23535
kegg_ko	K24119				1.93659e-05	1			5.96179e-05	2							0	0	0.00016805	1	0.000331065	1					0	0			0.000131874	1	8.97051e-05	1	0.000455212	1			0.000339053	2	0	0			0.000215221	2			8.81144e-05
kegg_ko	K24450						0.00144645	7					0.000481866	4							0.0206851	18	0.00109103	4			0.00110316	7			0.00181644	3							0.000466077	3	0.000354677	2	0.0066786	9
kegg_ko	K25086		4.09209e-05	1	0.000288648	6	0.000447107	6	5.31052e-05	1	0.0011535	3	0.000309421	4			0.000744003	2	3.42607e-05	1	0.000180591	2	0.00154575	4	3.15281e-05	1	0.00453111	9			0.000822302	2					0.00181802	4	0.000928989	5	0.000130506	1	0.000331385	4	0.000874145	6	0.000760292	1	0.00185794
kegg_ko	K25670				0.000638801	5	0.000521096	2					4.97457e-05	1	9.52055e-05	1	8.64599e-05	1					0.000340229	1			0.000175398	2	0.000151416	2	0.000710973	4			0	0	8.36815e-05	2	4.57287e-05	1			3.87008e-05	1	9.27033e-05	2	0.000177779	2	0.000227518
kegg_ko	K26141
kegg_ko	K26176	Biosynthesis of other secondary metabolites | Biosynthesis of other bacterial compounds | Flavone degradation, luteolin/apigenin => DHCA/phloretate (3) (complete 3/3)
kegg_ko	K26993										0.000158166	1
kegg_ko	K27260		0.0125113	15	0.0141006	32	0.0175995	38	0.019823	34	0.0139423	25	0.0074767	18	0.0107141	18	0.00919193	20	0.0197813	24	0.0227104	34	0.013693	36	0.0117761	20	0.0196847	32	0.0154449	29	0.00697177	11	0.0275403	35	0.0234203	38	0.00824298	29	0.0139627	24	0.0141334	27	0.0168896	40	0.0106336	36	0.0147531	28	0.0106149
kegg_ko	K27266		0.0176491	15	0.00802277	14	0.0109926	14	0.0115845	18	0.00563986	6	0.0106633	11	0.00949422	11	0.00767477	7	0.00564635	3	0.00731256	15	0.01802	18	0.0103435	6	0.0153515	20	0.00943448	10	0.0168953	10	0.0137323	10	0.0120949	10	0.00643031	10	0.0166585	25	0.0126725	12	0.0103858	19	0.0075099	15	0.0108315	14	0.00114238
kegg_ko	K27269		0.00057862	2	0.000332101	3	7.36686e-05	1	0	0	0.000764772	4	0	0	0	0	0.000446375	1	0.000570218	3	0.000969055	4	5.35036e-05	1	0.000473034	3	0.000148796	1	0.00027896	2	0.000326285	1	0.000679753	4	0.000473987	3	3.86529e-05	1	4.90857e-05	1	0.000368699	2	0.000154227	1	0	0	0.000152596	1	0.000543923
kegg_ko	unannotated		0.171104	731	0.149036	1035	0.163359	842	0.163081	818	0.132891	565	0.134204	890	0.168422	698	0.171613	704	0.124362	868	0.222497	628	0.153494	645	0.1909	605	0.184549	829	0.273884	682	0.223848	423	0.149931	855	0.145993	788	0.13172	866	0.205661	919	0.181727	914	0.181171	1219	0.149817	739	0.166003	815	0.162799
kegg_module	M00001	Glycolysis (Embden-Meyerhof pathway), glucose => pyruvate	0.00129334	5	0.0013385	6	0.00139368	8	0.000126078	2	0.00097343	6	0.00118472	2	0.00322584	12	0.00260968	8	0.000146993	2	0.000430173	1	0.000862208	4	0.00300217	9	3.23493e-05	1	5.35556e-05	1	0.00114471	2	0.000962692	7	2.54094e-05	1	0.00285271	4	0.000261062	4	0.00201369	3	8.55246e-05	2	0.00449359	8	4.56017e-05	1	0.000349618
kegg_module	M00002	Glycolysis, core module involving three-carbon compounds	0.00129334	5	0.00126356	4	0.0011252	4	0.000126078	2	0.000736631	4	0.000982477	1	0.00108565	5	0.000619113	6			0.000430173	1			0.00283404	7	3.23493e-05	1			0.00114471	2	0.000962692	7			0.00279276	3	0.000220242	2			6.84609e-05	1	0.00444009	6	4.56017e-05	1	0.000349618
kegg_module	M00003	Gluconeogenesis, oxaloacetate => fructose-6P	0.00129334	5	0.00129879	5	0.00135984	7	0.000191045	3	0.00097343	6	0.00118472	2	0.00417578	13	0.00250112	9			0.000430173	1	0.000503326	2	0.00287252	8	3.23493e-05	1			0.00114471	2	0.000865143	5	2.54094e-05	1	0.00279276	3	0.00024787	3	0.00177486	3	6.84609e-05	1	0.00444009	6	4.56017e-05	1	0.000349618
kegg_module	M00004	Pentose phosphate pathway (Pentose phosphate cycle)							1.96905e-05	1							0.000230991	3	1.47307e-05	1			0.000751388	3	0.000129659	1			5.35556e-05	1	0	0	4.13148e-05	1											0.000234856	3
kegg_module	M00007	Pentose phosphate pathway, non-oxidative phase, fructose 6P => ribose 5P							1.96905e-05	1							0.000230991	3	1.47307e-05	1											0	0	4.13148e-05	1
kegg_module	M00019	Valine/isoleucine biosynthesis, pyruvate => valine / 2-oxobutanoate => isoleucine					0.000407303	3			0.000167194	1			0.000586991	2							0.000159276	1			0.000633992	2			0	0													0.0016077	2	6.15988e-05	1
kegg_module	M00020	Serine biosynthesis, glycerate-3P => serine	0.000126153	1	8.74568e-05	1															0.000495134	2					0	0											5.99683e-05	1			0.00013233	2	0	0			0
kegg_module	M00027	GABA (gamma-Aminobutyrate) shunt
kegg_module	M00034	Methionine salvage pathway															0.000139069	1									2.9586e-05	1													0.000134309	1
kegg_module	M00035	Methionine degradation															0.000139069	1									2.9586e-05	1													0.000134309	1
kegg_module	M00048	De novo purine biosynthesis, PRPP + glutamine => IMP			0.000103797	2	0.000907047	8	0	0	0.00114245	4			2.23359e-05	1	4.53379e-05	1			0.00155526	6									0.00381851	4					0.000232218	4	1.57714e-05	1	0.000269777	4	5.94708e-05	2	0	0			0.000866906
kegg_module	M00063	CMP-3-deoxy-D-manno-octulosonate biosynthesis, ribulose-5P => CMP-KDO
kegg_module	M00124	Pyridoxal-P biosynthesis, erythrose-4P => pyridoxal-P			0.000117617	2															0.000495134	2					0	0															0.00013233	2	0	0			0
kegg_module	M00165	Reductive pentose phosphate cycle (Calvin cycle)	0.000991361	3	0.00129879	5	0.00100517	6	9.73409e-05	2	0.00097343	6	0.00118472	2	0.00203412	9	0.00222266	5			0.000430173	1	0	0	0.00272666	7	0	0			0.00114471	2	0.000874153	5			0.00259712	2	0.000224778	2	0.00175348	2			0.00430051	4			0.000349618
kegg_module	M00167				3.52245e-05	1	0.00023464	3	1.96905e-05	1	0.000236799	2	0.000202242	1	0.00145068	6	0.00199057	2					0	0	3.84783e-05	1					0	0	4.13148e-05	1					2.7628e-05	1	0.00175348	2
kegg_module	M00173	Reductive citrate cycle (Arnon-Buchanan cycle)			4.31282e-05	2	0.000794894	5	0.000105136	2	0.000486835	1	4.01453e-05	2	0.00515776	12	0.000771663	4	0.000532293	6	0.000968065	5	0.000633265	5	0.000439579	5	0.000257467	1	0.00294671	5	0.000648201	4	0.000195287	3	0.00518947	6	0.00101869	9	0.000292438	5	0.000460128	5	8.95308e-05	2	0.000408613	1	9.74284e-05	1	0.000330246
kegg_module	M00177		4.70124e-05	1	0.000358892	2	0.00115034	13	6.57383e-05	1	5.07938e-05	1	6.91174e-05	1			0.0017442	8	5.80742e-05	1	0.0150005	37	0.000263561	3	0.00595346	16	0.00163486	12	0.000352901	1	0.00338592	11	7.48846e-05	3					0.000494703	7	7.28495e-05	1	0.000745081	9	0.00203473	6	0.000764248	6	6.00158e-05
kegg_module	M00178		0.0394695	174	0.0373266	205	0.0344009	191	0.0318225	202	0.0725087	227	0.0531374	301	0.0597708	219	0.0446251	164	0.0785478	303	0.0443603	143	0.0489259	189	0.0446453	194	0.0474719	212	0.0559141	246	0.0220551	61	0.0610681	270	0.0598816	252	0.0535995	260	0.0442473	255	0.0459959	208	0.0592211	344	0.0470788	188	0.0417162	237	0.0632737
kegg_module	M00179		0.0141173	69	0.0143742	88	0.0169061	94	0.0140268	90	0.0255477	82	0.0200033	132	0.0231362	95	0.0175244	63	0.0257873	124	0.0415471	114	0.0158208	76	0.0205704	87	0.0196589	93	0.0193919	97	0.0136588	37	0.0233015	130	0.0173476	98	0.0199368	102	0.0146662	108	0.0169259	86	0.0235233	164	0.017059	71	0.0198414	113	0.0244423
kegg_module	M00183		0.000317597	1	0.000361547	3	0.000223072	5	0.000199279	1	0.00114078	3	0.000267765	5	0.000356345	4	0.000178568	2	0.000114452	1			0.000763493	2	0.000117832	2	0.00257489	13	0.000555913	3			0.000233021	2	0.000721536	3	0.0002184	2	0.000604881	5	0.000730259	3	0.000346038	7	0.000480932	3	7.72723e-05	3	0.000606532
kegg_module	M00214										5.04922e-05	1	0.000429051	1					0.00114396	1							0.000190702	1							1.52238e-05	1	6.16399e-05	1	0.000143691	1	4.29268e-05	1
kegg_module	M00276														5.40517e-05	2																																	3.25601e-05
kegg_module	M00307	Pyruvate oxidation, pyruvate => acetyl-CoA					0.0004869	2	1.34365e-05	1	0.000486835	1			0.00418058	4	0.000599672	2	0.000374539	2	0.000230433	2	0.000524864	3	0.000190505	2	0.000257467	1							0.00515611	5	0.00100921	8	7.69896e-05	2	0.00044112	4	8.95308e-05	2	0.000408613	1			0.000330246
kegg_module	M00335		0.000338323	4	9.50578e-05	2	7.43048e-05	1			5.45791e-05	1	0.000856681	6	0.000389983	1	0.000192793	3	3.03293e-05	1			0.00015726	2	0.000126097	3	0.000214271	2	0.000145587	2			3.6998e-05	1	0.00024988	2	3.58132e-05	2					9.84351e-05	2	0.000188166	2	0.000177808	3
kegg_module	M00336		8.89214e-05	2	0.000240246	5	0.000199362	4	7.26272e-05	3	0.000295189	6	0.00028559	7	0.000366498	5	0.000875006	7	1.72506e-05	2			8.5428e-05	1	0.000651543	7	0.000433122	5	0.000208754	4	0.000147738	3	0.000230575	3	0.000311318	5	0.000420176	6	0.00019248	5	0.000658471	8	0.000277882	7	0.000288254	4	0.000249944	5	0.000152732
kegg_module	M00357	Methanogenesis, acetate => methane					0.0002333	2			0.000113469	1	0.000397366	2	0.000136245	3	5.59448e-05	1			0.000952797	6	0	0	1.70729e-05	1					0.00876182	3	0.000586525	2	0	0			0	0	0.000164843	2	0.000411546	7	0.00152603	2	3.87694e-05	1
kegg_module	M00368	Ethylene biosynthesis, methionine => ethylene															0.000139069	1									2.9586e-05	1													0.000134309	1
kegg_module	M00377	Reductive acetyl-CoA pathway (Wood-Ljungdahl pathway)															8.06517e-05	1	8.51579e-06	1							4.30286e-05	1											0.000236841	2	0.000100362	1	3.22272e-05	1	0.000239796	1
kegg_module	M00422	Acetyl-CoA pathway, CO2 => acetyl-CoA																																					0	0
kegg_module	M00439																										0.00126465	3	0.00128548	2	0.00383083	3					0.00129185	3			0.00188795	5
kegg_module	M00459
kegg_module	M00570	Isoleucine biosynthesis, threonine => 2-oxobutanoate => isoleucine					0.000407303	3			0.000167194	1			0.000586991	2							0.000159276	1			0.000633992	2			0	0													0.0016077	2	6.15988e-05	1
kegg_module	M00609	Cysteine biosynthesis, methionine => cysteine	3.55339e-05	1													0.000139069	1									2.9586e-05	1													0.000134309	1
kegg_module	M00651	Vancomycin resistance, D-Ala-D-Lac type
kegg_module	unannotated		0.956748	2807	0.956551	4276	0.954046	3835	0.963589	3531	0.920369	2558	0.942149	4036	0.924542	2881	0.944287	2930	0.917062	3524	0.923063	2409	0.943519	2986	0.943206	2643	0.939848	3375	0.934597	2955	0.950797	1672	0.933597	3484	0.932485	3316	0.937316	4083	0.951385	3830	0.944172	3619	0.936916	4798	0.935966	3339	0.954006	3591	0.926242
kegg_pathway	ko00010		0.00129334	5	0.00138353	8	0.00230922	12	0.000296181	5	0.00191158	11	0.00122486	4	0.00835635	17	0.00332956	12	0.000521532	4	0.000660606	3	0.0018904	9	0.00319268	11	0.000289817	2	5.35556e-05	1	0.00342629	6	0.000962692	7	0.00521488	7	0.00413627	15	0.000376065	7	0.00251026	9	0.000222317	5	0.00508654	11	0.000839181	3	0.000679864
kegg_pathway	ko00020				4.31282e-05	2	0.000794894	5	0.000170103	3	0.000486835	1	4.01453e-05	2	0.00526978	7	0.000891874	6	0.000453695	5	0.000968065	5	0.00102819	5	0.000439579	5	0.000257467	1	0.000135453	2	0.000917325	5	4.99625e-05	1	0.00518947	6	0.00101869	9	0.000252514	4	0.000481501	6	8.95308e-05	2	0.000408613	1	9.74284e-05	1	0.000330246
kegg_pathway	ko00030		7.41602e-05	1	0.000172368	5	0.000665616	7	0.00202228	5	0.000236799	2	0.000202242	1	0.00224567	9	0.00222156	5	0.000840736	6	0.00219866	2	0.000862208	4	0.000168138	2	0	0	0.000434825	3	0	0	4.13148e-05	1	2.54094e-05	1	0.000196504	4	0.000192676	3	0.00193891	5	0	0	0.000556926	6			0.000588956
kegg_pathway	ko00051				5.84901e-05	2	0.000263223	4	0.000152634	2	0.000236799	2	0.000202242	1	0.00219424	9	0.00199057	2	0.000146993	2			0.00011082	1	3.84783e-05	1	3.11849e-05	1			0	0	7.36198e-05	2	2.54094e-05	1	0.000245932	3	2.7628e-05	1	0.00175348	2	0.000100031	1	0.000163734	3			3.25601e-05
kegg_pathway	ko00220				9.62844e-05	2	0.000157523	2	0.000592055	3	0.000320137	2	0.000368647	4	0.000197731	2	0.000549412	5	1.11773e-05	1			0.000205186	2	0.000156374	3	0.00126367	8			0.000259974	1	2.19301e-05	1			0.000148424	2	0.00201324	8	0.000115959	3			0.000680208	4	5.1779e-05	2	8.71942e-05
kegg_pathway	ko00230		0.000317597	1	0.000565512	8	0.00118117	14	0.000199279	1	0.00260337	9	0.000278284	6	0.00050431	8	0.000705817	8	0.000132643	2	0.00280549	13	0.000763493	2	0.000554547	6	0.0029664	17	0.000555913	3	0.00381851	4	0.00037324	5	0.000778359	4	0.000511069	8	0.000634314	7	0.00127266	13	0.000405509	9	0.000620795	4	7.72723e-05	3	0.00206239
kegg_pathway	ko00240		0.000471179	3	0.00049503	4	0.000308558	7	0.000199279	1	0.00116864	4	0.000267765	5	0.000568337	8	0.000589984	7	0.000167247	3	0.00124512	7	0.0011455	5	0.000117832	2	0.00341655	18	0.000576744	4	0.000241482	2	0.000338202	4	0.000778359	4	0.000529212	4	0.000762961	9	0.000828927	5	0.000396482	9	0.000665811	5	0.000174197	5	0.000606532
kegg_pathway	ko00250		5.69617e-05	1	9.62844e-05	2	0.000470445	6	0.000592055	3			0.000358127	3	0.000197731	2	0.000389152	3	0.000228835	4			0.000205186	2	0.000243349	2	0.00114278	7			0.00384806	3	2.19301e-05	1			0.000293487	3	0.00196226	7	0.000235605	5	2.69371e-05	1	0.000820067	5	2.24368e-05	1	0.000371479
kegg_pathway	ko00260		0.000281056	2	0.000112488	2	6.28979e-05	1	3.5177e-05	1					0.000849816	5	0.000332605	1	0.000109871	2	0.000495134	2	0.000109631	1	0.000612621	3	0.000808211	2	9.38003e-05	1	0.00109583	4	0.000147901	1	3.40628e-05	1	2.3397e-05	1	0.000128443	3	0.000379589	3	0.00013233	2	0.000152042	2	4.56017e-05	1	0.000205521
kegg_pathway	ko00270		3.55339e-05	1	0.000694963	4	0.000744693	4			0.000167194	1			0.000153097	2	0.000262739	2	4.7821e-05	2	0.000564689	2	0	0			0.00083267	6	0.000538705	2	0.000527927	4			0	0	0.00142992	7	0.00016659	2	0.000305432	3	1.28592e-05	1	4.4474e-05	1
kegg_pathway	ko00290				0	0	0.000407303	3			0.000167194	1			0.000656559	3	4.5046e-05	1					0.000238162	2			0.000633992	2			0	0													0.0016077	2	6.15988e-05	1
kegg_pathway	ko00300		8.92917e-05	1			1.60515e-05	1									4.57824e-05	1			9.24272e-05	1	0	0	0.000124707	1	0	0					7.44989e-05	1					0.000443242	5	0.000137171	2							4.77296e-05
kegg_pathway	ko00410
kegg_pathway	ko00430						0.000177839	1	0	0	0.000113469	1	0.000397366	2	0.000136245	3	5.59448e-05	1			8.13181e-05	1	0	0	1.70729e-05	1							0.000586525	2	0	0					0.000164843	2	1.8491e-05	1	0.00152603	2	3.87694e-05	1
kegg_pathway	ko00520		0.000261689	1	6.14762e-05	2	0.00021869	3	0.000266066	2	0.000118095	2			5.40517e-05	2			0.00040713	4			0.000751388	3	0.000129659	1			9.05251e-05	2	0.000211238	1			0	0	0.000420055	5	5.13066e-05	2	0.000338632	4	0.000109696	3	0.000300834	4			3.25601e-05
kegg_pathway	ko00540																				0.00048491	2
kegg_pathway	ko00550												0	0	1.21757e-05	1			3.30292e-05	1			0	0	3.5822e-05	1											1.49834e-05	1			7.0556e-05	2			0.000112112	1			6.65925e-05
kegg_pathway	ko00620		0.000262288	2	0.00197037	4	0.00112074	6	0.000170103	3	0.000600304	2	0.000437512	4	0.00625479	16	0.00120577	9	0.000587056	5	0.0011544	6	0.00113659	7	0.000286206	5	0.000257467	1	0.00499445	5	0.00169621	6	0.000931676	8	0.00518947	6	0.00101869	9	0.000116914	3	0.000627337	7	0.000246402	5	0.00554202	6	0.00258512	8	0.000623178
kegg_pathway	ko00650		0.000481832	3	0.00943159	8	0.00735247	15	0.000170025	3	0.000486835	1	4.01453e-05	2	0.00891471	11	0.0061148	8	0.00044197	3	0.000611034	4	0.00883739	10	0.000376302	5	0.000257467	1	0.00658717	2	0.00596726	3	0.00205213	6	0.0058153	8	0.00101869	9	7.69896e-05	2	0.0049706	8	0.0018587	5	0.00804974	8	0.00191349	4	0.000881522
kegg_pathway	ko00670								3.5177e-05	1							8.06517e-05	1	8.51579e-06	1	9.40749e-05	1			0.000409399	1	4.30286e-05	1			0.000581985	5			3.40628e-05	1	2.3397e-05	1	0.000128822	1	0.000270117	2	3.22272e-05	1	0.000363594	3			0.000205521
kegg_pathway	ko00680		0.000428129	3	0.000175888	4	0.000822614	6	3.5177e-05	1	0.000350269	3	0.000599608	3	0.00289355	13	0.00232843	6	0.000146993	2	0.00208362	10	0.00011082	1	0.00061081	4	4.53922e-05	2			0.009594	7	0.00073185	4	5.94721e-05	2	3.81445e-05	1	0.000156254	4	0.00191833	4	0.000612336	10	0.00155018	3	8.43712e-05	2	0.000750362
kegg_pathway	ko00710		0.000991361	3	0.00132873	6	0.00110941	7	0.000145769	3	0.00097343	6	0.00118472	2	0.0046264	18	0.00246654	8	7.85982e-05	1	0.000892223	2	0.000611727	4	0.00272666	7	0	0	0.00281125	3	0.00154693	4	0.00105178	8	2.54094e-05	1	0.00279276	3	0.000264702	3	0.00177486	3			0.00444009	6	0.000773786	5	0.000349618
kegg_pathway	ko00720		0.000210435	1	0.00183812	4	0.00100133	7	0.000105136	2	0.000600304	2	0.000437512	4	0.00532921	16	0.000908259	6	0.000540809	7	0.0012756	7	0.000633265	5	0.00062498	9	0.000333047	3	0.00504966	6	0.000648201	4	0.000836573	6	0.00518947	6	0.00101869	9	0.000529278	7	0.000725333	8	0.000140249	4	0.00569091	5	0.000136198	2	0.000330246
kegg_pathway	ko00750				0.000117617	2	3.98928e-05	1							0.000375866	4	0.000332605	1			0.000495134	2					3.72569e-05	1	9.38003e-05	1	0.000758026	1											0.00013233	2	0.000120498	1			0
kegg_pathway	ko00770				2.9041e-05	1	0.000407303	3	0	0	0.000167194	1			0.000586991	2							0.000159276	1			0.000633992	2	7.09659e-05	1	0	0					0	0	2.94009e-05	1	0.000103385	2			0.0016077	2	6.15988e-05	1
kegg_pathway	ko00791										0.000143636	1	1.05197e-05	1
kegg_pathway	ko00910		5.69617e-05	1	9.62844e-05	2	8.97447e-05	2	0.000592055	3	0.000176502	1	0.000358127	3	0.000197731	2	0.000389152	3	0.000217658	3	8.06571e-05	1	0.000288313	3	0.000140691	2	0.00121805	7	6.74166e-05	1	0.000424955	2	2.19301e-05	1			9.99121e-05	1	0.00196226	7	6.56437e-05	2			0.000680208	4
kegg_pathway	ko01051								1.96905e-05	1
kegg_pathway	ko01100		0.0036022	26	0.0127423	45	0.013146	75	0.00468546	28	0.00579513	33	0.00351415	25	0.0191794	79	0.0136289	55	0.00552269	47	0.0146839	50	0.0134391	38	0.00566496	34	0.00880683	56	0.0120607	33	0.0269068	33	0.00504128	44	0.012649	28	0.00563287	37	0.00540467	56	0.00693014	55	0.00452307	51	0.0193279	52	0.00454473	27	0.00727569
kegg_pathway	ko01110		0.0019261	10	0.0077296	21	0.00831758	34	0.000706287	9	0.00273439	15	0.00156476	4	0.0117568	37	0.00949372	32	0.00254867	24	0.00339838	15	0.0101385	17	0.00414455	18	0.00230479	14	0.00273781	10	0.0156615	20	0.00172037	16	0.00531274	11	0.00339423	14	0.00124885	20	0.00393611	24	0.000262842	7	0.0146213	26	0.00110625	8	0.00351104
kegg_pathway	ko01120		0.00200524	11	0.0110076	20	0.00912212	35	0.00249448	13	0.00234519	14	0.00199088	10	0.0149043	45	0.0096859	28	0.00182366	19	0.00559468	20	0.0105283	21	0.00430195	22	0.00135488	14	0.0101248	14	0.0186585	18	0.00234228	20	0.00587477	10	0.00424085	19	0.00341161	27	0.00309138	19	0.00277146	21	0.0150301	26	0.00356523	13	0.00259549
kegg_pathway	ko01130		0.00205225	11	0.00347297	16	0.004226	29	0.000714296	10	0.0033017	17	0.0015719	5	0.0102534	28	0.00404074	22	0.00156602	17	0.00383427	16	0.00230835	12	0.00433505	20	0.00232725	10	0.00229196	4	0.00913864	18	0.00123681	11	0.0102811	14	0.00449006	24	0.00134468	22	0.00412388	25	0.000414117	9	0.0105794	19	0.00110455	9	0.00247127
kegg_pathway	ko01200		0.00197548	10	0.00762911	16	0.0090827	32	0.00228868	10	0.00175024	9	0.00162223	6	0.0148215	39	0.00936513	25	0.0015279	16	0.00552533	19	0.010421	19	0.00434178	23	0.00186383	10	0.00548448	9	0.0173764	15	0.00400388	20	0.00524894	8	0.00416422	17	0.00115801	16	0.00764753	19	0.000751158	14	0.0147192	23	0.000955585	8	0.00245546
kegg_pathway	ko01210				0	0	0.000511551	4			0.000167194	1			0.000656559	3	0.000138264	2	1.11773e-05	1			0.000238162	2	0.000249074	3	0.000633992	2			0	0							0.000131517	2	0.000109472	1			0.0016077	2	9.09411e-05	2
kegg_pathway	ko01230		0.00175618	10	0.00141127	7	0.00209698	17	0.000215555	5	0.00114062	7	0.00157585	6	0.00479514	23	0.00392466	19	0.000848659	14	0.00101774	4	0.000666867	6	0.00367138	14	0.00162276	14	0.000337747	4	0.00258929	8	0.00138532	11	0.00028062	5	0.00299201	6	0.00273742	17	0.00260533	12	0.000262938	4	0.00622399	11	0.000215246	5	0.00137163
kegg_pathway	ko01501												0	0													0.00126465	3	0.00128548	2	0.00383083	3					0.00129185	3			0.00188795	5			1.30661e-05	1
kegg_pathway	ko01502														1.21757e-05	1																																	3.33976e-05
kegg_pathway	ko01523								3.5177e-05	1							8.06517e-05	1			9.40749e-05	1			0.000409399	1	4.30286e-05	1			0.000548405	4			3.40628e-05	1			0.000128822	1					0.000239796	1
kegg_pathway	ko02010				0.00052911	2	0.00303095	7	0.000167307	2	0.00109315	4	0.000690845	4	0.000114083	2	0.000159269	2	0.00114396	1			0.00139934	3	3.15281e-05	1	0.0030443	9	0.00128548	2	0.00482425	6	0.00015509	2	1.52238e-05	1	0.00147895	5	0.000185901	2	0.00206138	7			1.65776e-05	1	0.000343389	2	0.00059406
kegg_pathway	ko02020		0.000303138	3	0.00245659	7	0.00142835	5	0.000178216	3	0.000739332	5	0.000523167	6	0.00195021	6	0.000970434	8	4.29386e-05	2	0.000481166	3	0.000957926	5	0.000418549	5	0.00117067	5	0.00308341	3	0.000333361	2	0.00078421	7	0.00120065	7	0.000407701	5	0.00187679	8	0.000406613	6	0.000359862	5	0.00384635	7	0.000512539	8	0.000434413
kegg_pathway	ko02024		0.000753558	9	0.000260978	5	7.43048e-05	1	0.000313457	2	0.000337844	3	0.00151551	9	0.0013323	4	0.000228642	4	3.03293e-05	1	0.00239446	3	0.000538912	4	0.000320199	5	0.00179416	9	0.00167066	7	0.00383083	3	0.00109162	6	0.000796494	5	0.00159496	8	6.60246e-05	1	0.00188795	5	0.000269972	4	0.000843598	5	0.000672351	8
kegg_pathway	ko02030										0.000283059	1	0.000429051	1			0.000342828	2	0.00114396	1							0.000190702	1							1.52238e-05	1			0.000143691	1					8.92984e-05	2
kegg_pathway	ko02060		0.000172718	1			6.79597e-05	1	7.59476e-05	1	0.000278416	1	4.62538e-05	1	5.40517e-05	2	0.000212268	1	1.03517e-05	1			0.00035666	2	0.000320036	2	0.000139686	2	6.23011e-05	3					5.53007e-05	1	0.00197764	10	0.000391312	3			1.55227e-05	1			0.000389171	2	7.74019e-05
kegg_pathway	ko03010		0.0395166	175	0.0376855	207	0.0356491	205	0.0318882	203	0.0725595	228	0.0532066	302	0.0597708	219	0.0463693	172	0.0786059	304	0.0627345	184	0.0495051	195	0.0505987	210	0.0493566	226	0.056267	247	0.026144	75	0.061143	273	0.0598816	252	0.0535995	260	0.044742	262	0.0462094	211	0.0601868	356	0.0491135	194	0.0424805	243	0.0633889
kegg_pathway	ko03018		0.000864966	6	0.000132517	2	0.000442239	2	0.00090038	6	0.000354856	3	0.000658826	3	0.00144453	5	0.00036888	5	0.000146993	2	0.00247361	4	0.000196739	2	3.72498e-05	1	0.000264667	4	0.000239589	3	0	0	0.00105462	5	0.000603437	4	0.000141842	2	8.91164e-05	2			0.000239998	3	0.00091102	6	0.00037601	4
kegg_pathway	ko03020		0.000317597	1	0.000361547	3	0.000223072	5	0.000199279	1	0.00114078	3	0.000267765	5	0.000356345	4	0.000178568	2	0.000114452	1	0.00119679	6	0.000763493	2	0.000117832	2	0.00257489	13	0.000555913	3			0.000233021	2	0.000721536	3	0.0002184	2	0.000604881	5	0.000730259	3	0.000346038	7	0.000480932	3	7.72723e-05	3	0.000606532
kegg_pathway	ko03060		0.000427245	6	0.000335304	7	0.000273667	5	7.26272e-05	3	0.000349768	7	0.00114227	13	0.000756481	6	0.0010678	10	4.75799e-05	3			0.000242688	3	0.00077764	10	0.000647393	7	0.000354341	6	0.000147738	3	0.000267573	4	0.000561198	7	0.000455989	8	0.00019248	5	0.000658471	8	0.000376317	9	0.00047642	6	0.000427752	8	0.000152732
kegg_pathway	ko03070		0.000427245	6	0.000335304	7	0.000273667	5	7.26272e-05	3	0.000349768	7	0.00114227	13	0.000756481	6	0.0010678	10	4.75799e-05	3			0.000242688	3	0.00077764	10	0.000647393	7	0.000354341	6	0.000147738	3	0.000267573	4	0.000561198	7	0.000455989	8	0.00019248	5	0.000658471	8	0.000376317	9	0.000489486	7	0.000427752	8	0.000152732
kegg_pathway	ko04112																0.00016346	1	5.19609e-05	1	0	0			5.58426e-05	1	0.000313226	3			7.99139e-05	1							2.21116e-05	1	7.02568e-05	1			1.50272e-05	1
kegg_pathway	ko04122		0.000145025	1					4.52323e-05	1	0.00069157	2							0.000292801	5			0.000166988	1					0.000112301	3					0.000141401	2			5.92302e-05	1	6.52553e-05	1	0	0	0	0			4.79733e-05
kegg_pathway	ko04621		0.000257913	1	0.000280662	4	0.000803304	4	0	0	0.000639722	3	0.000792092	8	0.00019603	2			0.000608764	10	0.000607956	4	0.000215258	1	4.16259e-05	1	0.00094179	3	0.000866157	1	0.000191571	3	0.000397646	6	0.000126416	2	4.59238e-05	3	0.000116786	2	0.000161254	2	0.000210772	3	9.95465e-05	2	0.000829989	7
kegg_pathway	ko04727						0.000106138	2					0.000394901	4	9.72403e-05	1			4.70974e-05	1			0.000205186	2			8.89291e-05	1			0.000259974	1					0	0	0.00173722	4	6.56437e-05	2	8.59615e-05	2	3.19112e-05	1
kegg_pathway	ko04922						0.000176088	1	6.49666e-05	1					0.000470486	1	0.00130277	3							0.00014586	1			3.71379e-05	1			0.000231623	4	0	0			4.05841e-05	1					0.000137895	2	4.56017e-05	1
kegg_pathway	ko04940																				7.91587e-05	1																							5.80574e-05	1
kegg_pathway	ko05111		0.000357838	4	0.000150411	3			0.000313457	2	0.000283265	2	0.000658826	3	0.000972878	4	0.000210453	3	4.29386e-05	2	0.00239446	3	0.000398802	2	0.000291833	3	0.000297573	3	0.000239589	3	0	0	0.00153061	9	0.000707393	4	0.000450951	4	0.000130917	3	0.000111046	1	0.000350386	4	0.000684111	4	0.000501308	6
kegg_pathway	ko05230																0.000228774	1	0.000146993	2			0.00011082	1	0.00014586	1							9.75485e-05	2	0	0									2.4151e-05	1	4.56017e-05	1
kegg_pathway	ko05418		0.000257913	1	0.000280662	4	5.11841e-05	2	0	0	0.000639722	3	0.000792092	8	0.00019603	2			0.000608764	10	0.00017348	2	0.000215258	1	4.16259e-05	1	0.00157775	6			0.000430108	4	0.000397646	6	0.000126416	2	4.59238e-05	3	0.000116786	2	0.000211569	3	0.000210772	3	9.95465e-05	2	0.000869052	8
kegg_pathway	unannotated		0.955052	2792	0.946391	4246	0.938157	3787	0.96134	3512	0.917418	2541	0.939712	4013	0.914143	2852	0.934441	2895	0.912068	3484	0.912636	2389	0.926634	2963	0.940074	2625	0.931611	3336	0.927909	2937	0.93523	1648	0.928779	3448	0.927775	3297	0.93366	4053	0.948531	3805	0.936031	3592	0.929223	4768	0.928166	3300	0.948043	3546	0.923939
kegg_rclass	RC00002	O1c-O2c:*-P1b:P1b-P1b	0.000819017	2	0.000244687	4	0.000376457	6	0.00214599	7	0.000176502	1	0.000430372	3	0.00203082	15	0.00092729	8	0.000787688	11	0.00227997	3	0.000984292	7	0.00276648	7	0.000304286	3	0.0030552	6	0.000290018	2	0.000990885	6	0.000221147	3	0.000382373	7	0.000142508	6	0.00103933	14	0.000235495	6	0.00197087	5	6.81117e-05	2	0.000934817
kegg_rclass	RC00004	S1a-S2a:*-C5a:C1b-C1b	0.000267831	2	0.00195361	4	0.000767531	4	0.000392143	3	0.000600304	2	4.01453e-05	2	0.00424013	6	0.000655616	3	0.000519661	6	0.000599172	5	0.000524864	3	0.000443058	6	0.000257467	1	0.00215817	2	0.00179441	6	4.99625e-05	1	0.00518947	6	0.00101869	9	0.000275222	4	0.000622142	7	8.95308e-05	2	0.00392508	2	0.00184073	3	0.000623178
kegg_rclass	RC00006	C1c-C5a:N1a+*-*+O5a:C1b+C6a-C1b+C6a	5.69617e-05	1	0.000183741	3	0.000156769	3	0.000592055	3	0.000167194	1			0.000100491	1	0.000389152	3	0.000228835	4	0.000495134	2	0	0			0.000908774	4			0.00016498	1	2.19301e-05	1			9.99121e-05	1	0.000267749	4	0	0	0.00013233	2	0.000680208	4			0
kegg_rclass	RC00010	C5a-C6a:N1a+*-*+O6a:C1b+O5a-C1b+O6a	0.000183973	3	2.98576e-05	1	0.00075973	8	6.74285e-05	1	0.00114245	4	0.000412876	5	0.000138063	2			0.000772378	6	0.00146119	5	0.000205186	2	6.02925e-05	1	0.000135321	2	1.76567e-05	1	0.000499967	3	5.03739e-05	2			0.00021533	3	0.001753	5	0.000159747	3	0.000204469	6					0.000507036
kegg_rclass	RC00012	C5a-C6a:S2a+*-*+O6a:C1a+O5a-C1a+O6a					0.000550318	1	6.48889e-05	1									0.000187658	2													0.000139009	3	0.000625829	2							0.000131797	2			4.34964e-05	1
kegg_rclass	RC00014	C5a-C6a:S2a+*-*+O6a:C1b+O5a-C1b+O6a	5.73966e-05	1			0.000550318	1	6.48889e-05	1									0.000187658	2					0.000156852	1			5.52144e-05	1			0.000139009	3	0.000625829	2			9.02145e-05	1			0.000131797	2			4.34964e-05	1
kegg_rclass	RC00017	O1a-O2b:*-P1b:C1b-C1b	0.000730046	2	0.000131623	3	0.00017028	4	0.00230216	6			0.000347037	1	0.000465907	7	0.000544873	2	0.000238302	5	0.00238684	3	0.00011082	1	0.000320036	2	9.54983e-05	2	0.000156101	4	0.000758026	1			0	0	0.00186075	12	0.000346322	3	0.000396205	3	1.70636e-05	1	0.000302706	3	0.000389171	2	7.74019e-05
kegg_rclass	RC00021	S0-S2a:C1b-*:C1a+C1b-C1a+C1b															0.000139069	1									2.9586e-05	1													0.000134309	1
kegg_rclass	RC00032	C1c-C4a:C5a-*:C1c+O1a-C1c+O4a							1.96905e-05	1													0	0
kegg_rclass	RC00036	C1c-C5a:N1a+*-*+O5a:C1c+C6a-C1c+C6a			8.74568e-05	1					0.000167194	1									0.000495134	2					0	0			0	0											0.00013233	2	0	0			0
kegg_rclass	RC00043	O6a-O7a:*-P1b:C6a-C7a					0.000177839	1			0.000176502	1	0.000397366	2	0.000136245	3	9.32177e-05	1			8.13181e-05	1	0	0	0.00276648	7	0.000220345	2					0.000586525	2	0	0					0.000274315	3	4.54281e-05	2	0.00178866	3	6.81117e-05	2
kegg_rclass	RC00063	N4x-N4y:*-C1y:C8x+C8y-C8x+C8y	5.77593e-05	1			2.77944e-05	1							4.09267e-05	2	0.000187331	1	5.27954e-05	2			0.000293892	2	6.83577e-05	1	0.000733447	3	2.08308e-05	1	0.000162701	1	4.26709e-05	1			0.000134125	1	0.00011995	2							7.32244e-05	1
kegg_rclass	RC00064	N1a-N1b:*-C5a:C1c-C1c			0.000105642	2	2.39294e-05	1							2.23359e-05	1	4.53379e-05	1	3.30292e-05	1			0	0	0.000160529	2					0	0					0.000191671	2	2.94009e-05	1	0.000210982	5	0	0	0.000139859	1			6.65925e-05
[truncated: 13,580 more rows]
[truncated: 35 more columns]

## Sheet: SEPTaxonomy
taxon_type	taxon	BHC02_Pellet_AS	BHC02_Pellet_AS_Npeptides	BHC03_Pellet_AS	BHC03_Pellet_AS_Npeptides	BHC12_Pellet_AS	BHC12_Pellet_AS_Npeptides	BHC13_Pellet_AS	BHC13_Pellet_AS_Npeptides	BHC15_Pellet_AS	BHC15_Pellet_AS_Npeptides	BHC17_Pellet_AS	BHC17_Pellet_AS_Npeptides	BHC18_Pellet_AS	BHC18_Pellet_AS_Npeptides	BHC19_Pellet_AS	BHC19_Pellet_AS_Npeptides	BHC20_Pellet_AS	BHC20_Pellet_AS_Npeptides	BHC25_Pellet_AS	BHC25_Pellet_AS_Npeptides	BHC27_Pellet_AS	BHC27_Pellet_AS_Npeptides	BHC28_Pellet_AS	BHC28_Pellet_AS_Npeptides	BHC29_Pellet_AS	BHC29_Pellet_AS_Npeptides	BHC31_Pellet_AS	BHC31_Pellet_AS_Npeptides	BHC32_Pellet_AS	BHC32_Pellet_AS_Npeptides	KHC01_Pellet_AS	KHC01_Pellet_AS_Npeptides	KHC02_Pellet_AS	KHC02_Pellet_AS_Npeptides	KHC03_Pellet_AS	KHC03_Pellet_AS_Npeptides	KHC04_Pellet_AS	KHC04_Pellet_AS_Npeptides	KHC06_Pellet_AS	KHC06_Pellet_AS_Npeptides	KHC07_Pellet_AS	KHC07_Pellet_AS_Npeptides	KHC08_Pellet_AS	KHC08_Pellet_AS_Npeptides	KHC09_Pellet_AS	KHC09_Pellet_AS_Npeptides	KHC10_Pellet_AS	KHC10_Pellet_AS_Npeptides
[truncated: 6,268 more rows]
[truncated: 34 more columns]
