# Supplementary material for: Expanding the human metaproteome: enhancing small open reading frame (smORF) prediction and ultra-deep detection of smORF-encoded proteins in the gut microbiome
Source: Research Square preprint supplement (doi:10.21203/rs.3.rs-7768562/v1), 2025-11-06
Supplement: Supplementary file 3 [file d3a898e847c55f9156d9216b.xlsx]

## Sheet: Astral
proteins	BHC02_Pellet_AS	BHC02_Pellet_AS_Npeptides	BHC03_Pellet_AS	BHC03_Pellet_AS_Npeptides	BHC12_Pellet_AS	BHC12_Pellet_AS_Npeptides	BHC13_Pellet_AS	BHC13_Pellet_AS_Npeptides	BHC15_Pellet_AS	BHC15_Pellet_AS_Npeptides	BHC17_Pellet_AS	BHC17_Pellet_AS_Npeptides	BHC18_Pellet_AS	BHC18_Pellet_AS_Npeptides	BHC19_Pellet_AS	BHC19_Pellet_AS_Npeptides	BHC20_Pellet_AS	BHC20_Pellet_AS_Npeptides	BHC25_Pellet_AS	BHC25_Pellet_AS_Npeptides	BHC27_Pellet_AS	BHC27_Pellet_AS_Npeptides	BHC28_Pellet_AS	BHC28_Pellet_AS_Npeptides	BHC29_Pellet_AS	BHC29_Pellet_AS_Npeptides	BHC31_Pellet_AS	BHC31_Pellet_AS_Npeptides	BHC32_Pellet_AS	BHC32_Pellet_AS_Npeptides	KHC01_Pellet_AS	KHC01_Pellet_AS_Npeptides	KHC02_Pellet_AS	KHC02_Pellet_AS_Npeptides	KHC03_Pellet_AS	KHC03_Pellet_AS_Npeptides	KHC04_Pellet_AS	KHC04_Pellet_AS_Npeptides	KHC06_Pellet_AS	KHC06_Pellet_AS_Npeptides	KHC07_Pellet_AS	KHC07_Pellet_AS_Npeptides	KHC08_Pellet_AS	KHC08_Pellet_AS_Npeptides	KHC09_Pellet_AS	KHC09_Pellet_AS_Npeptides	KHC10_Pellet_AS	KHC10_Pellet_AS_Npeptides	KHC11_Pellet_AS
expobiome_human_015330	4.50081e+08	3	3.34295e+08	2	8.07828e+08	3	9.21299e+08	3			6.24179e+08	3	5.17477e+08	3	4.87799e+08	3	6.96716e+07	2	7.70985e+08	3			1.04012e+07	1	6.10065e+06	1	1.16774e+09	3			2.24543e+08	2	1.94489e+08	1	4.43637e+08	3	1.86019e+07	1	9.1239e+07	1	6.168e+08	4	8.72875e+08	2	6.34411e+08	2	6.1392e+08	2	2.0939e+08
expobiome_human_017960			2.32803e+07	2	8.93823e+07	3	7.81434e+06	1					2.66194e+07	2	1.86538e+07	1	2.53811e+07	1	7.0156e+07	3	1.35336e+07	1	1.36156e+07	1			2.76201e+07	3			1.53717e+08	4			7.79931e+06	1	1.64234e+07	1			4.68841e+07	3	4.84151e+07	3	4.31647e+07	2			2.20354e+07
expobiome_human_044376	6.55393e+06	1	1.44477e+07	1	1.39609e+08	2	1.69907e+07	1	5.56513e+06	1	2.52184e+06	1	4.69982e+07	2	2.90296e+07	2	1.16203e+07	1	7.3245e+07	2	1.77394e+07	1	1.27744e+07	1	7.30135e+06	1	4.40103e+07	2	2.96323e+06	1	1.07023e+08	2	3.18736e+06	1	5.81393e+06	1	3.93224e+07	2			1.20734e+07	1	1.78868e+07	1	1.55504e+07	1	8.55056e+06	1	3.2206e+06
expobiome_imp_00075077
expobiome_imp_00179939																									1.26231e+07	1
expobiome_imp_00479850
expobiome_imp_00612852																																			5.52136e+06	1
expobiome_imp_06152517													6.67073e+07	1																															2.75845e+07	1
expobiome_imp_06792372
expobiome_imp_07031431
expobiome_imp_10681007																																																	6.57591e+07
expobiome_imp_10922390																																									2.76079e+08	2
expobiome_imp_14075088
expobiome_imp_16102657
expobiome_imp_16724481																					3.0316e+07	2													5.1919e+06	1									1.53776e+08	5	3.23606e+07	3
expobiome_imp_16814643
expobiome_imp_17087869																																							1.89201e+08	1
expobiome_imp_17640723
expobiome_imp_18930458	1.45778e+07	1	2.38942e+07	1					6.52963e+07	2	1.53203e+07	1			3.52669e+07	1	4.9764e+07	1									2.43525e+07	1			1.2326e+08	1	2.14037e+07	1	6.95578e+07	2			1.30296e+07	1			5.29384e+07	2	4.7296e+06	1	2.43284e+07	1	3.58709e+07
expobiome_imp_18997793	5.80279e+06	1
expobiome_imp_19034614
expobiome_imp_21029173																					9.75848e+07	2
expobiome_imp_23339534
expobiome_imp_23601795
expobiome_imp_24097260																											1.66517e+08	1	4.19373e+08	2
expobiome_imp_26953264															6.88782e+07	1					2.43133e+07	1													3.1256e+08	3
expobiome_imp_27000893
expobiome_imp_27003352															2.41955e+08	3					2.97216e+07	1													4.59057e+08	4													2.15308e+08
expobiome_imp_29206010
expobiome_imp_30169037									6.96955e+08	5																																	1.71974e+08	1			2.22873e+08	1
expobiome_imp_30285722					1.85253e+08	2																			2.56576e+08	3																			1.3714e+08	2	1.71851e+07	1
expobiome_imp_30286085
expobiome_imp_31880349
expobiome_imp_31906331															9.22647e+07	2									8.41836e+06	1
expobiome_imp_32083851					2.41467e+07	1																																							1.03902e+08	2
expobiome_imp_32103712
expobiome_imp_32111116
expobiome_imp_32124021
expobiome_imp_38405474					1.25396e+08	2			1.04926e+08	3															9.06384e+07	1							7.82075e+07	3
expobiome_imp_38781080															2.45865e+08	5
expobiome_imp_38790599
expobiome_imp_42309998
expobiome_imp_43347706					7.04685e+08	2																																									2.50551e+08	2
expobiome_imp_43392135					1.56736e+08	2					1.26153e+08	1													1.1116e+07	1											1.29841e+08	1			3.55019e+08	4
expobiome_imp_43681214					3.16732e+07	2															3.36779e+08	6	4.25553e+08	6	6.90118e+07	3											3.94238e+08	7	5.17616e+07	2
expobiome_imp_47459647
expobiome_imp_47462785					1.15631e+07	1			1.21448e+07	1											1.13064e+08	1													1.04184e+07	1			1.7448e+07	1									1.21437e+08
expobiome_imp_47462936	7.30019e+08	1	4.01703e+08	1			3.06994e+08	1	5.27691e+08	1	6.92137e+08	1	2.83863e+08	1	5.25777e+08	1	7.04501e+08	1	1.08324e+08	1	1.15867e+08	1	2.54199e+08	1	4.40435e+08	1	2.58236e+08	1	1.70994e+08	1	5.25178e+08	1	3.70005e+08	1	3.48016e+08	1	2.79033e+08	1	2.56686e+08	1	3.87872e+08	1	2.6656e+08	1	7.52558e+08	1	4.43745e+08	1	2.75567e+08
expobiome_imp_47480155	1.16342e+08	1	3.82577e+08	1							3.41005e+08	2			3.37342e+07	1							5.65958e+07	1			9.20168e+07	1			1.53633e+08	1	1.15182e+08	1			9.86925e+07	1	4.10082e+07	1	2.16222e+08	2			2.30534e+08	1	9.98023e+07	1
expobiome_imp_47561735	1.22846e+08	2			2.25687e+08	1					1.41548e+08	3	1.84697e+08	1			4.45053e+08	4	1.94871e+07	1									4.73183e+07	1			1.7167e+08	2													7.94739e+07	1	2.87833e+08
expobiome_imp_47569628			1.14412e+08	1	7.51515e+07	1					9.40558e+07	2	8.86127e+07	1							3.89704e+07	1	5.84785e+07	1	7.11172e+07	1	1.24965e+08	1	3.34382e+07	1	5.65098e+07	1	2.61794e+08	4	8.39639e+07	1	5.54831e+07	1	1.01596e+08	1			5.73909e+07	1	9.95958e+07	1
expobiome_imp_47611437																	9.80341e+07	1															2.69085e+08	3							7.34488e+07	1
expobiome_imp_47615775	2.42437e+07	1																			1.20562e+07	1									1.2305e+07	1	1.65651e+07	1					1.846e+07	1									5.58039e+07
expobiome_imp_47660146	1.56173e+08	1	2.86367e+07	1					8.84596e+07	1	7.74498e+07	1	6.71206e+07	1	9.68931e+07	1	9.30035e+07	1											4.22244e+07	1					5.34911e+07	1					1.32871e+08	1			1.03393e+08	1	4.99371e+07	1
expobiome_imp_47665539					2.28467e+08	4					7.00277e+07	3					2.96765e+08	6			3.0781e+07	2			2.39448e+07	2	1.01489e+08	2					6.20577e+08	5			1.6278e+08	2
expobiome_imp_47668573	1.57208e+08	4					4.02356e+08	5	1.78654e+08	4	3.59778e+08	6	1.59994e+08	4	3.92175e+07	3	3.37633e+08	4	8.3314e+07	4	4.34067e+07	3	8.28742e+07	3					9.66776e+07	4	2.49382e+08	4	9.20804e+07	4	1.64358e+08	4	2.15252e+08	4			1.56294e+08	4	1.18958e+08	4	3.11631e+08	4	6.43362e+07	4	9.94397e+07
expobiome_imp_47683566	1.01458e+08	1	6.72762e+07	1	3.98909e+07	1	1.85729e+07	1	8.9775e+07	1	6.12093e+06	1			2.14761e+07	1	1.16495e+08	2			3.15029e+07	1					4.31854e+07	1	1.71337e+07	1	1.55101e+07	1	3.65258e+07	2	7.47267e+07	1	1.47742e+08	2	9.92993e+07	2	5.83192e+07	1			1.35523e+07	1	8.1021e+07	1	1.35745e+08
expobiome_imp_47691954									8.9838e+07	2					3.25493e+07	1															8.75764e+07	1									6.79066e+07	1							5.26286e+07
expobiome_imp_47798738	3.02887e+08	5	6.3503e+08	5			2.99799e+08	6	1.91165e+08	5	3.63793e+08	6	2.58598e+08	4			3.59539e+08	5	5.37063e+08	6	4.86346e+07	3	2.44611e+07	2			2.54573e+08	5	1.42641e+08	5	3.71175e+08	6	4.95476e+08	6	2.48112e+08	4	2.85165e+08	5	1.14663e+08	4	2.9848e+08	5	1.97821e+08	5	4.99889e+08	6	2.88624e+08	5
expobiome_imp_47805100	6.45771e+07	1	1.56163e+08	2			3.09805e+07	1	1.13417e+08	1			2.65564e+07	1	4.18675e+07	1	1.36633e+08	1			7.65386e+07	1	2.61324e+07	1			8.34886e+07	1			9.64116e+07	1	1.60007e+08	1	5.71889e+07	1	7.99297e+07	1	5.1996e+08	3	6.58444e+07	1	6.44228e+07	1			6.2725e+07	1	6.05132e+07
expobiome_imp_47835172	1.04146e+07	1	4.54391e+07	2					1.13329e+08	3											9.66659e+07	2	1.05211e+08	3							2.92269e+07	1	8.16545e+07	3	8.79471e+07	2							4.81264e+07	3	4.95081e+07	3
expobiome_imp_58852807											3.9847e+07	2									5.44098e+07	2
expobiome_imp_65571493
expobiome_imp_65573191
expobiome_imp_65576747
expobiome_imp_65576751
expobiome_imp_65576755
expobiome_imp_65582006
expobiome_imp_65587044
expobiome_imp_65606244
expobiome_imp_65607670
expobiome_imp_65622872
expobiome_imp_65636138
expobiome_imp_65660362
expobiome_imp_65677148
expobiome_imp_65684066
expobiome_imp_65692034
expobiome_imp_65694748
expobiome_imp_65703141
expobiome_imp_65706345
expobiome_imp_65753339
expobiome_imp_65779856
expobiome_imp_65787389
expobiome_imp_65792909
expobiome_imp_65813190
expobiome_imp_65818726
expobiome_imp_65852311
expobiome_imp_65853625
expobiome_imp_65853626
expobiome_imp_65853788
expobiome_imp_65864038
expobiome_imp_65868723
expobiome_imp_65889927
expobiome_imp_65890759
expobiome_imp_65900082
expobiome_imp_65919306
expobiome_imp_65960145
expobiome_imp_65963193
expobiome_imp_65981376
expobiome_imp_66000088
expobiome_imp_66009607
expobiome_imp_66019336
expobiome_imp_66022570
expobiome_imp_66032564
expobiome_imp_66056420
expobiome_imp_66080944
expobiome_imp_66083259
expobiome_imp_66085860
expobiome_imp_66089912
expobiome_imp_66109637
expobiome_imp_66133875
expobiome_imp_66145116
expobiome_imp_66389896
expobiome_imp_68586619			5.11629e+08	1																							5.40558e+07	1	3.43218e+08	3									7.80599e+07	1							5.28236e+08	1
expobiome_imp_68586620			9.85574e+07	1	1.98253e+08	1
expobiome_imp_68632107							2.12652e+08	3																											3.47516e+07	1
expobiome_imp_68669500			1.24228e+09	5	8.49345e+07	1	1.9446e+08	5																			9.27645e+07	2	3.93401e+08	5					7.67574e+07	3											1.62909e+08	1
expobiome_imp_68726027
expobiome_imp_68748173			2.57781e+08	2			5.34328e+07	1																			1.09533e+07	1											2.81519e+07	1
expobiome_imp_68798412			9.94031e+07	1																																							6.37169e+07	1	9.80847e+07	1
expobiome_imp_68824416			1.03698e+07	1
expobiome_imp_68827284					2.28782e+08	3	4.15666e+07	1
expobiome_imp_69011762			7.63734e+07	2	4.79889e+08	4
expobiome_imp_71159727
expobiome_imp_73238345
expobiome_imp_74526488																							4.30941e+07	1
expobiome_imp_77082722
expobiome_imp_77107629
expobiome_smorf_00210979
expobiome_smorf_00249668
expobiome_smorf_00256194
expobiome_smorf_00362277
expobiome_smorf_00608438
expobiome_smorf_00912017
expobiome_smorf_01033701
expobiome_smorf_01138170																					5.90948e+06	1					5.70322e+06	1
expobiome_smorf_01143143																					7.51822e+06	1					1.04389e+07	1
expobiome_smorf_01148204																											1.50091e+08	1											7.55315e+07	1
expobiome_smorf_01164735
expobiome_smorf_01168706
expobiome_smorf_01198359
expobiome_smorf_01206736
expobiome_smorf_01238464
expobiome_smorf_01641737
expobiome_smorf_01846970
expobiome_smorf_01850539																																	1.58119e+07	1							7.13134e+07	2
expobiome_smorf_01859349
expobiome_smorf_01863488																																																	8.65386e+07
expobiome_smorf_01878128
expobiome_smorf_01889166															9.95239e+06	1					7.60406e+06	1													6.7295e+07	2
expobiome_smorf_01919646																					9.25959e+06	1																									5.39432e+07	2
expobiome_smorf_01935864
expobiome_smorf_01936650
expobiome_smorf_02150642			1.18228e+07	1																							1.52704e+07	1			6.83809e+06	1			1.54229e+07	1
expobiome_smorf_02151537													4.2737e+08	5	2.49939e+08	2					1.34271e+08	2					1.20073e+08	3	4.71854e+07	1					1.02069e+07	1					1.50761e+08	4	1.4198e+07	1			3.34604e+08	4	1.78976e+08
expobiome_smorf_02155371					8.87391e+08	4													4.619e+07	1	1.59132e+08	2			3.0847e+07	1							5.52797e+07	1							1.99978e+07	1
expobiome_smorf_02156198
expobiome_smorf_02159742			2.57233e+07	1
expobiome_smorf_02159785			1.08631e+08	3	2.12886e+08	4	4.72146e+08	5	2.91312e+08	4	1.05654e+09	8			4.01939e+08	3			3.74451e+07	2	4.15313e+08	4			9.00679e+07	4	5.65103e+08	6	6.27942e+08	5			3.3846e+08	6							3.41915e+08	5	4.41767e+08	5	2.93017e+08	4	1.28165e+09	7	4.34673e+08
expobiome_smorf_02159786					5.25549e+07	1	8.21263e+07	1			4.48047e+08	4					1.98468e+08	4					4.52971e+07	1			2.5755e+08	2					7.28789e+07	2	2.51818e+08	3	4.42125e+07	1	1.30979e+08	3	1.32262e+08	2	1.72043e+08	3	1.10853e+08	2	1.09116e+08	1	9.14635e+07
expobiome_smorf_02159787							9.95013e+07	1			7.99012e+07	1					1.61119e+08	1																							1.47433e+08	1							6.40693e+07
expobiome_smorf_02159788			9.60976e+07	2	1.04648e+08	1	3.45937e+08	4	1.97162e+08	3	3.66647e+08	1	3.08172e+08	3	4.33054e+08	4	6.39715e+08	3	4.62092e+07	2	3.19908e+08	3	3.00157e+08	3	5.82978e+07	3	3.92568e+08	3	2.56282e+08	1			2.9503e+08	3	3.10726e+08	3	1.42828e+08	3	2.98344e+08	3	1.828e+08	4	3.83313e+08	3	2.22342e+08	3	5.39656e+08	1	3.96623e+08
expobiome_smorf_02160008			1.7767e+07	1			2.11526e+07	1													1.88258e+07	1					2.02521e+07	1							1.63859e+07	1
expobiome_smorf_02160011			1.20305e+07	1
expobiome_smorf_02160111			1.48892e+07	1							5.43184e+06	1																									3.52683e+06	1
expobiome_smorf_02161250			7.8283e+08	2	6.78185e+07	1																																	1.53189e+08	4							3.86621e+07	1
expobiome_smorf_02164203			6.52584e+07	1	2.59699e+08	2	7.28249e+06	1																											1.12089e+07	1											7.76468e+07	2
expobiome_smorf_02164287			6.09799e+07	1	1.37333e+08	1			1.25254e+08	1	1.79002e+07	1			1.90449e+07	1							8.94007e+06	1			2.95662e+07	1			6.52135e+07	1			5.3484e+07	1													1.86526e+07
expobiome_smorf_02165241			9.84188e+08	3	3.48495e+08	2																																	2.9266e+08	4							5.85998e+08	2
expobiome_smorf_02165625					2.8739e+08	2	5.84376e+08	5
expobiome_smorf_02166959					4.83312e+08	2	3.9154e+08	3			6.02494e+08	5					4.48162e+07	1			5.45957e+08	3	1.49847e+09	4											2.587e+08	3	7.4181e+08	4							1.32266e+09	4
expobiome_smorf_02171183			1.47602e+07	1					8.47637e+06	1	1.48887e+07	1					1.93108e+07	1															1.00697e+07	1			1.46032e+07	1							1.92802e+07	1
expobiome_smorf_02171767			1.08411e+08	3			1.0585e+09	4	4.98025e+08	5	3.49541e+08	2	3.42427e+08	4	4.88597e+08	3			9.52434e+07	3	5.81938e+08	4			7.45511e+06	1	9.7853e+07	1	2.82906e+08	2			6.55709e+08	6	5.21924e+08	4					5.59425e+08	4	3.43504e+08	4	2.1647e+08	4
expobiome_smorf_02171794					8.90928e+07	1	2.85998e+07	1			2.98259e+08	5									5.62523e+07	1	1.28943e+08	2																					2.19e+08	3
expobiome_smorf_02174891			5.60516e+07	2			3.63876e+07	1	2.40258e+08	3	8.58601e+07	2	2.67809e+08	3			5.79242e+08	2	3.03515e+08	3	9.35908e+07	2	1.66328e+07	1	1.1591e+08	2	3.24122e+08	3			4.95117e+08	3	7.44574e+07	1			4.22111e+08	3	2.36828e+08	3	3.32394e+08	3	3.80305e+08	3	2.7247e+07	1			2.1783e+08
expobiome_smorf_02175766																																															1.00931e+07	1
expobiome_smorf_02176217			1.18024e+08	1	2.22297e+07	1																																									3.37012e+07	1
expobiome_smorf_02180409			2.64931e+08	1							2.30298e+08	1			6.94194e+07	1			3.05343e+07	1	2.41395e+08	1			1.741e+08	1					2.26181e+08	1			1.52089e+08	2	5.25896e+07	1	2.54747e+07	1			1.29553e+07	1					1.64673e+08
expobiome_smorf_02181195
expobiome_smorf_02183384							1.97528e+07	1													2.14746e+07	1					4.89759e+07	1							3.88927e+07	1
expobiome_smorf_02185740			7.85004e+06	1											9.91038e+07	2																	2.47472e+07	2					4.23872e+07	1							8.96328e+07	2	1.76258e+08
expobiome_smorf_02186036			5.4368e+07	2	9.34746e+07	3					7.31302e+07	2									2.15935e+07	1							1.12391e+07	1			6.13972e+07	2	2.91129e+07	1					1.06288e+08	3			1.97156e+08	3			7.64381e+07
expobiome_smorf_02187003			5.81701e+07	3											6.57312e+07	3							4.96058e+07	2					3.40352e+07	2									3.9216e+07	3			8.6684e+07	3	1.52186e+07	1	3.83416e+07	2
expobiome_smorf_02189611			2.54419e+08	3	2.07684e+07	1			1.42225e+08	2	5.81233e+08	8	2.43934e+08	4	2.3653e+08	4			3.63556e+07	1	2.77853e+08	3	2.49006e+08	2	4.32735e+07	2			1.78085e+08	3			3.31312e+08	5	4.26062e+08	5	1.52886e+08	3	2.83863e+08	5	6.35408e+08	6	3.82772e+08	4	1.54046e+08	3	8.65442e+08	5	1.00967e+09
expobiome_smorf_02190372							9.28173e+07	1
expobiome_smorf_02190456
expobiome_smorf_02190649
expobiome_smorf_02190833			1.79131e+07	1			2.1297e+07	1													4.49806e+07	1					2.2318e+07	1			4.71565e+07	1			2.99063e+07	1
expobiome_smorf_02191164			2.17704e+07	1	2.06247e+07	1	1.51925e+07	1	1.04157e+07	1					1.56125e+07	1					1.11477e+08	3			1.7787e+08	4					4.14742e+07	2	2.11158e+08	4			2.604e+07	1	7.62842e+07	2					2.63456e+07	1			1.04471e+08
expobiome_smorf_02191992							2.58154e+06	1																									1.75323e+07	1
expobiome_smorf_02192493									5.73641e+07	1	6.51911e+07	1											1.94775e+08	1							7.29114e+07	1									8.77282e+07	1
expobiome_smorf_02193609							2.58345e+07	1							2.87218e+07	1	1.30472e+08	2													9.24873e+07	2									1.38701e+08	3					9.45594e+07	2	5.05744e+07
expobiome_smorf_02193613			1.45918e+07	2			7.57951e+07	3			5.28879e+06	1					1.26799e+09	4			3.71438e+06	1									4.65665e+07	3			5.65853e+06	1	3.93952e+07	4	1.90456e+06	1	3.56569e+08	4	1.02835e+07	2					1.92673e+08
expobiome_smorf_02195593			2.6585e+08	5			1.39965e+08	5	6.35958e+08	7	2.85477e+08	6	4.69243e+08	6	5.63671e+08	5	1.69191e+09	3	5.36508e+08	6	4.38869e+08	6	1.28618e+08	5	2.88959e+08	4	7.51636e+08	6	1.33424e+07	1	1.38087e+09	6	2.23667e+08	5	5.27055e+08	6	6.4926e+08	6	3.66311e+08	4	5.359e+08	4	6.92768e+08	6	6.50672e+07	3	1.98463e+08	6	3.39652e+08
expobiome_smorf_02198776			4.86038e+07	2																																							1.48407e+07	1
expobiome_smorf_02199090			3.42617e+07	2			3.79953e+07	2	3.36777e+08	4	4.79488e+07	2	2.92723e+08	4	3.0182e+08	4	3.82947e+08	3	2.32838e+08	3	1.83956e+08	3	3.33402e+07	2	8.99024e+07	2			4.24824e+06	1	4.9198e+08	4	1.08686e+08	3	2.47841e+08	3	2.42981e+08	3	1.10421e+08	2	1.71699e+08	3	3.60151e+08	3	2.45843e+07	3	4.49137e+07	3	1.55734e+08
expobiome_smorf_02200102			3.52332e+08	3			3.4785e+08	3	1.55056e+08	3	1.02974e+08	2	1.92063e+08	3	5.56348e+07	2	4.37974e+08	4	1.5798e+08	2	9.43143e+06	1					1.67842e+08	3			1.20292e+08	2	2.38224e+06	1	2.31321e+08	3			5.65106e+06	1			4.76855e+07	1			1.59311e+08	3
expobiome_smorf_02200728																																									4.00373e+07	1	1.07798e+07	1
expobiome_smorf_02204157			4.17352e+08	2	5.21043e+07	1			1.53498e+08	2	4.34748e+07	1	4.33294e+07	1	1.51835e+08	1					3.6631e+07	1	5.08955e+07	2	1.47244e+08	2					1.67363e+08	2			3.47914e+08	2	2.70523e+08	3	7.36362e+07	2	4.89273e+08	4	1.42931e+08	2			1.43787e+08	2	4.88711e+08
expobiome_smorf_02204726					7.70953e+07	3	3.62327e+07	1
expobiome_smorf_02205755																											8.385e+07	3
expobiome_smorf_02207567													8.05717e+06	1
expobiome_smorf_02208306			3.70809e+07	2			3.67646e+07	1													7.16865e+07	2					1.47916e+08	4			9.87328e+06	1			3.58191e+07	2
expobiome_smorf_02210352			1.75029e+07	1																											2.0682e+07	1											1.88431e+07	1	1.34704e+07	1
expobiome_smorf_02212106			1.44353e+07	1	1.20258e+08	2	1.76778e+08	2	7.29646e+07	2			1.03781e+08	2							7.63084e+07	2			1.86467e+07	1	7.91019e+07	2					2.53116e+07	1	1.00086e+08	2			1.03669e+08	2	1.12681e+08	2							4.7416e+07
expobiome_smorf_02213790																																									2.36082e+07	1
expobiome_smorf_02215127			5.47597e+07	1	5.91129e+07	1	2.11577e+08	2	7.71346e+07	2	2.77864e+08	1	1.38645e+08	2	2.37791e+08	1	1.85624e+08	1			1.43587e+08	2	1.03114e+08	1			1.92826e+08	1	1.04137e+08	1			1.30367e+08	2	1.43052e+08	1	6.7536e+07	2	1.2864e+08	1	1.33093e+08	2	1.52179e+08	1	9.54808e+07	2	3.68003e+08	1	2.23572e+08
expobiome_smorf_02216175
expobiome_smorf_02217220			2.6388e+08	2	1.28886e+08	1	6.84112e+07	1	3.51962e+07	1	3.71916e+08	2	1.50575e+08	1	2.22537e+08	3	3.34027e+08	3					1.61179e+08	1			3.66541e+08	1	1.01179e+07	1	2.23233e+08	1	5.36457e+07	1	4.25012e+08	3	1.64756e+08	1	5.3333e+08	2	3.73277e+08	2	4.46437e+08	2	2.74734e+07	1	1.10956e+07	1	3.31255e+07
expobiome_smorf_02218358			7.35857e+07	3			2.2978e+08	3	2.26366e+08	4	5.24848e+08	4			2.8542e+08	2	1.92507e+08	2	2.88208e+07	2			2.37466e+08	3	2.31936e+07	1	3.66068e+08	4	1.56448e+07	2					3.08345e+08	4	4.44424e+07	2	2.56789e+08	4	2.37352e+08	3	3.20643e+08	4	1.57833e+08	3			3.98691e+08
expobiome_smorf_02219888			6.68649e+07	1					3.54181e+07	1			2.43171e+07	1	1.85591e+08	2											4.00447e+07	1			1.09271e+08	3											6.95807e+07	2			4.79111e+07	1
expobiome_smorf_02220307			2.35124e+08	3	1.79808e+08	3	2.4037e+08	5																											6.92391e+08	6							6.6584e+07	3			3.48542e+08	4
expobiome_smorf_02220457			2.93493e+07	1					2.69149e+07	1							1.29641e+08	2			3.18745e+07	1	2.27984e+07	1					2.60098e+07	1	3.83192e+07	1			3.08038e+07	1			1.19417e+08	2	7.04531e+08	4	1.09099e+08	2	4.84606e+07	1
expobiome_smorf_02220923			1.25245e+08	1																																			5.85607e+06	1
expobiome_smorf_02221054			2.556e+08	4			6.21434e+08	4	8.10427e+07	2	4.45467e+08	4													4.84278e+08	4			7.63782e+07	2
expobiome_smorf_02558852																																			4.74357e+07	1
expobiome_smorf_02567115											4.70647e+07	1
expobiome_smorf_02576372					7.80829e+07	2			1.48657e+07	1																	6.58522e+06	1					5.30526e+06	1															7.05434e+07
expobiome_smorf_02578667
expobiome_smorf_02586459
expobiome_smorf_02590146
expobiome_smorf_02592834											4.5627e+07	2											9.37174e+07	2															1.94782e+07	1					2.40238e+07	1
expobiome_smorf_02605976																																			9.5562e+07	2
expobiome_smorf_02607990																							1.56597e+08	2													5.38083e+06	1
expobiome_smorf_02609845																											2.62809e+07	1																	8.12612e+07	1
expobiome_smorf_02610574									1.07932e+07	1							1.54379e+08	2																	1.54095e+07	1							5.72393e+06	1
expobiome_smorf_02614300					2.71015e+07	1					2.01186e+08	3									5.75199e+07	1															1.39951e+08	3	4.86114e+07	2
expobiome_smorf_02614302											6.06799e+07	2																									2.83649e+07	1	2.3639e+07	1
expobiome_smorf_02821741			1.1085e+07	1													1.51742e+08	2																							7.97229e+07	2
expobiome_smorf_02822366			2.78053e+07	1	4.56931e+07	1					2.32179e+07	1	1.36292e+07	1									1.60459e+07	1	2.98925e+07	1	1.52452e+07	1	1.07494e+07	1			4.13684e+07	1	6.33267e+07	1			3.50632e+07	1	3.07033e+07	1	1.77554e+07	1	7.48065e+07	1	1.47402e+07	1	3.27764e+07
expobiome_smorf_02824177	2.14201e+08	1	1.0734e+08	1			1.23099e+08	1	4.30106e+08	1					2.02506e+08	1	2.18224e+08	1			3.29942e+08	1			6.81681e+07	1	2.84521e+08	1			7.16193e+07	1	2.58857e+08	1	8.82598e+07	1			7.65271e+08	2	1.04297e+08	1	2.04509e+08	1			2.62747e+08	1	1.17656e+08
expobiome_smorf_02824178	3.18245e+08	4	8.94424e+07	2					3.65792e+08	3							1.61607e+08	2			6.73756e+06	1	1.25477e+07	1							2.4943e+08	5			1.23e+08	2							3.44019e+07	1	1.84007e+07	1
expobiome_smorf_02825699															7.24359e+07	1																											1.17353e+08	1					1.19116e+08
expobiome_smorf_02825734			2.43555e+08	6	2.31504e+08	5	1.01295e+08	4	4.11607e+07	2			1.21019e+07	1	1.2549e+07	1					3.64664e+07	2					4.48204e+07	2					2.55739e+07	2	7.60345e+07	3					1.58412e+08	5	4.88327e+07	3			1.44191e+07	1	2.82112e+07
expobiome_smorf_02826279	5.50325e+08	4	3.30996e+08	2	6.43187e+08	3	2.38633e+08	4	7.64896e+08	5	8.88669e+08	6	3.36556e+08	4			4.43306e+07	1	4.54631e+08	3	1.82831e+08	2	8.94622e+08	4	1.22049e+08	2	7.55906e+08	4	4.14695e+08	4	3.50528e+08	3	3.36881e+08	5	1.342e+08	2	4.10347e+08	4	8.68626e+08	6	5.23623e+08	4	1.68733e+08	2	4.36019e+08	3	1.97984e+08	2	4.18957e+08
expobiome_smorf_02826388	2.46334e+08	1	1.69759e+08	1	2.3657e+08	2	5.62884e+07	2	3.16381e+07	1	3.15597e+08	4	1.31787e+08	1	1.91056e+08	1	2.92172e+08	2	1.45772e+08	1	2.92296e+07	1	2.14823e+08	1	1.23124e+07	1	2.11413e+08	1	2.1635e+08	1	2.34443e+08	1			1.47133e+08	1	2.00844e+08	1	2.14259e+08	1	2.28044e+08	2			1.48272e+08	1	1.61866e+08	1	2.18298e+08
expobiome_smorf_02826975											4.97715e+06	1													8.84248e+06	1											8.40958e+06	1			1.83186e+07	1
expobiome_smorf_02827500			3.99231e+07	3			5.53196e+06	1			2.88363e+07	1					6.31005e+06	1									1.40918e+07	2							1.16238e+07	1									5.09619e+06	1
expobiome_smorf_02827524	2.27543e+07	1									5.43212e+06	1					8.34401e+06	1			3.52885e+07	2	8.70407e+06	1							1.24662e+07	1	2.33535e+07	1	8.33788e+06	1	1.18787e+07	1	2.52178e+07	1	1.08875e+07	1					1.01332e+07	1
expobiome_smorf_02828117			3.0001e+07	1	2.49296e+07	1			2.32193e+07	1	7.07296e+07	2					2.03815e+08	3	2.52193e+07	1			1.03766e+07	1	1.40588e+07	1	2.06599e+07	1			1.28525e+08	3	2.21922e+07	1	2.03686e+07	1	2.85377e+07	1	2.17618e+07	1							1.67498e+07	1	6.19692e+07
expobiome_smorf_02828797	5.33766e+07	2	1.53961e+07	1							4.52393e+07	2					2.18966e+08	4					1.91644e+08	4	6.69865e+07	2	8.92925e+07	2			1.03973e+08	3	4.07035e+07	1	4.15542e+07	2	1.51636e+08	3	2.66042e+07	2	1.71306e+08	5			6.01687e+07	2
expobiome_smorf_02829324																																													7.65181e+07	2
expobiome_smorf_02830021					9.00644e+06	1															2.28575e+07	1	3.07927e+07	1			2.92707e+07	1							1.51959e+07	1
expobiome_smorf_02830406			1.46467e+07	1							2.80334e+07	1					8.15463e+07	2																	7.99526e+06	1
expobiome_smorf_02830494	5.69951e+08	1			5.79015e+07	1					6.88995e+08	1	6.8894e+08	1			2.9272e+07	1					5.77713e+08	1									7.54306e+08	1	3.01601e+08	1					2.05013e+07	1					8.23162e+07	1	4.25325e+08
expobiome_smorf_02830525					1.27306e+07	1	3.47524e+07	2	1.98655e+08	1			1.18891e+08	1	6.53032e+07	1							4.30325e+07	1			1.60357e+08	2			4.33519e+06	1					4.70078e+07	1	4.16864e+07	1			3.88266e+07	1
expobiome_smorf_02830533			7.8992e+07	2																							9.98493e+06	1	1.44647e+07	1	4.41252e+07	2									4.3957e+08	5			3.11524e+07	2	1.82829e+07	1	3.22885e+07
expobiome_smorf_02831484			9.20273e+07	2					5.4744e+07	2	7.21091e+07	2													2.13842e+08	4	8.17412e+07	1											7.40608e+07	1
expobiome_smorf_02831778																	3.25262e+07	3					1.02257e+08	2			2.08453e+07	1			1.19747e+07	1					1.12888e+08	2							2.10812e+07	1
expobiome_smorf_02832159	2.47082e+08	2							2.0917e+08	2	3.61625e+08	3	5.99975e+08	4	1.32482e+08	1	1.20088e+08	3					8.23979e+07	2	1.88119e+07	1	1.4587e+08	1			2.77374e+08	3	3.09612e+07	2	5.58944e+07	1					5.44591e+07	1	4.36187e+08	3	1.43306e+08	2
expobiome_smorf_02832180			4.71566e+07	1	4.78731e+07	1	3.41096e+07	2			5.19633e+07	1	2.23729e+07	1											1.64142e+07	1	1.28909e+07	1							2.29396e+07	1			1.94296e+07	1	3.36591e+07	1	2.2241e+07	1	2.40315e+07	1			5.78145e+07
expobiome_smorf_02832245																	1.55308e+08	2					1.76755e+07	1	8.87566e+07	2							8.66365e+07	2											7.24598e+07	1
expobiome_smorf_02832908			2.52339e+07	1	3.733e+07	1	1.30973e+07	1	1.00357e+07	1	4.70795e+07	1	1.85991e+07	1	4.81395e+07	1			1.48379e+07	1	7.12487e+06	1	2.58514e+07	1	1.05939e+07	1	1.41072e+07	1	1.53616e+07	1					1.79152e+07	1	4.71491e+07	1	1.02132e+07	1	3.45055e+07	1	2.06935e+07	1	1.72019e+07	1	2.12503e+07	1	2.00511e+07
expobiome_smorf_02833333	2.13438e+08	1	9.33287e+07	1	3.106e+07	1	3.64965e+07	1	3.26162e+08	2	4.40065e+07	1	1.80384e+08	2	2.55758e+08	2	2.46092e+08	2	9.63141e+07	1	1.34461e+08	1	9.7952e+07	2	1.20407e+08	2	1.19963e+08	1							2.48195e+08	2	2.32648e+08	1	9.55632e+07	1	1.13286e+08	2	8.23985e+07	1	1.32299e+08	2	2.25313e+08	1	1.67479e+08
expobiome_smorf_02833431			6.03984e+06	1	1.83824e+08	2	3.74272e+08	3							2.58341e+08	1			1.06265e+08	2	5.09656e+08	4					4.89591e+06	1	5.72502e+07	1			1.17163e+07	2			4.02217e+08	4	1.83046e+08	3	7.30152e+08	3	8.99745e+07	1	1.45322e+08	3			5.26497e+08
expobiome_smorf_02833911	4.68679e+08	5	1.33323e+08	3			1.99805e+08	4	3.36713e+08	5	1.75821e+08	4	2.03005e+08	5	2.45714e+08	4	2.2645e+08	3	1.75511e+08	4	2.11332e+08	4	5.08347e+07	3	1.20191e+08	3	2.99734e+08	4	3.8816e+07	2					2.91308e+08	5	4.91125e+08	5	1.82523e+08	4	1.97806e+08	4	1.67524e+08	4	1.80256e+08	5	3.69297e+08	5	6.21899e+08
expobiome_smorf_02834183													1.30322e+08	1					8.06417e+07	1													6.33535e+07	1	2.94692e+07	1					1.95516e+08	1
expobiome_smorf_02834729			4.10547e+07	2					3.57954e+07	3					3.50777e+07	1	9.58193e+07	2	9.56994e+07	3	1.99405e+07	2					1.20101e+07	1							2.08134e+07	2			1.38646e+08	4					2.67579e+07	2
expobiome_smorf_02834733
expobiome_smorf_02834789			8.81198e+07	2	1.02154e+08	2	4.56475e+07	1	1.10378e+07	1							7.25768e+07	2															3.23968e+07	1	4.15653e+07	2					3.97228e+07	1
expobiome_smorf_02835986	2.79351e+08	4	2.10732e+08	3	1.31435e+08	2	2.47723e+07	1	2.79601e+08	2			3.15603e+08	4	1.31042e+08	1			3.3038e+07	1			2.08144e+08	4			1.74068e+08	3			3.45385e+07	1	1.37697e+08	4					8.05933e+07	2					2.21662e+08	2	1.48835e+08	2
expobiome_smorf_02836437
expobiome_smorf_02836509	2.34501e+08	3	2.53336e+08	3			1.34411e+08	2	4.07265e+08	3	7.77182e+07	2	5.80239e+07	2	1.13189e+08	3	3.15513e+08	3			1.66771e+08	2	4.31809e+07	2	2.52314e+07	1	3.95527e+08	3			1.32057e+08	3	6.15569e+08	5	1.28663e+08	3	1.62047e+08	3	4.72105e+08	4	2.20182e+08	3	3.22673e+08	3	2.23493e+07	1	8.04673e+07	2	1.93815e+08
expobiome_smorf_02836886			2.28147e+08	1	3.06622e+08	2	1.64563e+08	2	2.62939e+08	2	9.34865e+07	2	1.07857e+08	1	1.22939e+08	1			6.65921e+07	1			8.3666e+07	2	8.01797e+07	1	2.97567e+08	2	5.64774e+07	1	2.35862e+08	2	4.4002e+07	1	2.35236e+08	2	8.26973e+07	2	1.54814e+08	2	9.18596e+07	1	9.37932e+07	2	1.35302e+08	1	8.65494e+07	1	6.53796e+07
expobiome_smorf_02837907	9.63125e+08	5	9.19704e+08	3	3.44179e+08	1			7.3556e+08	5	8.04343e+08	4	3.59677e+08	3	3.54655e+07	1	2.95613e+08	4	2.27818e+08	3	2.40372e+08	3	4.35542e+08	3	4.76052e+08	3	2.15903e+08	3	8.40155e+07	1	3.33791e+08	3	6.79621e+08	5	5.878e+08	4	9.81653e+07	1	2.87367e+08	3	3.03311e+08	3	2.49725e+08	3	4.87069e+08	3	2.86497e+08	3	3.16321e+08
expobiome_smorf_02837908	5.17917e+07	1	2.65018e+08	2	1.52681e+07	1			1.34273e+08	2			6.56344e+07	2	6.69703e+07	2	2.60282e+08	4	9.72781e+07	2	4.43786e+07	2	1.02111e+08	2							3.28481e+07	1	2.57165e+08	2	1.81794e+07	1					7.03897e+07	2			4.96004e+07	2	3.68925e+07	2	1.41287e+07
expobiome_smorf_02838069	3.2658e+09	6	2.30205e+09	6	2.68076e+09	5	1.73365e+09	6	1.20997e+09	5	3.13741e+09	6	1.86573e+09	5	1.6979e+09	6	2.10849e+09	3			2.35318e+09	6	2.44982e+09	6	2.44164e+09	5	2.5189e+09	6	1.49544e+09	5	3.77975e+09	6	3.21698e+09	6	1.93542e+09	6	3.14351e+09	6	3.00094e+09	6	2.99335e+09	6	1.12779e+09	4	2.05963e+09	5			2.42217e+09
expobiome_smorf_02839711													6.87597e+07	2	2.37186e+07	2							8.18251e+06	1							1.14709e+07	1			3.45072e+07	2	8.54243e+07	3							5.98454e+07	2	3.42942e+07	2
expobiome_smorf_02839744	2.1751e+07	2									4.84473e+07	2																			2.01197e+08	4			3.50589e+07	2									8.58932e+07	2
expobiome_smorf_02839790	5.58969e+07	1			8.11314e+07	1			5.0093e+07	1	9.90774e+07	1	4.01958e+07	1					5.48256e+07	1			9.27782e+07	1			1.49281e+08	3	7.55775e+07	1	2.38109e+07	1	3.38151e+07	1			3.08913e+07	1	1.92593e+07	1
expobiome_smorf_02841069					2.07676e+08	4											1.38101e+09	6							1.32592e+07	1																					1.3619e+07	1
expobiome_smorf_02841274			1.76386e+07	1					9.11848e+06	1	1.79679e+07	1					1.06895e+07	1					4.48538e+07	1	8.74515e+07	2	9.69228e+07	2			3.34595e+07	2	3.60615e+07	1	1.44298e+07	1	2.60976e+07	1	1.09983e+07	1	3.90713e+07	1			3.01657e+07	2			2.06976e+07
expobiome_smorf_02843773	1.384e+08	2	5.19065e+07	1	2.66522e+07	1	1.81357e+07	1					5.27732e+07	1	1.71353e+08	2	4.48668e+08	5	4.89306e+07	2	2.76778e+07	2			9.93645e+07	2	1.68227e+08	2	1.38772e+08	2							6.06266e+07	2	1.34295e+08	3	1.006e+07	1					6.74559e+07	2
expobiome_smorf_02844212			6.35949e+07	1											3.19785e+07	1																					8.75618e+07	2									3.68027e+07	1	3.77662e+07
expobiome_smorf_02844213	1.16815e+08	3	8.83258e+07	3	4.8834e+06	1									2.96645e+07	2																					1.28684e+08	3									9.86338e+06	1	4.91877e+07
expobiome_smorf_02844214
expobiome_smorf_02845250					2.52884e+08	3	6.63835e+08	5							5.30242e+08	5			1.25494e+08	2	9.82411e+08	6			2.57002e+07	1			6.76915e+07	1	8.48663e+08	6	7.62419e+07	3			7.68752e+08	5	5.05971e+08	5	8.40209e+08	7	2.35712e+08	4	2.78857e+08	5			7.99375e+08
expobiome_smorf_02845595			2.25783e+08	3	2.73299e+08	4					2.31824e+07	1			3.89684e+08	4					4.16735e+08	5			5.32018e+07	2					2.09349e+08	4			4.66042e+08	5	9.68928e+07	3											7.12903e+07
expobiome_smorf_02846494	1.2473e+08	1					9.71459e+07	1	8.44379e+07	1	3.8066e+07	1	6.1441e+07	1	1.23764e+08	1	1.06339e+08	1	4.95107e+07	1	1.41034e+08	1	1.62599e+07	1	5.60099e+07	1	7.41913e+07	1	2.78928e+07	1					1.91413e+08	1	1.58189e+08	2	9.90859e+07	1	7.11943e+07	1	6.64175e+07	1	4.86476e+07	1	1.87367e+08	1	2.59017e+08
expobiome_smorf_02847043			1.67645e+08	1	6.80182e+07	1	7.74598e+07	1	4.00639e+07	1	1.86725e+08	2	2.6591e+08	1	6.49701e+08	2	4.96798e+08	2			5.53751e+07	1	1.19238e+08	1	1.7028e+08	1	2.2644e+08	1			1.52478e+08	1			4.03943e+08	2	1.52662e+08	1			1.92308e+08	1	3.13837e+08	1
expobiome_smorf_02847328	7.19023e+07	1	8.01686e+07	1			3.71595e+07	1	1.12816e+07	1	1.2059e+08	2	1.36754e+07	1	4.19511e+07	1	1.22888e+07	1	8.68128e+06	1			2.51828e+07	1	2.24078e+07	1	4.32067e+07	1	9.95267e+06	1	5.65693e+07	1	7.10363e+07	1	2.69109e+07	1	2.9113e+07	1	3.00865e+07	1	4.00899e+07	1	1.74406e+07	1			5.1531e+07	1
expobiome_smorf_02847806	1.17675e+09	7	7.09074e+08	4	3.7186e+07	1			1.10551e+09	3	3.5984e+08	3	5.63948e+08	4	7.8126e+08	4	1.1967e+09	4	3.14911e+08	3	3.07978e+08	3	3.3578e+08	3	3.82438e+08	3	2.50531e+08	3	8.58438e+07	2	2.63522e+08	3	6.79768e+08	3	7.11719e+08	3	4.57143e+07	1	3.49008e+08	4	9.48478e+07	1	3.41837e+08	3	3.18529e+08	3	3.21794e+08	3
expobiome_smorf_02847809	1.36252e+08	2	2.29437e+08	4	2.04316e+08	3			3.52018e+07	1	4.57629e+08	5	7.15374e+07	2	1.34025e+07	1	4.09449e+08	6	1.72818e+08	2	6.17457e+07	2	1.31681e+08	2	7.21988e+07	2	1.34726e+08	3	3.02924e+07	1	4.4086e+08	4	9.5295e+07	2	6.5849e+07	2	2.66632e+08	4	1.70452e+08	4	3.66024e+08	5			1.05725e+08	2	7.50681e+07	2	2.1613e+08
expobiome_smorf_02848243							1.91538e+07	1	2.92364e+08	4	2.28141e+08	1					6.80683e+08	4	1.53112e+08	1			4.64484e+08	4	3.65859e+08	6	3.78129e+08	4					5.76825e+08	7	2.49841e+08	2	4.41591e+08	4	4.19622e+08	4							3.87882e+08	2	4.29703e+08
expobiome_smorf_02848542			1.71636e+07	1					1.78271e+07	1	1.41761e+07	1	1.15992e+07	1	1.481e+07	1	3.88996e+07	1					2.56771e+06	1	2.21568e+07	1	1.11082e+07	1			9.13056e+07	2	9.57453e+07	2	2.94135e+07	1					1.01619e+07	1	2.06397e+07	1	9.68317e+06	1	7.21716e+06	1	6.65969e+07
expobiome_smorf_02848668			4.9614e+07	1	1.22537e+07	1	5.49861e+07	1			1.26795e+08	1	2.07832e+07	1	1.16432e+07	1	2.39942e+08	1			6.39988e+06	1			9.49318e+06	1	8.89055e+06	1			1.90786e+07	1	6.1911e+06	1	5.10203e+07	1	2.00646e+07	1	2.35134e+07	1	3.02125e+08	1	1.69767e+07	1			4.02435e+06	1	2.19182e+07
expobiome_smorf_02848855	1.05791e+08	2			2.01145e+07	1	5.61727e+07	2			1.01302e+08	2	2.9112e+07	1			2.08278e+08	2					5.88143e+07	1			1.75601e+08	2			2.22511e+07	1	2.34512e+08	2											6.41022e+07	2
expobiome_smorf_02849720			1.30124e+09	4	1.80854e+08	4	3.03811e+08	4	1.75724e+08	4											2.50185e+08	4	1.33685e+08	3							2.91314e+08	4	8.23746e+08	5	1.98606e+08	4					5.13597e+08	4			4.55395e+08	4			4.2528e+08
expobiome_smorf_02849820	2.84201e+07	1	3.93177e+07	1							3.63794e+07	1																			2.83494e+07	1			2.96162e+07	1			2.11123e+07	1			4.64915e+07	2	2.42812e+07	2
expobiome_smorf_02850042					1.02841e+08	2					2.99294e+07	1									5.20018e+07	1	2.17077e+07	1					3.04385e+07	1			6.70735e+07	1	1.61552e+08	3			6.67167e+07	2	8.25329e+07	2	1.40289e+07	1			1.88715e+07	1	4.03391e+07
expobiome_smorf_02850372			3.81277e+07	1	4.89281e+07	1	3.39889e+07	1	1.85344e+07	1	5.94299e+07	1	2.16563e+07	1	1.44673e+07	1							3.22999e+07	1			3.13644e+07	1	1.5267e+07	1	4.98085e+07	1			1.55567e+07	1	1.10966e+07	1			3.2448e+07	1	3.46182e+07	1	7.29079e+07	1	9.22729e+07	1	3.95809e+07
expobiome_smorf_02850494			1.70272e+07	2	4.6309e+07	2					5.73202e+07	2			1.50027e+07	1																			1.81538e+07	1					3.64226e+07	1							4.15493e+07
expobiome_smorf_02851460	4.41577e+07	2	2.13312e+08	4					2.27509e+08	4	2.75665e+08	2	6.89284e+08	5	2.3276e+08	1			7.69563e+07	1	1.56374e+08	3	3.24526e+08	4	2.06059e+08	4	3.46937e+07	2					7.37431e+08	5	1.2127e+08	3			1.55796e+07	1	2.14291e+08	2	2.98795e+08	5	4.2112e+08	5			6.5379e+07
expobiome_smorf_02851464			8.35535e+08	6			2.66225e+07	1							1.27245e+08	1					1.80925e+08	1	2.97771e+08	4							1.76264e+08	1	1.48567e+09	6	2.56623e+08	2					3.58041e+08	2	1.63828e+08	1					1.8045e+08
expobiome_smorf_02851465			9.39944e+07	1					4.91444e+07	1			4.7835e+07	1			1.22216e+08	1					1.75346e+07	1									7.30597e+07	1									2.38409e+07	1	4.57907e+07	1
expobiome_smorf_02851772			2.14868e+07	1					3.88641e+07	1					5.8877e+07	1	1.31177e+08	1	1.30114e+07	1	1.44998e+07	1					1.14107e+07	1	2.94639e+07	1	9.0704e+07	2			4.49247e+07	1			6.2084e+07	1			2.50493e+07	1	1.45998e+07	1	2.83936e+07	1
expobiome_smorf_02851788			4.38031e+07	1	4.47998e+07	1			6.16892e+07	1	7.99343e+07	2			5.10275e+07	1	1.02413e+08	1					1.13459e+08	1											5.12674e+07	1			8.41725e+07	2	7.78877e+07	1							3.70593e+07
expobiome_smorf_02852512																	1.32806e+08	1																							4.70385e+07	1							2.2988e+07
expobiome_smorf_02853069	9.30673e+07	3	2.90255e+07	1					5.51804e+07	2	5.97922e+06	1	3.13638e+07	1			5.83379e+08	5					6.64023e+07	2	1.64507e+08	3	1.31159e+08	3			8.06824e+07	2	7.82634e+07	2	4.09068e+07	1					2.20264e+08	4			8.2036e+07	2			5.81416e+07
expobiome_smorf_02853210																																	2.56048e+07	1			1.09247e+07	1
expobiome_smorf_02853467	2.82655e+08	6	5.4228e+08	6	2.05773e+07	1			2.39864e+08	6	5.47721e+08	8	7.93273e+07	3	5.77512e+07	5	8.03777e+08	11	1.1882e+08	4	9.28333e+07	4	2.24169e+08	5	1.09881e+08	5	8.01317e+07	3	1.31669e+07	1	1.75029e+08	5	2.89462e+08	6	2.25353e+08	6	4.40137e+07	3	1.18965e+08	4	1.29787e+08	5	1.77709e+08	4	2.20092e+08	5	7.77717e+07	3	8.94656e+07
expobiome_smorf_02853507			4.42176e+08	2					7.69515e+07	1	7.73497e+08	2	3.8359e+08	2			7.54063e+08	2	3.21739e+07	1			2.58712e+08	1	2.71228e+08	2	5.48159e+08	2	4.58977e+07	1	2.54335e+08	2	2.45498e+07	1	9.2257e+08	3	3.34739e+08	2	8.30389e+08	2	5.43659e+08	2			3.05261e+07	1	4.13636e+07	1	8.34921e+07
expobiome_smorf_02853682					8.75207e+06	1			1.51392e+08	2	3.24073e+07	1			6.35672e+07	1	1.07249e+08	2					1.58993e+08	2			6.06778e+07	1									5.22446e+07	1	1.2005e+08	2							3.9202e+07	1
expobiome_smorf_02854571	1.86337e+08	3	3.01829e+08	5	3.98013e+07	2			4.32778e+08	5	1.70115e+08	3			5.41509e+08	5	7.01821e+08	5	9.34127e+07	3	2.67718e+08	3	7.31055e+08	5	6.43545e+08	5	4.23603e+08	5			1.07625e+08	2	3.93272e+08	5	3.09558e+08	5			2.52537e+08	4	9.37413e+07	3	1.97663e+08	3	2.71312e+08	3	3.41894e+08	5	2.74092e+08
expobiome_smorf_02855705			9.38622e+08	6	2.36235e+08	3	2.1342e+08	4	1.1596e+07	2	1.29074e+09	9	3.78287e+08	5	4.20853e+08	4	2.02541e+09	10			1.01168e+07	2	1.38649e+08	4	2.27604e+08	5	4.90715e+08	6	1.72636e+07	2	3.46638e+08	3	2.32152e+07	2	9.7644e+08	6	3.53708e+08	6	6.12471e+08	8	8.65422e+08	6	5.02918e+08	5	9.38443e+06	1			5.27709e+07
expobiome_smorf_02855940					4.80421e+07	1	1.09806e+08	1							1.89927e+08	2			4.4164e+07	1	2.60469e+08	2							2.3253e+07	1	1.55701e+08	2					1.61864e+08	1	8.39405e+07	1	3.8316e+08	3	3.09431e+07	1	7.87074e+07	2			1.06928e+08
expobiome_smorf_02856355					2.76655e+07	1					1.34731e+08	2	5.7191e+07	1	7.06404e+07	2					2.13423e+07	1					5.80014e+07	1			4.62174e+07	1			1.90434e+08	2	6.77116e+07	2	1.59121e+08	2	1.60771e+08	2							9.13256e+06
expobiome_smorf_02856739			9.20521e+07	1	3.82582e+07	1					5.92714e+07	2																			1.58709e+08	1			2.14924e+07	2	4.26081e+06	1			2.54926e+07	1	2.67958e+07	1					2.73875e+07
expobiome_smorf_02858553									5.30523e+07	1					2.40492e+07	1	3.37165e+07	1	2.55677e+07	1	2.98002e+07	1											3.27697e+07	1													5.56934e+07	1
expobiome_smorf_02858824	1.61207e+08	4					8.51445e+07	3	1.45975e+08	4	3.38583e+08	4	4.35611e+08	6	7.71515e+07	3	1.50266e+08	4	1.85268e+08	4			8.3025e+07	3	2.31213e+07	2	1.86604e+08	5	5.56633e+06	1	3.23133e+08	4	2.64401e+08	5	9.39006e+07	3					2.98724e+07	1	1.95105e+08	5	4.36047e+07	2
expobiome_smorf_02858937			2.91968e+07	1	5.65845e+07	1	1.77943e+07	1			6.21531e+07	2							1.46867e+07	1					1.0907e+07	1	1.32511e+07	1													7.27294e+07	2			3.31429e+07	1			3.52914e+07
expobiome_smorf_02859490	2.71574e+08	2	1.79441e+08	2	1.03382e+08	2			1.50481e+08	1			2.15683e+08	2	2.73118e+07	1							1.47343e+08	2					3.41745e+07	2									2.33965e+07	1			2.58042e+07	1	7.85217e+07	1	5.80421e+07	2
expobiome_smorf_02859972	5.99392e+08	3	2.27424e+07	1			7.54388e+07	1					8.88845e+07	2	9.97508e+07	1	9.1138e+07	2			1.55345e+07	1	2.38114e+07	2	7.64552e+07	1					9.78417e+07	1							2.96468e+07	1					7.38725e+07	1	2.60264e+07	1
expobiome_smorf_02860167			6.05826e+07	1					8.29243e+07	2			1.75145e+07	1	2.10829e+07	1	5.11849e+07	1	1.69416e+07	1			1.80978e+07	1	1.7867e+07	1					2.45726e+07	1	5.8034e+07	1	4.38714e+07	1			3.71014e+07	2							1.29665e+07	1
expobiome_smorf_02860735									4.70959e+06	1					4.63443e+07	1							3.13048e+07	1							2.33594e+06	1	4.35863e+07	1									2.58036e+06	1
expobiome_smorf_02861302									8.13948e+07	1															1.32072e+08	1	2.17465e+07	1			1.52107e+07	1			1.53199e+08	1	1.23258e+08	1			1.24109e+08	1
expobiome_smorf_02862336	1.90816e+08	2	2.10636e+08	2					1.77942e+08	2	8.08305e+07	1	7.07529e+07	2	4.53614e+07	2	3.78366e+08	2	5.4927e+07	2	3.23628e+07	2	6.27519e+07	2	1.62181e+07	1	5.13922e+07	2			4.40624e+07	2	1.27341e+08	2	6.78194e+07	2			5.78922e+07	2	3.40813e+07	2	6.27282e+07	2	1.11106e+08	2
expobiome_smorf_02862631			4.32234e+08	4	1.30167e+08	3	4.04524e+07	1	9.06072e+07	3	8.35424e+07	2	1.13547e+08	3			4.40397e+08	5					1.07124e+08	3			2.14138e+07	1			2.04474e+08	4	7.85385e+07	3	8.40639e+07	2							2.14054e+07	1	7.93245e+07	3			9.11617e+07
expobiome_smorf_02862693	8.16695e+07	1	1.01802e+08	1	3.3e+07	1			1.95289e+08	3	5.59029e+07	2	1.49629e+07	1	1.16456e+08	2	6.42294e+08	8	4.45437e+07	1	7.08819e+07	2	2.55117e+08	4	5.81639e+08	6	2.11905e+08	3					1.24339e+08	3	1.04506e+08	2	1.96947e+08	4	6.84581e+07	1	5.50944e+07	2	8.07616e+07	2	1.91123e+08	4	7.60108e+07	1	1.62736e+08
expobiome_smorf_02862695							8.68015e+06	1									6.46417e+08	4																							1.89303e+07	1
expobiome_smorf_02862698	3.97154e+07	1	9.4619e+07	1			6.72347e+07	1	4.43294e+07	1	1.28184e+08	1			3.38559e+07	1	3.43459e+08	1	2.2637e+07	1	6.8773e+07	1	8.4341e+07	1			1.04561e+08	1			9.66833e+07	2	5.58539e+07	1	4.83323e+07	1	9.02795e+07	1	5.08449e+07	1					5.65538e+07	1			1.00086e+08
expobiome_smorf_02863143	9.52887e+07	2	8.88994e+07	2	6.3347e+07	2			2.0408e+07	1	1.1711e+08	2	4.05679e+07	2	7.04666e+06	1	1.758e+08	3	1.21618e+08	2	5.03584e+06	1	9.67405e+07	2	1.80567e+07	1	9.13076e+07	2	5.1801e+06	1	1.11747e+08	2	1.29744e+08	4	8.4362e+07	2			3.50917e+07	1	7.18771e+07	2	1.17797e+07	1	1.06588e+08	2	9.49235e+07	3	2.48401e+07
expobiome_smorf_02863704			7.25503e+07	3	5.08409e+07	3	2.74615e+08	4			8.78076e+06	1	7.2626e+07	3					2.04229e+08	3											1.49118e+07	2					2.13085e+08	2			3.89408e+08	4	3.55974e+07	3	2.81506e+07	2			3.99683e+07
expobiome_smorf_02863823	4.50417e+08	2	3.949e+08	3					3.13783e+08	2	2.53413e+08	2	2.97526e+08	2	2.38892e+08	2	6.28244e+08	5	1.23606e+08	3	1.67338e+08	3	3.41245e+08	3	2.04109e+08	3	1.04055e+08	2			1.2665e+08	3	3.83436e+08	4	2.86505e+08	2			1.87689e+08	4	2.05282e+07	1	1.15522e+08	3	3.15817e+08	3	1.32364e+08	2	6.6415e+07
expobiome_smorf_02863902	1.16586e+07	1	1.6306e+07	1	7.74876e+06	1					1.47302e+08	6	2.49844e+07	2			4.59976e+06	1									1.22704e+07	1			5.1958e+07	2	3.70451e+07	2	1.70196e+07	1	2.81144e+07	1			1.83779e+07	1							4.67045e+07
expobiome_smorf_02864075									4.36975e+07	2	3.49357e+07	1					3.71306e+07	1					3.92983e+07	1	9.56513e+06	1	6.22808e+07	3			6.15568e+06	1			1.51596e+07	1	9.06328e+07	2									1.58946e+07	1
expobiome_smorf_02864131
expobiome_smorf_02864787			3.67514e+07	1	2.89598e+07	1																																			2.09516e+07	1
expobiome_smorf_02864946	7.79544e+07	1	2.19675e+08	1	5.36903e+07	1	6.3754e+07	1	1.43309e+08	1			2.37768e+08	1	8.23593e+07	1	5.05103e+08	1	5.13031e+07	1	1.92318e+08	1	1.05866e+08	1	7.24631e+07	1	3.01831e+08	1					3.88669e+08	5	3.83689e+08	5	5.51084e+07	1	3.56232e+07	1	2.87083e+08	4	1.12528e+08	1	2.8459e+08	1			1.24483e+08
expobiome_smorf_02865156	1.86786e+07	2	1.14694e+08	2	3.7955e+07	2	2.91938e+07	1	3.80425e+07	2	6.98907e+07	2					1.01515e+08	2			3.5649e+07	1	4.96304e+07	1	7.78917e+07	2	4.31919e+07	2			1.267e+07	1	4.80267e+07	2	5.44354e+07	2	4.66828e+07	2	2.28515e+07	1	7.72456e+07	2	2.56771e+07	1	5.66183e+07	2	3.45028e+07	2	6.07772e+07
expobiome_smorf_02865525	8.63672e+07	3							1.34061e+08	4							6.24655e+08	8					2.20059e+08	6	1.80885e+08	3					1.85891e+08	4			4.87974e+07	3	1.51141e+08	4			1.73931e+08	4			4.8925e+07	2
expobiome_smorf_02865738	6.72845e+07	2			8.08544e+06	1									2.96515e+07	2																					1.57846e+08	3									7.171e+07	2	1.54153e+07
expobiome_smorf_02866122																	3.70609e+08	3					1.70335e+07	1																			3.44072e+06	1	2.30315e+08	4
expobiome_smorf_02866302	2.71083e+08	2	2.85114e+08	1	3.31446e+07	1	4.57161e+07	1	2.97551e+08	3	2.86212e+08	3	1.57391e+08	2	2.38351e+08	2	6.15812e+08	3	1.90402e+08	2	1.31971e+08	2	2.61215e+08	3	3.03907e+08	3	6.42632e+07	1			4.36777e+08	3	7.04651e+08	4	1.07911e+08	1	3.57114e+07	1	7.86898e+07	1	1.03623e+08	2	1.42694e+08	2	2.54101e+08	2	5.68082e+07	1	1.0842e+08
expobiome_smorf_02866944			3.1964e+08	3	4.58656e+07	2	3.79563e+07	2	4.13883e+08	3							4.53248e+08	3			2.9384e+08	3	2.06328e+08	2	1.84121e+08	3			1.2668e+07	2			7.15591e+08	4	2.47082e+08	3	6.63543e+07	2			1.65904e+08	3	1.98258e+08	3	3.37231e+08	3	4.6121e+07	2	5.77051e+07
expobiome_smorf_02868111			2.14701e+07	1	3.06945e+07	1	2.78662e+07	1													1.81888e+07	1			3.20515e+07	1					2.20883e+07	1	3.97258e+07	1							2.39352e+07	1							1.29368e+08
expobiome_smorf_02868240	8.56287e+07	2	3.47775e+08	3	9.26126e+07	3			1.29516e+08	3	2.56821e+08	4			5.25668e+07	2	1.05604e+09	5	4.03163e+07	2	2.83597e+07	1	1.28562e+08	2	1.31275e+08	4					8.45745e+07	2			1.35743e+08	3	1.15844e+08	2	6.09718e+07	2	1.87637e+08	4	6.32982e+07	2	2.81264e+08	4	2.48791e+07	2
expobiome_smorf_02868266	7.05224e+07	2	6.61955e+07	2	2.75375e+07	2									7.21118e+07	2																					9.70891e+07	3									7.20554e+07	2	3.10962e+07
expobiome_smorf_02869641	7.9592e+08	4			1.78839e+08	3			1.04605e+09	5	7.21093e+08	5	5.62168e+08	4	2.64071e+08	1	2.17689e+09	5			2.19591e+08	3	1.16473e+09	4	2.34905e+09	6	1.46551e+09	5	4.59345e+08	5	1.42702e+09	5	1.55258e+09	6	4.52138e+08	5	1.41398e+09	4							1.09233e+09	5	2.25698e+08	3	7.57065e+08
expobiome_smorf_02869890							4.77256e+06	1					6.16396e+07	3	5.9805e+06	1																					4.83757e+07	2							3.10999e+07	2	1.53317e+07	2
expobiome_smorf_02870244			1.31025e+07	1							1.23864e+07	1					8.04597e+07	1			5.69571e+06	1											1.34429e+07	1							5.75882e+07	1							1.21661e+07
expobiome_smorf_02870687					6.43279e+07	1	6.43587e+07	1	4.47837e+07	1			4.21974e+07	1	2.85095e+07	1			4.5272e+07	1	2.30204e+07	1	3.1122e+07	1	1.87163e+07	1	6.4523e+07	1			3.66537e+07	1	3.68865e+07	1	6.96298e+07	1			5.29831e+07	1			2.4782e+07	1			1.22543e+08	1	4.66665e+07
expobiome_smorf_02870849																																	2.97879e+07	1	3.73007e+07	1									3.49941e+07	1
expobiome_smorf_02871169	1.21979e+08	2	9.73824e+07	2	8.38602e+07	3			3.79145e+07	2	2.0636e+08	2			4.49353e+06	1	2.70199e+08	2					4.73788e+07	2	1.97337e+07	2	1.03345e+08	2			1.81807e+08	3	1.22096e+08	3	3.89595e+07	2			8.94881e+07	2							2.92968e+07	2	1.02559e+08
expobiome_smorf_02871202					5.14552e+07	1																											1.59861e+08	1			9.04877e+07	1
expobiome_smorf_02871759	1.59398e+08	1	2.46509e+08	1	3.79353e+07	1			2.46941e+08	1	2.32198e+08	1			1.24489e+08	1	8.93681e+07	1	1.03359e+08	1	1.37215e+08	1			1.3793e+08	1					1.03279e+08	1	2.16949e+08	1	1.57664e+08	1			1.19116e+08	1	5.43237e+07	1			2.13919e+08	1	8.51877e+07	1	3.96695e+07
expobiome_smorf_02871767			3.34318e+07	1	3.8427e+07	1			2.24204e+07	1	1.3976e+07	1							1.42268e+07	1									4.86473e+07	1											4.09134e+07	1			6.40428e+07	1	2.73281e+07	1
expobiome_smorf_02871915											9.11014e+07	2			9.28797e+06	1	8.35923e+08	9									2.08076e+07	2			7.58838e+07	2	1.35626e+08	3					3.4467e+07	2
expobiome_smorf_02873064	2.14481e+08	4	2.33016e+08	4					2.08745e+08	3	1.45415e+08	3			3.46574e+07	2	4.67821e+08	4	9.75223e+07	3	1.69017e+07	1			2.27817e+07	1					9.27716e+07	3	8.63762e+07	4	2.09923e+08	5			1.00961e+08	4	2.76655e+07	2	2.13277e+07	1	5.58903e+07	2	2.30133e+07	1
expobiome_smorf_02873278					2.32888e+07	1			9.2239e+07	2
expobiome_smorf_02874273	1.13827e+08	2							5.36301e+07	2	1.82414e+08	2	3.08908e+08	2	1.8186e+07	1	3.72264e+07	1					3.20901e+07	1	9.1036e+06	1	3.46017e+07	1			1.39611e+08	2	1.95764e+08	2	2.11746e+07	1					1.83011e+07	1	2.26648e+08	2	2.47234e+07	1
expobiome_smorf_02874945	4.35543e+06	1					3.70596e+06	1									1.82287e+07	2									2.71799e+07	3					7.38224e+06	1			7.49922e+06	1					9.17335e+06	1			2.35927e+07	2
expobiome_smorf_02875047	9.43283e+08	5	7.83165e+08	5	4.86826e+07	1	1.35065e+07	1	5.96627e+08	5	3.20975e+08	3	1.38137e+09	5	2.33622e+07	1	6.30581e+08	5			7.15844e+07	1	4.36886e+08	4	3.73802e+07	1	4.99293e+08	5	8.08495e+06	1	6.63854e+07	1	1.159e+09	5	2.99591e+07	1	7.13073e+08	4	3.35621e+08	3	7.93217e+07	1	4.47662e+08	4	4.04585e+08	4			7.80389e+07
expobiome_smorf_02875308	4.36668e+08	4					1.16806e+07	1	3.7819e+08	3	6.23038e+08	5					3.69301e+08	5					4.3255e+08	4	2.61999e+08	3	4.39903e+08	4			6.55417e+08	4	3.12174e+08	6	2.52405e+08	3	3.61087e+08	4	5.37765e+08	6							4.59153e+08	3	4.82713e+08
expobiome_smorf_02875707					1.59368e+07	1																															4.3137e+07	2
expobiome_smorf_02875865	1.9725e+08	2	6.7732e+07	1	6.45342e+07	1			1.49873e+08	2	1.50641e+08	1	9.17367e+07	2	5.3913e+07	1	1.35355e+08	2	1.18483e+08	2	5.93316e+07	1	1.51925e+08	2	8.58578e+07	1	1.17375e+08	2	5.10088e+07	2	2.68666e+08	1	1.44227e+08	2	7.55549e+07	1	1.06518e+08	1	1.41707e+08	2	8.4507e+07	1			5.59245e+07	1	1.63089e+08	2	9.52022e+07
expobiome_smorf_02876377	1.47085e+08	2			1.96978e+07	1	7.90046e+07	1	8.61837e+07	2	5.31224e+07	2	6.7733e+07	2	5.23261e+07	1	2.4856e+06	1	6.81957e+07	2	9.66828e+07	1	1.16899e+07	1	1.80612e+07	1	3.4494e+07	1	1.75272e+07	1					1.03483e+08	2	2.22544e+08	3	3.99705e+07	3	7.01963e+07	1	2.93243e+07	1			1.65009e+08	2	2.36146e+08
expobiome_smorf_02876378	8.34734e+06	1	9.4328e+06	1			6.779e+07	1			1.88378e+07	1					1.2827e+08	2			5.48312e+06	1					6.26923e+06	1									4.85413e+07	1			6.80153e+07	1			3.94294e+06	1			1.34826e+08
expobiome_smorf_02876379							2.62909e+07	1	2.46417e+07	1	3.46217e+07	1			1.80246e+07	1	6.55131e+07	1	8.0767e+07	1							8.99123e+07	2							4.69986e+07	1	1.19844e+08	1	4.22903e+07	1	6.28511e+07	2	4.62936e+07	2	2.00102e+07	1			2.09751e+08
expobiome_smorf_02876542			3.78373e+07	2									1.30262e+07	1									2.19917e+07	1					2.14807e+07	1					5.02312e+07	2							1.48826e+07	1	1.29912e+08	2			1.92962e+07
expobiome_smorf_02877004	1.61636e+08	3	2.67662e+08	3	3.49934e+07	2	1.06466e+08	4	4.03835e+07	2	2.18329e+08	3			6.95138e+07	2	7.40222e+08	7	5.03205e+07	2	1.94622e+08	2	3.66413e+08	4	2.17434e+08	3	2.53083e+08	4			1.81549e+08	3	2.12819e+08	5	1.41911e+08	4	7.24367e+07	2	1.94462e+08	5	1.74154e+08	3	2.48889e+08	3	4.62033e+08	6	4.84845e+07	2	1.87914e+08
expobiome_smorf_02877427	3.70883e+08	2							4.29911e+08	3	9.26174e+08	3	1.29882e+09	3	1.5986e+08	2	2.03996e+08	3			5.87905e+07	2	1.56791e+08	4	1.19106e+08	2	3.32123e+08	3			1.31046e+09	3	5.06638e+08	3	2.12186e+08	3					2.05856e+08	3	8.67152e+08	3	2.57144e+08	3
expobiome_smorf_02877908											1.36517e+08	3															1.82136e+08	3																			6.14229e+07	1
expobiome_smorf_02878051	5.21615e+07	2	1.29957e+08	2							1.35813e+08	3																			9.38964e+06	1			8.52285e+07	2			7.74499e+07	3			1.76171e+08	4	1.30695e+07	1
expobiome_smorf_02878052											7.91704e+06	1
expobiome_smorf_02878055			1.18832e+07	1							1.30355e+07	1																			8.39751e+06	1							3.4758e+06	1									7.13032e+06
expobiome_smorf_02878435																																					2.215e+07	2									1.3907e+07	1
expobiome_smorf_02879396	1.43896e+09	3	9.96049e+08	2	2.4565e+08	2	1.43775e+08	2	1.49421e+09	3	8.83248e+08	3	7.92955e+08	2	9.09983e+08	3	1.82306e+09	3	3.14925e+08	2	3.46012e+08	2	7.22468e+08	2	5.13963e+08	2	3.69714e+08	3	2.20607e+08	2	3.51625e+08	2	4.70701e+08	3	8.40515e+08	3	1.40338e+08	2	4.68982e+08	2	2.39571e+08	2	5.13052e+08	2	6.98272e+08	2	4.37474e+08	2	1.55203e+08
expobiome_smorf_02880418					6.12413e+07	2	3.04134e+07	1			1.50713e+08	2					1.48943e+07	1					1.73056e+08	2	1.88575e+07	1	1.0038e+08	1							1.2547e+08	2	1.87045e+08	1	2.22972e+08	2	1.41534e+08	2	7.6784e+07	1	7.92741e+07	1			7.38999e+07
expobiome_smorf_02880999			3.03171e+08	3	1.20952e+08	3	8.77075e+07	3	2.7451e+07	2	4.54842e+08	4	3.16633e+08	3	4.19129e+08	4	5.55754e+08	4	3.36323e+07	2	5.70616e+07	2	1.1406e+08	3	1.63871e+08	4	3.55751e+08	4			1.57119e+08	4	4.22129e+07	3	7.59105e+08	4	1.04374e+08	2	5.9718e+08	4	3.34626e+08	4	4.48278e+08	4					4.65979e+07
expobiome_smorf_02881311	6.08712e+07	1	8.02913e+07	1	4.91832e+07	1			3.74291e+07	1			4.5606e+07	1	2.01209e+07	1	1.44023e+08	2							2.35766e+07	1	2.49144e+07	1			6.93869e+07	1	2.35289e+07	1	4.92341e+07	1							4.13846e+07	1	1.86564e+07	1
expobiome_smorf_02882290									1.14341e+08	1							7.38437e+07	1													6.29457e+07	1
expobiome_smorf_02882533	2.66302e+08	3	3.46581e+08	2			4.07427e+07	1	4.60017e+08	2			5.49659e+08	3	1.89656e+08	2	5.16003e+08	3	1.54855e+08	2	1.40899e+08	1	2.72836e+08	2	2.14418e+08	2	8.06296e+07	1			3.78824e+07	1	5.97944e+08	4	1.46268e+08	1	5.94711e+07	1	3.08722e+07	1	2.48873e+08	2	2.05088e+08	2			5.14756e+07	2
expobiome_smorf_02882535	4.86378e+07	2	7.35174e+07	1	2.94127e+07	1	3.96528e+07	3	6.14568e+06	1							3.75246e+08	1															6.19487e+07	2	2.36328e+07	1					2.06429e+08	3							4.49205e+07
expobiome_smorf_02882555	7.60489e+07	2	2.76693e+07	2													3.62942e+07	1			1.30732e+07	1					7.44702e+07	2							2.94129e+07	2	6.79901e+07	2	7.02509e+06	1	2.23656e+07	1			1.13236e+07	1	1.39562e+07	1	1.78382e+08
expobiome_smorf_02883350	4.08069e+07	1															2.43658e+08	2					7.2227e+07	2	1.64057e+08	3	6.54617e+07	1			5.934e+07	1	7.94114e+07	2	8.53274e+06	1	2.14196e+07	2			7.73541e+07	2			4.82416e+07	1
expobiome_smorf_02883476	1.34772e+08	2	1.10569e+08	2	1.34126e+07	1	1.72369e+08	3	3.06961e+07	1	4.55094e+07	1	2.53501e+07	1	5.05262e+06	1	1.87705e+08	3	4.02609e+07	1	3.32115e+07	1			2.27962e+07	1	3.55946e+07	2							1.03103e+08	2	2.39003e+08	3	2.22151e+07	1	1.84782e+08	2	2.22625e+07	1	3.81525e+07	1	5.14062e+07	1	5.05095e+08
expobiome_smorf_02883568	3.43772e+08	2	3.80397e+08	2	1.04595e+08	2	4.47517e+07	2	4.06454e+08	2	1.67104e+08	2	1.13854e+08	2	5.38422e+08	2	1.15005e+08	2			9.78147e+07	2	1.03954e+08	2	3.61876e+08	2			7.39335e+07	2	2.7988e+08	2	2.58835e+08	2	4.00586e+08	2			9.488e+07	1	4.09405e+08	2	1.35785e+08	2	1.64542e+08	2	2.8765e+08	2	1.04611e+08
expobiome_smorf_02883668	7.40997e+08	3													7.10848e+07	1																											5.99297e+07	2
expobiome_smorf_02884055
expobiome_smorf_02884143	4.61304e+08	2	4.44342e+08	2	9.32635e+07	2			2.82743e+08	2	6.51074e+08	2			2.0049e+08	2	6.60657e+08	2	1.03515e+08	2	1.83187e+07	1	2.33129e+08	2	8.67454e+07	2	1.64362e+08	2	6.67047e+07	2	2.9219e+08	2	4.32891e+08	2	1.75135e+08	2	1.38928e+08	2			2.44488e+08	2	1.33653e+08	2	8.33315e+08	2	1.67706e+08	2
expobiome_smorf_02884858	3.54679e+07	1							8.65187e+07	1					2.41812e+07	1											3.43565e+07	1					5.30223e+07	1	1.91485e+07	1			5.75023e+07	1			2.96679e+07	1			2.15054e+07	1
expobiome_smorf_02885382	2.47396e+08	2	2.91531e+08	4			7.0124e+08	6			5.39924e+08	5			1.90613e+08	3			9.68514e+07	2	5.90276e+07	2			1.66251e+08	2	5.04797e+08	4					1.94663e+08	3	4.83289e+08	5			6.47164e+08	5			3.7529e+08	3	1.57674e+08	2	3.55157e+07	1	7.49497e+08
expobiome_smorf_03187732													4.3629e+06	1
expobiome_smorf_03195300
expobiome_smorf_04000317
expobiome_smorf_04176761																							8.81321e+07	1	8.24451e+07	2
expobiome_smorf_04414402
expobiome_smorf_04419484
expobiome_smorf_04434559																																			1.7047e+07	1
expobiome_smorf_04449453
expobiome_smorf_04727914
expobiome_smorf_05054526
expobiome_smorf_05066533
expobiome_smorf_05449131
expobiome_smorf_05826177
expobiome_smorf_06027821
expobiome_smorf_06029851
expobiome_smorf_06051124															2.91154e+08	5																																	1.39906e+08
expobiome_smorf_06051487																																			1.17416e+07	1									1.82921e+08	3	3.82889e+07	2
expobiome_smorf_06054891																					5.66087e+07	1																							1.16781e+08	2	6.2029e+07	2
expobiome_smorf_06073267															7.19484e+07	2																			2.26186e+08	3	4.44029e+07	2					7.86314e+07	2					1.9236e+08
expobiome_smorf_06343103							1.69266e+08	3
expobiome_smorf_06575072																																	7.35918e+06	1
expobiome_smorf_06851004															1.58557e+07	1											2.13877e+07	1																			6.94548e+06	1
expobiome_smorf_06853567					4.46041e+08	6	2.79925e+08	4			6.28076e+08	4			9.64186e+08	5	9.55894e+08	5			5.78352e+08	4	2.41512e+08	4	1.06871e+09	5	9.52405e+08	4			6.07373e+08	4	5.93804e+08	5	2.21445e+08	4	5.29776e+07	3	3.8251e+08	5	8.43057e+08	4	5.82514e+07	3	1.27166e+07	1	2.2937e+09	5	2.00948e+08
expobiome_smorf_06857957					1.04476e+08	2	1.11056e+08	3			7.75393e+07	3			2.65383e+08	3	9.9724e+07	2			1.12542e+08	2	1.40726e+07	1	4.36505e+08	3	2.14678e+08	3			1.8392e+07	1	2.50401e+07	2	3.90879e+07	2			2.51132e+08	3			1.16106e+07	1	1.82241e+07	1	1.02893e+09	4	4.89769e+07
expobiome_smorf_06868439									7.13921e+07	2			5.01595e+07	1													1.40693e+07	1
expobiome_smorf_06875626									2.19076e+08	6	1.61948e+08	1											2.43026e+08	5			1.60828e+07	1			2.36101e+08	4			6.72446e+07	1									3.07108e+08	4
expobiome_smorf_06878467							1.72686e+08	2			5.39813e+08	3			5.27311e+08	3					3.97751e+08	2			1.12461e+09	3									1.97434e+08	3	3.93369e+07	1	3.485e+08	2	5.21087e+08	2	4.47035e+07	1	1.38407e+07	1	1.85411e+09	3	1.79002e+08
expobiome_smorf_06878473					1.18179e+08	3	1.24953e+08	3			1.40211e+08	1			3.27099e+08	3	3.59625e+08	2			2.7469e+08	3	8.30208e+07	2	2.10505e+08	2	2.07057e+08	1			1.03969e+08	2	2.42003e+08	3	5.71007e+07	2			1.21838e+08	2	1.74757e+08	1	2.99377e+07	2	1.12673e+07	1	1.36987e+09	4	5.91113e+07
expobiome_smorf_06878476					2.87915e+08	2	1.09163e+08	1							4.70187e+08	2					2.75494e+08	2	5.23396e+07	1	3.33257e+08	2	3.73919e+08	2			1.82638e+08	1	2.20922e+08	2	7.71005e+07	1			1.29165e+08	1	2.30101e+08	1					8.82395e+08	5	4.5299e+07
expobiome_smorf_06878478					1.74136e+08	2	1.11977e+08	2			4.04967e+08	3			1.15475e+09	3					8.29226e+08	6	2.2851e+08	3	1.22884e+08	1	6.40194e+08	3			5.19601e+08	5	5.64391e+08	5	1.96254e+08	3			4.18123e+07	1	6.45166e+08	4	7.60262e+07	2	1.37365e+07	1	3.03407e+09	6
expobiome_smorf_06878479							8.99423e+07	1									1.36022e+08	2			5.13863e+08	3			5.56523e+08	4							4.93909e+08	3	1.45788e+08	2	3.04517e+07	1	2.04617e+08	1	5.45363e+08	3	5.63132e+07	1			5.23577e+08	1	8.60037e+07
expobiome_smorf_06878483							3.4002e+08	3			2.11522e+08	3			4.07322e+07	1	3.10041e+08	1																	1.23566e+07	1			8.91375e+07	2							3.25383e+08	3	5.08884e+07
expobiome_smorf_06883941					2.47914e+08	2	1.81585e+08	2			1.3869e+08	2			1.83651e+08	2			2.07673e+08	2	5.94324e+07	1	2.22157e+08	2	1.20608e+08	2	4.46166e+08	2	9.428e+07	2			6.14857e+07	2			1.35269e+08	2	2.03007e+08	2	2.04859e+08	2	1.41705e+08	2	1.94458e+08	2	2.94431e+07	1
expobiome_smorf_07040035					3.55623e+07	1							2.36482e+07	1																			5.19676e+07	1
expobiome_smorf_07043839					3.32341e+07	2									8.06273e+07	1																	3.75384e+07	2					1.90213e+08	3					4.60242e+07	2			1.36993e+09
expobiome_smorf_07045924																					2.88459e+07	1			7.27817e+07	1																							1.02351e+07
expobiome_smorf_07046112
expobiome_smorf_07049254
expobiome_smorf_07050343																																	1.20906e+08	1
expobiome_smorf_07055830							7.84471e+06	1															2.98411e+07	1											4.88317e+06	1
expobiome_smorf_07056465																																			1.71547e+07	1	1.86748e+08	1			5.08739e+07	1
expobiome_smorf_07056613															8.25848e+06	1																			3.57892e+07	2			1.07489e+07	1					1.89611e+07	2			6.58978e+06
expobiome_smorf_07060587
expobiome_smorf_07061762					2.46931e+07	2	4.27206e+07	2	7.25568e+07	3	1.32622e+08	4															1.11869e+08	3			5.42574e+07	2	2.25471e+07	2	5.60815e+07	3					5.14607e+07	3	6.3197e+07	2					1.26563e+08
expobiome_smorf_07061868
expobiome_smorf_07071992					5.31051e+07	2	2.24041e+08	4																			8.85523e+07	3							2.97291e+06	1			5.36936e+07	3			1.1511e+06	1
expobiome_smorf_07079348									1.72519e+07	1	2.51532e+07	1											8.04232e+07	2											3.92699e+07	1			1.04428e+07	1	1.19344e+08	2
expobiome_smorf_07481448
expobiome_smorf_08042002
expobiome_smorf_08392264																					9.40428e+07	3
expobiome_smorf_08404003																					5.03354e+07	2					4.75189e+07	1
expobiome_smorf_08451301
expobiome_smorf_08497165																															2.02017e+08	4			2.59214e+08	5
expobiome_smorf_08768829					9.78218e+07	3																	1.67758e+07	2							9.656e+07	3	7.03676e+07	3							7.25449e+08	6
expobiome_smorf_08771582											1.27317e+08	1																			2.00878e+08	2					1.7462e+07	1					8.30868e+07	2					5.00899e+07
expobiome_smorf_08771583					5.8268e+07	1					5.22204e+08	5																			5.31671e+08	4			1.35343e+08	3			2.45967e+08	2									9.69884e+07
expobiome_smorf_08782936							2.0503e+07	1																															2.85369e+07	1					1.11727e+08	2
expobiome_smorf_08783647																															2.87335e+07	2
expobiome_smorf_08784611																																							3.73112e+07	1					7.33552e+07	2
expobiome_smorf_08784613					8.31716e+06	1	5.73707e+07	1																															1.04211e+07	1	2.64738e+07	1			1.36359e+08	3
expobiome_smorf_08784760
expobiome_smorf_08789132																																							2.7419e+07	1
expobiome_smorf_08789296							2.40171e+07	1																															4.94449e+07	1	1.68221e+07	1			2.60638e+07	1
expobiome_smorf_08793475					3.87971e+08	5	4.62639e+08	6									1.04281e+07	1									1.87839e+08	4	1.77557e+08	5							1.01911e+09	6			3.94769e+08	5			9.07118e+07	4	4.36424e+08	6
expobiome_smorf_08798744					5.73434e+07	1					7.94027e+07	1																	4.98026e+07	1	1.54691e+08	1			1.09254e+08	2			2.66256e+08	3									9.53387e+07
expobiome_smorf_08801594																																							2.74355e+07	1
expobiome_smorf_08807277					1.51767e+07	1					1.74989e+08	3																	6.11548e+06	1	5.90507e+08	5			1.81438e+08	3			2.92769e+08	4
expobiome_smorf_08813525
expobiome_smorf_08818688					1.37509e+07	1					1.36559e+08	2																			3.03924e+08	3			1.20557e+08	2			2.08056e+08	4									5.5618e+07
expobiome_smorf_08819818											1.24814e+07	1																			1.62393e+07	1			9.03774e+06	1			9.33516e+06	1
expobiome_smorf_08822084																							5.10757e+07	1
expobiome_smorf_08823581											1.11624e+08	2																			1.93434e+08	5			1.01185e+08	2			8.44004e+07	3									1.26987e+07
expobiome_smorf_09279428
expobiome_smorf_09314703
expobiome_smorf_09355237					8.17161e+07	2	5.47357e+07	2			1.64325e+08	3			9.79645e+07	2					7.00827e+07	2	1.51665e+08	3															3.90505e+07	2	5.16313e+08	3			1.67843e+08	2			8.38524e+07
expobiome_smorf_09358441					2.58472e+07	1											7.65896e+07	1			8.28266e+06	1									6.37301e+07	2
expobiome_smorf_09361413
expobiome_smorf_09363389					1.36673e+08	2			1.5883e+08	2															2.19424e+08	2															8.75098e+07	2
expobiome_smorf_09367445																							8.30879e+07	1									1.19388e+08	2
expobiome_smorf_09371534																											1.06393e+07	1
expobiome_smorf_09379992					8.27272e+07	1			5.66892e+07	2															6.05881e+07	2
expobiome_smorf_09385918
expobiome_smorf_09390096																					2.8329e+08	5																					1.74804e+08	4
expobiome_smorf_09396595							8.11377e+07	2																											2.22272e+08	4
expobiome_smorf_09410568																																									3.39354e+08	5							2.27178e+07
expobiome_smorf_09428070																					1.53553e+07	1			1.45244e+07	1																							2.90907e+07
expobiome_smorf_09428621																											7.12451e+07	1							1.35215e+08	1			5.86474e+07	1	2.5596e+08	1
expobiome_smorf_09719834
expobiome_smorf_10128659													1.33704e+07	1																					1.86383e+07	1							8.29178e+06	1	7.4558e+06	1
expobiome_smorf_10144574
expobiome_smorf_10179607													8.77279e+07	2																					1.06125e+08	2					2.00833e+08	3					2.09881e+07	1
expobiome_smorf_10478623															7.0311e+07	2					1.49545e+07	1													1.69226e+08	4
expobiome_smorf_10486517															7.53456e+06	1
expobiome_smorf_10487424															2.37059e+07	1
expobiome_smorf_10495595																																													1.94711e+07	1
expobiome_smorf_10500181															2.83705e+07	1
expobiome_smorf_10501277
expobiome_smorf_10513411															7.76181e+06	1
expobiome_smorf_10521597															3.96025e+07	1																			1.87212e+08	1													1.67663e+08
expobiome_smorf_10524087
expobiome_smorf_10533150
expobiome_smorf_10534055
expobiome_smorf_10537630
expobiome_smorf_10541591															5.19667e+07	1
expobiome_smorf_10543674															7.56106e+06	1																			2.04998e+07	1													1.85721e+08
expobiome_smorf_10547757															1.33655e+08	2																			2.56805e+08	4													1.22778e+08
expobiome_smorf_10729087
expobiome_smorf_10749057
expobiome_smorf_10752099
expobiome_smorf_10754027
expobiome_smorf_10756165
expobiome_smorf_10756770
expobiome_smorf_10757058
expobiome_smorf_10757225
expobiome_smorf_10761603
expobiome_smorf_10763531
expobiome_smorf_10764753
expobiome_smorf_10765029
expobiome_smorf_10765688																																							2.05071e+08	4
expobiome_smorf_10769154
expobiome_smorf_10770272
expobiome_smorf_10772643
expobiome_smorf_10773414
expobiome_smorf_10776276
expobiome_smorf_10776356
expobiome_smorf_10781457
expobiome_smorf_10782846
expobiome_smorf_10784475
expobiome_smorf_10787980																					1.92974e+07	1
expobiome_smorf_10788656
expobiome_smorf_10789667
expobiome_smorf_10791742
expobiome_smorf_10792281
expobiome_smorf_10792881
expobiome_smorf_10794544
expobiome_smorf_10794836
expobiome_smorf_10795172
expobiome_smorf_10795358
expobiome_smorf_10796108
expobiome_smorf_10796453
expobiome_smorf_10799147
expobiome_smorf_10802323
expobiome_smorf_10806201
expobiome_smorf_10806214
expobiome_smorf_10807411
expobiome_smorf_10814301
expobiome_smorf_10814728
expobiome_smorf_10821235
expobiome_smorf_10822102
expobiome_smorf_10830627
expobiome_smorf_10832912
expobiome_smorf_10836892
expobiome_smorf_10838730
expobiome_smorf_10840067
expobiome_smorf_10841227
expobiome_smorf_11101041					7.64552e+06	1
expobiome_smorf_11122835					4.49907e+07	1	1.96343e+07	1
expobiome_smorf_11130828					1.70459e+08	2	2.75418e+07	2
expobiome_smorf_11133929					1.94576e+07	1																			3.48136e+07	1
expobiome_smorf_11149757
expobiome_smorf_11157921
expobiome_smorf_11161358					1.51162e+07	1																																							2.91875e+07	2
expobiome_smorf_11161630																									5.70476e+07	1															4.43134e+07	1
expobiome_smorf_11170627
expobiome_smorf_11176995
expobiome_smorf_11177532											1.54676e+07	1																							2.83802e+07	2			3.79408e+07	2
expobiome_smorf_11177540					1.4401e+08	5	4.44498e+07	3
expobiome_smorf_11179722																																									4.68566e+07	1
expobiome_smorf_11184403					1.85052e+07	2
expobiome_smorf_11188684
expobiome_smorf_11202932					2.43096e+07	1																									2.72615e+07	1
expobiome_smorf_11279896
expobiome_smorf_11279898
expobiome_smorf_11283328
expobiome_smorf_11283329
expobiome_smorf_11283330
expobiome_smorf_11321110
expobiome_smorf_11684610
expobiome_smorf_11687121
expobiome_smorf_11688642
expobiome_smorf_11712742
expobiome_smorf_11733899
expobiome_smorf_11734643
expobiome_smorf_11734847
expobiome_smorf_11734848
expobiome_smorf_11737756
expobiome_smorf_11749762
expobiome_smorf_11761753
expobiome_smorf_11775683
expobiome_smorf_11892982																													2.43665e+07	1
expobiome_smorf_12032031
expobiome_smorf_12210317	7.94282e+06	1			3.02827e+07	1			1.40923e+07	1															3.326e+07	1
expobiome_smorf_12210924	1.59734e+08	2							1.6314e+08	3	8.92228e+08	4	6.07097e+08	5	4.2579e+07	1	1.81013e+08	3			2.27093e+07	1	8.93792e+07	2	6.96134e+07	2	1.80578e+08	3			8.24463e+08	5	2.74731e+08	4	1.29474e+08	4					2.15864e+08	4	6.47889e+08	5	1.71169e+08	4
expobiome_smorf_12211157	2.7683e+09	8	4.48354e+08	1	1.53664e+08	1	7.46507e+08	6			1.42837e+09	8	1.8099e+08	1					2.96852e+08	5	9.90778e+07	2			2.69434e+08	3			7.60711e+08	6	7.89506e+08	5	1.79227e+09	8			4.53505e+08	5	1.0402e+09	6			5.86519e+08	3	1.64096e+09	6	1.05488e+09	2
expobiome_smorf_12211821	2.71963e+08	3	1.22817e+08	1			6.41931e+07	2			5.3994e+07	1	1.07144e+08	2			8.56387e+07	1			9.70241e+07	2	3.2522e+07	1	2.88071e+08	3	1.56911e+08	2					3.27354e+08	3	9.01527e+07	1							1.26071e+08	2	4.99144e+07	1
expobiome_smorf_12213249	5.62543e+08	6	1.95185e+08	3			3.46362e+07	1	3.76207e+07	2	6.85338e+08	9	1.1286e+08	3			3.98171e+08	6	1.15924e+08	2	2.11234e+07	1					8.53891e+07	1			2.05693e+08	3	9.29994e+07	4	2.89232e+08	6					3.69543e+08	4	6.15336e+07	1
expobiome_smorf_12214001	1.84557e+07	1															3.71885e+07	1					4.68038e+07	3	2.66018e+07	2															4.75462e+06	1							3.40973e+07
expobiome_smorf_12214423															1.43816e+07	1					9.49729e+06	1	3.28464e+07	2	3.57191e+07	2					1.89608e+07	1									2.62951e+07	2			2.96861e+07	2
expobiome_smorf_12214892	8.67999e+07	3	1.19873e+08	3					2.80555e+08	5	2.63605e+07	1	3.41694e+07	1	2.5914e+07	1	1.87023e+08	5			1.17032e+08	4	2.80655e+07	1			2.36607e+08	4			1.30682e+08	2	2.50898e+08	5	5.3066e+07	2	8.74067e+07	2	1.56666e+08	4	1.2119e+08	3	1.27437e+08	3	1.89661e+07	1	1.81003e+07	1	1.16356e+08
expobiome_smorf_12217800					4.27912e+07	2			1.77493e+07	1			9.01909e+06	1	3.09451e+07	1					6.45607e+07	2	1.32316e+08	3	1.2615e+08	3					8.90006e+07	2									1.04451e+08	2			1.72369e+08	3			1.43386e+07
expobiome_smorf_12217899					1.95865e+07	1					1.25071e+07	1	2.15936e+06	1							1.6918e+07	1	6.86989e+06	1									1.05006e+07	1	1.30461e+07	1			9.64217e+06	1	3.99877e+07	1			4.7057e+07	1	6.07883e+06	1	1.63798e+07
expobiome_smorf_12218766	2.76399e+08	2											4.00525e+07	1			1.45598e+08	2			6.90959e+07	1											9.72113e+07	1	4.99094e+07	1	1.59894e+08	1	1.06935e+08	1			3.70734e+07	1			4.87769e+07	1
expobiome_smorf_12218898	7.33428e+07	3			4.72382e+07	2	7.65762e+07	3					6.36467e+07	2									1.4146e+08	3			2.23319e+07	2			1.69575e+07	1			2.0999e+08	3					1.52668e+08	2	6.66864e+07	3			7.31621e+07	2
expobiome_smorf_12219961																																									2.49995e+07	1
expobiome_smorf_12220455
expobiome_smorf_12220508							4.04572e+07	1																							3.24157e+07	1
expobiome_smorf_12221305																	7.0165e+07	2							3.9579e+07	1							4.80174e+07	2	1.81459e+07	1			8.98874e+06	1					1.14805e+08	2
expobiome_smorf_12222405	5.02855e+07	1	3.10965e+08	3			9.64705e+07	2			2.10953e+08	2	3.48583e+07	2							1.8782e+07	1	1.78275e+07	1	3.80171e+07	1	2.20369e+08	2					1.11842e+08	3
expobiome_smorf_12223199	6.1085e+08	2			1.10186e+07	1	1.67486e+07	1	9.5797e+07	1			6.03584e+07	1			8.28777e+07	1									5.84195e+07	1			7.0609e+07	2	2.04205e+08	2	8.90787e+07	1	1.5313e+08	1	2.83018e+08	2			6.58951e+07	1	1.97675e+07	1			5.18836e+07
expobiome_smorf_12223537	7.01784e+07	2	1.32404e+08	2			1.14979e+08	3			1.18807e+08	3	3.25525e+07	1	2.14512e+07	1					3.03858e+07	1	2.50862e+07	1	8.7931e+07	1	1.15111e+08	2					2.83055e+08	7
expobiome_smorf_12223538	3.36068e+07	1	1.13612e+08	2			2.17872e+07	1			3.41823e+07	1	1.23882e+07	1			9.82872e+07	1			1.66476e+07	1	1.07581e+07	1	6.82404e+07	1	9.13569e+07	1					9.46942e+07	1	7.84944e+06	1							1.83227e+07	1
expobiome_smorf_12223739
expobiome_smorf_12223835	1.26649e+08	3							2.1078e+08	3	2.19409e+07	1			6.89663e+06	1	2.19705e+08	1					2.95887e+08	5	1.70257e+08	3	3.57074e+08	4					2.07528e+08	5	2.30432e+07	1	5.23693e+07	1	1.35214e+07	1	1.9694e+08	4
expobiome_smorf_12223888	5.72669e+07	1			3.4974e+07	1	9.52533e+07	1	4.47441e+07	1			3.32885e+07	1									5.4068e+07	1			2.24727e+07	1			3.60121e+07	1			1.75374e+08	1					2.03226e+08	1	3.50974e+07	1			8.70395e+07	1	6.55644e+07
expobiome_smorf_12224573	3.31e+07	1							4.50497e+07	1			6.66603e+07	2																			2.13415e+07	1	2.3555e+08	3					2.33536e+07	1	6.63282e+07	1	7.14986e+06	1
expobiome_smorf_12224869									6.57657e+06	1											1.21516e+07	1																			3.19206e+07	1
expobiome_smorf_12224897																																			6.51931e+07	1
expobiome_smorf_12226936	6.35248e+06	1							1.33371e+07	1	5.26229e+07	1											9.33839e+07	1	4.92826e+07	1	6.84903e+06	1			8.56097e+07	1									1.18763e+08	1			1.13863e+08	1			2.92064e+07
expobiome_smorf_12227399									1.76406e+07	1			6.48308e+07	2																					1.32842e+08	2							1.00171e+08	1
expobiome_smorf_12227400	1.11679e+08	2	6.32088e+07	1			2.32709e+07	1	6.34822e+07	2			2.18439e+08	2	4.58087e+07	2					7.48083e+07	2			3.41197e+07	1					5.25233e+07	2	1.16869e+08	2	5.02518e+08	2					1.81547e+08	2	2.57729e+08	2	2.42935e+08	2			6.5715e+07
expobiome_smorf_12229185	1.84435e+08	1	8.79778e+07	1			1.74096e+08	1	1.84661e+08	1	4.36692e+07	1	2.22033e+07	1			8.31513e+07	1			1.34371e+08	1	1.59397e+07	1			1.12307e+08	1			6.18931e+07	1	1.1718e+08	1			1.38249e+08	1	1.62848e+08	1			5.62691e+07	1			5.90469e+07	1
expobiome_smorf_12229317	2.8144e+08	1	1.79466e+08	1					2.61142e+08	1	1.21096e+08	1	1.29521e+08	1			1.07391e+07	1							1.67133e+08	2			5.85481e+07	1	8.45176e+07	1	2.34739e+08	1							5.20421e+07	1			1.73655e+08	1
expobiome_smorf_12229810
expobiome_smorf_12229811	2.17891e+08	3	2.97266e+08	3	1.65314e+07	1	1.08976e+08	1	2.83359e+08	2	9.28123e+07	2	5.70807e+07	1	1.10467e+08	1	3.13148e+08	2			2.931e+08	2	1.07249e+08	1	4.95266e+07	1	4.64481e+08	4			2.69314e+08	3	4.10095e+08	4	1.54088e+08	2	2.10973e+08	3	4.29315e+08	3	2.1218e+08	3	2.56923e+08	2	3.70326e+07	1	3.07693e+08	4	2.02503e+08
expobiome_smorf_12229869	1.08824e+07	1	8.86345e+07	3	2.77207e+07	1	5.92838e+07	3	4.87341e+06	1	9.84748e+07	3	2.71473e+07	2							1.2381e+08	3	1.25268e+08	1	1.92134e+08	3					1.54137e+08	3									2.75156e+08	3	4.11584e+07	2	2.47364e+08	3			8.06293e+07
expobiome_smorf_12230024							7.01091e+07	1																															7.78018e+07	1			8.69742e+07	2	3.90923e+08	2
expobiome_smorf_12231496	3.5705e+07	1					3.25189e+06	1	1.432e+07	1			2.36812e+07	1	2.68792e+07	2					3.90184e+07	2			1.46794e+07	1					2.92345e+07	1	3.53542e+07	2							1.20743e+07	1	6.85421e+07	2	1.14479e+08	2
expobiome_smorf_12232625	8.74916e+07	2					1.41837e+07	1	4.43555e+07	2			5.65979e+07	1									2.0361e+07	1																	5.16906e+07	2	4.08544e+07	2	6.797e+07	2
expobiome_smorf_12233814							1.78222e+07	1																															4.31023e+07	1	1.17538e+07	1	2.38952e+07	1	9.864e+07	1
expobiome_smorf_12234625							8.21001e+07	1																															8.4538e+07	1			4.11443e+07	1	2.42257e+08	1
expobiome_smorf_12234739	6.49483e+07	2					6.71407e+07	2					3.52394e+07	1	4.31227e+07	2									2.00209e+08	4					1.25604e+08	2																	1.34993e+08
expobiome_smorf_12235229	4.59627e+07	1							6.46886e+07	1	3.53751e+07	1	3.71781e+07	1	4.70875e+07	1	2.27792e+08	1					7.44442e+07	1	1.02336e+08	1	7.71379e+07	1	2.03885e+07	1			5.64604e+07	1	2.61075e+07	1	5.39124e+07	1							3.25516e+07	1			2.91501e+07
expobiome_smorf_12236249							1.66085e+07	1
expobiome_smorf_12237873	1.40397e+07	1											8.19717e+07	3																			2.28395e+07	1	1.08207e+08	3							7.63573e+07	2	8.66972e+07	3
expobiome_smorf_12237881	2.23836e+07	1	1.09464e+07	1			1.11135e+07	1	2.72594e+07	1											3.02488e+07	1									1.71131e+07	1	2.30707e+07	1	1.66373e+08	1					3.22106e+07	1	7.11801e+07	1					9.34059e+06
expobiome_smorf_12238693																	6.37169e+07	1					4.71076e+07	1
expobiome_smorf_12239995	3.47747e+07	2	1.93615e+08	2			8.43223e+06	1			2.0453e+08	2	1.33461e+08	2	8.03931e+06	1	6.31745e+07	2					5.1414e+07	1			2.30036e+08	2			1.54515e+08	2	7.69176e+07	2	1.24434e+08	2	1.73739e+08	2	9.39652e+07	2			1.82451e+08	2	7.91003e+07	2	3.76175e+07	2	1.27453e+08
expobiome_smorf_12240070	2.98548e+07	1	6.37022e+07	1	2.40791e+07	1									2.50043e+07	1																					4.96138e+07	1									4.07952e+07	1	3.62048e+07
expobiome_smorf_12240428	6.08245e+07	2							6.20288e+07	3											7.14626e+07	2																							1.07996e+08	3			6.36768e+06
expobiome_smorf_12243153	1.93956e+07	1																																	4.54493e+07	2							3.83207e+07	2	2.01548e+07	1
expobiome_smorf_12244402	2.5949e+08	3	3.90242e+08	3			1.83818e+08	3			2.68899e+08	3	2.15738e+07	1							4.06378e+07	1	2.17757e+07	1	1.01919e+08	1	1.51138e+08	1					3.03505e+08	3	4.48722e+07	1
expobiome_smorf_12244561	4.86515e+07	2							1.10724e+08	4			1.44014e+07	1	4.24562e+07	2	4.46317e+08	6					1.55702e+08	4	4.08856e+07	1	8.13918e+07	2			4.22913e+07	3	9.95504e+07	2	1.58791e+07	1					5.60002e+07	2			2.78014e+07	1			3.62372e+07
expobiome_smorf_12245130	1.88667e+08	2	4.72534e+08	3			4.59081e+08	3			4.08384e+08	3	3.71519e+07	1							2.3005e+07	1	1.68388e+07	1	5.81106e+07	2	7.72837e+07	1					8.32035e+07	2	3.89675e+07	1
expobiome_smorf_12245738																	1.49021e+08	4																							6.14699e+07	2
expobiome_smorf_12246345	3.47088e+07	1	1.08116e+08	2									8.33638e+06	1																	1.74469e+08	1			1.21376e+07	1							8.974e+07	2	3.06188e+07	2	9.02314e+07	2
expobiome_smorf_12246561	3.15175e+07	1			1.0949e+08	1	5.25535e+07	1					1.52005e+07	1			4.84661e+08	6					1.14854e+08	2	1.94081e+08	3	6.11394e+07	1							9.54093e+07	3							4.30929e+07	1	2.97937e+08	4
expobiome_smorf_12249556	6.9419e+07	3	2.11566e+08	3	1.28504e+08	2			1.98868e+07	2	1.59009e+08	3	9.76837e+07	2			9.58324e+06	1					1.0817e+08	2			1.3836e+08	2					1.63694e+08	4					6.79957e+06	1	1.07988e+08	3	7.52362e+06	1	2.23877e+07	1	1.15599e+07	1
expobiome_smorf_12249558	4.45561e+08	4			1.00948e+08	2	3.1885e+07	1	5.81224e+08	4	1.79925e+08	1	3.69003e+08	4	5.07158e+07	2	2.88764e+07	1	2.73522e+07	1			2.40884e+08	4			3.09637e+08	4	6.30361e+07	2			4.0317e+08	5	3.96386e+07	2					1.56475e+08	3	4.94285e+07	2	2.92062e+08	1	1.1743e+08	3
expobiome_smorf_12250047	1.53897e+09	5	1.33034e+09	5	6.59769e+08	3			5.87466e+08	2			6.66584e+08	2	3.12028e+08	3							2.23604e+09	6															6.31028e+08	5					7.81292e+08	3	2.6882e+08	1
expobiome_smorf_12252348	2.39357e+08	4	1.08808e+08	2					1.22897e+08	3	8.70787e+07	2	4.13424e+07	1							1.00296e+07	1	4.56855e+07	1	1.82572e+07	1	2.57975e+07	1			4.68503e+07	1	9.7772e+07	2	7.64455e+07	2			3.62926e+07	1	2.176e+07	1	3.35317e+07	1
expobiome_smorf_12252623	4.46396e+07	1	1.16563e+08	1			4.28133e+07	1			7.684e+07	1											1.8417e+07	1	3.49735e+07	1	7.37687e+07	1					9.39902e+07	2
expobiome_smorf_12254593	1.32359e+08	2	9.30529e+07	2					2.27485e+07	1			8.25898e+07	1									6.43758e+07	2			1.08523e+07	1											3.71643e+07	1					8.91336e+07	2
expobiome_smorf_12255527	4.91771e+07	2	2.90112e+07	1									3.54685e+07	1			2.77833e+07	1													3.26538e+07	1			6.36627e+07	2	1.09379e+07	1
expobiome_smorf_12257671	3.08353e+08	3					6.19207e+07	2	9.4094e+07	3			2.81165e+08	4	6.71931e+07	2					2.72411e+07	1	1.93531e+08	4											2.2748e+07	1	1.20379e+08	3	1.76134e+08	2	4.49659e+08	5	2.28751e+08	3	1.92395e+08	4
expobiome_smorf_12257717	2.39282e+07	1									5.63143e+07	1	1.25269e+07	1			9.92625e+08	5					1.29732e+08	4	4.23917e+07	1	4.9135e+07	1			2.19753e+08	3	5.50029e+07	2			2.29459e+08	3			2.44716e+08	3			1.77495e+07	1
expobiome_smorf_12258073			2.30534e+07	1											6.63618e+07	2																			7.14083e+07	2									8.12e+07	2
expobiome_smorf_12258936							1.32258e+08	2																															8.9976e+07	2	6.65338e+07	2			2.5642e+08	2
expobiome_smorf_12260071	1.60245e+08	5	1.536e+08	3			7.12001e+08	5			3.06692e+08	5			3.48059e+07	2			2.03515e+07	1	2.28643e+07	1			2.21301e+07	1	9.29549e+07	3							1.70695e+07	1			1.52289e+08	4			2.09292e+07	1	1.60982e+07	1
expobiome_smorf_12261230	1.61664e+07	1	1.19872e+07	1			1.11737e+07	1	4.91859e+07	1			9.77511e+06	1			6.63688e+06	1			2.92768e+07	1	5.2442e+06	1	8.40108e+06	1	2.65981e+07	1			1.83551e+07	1	4.76712e+07	2	1.05814e+07	1	3.02859e+07	2			1.37852e+07	1	2.08017e+07	1			1.515e+07	1	1.56036e+07
expobiome_smorf_12261379	2.09705e+07	1	4.16844e+07	1	1.56538e+07	1							2.78509e+07	1											3.9303e+07	1	2.37858e+07	1	5.28203e+07	1															3.08485e+08	2
expobiome_smorf_12262104	8.6752e+07	2	4.23811e+08	5			1.32956e+08	3			1.21037e+08	2									9.01946e+06	1	1.05638e+07	1	1.66773e+08	3	1.21262e+08	3					2.66199e+08	3
expobiome_smorf_12262956							7.47553e+07	1			1.05173e+08	1															2.88925e+07	1					6.79638e+07	1
expobiome_smorf_12264724	2.33428e+07	1	1.858e+07	1			8.1532e+07	2	2.11117e+07	1							1.62307e+08	3			2.80297e+07	1					1.4971e+07	1									3.02609e+07	2	1.27695e+07	1	2.01383e+08	2					1.54241e+07	1	4.41108e+07
expobiome_smorf_12264727	1.81412e+07	1	2.3946e+07	1			6.00672e+07	1			1.16627e+07	1					1.07677e+08	2									1.13525e+07	1			2.41272e+07	1	3.22465e+07	1			1.52205e+07	1	1.07713e+07	1	8.43762e+07	1	1.06682e+07	1			1.71435e+07	1
expobiome_smorf_12264732	4.97086e+08	4	8.95401e+07	2			6.72232e+07	2	3.89429e+08	3	5.0901e+07	2	4.0798e+07	1	1.13152e+08	2	9.74984e+07	1			4.8272e+08	4	3.56914e+07	1	3.47671e+07	1	5.23511e+08	4			1.79214e+08	3	2.67324e+08	3	5.57827e+07	1	7.54677e+07	1	3.72291e+08	4	1.15714e+08	2	1.9068e+08	3	1.14517e+07	1	2.73516e+08	2	8.20136e+07
expobiome_smorf_12265003					1.97698e+07	1																			2.75678e+07	1
expobiome_smorf_12265004
expobiome_smorf_12265646	6.1909e+07	1	6.70071e+07	2			1.26426e+07	1	3.88468e+07	1			1.11122e+08	2	2.14165e+07	2					6.21794e+07	1									3.73144e+07	1	6.8644e+07	1	3.38561e+08	2					9.77486e+07	1	1.90165e+08	1	2.54026e+08	2			4.52744e+07
expobiome_human_006014																	6.72782e+08	2	4.57453e+08	1	1.09212e+09	2											7.0446e+08	2					5.28066e+08	1	1.69814e+09	2
expobiome_human_013288	7.87012e+07	3	2.5005e+08	4	1.04533e+08	3	3.25116e+08	5	2.52091e+08	5	2.4029e+07	1	1.39822e+08	5	3.79981e+07	1	4.41884e+07	3	3.5578e+08	6	6.42675e+07	3	1.52836e+08	4	2.47601e+07	2	8.76111e+07	3			1.02543e+08	4	6.16641e+07	2	8.16004e+07	3	1.3196e+08	2	7.34282e+07	4	1.1285e+08	4	1.11225e+08	4	5.1153e+07	3	3.54175e+07	2
expobiome_human_018969																																	2.70042e+06	1
expobiome_human_040048	4.3599e+07	1	3.49423e+07	1	4.34796e+07	1	3.28223e+07	1	1.58943e+07	1	4.08458e+07	1	8.37511e+06	1	8.03397e+07	1	1.0217e+07	1	1.38147e+08	1	2.97517e+07	1			1.2826e+07	1	2.96426e+07	1			8.01061e+07	1	9.1964e+06	1	7.56226e+06	1	1.77731e+07	1	1.95355e+07	1	3.22491e+07	1	6.67914e+07	1	2.42543e+07	1	3.31506e+07	1	1.05182e+08
expobiome_human_054031	5.16786e+07	3	6.32165e+08	4	3.00221e+08	3	2.02091e+08	3	1.31945e+08	3	4.80109e+07	2	7.08375e+07	3			1.82584e+07	1	2.61065e+08	3	1.19877e+08	3	1.68929e+08	3	1.8496e+07	1	6.6247e+07	3			1.89678e+08	3	5.1788e+07	2	3.30861e+07	1	1.44381e+08	3	1.85701e+07	1	3.37022e+07	1	1.33141e+08	3	1.77453e+08	3	5.08768e+07	2	8.01244e+07
expobiome_human_075975			2.38815e+07	1	7.72736e+06	1	2.87203e+07	2											7.36529e+07	3											6.19527e+06	1	6.10992e+06	1			6.41199e+06	1			3.07143e+07	1	2.17397e+07	1
expobiome_human_076648	5.29513e+07	1	1.40387e+08	1	1.81699e+08	1	5.41203e+08	1	1.23519e+07	1	1.57947e+08	1	1.95063e+07	1	3.67542e+07	1	2.66033e+08	1	5.92686e+08	1	8.98648e+07	1	1.13652e+08	1	4.32303e+07	1	6.80312e+07	1	3.38765e+07	1	1.31756e+08	1	5.48266e+07	1	1.65841e+07	1	2.93348e+08	1	3.44533e+07	1	3.09754e+08	1	8.24291e+07	1	1.17238e+08	1	4.2168e+07	1	3.17636e+08
expobiome_human_100220	2.14024e+07	1											6.13153e+07	1					3.5648e+07	1													4.11192e+07	1
expobiome_imp_00324372																															1.20847e+08	3
expobiome_imp_00328659
expobiome_imp_00685878																																	8.99192e+07	3
expobiome_imp_02182791																																	9.20933e+06	1
expobiome_imp_02197808																															1.17441e+07	1													2.44257e+07	1
expobiome_imp_02214944																																	4.2938e+06	1
expobiome_imp_02303945																																	4.98044e+07	1
expobiome_imp_02873290																															3.82796e+07	1									4.31867e+07	1
expobiome_imp_03069592																																	1.07796e+07	1
expobiome_imp_03333092																															1.35884e+08	2
expobiome_imp_03963191																																	1.14613e+07	1
expobiome_imp_06258958													2.4846e+07	1	1.1965e+07	1											2.02008e+07	1			1.64334e+07	1									1.05164e+07	1
expobiome_imp_06682305																															6.86834e+07	1
expobiome_imp_07342993																															5.80647e+07	2
expobiome_imp_08757060
expobiome_imp_09699034																															1.58829e+07	1
expobiome_imp_09842371																																	6.20788e+07	1
expobiome_imp_10123297																																	2.98152e+07	1
expobiome_imp_10647809							6.51913e+06	1			2.28594e+07	2																					2.98119e+07	2
expobiome_imp_10671290																	8.98674e+07	2					7.84436e+06	1									2.3387e+08	3	4.28789e+07	2
expobiome_imp_10720926											1.57286e+08	4									1.11808e+08	2	9.25975e+08	4	9.15793e+07	2					1.43391e+08	3	6.12908e+08	4									6.53172e+08	4
expobiome_imp_10740886
expobiome_imp_10766852																																	1.06682e+07	1
expobiome_imp_10831174																																	2.21117e+07	1
expobiome_imp_10916237									3.53039e+07	2																	6.15497e+07	2					6.02949e+07	2
expobiome_imp_11313701																																	5.36916e+06	1
expobiome_imp_15836617																																	5.89222e+07	1
expobiome_imp_16379308																																	3.07554e+07	1									4.48614e+07	1
expobiome_imp_16724517																							2.1958e+08	4									1.1751e+08	3	1.01979e+08	3									1.53388e+08	3
expobiome_imp_16847483															1.76564e+07	2															3.49192e+07	2															1.64156e+07	2	7.51558e+07
expobiome_imp_17018756																	5.46883e+08	3			4.89051e+08	3	6.53123e+07	1									4.62131e+08	3
expobiome_imp_17049226																															5.95029e+07	1
expobiome_imp_17930496																																	1.90585e+07	1
expobiome_imp_18732550																																	4.05482e+07	1
expobiome_imp_18773760	2.33853e+07	2	5.84366e+07	1			9.96397e+06	1			3.448e+07	2											1.31116e+07	1			1.00729e+07	1					3.81241e+07	1	5.25142e+06	1					2.43052e+08	3			8.19418e+06	1
expobiome_imp_18781557			1.72658e+07	1							4.2685e+07	1					4.95449e+07	1			1.0233e+07	1			2.03131e+07	1					1.48508e+07	1	2.09547e+07	1											2.44081e+07	1
expobiome_imp_18810511							1.03557e+07	1	1.09393e+07	1	1.2193e+07	1					7.36563e+06	1	9.69461e+06	1											1.25637e+07	1	1.18458e+07	1
expobiome_imp_18825645									1.05871e+08	1							1.39862e+08	2					3.622e+07	1	6.0597e+07	1							1.15275e+08	1					6.70954e+07	1	2.58193e+07	1
expobiome_imp_18858110	3.74951e+07	1			1.43317e+07	1	1.25528e+07	1	1.05182e+07	1	2.1832e+07	1					9.82284e+07	1	3.54534e+07	2	9.75494e+06	1			9.58492e+06	1					2.32061e+07	1	1.57423e+07	1	1.94821e+07	1	3.05494e+07	1	3.55216e+07	1	4.81954e+07	2			4.55348e+07	1
expobiome_imp_18860798	7.16404e+07	1
expobiome_imp_18922167	9.02058e+07	2															1.3453e+07	1															2.86211e+07	1
expobiome_imp_18928169	2.57049e+07	2	6.8863e+07	3					9.37737e+06	1					3.04026e+07	3	4.39731e+07	2	2.3909e+07	2	2.52021e+07	2	1.12946e+07	1									1.19582e+08	4
expobiome_imp_18932162													2.22233e+07	1	2.90801e+07	1															1.35208e+07	1
expobiome_imp_18936584	4.03736e+07	1																			9.7699e+06	1	6.63772e+07	3									1.91814e+07	1	2.95144e+07	2									1.18193e+08	3			3.27123e+07
expobiome_imp_18942764													3.04732e+07	1																	1.09674e+07	1	1.41313e+07	1									1.26877e+07	1
expobiome_imp_19694251																																	7.14997e+07	1
expobiome_imp_20119086																																	1.87584e+07	1
expobiome_imp_20865133
expobiome_imp_20868619																															4.48709e+06	1
expobiome_imp_21016742
expobiome_imp_21088469																																	9.49691e+06	1
expobiome_imp_23888658
expobiome_imp_24148117																																	1.58807e+07	1
expobiome_imp_26832971																																	1.69723e+07	1	7.46995e+06	1
expobiome_imp_26923065																																	7.99158e+06	1
expobiome_imp_27017789																																	1.10776e+08	1
expobiome_imp_30118901
expobiome_imp_30136536																																	9.11051e+06	1
expobiome_imp_30176130																																	2.20986e+08	2
expobiome_imp_30212315																															2.50674e+07	2
expobiome_imp_30256945																																	2.53493e+06	1
expobiome_imp_30259261																																	5.46175e+06	1															6.05373e+07
expobiome_imp_30283988																																	8.38225e+07	2							2.49134e+07	1
expobiome_imp_30819225
expobiome_imp_31812911																															1.18623e+08	2
expobiome_imp_31924644					1.02815e+08	1																									1.06646e+08	1
expobiome_imp_32296151					1.8139e+07	1							2.62295e+07	1													2.93223e+07	1					4.41869e+07	1					2.34312e+07	1
expobiome_imp_32359705																																	1.38273e+08	1
expobiome_imp_34934177
expobiome_imp_35020155					6.53238e+06	1			4.6038e+06	1																	4.82595e+06	1	5.81349e+07	1			6.85719e+06	1	3.89118e+06	1					6.43238e+06	1
expobiome_imp_35100857																																	1.22032e+07	1
expobiome_imp_35115123
expobiome_imp_38464153
expobiome_imp_38537677																																	1.71024e+07	1
expobiome_imp_38682365																																	2.83466e+07	1
expobiome_imp_38700308
expobiome_imp_38755073																																	3.83141e+07	2
expobiome_imp_38768508																																	1.41121e+07	1
expobiome_imp_39577806																																	1.25835e+08	1
expobiome_imp_40612229																																	4.69707e+07	1
expobiome_imp_41166324																																	7.89742e+07	3											3.60332e+07	1
expobiome_imp_41261975																																	1.82191e+07	1
expobiome_imp_41309791																																	2.73418e+08	1
expobiome_imp_43391214																																	1.93726e+08	3					1.84324e+07	2					4.564e+08	3
expobiome_imp_43466012
expobiome_imp_43666877																																	3.61917e+06	1											2.88842e+06	1
expobiome_imp_43692166					2.41502e+07	1																	2.2758e+07	1			4.19587e+07	1			5.0799e+07	1	3.386e+07	1	2.74433e+07	1					1.82685e+07	1	1.59821e+07	1	2.5605e+07	1	3.45852e+07	1
expobiome_imp_44253004																																	8.71671e+06	1
expobiome_imp_44984255
expobiome_imp_47448490																																	1.45532e+07	1
expobiome_imp_47453994																																	1.50283e+07	1			1.57854e+07	1			5.72007e+06	1
expobiome_imp_47457535	3.19429e+07	1																															8.81727e+07	1
expobiome_imp_47460264					1.39054e+07	1	8.29213e+06	1			1.2304e+08	1					1.20415e+08	1	5.74635e+07	1	7.78526e+06	1									2.13048e+07	1	1.45227e+09	1			2.23982e+08	2			3.14467e+07	1
expobiome_imp_47460279	2.65447e+07	1															2.88025e+07	1			1.99917e+07	1											2.16621e+07	1	2.6446e+07	1					2.56362e+07	1			4.16301e+07	1
expobiome_imp_47462699	4.02399e+08	1					5.11923e+07	1	7.85799e+08	1							5.25904e+08	1	6.53773e+07	1	1.89678e+08	1	7.33718e+08	2							6.17571e+08	2	2.65303e+08	1
expobiome_imp_47470855									6.22894e+07	1													5.95995e+07	1							1.68271e+08	2	8.65168e+07	2
expobiome_imp_47471233					1.08654e+07	1											1.25246e+07	1	1.28874e+07	1			6.55696e+07	1			1.59114e+07	1									1.16349e+07	1	2.33211e+07	1	1.06215e+07	1			2.13431e+07	1
expobiome_imp_47482703							4.91059e+07	1																									1.99367e+07	1
expobiome_imp_47486711			4.47051e+08	1	8.04689e+07	1			1.127e+08	1	1.36599e+08	1	2.84395e+08	2	2.55908e+06	1			1.74768e+07	1			1.63233e+08	1					4.10437e+07	1	1.09707e+08	1	5.47308e+08	1	1.70207e+08	1							8.1817e+07	2	9.18193e+07	2	2.6425e+07	1	1.08907e+08
expobiome_imp_47493605											3.99684e+07	2							1.63087e+07	1			2.28965e+07	2							2.66228e+07	1	9.41041e+06	1							4.1381e+07	3
expobiome_imp_47494364	3.92464e+07	1	7.09509e+07	1	4.93121e+07	1	3.89835e+07	1	9.27152e+07	2	5.53235e+07	1	5.73278e+07	1					1.84922e+08	1	2.70167e+07	1	5.46203e+07	1	5.0246e+07	1	5.79538e+07	1			2.16128e+08	2	1.39372e+08	1	6.20139e+07	1	7.61304e+07	1			4.45121e+07	1	8.74246e+07	1			5.46917e+07	1	8.11425e+07
expobiome_imp_47495195			7.069e+07	3													3.43071e+07	1			3.18434e+07	1					7.64659e+06	1			5.39197e+07	3	9.3387e+06	1			2.95052e+07	1	2.77703e+07	1	4.30122e+07	2	1.42607e+07	1	4.40764e+08	4
expobiome_imp_47496177			9.49909e+06	1																					5.83697e+06	1							7.56409e+07	2
expobiome_imp_47497557	4.68495e+07	3	4.55983e+07	3			5.17518e+07	2	1.12602e+08	3							1.20095e+07	1	5.6983e+07	3			7.8532e+07	3							1.71217e+07	1	8.11948e+06	1							6.94303e+07	3			3.01832e+07	2
expobiome_imp_47511284							1.02457e+07	1			1.62342e+08	1					1.04288e+08	1							1.91332e+07	1							1.73642e+07	1
expobiome_imp_47515900																																	1.15532e+07	1
expobiome_imp_47538610	1.94116e+08	2																															2.95284e+08	3
expobiome_imp_47546230	6.35952e+06	1					2.18532e+07	1			5.26135e+07	2													2.98737e+08	5					4.60193e+07	3					8.08126e+07	2											2.63038e+07
expobiome_imp_47549029					1.77252e+07	1					1.72241e+07	1													8.80599e+07	2							7.72006e+07	2	2.07511e+07	1
expobiome_imp_47550091							3.46168e+07	1																									2.69982e+07	1
expobiome_imp_47551412																			8.156e+07	1					2.29146e+08	1					1.39795e+08	1
expobiome_imp_47557748																															3.34933e+07	1	5.50768e+07	1
expobiome_imp_47563710							2.17877e+08	2					2.53489e+07	1															3.62414e+07	1	1.08232e+07	1	7.91161e+06	1			7.4996e+07	2	5.71838e+07	1	1.612e+07	1
expobiome_imp_47565890	8.39764e+06	1									2.23082e+07	2					9.74268e+06	1	7.11036e+06	1											7.56393e+06	1	7.5451e+06	1			1.6585e+07	1	2.08424e+07	2	1.41256e+07	1			1.20932e+07	1
expobiome_imp_47580317	2.68457e+08	1					1.74641e+08	1	3.58903e+08	1	1.89614e+08	1	1.5114e+08	1	2.76817e+08	1	5.5279e+08	1	3.79156e+07	1	6.51245e+07	1	1.03957e+08	1	1.96617e+08	1	2.39826e+08	1	1.39304e+08	1	2.97746e+08	1	3.3025e+07	1	2.51437e+08	1	1.41932e+08	1	2.05868e+08	1	1.78366e+08	1	1.48251e+08	1	1.90721e+08	1	7.22254e+07	1	5.71035e+07
expobiome_imp_47595641	2.23558e+07	1															6.81198e+07	1													1.22915e+07	1	1.88735e+07	1					8.15381e+06	1	1.80414e+07	1
expobiome_imp_47595643	1.04453e+08	1			2.21817e+07	1	2.44429e+07	1	4.5138e+07	1	6.5082e+06	1			1.50769e+07	1			4.75109e+07	1	2.09896e+07	1			3.68179e+07	1					6.1943e+07	1	6.91225e+07	1	6.50146e+07	1	1.02929e+08	1	4.53157e+06	1	3.89474e+07	1	3.56487e+07	1	8.50409e+07	1
expobiome_imp_47599758																							4.84841e+07	2							1.90836e+07	1	1.39102e+07	1									1.95565e+07	1
expobiome_imp_47603603			1.84998e+07	1							1.50099e+07	1											1.30911e+07	1									2.85041e+07	1	5.12535e+07	1			2.29628e+07	1			1.62378e+07	1					1.81209e+07
expobiome_imp_47607058			2.02181e+07	1			5.41573e+07	1									3.16196e+07	1			2.31284e+07	1	3.34217e+07	1			4.23083e+07	1					1.78102e+07	1			6.33938e+07	1	6.92071e+07	1	3.37802e+07	1	5.35833e+07	1	4.73569e+07	1	3.65773e+07	1	6.15472e+07
expobiome_imp_47607823													5.20155e+07	2							1.02005e+07	1											7.35871e+06	1							3.33855e+07	2
expobiome_imp_47623698	1.85697e+07	1					1.96381e+07	1							1.22041e+07	1																	1.11108e+07	1					1.66387e+07	1			1.01787e+07	1	2.54323e+07	1
expobiome_imp_47634843	5.04944e+07	1	1.47831e+07	1					1.32061e+08	1	1.16108e+08	1			5.98046e+07	1	7.0345e+07	1					1.90987e+07	1	6.39461e+07	1	1.51754e+07	1			5.32731e+07	1	1.36895e+08	2	1.09849e+08	1	4.79706e+06	1	2.67878e+07	1			3.50356e+07	1	1.00081e+08	1	6.3207e+07	1
expobiome_imp_47649719					5.49872e+07	1	2.47015e+08	3			9.42082e+07	2	9.10372e+07	3	5.64256e+06	1					1.13854e+07	1					1.12848e+08	3					2.3684e+08	4					2.50944e+08	3			1.2033e+08	3			2.97534e+07	1	7.13667e+06
expobiome_imp_47660363			4.23461e+07	3	1.62372e+07	1																											6.80485e+07	5							2.1668e+07	2
expobiome_imp_47675332											9.32272e+07	2											4.13707e+06	1							5.01705e+06	1	1.44508e+07	1	1.48538e+07	1					1.55684e+07	1
expobiome_imp_47680088																															3.93113e+07	1			6.71157e+07	1
expobiome_imp_47680093					4.67074e+07	1	2.65707e+07	1									1.65087e+08	2					9.26576e+07	1							5.61421e+07	1					1.26864e+07	1							3.49834e+07	1
expobiome_imp_47689584					2.559e+07	1					5.31797e+07	2					6.16843e+07	1	1.22876e+08	2											2.72267e+07	1	2.384e+07	1	1.48772e+07	1	1.00658e+08	2	3.39273e+07	1	2.55259e+07	1			2.17194e+07	1
expobiome_imp_47689591	1.20487e+07	1							9.13243e+06	1					7.00162e+07	1	1.01324e+08	1	9.38033e+07	2	4.93555e+07	2									2.42276e+07	1	6.92144e+07	2	5.2926e+07	2	6.81122e+07	2	4.77677e+07	2					1.44947e+07	1
expobiome_imp_47689593																			1.60973e+07	1													8.69219e+06	1			5.07583e+07	2	1.04001e+07	1
expobiome_imp_47689594																	1.09719e+08	2															2.76039e+06	1			2.66905e+07	1			3.83209e+07	1
expobiome_imp_47689600																			1.24234e+07	1	1.30865e+07	1			1.15343e+07	1							1.71316e+07	1	1.08671e+07	1	1.03572e+07	1	2.67617e+07	2	8.46041e+06	1			1.49697e+07	1
expobiome_imp_47699075																																	5.43205e+07	2			1.03042e+07	1
expobiome_imp_47703087			9.28547e+06	1													7.22553e+06	1															6.50724e+06	1											4.65021e+06	1
expobiome_imp_47714706													1.75526e+07	1											1.50265e+07	1							3.30099e+07	1							2.85276e+07	1
expobiome_imp_47719565																																	3.54002e+06	1
expobiome_imp_47730876	3.39399e+08	1	2.09129e+08	1					1.26771e+08	1			3.95791e+08	1	2.0373e+08	1	2.55809e+08	2													1.14128e+08	1													3.23734e+07	1
expobiome_imp_47737861	2.82609e+08	1									1.22663e+08	1					7.48776e+07	2									2.02663e+08	1					2.76572e+07	1			7.11785e+06	1
expobiome_imp_47744824	1.11122e+08	4	1.86701e+07	1			5.87421e+07	3	2.5577e+07	2	2.75071e+08	4			1.77657e+07	1	1.2661e+08	4	7.23062e+07	3	5.09555e+07	3	2.73488e+07	1	3.26134e+07	2	6.71366e+06	1			4.55955e+07	2	2.68782e+08	5	9.72269e+07	5	1.8529e+08	3	2.24084e+07	2	8.02326e+07	3	9.65809e+07	3	1.02489e+08	3
expobiome_imp_47779501
expobiome_imp_47779702																	2.88968e+07	2					3.51928e+07	2	2.82855e+08	4							1.34244e+07	1			3.26254e+07	2
expobiome_imp_47780665	1.90036e+08	4	1.87626e+08	4					8.53783e+07	5	2.92342e+08	5			1.51662e+07	1	4.37445e+08	6	2.53966e+08	4							9.62817e+07	3			2.28288e+08	5	1.89019e+08	4	1.86901e+08	6	1.35571e+08	4			1.2571e+08	3	9.72434e+07	3	2.24727e+08	4	3.22255e+07	2	8.3529e+07
expobiome_imp_47780667							8.79387e+06	1			1.55076e+07	1																					7.57843e+06	1	9.99593e+06	1									8.99787e+06	1
expobiome_imp_47787532	3.27245e+07	1	2.4616e+07	1					3.69034e+06	1			8.75631e+07	2									1.14534e+07	1									4.38725e+07	1					2.27647e+07	1			3.55675e+06	1	5.49972e+07	1
expobiome_imp_47793193																																	9.00013e+06	1							4.73678e+07	2
expobiome_imp_47800636																															1.23671e+07	1
expobiome_imp_47806807	9.1335e+07	2			3.68718e+07	2			9.54817e+07	3	4.49455e+07	2			7.14566e+07	2	6.47456e+07	1	6.85982e+07	2	1.8928e+07	2	1.35881e+07	1							4.36905e+07	2	9.58254e+07	3	8.9962e+07	2	1.36721e+08	2	1.06783e+08	2	3.96099e+07	2	1.1107e+07	1	2.71211e+07	1
expobiome_imp_47824753											7.75474e+06	1					5.6092e+08	2			1.04504e+07	1											2.13728e+07	1			3.31934e+07	1	1.42006e+07	1
expobiome_imp_47831982	4.4629e+07	1	6.17839e+07	1			1.42848e+07	1									9.76279e+07	1					8.08275e+07	1	8.00635e+07	1	7.26907e+07	1			4.87723e+07	1	1.23438e+08	1			1.27952e+08	1	3.42832e+08	1	3.76292e+07	1	2.89316e+08	1	2.53078e+07	1	1.57024e+07	1
expobiome_imp_47836631																			1.40661e+07	2													4.71178e+06	1			5.168e+06	1			6.38794e+06	1
expobiome_imp_47836781							1.99953e+07	1																							1.94203e+07	1	1.01874e+07	1											2.59192e+07	2
expobiome_imp_47842049			2.77445e+08	3					1.73964e+08	5	2.15031e+07	1	1.28588e+08	3									1.11469e+08	3			1.44517e+08	3					9.21705e+07	2									5.14658e+07	3	2.44939e+08	5
expobiome_imp_47844666
expobiome_imp_47849558	2.74507e+08	3			3.38863e+07	2	3.43237e+07	2	3.1782e+07	2	9.73529e+07	3					1.28411e+08	3	1.27314e+08	2	6.61516e+07	2			7.76974e+07	2					8.89465e+07	2	1.44805e+08	3	2.52594e+07	2	3.07849e+08	5	1.98217e+08	4	5.28928e+07	2
expobiome_imp_47860516			4.99181e+06	1			4.12155e+06	1																									1.26245e+07	1							4.23223e+06	1
expobiome_imp_47861565			1.39435e+07	1					1.99879e+07	1									4.79288e+07	1							1.58738e+07	1			3.86953e+07	1	3.42197e+07	1	1.85097e+07	1							2.17687e+07	1
expobiome_imp_47869254																			1.34176e+08	2									5.45442e+07	1			3.9525e+07	2
expobiome_imp_48122485																																	2.72948e+07	1
expobiome_imp_48177270																																	4.44673e+08	1
expobiome_imp_48180689																																	1.03009e+07	1
expobiome_imp_48204801																																	8.62539e+06	1
expobiome_imp_48212647																																	3.87274e+08	1
expobiome_imp_48223594																																	3.16133e+07	3
expobiome_imp_48226994																																	4.37243e+06	1
expobiome_imp_48228190																																	6.94724e+06	1
expobiome_imp_48229623																																	8.06741e+06	1
expobiome_imp_48234643																																	8.30968e+06	1
expobiome_imp_48234774																																	2.03689e+07	1
expobiome_imp_48236525																																	3.34089e+07	1
expobiome_imp_48249088																																	9.07429e+07	1
expobiome_imp_48254825																																	9.87327e+06	1
expobiome_imp_48259746																																	1.5092e+07	1
expobiome_imp_48260122																																	3.36661e+09	2
expobiome_imp_48261760																																	2.96486e+07	1
expobiome_imp_48269020																																	1.77151e+07	1
expobiome_imp_48277422																																	2.53532e+07	1
expobiome_imp_48295023																																	2.15423e+07	1
expobiome_imp_48296632																																	1.75002e+07	1
expobiome_imp_48302118																																	1.96811e+07	1
expobiome_imp_48310425																																	1.32754e+07	1
expobiome_imp_48313086																																	1.09854e+08	1
expobiome_imp_48314718																																	4.79259e+06	1
expobiome_imp_48315246																																	6.82772e+06	1
expobiome_imp_48335089																																	8.12387e+08	1
expobiome_imp_48335583																																	2.75471e+07	1
expobiome_imp_48341457																	1.00482e+07	1															5.99901e+07	1
expobiome_imp_48346042																																	1.08762e+07	1
expobiome_imp_48346554																																	1.23339e+07	1
expobiome_imp_48352018																																	1.20106e+07	1
expobiome_imp_48359542																																	3.83905e+07	1
expobiome_imp_48376433																																	1.2642e+07	1
expobiome_imp_48394539																																	4.16071e+07	2
expobiome_imp_48397653																																	3.29992e+06	1
expobiome_imp_48401595																																	2.85233e+06	1
expobiome_imp_48403005																																	4.48339e+07	1
expobiome_imp_48410849																																	1.33835e+08	1
expobiome_imp_48414950																																	9.47318e+06	1
expobiome_imp_48424028																																	1.46291e+07	1
expobiome_imp_48427082																																	8.83881e+07	1
expobiome_imp_48427148																																	6.52754e+07	1					5.31208e+07	1
expobiome_imp_48435085																																	1.22927e+07	1
expobiome_imp_48435972																																	4.14748e+07	1
expobiome_imp_48438290																																	2.89283e+08	1
expobiome_imp_48441424																																	9.33747e+06	1
expobiome_imp_48441763																																	5.13883e+07	1
expobiome_imp_48444953																																	1.23707e+08	1
expobiome_imp_48446927																																	1.11331e+07	1
expobiome_imp_48447788																																	8.36193e+07	2
expobiome_imp_48458831																																	7.5911e+06	1
expobiome_imp_48463486																																	1.5898e+07	1
expobiome_imp_48464497																																	1.19468e+07	1
expobiome_imp_48466125																																	7.14659e+06	1
expobiome_imp_48466438																																	3.53123e+06	1
expobiome_imp_48476141			2.05308e+07	1																													1.56019e+07	1
expobiome_imp_48476517																																	9.94359e+06	1
expobiome_imp_48484916																																	7.27637e+06	1
expobiome_imp_48488915																																	1.08921e+07	1
expobiome_imp_48723829
expobiome_imp_49125864							1.63594e+07	1																									5.77794e+06	1											1.13445e+08	4
expobiome_imp_49255762
expobiome_imp_49399686
expobiome_imp_49401567																															1.92629e+07	1
expobiome_imp_49416351
expobiome_imp_49446671
expobiome_imp_49459252
expobiome_imp_49462729
expobiome_imp_49466936
expobiome_imp_49475506
expobiome_imp_49494563																															1.80816e+07	1
expobiome_imp_49496912																															2.13148e+07	1
expobiome_imp_49499506																															3.98574e+07	1
expobiome_imp_49519197
expobiome_imp_49519302
expobiome_imp_49523623																															3.17868e+07	1
expobiome_imp_49536170
expobiome_imp_49537013
expobiome_imp_49559571
expobiome_imp_49567659
expobiome_imp_49579202
expobiome_imp_49629680																															3.40062e+08	4
expobiome_imp_49634863
expobiome_imp_49639082
expobiome_imp_49658335
expobiome_imp_49664523
expobiome_imp_49667219
expobiome_imp_49681334
expobiome_imp_49695180
expobiome_imp_49697922
expobiome_imp_49698909																															1.54102e+08	1
expobiome_imp_49707406
expobiome_imp_49727940
expobiome_imp_49739090																															5.72454e+06	1
expobiome_imp_49740317
expobiome_imp_49770637
expobiome_imp_49772313																															1.13074e+08	2
expobiome_imp_49782663
expobiome_imp_49821633
expobiome_imp_50319629																																	1.08234e+07	1
expobiome_imp_52662575																																	4.85263e+06	1
expobiome_imp_54166987																																	7.28401e+06	1
expobiome_imp_56425493																																	7.08563e+07	1
expobiome_imp_59200152																																	5.5396e+07	1
expobiome_imp_59218589																																	4.02733e+08	1
expobiome_imp_60506811																																	1.9328e+06	1
expobiome_imp_62697199																																	7.45132e+08	1
expobiome_imp_64930338																															2.73141e+08	5									7.53382e+07	1
expobiome_imp_65203780																															6.70458e+07	2
expobiome_imp_66540542																																	1.36331e+07	1			2.23754e+07	2
expobiome_imp_66604966																															1.81304e+07	1
expobiome_imp_67373452																																	1.90288e+07	1
expobiome_imp_67592730																																	1.29207e+09	1
expobiome_imp_68574387																																	7.50134e+08	4
expobiome_imp_68600353			5.12919e+06	1	6.54182e+06	1			7.53453e+06	1																							4.7646e+06	1			1.01343e+07	1	6.83075e+06	1	1.02874e+07	1	5.23583e+06	1			3.36259e+06	1
expobiome_imp_68603409																																	1.26578e+07	1
expobiome_imp_68669821			4.37795e+07	2	2.93194e+07	1	1.99356e+08	2			9.13375e+08	5			1.84057e+08	4	9.4712e+07	2			9.11252e+07	4	1.96845e+08	5			2.63246e+08	6	2.09983e+07	1			2.50231e+08	5	1.97247e+08	5			2.68175e+08	4	2.79822e+08	6	2.73653e+08	5	4.60275e+07	1	1.62351e+08	3	6.24601e+08
expobiome_imp_68718565											4.47488e+07	1																					9.1244e+08	7					2.16732e+07	1			2.43028e+07	1
expobiome_imp_68721880																													5.02171e+07	2
expobiome_imp_68743976																															7.79855e+06	1	1.19838e+07	1	5.08155e+06	1									1.00912e+07	1
expobiome_imp_68799128							3.14916e+07	1																									4.38734e+07	1
expobiome_imp_68818546													7.00039e+07	2			4.23409e+07	2									3.47305e+07	2					1.73882e+07	1
expobiome_imp_68856369																																	8.10476e+06	1
expobiome_imp_68870688			4.65085e+07	1											9.66587e+06	1															9.30461e+07	1
expobiome_imp_68915012			3.17668e+07	1	4.99792e+07	2	3.74603e+08	4	2.08959e+08	3			1.75455e+08	3			1.01899e+08	3			6.12033e+07	3	2.60892e+08	4			2.26892e+08	4					1.79807e+08	4	1.29961e+08	4	1.04299e+08	3	1.55326e+08	3	1.86769e+08	4	3.04731e+08	4	1.72346e+07	1			1.43319e+08
expobiome_imp_69017398																									1.26711e+08	2					6.17024e+06	1	1.04613e+07	1															5.48064e+06
expobiome_imp_73463933
expobiome_imp_73711184																															1.24312e+08	2
expobiome_imp_74993216																																	1.19011e+07	1
expobiome_imp_75873807																																	1.08694e+07	1
expobiome_imp_75989594																																	1.56392e+07	2
expobiome_imp_76006446																																	8.97178e+06	1
expobiome_imp_76379890																																	4.43016e+07	1
expobiome_imp_76933734
expobiome_imp_77900852																																	4.40481e+07	3
expobiome_imp_78079564
expobiome_imp_78173192
expobiome_smorf_00041081																															2.45111e+07	1
expobiome_smorf_00095094
expobiome_smorf_00197327																																	2.9687e+07	1
expobiome_smorf_00206042																																	1.07869e+07	1
expobiome_smorf_00236468																																	2.61034e+07	1
expobiome_smorf_00249570																																	2.41003e+07	2													8.67416e+06	1
expobiome_smorf_00256612																									2.37846e+08	5					1.11669e+09	5					1.06884e+09	6					4.10024e+08	1
expobiome_smorf_00454918
expobiome_smorf_00509597																																	4.24795e+06	1
expobiome_smorf_00548465																																	6.81e+07	3
expobiome_smorf_00556264																																	3.80461e+07	1
expobiome_smorf_00556268																																	6.21034e+07	2
expobiome_smorf_00616701																																	1.86629e+07	1
expobiome_smorf_00635525
expobiome_smorf_00706737																																	2.36055e+07	1
expobiome_smorf_00927518																																	8.69856e+06	1
expobiome_smorf_01108218																																	3.0779e+08	4
expobiome_smorf_01136063																																	2.15807e+07	2															3.67322e+07
expobiome_smorf_01194355																																	1.32673e+07	1
expobiome_smorf_01209132																																	2.94609e+07	2
expobiome_smorf_01413732																																	4.32652e+07	2
expobiome_smorf_01635886																																	3.66816e+06	1
expobiome_smorf_01684577																																	4.46686e+06	1
expobiome_smorf_01886245																																	6.87611e+07	2
expobiome_smorf_01890087											3.7147e+07	1																			5.40188e+07	1																	5.45854e+07
expobiome_smorf_01908174																																	1.29436e+07	1
expobiome_smorf_01959358																																	6.50285e+06	1
expobiome_smorf_01971588
expobiome_smorf_02149825			2.12723e+07	2							5.271e+07	2					9.09966e+07	2									1.84341e+07	1					8.49813e+07	3	1.23392e+07	1	4.27889e+06	1							1.95462e+07	2
expobiome_smorf_02149976											2.76513e+07	1											4.48245e+07	1							1.11571e+08	1	7.2329e+07	1							8.70007e+06	1	3.44964e+07	1			5.832e+06	1	1.41574e+08
expobiome_smorf_02151323																																	1.2957e+07	2											1.86165e+07	1
expobiome_smorf_02151903															1.08128e+07	1					9.6214e+06	1											1.66771e+07	1					3.28798e+07	1									5.31978e+07
expobiome_smorf_02152809			5.38817e+07	2	7.00134e+07	2	2.87158e+08	3	1.48266e+08	3	4.59368e+08	5	1.53649e+08	3	3.14905e+08	3	2.41856e+08	3			2.25761e+08	3	1.56662e+08	3			2.28537e+08	3	5.19466e+07	1			1.06116e+08	2	1.35967e+08	2			1.685e+08	3	1.8041e+08	3	1.88404e+08	3	7.11149e+07	2	6.8603e+08	3	2.95628e+08
expobiome_smorf_02153235											5.28641e+07	1					2.08734e+07	1					4.72186e+07	1			2.70573e+07	1					5.05174e+07	1							2.70917e+07	1
expobiome_smorf_02153316																							1.13743e+07	1									4.10935e+07	1	5.97575e+07	2									5.86171e+07	2			1.63257e+07
expobiome_smorf_02153317
expobiome_smorf_02153323			1.5061e+08	3									4.52273e+07	3							8.53758e+06	2											4.54703e+07	3	6.06667e+07	3									7.32925e+07	3			3.08768e+07
expobiome_smorf_02153324			8.71249e+07	2																													2.37435e+07	1
expobiome_smorf_02153425			4.97581e+07	1					4.74948e+07	1					1.0069e+07	1															2.22533e+07	1			2.60404e+07	1					3.39152e+07	1					2.82184e+07	1	1.85777e+07
expobiome_smorf_02153433																																	9.30698e+06	1
expobiome_smorf_02154272			2.37053e+07	1							1.95994e+07	1			8.44433e+07	1											3.02777e+07	1					3.86382e+07	1	2.62419e+07	1
expobiome_smorf_02155342																	2.49533e+07	1																							5.29944e+07	2
expobiome_smorf_02156346			1.51986e+07	2	4.38014e+06	1			2.32792e+07	2			3.64819e+07	2											8.51597e+06	1							3.02149e+07	2							3.71723e+07	2
expobiome_smorf_02157051																	4.9609e+07	1															5.26767e+07	1							7.15549e+08	3
expobiome_smorf_02157518			5.16942e+07	1					1.19763e+07	1	4.44401e+07	2					2.94963e+07	1					4.15279e+07	1			2.66735e+07	1					9.68312e+06	1							5.22714e+07	3	1.43193e+07	1	2.35e+07	1	1.01149e+07	1
expobiome_smorf_02157823			2.78651e+07	1			4.7021e+07	1	1.42538e+08	3	5.00376e+07	1	1.33004e+08	3	1.07068e+08	1					1.11742e+08	2	2.77327e+07	1			1.34781e+08	1			1.41656e+08	2	5.23011e+07	1	1.10605e+08	1					2.80837e+07	1	1.54515e+08	2	1.79273e+07	1			2.13452e+08
expobiome_smorf_02158372																	4.11982e+07	1													2.11814e+07	1											2.5174e+07	1
expobiome_smorf_02158477
expobiome_smorf_02158648			1.84262e+08	3	1.64055e+08	4	1.11106e+08	3	4.1321e+07	2			2.1618e+08	3	6.11149e+07	2			9.75133e+07	3			2.13916e+07	1	1.28778e+08	3	1.67164e+08	3					7.96546e+07	3			1.11813e+08	3	2.03501e+08	3	9.89542e+07	3			1.86276e+07	1	5.7717e+07	3
expobiome_smorf_02158651																																	5.62946e+06	1
expobiome_smorf_02159156											1.3651e+07	1					7.59034e+07	2															6.2899e+06	1
expobiome_smorf_02159413																															1.60901e+08	2
expobiome_smorf_02161276																							9.3825e+06	1									9.23916e+07	3					3.41966e+07	3	3.17094e+07	2					5.05574e+08	4	3.75515e+07
expobiome_smorf_02161486																					2.63046e+07	2											1.33285e+07	1
expobiome_smorf_02161944			3.67458e+07	1					6.04018e+06	1	8.61128e+07	2											8.24913e+07	2			6.22161e+07	2					4.38833e+07	1	3.21516e+06	1					3.45832e+07	1	6.04831e+06	1	2.02702e+07	1
expobiome_smorf_02162998			7.44968e+06	1																													1.40864e+07	1															1.43552e+07
expobiome_smorf_02163377																																	8.845e+06	1
expobiome_smorf_02165087																																	5.16011e+06	1
expobiome_smorf_02165332			2.88885e+07	1			1.70364e+07	1			2.10905e+07	1	1.80675e+07	1	1.30944e+07	1							6.23611e+06	1	2.86062e+07	1							1.47547e+08	5							1.50635e+07	1							2.68926e+07
expobiome_smorf_02165845			2.75967e+07	2	7.74496e+07	3																	4.7357e+07	2	4.28754e+07	2							7.1141e+07	3	1.01784e+08	4			2.90602e+07	1	3.39668e+07	1			1.24253e+08	2			2.72722e+07
expobiome_smorf_02167064			6.84812e+06	1																					2.64126e+07	1									1.46727e+06	1							6.23159e+06	1			6.97659e+06	1
expobiome_smorf_02169089							1.22754e+07	1																																	1.35249e+07	1							3.52358e+07
expobiome_smorf_02169090			1.83264e+07	1	3.15994e+07	1															4.56778e+07	1			1.10658e+08	2					5.81482e+07	1	5.49901e+07	1			4.94905e+07	2	7.92954e+07	2	1.12332e+07	1					5.19047e+06	1	1.38778e+08
expobiome_smorf_02170084																																	2.50188e+07	3
expobiome_smorf_02170125			1.24006e+09	6																	6.14932e+07	3											2.98975e+08	6	2.56175e+08	6													2.70189e+08
expobiome_smorf_02171042			1.07745e+07	1	1.97802e+07	1																			4.59116e+07	1					2.2798e+07	1	8.96029e+07	2					2.65501e+07	1	2.09705e+07	1			2.25003e+07	1			3.04484e+08
expobiome_smorf_02171818			1.0749e+08	3					5.7222e+07	2	6.43473e+07	2											6.21529e+07	2			2.85195e+07	1					2.83731e+07	2					2.14661e+07	1	1.40438e+07	1			6.66683e+07	2
expobiome_smorf_02173354			1.96938e+07	1	4.00997e+07	1			1.75313e+07	1					2.142e+07	1					5.71024e+07	1			6.81608e+07	1					3.30486e+07	1	1.15317e+08	1			3.56047e+07	1	5.18412e+07	1	1.13209e+07	1			3.60192e+07	1			1.04072e+08
expobiome_smorf_02173366			1.54225e+08	2									9.45379e+07	2	7.53046e+07	2																	5.47573e+08	2															6.89158e+07
expobiome_smorf_02174165																															8.14017e+06	1	8.50442e+06	1															7.82242e+06
expobiome_smorf_02174335																																	1.28699e+07	1	1.28129e+07	1									6.85831e+06	1
expobiome_smorf_02175516																																	5.00173e+06	1
expobiome_smorf_02176001			5.06068e+07	1							3.58675e+07	1																					1.36932e+07	1							1.29912e+07	1
expobiome_smorf_02176038			1.57633e+07	1	1.44721e+07	1			1.42327e+07	1			1.87019e+07	1											1.42161e+07	1							5.215e+07	2							7.39419e+07	2							2.40342e+07
expobiome_smorf_02176442			1.68516e+08	4									4.61859e+07	3																			3.60545e+07	2	9.68856e+07	4									2.90161e+07	1
expobiome_smorf_02176443			2.10038e+08	4									2.41671e+07	1							9.90621e+06	1											6.10192e+07	2	6.87242e+07	2									1.27345e+08	3
expobiome_smorf_02177126			6.71412e+07	2	2.52839e+07	1	4.01594e+08	3	2.82765e+07	1	5.7572e+08	4	5.27204e+07	1	7.31666e+07	1			6.41234e+06	1	7.01591e+07	2	2.19957e+08	3	3.67077e+06	1	3.33444e+08	3	4.12011e+07	1			1.08244e+08	2					1.5254e+08	2	3.61646e+08	3	2.86823e+08	3	1.82416e+08	3	1.7351e+08	2	4.85431e+08
expobiome_smorf_02177593			1.6996e+08	1											8.90273e+07	1																	1.47986e+08	1
expobiome_smorf_02178233																																	6.69826e+06	1
expobiome_smorf_02178807																					3.95948e+07	1											2.84409e+07	1					3.94368e+07	2					2.14264e+07	1			6.00765e+07
expobiome_smorf_02178808					2.60333e+07	1															2.77518e+07	1			4.47934e+07	1							3.31476e+07	1					3.96962e+07	1	2.59146e+07	1							5.37085e+07
expobiome_smorf_02179255
expobiome_smorf_02179786			3.57388e+07	1	8.32497e+07	1															5.9423e+07	1			1.44585e+08	2					5.44235e+07	1	1.33306e+08	2			5.76866e+07	1											2.11045e+08
expobiome_smorf_02180526			1.1163e+07	1	2.26335e+06	1			3.20547e+07	2	2.35198e+07	2					4.39595e+06	1					6.59712e+06	1	1.12548e+07	1			2.80286e+06	1			2.82312e+07	2							1.22057e+07	2			3.19148e+07	2
expobiome_smorf_02181219			7.42246e+07	3					2.44304e+09	9	2.63484e+09	7	6.92714e+08	5																			2.39318e+08	5											3.72061e+09	9	2.08548e+09	8	3.82725e+08
expobiome_smorf_02182134			3.46286e+07	1					2.30862e+07	1							1.71078e+07	1									1.72948e+07	1					2.36334e+07	1	3.29529e+07	1
expobiome_smorf_02183102			1.19699e+07	1																													2.80378e+07	1
expobiome_smorf_02183235							2.21939e+07	2	1.64796e+07	2			2.2618e+07	2	3.71063e+07	2					1.14667e+07	1											7.37993e+06	1	2.25551e+07	2			2.09503e+07	2	7.24309e+06	1			7.90288e+06	1
expobiome_smorf_02183540					7.3466e+06	1			5.76823e+06	1					2.83553e+06	1					1.95604e+07	2			3.58533e+07	2							6.21064e+07	4			1.16486e+07	2			6.8325e+06	1			1.23599e+07	2	6.00031e+06	1
expobiome_smorf_02184444			3.34037e+07	2																													3.99815e+07	2
expobiome_smorf_02184565																																	1.63804e+07	1							3.34542e+07	1							9.33586e+06
expobiome_smorf_02184582
expobiome_smorf_02184949			4.09564e+07	1									2.89685e+07	1																			2.57036e+07	1	2.8369e+07	1
expobiome_smorf_02184952			5.62426e+07	1									4.35359e+06	1																			1.84913e+07	1											4.59114e+06	1
expobiome_smorf_02184957			1.204e+08	4									2.06465e+07	3																			5.72605e+07	3	2.02755e+07	1									9.62586e+07	3
expobiome_smorf_02185869			1.37102e+08	4			7.28723e+07	2			1.85853e+08	2	9.82239e+07	3	2.34122e+08	5					8.32201e+08	6	3.01687e+08	6			2.21419e+08	4					1.46865e+08	4			2.56524e+07	2			4.38072e+08	6	2.26297e+08	3					7.54288e+08
expobiome_smorf_02186317																					5.06537e+07	1											4.89552e+07	2			1.92493e+07	1							2.30726e+07	1			1.09332e+08
expobiome_smorf_02188809							2.25964e+07	1	3.22443e+07	1	7.1681e+07	1	3.9996e+07	1			1.27689e+07	1			4.9928e+07	1	2.67664e+07	1			7.92801e+07	2	4.29419e+07	1			8.08878e+07	2	3.88837e+07	1	2.42331e+07	1	7.81068e+07	3			9.46879e+07	2	3.20764e+07	1
expobiome_smorf_02189342																																	1.81442e+07	1
expobiome_smorf_02189670			5.52782e+07	2	9.75915e+06	1					7.85503e+07	2											6.00347e+06	1			8.09978e+06	1					1.21261e+07	1							1.01238e+07	1			5.32234e+06	1			1.58669e+07
expobiome_smorf_02190218									2.69579e+07	1	2.59619e+07	1	1.83361e+07	1																	2.49996e+07	1	2.20792e+07	1									1.05648e+07	1			6.34055e+07	3
expobiome_smorf_02190780																																	4.03185e+07	1
expobiome_smorf_02191282			2.68541e+07	1					1.27657e+07	1	1.96497e+08	3									5.67267e+07	1			1.01669e+07	1			2.92631e+07	1			1.24721e+08	3	3.45213e+07	2					2.44957e+08	4	4.19263e+07	1	8.04026e+07	2	4.20446e+08	3	1.47798e+08
expobiome_smorf_02191794															2.48631e+07	1																	1.57459e+07	1													6.7964e+07	1	1.28078e+08
expobiome_smorf_02193608					3.39459e+07	1					3.69995e+07	1					6.61959e+07	2			3.76074e+07	1	2.56603e+07	1	5.53375e+07	1	6.66901e+07	1			1.02628e+08	1	3.19051e+07	1			5.93268e+07	1	4.69835e+07	1	9.09043e+07	1	3.04242e+07	1			5.64432e+07	1	4.58156e+07
expobiome_smorf_02193610									1.46459e+07	1	1.28012e+07	1					1.32092e+08	2	8.91258e+07	1							8.97618e+07	1			6.62195e+07	1	3.93809e+07	1	2.74445e+07	2	1.57074e+08	1			4.1024e+07	1	1.00696e+08	1					4.02718e+07
expobiome_smorf_02193612			7.92848e+07	2					1.74421e+08	2			2.03607e+08	3	8.05674e+07	1			1.94336e+08	3	7.72886e+07	1			7.77075e+07	1	3.09907e+08	3			2.5651e+08	3	3.45284e+07	1	1.61117e+08	3	1.72074e+08	2	1.09492e+08	1	1.00296e+08	2	2.73188e+08	3					1.30074e+08
expobiome_smorf_02193614			4.8138e+07	2			3.15626e+07	1	2.72939e+08	4	3.07375e+07	1	1.91266e+08	4					1.7544e+08	4	8.38837e+07	1	2.24662e+07	1	6.68232e+07	1	5.92018e+07	1			2.12067e+08	2	3.22277e+07	1	8.1504e+07	1	1.12297e+08	1	8.62864e+07	1	9.42812e+07	1	1.04472e+08	1					7.69689e+07
expobiome_smorf_02193615			1.27254e+08	3			4.67852e+07	2	6.22903e+08	5	1.12084e+08	2	4.85674e+08	4	1.06641e+08	1	4.43501e+08	2	3.91743e+08	4	2.1961e+08	2	5.35139e+07	2	1.52084e+08	2	3.48513e+08	2	7.48151e+07	2	5.15677e+08	5	1.32209e+08	3	3.62137e+08	4	3.22014e+08	3	1.83112e+08	2	3.22248e+08	2	4.31983e+08	3	1.59182e+07	1	1.07743e+08	2	1.3389e+08
expobiome_smorf_02195857			7.88807e+06	1					1.25879e+07	1	1.43344e+07	1																					1.32459e+07	1											1.90503e+07	1
expobiome_smorf_02195883			1.0212e+08	2			6.73175e+07	2									1.11867e+08	2					5.48744e+07	2	2.06837e+07	2							4.33851e+07	2											1.50845e+07	1
expobiome_smorf_02197691																	3.3374e+07	1					8.91145e+06	1									7.78043e+06	1	6.55026e+06	1									1.05717e+07	1
expobiome_smorf_02197830																															7.50563e+06	1
expobiome_smorf_02198439									7.38052e+06	1																							1.11233e+07	1
expobiome_smorf_02199023			9.75459e+07	3			8.70316e+06	1			4.54097e+07	1	5.37675e+06	1			9.36359e+07	3					1.52063e+07	1	2.67025e+07	2	1.00167e+07	1			7.78985e+06	1	3.35376e+07	2									9.12593e+06	1	5.45119e+07	2
expobiome_smorf_02199140					8.32018e+06	1			3.40471e+06	1	1.0457e+07	1					2.54012e+07	2			7.64622e+06	1			8.42512e+06	1	1.3807e+07	1					2.92741e+07	2	1.69579e+07	1					2.69868e+07	2
expobiome_smorf_02199205			4.47611e+08	5			9.45822e+07	3	2.37022e+08	4	3.16427e+08	5																					3.18117e+08	5
expobiome_smorf_02200056			1.26811e+08	3			8.03723e+07	2	1.16376e+08	3	7.02665e+07	2	9.29849e+07	2	5.61278e+07	2	1.12307e+09	1	3.05218e+08	3	4.20735e+07	1	1.11448e+07	1	3.89209e+07	2	9.68626e+07	2			3.20092e+08	2	4.89991e+07	2	1.23123e+08	2	2.37024e+08	2			4.12131e+08	3	1.148e+08	2	5.51284e+06	1	2.99067e+07	2	3.25663e+08
expobiome_smorf_02200612																															1.80614e+07	1
expobiome_smorf_02201934																																	4.17392e+06	1
expobiome_smorf_02204414			6.22341e+07	1																											2.09174e+07	1																	2.08995e+07
expobiome_smorf_02204809			5.32848e+07	1					3.78457e+07	1			1.50727e+07	1									2.83931e+07	1					1.87612e+07	1			4.12091e+07	2	1.90386e+07	1					3.06263e+07	1	1.64529e+07	1			1.77441e+07	1
expobiome_smorf_02205403																																	4.94928e+06	1
expobiome_smorf_02205987																																	7.76517e+06	1			1.54531e+07	1	3.82263e+07	1							1.81029e+07	1	4.65389e+07
expobiome_smorf_02206442			1.28671e+08	2									7.64168e+07	2							6.35748e+07	2	2.34203e+07	1									1.1039e+08	2	1.11674e+08	2									1.19416e+08	2
expobiome_smorf_02206494																																	9.00551e+06	1
expobiome_smorf_02207360					1.18216e+07	1			2.45083e+07	1			2.51691e+07	1																			2.90669e+07	1							5.12587e+07	2
expobiome_smorf_02207782					3.22744e+06	1															8.28743e+06	1			5.19795e+06	1							9.12942e+06	1
expobiome_smorf_02208462			8.70123e+06	1							1.7351e+07	1											1.34696e+07	1	4.55119e+06	1	9.16968e+06	1					1.34629e+07	1							7.89629e+06	1			6.43977e+06	1			3.43919e+06
expobiome_smorf_02208601			3.73445e+07	1									1.51888e+07	1							5.27682e+06	1											1.71928e+07	1	1.65388e+07	1									2.21465e+07	1
expobiome_smorf_02208780			5.25205e+07	1					3.77966e+07	1							2.29968e+08	3							1.07843e+08	2							3.45196e+07	2					9.29243e+07	1			1.26376e+08	2
expobiome_smorf_02210803			8.49929e+07	1			3.01796e+08	2																							8.06641e+07	2	7.1209e+07	2
expobiome_smorf_02211097			5.25284e+07	2									3.89914e+07	2																			2.77955e+07	1	1.65206e+07	1									4.53334e+07	2
expobiome_smorf_02211539			1.81327e+08	1	2.08965e+08	1			1.07639e+07	1																	1.41382e+08	1					9.56743e+07	1
expobiome_smorf_02211564			1.20613e+07	1			2.17642e+08	3					1.23565e+08	3													6.56983e+06	1	2.68908e+07	1			4.2668e+07	3					2.86909e+08	3
expobiome_smorf_02211609																																	4.29619e+07	2
expobiome_smorf_02211644																																	3.09056e+08	3
expobiome_smorf_02211915																																	4.94402e+07	2
expobiome_smorf_02212413			6.42739e+07	1			7.64765e+07	2									1.32954e+08	2							6.44112e+07	2							1.64359e+07	1
expobiome_smorf_02212551			8.20199e+07	1			3.12663e+07	1	2.80944e+07	1	2.02911e+08	1	1.65793e+08	1	2.91087e+08	1	1.25309e+08	1					7.91081e+07	1	1.36646e+08	1							2.3472e+07	1											1.35386e+07	1
expobiome_smorf_02212882																	2.25093e+07	1															2.69992e+06	1
expobiome_smorf_02213174																																	2.08345e+07	1
expobiome_smorf_02214890																																											4.2806e+07	1
expobiome_smorf_02215125									2.78481e+07	2	2.03131e+08	4	6.77658e+07	4	8.27001e+07	3	4.12983e+07	3			7.63152e+07	4	6.88593e+06	1			6.71326e+07	2	2.33202e+07	1			5.47233e+07	4	2.17916e+07	1			4.81367e+07	3	3.13637e+07	2	6.1779e+07	3	1.9039e+07	1	2.06716e+08	4	3.08754e+07
expobiome_smorf_02215232			7.18371e+06	1					4.42956e+07	2			4.86793e+07	2																			1.58224e+07	1							8.85051e+06	1
expobiome_smorf_02216018																															2.02575e+07	1
expobiome_smorf_02216075			2.64586e+07	1							3.53227e+07	1																					1.75632e+07	1			1.55196e+07	1							5.29353e+06	1			1.45855e+07
expobiome_smorf_02216429			5.35809e+07	1					1.45613e+07	1	9.97809e+07	3					6.03352e+07	2													5.77625e+07	1	1.13466e+08	2	1.26385e+07	1
expobiome_smorf_02216729			9.07353e+06	1	5.45189e+07	1															2.41289e+07	1			4.0632e+07	1					1.42534e+07	1	5.71277e+07	1					2.63385e+07	1	1.57705e+07	1			1.10784e+07	1	6.03573e+06	1	8.13888e+07
expobiome_smorf_02216770			1.39618e+08	3							3.11217e+08	4					1.32551e+09	7															5.49532e+08	4			1.11538e+08	3							9.48754e+07	2
expobiome_smorf_02217942																																	3.59505e+06	1
expobiome_smorf_02217967																															4.42738e+07	3
expobiome_smorf_02217986			2.61706e+07	1											8.86735e+07	2					1.19439e+08	3									3.37315e+07	1	1.15558e+08	3	5.01632e+07	2			2.07444e+08	5			3.87026e+07	2
expobiome_smorf_02219599																																	4.30289e+06	1
expobiome_smorf_02219764			8.70585e+07	2	3.27444e+07	2	4.15608e+07	2			2.45009e+07	1			1.69884e+07	1							1.12465e+07	1	8.65735e+07	3	5.33427e+07	2					4.22135e+08	5	3.6513e+07	2	5.64754e+07	2	1.12769e+07	1							2.17777e+07	1	1.18495e+07
expobiome_smorf_02220264			6.27338e+06	1																	5.36594e+06	1											5.03874e+06	1			1.02354e+07	1	1.17024e+07	1	7.4886e+06	1	6.52786e+06	1	9.00994e+06	1
expobiome_smorf_02220526			2.0472e+07	1	2.07407e+07	1	7.09034e+07	2	9.97417e+06	1	9.43428e+07	2	5.27423e+07	2	4.33235e+07	1	7.79432e+07	1			4.58323e+07	2	1.16908e+08	2	8.7459e+06	1	7.39826e+07	2					6.09392e+07	1	3.53871e+07	1	7.27093e+07	2	1.07214e+08	2	5.3362e+07	1	1.42872e+08	2	6.82567e+07	1	1.55125e+08	2	1.10636e+08
expobiome_smorf_02220652			6.49136e+07	1			2.15244e+08	1			3.57822e+07	1			3.10955e+08	2					6.64542e+07	1	4.12468e+08	1			5.50238e+08	1	6.2792e+07	2			2.70094e+08	2	1.17254e+08	2			1.70132e+08	1					2.80199e+08	2	3.54619e+08	2
expobiome_smorf_02221530					4.55556e+07	1			5.20724e+07	2			5.30949e+07	1	1.21273e+08	2	5.32547e+07	2			3.88435e+07	1	7.38049e+07	2			5.45493e+07	1	3.07756e+07	1			5.20351e+07	2	4.47332e+07	2			2.17703e+07	1			7.75179e+07	2			1.55404e+08	2
expobiome_smorf_02558818															3.74329e+07	1																	1.11473e+07	1					5.05159e+07	1					1.10763e+07	1	5.70482e+07	1	5.80344e+07
expobiome_smorf_02559520
expobiome_smorf_02561560																																	1.36311e+08	1
expobiome_smorf_02565928							5.01052e+07	1							1.00697e+07	1																	3.62619e+07	2					1.25719e+07	1					1.53885e+07	1
expobiome_smorf_02568003															5.25329e+06	1									1.16681e+07	1					1.00221e+07	1											1.23197e+07	1
expobiome_smorf_02568248																																	1.51088e+07	1															2.23457e+07
expobiome_smorf_02569843																							1.65552e+08	1			6.64919e+07	1					8.84736e+07	1
expobiome_smorf_02575302																																	2.79729e+08	1
expobiome_smorf_02576298																															9.33596e+07	2
expobiome_smorf_02577647					1.10883e+08	2			3.07325e+07	1			1.0945e+08	3																			8.32761e+07	2							6.53147e+08	6	1.6573e+07	1					2.87483e+08
expobiome_smorf_02578441																																	1.99663e+07	2
expobiome_smorf_02581125																																	1.16485e+08	1															1.34853e+08
expobiome_smorf_02582216							4.51219e+07	2	1.75432e+07	2			6.39975e+06	1			6.32288e+07	2															3.52561e+07	2	1.64924e+07	1							6.34856e+06	1			1.22238e+07	1
expobiome_smorf_02583107
expobiome_smorf_02586838																																	9.35326e+06	1							6.38916e+06	1
expobiome_smorf_02588220																																	8.78163e+07	2
expobiome_smorf_02588596																																	2.20285e+08	2
expobiome_smorf_02589409																									5.58297e+07	1							1.51753e+07	1
expobiome_smorf_02590415																																	1.37938e+07	1
expobiome_smorf_02590504
expobiome_smorf_02592517
expobiome_smorf_02600567					3.38864e+07	2	8.89736e+07	4									2.15355e+07	2					9.17342e+06	1							1.85358e+07	2	1.83353e+07	1							1.27889e+07	1	5.60466e+06	1			1.92333e+07	2
expobiome_smorf_02601301																																	7.28239e+06	1
expobiome_smorf_02602303																																	2.1174e+07	1															2.39314e+07
expobiome_smorf_02611180																																	1.10772e+07	1											2.54142e+07	2
expobiome_smorf_02611243															5.66805e+06	1			1.74773e+07	1															1.22154e+08	1					1.96838e+07	1
expobiome_smorf_02613689																																	3.21021e+07	1
expobiome_smorf_02616262					7.39535e+06	1			2.62822e+07	2					1.24918e+07	1									9.97131e+06	1	6.3505e+06	1					4.06863e+07	3									1.18277e+07	1	1.41264e+07	1			4.01497e+07
expobiome_smorf_02618921																																	4.24335e+07	3
expobiome_smorf_02646451																																	1.58626e+07	1
expobiome_smorf_02662321																															1.1235e+08	2
expobiome_smorf_02683907																																	6.74013e+06	1
expobiome_smorf_02820339																							2.23114e+07	1							2.05447e+07	1	1.61984e+07	1
expobiome_smorf_02820627													5.30053e+07	1																			5.43804e+07	1
expobiome_smorf_02820939																																	1.37761e+07	1
expobiome_smorf_02821046	2.63788e+07	1							2.34242e+07	1	4.74671e+07	1	3.40278e+07	1	1.45568e+07	1	1.34663e+08	3	1.16401e+07	1	2.03688e+07	1	2.5444e+07	1			1.61865e+07	1	2.2781e+07	1	5.10764e+07	2	3.56648e+07	1	1.43657e+07	1	6.61207e+07	3	4.18422e+07	1	4.05845e+07	1	1.39537e+07	1	1.08862e+07	1	8.20833e+06	1	3.55517e+07
expobiome_smorf_02821047															2.16465e+07	1															1.0494e+08	3			4.2225e+07	1	3.43237e+07	1											1.5568e+08
expobiome_smorf_02821358	1.35967e+08	2					1.03938e+08	2	2.27467e+07	1			7.38386e+07	2							2.83895e+07	1					7.76568e+07	2					2.2327e+07	1									2.8954e+07	2
expobiome_smorf_02821404			4.04747e+07	1			5.793e+07	2					1.65937e+07	1	1.13638e+07	1	5.59493e+06	1					4.9673e+07	2	6.57376e+06	1	1.6135e+07	1	4.60943e+07	1			1.21123e+07	1							1.7506e+07	1	3.80436e+07	2	2.98518e+07	1	7.00418e+07	2	1.19806e+07
expobiome_smorf_02821459							4.81685e+07	1	1.14789e+08	2					3.26567e+07	1	7.23632e+07	1					3.39643e+07	1									1.76782e+08	3	8.66215e+07	1
expobiome_smorf_02821463																																	7.90442e+06	1											6.43853e+06	1
expobiome_smorf_02821610	4.22181e+07	2					1.5768e+08	6			1.58746e+08	3					7.5304e+07	3									3.58996e+07	2			3.14473e+07	2	4.89483e+07	3	3.34118e+07	2					1.12944e+08	4	5.1544e+07	4	1.35237e+08	4	5.05044e+07	2
expobiome_smorf_02821637	2.96195e+07	1	3.11191e+07	1																					3.67376e+07	1					2.92228e+07	1	3.34879e+07	1
expobiome_smorf_02821721	2.30973e+08	3	2.6494e+08	3	4.75805e+07	2	5.32994e+07	2	1.83853e+08	4	5.72364e+08	5	3.55938e+08	3			7.73076e+08	4	1.8496e+07	1	1.7186e+08	3	1.99819e+08	3	8.90795e+07	3	1.53318e+08	3					4.77809e+08	4	1.8038e+08	4	5.03948e+07	2			2.15115e+08	3	2.31619e+08	3	3.95268e+08	5			1.03224e+08
expobiome_smorf_02821739			1.67105e+08	2	2.43972e+08	2	1.20656e+08	2	2.86932e+08	2	4.10803e+08	2	1.04332e+08	2					1.83856e+08	2	2.58398e+07	1	3.84727e+08	2	5.34178e+07	2			1.56218e+08	2			1.16777e+08	2	6.00692e+07	2	1.30475e+08	2	2.46979e+08	2	2.13409e+08	2	4.08434e+07	2	1.55099e+08	2	4.77015e+07	2	1.37438e+08
expobiome_smorf_02821742	5.69918e+07	1							6.94056e+07	1			4.02367e+07	1			1.03781e+08	1					1.22825e+08	1	1.64906e+07	1	6.43365e+07	1	5.5178e+07	1	2.51817e+07	1	4.56259e+07	1			4.95473e+07	1			8.45872e+07	1			6.31206e+07	1	3.3402e+07	1
expobiome_smorf_02821764									1.60056e+07	1																	8.85107e+06	1					2.04068e+07	1	1.6689e+07	1					1.08425e+07	1
expobiome_smorf_02821786																															9.55238e+07	1	2.67203e+08	3									2.91112e+08	3
expobiome_smorf_02822061	1.94203e+07	1	2.32488e+07	1					4.86206e+07	1			6.29479e+06	1			9.2888e+07	1	4.37971e+07	1			8.62516e+07	1					2.63109e+07	1	1.52773e+07	1	1.04373e+07	1							7.87214e+07	2	8.97354e+06	1	2.63664e+07	1	4.14877e+06	1
expobiome_smorf_02822101			5.79934e+06	1											9.68419e+06	1					5.80665e+07	1			2.84408e+07	1					3.09346e+07	1	4.36927e+07	1			7.26515e+06	1	2.78225e+07	1									6.2057e+07
expobiome_smorf_02822130													2.60183e+07	1			2.02266e+07	1															4.67723e+07	2			4.73817e+07	1	1.63814e+07	1									1.50924e+07
expobiome_smorf_02822564	3.08469e+07	1					2.02716e+08	3			1.40349e+08	1	2.1497e+08	3					1.83982e+07	1			6.48525e+07	1	1.16678e+08	1	1.79955e+07	1			2.79477e+07	1	1.3506e+08	1	2.45997e+07	1	4.18814e+08	3			8.37891e+07	2	3.07999e+07	1					4.86848e+07
expobiome_smorf_02822614									1.40749e+07	1											1.22954e+07	1											1.95877e+07	1											1.31952e+07	1
expobiome_smorf_02822675			6.37793e+07	2	7.37287e+07	2			2.81443e+07	1			9.28372e+06	1	1.67605e+07	1					2.86328e+07	1	2.90754e+07	2									2.85876e+07	1	2.95943e+07	1							2.33127e+07	1	1.53367e+07	1
expobiome_smorf_02823063			2.65166e+08	1					3.07042e+07	1	6.6655e+07	1							1.19004e+07	1											6.53851e+07	1			9.43742e+07	1							6.766e+07	1	3.28738e+07	1	1.79905e+07	1	4.60057e+07
expobiome_smorf_02823389	3.22781e+08	1	1.91109e+08	1			1.55065e+08	1	5.21567e+08	1			2.23408e+08	1			4.68029e+08	1	1.58977e+08	2					4.31915e+08	2					2.48028e+08	2	6.86888e+07	1	2.65465e+08	1			4.9214e+08	3	9.47577e+07	1	1.27809e+08	1			1.1975e+08	1	1.25688e+08
expobiome_smorf_02823546																																	1.48183e+07	1
expobiome_smorf_02824049					1.12174e+07	1																											1.1139e+07	1	1.03245e+07	1									1.42859e+07	1			6.46574e+06
expobiome_smorf_02824640			5.70934e+08	2					6.33e+07	2																			2.60335e+07	2	2.22013e+08	2			1.65911e+08	2					2.0898e+08	2	3.84296e+07	2	6.21689e+07	2			1.79444e+08
expobiome_smorf_02824986	2.14791e+08	3	3.35982e+08	2			9.96625e+07	2			1.27379e+08	3					6.21091e+08	4					3.82809e+07	1			3.70897e+08	4			5.00532e+08	4	5.48697e+08	2	1.54309e+08	2	2.11958e+08	4	5.10973e+08	2	1.85698e+08	3					3.62957e+07	1
expobiome_smorf_02825086
expobiome_smorf_02825150	7.18334e+07	2	6.4146e+07	2							3.18387e+07	1			1.46701e+07	1											2.33096e+07	1					3.27053e+07	2									2.34436e+07	2
expobiome_smorf_02825294																																	4.6377e+06	1
expobiome_smorf_02825400			3.10584e+08	2	8.26651e+07	2	2.73597e+07	1	2.39268e+07	1	1.24708e+08	2									6.70969e+07	2	5.50062e+07	2			6.91127e+07	2			2.17508e+07	1	4.90336e+08	2	1.04269e+08	2	7.5006e+07	2	7.91707e+07	2			3.20014e+07	2	3.91832e+07	2			9.774e+07
expobiome_smorf_02825489																																	2.12374e+07	1													8.99704e+06	1
expobiome_smorf_02825723
expobiome_smorf_02825795	1.7514e+08	2	5.00838e+07	1					2.34246e+07	1	2.83998e+08	3	2.3717e+07	1	1.69123e+07	1	2.87673e+08	4			2.46011e+07	1	7.17148e+07	1			1.92998e+08	2			5.20543e+07	1			5.57952e+07	1	3.67698e+07	1	1.90428e+08	2					4.09916e+07	1	6.04643e+07	1
expobiome_smorf_02825796									2.53042e+07	1	1.00489e+08	2			1.13987e+07	1	1.87042e+08	3	3.47051e+07	1			1.40946e+08	2	5.78449e+07	2					1.00605e+08	1	1.31091e+08	2							2.32639e+07	1			2.53556e+07	1	4.04106e+07	1	4.04198e+07
expobiome_smorf_02826134																	4.18446e+08	4															3.73089e+07	1
expobiome_smorf_02826165							1.80381e+07	1			1.90086e+07	1	1.0196e+07	1			4.21655e+07	1															1.84902e+07	1	1.2702e+07	1					1.37525e+07	1			7.43381e+06	1
expobiome_smorf_02826399			6.8845e+06	1	9.96379e+06	1			1.86244e+07	1	1.07936e+07	1	5.40962e+06	1									2.67131e+07	2			1.8872e+07	1					2.93086e+07	1	1.0691e+07	1					1.29405e+07	1			1.68297e+07	1	4.41328e+06	1
expobiome_smorf_02826403																					2.25465e+07	1	6.00085e+07	1							2.1142e+07	1	5.30263e+07	1	1.09981e+07	1							3.70072e+07	1	2.29097e+07	1
expobiome_smorf_02826414			1.75941e+07	1																													6.0161e+06	1
expobiome_smorf_02826949	8.97775e+07	1									4.68345e+07	2											6.96956e+07	2									3.74478e+07	1
expobiome_smorf_02826974					7.963e+07	2			4.19158e+07	2	6.22363e+07	2											4.76186e+08	5	1.05206e+08	3					1.79233e+07	2	2.1263e+08	5							8.92815e+07	3	2.22095e+08	3
expobiome_smorf_02827431	3.32552e+07	1							3.60443e+07	1			2.29283e+07	1			6.74876e+07	1													2.94355e+07	1	6.8708e+07	1
expobiome_smorf_02827525	3.11219e+07	1							1.50394e+08	2							1.36041e+07	1			3.09905e+07	1					1.85667e+07	2					2.09728e+07	1
expobiome_smorf_02827837			4.44724e+07	1	5.21116e+07	1	3.57442e+07	1					2.33329e+07	1					8.17948e+06	1					2.62103e+07	1	5.26665e+07	1					1.46751e+07	1			2.48716e+07	1	4.51687e+07	1	2.56194e+07	1	2.19984e+07	1
expobiome_smorf_02827967			2.43394e+08	2	1.09188e+07	1	3.83881e+07	1	4.67611e+08	2	1.98641e+08	1	5.08363e+08	2	1.05107e+08	1	4.63571e+08	2			1.98713e+08	1	1.1275e+08	1	6.57013e+07	1	1.77785e+08	2			5.79966e+07	1	6.97966e+08	2	1.66224e+08	1	1.97982e+07	1	1.3063e+07	1	1.60691e+08	1	2.67351e+08	2	5.71072e+08	2
expobiome_smorf_02827968	9.97855e+07	3	4.52643e+08	4	2.43204e+07	2	6.28607e+07	3	5.75989e+07	3	1.35759e+08	3	2.15146e+08	4					7.07081e+06	1	9.36885e+07	2	6.42007e+07	2	4.49006e+07	1	5.74802e+07	2			2.36352e+07	1	2.87477e+08	4	6.88199e+07	4	6.80714e+07	2	8.8144e+07	3	5.58355e+08	4	4.7521e+07	2	2.40717e+08	3	3.48919e+07	2	2.07682e+08
expobiome_smorf_02827972			4.12704e+08	3					4.38416e+08	3											3.31275e+08	3	1.08588e+08	3							5.43605e+07	3	1.80927e+08	3	7.44842e+07	3			9.55626e+06	1	1.08083e+08	2	8.95227e+07	1	1.64357e+08	4
expobiome_smorf_02827973			1.90135e+08	1							3.732e+07	2	4.18616e+07	1			2.37747e+08	1			5.68836e+07	1	2.72116e+07	1	2.47583e+07	1					8.67356e+06	1	1.13996e+08	3	1.49716e+07	1	4.37821e+07	2			1.05799e+08	2			6.62322e+07	1			3.55554e+07
expobiome_smorf_02828216	1.4916e+07	2																															9.46536e+06	1
expobiome_smorf_02828302			2.91139e+07	2							4.9462e+06	1	9.92071e+06	1			3.24858e+07	2	8.85039e+06	1											6.60769e+07	3	6.00364e+06	1	4.01415e+06	1							5.84994e+06	1
expobiome_smorf_02828447			7.25625e+06	1	2.43205e+08	3	4.12166e+08	3							5.72482e+08	4			1.743e+08	3	7.37417e+08	4			6.18899e+07	2	6.85397e+06	1	8.05459e+07	2	5.45537e+08	4	1.72913e+07	1			4.25114e+08	3	2.75369e+08	3	7.39678e+08	4	1.53334e+08	3	1.56876e+08	3	5.91821e+06	1	5.95171e+08
expobiome_smorf_02828790																																	1.69488e+07	1
expobiome_smorf_02828911			2.31909e+08	1					1.12527e+08	1	1.05226e+08	1	1.4698e+08	1																	3.40054e+07	1			1.5162e+08	1							9.76591e+07	1
expobiome_smorf_02829006	1.04807e+08	2	1.84112e+08	2							2.59983e+07	1			1.38515e+08	2	3.68427e+07	1	8.74516e+06	1	1.54651e+07	1					3.14988e+07	1					1.87039e+07	1							1.052e+07	1	9.23668e+07	2	2.41834e+07	1	5.37231e+07	1	1.94658e+08
expobiome_smorf_02829007			2.2084e+07	1			3.00695e+07	1	4.60946e+07	1	6.27283e+07	1					7.01349e+07	3	1.1786e+07	1	2.45115e+07	1	6.43064e+07	1	9.53281e+07	2	3.07007e+07	1					3.74104e+07	1	4.04961e+07	1			4.41888e+07	2	2.92659e+07	1	7.64061e+06	1	7.36021e+07	1			5.65023e+07
expobiome_smorf_02829093																																	3.97041e+07	1							8.53353e+07	1
expobiome_smorf_02829171			2.4143e+08	2					8.14475e+06	1			7.0639e+07	1			3.96688e+08	1					7.73267e+07	1									1.23899e+08	1											8.04662e+07	1
expobiome_smorf_02829431			4.29945e+07	1	3.462e+07	1	1.48047e+08	3					1.40708e+08	3	2.79379e+07	1									1.59062e+07	1			7.46114e+07	2	4.30137e+07	1	1.3368e+08	4			1.70722e+07	1	2.45055e+08	4							1.68835e+07	1
expobiome_smorf_02829460									2.0479e+07	1							1.30734e+08	2															2.63377e+08	3	1.22728e+08	1	4.63017e+07	1							1.14819e+08	1
expobiome_smorf_02829734																			5.17677e+06	1													1.22487e+07	1							3.77025e+06	1
expobiome_smorf_02829920					2.32929e+07	1											4.15037e+06	1			3.88664e+07	1	1.70151e+07	1	2.94677e+07	1					3.0718e+07	2			6.60184e+06	1							2.02193e+07	1
expobiome_smorf_02829927																																	1.17496e+07	1											1.17204e+07	1
expobiome_smorf_02829929	4.93524e+07	2	1.57992e+07	1					2.75281e+07	1	3.38437e+07	1	4.91182e+07	1	1.82549e+07	1	1.26343e+08	2	1.52439e+07	1					1.95206e+07	1	2.20276e+07	1					9.42975e+07	2	3.39063e+07	1					4.70464e+07	1	1.87327e+07	1	5.77109e+07	1
expobiome_smorf_02830184			3.8892e+08	2			3.22953e+07	1	6.54075e+07	2	5.32083e+08	2	3.69653e+08	2	3.45869e+08	2	4.34298e+08	2	9.66291e+06	1	7.66568e+07	2	3.54384e+08	4	2.39892e+08	2	6.59109e+08	4	6.10989e+07	3	1.89452e+08	2	5.97803e+07	2	7.7371e+08	2	2.5288e+08	2	7.6684e+08	2	3.08768e+08	2	5.06318e+08	2	1.32237e+07	1	2.13013e+07	1	7.12016e+07
expobiome_smorf_02830361																							5.54614e+06	1							3.26947e+07	1	5.84932e+06	1									2.57738e+07	1
expobiome_smorf_02830539																																	2.65275e+07	1
expobiome_smorf_02830925	1.55104e+08	2	3.79139e+08	1			1.04007e+08	2			3.22794e+08	2					1.7883e+07	1			3.07701e+08	1	3.52804e+08	1	1.64106e+08	1	5.81372e+08	2			3.62638e+08	1	4.91121e+08	2			1.36964e+08	2	4.51565e+08	2	2.50938e+08	2			4.25531e+07	2	1.52827e+08	1
expobiome_smorf_02831006	9.61395e+07	1	2.56335e+08	3	1.38497e+07	1	1.05465e+08	2	2.91362e+08	2	3.55195e+08	3			2.5553e+08	2	2.87356e+08	2	4.01239e+07	1	2.56504e+08	4	5.77797e+08	4	6.47682e+08	4	2.02848e+08	2	3.10028e+07	1	3.25591e+08	3	3.49368e+08	3	2.05123e+08	2	4.35915e+07	1	5.45652e+07	2	5.29247e+07	1	5.09344e+07	1	2.41979e+08	2	3.1978e+08	4	2.37707e+08
expobiome_smorf_02831129																					1.42092e+07	1			1.60155e+08	2							4.25302e+08	7	2.36193e+08	2									1.25236e+08	3	8.1585e+07	2
expobiome_smorf_02831151			1.60449e+08	2									2.1701e+07	1							4.88672e+07	1	4.49807e+07	1							2.45e+07	1	1.41207e+08	2	3.75381e+07	1					2.84256e+07	1			3.19959e+07	1
expobiome_smorf_02831768																																	1.86595e+07	1	3.50518e+07	1
expobiome_smorf_02831780	1.01344e+08	2											2.01144e+07	1			1.82606e+08	2	1.77184e+08	2			4.94027e+07	2			1.56595e+08	2			1.0282e+08	2					1.27727e+08	2	4.99483e+07	1	1.53781e+08	3	2.19593e+07	1	1.21166e+08	2			1.49966e+08
expobiome_smorf_02831818			5.50317e+07	2							1.20521e+07	1											2.13063e+07	2									8.45655e+07	2
expobiome_smorf_02831834																					2.13608e+07	1											1.96681e+07	1
expobiome_smorf_02831846																																	3.19548e+07	3
expobiome_smorf_02831847																																	8.98734e+06	1
expobiome_smorf_02832163	2.36609e+07	2							3.23026e+07	2	9.2999e+07	2	6.12063e+07	2			6.25497e+06	1					6.74375e+06	1			1.68392e+07	2			7.1651e+07	2	2.23595e+07	2	4.96295e+06	1					4.92642e+06	1	7.03297e+07	2
expobiome_smorf_02832297	9.50251e+06	1					4.13181e+07	1	1.62224e+08	2					1.87507e+07	2	1.31288e+08	2					1.03051e+08	1	1.86632e+07	2					8.92686e+06	1	2.08014e+08	3									2.49686e+07	2
expobiome_smorf_02832402	6.46795e+07	1	9.36383e+07	2			5.51096e+07	2			5.82474e+07	2			1.36509e+08	2					3.23796e+07	2			1.64174e+08	3	9.55366e+07	1					2.73633e+07	2	1.25308e+08	3			2.27712e+08	3			1.30437e+08	2	3.75312e+07	2	1.08257e+08	3
expobiome_smorf_02832408	2.15963e+08	4	3.19082e+08	4			1.25028e+09	6			6.94569e+08	7			4.95027e+07	2			3.45797e+07	2	3.35638e+07	1			1.02466e+08	3	2.41178e+08	4					1.09243e+08	3	1.22636e+08	4			3.30488e+08	5			1.25308e+08	3	8.37397e+07	2	3.83614e+07	2
expobiome_smorf_02832419	2.38885e+08	1	2.70736e+08	2			4.02008e+08	1			4.60246e+08	1			1.13458e+07	1			3.64784e+07	1	1.70022e+08	1			2.81419e+08	1	4.13381e+08	1					2.50705e+08	1	2.85181e+08	1			5.92502e+08	2			4.07508e+08	1	3.55167e+08	3	1.49712e+08	1	4.09656e+08
expobiome_smorf_02832423	5.77275e+06	1	3.50995e+06	1			4.54485e+06	1																	2.97321e+07	1							8.8759e+06	1					1.42697e+08	2			3.02757e+07	2	2.384e+07	2			8.52731e+07
expobiome_smorf_02832445							4.58697e+07	1			4.35728e+06	1	6.17969e+07	2																			2.75259e+08	4					1.48589e+08	4							1.08701e+07	1	7.60517e+07
expobiome_smorf_02832446																																	2.22757e+07	1
expobiome_smorf_02832448			1.65204e+08	2	3.58006e+07	1	4.12145e+07	1			6.20237e+07	2	6.34035e+07	3							2.90971e+07	1	4.1486e+06	1	8.32428e+07	2	3.60471e+07	2	2.14077e+07	1			3.31827e+08	2	7.95222e+07	3	9.4519e+07	4	6.50806e+07	1	1.02865e+08	2			1.8426e+07	1	1.04209e+07	1	5.02237e+07
expobiome_smorf_02832788			2.34109e+08	2													5.07819e+07	2							1.1921e+07	1	5.00087e+07	2			1.92937e+07	2	3.20077e+07	2					6.77394e+06	1			3.07025e+07	2	2.43874e+07	2
expobiome_smorf_02833382																																	2.45611e+07	1	1.88261e+07	1
expobiome_smorf_02833463																											1.83345e+07	1					3.34505e+07	1					7.43972e+06	1
expobiome_smorf_02834003							1.47024e+07	1					2.74006e+07	1											3.06515e+07	1							1.10143e+08	1
expobiome_smorf_02834045							2.32807e+08	3	8.1725e+07	2	1.0505e+08	2			5.60018e+07	2	1.23729e+08	2	8.63444e+07	2	9.0869e+06	1	7.70072e+07	1			1.19018e+08	1	1.94231e+07	2	5.09624e+07	1	5.60179e+07	1	8.90099e+07	1			8.30762e+07	2	1.31584e+08	2	9.80306e+07	1	4.4201e+07	1	1.12531e+08	1	1.4491e+08
expobiome_smorf_02834207									3.60061e+07	1	1.77491e+07	1			1.90384e+07	1	4.08577e+07	2	2.50337e+07	1	1.47898e+07	1					5.42426e+07	2					3.23171e+07	2	9.38052e+07	3							2.43031e+07	1
expobiome_smorf_02834395									8.78023e+06	1																					6.41031e+07	1	6.61945e+07	1
expobiome_smorf_02834509																															1.86372e+08	5
expobiome_smorf_02834547																																	1.37853e+07	1
expobiome_smorf_02834690
expobiome_smorf_02834734			2.42223e+07	1	2.86055e+07	1									4.91234e+06	1							3.68224e+07	1			1.69047e+07	1					5.16271e+07	1	3.81057e+07	1			4.15818e+07	2			1.30101e+07	1	1.27889e+08	2			1.08258e+07
expobiome_smorf_02834805			3.01056e+07	1	1.22935e+07	1					3.3393e+08	5	1.47052e+08	3			5.73713e+07	2					6.67308e+07	2	7.59453e+07	2	3.76136e+07	2			4.23742e+07	2	1.39471e+07	1	5.85573e+08	6	1.78719e+08	3	6.839e+08	9	2.87749e+08	4	2.25796e+07	1	8.02368e+06	1
expobiome_smorf_02834941
expobiome_smorf_02835056			3.9074e+07	2																											2.66837e+07	2	5.89099e+06	1	1.01589e+07	1
expobiome_smorf_02835184																									6.201e+06	1							9.83555e+06	1	5.53563e+06	1									4.1939e+06	1
expobiome_smorf_02835186	3.64753e+08	2	5.48055e+08	4	3.17541e+08	1	2.17281e+08	1	3.83101e+08	2	3.28379e+08	2	4.47776e+08	1	5.11188e+08	2							3.07713e+08	1	4.45474e+08	3	3.242e+08	2			1.7072e+08	4	1.1059e+09	3	3.90706e+08	4					5.23407e+08	5			3.20959e+08	1	3.05054e+08	1
expobiome_smorf_02835201			5.1571e+07	2																			9.2127e+06	1	1.38532e+08	2					6.03691e+07	2	3.83784e+07	2
expobiome_smorf_02835271	1.91727e+07	1	6.34167e+06	1	1.34034e+07	1	1.42769e+07	1	4.88527e+06	1			4.58211e+06	1							1.92789e+07	1	2.20772e+07	1	7.48676e+06	1	2.37785e+07	1					5.05227e+06	1	1.73894e+07	1	7.58773e+06	1	3.48339e+06	1			1.75049e+07	1	9.98421e+06	1	1.7359e+07	1	5.7873e+06
expobiome_smorf_02835273							7.77653e+07	2	1.28118e+07	1	1.7113e+07	1	9.66997e+07	3													4.2721e+07	2					3.80374e+07	2	7.43201e+07	2									7.74392e+07	3			5.62378e+07
expobiome_smorf_02835355					9.58593e+07	1															6.68358e+06	1											2.90694e+06	1					1.61275e+07	1
expobiome_smorf_02835391							3.53645e+07	1			6.78633e+07	1					3.67715e+08	3									7.18383e+06	1					2.70344e+07	2	9.08683e+06	1	1.47376e+07	1
expobiome_smorf_02835392																	2.76604e+07	1															9.13788e+06	1			8.34499e+06	1
expobiome_smorf_02835567	1.19488e+07	1	2.91351e+07	2							2.30214e+07	2					8.40837e+06	1					1.09549e+07	1	1.68895e+07	1	1.08969e+07	1	9.43449e+06	1	1.84807e+07	1	2.21739e+07	1	1.50711e+07	1	1.49896e+07	1	2.10091e+07	1							2.22856e+07	1
expobiome_smorf_02835709																																	1.61508e+07	1
expobiome_smorf_02835717	1.30087e+08	2			1.19068e+07	1	2.46439e+07	1			7.19591e+08	6	4.14351e+08	4	3.2594e+07	1			1.39473e+07	1	8.44041e+06	1	1.73436e+07	1	3.06861e+07	1					6.33779e+08	6	1.14347e+08	2							1.82295e+08	3	5.90043e+08	5	1.53859e+08	3
expobiome_smorf_02835772																																	6.2764e+06	1
expobiome_smorf_02836445	1.74647e+07	1											1.87256e+07	1																	2.18065e+07	1	1.88114e+07	1									3.8324e+07	1	1.2517e+07	1
expobiome_smorf_02836639	1.99371e+07	1	1.70671e+07	1			6.99633e+07	2			1.73341e+08	3			8.80227e+07	2			1.00163e+07	1	1.68379e+07	1			8.64446e+07	2	1.54117e+08	2					1.84228e+07	1	6.64773e+07	2			3.57006e+08	3			9.23291e+07	1	6.81779e+07	2	6.97331e+07	2	2.21268e+08
expobiome_smorf_02836641	1.97277e+07	1	2.78807e+07	1			2.67986e+07	1													2.63855e+07	1			2.36969e+07	1							1.99919e+07	1	3.72608e+07	1			1.02227e+08	1			4.5885e+07	1			6.04771e+07	1	5.03763e+07
expobiome_smorf_02836767																																	7.55968e+06	1
expobiome_smorf_02837045																																	2.12706e+08	4											1.54951e+08	3
expobiome_smorf_02837053			3.23474e+06	1	1.0211e+08	2	1.41107e+08	4							1.90202e+07	1			2.62933e+07	2	2.26206e+08	3			9.24001e+06	1			8.4054e+06	1	3.24269e+08	3	2.20685e+07	2	3.19735e+06	1	9.67712e+07	2	6.11739e+07	3	5.06554e+08	4	3.42202e+07	3	5.47624e+07	2			1.80931e+08
expobiome_smorf_02837125	1.93497e+07	1															8.01174e+07	1	5.00031e+07	1													4.13059e+07	1			7.44763e+07	1
expobiome_smorf_02837193	2.14166e+07	1									2.77179e+07	2	5.13454e+07	3	1.30732e+07	1	2.37573e+07	1			6.73622e+06	1	5.15892e+06	1			5.69779e+06	1			4.49238e+07	3	3.85626e+07	3	1.72385e+06	1	3.25022e+07	1	1.85811e+07	3					2.90846e+06	1	5.8147e+06	1	1.76316e+07
expobiome_smorf_02837614	4.74205e+08	1					4.8508e+08	2																	1.23995e+08	1					3.87058e+08	2	5.73147e+08	2			2.2999e+08	1							1.01001e+09	2
expobiome_smorf_02837622																																	8.11851e+06	1	7.38943e+06	1
expobiome_smorf_02837746			1.17961e+07	1					1.06079e+07	1									1.39243e+07	1													1.13775e+07	1
expobiome_smorf_02837785			4.12512e+07	1							1.0173e+08	1															4.67305e+06	1					5.33388e+07	1							6.65951e+07	1
expobiome_smorf_02837902																																	2.79803e+06	1
expobiome_smorf_02837905			8.72e+08	2							3.34939e+08	1	4.66502e+08	2							4.23727e+08	2	3.91263e+07	1	5.63572e+08	2			6.74181e+07	1	5.2609e+08	1	7.63187e+08	2	8.88372e+06	1			3.93514e+08	2	2.62533e+08	2	2.87934e+08	2	6.20222e+08	1	2.40967e+07	1	1.33416e+08
expobiome_smorf_02837909							1.27763e+07	1																																									1.45381e+07
expobiome_smorf_02837910	3.76066e+08	1	2.31546e+08	1	3.56758e+07	1			1.93166e+08	1	1.01244e+08	2	1.66529e+08	1	9.66716e+07	1	2.22234e+08	2	8.14901e+07	1	1.21955e+08	1	2.07008e+08	1	1.36764e+08	1	8.62363e+07	1			1.90516e+08	1	2.58515e+08	1	1.53429e+08	1			2.88279e+08	2	2.99789e+07	1	1.99436e+08	1	1.63311e+08	1	5.24656e+07	1	2.6616e+07
expobiome_smorf_02838230	3.24847e+07	1	5.04111e+07	1					6.89391e+07	2	2.41012e+07	1			2.63e+07	1	1.55734e+07	1					9.0718e+07	2	9.0503e+07	2	3.54812e+07	1			1.67122e+07	1	2.83452e+07	1	3.66664e+07	1	3.35395e+07	1	3.36811e+07	1	2.52004e+07	1	3.35136e+07	1	6.26554e+07	2	3.21297e+07	1	2.93535e+07
expobiome_smorf_02838352			3.53269e+07	1							8.92433e+06	1	1.43842e+07	1							1.87117e+07	1			1.92921e+07	1	2.87631e+07	1					9.6429e+07	2	1.42912e+07	1	1.55667e+07	1	2.016e+07	1	1.44661e+07	1							1.66586e+07
expobiome_smorf_02838427					2.93112e+07	1	1.38165e+07	1													3.34987e+07	1			2.19413e+07	1					2.97914e+07	1	7.51331e+07	1			1.50318e+07	1	1.90394e+07	1					1.95598e+07	1			1.22194e+08
expobiome_smorf_02838434	2.73049e+08	2																															4.16399e+07	1
expobiome_smorf_02838441																																	1.42914e+07	1
expobiome_smorf_02838687																															1.98868e+08	4
expobiome_smorf_02838737			4.70453e+08	5			1.49096e+07	1	2.40735e+08	3											1.56865e+08	3	9.12508e+07	2							4.20111e+07	1	6.37872e+08	5	2.65149e+07	1					5.4574e+07	1	6.81976e+07	3	2.33938e+08	4			2.93173e+07
expobiome_smorf_02838742																					1.62851e+07	1											4.04643e+07	2											2.90683e+07	1
expobiome_smorf_02838871									7.91357e+07	1	9.77862e+07	1																			4.47327e+07	1	1.26736e+08	1											1.37661e+08	1
expobiome_smorf_02838934																													1.77447e+08	1	5.76042e+07	1	9.46216e+07	2					3.88347e+08	3
expobiome_smorf_02838959	3.27431e+07	1					1.30261e+07	1															1.51449e+07	1									1.37846e+07	1			3.36087e+07	2							4.4261e+07	1
expobiome_smorf_02839019															5.5125e+07	1																	3.0023e+07	1					3.26395e+07	1	3.83979e+07	1
expobiome_smorf_02839582	9.39978e+07	3			2.22928e+08	3			1.53902e+08	3	2.06524e+08	3			8.96381e+07	3			1.09768e+08	2	3.05306e+07	1	2.14249e+08	3	6.96244e+06	1			5.2514e+07	2			4.23429e+07	2	2.22386e+07	1			7.08959e+07	3	1.55137e+08	3							7.85315e+07
expobiome_smorf_02839583	5.38319e+06	1			6.89277e+06	1			2.52476e+07	2							2.16408e+07	1															7.78436e+06	1							1.55463e+07	1			8.41497e+06	1
expobiome_smorf_02839649																																	2.75998e+07	3
expobiome_smorf_02839680			2.47325e+07	1							3.15996e+07	1			1.41681e+07	1									1.845e+07	1	4.19956e+07	1					2.79443e+07	1	1.76128e+07	1			3.43581e+07	1
expobiome_smorf_02839715			6.11126e+06	1			1.49709e+07	1	9.12701e+06	1	1.04964e+07	1	5.81023e+06	1	4.84975e+06	1	3.74303e+07	2	7.03786e+06	1	3.28153e+06	1					8.71236e+06	1			7.43292e+06	1	6.73472e+06	1	1.21961e+07	1			5.85417e+06	1			1.04053e+07	1			2.89248e+07	1
expobiome_smorf_02839903	3.24423e+07	2	3.41941e+07	1			5.64893e+07	3			1.57382e+07	2	6.93466e+06	1	7.44158e+06	1									3.34359e+06	1	2.39037e+07	1					1.07112e+07	1	2.09363e+07	1					1.18013e+07	1			3.92696e+07	3			4.53412e+07
expobiome_smorf_02840006	8.30454e+07	1									1.69366e+08	2	8.43834e+07	1			1.08144e+08	1	8.32133e+06	1													1.77274e+08	2	2.76518e+07	1	1.81372e+08	1	3.1331e+07	1	1.19909e+08	2			1.44723e+07	1
expobiome_smorf_02840008	2.59423e+08	4	2.88947e+07	2			2.17423e+08	4	2.88827e+07	2	5.13399e+08	5	2.63189e+08	3	6.46339e+07	3	3.68432e+08	4	1.06323e+08	3	1.15734e+08	3	9.14272e+07	3	2.56611e+07	2	2.98037e+07	2			8.66214e+07	3	3.76079e+08	4	1.46242e+08	4	1.75339e+08	3	3.57989e+07	2	1.37339e+08	3	1.59046e+08	3	1.69597e+08	3			8.51595e+07
expobiome_smorf_02840199	9.83161e+06	1	3.31569e+08	3					1.55787e+08	2					1.35623e+08	2	5.50793e+08	4	4.85436e+07	1									3.24621e+07	1	2.43387e+08	3	3.00003e+08	3			1.14096e+08	2							5.01914e+08	3
expobiome_smorf_02840276																	6.05397e+07	1							1.20313e+07	1	1.19165e+07	1			8.90083e+06	1	4.65022e+06	1							2.54073e+07	2							4.98003e+06
expobiome_smorf_02840594																																	2.39424e+08	1									1.17652e+08	1
expobiome_smorf_02840658																			5.0915e+07	2					1.10193e+07	1							1.16596e+07	1					2.51948e+07	1
expobiome_smorf_02840696	2.69345e+08	4					5.39007e+08	5			2.98948e+07	1			2.48911e+08	4									9.78551e+07	2	3.71927e+08	4					1.41072e+08	3	9.5245e+07	3			3.04697e+08	4			6.33251e+07	2			1.23836e+08	3	1.85682e+08
expobiome_smorf_02840699	2.65977e+08	3									4.35521e+08	3			3.92765e+08	3			1.00058e+08	2	1.24491e+08	3			1.42836e+08	3	3.31885e+08	3					3.17679e+08	4	2.20741e+08	4							4.31673e+08	4	2.37723e+08	4	2.25023e+08	5	4.40713e+08
expobiome_smorf_02840890			2.27741e+07	1	3.41534e+07	1			1.73169e+07	1	4.17194e+07	1	1.96918e+07	1			3.95586e+07	2	1.80547e+07	1			1.07797e+07	1	8.71401e+06	1	4.6026e+07	1			2.55793e+07	1	1.50514e+07	1			3.99231e+07	1	3.50899e+07	1	1.08221e+07	1	6.2079e+06	1			1.53114e+07	1	2.24457e+07
expobiome_smorf_02841207	1.33522e+07	1			5.80323e+07	1	4.88223e+07	2			5.30767e+07	1	3.68443e+07	2			6.72202e+07	1			8.0924e+07	3			2.60815e+08	3							2.80198e+07	1											1.7068e+08	2
expobiome_smorf_02841313	1.65217e+07	1			8.50071e+06	1	3.21396e+07	1			5.61284e+07	1					1.2222e+07	1									9.27539e+06	1			1.5969e+07	1	2.03581e+07	1			1.11286e+07	1	1.20388e+07	1	3.73619e+07	1							1.03468e+07
expobiome_smorf_02841479																	6.08231e+07	1															2.05052e+07	1
expobiome_smorf_02841502																									7.54466e+07	1							1.16798e+08	1
expobiome_smorf_02841503																																	5.70344e+07	2
expobiome_smorf_02841662																																	7.58589e+06	1	4.15853e+06	1					5.76485e+06	1
expobiome_smorf_02841682			5.12962e+07	2	1.66647e+08	2	9.55919e+07	2	6.81588e+06	1							1.81069e+08	2			1.23007e+07	1	9.58002e+06	1			6.76526e+06	1	9.33508e+06	1			9.5451e+07	2							1.11596e+08	2	1.36147e+07	1					5.83327e+07
expobiome_smorf_02842004	2.08359e+07	1																															1.44786e+08	1
expobiome_smorf_02842114																																	2.18173e+07	1			1.93767e+07	1			4.07316e+07	1	9.0287e+06	1	5.17764e+06	1			1.19878e+07
expobiome_smorf_02842132	1.54697e+07	1	2.70551e+07	1									3.91084e+07	2	2.19682e+07	2	6.9201e+07	3					1.05933e+07	1							8.79383e+06	1			1.52488e+07	1			1.18943e+07	1	1.05051e+08	3			3.08893e+07	2
expobiome_smorf_02842162											1.56539e+07	1					5.45324e+07	2
expobiome_smorf_02842206											1.5103e+07	1																					1.28106e+08	5									1.22874e+08	3
expobiome_smorf_02842256			1.06655e+08	2									3.06953e+07	1																									1.53393e+07	1
expobiome_smorf_02842635	1.33572e+08	4	4.2857e+08	5	1.90724e+08	5			1.19219e+08	3	3.32742e+08	6	1.98477e+08	5									4.67728e+08	6			1.41766e+08	4					5.05371e+08	9					8.93527e+07	4	1.15242e+08	3	8.17814e+07	2	4.8134e+08	7	7.45283e+07	1
expobiome_smorf_02842736																															5.07652e+06	1
expobiome_smorf_02842755																																	4.54977e+07	1
expobiome_smorf_02842783					6.47976e+08	6															1.52366e+08	3											2.00205e+07	1
expobiome_smorf_02842978
expobiome_smorf_02843098	1.1789e+07	1	1.38578e+07	1	1.67868e+07	1			9.19208e+07	3	4.03601e+07	1	2.69164e+07	2	1.50087e+07	1	1.95981e+07	1					1.38464e+08	2					4.70186e+07	1	1.85703e+07	1	1.34094e+07	1			6.09537e+07	2	9.98947e+06	1	5.4009e+07	3	1.12765e+07	1
expobiome_smorf_02843100	1.61452e+08	2			1.00523e+08	2	7.77458e+07	2	1.66016e+08	2	1.23412e+08	2	5.13117e+07	2	1.58219e+07	1	3.82039e+08	5	1.67524e+08	2	1.36772e+07	1	2.03296e+08	2	1.3968e+07	1	1.04991e+08	1	1.07559e+08	2	1.27106e+08	2	5.3292e+07	2	1.96317e+07	1	1.36581e+08	2	2.65576e+07	1	2.51831e+08	3	1.60598e+07	1	1.43985e+08	2	1.1127e+07	1
expobiome_smorf_02843536																															1.38788e+07	1
expobiome_smorf_02843538			7.88627e+06	1			5.87485e+07	2																	3.69412e+06	1	5.52144e+06	1			1.94227e+07	1	7.65068e+06	1			5.00013e+06	1	1.24622e+08	2							3.8771e+06	1
expobiome_smorf_02843706	2.51301e+07	1																															1.54436e+07	1
expobiome_smorf_02843766																															3.46709e+07	1	4.07587e+07	2											4.76466e+07	2
expobiome_smorf_02843988			2.36069e+07	1			3.40299e+07	1									2.85097e+07	1															2.18701e+07	1	2.10036e+07	1					2.50876e+07	1					2.27891e+07	1
expobiome_smorf_02844043													5.61694e+06	1			5.93171e+07	1							1.44747e+07	1							2.16828e+08	3
expobiome_smorf_02844253
expobiome_smorf_02844757	6.53208e+07	3	2.07527e+08	4	1.01479e+07	1			1.50862e+07	1	9.67848e+07	2					7.0996e+06	1													2.07278e+07	1	2.0693e+07	1	1.1449e+07	1					9.23726e+07	3
expobiome_smorf_02845079																																	5.12315e+06	1											8.42051e+06	1
expobiome_smorf_02845080	4.58073e+07	3					4.92324e+07	4	1.97592e+07	2	6.25671e+07	3	8.31394e+06	1			3.55027e+07	2	1.50428e+07	1							1.70857e+07	1			3.72399e+07	3	6.11045e+07	4	2.26668e+07	2	1.57442e+07	1	1.03273e+07	1	1.67038e+07	1	1.40018e+07	1	5.62815e+07	3	2.2468e+07	2	8.89592e+06
expobiome_smorf_02845466																									3.71037e+07	2											1.46787e+08	3									1.62462e+07	1
expobiome_smorf_02845523	1.00445e+08	2	8.32011e+07	2							6.22597e+07	2	1.50013e+07	1									1.85817e+07	1			5.24181e+07	1					1.08599e+07	1							1.0141e+08	3			1.36312e+08	3
expobiome_smorf_02845880	9.89763e+07	2	1.08777e+07	1			6.25374e+07	2	1.08306e+07	1	1.49715e+08	2	6.51285e+07	1	1.92517e+07	1	2.75627e+07	1	3.22911e+07	2	4.53383e+07	2	4.72721e+07	2	3.86331e+07	2	1.14194e+07	1			1.59928e+07	1	1.94935e+08	2	3.72387e+07	2	1.43176e+08	2	8.4006e+07	3	6.13366e+07	2	4.40664e+07	2	9.50854e+07	2
expobiome_smorf_02846534	1.20472e+07	1	9.08514e+06	1							5.76634e+06	1			3.10215e+06	1	9.09669e+07	2					9.25154e+07	3	1.15911e+08	3	3.41597e+07	2			3.38824e+07	2	4.85746e+07	2	5.70156e+06	1					3.38707e+07	2			3.20924e+07	3	2.54297e+06	1	8.25809e+06
expobiome_smorf_02847055	1.27053e+07	1	1.06709e+07	1					9.74145e+06	1					9.47655e+06	1	1.78782e+07	1	9.94872e+07	3			1.26911e+07	1	1.56146e+07	1			2.63316e+07	1			7.11088e+06	1	1.52992e+07	1	3.75938e+07	1	1.08399e+07	1			1.19269e+07	1	1.31209e+07	1	9.5872e+07	3	3.64939e+08
expobiome_smorf_02847208									4.84414e+06	1																	3.54334e+06	1					2.6595e+07	2											1.22501e+07	1
expobiome_smorf_02847327			7.66519e+07	1			5.25113e+07	1	4.98633e+07	1	2.65814e+08	2			2.80679e+07	1	3.98614e+07	2					3.67595e+07	1	4.0068e+07	1	4.91272e+07	1			3.18576e+07	1	5.83442e+07	2					6.93963e+07	1					2.05296e+08	1	7.54222e+07	1
expobiome_smorf_02847513					1.54488e+07	1			3.21603e+07	1							4.1401e+07	3									1.72385e+07	1			1.59759e+07	1	6.57456e+06	1									6.13875e+07	2	8.22205e+07	2
expobiome_smorf_02847709	2.12189e+08	3					4.56787e+07	1	2.57629e+08	3	4.44735e+08	3	5.15656e+08	3	1.67906e+07	2	1.02312e+08	3					1.24868e+08	3			1.65426e+08	3			2.57958e+08	3	3.58042e+08	3	5.53782e+07	3					3.62382e+07	2	5.17275e+08	3	6.58389e+07	1
expobiome_smorf_02848134					2.2344e+08	4													7.18142e+06	1	7.48858e+07	3											7.18695e+06	1					6.97842e+06	1							5.68583e+06	1
expobiome_smorf_02848224					2.51641e+07	1	1.64598e+07	1													8.63295e+06	1	1.08787e+07	1	1.84762e+07	1							4.28531e+07	1	1.62413e+07	1									9.6577e+07	1
expobiome_smorf_02848269	3.55613e+07	3	9.64603e+07	3							1.12282e+08	3					1.0357e+08	5					1.44727e+07	1			7.16356e+06	1			3.09257e+07	3	2.1756e+07	2					7.32622e+06	1	1.40023e+07	1	7.77787e+06	1	2.23905e+07	2
expobiome_smorf_02848408																																	4.14356e+06	1
expobiome_smorf_02849210																																	1.02738e+08	1
expobiome_smorf_02850009	4.64009e+07	1	2.0621e+07	1							2.8856e+07	1											2.75259e+07	1							5.83539e+07	1	1.76791e+07	1	1.22309e+07	1					1.77086e+07	1			3.54102e+07	1
expobiome_smorf_02850138							4.5076e+07	1																	1.52495e+07	1							4.31196e+07	2					5.73827e+07	2
expobiome_smorf_02850139	4.20693e+07	1							7.27161e+07	1	1.60525e+07	1	6.73073e+07	2	1.79846e+07	1	6.31039e+07	1					3.91856e+07	1	3.75574e+07	1					6.67114e+07	1	9.0204e+07	1					9.77199e+06	1			3.72614e+07	1
expobiome_smorf_02850404																											1.30637e+07	1					1.79448e+07	2	2.77456e+07	2
expobiome_smorf_02850863					8.0768e+07	1																											4.25016e+08	1							6.20192e+07	1
expobiome_smorf_02851458			1.84681e+08	1	2.6641e+07	1	3.39999e+07	1	1.64887e+08	2											8.44215e+07	1	8.36707e+07	1									5.51243e+08	3	8.81991e+07	1					2.80255e+08	2	1.16941e+08	2	2.9609e+08	2
expobiome_smorf_02851459	4.54149e+07	1			1.72006e+07	1	1.02541e+07	1	6.07246e+07	2	2.11375e+08	2	9.99974e+07	2			2.55954e+08	2					4.16849e+07	1			3.97179e+07	1			1.86929e+07	1	1.44088e+08	2	1.20067e+08	2	2.13681e+07	1	1.53828e+07	1			7.03907e+07	2	1.26925e+08	2	9.71655e+06	1
expobiome_smorf_02851461															2.65823e+07	1	4.18694e+08	1															9.84505e+07	1							2.17889e+08	1			1.51683e+08	1			1.20775e+08
expobiome_smorf_02851462									2.0694e+08	1																							2.58333e+08	2									1.01571e+08	1	9.57091e+06	1
expobiome_smorf_02851799	9.53508e+06	1									1.1386e+07	1	3.08853e+07	1									1.12875e+07	1							2.79441e+07	1	2.68956e+07	1									8.91056e+07	1	1.00445e+07	1
expobiome_smorf_02851847	3.53403e+07	1							4.49226e+07	1																					1.78467e+07	1	1.25637e+07	1
expobiome_smorf_02851945	1.0818e+08	3	8.65682e+07	2			1.37319e+08	2	8.31551e+07	2	8.60505e+07	2	3.85435e+07	2			3.40209e+08	2			9.68312e+07	2	3.46149e+07	2	9.33623e+06	1	1.45001e+08	2			1.36364e+08	2	1.82831e+08	2	2.92411e+07	1	2.48221e+08	2	1.94619e+08	2	1.46998e+08	2	1.80205e+08	2	5.56706e+07	2	1.44752e+07	1	1.32283e+08
expobiome_smorf_02851955	2.5914e+07	1							3.35572e+07	1			8.98428e+07	1	8.02666e+06	1	7.78451e+06	1					4.01639e+08	3			2.21294e+07	1			5.7189e+07	1	4.04211e+07	1							1.75246e+07	1	1.07348e+08	2	3.91101e+08	3
expobiome_smorf_02851956											2.00583e+08	1	7.51267e+08	3			1.01712e+08	2			2.29525e+07	1	1.21561e+08	2	3.76419e+07	1					6.011e+08	3	1.72783e+08	1							7.64121e+07	2	1.23695e+08	2
expobiome_smorf_02851963													2.73838e+07	2																	1.95717e+07	1	3.40056e+07	2									1.66354e+07	1
expobiome_smorf_02851971											1.38924e+07	1	7.21671e+06	1																			1.59966e+07	1									3.72585e+07	1
expobiome_smorf_02851976	5.83055e+07	2					6.63194e+07	2	6.16009e+07	2	2.16877e+08	3	2.07278e+08	3					3.32395e+08	3			8.82249e+06	1	3.11652e+07	1	5.95253e+07	2			2.81701e+08	4	1.48546e+08	3	2.8243e+07	1					2.7047e+07	1	1.57509e+08	3	5.63023e+07	2
expobiome_smorf_02852065																			7.37677e+06	1											1.5505e+07	2	2.94549e+06	1	2.71357e+06	1									2.43139e+06	1			2.26295e+07
expobiome_smorf_02852211			2.04356e+07	1					5.24443e+07	2																					2.25428e+07	1	1.05278e+08	2									1.26009e+07	1
expobiome_smorf_02852249	2.87571e+07	2	2.2234e+07	1	1.45884e+07	1					1.46118e+07	1					6.47245e+07	3	1.93135e+07	1							1.27435e+07	1			2.34802e+07	2	3.11329e+07	3	1.906e+07	1	6.93386e+06	1	1.67664e+07	1							2.6611e+07	1
expobiome_smorf_02852279																																	8.74637e+08	7							8.34806e+08	7
expobiome_smorf_02852961					7.24737e+07	1	8.48136e+07	1							1.54006e+08	1			4.13937e+07	1	2.62321e+08	2							2.13878e+07	1	2.105e+08	2	1.67122e+07	1			8.8224e+07	1	6.24869e+07	1	1.38626e+08	2	4.38844e+07	1	6.1261e+07	1			1.2112e+08
expobiome_smorf_02853116													8.76775e+06	1			1.1461e+07	1															2.87484e+07	2
expobiome_smorf_02853201	2.63804e+08	3	2.58265e+08	3			4.15529e+08	4			4.12728e+08	4			1.78449e+08	4			1.11864e+08	3	8.39482e+07	2			1.26279e+08	3	4.60386e+08	3					2.04724e+08	4	2.43435e+08	4			6.002e+08	4			3.63947e+08	3	1.02617e+08	2	6.216e+07	2
expobiome_smorf_02853374																																	2.85229e+07	1	3.52175e+07	1
expobiome_smorf_02853485															9.70472e+06	1							2.06317e+07	1	6.97838e+06	1							1.1763e+07	1									4.9651e+06	1
expobiome_smorf_02853487
expobiome_smorf_02853995	4.1284e+08	1	2.76211e+08	1	2.92212e+07	1	1.0334e+08	2	2.44531e+08	1	3.10926e+08	2	4.7265e+07	1	1.42161e+08	1	4.39295e+07	1	3.46226e+07	1			1.2648e+08	1	8.60173e+07	1	1.33465e+08	1	9.76907e+07	1	1.84691e+08	1	3.32319e+08	1	6.63593e+07	1	4.30023e+07	1			1.72821e+08	1	8.81428e+07	1	4.36149e+08	2	2.56768e+08	1	5.68182e+07
expobiome_smorf_02854010																			1.32649e+07	1	1.17436e+07	1					2.62429e+07	1					9.88132e+06	1					2.74869e+07	1					9.97356e+06	1	2.36376e+07	1
expobiome_smorf_02854337			6.35446e+07	1	5.58513e+07	1	1.55874e+07	1	1.27914e+07	1	8.64254e+06	1	2.84702e+07	1	1.92087e+07	1					6.05303e+07	1					4.18195e+07	1					8.87216e+07	1			1.73466e+07	1							8.29752e+06	1	1.38006e+07	1	2.03164e+07
expobiome_smorf_02854472			6.72398e+07	1			8.51872e+06	1	6.83239e+06	1																					1.76368e+07	1											2.23443e+07	1	2.1223e+07	1
expobiome_smorf_02854523																																	4.30655e+07	1													3.26596e+07	1
expobiome_smorf_02854524	2.01056e+08	1					7.13072e+07	1			4.19061e+08	4							2.65669e+07	1									6.66192e+07	1			3.19425e+07	1	1.34765e+08	1									1.04529e+08	2
expobiome_smorf_02854584	8.7765e+07	3	6.52286e+07	3					4.28306e+07	1	6.45909e+07	3	1.10543e+07	1	3.37627e+07	2	3.64436e+07	1	1.17484e+07	1			1.7214e+07	2	1.95161e+07	1					3.0396e+07	1	7.09971e+07	3			1.51946e+07	1	1.23308e+07	1	1.23436e+07	1	1.47167e+07	1	1.86892e+08	4
expobiome_smorf_02854652																																	1.74538e+07	1
expobiome_smorf_02854686																											7.10507e+06	1					6.49889e+07	3	7.07888e+07	3
expobiome_smorf_02854699																																	3.13103e+07	2
expobiome_smorf_02854889											3.6962e+06	1					8.44562e+06	1	4.23867e+06	1			3.70425e+06	1							5.54808e+06	1	5.21375e+06	1	2.04675e+07	1	4.09021e+06	1	6.1785e+06	1	1.99747e+06	1					4.81927e+06	1	4.07498e+06
expobiome_smorf_02855008																																	2.20551e+07	1
expobiome_smorf_02855140	1.09505e+07	1									3.94227e+06	1	4.0479e+06	1	5.12545e+06	1																	7.14172e+06	1
expobiome_smorf_02855197			6.53059e+08	4			1.59476e+08	1	7.56687e+07	1	6.43913e+08	2	4.16964e+08	3	1.99481e+08	1	6.46635e+08	2					2.99688e+08	3	5.57336e+08	3			1.69144e+08	2			9.52441e+07	3									8.32633e+08	4	2.95898e+07	1	5.94573e+07	2
expobiome_smorf_02855367			8.35896e+07	1	1.32998e+07	1			6.99084e+06	1	7.38002e+06	1							9.48013e+06	1													6.08546e+06	1			2.05009e+07	1									7.96073e+06	1	1.37764e+07
expobiome_smorf_02855465																																	2.47457e+07	1
expobiome_smorf_02855466	1.33427e+07	1	3.11679e+07	1			2.12711e+07	1									1.19816e+08	2													1.37154e+07	1	1.18676e+07	1			1.47409e+07	1			2.51502e+07	1			3.12894e+07	2			7.91552e+06
expobiome_smorf_02855467	1.76149e+08	1							9.97912e+07	1			5.05263e+07	1			9.18314e+07	1					8.28089e+07	1	8.21809e+07	1	3.53204e+08	2			1.05537e+08	1	2.11372e+08	1	6.71898e+07	1	4.20454e+07	1					4.71608e+07	1	3.78201e+08	1	1.487e+08	1
expobiome_smorf_02855702	2.77916e+08	2	1.32951e+08	2			1.75645e+08	2	2.81601e+08	2			1.13433e+08	2			2.58225e+08	2	2.73354e+08	2	6.09929e+07	2	4.46665e+08	2	5.69805e+07	2			1.66497e+08	2	1.30791e+08	2	1.49501e+08	2	3.9529e+07	2	1.60149e+08	2			3.07972e+08	2			2.12727e+08	2
expobiome_smorf_02855747			2.507e+07	2																	5.41888e+07	2			3.17503e+07	1							2.68993e+07	1					1.66326e+07	1	1.22642e+07	1							2.90293e+07
expobiome_smorf_02855850							1.89724e+07	1									3.00705e+07	2	6.20586e+07	2													1.95913e+07	1	7.09205e+07	1			2.13199e+07	1			2.05095e+07	1
expobiome_smorf_02855945							6.3273e+07	2											3.11174e+07	1	7.5457e+08	4							4.82638e+06	1	2.8736e+08	2	1.34698e+07	1	1.70373e+07	1	1.82075e+08	2	9.04286e+07	2			3.94195e+07	1	6.4166e+07	2			1.30328e+08
expobiome_smorf_02855969			1.4481e+07	1					3.14816e+07	3			1.68832e+07	1									1.26144e+07	1											1.47962e+07	1									1.47371e+07	1
expobiome_smorf_02856085					1.09232e+07	1															1.02981e+07	1			1.14857e+07	1			1.03102e+07	1			1.02975e+07	1
expobiome_smorf_02856099	1.70757e+08	1	1.39734e+08	1					3.49889e+08	2			7.77424e+07	1	2.7411e+08	1	2.29109e+08	1	2.37526e+07	1							2.19843e+08	1			2.08075e+08	1	2.47497e+08	2	3.81538e+07	1	1.23716e+08	1			2.01438e+07	1	3.00881e+07	1	8.59447e+07	1	1.05651e+08	1
expobiome_smorf_02856460	2.59932e+07	1									6.72501e+07	3							3.09071e+07	2			1.75589e+08	1			4.23364e+07	2	1.90569e+07	1			1.09689e+07	1							6.68744e+07	3
expobiome_smorf_02856512																															4.16741e+07	2	3.31197e+06	1
expobiome_smorf_02856514	2.59218e+08	2	2.69036e+08	2															4.35221e+06	1			1.981e+07	1	1.35517e+08	2	1.24445e+08	1	2.23809e+07	1	1.75201e+08	2	1.42244e+08	2	2.24781e+08	2			4.75442e+07	2	2.99232e+08	1	4.61626e+07	1
expobiome_smorf_02856515			2.96226e+07	1																																					3.20263e+08	1							4.60363e+06
expobiome_smorf_02856516																																	6.02775e+07	2	7.95864e+07	1
expobiome_smorf_02856517	2.80973e+07	2																			3.39821e+07	1	3.12567e+07	1	1.36221e+08	1	1.09277e+07	1			7.06785e+07	3	1.42433e+08	3	3.60828e+07	1			1.89758e+07	1	1.18277e+08	1	8.88664e+06	1	3.03872e+07	1			1.4366e+07
expobiome_smorf_02856598			6.15401e+06	1	1.22207e+07	1			6.61462e+06	1											2.59259e+07	1			2.76428e+07	1					1.2262e+07	1	2.78037e+07	1					1.27875e+07	1	6.93274e+06	1			1.1365e+07	1	8.37871e+06	1	4.84691e+07
expobiome_smorf_02856665			2.5999e+08	4			4.07633e+08	3			3.2175e+08	4			4.08047e+08	4			3.65641e+07	1	1.72353e+08	2			2.8832e+08	5	4.99755e+08	5					1.07162e+08	2	3.38597e+08	4			9.27844e+08	4			5.43114e+08	5	2.75931e+08	3			3.94564e+08
expobiome_smorf_02856666	1.42685e+08	3	8.90335e+07	2			2.04665e+08	4			1.58159e+08	4			7.89062e+07	2			3.04729e+07	2	6.18343e+07	3			1.85315e+07	1	1.64056e+08	3					4.95698e+07	2	8.0985e+07	2			2.65161e+08	4			1.05148e+08	2	7.79923e+07	2	6.21463e+07	2	1.66385e+08
expobiome_smorf_02856668	1.18564e+09	3	6.08946e+08	3			1.00345e+09	3			8.50931e+08	3			9.18238e+08	3			2.56854e+08	3					6.52031e+08	3	1.08425e+09	3					7.78071e+08	4	3.16506e+08	1			1.39691e+09	3			8.66302e+08	3	3.7249e+08	3
expobiome_smorf_02856792							2.71606e+07	1																									3.56681e+08	2
expobiome_smorf_02856976	5.23466e+07	1	8.21588e+06	1			4.42121e+07	1	1.36513e+08	2							6.02926e+07	2	3.75499e+07	1									2.77509e+07	1	2.4765e+07	1	3.35507e+07	1	1.87053e+07	1	3.74167e+07	1			1.25182e+07	1					1.94411e+07	1
expobiome_smorf_02856977	7.74874e+07	1	4.68169e+07	2					3.26468e+07	2	1.76404e+07	1					1.63995e+08	3	3.80588e+07	1			7.01748e+07	3									8.21421e+07	2							3.03408e+08	6
expobiome_smorf_02857017	8.61828e+07	1	7.13817e+07	1			4.97558e+07	1	1.50805e+08	2	6.06409e+07	1	4.90503e+07	1			5.99851e+07	1			3.41685e+07	1					1.30116e+08	2			9.58694e+07	1	1.70409e+08	2	3.90756e+07	1	7.83061e+07	1	1.49979e+08	1	4.2293e+07	1	9.65639e+07	1
expobiome_smorf_02857193																																	1.243e+07	1
expobiome_smorf_02857211																																	3.0982e+06	1
expobiome_smorf_02857289			1.3331e+08	3	1.10472e+08	2	3.44236e+07	1	5.58176e+07	1							1.32903e+07	1			9.63142e+07	1	2.72448e+07	1			1.85854e+07	1	3.71253e+06	1			1.18153e+08	2	6.6319e+07	2			8.42785e+06	1			2.8384e+07	1	4.56312e+07	1	3.01114e+07	2
expobiome_smorf_02857435	1.12561e+07	1	6.90936e+06	1			4.29963e+07	2			2.83533e+06	1									1.49663e+06	1					4.35168e+06	1					4.27997e+06	1	5.88127e+06	1	3.01154e+06	1			7.7764e+06	1	1.82388e+06	1	7.35569e+06	1	4.23498e+06	1	1.3889e+07
expobiome_smorf_02857477	1.78872e+07	1																															3.76926e+07	1											8.13043e+07	1
expobiome_smorf_02857564			2.46246e+07	1			1.35631e+07	1	2.47809e+07	1	3.65015e+08	5	5.09865e+08	6			3.55166e+07	1	3.6212e+07	1					3.91015e+07	1					1.30035e+07	1	1.67204e+08	3			3.44171e+08	4	2.85113e+07	1			6.95849e+07	2
expobiome_smorf_02857671	4.81209e+07	1											2.39221e+07	1					3.23334e+07	1							3.57855e+07	2			6.66635e+07	2	3.85983e+07	1					2.4336e+07	1							3.57787e+07	1	7.09707e+07
expobiome_smorf_02857679	2.02661e+08	1	1.46404e+08	1					1.64753e+08	1	2.67016e+08	2			1.55047e+08	1	1.47025e+08	2	4.21863e+07	1			2.13423e+08	1	7.11155e+07	1	3.59084e+06	1			6.82326e+07	1	2.28271e+08	2	1.10898e+08	1					5.26796e+07	1	7.57644e+07	1	3.96125e+06	1	6.48249e+07	1
expobiome_smorf_02857815	5.19218e+08	6	3.28069e+08	4	1.77799e+07	1					5.98602e+07	1	1.85372e+08	4	8.16083e+07	2	3.14608e+08	4			1.66356e+08	3	1.55277e+08	3	7.53125e+07	2	3.76254e+07	1	9.11331e+06	1	1.19414e+08	2	4.39452e+08	5	2.17581e+08	3			8.27747e+07	3	1.89046e+07	1	3.58122e+07	1	1.63466e+08	3	1.31096e+08	3	5.05708e+06
expobiome_smorf_02857994																																	5.7771e+06	1
expobiome_smorf_02858035							2.71424e+08	4	5.46575e+07	1							4.9098e+07	3	1.21457e+08	3			3.82842e+07	1			1.4691e+08	2			1.4203e+08	2	6.91739e+07	1	1.18875e+08	2			8.64493e+07	1			1.08757e+08	2			2.04123e+08	2
expobiome_smorf_02858069					1.74522e+07	1	4.15325e+07	2											9.48067e+06	1							2.31739e+07	1					1.25972e+07	1	7.97341e+06	1			1.06621e+07	1							4.9112e+07	2
expobiome_smorf_02858105			1.43257e+08	3	1.61098e+07	1																									2.99826e+07	2	3.55402e+07	3			1.39001e+07	2
expobiome_smorf_02858208							5.74496e+07	4	3.18028e+07	2			4.90948e+07	3																			1.1337e+07	1	5.77088e+07	2									4.45063e+07	2	4.47521e+07	2	4.58075e+07
expobiome_smorf_02858911			3.60041e+07	1			1.02348e+07	1	1.35148e+07	1											4.75046e+07	1					6.06671e+07	2					7.49218e+07	2					6.7503e+07	1	2.29539e+07	1					2.59059e+07	1	1.43708e+07
expobiome_smorf_02859089													5.43276e+07	1							4.11846e+06	1											3.53116e+07	1
expobiome_smorf_02859090							1.56984e+07	1			1.56636e+08	2	6.90553e+07	2																	5.24752e+07	2	5.42585e+07	2							6.26545e+07	2	3.98272e+07	2
expobiome_smorf_02859182	2.01087e+07	1									1.159e+07	1					4.49744e+07	1	1.81431e+07	1			6.55614e+06	1	7.24181e+06	1					8.61106e+06	1	6.69158e+06	1	1.85621e+07	1	1.67769e+07	1	2.0383e+07	1	1.67146e+07	1			2.17977e+07	1
expobiome_smorf_02859295	7.7717e+06	1	2.73847e+07	2			5.71339e+07	2			5.00586e+07	2													1.08348e+07	1	2.34714e+07	2					5.60957e+06	1	1.42064e+07	1			4.44468e+07	2			2.48387e+07	2	2.38461e+07	2	1.41086e+07	2	2.66702e+07
expobiome_smorf_02859300	3.3959e+08	2	1.87258e+08	3							1.90628e+08	1							3.3737e+07	1	6.09947e+07	1			2.13343e+08	3	2.37592e+08	2					2.69652e+08	3	1.66089e+08	1			3.89257e+08	4			4.77547e+08	4	1.2058e+08	3	7.06275e+07	1
expobiome_smorf_02859301	4.81964e+08	2	1.85963e+08	2			4.16313e+08	3			4.50471e+08	3			7.91531e+08	4			7.12008e+07	2					2.04873e+08	2	4.55744e+08	4					3.38102e+08	2	2.54522e+08	1							4.95724e+08	3	1.2313e+08	2	1.4366e+08	2	4.78025e+08
expobiome_smorf_02860043																																	1.35475e+08	2							1.31677e+08	1
expobiome_smorf_02860669			7.78968e+06	1					5.26222e+06	1			3.13831e+06	1					3.52709e+06	1							1.18531e+06	1					2.89815e+06	1									6.16235e+06	1
expobiome_smorf_02860888	6.81553e+07	1	1.08476e+08	2	3.4818e+06	1	4.21623e+07	1	2.34601e+08	2	2.57065e+07	1	1.73154e+07	1	3.0456e+07	1	4.27392e+07	1			1.41693e+08	2	1.44386e+07	1	1.49558e+07	1	1.47172e+08	2			4.99096e+07	1	1.82619e+08	2	3.31724e+07	1	4.77579e+07	1	1.82965e+08	3	4.02221e+07	1	6.86803e+07	2	1.08645e+07	1	1.00325e+08	2	6.24314e+07
expobiome_smorf_02861088	3.86688e+08	1	5.17554e+08	2			2.59495e+08	2	3.39964e+08	1	1.33809e+08	1			1.62951e+08	1	2.71895e+08	1	5.07403e+07	1			1.93138e+08	1			3.97573e+08	2	6.93516e+07	1	2.60719e+08	1	5.26626e+08	2			1.57607e+08	1	2.33482e+08	2			1.39999e+08	1	5.52145e+08	2			1.23116e+08
expobiome_smorf_02861090											1.20205e+07	2					8.24858e+06	1															9.23488e+06	1											8.07894e+06	1
expobiome_smorf_02861418					7.07809e+06	1													3.5484e+07	1	5.02276e+07	1	6.9857e+07	1	5.8391e+07	1					1.44995e+07	1	9.94596e+07	2	3.00193e+07	1	1.11191e+07	1
expobiome_smorf_02861525			5.55845e+07	1	1.012e+08	1	1.33282e+07	1	8.40362e+07	2	4.91363e+07	1	4.38893e+07	1							2.10621e+07	1									1.60706e+08	2			2.16532e+08	2	7.17063e+07	2			4.60205e+07	1	9.21265e+07	2			2.3242e+07	1	3.71143e+07
expobiome_smorf_02861616	1.48057e+07	1	3.58235e+07	2			1.79442e+07	1							3.36475e+08	2					8.5678e+06	1			2.29823e+08	3	4.43098e+07	1					1.16484e+07	2					1.67488e+08	1			5.17304e+07	1	3.16701e+07	3	1.20025e+07	2	1.6795e+07
expobiome_smorf_02861821																																	1.07633e+07	1
expobiome_smorf_02862071													2.26345e+07	1			2.04584e+06	1							1.17794e+07	1							5.63712e+07	3											9.53024e+06	1	2.68226e+07	2
expobiome_smorf_02862294																	1.97067e+07	1															6.19401e+07	1	2.09195e+07	1
expobiome_smorf_02862356			2.37089e+07	1																											1.14457e+08	2			1.4673e+08	3							2.66565e+07	1
expobiome_smorf_02862568	6.32297e+07	2	7.13867e+07	1			1.70291e+08	3	1.20274e+07	1	7.53566e+07	2	1.09987e+08	1					1.77889e+07	1	5.46769e+07	1	1.03008e+07	1			1.58355e+07	1	4.44448e+06	1	2.05949e+07	1	1.36913e+08	2	2.03042e+07	1	4.2017e+07	2			1.36643e+08	3	4.96951e+06	1	9.79328e+07	2	1.80987e+07	1	1.16466e+08
expobiome_smorf_02862572	1.2518e+08	2															4.05501e+07	2	1.17989e+07	1	1.49699e+07	1	1.82961e+07	1			1.46911e+07	1							1.27682e+07	1	4.46894e+07	1	1.74524e+07	1	3.27376e+07	1			3.6807e+07	1
expobiome_smorf_02862574	1.11339e+08	2	7.59474e+06	1			6.82676e+07	2	1.97818e+07	2	1.04946e+08	2			6.04374e+07	2	2.01424e+07	1			1.10482e+08	4	9.52923e+07	3	1.71673e+08	4							1.8175e+08	4	1.02233e+07	1	6.17451e+08	5			4.99577e+07	2	7.69277e+07	3
expobiome_smorf_02862630	4.60829e+07	2			2.55591e+07	2							2.72194e+07	2	1.11895e+07	1									4.11849e+07	2					1.59875e+07	1	5.96195e+06	1
expobiome_smorf_02862697	5.00083e+07	1	8.37548e+07	1			3.65839e+07	1	7.88548e+07	1	6.30754e+07	1			3.82285e+07	1	2.38551e+08	1	3.18612e+07	1	5.14426e+07	1	7.42741e+07	1	1.01463e+08	1	6.34329e+07	1			5.39689e+07	1	6.34546e+07	1	5.57265e+07	1	3.77447e+07	1			5.37754e+07	1			7.07732e+07	1			8.44708e+07
expobiome_smorf_02862874			1.98613e+07	1									5.40456e+06	1											2.80827e+07	2							7.41377e+07	1	3.31201e+06	1	8.00405e+06	1			2.99392e+06	1
expobiome_smorf_02863091	3.66197e+07	1	3.00907e+07	1							5.86908e+07	1																			6.34719e+06	1	4.47134e+06	1											4.00211e+06	1
expobiome_smorf_02863142	1.10017e+08	4			5.72001e+07	2			6.75966e+07	3	2.43028e+08	4			1.06435e+07	1	2.23365e+08	3	1.68689e+08	3			6.19327e+07	2	3.874e+07	3	1.78967e+08	4	2.37418e+07	2	2.43595e+08	4	1.26475e+08	3	1.06821e+08	3	1.56813e+08	3	1.37167e+08	3	8.72962e+07	3			7.63295e+07	2			6.64736e+07
expobiome_smorf_02863144																	1.08124e+08	3																							3.36578e+07	1							2.01654e+07
expobiome_smorf_02863145											3.33779e+07	1					4.67491e+07	1	3.61996e+07	1			4.07251e+07	1			3.23616e+07	1					3.43418e+07	1			3.20692e+07	1	3.11221e+07	1							2.76088e+07	1
expobiome_smorf_02863149	8.25913e+06	1							6.74868e+06	1																							1.16035e+07	1
expobiome_smorf_02863293					9.22048e+07	1	1.78226e+08	2							2.21844e+08	1			3.93109e+07	1	3.17871e+08	2							2.87721e+07	1	2.59579e+08	3	2.18756e+07	1			2.51265e+08	1	1.31061e+08	1	2.8358e+08	1	5.94878e+07	1	8.91622e+07	2			1.95649e+08
expobiome_smorf_02863822	2.49302e+08	3	4.84832e+08	2	1.69496e+07	1	1.03781e+07	1	9.21457e+07	2	4.39215e+08	3	1.12858e+08	2	2.18702e+07	1	3.74969e+08	3	8.81463e+07	2	6.54403e+07	2	5.32852e+07	2	8.77971e+07	2	8.54513e+07	2			2.52054e+08	2	2.49499e+08	3	1.67853e+08	2			1.14316e+08	2	1.31093e+08	2	8.49143e+07	2	1.36732e+08	2	1.77446e+07	1	2.13687e+07
expobiome_smorf_02863868															2.64788e+07	1																	4.10172e+07	1							8.66421e+06	1			7.36602e+07	1			3.38649e+07
expobiome_smorf_02864346							2.02647e+07	1			6.01142e+07	1					4.25373e+07	2									1.21778e+07	1					8.27366e+07	2	1.92295e+07	1	4.15955e+07	1							2.20599e+07	1
expobiome_smorf_02864347	5.44492e+07	2	9.13543e+07	3							2.06498e+08	3					4.62441e+08	4									7.36829e+07	2					3.81298e+08	5			1.80992e+08	4							5.53889e+07	2
expobiome_smorf_02864387																																	1.10109e+07	1
expobiome_smorf_02864523	7.45256e+06	1									1.15586e+07	1					8.62924e+06	1	8.46345e+06	1			8.86256e+06	1	1.24009e+07	1	1.18847e+07	1			1.96615e+07	1	8.43463e+06	1															1.048e+07
expobiome_smorf_02864564																	4.17081e+06	1													5.09554e+06	1											1.30736e+06	1
expobiome_smorf_02864565	1.29168e+08	3					7.00266e+06	1	1.98932e+08	3	1.69683e+08	4	2.6643e+08	4	9.62661e+07	1	2.86123e+07	1	9.48433e+06	1	1.20538e+07	1	3.91953e+07	2	1.86034e+07	1	5.26624e+07	2			1.94757e+08	3	3.6857e+08	4	1.79975e+07	1					7.39798e+07	3	3.68595e+08	4	4.68056e+07	2
expobiome_smorf_02864567											8.80463e+06	1	1.58707e+07	1			1.89378e+07	2													6.93099e+06	1									7.33919e+06	1
expobiome_smorf_02864933	9.41409e+07	3					7.0247e+07	3			1.56022e+08	3	4.15571e+08	3			3.10246e+07	2	5.4795e+07	2			5.03895e+07	3	6.11084e+07	2							1.38642e+08	3	3.60688e+07	2	2.80674e+08	3	2.0225e+07	2	4.21933e+07	2	9.04869e+07	3	1.54504e+08	3			1.11806e+07
expobiome_smorf_02865162	3.17909e+07	1	1.3215e+08	1			2.03516e+07	1	3.11506e+08	1							4.64957e+08	1	6.41897e+06	1			6.10152e+07	1					1.37909e+07	1	2.69229e+08	1	3.43107e+08	1	3.06291e+08	1	2.13832e+07	1							1.7302e+08	1
expobiome_smorf_02865348	1.17155e+08	2	1.71207e+08	2	2.65955e+07	1			9.32305e+07	1	1.38492e+08	2	4.23379e+07	1	1.08517e+07	1	1.85148e+07	1					8.50577e+07	2									2.33295e+08	2					1.42902e+07	1	9.698e+07	2			1.55602e+08	3
expobiome_smorf_02865427					1.30598e+08	2															1.43861e+07	1											9.04875e+06	1					1.83632e+07	2
expobiome_smorf_02865473	1.34318e+08	1	2.98294e+08	2					1.09485e+08	1	3.63345e+08	4			6.41026e+07	1	1.63549e+09	7													2.06679e+08	2					5.10699e+07	2	1.61574e+07	1			4.93089e+07	1	6.51024e+08	3	7.03427e+07	1
expobiome_smorf_02865625							1.46218e+07	1			1.95414e+07	1					1.1701e+07	1															6.37608e+06	1							8.43431e+06	1			1.15399e+07	1
expobiome_smorf_02865657	7.06596e+07	2							3.93478e+07	1	2.0076e+08	3	1.35231e+08	2	1.27869e+07	1	2.11308e+08	2	1.51345e+07	1	1.32753e+08	2	5.49912e+07	1			3.29349e+07	1	2.79886e+07	1	2.2617e+08	3	7.09859e+07	1	5.42669e+07	2	1.12047e+08	3	1.63453e+08	3	8.01102e+07	2	2.63906e+07	1	5.13229e+07	1	2.62324e+07	1	9.93765e+07
expobiome_smorf_02865762			9.82943e+07	2			4.66317e+07	3	5.55742e+07	2	1.75771e+07	1	6.20233e+07	2	1.36524e+07	1	2.64756e+07	1	5.27908e+07	2			4.72843e+07	2	2.75171e+07	2	5.85362e+07	2			3.95311e+07	1	3.00938e+07	1	1.11128e+08	3			7.50923e+07	3	2.39999e+07	2	8.09754e+07	2	7.95717e+07	2			1.37825e+07
expobiome_smorf_02865774																															2.80581e+07	1
expobiome_smorf_02865875																	2.42203e+07	1															1.0617e+07	1
expobiome_smorf_02865922					7.11739e+07	1							1.3911e+07	1													1.61753e+07	1					2.12034e+07	1	3.59474e+07	1					2.46483e+07	1
expobiome_smorf_02866304	3.7319e+07	1	7.47264e+07	1					3.00498e+07	1	5.41526e+07	2			1.63302e+07	1	7.76718e+06	1	1.63725e+07	1			1.6273e+07	1									3.04722e+07	1					1.38118e+07	1	1.33035e+07	1	1.2197e+07	1	1.37663e+07	1
expobiome_smorf_02866915			8.2856e+07	1	8.96186e+07	1			1.76674e+07	1	2.49816e+08	2					3.03885e+08	3	5.37609e+07	1			7.40412e+07	2	9.98469e+06	1	3.03664e+07	1			8.05021e+07	1	4.97913e+07	1	5.55909e+07	2	7.62624e+07	2	1.09496e+08	2	1.2342e+08	1			4.41508e+07	1	3.68333e+07	1	1.58343e+08
expobiome_smorf_02867074	1.1343e+07	1	7.81902e+06	1					3.37028e+07	3																	1.41952e+07	1			1.31603e+07	1	1.43276e+07	2					1.69457e+07	1
expobiome_smorf_02867207			3.01091e+07	1							1.99038e+07	1					2.27024e+07	1									1.35392e+07	1					7.76513e+07	2			3.06478e+07	1
expobiome_smorf_02867357							2.23022e+07	1					1.88242e+07	1									1.86543e+07	1							2.18372e+07	1	6.09624e+07	2													3.87657e+07	1
expobiome_smorf_02867363	2.10472e+07	1	5.26608e+07	2					6.67832e+07	2			1.50176e+07	1	1.88643e+07	1	8.34579e+06	1			2.7538e+07	1					4.54186e+07	2			6.78496e+07	2	5.00839e+07	1	1.18764e+07	1	2.12434e+07	1	2.87468e+07	1			1.56654e+07	1					9.84719e+06
expobiome_smorf_02867922																	3.71555e+07	1															4.77829e+06	1
expobiome_smorf_02868239	1.39846e+08	1	1.64383e+08	1	3.50301e+07	1	5.95295e+07	1	2.25677e+08	2	1.13253e+08	1	1.4772e+07	1			9.23842e+06	1	2.72212e+07	1	1.29477e+08	1	3.3472e+08	1	2.74525e+08	1	1.62845e+08	1	1.53635e+07	1	8.87228e+07	1					1.06712e+08	1	6.04262e+07	1	9.3117e+07	1	1.07675e+08	1	1.99265e+08	1	1.25191e+08	1	1.4111e+08
expobiome_smorf_02868500																					1.64418e+08	3	5.95928e+08	4							2.94751e+08	3											3.55588e+08	3	1.0023e+08	2
expobiome_smorf_02868852																																	9.77057e+07	1
expobiome_smorf_02868885									5.32061e+06	1							4.46653e+08	3							1.58394e+07	1					5.24722e+07	2													3.07261e+07	1			6.60312e+07
expobiome_smorf_02869010
expobiome_smorf_02869318																									6.00168e+07	2							5.63677e+07	2					1.51532e+07	1									7.81696e+07
expobiome_smorf_02869329	7.82907e+07	3	1.9885e+07	1					3.01903e+07	2	8.25159e+07	3	6.80092e+07	3			1.25977e+07	1			1.62875e+07	1	3.82179e+07	2							1.4048e+07	1	1.27386e+08	4			1.49924e+07	1
expobiome_smorf_02869365			2.83124e+08	4									3.05585e+07	1			9.54222e+07	2					8.74673e+07	2			8.82431e+06	1					1.25564e+07	1							3.84899e+07	1			1.66267e+08	3			5.89244e+06
expobiome_smorf_02869372			6.75015e+07	2			7.48624e+06	1	5.84845e+07	2											1.11594e+07	1	4.86445e+07	2							3.15651e+07	2	1.59411e+08	2							3.41217e+07	2			1.7024e+08	2
expobiome_smorf_02869484			2.33608e+07	1									9.56274e+07	3					1.1225e+07	1			1.23143e+07	1			1.81074e+07	1			1.25823e+07	1	8.88605e+06	1			5.77706e+07	1					1.73519e+07	1
expobiome_smorf_02869506																													1.08548e+07	1			1.67605e+07	1											2.65548e+07	1
expobiome_smorf_02870632																																	9.20251e+07	4
expobiome_smorf_02870686					1.80811e+07	1	3.06294e+07	1											2.72337e+07	1													2.1243e+07	1							2.66156e+07	1					4.56392e+07	1	3.17676e+07
expobiome_smorf_02870735									2.79989e+08	8	3.57874e+08	8	2.63775e+08	7			2.46523e+08	3			2.72987e+08	7	4.9448e+07	3					1.3959e+08	7	2.81385e+08	7	1.03904e+08	5	3.00436e+08	8					4.52602e+08	8			1.47976e+08	5
expobiome_smorf_02871006																																	1.7458e+07	1
expobiome_smorf_02871008					5.66008e+06	1																											2.02415e+08	4							5.57759e+07	2
expobiome_smorf_02871014									9.80596e+07	2			2.79264e+08	2			9.96893e+07	2					3.80478e+08	1	1.57103e+08	2					1.77675e+08	2	1.60414e+08	2	1.47534e+07	1
expobiome_smorf_02871523			1.59205e+07	1					9.41933e+06	1			1.33265e+07	1	7.12974e+06	1	1.19125e+07	1									2.13749e+07	1			4.13119e+07	1	1.04662e+07	1			2.279e+07	1					2.23986e+07	1	1.18659e+07	1	7.60265e+06	1	2.19525e+07
expobiome_smorf_02871588	1.08075e+09	7					1.4074e+09	7	1.22467e+08	4	2.74554e+09	8			2.65876e+08	5	1.10049e+09	4	8.24913e+08	7	3.58406e+08	5	2.13664e+08	3	1.61426e+08	3	1.36742e+08	3	5.63542e+07	2	4.62014e+08	4	2.09926e+09	8	5.11348e+08	7	1.8825e+09	6	2.95059e+08	4			5.05537e+08	7	8.5673e+08	7	4.55362e+07	2	7.16274e+08
expobiome_smorf_02871592																	1.10761e+08	1															1.24493e+08	1											4.87594e+07	1
expobiome_smorf_02871630	2.48176e+07	1									5.986e+07	1	9.6564e+07	3							3.24515e+07	1											1.18828e+08	3											4.29818e+07	2
expobiome_smorf_02871631											4.54262e+07	1					7.43674e+07	2																							4.75847e+07	1
expobiome_smorf_02871688			1.1706e+08	2	5.46095e+07	1	5.16886e+07	2	3.14075e+07	1			1.65166e+07	1	3.09383e+07	1	4.1763e+07	1			3.09596e+07	1											6.56195e+07	2	4.44074e+07	1					8.25412e+07	2	2.03583e+07	1			3.54776e+07	2	2.01819e+07
expobiome_smorf_02871896																	9.34159e+06	1					3.96403e+06	1									7.18838e+06	1							8.04559e+06	1							8.84885e+06
expobiome_smorf_02871935	2.7541e+08	3	4.2245e+08	3			7.84542e+08	3			6.51554e+08	3			1.2502e+08	3			6.48348e+07	2	8.13772e+07	3			1.45261e+08	2	4.15638e+08	3					2.12815e+08	3					3.49739e+08	3					1.23768e+08	3	1.9602e+08	3
expobiome_smorf_02871936	4.16943e+07	1	2.48486e+07	1			3.67026e+07	2							2.46394e+07	1			7.00742e+06	1	1.59554e+07	1			3.76734e+07	2	7.72423e+07	2					2.26009e+07	2	3.36844e+07	1			8.64746e+07	2			4.60085e+07	2	8.86816e+06	1	3.92856e+07	2	2.9395e+07
expobiome_smorf_02872039																																	5.79837e+07	1
expobiome_smorf_02872473
expobiome_smorf_02872475																	1.65789e+08	2															3.14143e+07	1			1.33553e+07	1
expobiome_smorf_02872970															4.40683e+07	2																	5.01715e+06	1			4.92241e+06	1	4.43857e+06	1			6.27972e+06	1					7.46523e+07
expobiome_smorf_02873066	2.04008e+07	2	1.06864e+07	1					1.33775e+07	1	5.3168e+06	1	8.59507e+06	1	6.80383e+06	1	7.7989e+06	1					7.4081e+06	1	5.39531e+06	1					6.29663e+06	1	1.04938e+07	1	6.86426e+06	1									1.13632e+07	1
expobiome_smorf_02873147					3.34331e+07	2																											5.37662e+07	2
expobiome_smorf_02873165																																	2.20807e+07	1	1.81377e+07	1									1.18495e+07	1
expobiome_smorf_02873221																																	5.62615e+06	1
expobiome_smorf_02873309			5.02773e+07	2	1.50512e+07	1							6.94215e+06	1			1.31798e+08	2							4.60148e+06	1							7.17056e+06	1													7.00456e+06	1
expobiome_smorf_02873338																			1.45205e+08	1
expobiome_smorf_02873368																	1.50786e+08	1									1.79605e+08	2					7.84757e+07	1	2.34332e+08	3							1.18965e+08	1
expobiome_smorf_02873425			1.52617e+08	1	3.1846e+07	1																											6.79998e+07	1													2.60243e+07	1	3.40449e+07
expobiome_smorf_02873526			3.94176e+07	1											3.16172e+07	1	1.04069e+08	1			4.68468e+07	1	8.90485e+07	1	8.05038e+07	1					1.98121e+07	1	8.85274e+07	2	3.15728e+07	1	1.64393e+07	1							7.49428e+07	1	2.33028e+07	1	1.63783e+07
expobiome_smorf_02873741			1.31374e+07	1	1.48912e+07	1	5.08803e+07	2					1.80897e+08	3					1.42994e+08	3	8.82469e+06	1											2.52562e+07	1			2.79793e+07	1			2.83806e+07	1	9.01408e+06	1	2.77788e+07	1
expobiome_smorf_02873871															1.36711e+07	1	7.03471e+07	1	6.0185e+07	1													2.55425e+07	1
expobiome_smorf_02873941	4.11315e+07	1			1.37633e+07	1					5.53382e+07	1							1.20174e+08	2	1.81309e+07	1	5.03549e+07	1	1.15745e+08	1					5.59718e+07	1	8.18474e+07	1	8.32412e+07	1			1.11323e+08	1			1.24825e+07	1	1.31103e+08	1	1.26737e+07	1
expobiome_smorf_02874186																																	3.06361e+06	1
expobiome_smorf_02874256	7.10661e+07	2							4.27838e+07	2	3.63332e+07	2	7.22788e+06	1	4.30723e+07	2	7.05885e+07	2					4.86924e+07	2			1.36764e+07	1			5.38796e+07	2	9.30109e+07	2	9.05698e+06	1							1.41316e+07	1
expobiome_smorf_02874410													3.07258e+07	1																			1.29971e+07	1							9.13414e+06	1
expobiome_smorf_02875709					2.93538e+07	3					5.31178e+06	1	3.72835e+06	1			2.20167e+07	2			1.147e+07	2	1.96556e+06	1	9.39998e+06	2	1.13044e+07	1					2.2642e+08	4			5.40942e+07	3	4.13849e+07	3
expobiome_smorf_02875815			3.25759e+07	1					2.3457e+07	1											5.04139e+07	2			2.63439e+08	3			3.45658e+07	1			5.75063e+07	2															4.17748e+07
expobiome_smorf_02876003															1.26978e+07	1	1.55088e+07	1																									1.36312e+07	1
expobiome_smorf_02876232									8.19267e+06	1	1.48453e+07	1																					1.63191e+07	1											1.1112e+07	1	1.16279e+07	1
expobiome_smorf_02876233	3.57947e+08	2					1.12776e+08	1	1.68118e+08	2							2.71234e+08	2													1.40225e+08	1	3.07532e+08	3			1.08883e+08	2							6.16663e+08	4
expobiome_smorf_02876327			1.17802e+07	1	9.09584e+06	1	1.87183e+07	1					6.59855e+06	1	3.0825e+06	1			4.95933e+06	1							8.17231e+06	1			9.89933e+06	1	7.38261e+06	1	4.52084e+06	1			4.36833e+07	1			7.4175e+06	1
expobiome_smorf_02876401																																	1.00201e+07	1													9.33672e+06	1
expobiome_smorf_02876450	1.83416e+07	1											1.18125e+07	1	1.35036e+07	1											1.99084e+07	1			1.04595e+08	1			3.42129e+07	1			1.98071e+07	1			1.28488e+08	2			1.74372e+07	1	2.94172e+07
expobiome_smorf_02876741	4.62446e+07	3	1.10483e+08	4	4.00876e+07	3	5.45099e+07	3	6.39616e+06	1	1.14186e+08	5			1.85637e+07	1	3.85169e+08	4			2.29848e+07	1	5.00292e+07	3	1.08845e+08	4	2.77015e+07	2			2.48653e+07	2	5.51258e+07	4			5.12938e+07	2	3.25072e+07	3	9.97513e+07	5	2.59084e+07	2	7.13153e+07	3	7.21708e+06	1	1.60579e+08
expobiome_smorf_02876743																									4.89319e+06	1							2.81431e+06	1
expobiome_smorf_02876781	4.27961e+08	5	3.93468e+08	5			5.21292e+08	6							3.28462e+08	3			8.74045e+07	2	2.13833e+08	4			3.13568e+08	4	5.16637e+08	6					2.20345e+08	5	2.73634e+08	4			7.60466e+08	8			3.43512e+08	4	2.33032e+08	4	3.0749e+08	4
expobiome_smorf_02876787	1.53518e+08	4	8.39935e+07	4			1.31681e+08	3			8.57035e+07	3			7.97466e+07	3					7.35888e+06	1			1.0104e+08	4	1.8594e+08	4					3.62561e+07	2	7.64513e+07	3			1.39109e+08	3					3.60922e+07	2	7.35947e+07	3	1.7095e+08
expobiome_smorf_02876846	1.70953e+08	1	1.45514e+08	1											1.02572e+08	1									6.33463e+07	1					1.06256e+08	1							5.13422e+07	1			5.65175e+07	1
expobiome_smorf_02877144													1.07497e+08	3			1.7209e+07	1	1.67873e+07	1											1.65659e+07	1	2.35589e+07	1									1.31146e+07	1
expobiome_smorf_02877207							5.12984e+07	1	2.24529e+08	1					9.432e+07	1															7.89935e+07	1			1.29437e+07	1
expobiome_smorf_02877318																																	8.14175e+07	2
expobiome_smorf_02877432	2.08883e+08	3							3.01992e+08	4	3.26511e+08	5	7.82181e+08	5	2.1716e+07	2							1.62629e+08	4			1.15699e+08	3			3.19667e+08	4	4.33369e+07	2	4.4667e+07	2									3.651e+07	2
expobiome_smorf_02877602	4.71611e+07	3							1.12255e+08	4	5.23182e+08	12	4.11208e+08	6	5.92703e+07	1	7.97267e+08	7	2.23672e+08	5	1.63363e+08	4	1.6501e+08	4			1.3664e+08	3	9.8365e+07	3	4.4591e+08	6	4.21053e+08	7	1.52337e+08	4	5.85531e+08	6	3.27846e+08	9	4.40026e+08	5	1.37247e+08	3	3.71437e+07	2	1.79128e+07	1	3.76025e+08
expobiome_smorf_02877888	3.04741e+07	1					6.15623e+07	1																									2.25873e+07	1					6.53369e+07	1									1.16857e+08
expobiome_smorf_02877894			5.6066e+07	1			1.44312e+08	1			6.92419e+07	1			4.16029e+07	1			1.21749e+07	1	4.33285e+07	1			6.0725e+07	1	7.71578e+07	1					4.12628e+07	1	6.79342e+07	1			1.20881e+08	1			4.46508e+07	1	7.42964e+07	1	3.97704e+07	1
expobiome_smorf_02877934																																	1.01533e+07	1			2.48135e+07	1			3.9626e+07	2
expobiome_smorf_02877958			3.97394e+07	1							5.45408e+07	1									7.37182e+06	1			2.11965e+07	1							6.41188e+07	1			1.42936e+07	1							3.19002e+07	1
expobiome_smorf_02878276					1.71941e+07	1					1.72882e+07	2									1.05723e+07	1											1.67866e+07	1	1.301e+07	1	8.04937e+06	1			6.69587e+07	2			2.6712e+07	1			2.25284e+07
expobiome_smorf_02878280	9.81906e+07	2			1.38958e+08	2			3.56317e+07	1	5.0736e+08	4					1.06372e+08	3	2.08594e+08	3			2.1993e+08	2	7.18199e+07	2	1.59996e+08	2			2.49251e+08	2	2.40724e+08	3	1.0246e+08	2	1.62689e+08	2	3.94471e+07	1	1.46105e+08	1			2.68407e+07	1	3.83708e+07	1	5.28433e+07
expobiome_smorf_02878457																							1.42831e+07	1			1.2879e+07	1			1.12678e+07	1	1.39524e+07	1													2.79442e+07	1
expobiome_smorf_02878633			1.08251e+07	1			5.18347e+07	2			7.2716e+07	2					1.10728e+08	2	1.28859e+07	1			1.12792e+07	1			1.33455e+07	1			2.9061e+07	2	1.74237e+07	1									4.17991e+06	1
expobiome_smorf_02878643					2.32648e+07	1			1.61993e+07	1							6.60655e+07	1					7.18537e+06	1									5.01509e+07	1	1.30579e+07	1	1.74494e+07	1					1.32292e+07	1	4.19356e+07	1	2.86063e+07	1	1.8278e+07
expobiome_smorf_02878711																																	2.40717e+07	1
expobiome_smorf_02878866	6.97635e+07	2	1.22044e+08	2	3.46445e+07	1					5.87767e+07	2	6.27963e+07	3			1.28952e+08	3			3.57336e+07	1	8.52931e+07	2			8.51064e+07	2			1.2238e+08	2	2.15698e+07	1	6.94319e+07	2			1.40189e+07	1			6.42405e+07	2					5.63945e+07
expobiome_smorf_02878945	2.72991e+07	1	6.04637e+07	2					3.95282e+07	3			3.65447e+07	2									1.43888e+07	1									5.67898e+07	3
expobiome_smorf_02879340			4.63037e+07	2			7.09273e+07	2	1.04282e+07	1					8.80931e+06	1	1.21702e+08	1			4.99547e+07	2	8.7272e+07	2							7.98811e+06	1	1.88698e+08	3			1.69877e+07	1	4.00215e+07	2			7.31206e+07	2					6.30525e+07
expobiome_smorf_02879444	1.10858e+08	2	1.65085e+08	2	8.49363e+07	2			6.521e+07	2			6.0964e+07	2			1.37858e+07	1			2.61791e+07	2	8.20332e+07	2	1.87933e+08	2	1.14781e+08	2			2.53314e+08	2	5.14309e+07	2	1.25688e+08	2	1.17064e+08	2	5.29742e+07	2					2.35434e+08	2	4.89126e+07	2	1.79513e+08
expobiome_smorf_02879497	1.40737e+07	1									1.15063e+07	1	1.38063e+07	1			9.71184e+07	3							1.98332e+08	4	3.54583e+07	1					1.36716e+08	4	5.53374e+07	2							3.77256e+07	1	2.67547e+08	3
expobiome_smorf_02879626	3.87116e+07	2	8.67202e+07	2																	8.20949e+07	2	1.06914e+08	2	1.81648e+08	5					4.55009e+07	2	1.05451e+08	3	4.16815e+07	2	1.10357e+07	1	1.07817e+07	1					5.0059e+07	2	4.77666e+07	2	1.65686e+07
expobiome_smorf_02879895			8.96168e+07	2			1.5452e+07	1					6.79732e+07	1	1.16868e+08	1	7.01757e+07	1			1.00797e+07	1	3.01987e+07	1	5.88245e+07	1	1.05758e+08	1					9.47013e+06	1	8.02985e+07	1	1.6362e+07	1	1.21053e+08	1	3.58631e+07	1	9.18099e+07	1
expobiome_smorf_02880012																																	7.73732e+06	1
expobiome_smorf_02880105							4.49262e+07	1																							8.22958e+07	1
expobiome_smorf_02880227																																	8.95677e+06	1
expobiome_smorf_02880427							1.39864e+07	1																					1.3049e+07	1			1.29465e+07	1					2.33512e+07	1
expobiome_smorf_02880438																			7.96508e+07	1													6.76304e+07	1
expobiome_smorf_02880804	1.50425e+07	1											2.84061e+07	1			4.92727e+07	1			2.27611e+07	1	1.56584e+07	1			1.24799e+07	1					3.19231e+07	1			1.84054e+07	1											3.58928e+07
expobiome_smorf_02881020																																	7.47359e+07	3
expobiome_smorf_02881148	4.9367e+06	1			4.06087e+06	1							1.56486e+07	1					6.58385e+07	2													3.19577e+06	1			1.81676e+07	1			9.90912e+06	1	2.12184e+06	1	3.02326e+06	1	1.75403e+06	1
expobiome_smorf_02881516																																	3.44959e+06	1
expobiome_smorf_02881677					2.10127e+07	1																											2.25995e+07	1											1.62134e+07	1
expobiome_smorf_02881793					9.40256e+07	2															1.51221e+07	2	2.37466e+07	2	7.40206e+06	1	6.61959e+06	1					5.24765e+07	4	4.09691e+07	3			3.49495e+07	3	1.24086e+08	4			1.41622e+08	4			7.50394e+07
expobiome_smorf_02881823																	4.60268e+07	1															1.63838e+07	1											1.8617e+07	1
expobiome_smorf_02881828			4.45877e+07	1			3.44244e+07	2	2.20945e+07	1	1.41354e+08	3	6.28517e+06	1	1.5091e+07	1	1.25772e+08	4	1.1191e+07	2			4.11332e+07	2					1.16651e+07	1			3.09077e+08	5			2.64859e+07	2	5.02829e+07	3	6.47873e+07	4	2.82617e+07	1	1.49787e+08	5	6.40682e+07	2
expobiome_smorf_02881905	9.77744e+07	2	2.99176e+08	4	3.48104e+07	2			6.96247e+07	2	1.81423e+08	3	4.10952e+07	2					3.46839e+07	2	1.62445e+07	1	2.298e+07	1	2.1097e+07	1	2.60405e+07	2			5.32292e+07	2	1.17907e+08	3	8.55263e+07	2			3.79573e+07	2	8.95717e+07	2	2.66686e+07	2	6.43155e+07	2	1.96282e+07	1	3.95162e+07
expobiome_smorf_02882148															1.34687e+07	1																	4.21576e+07	1							1.07452e+07	1							1.07384e+07
expobiome_smorf_02882532			3.80311e+07	2					3.03213e+07	2			9.61349e+07	3									9.86068e+06	1							8.17179e+06	1	1.45666e+07	1											4.15799e+07	2
expobiome_smorf_02882534											3.15033e+07	1																					3.17037e+07	1											5.57671e+07	1
expobiome_smorf_02882537			1.16493e+08	2					2.69278e+07	2											2.58614e+07	2	3.85923e+07	2									1.11673e+08	4	1.5808e+07	1					6.76283e+07	3	1.0212e+07	1	8.08606e+07	2
expobiome_smorf_02882679	1.59951e+07	1																					1.61428e+07	1									1.7088e+07	1	1.69504e+07	1
expobiome_smorf_02882807			5.81207e+08	2							1.10216e+08	2	1.49844e+08	2									7.00777e+07	1							1.00576e+08	2	4.28191e+08	2	9.49322e+07	2					2.43415e+08	2			3.26299e+07	1			4.89575e+07
expobiome_smorf_02883020	3.23604e+08	1	3.18439e+08	1	2.55955e+07	1	3.18731e+08	1	6.33237e+08	1	2.06201e+08	1	1.57767e+08	1	2.93404e+08	1	4.80514e+08	1			6.01721e+08	1	1.15937e+08	1	2.13283e+08	1	3.86327e+08	1			4.93334e+08	1	6.31944e+08	1	2.33209e+08	1	1.92566e+08	1	3.72454e+08	1	3.70773e+08	1	3.41596e+08	1	7.26563e+07	1	3.22124e+08	1	3.67864e+08
expobiome_smorf_02883036	1.44115e+07	1	9.99692e+07	2							2.03088e+06	1					3.55799e+07	3															3.78361e+07	1					2.24383e+07	1	3.38943e+07	1			1.09871e+08	2
expobiome_smorf_02883055	4.16346e+07	1					1.03763e+07	1			3.97046e+07	1					2.00249e+07	1	1.15618e+07	1	1.76748e+07	1	2.3295e+07	1	8.97536e+06	1	4.53086e+06	1			7.30592e+06	1	4.47414e+07	1	1.37482e+07	1	3.23986e+07	1			3.21655e+07	1	2.06767e+07	1	3.40656e+07	1
expobiome_smorf_02883125																																	3.75929e+07	1
expobiome_smorf_02883229											2.97423e+07	1	4.10381e+07	2																	3.68811e+07	1	1.47881e+07	1									4.1851e+07	2
expobiome_smorf_02883236	4.5872e+07	1					1.52111e+07	1	8.26719e+07	2	3.02191e+08	4	3.87072e+08	5	3.51611e+07	2	5.17316e+07	2					2.76831e+07	1			7.93921e+07	2			3.1574e+08	4	1.56305e+08	3	5.25132e+07	2					6.25459e+07	2	2.77034e+08	3	2.74401e+07	1
expobiome_smorf_02883237	2.20254e+07	1									1.54273e+08	2	5.91697e+07	1			9.67297e+06	1					2.48944e+07	1			3.04757e+07	1			1.10115e+08	1	6.01378e+07	1	9.52793e+06	1					1.45917e+07	1	9.37501e+07	1	1.29542e+07	1
expobiome_smorf_02883351			2.70731e+06	1					1.15528e+07	1	7.67748e+06	1											1.32647e+07	1	1.66195e+07	1	9.87802e+06	1			7.60961e+06	1	8.23326e+06	1	4.20256e+06	1	1.00003e+07	1			1.45088e+07	1			6.34272e+06	1
expobiome_smorf_02883563					7.19039e+06	1																			4.12115e+07	3							1.61488e+08	4	1.30273e+08	4									5.47867e+07	4	1.18309e+07	1
expobiome_smorf_02883566	2.41659e+07	1	3.80239e+07	1					1.52538e+07	1					9.16521e+06	1									1.62998e+07	1	1.72752e+07	1			1.11301e+08	2	6.79376e+07	2	3.58782e+07	1					1.90248e+07	1					2.09557e+07	1	6.89205e+06
expobiome_smorf_02883567															3.19716e+07	1																	1.75465e+07	1
expobiome_smorf_02883579	6.45853e+07	2	9.85833e+07	2																											1.44692e+08	2							1.0127e+08	4					6.95406e+07	2
expobiome_smorf_02883634					9.31006e+06	1											1.67284e+07	1															1.86545e+07	1			2.43461e+07	2
expobiome_smorf_02884289	1.24312e+08	1									1.1458e+07	1											1.45187e+07	1							4.1701e+08	2	2.60465e+08	2	1.68352e+07	1	9.57745e+06	1			2.8989e+07	1	2.01807e+07	1	1.86235e+07	1	1.10569e+07	1
expobiome_smorf_02884333			6.79849e+07	2							3.78193e+07	2					1.34504e+07	2					1.32291e+08	3	2.73298e+08	4	5.33069e+07	2			5.82413e+07	2	4.35437e+07	2	3.68144e+07	2							3.10799e+07	2			2.92756e+07	2
expobiome_smorf_02884783																											3.30481e+06	1					6.82823e+06	1									5.99688e+06	1
expobiome_smorf_02884786																							1.18291e+07	1									1.10634e+07	1
expobiome_smorf_02884850					8.05261e+06	1													4.5127e+06	1			1.51089e+07	1									1.22756e+07	1			8.88549e+06	1	6.28875e+06	1					7.90068e+06	1
expobiome_smorf_02885240	1.56232e+08	1	1.22319e+08	1			2.24096e+08	1			4.08425e+07	2			1.92915e+08	1					9.60751e+06	1			2.55419e+08	1	6.42065e+06	1					8.29771e+06	1	1.97947e+08	1			3.23026e+07	1			1.29069e+08	2			6.463e+06	1	2.02626e+06
expobiome_smorf_02885241			3.55634e+07	2			1.09129e+08	3			5.63461e+07	2			1.93644e+07	1									2.73111e+07	2	1.42043e+08	5					1.17247e+07	1	5.80514e+07	2			9.19829e+07	4			5.02801e+07	2	1.17466e+07	1			2.01037e+08
expobiome_smorf_02885283	5.37005e+07	1																			1.5409e+07	1											2.35385e+07	2					1.49403e+07	1									7.85809e+06
expobiome_smorf_02885324			1.7144e+07	1	2.26257e+07	1											1.47777e+07	1															1.27764e+07	1
expobiome_smorf_02885381	9.46506e+08	9	7.32494e+08	5			9.31842e+08	7			1.00183e+09	7			4.50288e+08	4			1.63227e+08	3	2.56337e+08	5			5.89429e+08	6	1.02353e+09	8					5.29457e+08	8	9.42181e+08	8			1.46798e+09	8			1.04144e+09	7	3.11409e+08	5	4.2173e+08	4
expobiome_smorf_02885384	2.34633e+08	2	7.4153e+07	1			1.06769e+08	2			1.06498e+08	2			8.25727e+07	1					5.01136e+07	1			6.20723e+07	1	8.82953e+07	1					9.05955e+07	1					3.44633e+08	2			1.35001e+08	2	5.67115e+07	2	6.50082e+07	1
expobiome_smorf_02885509	1.24268e+07	1	1.61577e+07	1							4.66782e+07	2					1.47451e+08	3									2.15118e+07	1					4.97368e+07	3	1.52923e+07	1	2.11092e+07	1							2.69785e+07	1
expobiome_smorf_02885557																																	6.50552e+06	1
expobiome_smorf_02885653	1.78441e+07	1	1.28079e+07	1									1.19914e+07	1			4.94325e+07	2	7.62584e+06	1													1.0365e+07	1											9.20127e+06	1
expobiome_smorf_02885922					3.72914e+07	1
expobiome_smorf_02886017																																	4.28019e+06	1
expobiome_smorf_02886190																																	3.40412e+07	1															3.13785e+07
expobiome_smorf_02886464																																	1.53851e+08	3			2.64828e+07	1
expobiome_smorf_02976010
expobiome_smorf_03001464																																	5.09879e+07	2
expobiome_smorf_03042616																																	1.63557e+07	1
expobiome_smorf_03175781																															1.60815e+07	1
expobiome_smorf_03176670													5.16819e+06	1	1.66518e+07	1															7.56313e+06	1
expobiome_smorf_03183247													2.89752e+07	1																			6.22092e+07	1															1.46577e+07
expobiome_smorf_03183250																																	2.06373e+07	1															3.8126e+07
expobiome_smorf_03187996																																	2.62409e+07	1
expobiome_smorf_03195344																																	3.91256e+08	5
expobiome_smorf_03197546													2.50793e+07	1																			1.40605e+08	2									6.79041e+06	1
expobiome_smorf_03198977
expobiome_smorf_03211163													2.33492e+07	1																			3.11673e+07	1
expobiome_smorf_03220783													1.29812e+07	1																			8.96213e+06	1
expobiome_smorf_03222191																																	5.92764e+07	2
expobiome_smorf_03278247																																	7.0406e+06	1
expobiome_smorf_03512330																																	7.71938e+06	1
expobiome_smorf_03622213																																	9.06672e+06	1
expobiome_smorf_03918715																																	1.33859e+07	2
expobiome_smorf_03923760																																	7.3881e+07	2
expobiome_smorf_03935851																																	8.89829e+06	1
expobiome_smorf_03945250																																	5.88761e+07	1
expobiome_smorf_03946186																																	2.76049e+07	1
expobiome_smorf_03977685																																	1.33783e+07	1
expobiome_smorf_04015944																																	2.47206e+08	3
expobiome_smorf_04054648																															1.06742e+09	6									7.14531e+08	5
expobiome_smorf_04062976																															7.60271e+08	6
expobiome_smorf_04156243																																	3.19721e+06	1
expobiome_smorf_04182603																																	5.4796e+06	1
expobiome_smorf_04304596																																	4.6318e+06	1
expobiome_smorf_04421604
expobiome_smorf_04424152
expobiome_smorf_04533502																																	1.28802e+07	1
expobiome_smorf_04569099																																	2.33666e+07	1
expobiome_smorf_04739326																																	1.2854e+07	1
expobiome_smorf_04848967																																	3.11017e+07	1
expobiome_smorf_04865371																																	1.69328e+07	1											2.45345e+07	1
expobiome_smorf_04871916																															4.93453e+07	1
expobiome_smorf_04881287
expobiome_smorf_05012433																																	2.30257e+07	1
expobiome_smorf_05442685																																	7.75928e+06	1
expobiome_smorf_05470389
expobiome_smorf_05587472																															4.66088e+08	3
expobiome_smorf_05589114																																									9.29651e+06	1
expobiome_smorf_05592463
expobiome_smorf_05594117
expobiome_smorf_05597529
expobiome_smorf_05599411																															1.32428e+08	1
expobiome_smorf_05599987																															1.62303e+07	1
expobiome_smorf_05600593
expobiome_smorf_05603701																															2.15724e+07	1
expobiome_smorf_05605736
expobiome_smorf_05606253
expobiome_smorf_05606731
expobiome_smorf_05609498
expobiome_smorf_05613090
expobiome_smorf_05614080
expobiome_smorf_05615581
expobiome_smorf_05615694
expobiome_smorf_05617523
expobiome_smorf_05617891
expobiome_smorf_05619644																															1.73924e+08	2
expobiome_smorf_05619872
expobiome_smorf_05620696
expobiome_smorf_05627167																															1.56101e+07	2
expobiome_smorf_05627319																															1.06307e+08	3
expobiome_smorf_05631701
expobiome_smorf_05632311																															9.92014e+07	2
expobiome_smorf_05633386
expobiome_smorf_05634255																															6.51348e+06	1
expobiome_smorf_05634321
expobiome_smorf_05636020
expobiome_smorf_05637226
expobiome_smorf_05637786																															3.45799e+07	1
expobiome_smorf_05638798
expobiome_smorf_05638887
expobiome_smorf_05640174																															1.0641e+08	2
expobiome_smorf_05640863
expobiome_smorf_05643027
expobiome_smorf_05644239
expobiome_smorf_05646393
expobiome_smorf_05646663
expobiome_smorf_05646901																															3.02296e+08	5
expobiome_smorf_05648503																															2.23187e+07	1
expobiome_smorf_05649025
expobiome_smorf_05651088
expobiome_smorf_05746459																																					1.19322e+08	4			3.04347e+07	2
expobiome_smorf_05767550																															1.59441e+08	2
expobiome_smorf_05788076																							5.40859e+06	1									1.0299e+07	1
expobiome_smorf_05796125																	1.31566e+07	1													1.3083e+08	2
expobiome_smorf_05799408
expobiome_smorf_05800100									1.92715e+07	1																							1.39582e+07	1
expobiome_smorf_05811830									4.73585e+07	1											2.71538e+06	1											6.63667e+07	1
expobiome_smorf_05823148
expobiome_smorf_06009014											2.97076e+08	2					1.74853e+08	2			4.22972e+07	1											1.64915e+08	2					3.41257e+07	1			8.06116e+07	2
expobiome_smorf_06013707																																	8.04713e+07	3
expobiome_smorf_06023609																																	6.84828e+07	3													4.00741e+07	2	4.41471e+08
expobiome_smorf_06025435													1.63645e+07	1													8.78182e+06	1					1.33377e+07	1											7.36634e+06	1	7.5956e+06	1
expobiome_smorf_06030262													2.81856e+07	2																			7.44822e+07	3															3.85072e+07
expobiome_smorf_06038889																																	1.28663e+07	1
expobiome_smorf_06039482					1.48823e+07	1					2.16472e+06	1											4.39782e+06	1			3.49639e+06	1					5.31357e+07	2	6.702e+07	2							4.02017e+07	2	1.55862e+07	1	1.13842e+07	1
expobiome_smorf_06040923																																	7.20133e+06	1
expobiome_smorf_06047910																																	1.10953e+07	1
expobiome_smorf_06048050											7.70769e+07	3																			4.08163e+07	1	3.00163e+07	2													1.5354e+07	1
expobiome_smorf_06051774																																	7.41879e+06	1													1.37597e+07	2
expobiome_smorf_06052983																																	1.14182e+07	2			6.76649e+06	1							3.7352e+07	1
expobiome_smorf_06053395																																	1.45549e+07	2
expobiome_smorf_06053563							1.38428e+07	1			2.04937e+08	5																					5.09565e+07	3							1.30943e+08	4					1.65166e+08	2
expobiome_smorf_06057848															1.04923e+07	1					7.06805e+07	2	3.32516e+07	1			5.58732e+07	1	2.16645e+07	1			3.97423e+07	2					3.857e+07	1	4.82145e+07	1			3.27636e+07	1			6.14417e+07
expobiome_smorf_06058654																																	2.81804e+07	1
expobiome_smorf_06060128																																	3.61928e+06	1
expobiome_smorf_06071554					1.58159e+07	1													4.81638e+07	2	1.67908e+07	1					2.05226e+08	3					3.37422e+07	2			2.47228e+08	4									9.15406e+06	1	6.83561e+07
expobiome_smorf_06072233							3.09213e+07	1																	1.7943e+08	2							2.45432e+08	2											8.79543e+07	1
expobiome_smorf_06343018
expobiome_smorf_06355869																																	6.28313e+06	1
expobiome_smorf_06371643																																	2.91881e+07	1
expobiome_smorf_06384147																															7.48575e+07	1							2.33216e+07	1
expobiome_smorf_06385638																																	1.789e+07	1
expobiome_smorf_06568890																																	1.64231e+07	1							4.87728e+06	1
expobiome_smorf_06570116																																	9.97581e+06	1
expobiome_smorf_06665241																																	2.57226e+07	2
expobiome_smorf_06776954
expobiome_smorf_06778117											9.19322e+07	4																					8.24841e+07	2
expobiome_smorf_06779040																																	3.50175e+07	1
expobiome_smorf_06790650																															4.39685e+06	1	5.51838e+06	1
expobiome_smorf_06812799											1.49478e+07	1	1.94432e+07	1									2.78405e+07	1	3.95163e+07	2							4.04499e+08	4	1.2117e+07	1			6.3674e+07	1	5.77479e+07	2
expobiome_smorf_06840353																																	2.63122e+07	1
expobiome_smorf_06841795																																	1.89955e+07	1							1.08252e+07	1
expobiome_smorf_06841841																															9.72532e+06	1
expobiome_smorf_06841945							3.33997e+07	2	1.76744e+07	2	2.41198e+07	2					8.20617e+06	1					7.05727e+06	1							7.91972e+06	1	8.20733e+07	4											1.18438e+07	1	6.11018e+06	1
expobiome_smorf_06842959																																	1.23487e+07	2
expobiome_smorf_06843707																																	4.77172e+06	1
expobiome_smorf_06844276																	6.7637e+07	2															1.73605e+07	1
expobiome_smorf_06846305									2.28599e+07	1	1.86801e+07	1	1.96071e+07	1									1.9057e+07	1			1.75852e+07	1					2.37258e+07	1											2.3165e+07	1
expobiome_smorf_06853336									1.37515e+07	1																							6.92227e+06	1
expobiome_smorf_06853635					2.87262e+08	3	1.65793e+08	2			6.5571e+07	2			1.22062e+08	1	5.5993e+08	1			7.50021e+07	2	3.18402e+07	2	1.84476e+08	2	3.96059e+07	1	1.67949e+07	1	3.09507e+07	1	1.69185e+08	3	4.895e+07	2	2.5307e+07	1	5.5803e+07	1	7.05562e+08	3	1.30305e+07	1	2.49124e+07	1	4.27326e+08	3	1.43141e+08
expobiome_smorf_06853699																																	7.88906e+06	1											8.92581e+06	1
expobiome_smorf_06858240													1.30175e+08	1			9.87108e+06	1															2.85828e+07	1
expobiome_smorf_06858559																							1.44194e+07	1			2.64874e+07	1					2.3377e+07	2
expobiome_smorf_06860164																																	6.22115e+06	1
expobiome_smorf_06862885					3.41044e+07	1	2.31848e+07	1	1.7206e+07	1	1.78775e+08	2	1.83683e+08	3	1.88297e+08	3	1.69841e+08	3			3.39609e+07	2			1.96085e+08	3	1.60502e+08	1	1.6207e+07	1			1.92822e+07	1			1.09104e+08	2					7.35515e+07	1	6.12041e+06	1			1.321e+07
expobiome_smorf_06865822									2.3536e+07	1													3.15975e+07	2			2.76155e+07	1					5.8875e+07	2											3.65483e+07	2
expobiome_smorf_06866713																																	8.29008e+06	1
expobiome_smorf_06868066													6.25254e+06	1																			1.45963e+07	1
expobiome_smorf_06869499																																	3.68244e+06	1
expobiome_smorf_06869775							2.56627e+07	2			2.99569e+07	1							2.59129e+07	2			6.1039e+06	1							1.69026e+07	1	1.11215e+07	2							2.57435e+07	2			2.8911e+07	2
expobiome_smorf_06870223							3.1476e+07	1			8.51756e+07	3					1.11972e+08	3					2.53835e+07	2									4.21291e+07	3					4.13633e+06	1							2.82483e+07	2
expobiome_smorf_06870744																															5.53298e+07	1	9.81536e+07	1							4.6423e+07	3			1.18248e+08	1
expobiome_smorf_06878471					2.64018e+08	3	7.72985e+07	1			5.75357e+08	4			6.80922e+08	2									5.62082e+08	2	1.59263e+08	1			2.53486e+08	2			8.61698e+07	2	1.57412e+07	1	8.7687e+07	1	3.44338e+08	2					1.98417e+09	4	1.65359e+08
expobiome_smorf_06878481					1.81825e+08	2	4.19973e+07	1			2.91028e+08	2			8.57549e+08	2	1.15204e+08	1			3.53324e+08	3			7.2568e+08	4	3.44305e+08	4			1.34603e+08	2			1.03161e+08	3			2.63324e+08	3			3.23663e+07	2			1.52983e+09	5	3.2543e+07
expobiome_smorf_06880349																																	4.1641e+07	1
expobiome_smorf_06880817																	4.81313e+07	1													2.11635e+07	1	2.68442e+07	1					7.97198e+06	1					3.7003e+07	1
expobiome_smorf_06880917																															5.41248e+07	1	9.22931e+06	1	1.63947e+07	1
expobiome_smorf_06881185					1.7062e+07	1			1.57818e+07	1																							2.11377e+07	1			4.56542e+07	1	5.63904e+07	1
expobiome_smorf_06881710																																	4.76042e+06	1
expobiome_smorf_06937042																															5.57653e+08	5
expobiome_smorf_07030453									6.54987e+06	1											5.41367e+06	1									1.65809e+07	1	2.35796e+06	1									8.09711e+06	1	9.69609e+06	1
expobiome_smorf_07030756					4.30942e+07	1			1.10236e+07	1			1.17271e+07	1																	3.07322e+07	1	3.29355e+07	1											1.90307e+07	1	2.94981e+07	1
expobiome_smorf_07034184					2.88033e+07	1															2.82844e+07	1											1.57281e+07	1											5.37255e+07	1
expobiome_smorf_07034394					5.34302e+07	1															4.59839e+07	1											6.03105e+07	1	6.84894e+07	1			3.94533e+07	1					1.68719e+08	2			4.37026e+07
expobiome_smorf_07035559					1.92887e+07	1					2.62637e+07	1																					9.74935e+07	1							2.86833e+07	1
expobiome_smorf_07038363																			8.69554e+06	1	2.14533e+08	2			1.65219e+08	1							1.41295e+08	2							1.98706e+08	2
expobiome_smorf_07039038																																	1.0661e+07	1
expobiome_smorf_07039545																															2.05551e+07	1	2.17187e+07	1									1.8618e+07	1			1.20398e+07	1
expobiome_smorf_07040702									1.74508e+07	1															3.02515e+07	1							2.0781e+07	2
expobiome_smorf_07040717																																	1.04143e+07	1
expobiome_smorf_07041945																																	8.57285e+07	3					1.78013e+07	1
expobiome_smorf_07042225											4.03078e+07	2	6.42187e+07	3													1.99226e+08	5					2.07724e+08	6
expobiome_smorf_07044994																																	6.37546e+06	1
expobiome_smorf_07046120																																	9.46716e+06	1
expobiome_smorf_07047157																																	2.77176e+07	1													2.79859e+08	6	9.22346e+07
expobiome_smorf_07047563															4.05249e+07	1																	6.30022e+07	2			3.39016e+07	1	3.56536e+07	1							4.59108e+07	1	1.33509e+08
expobiome_smorf_07048671																																	8.86553e+06	1											2.26203e+07	1
expobiome_smorf_07050815																																	1.42711e+07	1
expobiome_smorf_07053135																																	6.0813e+07	1
expobiome_smorf_07053739																	1.14018e+07	1															9.02474e+06	1
expobiome_smorf_07054075																																	5.61723e+06	1
expobiome_smorf_07055787					3.48123e+06	1											6.95565e+06	1															1.27304e+07	1			1.12938e+07	1
expobiome_smorf_07055788													1.46038e+07	1									1.65932e+07	1	1.01862e+07	1							1.86499e+08	1					7.15397e+07	2	4.40831e+07	1
expobiome_smorf_07057415																																	2.10898e+07	1
expobiome_smorf_07057757																																	3.63381e+07	1					2.27579e+07	1							1.95809e+07	1	3.68186e+07
expobiome_smorf_07057993																																	1.97143e+07	1
expobiome_smorf_07057994																																	6.51313e+06	1															7.5232e+06
expobiome_smorf_07059651					4.8628e+07	1	6.02541e+07	1															9.35288e+07	2																	8.16322e+07	1	5.94044e+07	1			5.90665e+07	1
expobiome_smorf_07060104																																	1.38652e+07	1
expobiome_smorf_07060280																																	1.25549e+07	1	4.37633e+07	1
expobiome_smorf_07060607											1.71906e+07	1									9.25659e+07	3	4.00384e+07	1	5.63674e+07	2			3.98203e+07	2			1.36893e+08	4	1.88111e+08	3			6.89715e+07	1							9.13503e+07	2
expobiome_smorf_07062350							8.7054e+06	1	8.52051e+06	1	1.45395e+07	1					1.36053e+07	1															1.62193e+07	1	1.51907e+07	1					1.18318e+07	1					1.08294e+07	1	1.3914e+07
expobiome_smorf_07062774																																	6.96845e+06	1
expobiome_smorf_07064132																	6.20682e+07	1															9.96332e+06	1	1.03059e+07	1			2.15212e+07	1	1.36421e+08	2
expobiome_smorf_07064162					4.01398e+07	1															5.6318e+07	1	6.16308e+07	1			4.60102e+07	1			6.26959e+07	1					2.43481e+07	1	2.49931e+07	1			4.61628e+07	1
expobiome_smorf_07067350																																	2.81872e+07	2	3.01206e+07	2
expobiome_smorf_07068142																																	1.2466e+07	1
expobiome_smorf_07073177															5.0821e+07	2																	4.78174e+06	1			1.7492e+07	2	5.30255e+07	2							3.38631e+07	2	8.76505e+07
expobiome_smorf_07074752																																	2.04532e+07	1
expobiome_smorf_07074911					3.39308e+07	1			6.23305e+07	1																					4.03295e+07	1					2.72335e+07	1							7.17406e+06	1
expobiome_smorf_07075182																																	8.48171e+06	1
expobiome_smorf_07076627																	2.4579e+07	1									1.18365e+07	1					8.13787e+07	3					1.26842e+07	1	1.46055e+07	1
expobiome_smorf_07078233																																	1.25237e+07	2
expobiome_smorf_07079632													1.86765e+07	1											1.24845e+07	1							7.66372e+07	2
expobiome_smorf_07097330																																	1.40061e+07	1
expobiome_smorf_07469206																																	1.26338e+07	1
expobiome_smorf_07474691																																	7.64668e+07	2
expobiome_smorf_07474692																																	1.01541e+07	1
expobiome_smorf_07482579																					1.56727e+07	1																					4.42866e+07	1
expobiome_smorf_07488798															9.7841e+06	1																	7.06743e+07	4			4.38754e+07	2
expobiome_smorf_07497379																																	6.2587e+07	3
expobiome_smorf_07501078																															2.8718e+07	1
expobiome_smorf_07501430																																	3.83623e+07	2
expobiome_smorf_07512462																																	1.54433e+07	1
expobiome_smorf_07513427																																	1.97172e+07	1
expobiome_smorf_07514317																																	4.44041e+07	2
expobiome_smorf_07516614																																	2.80476e+07	1
expobiome_smorf_07520029
expobiome_smorf_07520191																																	1.08513e+08	2
expobiome_smorf_07531009																																	4.36918e+07	1
expobiome_smorf_07551996																																	7.71846e+06	1
expobiome_smorf_07592055																															1.18913e+08	4							1.08654e+08	4
expobiome_smorf_07948121																			1.08543e+08	2							2.37057e+07	2					1.83631e+07	1
expobiome_smorf_07972921																																	1.03585e+07	1
expobiome_smorf_08032316																																	5.63461e+07	2
expobiome_smorf_08068065																																	3.43484e+06	1
expobiome_smorf_08100645
expobiome_smorf_08211188																																	9.57072e+06	1
expobiome_smorf_08292027
expobiome_smorf_08424526																																	6.57299e+06	1
expobiome_smorf_08457988																																	9.25676e+06	1
expobiome_smorf_08531705																																	2.99798e+07	1
expobiome_smorf_08537440																																	4.83006e+07	1
expobiome_smorf_08542684																																	7.79677e+06	1
expobiome_smorf_08576149																																	4.96685e+06	1
expobiome_smorf_08761912																															1.32141e+07	1	3.44128e+07	1									2.13864e+07	1
expobiome_smorf_08761968																							6.21637e+07	2									1.88906e+08	3							3.97942e+08	3
expobiome_smorf_08764465																					2.97187e+07	2	1.36526e+08	2							6.50166e+07	2	9.06406e+07	2									6.75531e+07	2
expobiome_smorf_08767102											1.61477e+07	1																					2.87513e+07	2
expobiome_smorf_08768076																																	8.92089e+07	2
expobiome_smorf_08768828																							2.0055e+08	3									3.22875e+08	3							2.95743e+08	3
expobiome_smorf_08769465																																	1.07931e+08	2
expobiome_smorf_08771362																																	1.21755e+07	1
expobiome_smorf_08772504																					1.92727e+07	2	7.36637e+08	7							1.79466e+08	4
expobiome_smorf_08773634																							1.54083e+07	1							1.50888e+07	1	8.29045e+06	1									8.14125e+06	1
expobiome_smorf_08775572																																	4.40723e+07	1
expobiome_smorf_08775979																																	3.16223e+07	1
expobiome_smorf_08776814																																	2.34684e+08	2
expobiome_smorf_08776863																															2.18585e+08	3									1.75307e+08	4							9.49891e+07
expobiome_smorf_08777481																																	1.78973e+08	4
expobiome_smorf_08779071																	2.27362e+07	2									5.44816e+06	1					5.81324e+06	1
expobiome_smorf_08779208
expobiome_smorf_08779428																															1.2829e+09	6									3.18386e+08	5							2.80543e+08
expobiome_smorf_08780748																																	3.36417e+08	2
expobiome_smorf_08782039																																	2.91238e+08	3
expobiome_smorf_08782358					2.11996e+07	2					1.20658e+07	1																					1.49557e+07	2
expobiome_smorf_08782695											6.04386e+07	1																			1.59192e+08	2
expobiome_smorf_08782997																																	1.47466e+07	1
expobiome_smorf_08788557																																	3.72474e+07	1
expobiome_smorf_08790489											3.01398e+07	1											2.50255e+08	2							1.27364e+08	2	8.44536e+07	1	2.17756e+07	1							1.28583e+08	2	2.01427e+07	1
expobiome_smorf_08793093																																	1.06554e+08	2
expobiome_smorf_08797241																																	3.77107e+08	4
expobiome_smorf_08797690																																	4.91248e+08	3
expobiome_smorf_08797691																																	1.2363e+07	1
expobiome_smorf_08798475											2.35366e+08	3					6.43813e+08	4															1.63538e+08	2											3.36383e+07	2
expobiome_smorf_08799536											2.6565e+07	1									4.30241e+07	1	1.95853e+08	2							1.61137e+08	2	1.81241e+08	2									3.23565e+08	2	2.45849e+07	1
expobiome_smorf_08800538																															1.7743e+09	6									3.29497e+08	3							4.91775e+07
expobiome_smorf_08801778																							3.66681e+07	1							7.4507e+07	3	1.07181e+07	1									3.21521e+07	2
expobiome_smorf_08802285							8.00467e+07	2					5.91431e+07	1																	4.59654e+07	1					4.24615e+07	1									1.72059e+07	1
expobiome_smorf_08803072											2.00202e+07	1					3.76834e+08	4															1.51859e+08	3											1.24598e+07	1
expobiome_smorf_08803767							1.38371e+07	1																									1.68909e+07	1													6.95107e+07	2
expobiome_smorf_08803853																	2.33819e+08	1															9.76249e+07	1
expobiome_smorf_08806962																																	5.15952e+06	1
expobiome_smorf_08807574											1.64444e+07	1							5.15736e+06	1
expobiome_smorf_08808010																																	4.31714e+07	2
expobiome_smorf_08809118																																	6.97765e+06	1
expobiome_smorf_08809579																															5.6833e+08	3									5.59365e+08	2							1.29993e+08
expobiome_smorf_08813043																																	5.7889e+06	1							2.33209e+07	2
expobiome_smorf_08813710																																	1.84712e+08	1
expobiome_smorf_08816090											9.49993e+06	1					4.41537e+07	1											6.33351e+07	1			1.30528e+08	1
expobiome_smorf_08817750																																	1.33229e+08	2
expobiome_smorf_08819869																							1.41187e+08	2																			9.21796e+07	2
expobiome_smorf_08826027																															2.64436e+07	1	6.13323e+07	2
expobiome_smorf_08826446
expobiome_smorf_08826447											5.50645e+07	2									1.69169e+07	1	3.01896e+08	3							1.55705e+08	2	5.27821e+07	2	1.81609e+07	1							1.7373e+08	2	2.01647e+07	1
expobiome_smorf_08826583																															9.33075e+07	1
expobiome_smorf_08827298
expobiome_smorf_08828143																																	3.6274e+07	1
expobiome_smorf_08829629																																	1.45708e+08	2
expobiome_smorf_08831179							1.90572e+07	1																			2.07199e+07	1					5.8168e+07	2
expobiome_smorf_08832196																					2.38054e+07	1	5.43174e+08	4							5.12069e+07	1	1.58588e+08	2									2.02559e+08	3	3.45707e+07	1
expobiome_smorf_08832591																															1.2297e+07	1			7.41892e+06	1			7.22617e+06	1
expobiome_smorf_08834156																																	3.09684e+08	5
expobiome_smorf_09323547																																	1.21571e+07	1
expobiome_smorf_09332243																																	8.88842e+07	3
expobiome_smorf_09352192																															6.41905e+07	1									3.82119e+07	1
expobiome_smorf_09352382																																	2.15487e+07	1											3.58865e+07	1
expobiome_smorf_09354390																																	3.80575e+07	2
expobiome_smorf_09354922																																	1.20635e+07	1
expobiome_smorf_09355229																			8.50153e+06	1	1.69429e+08	3					5.36799e+08	2			3.48855e+08	3			9.73372e+08	4	3.66843e+08	2	1.04156e+09	3	4.68813e+08	4							7.25165e+07
expobiome_smorf_09358539									5.66529e+06	1							9.11547e+06	1															5.66256e+07	2											1.28309e+07	2	2.16058e+07	3
expobiome_smorf_09358768
expobiome_smorf_09361418																							9.47047e+07	2									2.86105e+08	5									1.96066e+07	1
expobiome_smorf_09366950																							8.12075e+06	1									3.01381e+08	4
expobiome_smorf_09367556																							2.13083e+08	2									1.74621e+07	1
expobiome_smorf_09369057																							4.42046e+07	1									1.92585e+08	2
expobiome_smorf_09370304																	2.02699e+07	1															1.3456e+07	1											2.01084e+07	1	2.49982e+07	2
expobiome_smorf_09370312																							3.56411e+07	2									5.91542e+07	3
expobiome_smorf_09372549																																	1.24263e+07	1
expobiome_smorf_09374738															2.05421e+07	1																	3.44768e+07	1
expobiome_smorf_09375773															6.67228e+07	2																	1.10816e+08	5
expobiome_smorf_09375774																																	2.21836e+07	2
expobiome_smorf_09378715									1.48893e+08	1	4.94446e+07	1	4.68784e+07	1	3.44688e+07	1			2.18326e+07	1											2.82644e+07	1			6.77715e+07	1					1.30893e+07	1	5.13859e+07	1	5.75433e+07	1
expobiome_smorf_09379187																																	2.27097e+07	1
expobiome_smorf_09380476																			5.52571e+06	1													1.01177e+08	3	1.35457e+08	3			3.88639e+08	4
expobiome_smorf_09381665																																	3.14671e+06	1
expobiome_smorf_09393235
expobiome_smorf_09394477					4.91439e+07	1															1.07709e+07	1	1.62682e+07	1			9.27679e+06	1					2.21417e+07	1							2.30127e+07	1					9.46627e+06	1
expobiome_smorf_09396966																																	4.15627e+06	1
expobiome_smorf_09398368															1.11858e+07	1																	2.58851e+07	2
expobiome_smorf_09402286																															9.7488e+06	1
expobiome_smorf_09402669															1.81601e+07	1																	4.90677e+07	1
expobiome_smorf_09403919									1.68637e+08	1													1.26524e+07	1			4.00076e+07	1					8.04784e+07	2			3.74632e+07	2	4.62584e+07	2
expobiome_smorf_09406505					9.30316e+07	1											1.82549e+08	2									6.07674e+07	1			2.19996e+07	1	7.13915e+07	1							4.20789e+08	2
expobiome_smorf_09408869																																	5.6885e+07	1
expobiome_smorf_09409277											2.20692e+07	2													2.36995e+07	2							9.77078e+06	1					1.35169e+07	1
expobiome_smorf_09409808															2.48292e+07	1																	2.70423e+07	1
expobiome_smorf_09409810																																	2.09011e+07	1
expobiome_smorf_09410454																																	2.88478e+07	1
expobiome_smorf_09410458																							1.13946e+07	1									4.11074e+06	1
expobiome_smorf_09410464																									1.559e+07	1							1.206e+07	1
expobiome_smorf_09410819																																	1.72289e+07	1
expobiome_smorf_09414857									7.23659e+07	2																							1.74097e+07	1													8.2608e+07	2
expobiome_smorf_09414923																																	4.63488e+07	2
expobiome_smorf_09415348																																	1.90947e+08	2
expobiome_smorf_09416745																							2.00363e+07	1									1.42347e+07	1
expobiome_smorf_09416746																							6.26217e+07	1									1.4433e+08	3
expobiome_smorf_09416749																																	3.2027e+07	1
expobiome_smorf_09416750																																	9.17699e+07	2
expobiome_smorf_09417286
expobiome_smorf_09420808																																	2.07228e+07	1
expobiome_smorf_09422307																	2.10271e+07	1									3.57835e+07	1			6.54737e+07	1	4.00869e+06	1							1.20112e+08	1
expobiome_smorf_09422480																																	3.28765e+07	1
expobiome_smorf_09422481																																	1.50093e+07	1
expobiome_smorf_09422483																																	2.12682e+07	1
expobiome_smorf_09424160																																	1.6014e+07	1
expobiome_smorf_09424767																	3.03548e+07	1															5.08408e+07	2
expobiome_smorf_09425416																																	4.40754e+07	1
expobiome_smorf_09429923																																	1.1134e+07	1
expobiome_smorf_09536540
expobiome_smorf_09619288																																	6.54742e+06	1
expobiome_smorf_09637472																																	6.90766e+06	1									9.84621e+06	1
expobiome_smorf_09776125																															3.86729e+07	2
expobiome_smorf_09779600																																	8.78862e+07	4
expobiome_smorf_09802251																																	1.39337e+08	4
expobiome_smorf_09810197
expobiome_smorf_10025328																															3.15499e+07	2
expobiome_smorf_10167656											6.16767e+08	5																					1.51368e+08	3	4.01114e+08	5			7.04526e+08	6
expobiome_smorf_10168997									7.83408e+07	1																					1.37847e+08	2
expobiome_smorf_10170866																																	9.60502e+06	1
expobiome_smorf_10177377																																	1.16565e+07	1
expobiome_smorf_10178899																	7.44968e+06	1					6.687e+06	1									2.08279e+07	1							1.76258e+08	3
expobiome_smorf_10190604																																	1.5442e+07	1
expobiome_smorf_10191813																																	7.91658e+06	1			1.40626e+07	1
expobiome_smorf_10202120																																	1.34119e+07	1
expobiome_smorf_10482432																									1.83734e+08	2							9.17454e+06	1			2.92203e+07	1											1.26982e+07
expobiome_smorf_10485628																																	1.32707e+07	1
expobiome_smorf_10486583															4.6301e+07	1																	2.54016e+07	2
expobiome_smorf_10505030																															3.12347e+08	1
expobiome_smorf_10516609																															3.33516e+06	1
expobiome_smorf_10524283																	3.71919e+08	3					5.19553e+07	2									3.87552e+07	2	4.35188e+07	2					5.26451e+08	4
expobiome_smorf_10531904																																	2.5882e+07	2
expobiome_smorf_10547448																									1.0564e+08	1							3.44179e+06	1			2.65462e+07	2					2.12972e+07	2					2.27692e+07
expobiome_smorf_10702832																																	1.89675e+08	4
expobiome_smorf_10828427																																	3.67142e+07	1
expobiome_smorf_10841520																																	2.88986e+07	1
expobiome_smorf_10841561																																	1.04717e+07	1
expobiome_smorf_10842205																																	7.7052e+07	1
expobiome_smorf_10842503																																	2.41298e+08	1
expobiome_smorf_10842891																																	1.23515e+07	1
expobiome_smorf_10844370																																	5.614e+06	1
expobiome_smorf_10844922																																	3.76681e+07	1
expobiome_smorf_10844946																																	2.24637e+07	1
expobiome_smorf_10845647																																	4.52103e+06	1
expobiome_smorf_10846019																																	3.24824e+06	1
expobiome_smorf_10846150																																	5.32097e+07	1
expobiome_smorf_10846647																																	1.9444e+07	1
expobiome_smorf_10846848																																	7.75027e+06	1
expobiome_smorf_10847133																																	7.88753e+07	2
[truncated: 56,434 more rows]
[truncated: 33 more columns]

## Sheet: QExactive
proteins	BHC02_Pellet_QE	BHC02_Pellet_QE_Npeptides	BHC03_Pellet_QE	BHC03_Pellet_QE_Npeptides	BHC12_Pellet_QE	BHC12_Pellet_QE_Npeptides	BHC13_Pellet_QE	BHC13_Pellet_QE_Npeptides	BHC15_Pellet_QE	BHC15_Pellet_QE_Npeptides	BHC17_Pellet_QE	BHC17_Pellet_QE_Npeptides	BHC18_Pellet_QE	BHC18_Pellet_QE_Npeptides	BHC19_Pellet_QE	BHC19_Pellet_QE_Npeptides	BHC20_Pellet_QE	BHC20_Pellet_QE_Npeptides	BHC25_Pellet_QE	BHC25_Pellet_QE_Npeptides	BHC27_Pellet_QE	BHC27_Pellet_QE_Npeptides	BHC28_Pellet_QE	BHC28_Pellet_QE_Npeptides	BHC29_Pellet_QE	BHC29_Pellet_QE_Npeptides	BHC31_Pellet_QE	BHC31_Pellet_QE_Npeptides	BHC32_Pellet_QE	BHC32_Pellet_QE_Npeptides	KHC01_Pellet_QE	KHC01_Pellet_QE_Npeptides	KHC02_Pellet_QE	KHC02_Pellet_QE_Npeptides	KHC03_Pellet_QE	KHC03_Pellet_QE_Npeptides	KHC04_Pellet_QE	KHC04_Pellet_QE_Npeptides	KHC06_Pellet_QE	KHC06_Pellet_QE_Npeptides	KHC07_Pellet_QE	KHC07_Pellet_QE_Npeptides	KHC08_Pellet_QE	KHC08_Pellet_QE_Npeptides	KHC09_Pellet_QE	KHC09_Pellet_QE_Npeptides	KHC10_Pellet_QE	KHC10_Pellet_QE_Npeptides	KHC11_Pellet_QE
expobiome_human_015330	7.65339e+08	2	1.93171e+08	2			2.63391e+09	3	1.28119e+08	2	9.27634e+08	3	7.03703e+08	2	1.91997e+08	1	2.09219e+08	1	1.39306e+09	3	4.29421e+07	1	1.58302e+08	1			1.02712e+09	2			5.45738e+08	3			2.71256e+08	3	6.69025e+08	2	3.86625e+08	2	4.34485e+08	1	2.0223e+09	2	1.15305e+09	2	4.28439e+08	1	9.21076e+07
expobiome_human_017960											2.02088e+07	1					5.81558e+07	1
expobiome_human_044376					1.09149e+07	1													1.40935e+07	1							9.71298e+06	1			2.67961e+07	1											4.40613e+06	1
expobiome_imp_00479850
expobiome_imp_06152517													2.5796e+07	1																															4.586e+06	1
expobiome_imp_10922390																																									4.48498e+07	1
expobiome_imp_17087869																																							6.34104e+07	1
expobiome_imp_18930458			5.13288e+06	1					1.43764e+07	1	7.0023e+06	1															2.25011e+07	1			4.09939e+07	1			2.00235e+07	1							2.19898e+07	1					1.31022e+07
expobiome_imp_24097260																											7.07085e+07	1	3.65453e+08	1
expobiome_imp_26953264															1.25459e+08	1					4.6333e+07	1													1.23347e+08	3
expobiome_imp_27003352															2.19451e+07	1																			7.01171e+06	1													4.39122e+07
expobiome_imp_30169037									1.62667e+08	2																																	3.1297e+07	1			3.50686e+08	1
expobiome_imp_30285722					7.57159e+07	1																			4.84582e+07	1																			3.11163e+07	1
expobiome_imp_31906331															3.61966e+07	1
expobiome_imp_32083851																							6.66803e+06	1																					3.21001e+07	1
expobiome_imp_38405474					2.36295e+07	1			7.19642e+06	2															3.04732e+07	1
expobiome_imp_38781080															3.89191e+07	2
expobiome_imp_43347706					1.41921e+08	1
expobiome_imp_43392135					4.15685e+07	1					1.58873e+07	1																													1.80377e+08	2
expobiome_imp_43681214					6.62649e+06	1															7.90167e+07	3	1.25392e+08	4	3.51997e+06	1											8.86741e+07	4
expobiome_imp_47462785																					2.76558e+07	1					1.26275e+07	1																					4.42615e+07
expobiome_imp_47462936	5.38982e+08	1	1.70417e+08	1			1.11966e+08	1	2.51393e+08	1	2.91223e+08	1	4.10558e+07	1	2.8689e+08	1			1.50044e+07	1	2.88013e+07	1	1.16703e+08	1	2.36419e+08	1	1.98454e+08	1	9.70587e+07	1	3.05919e+08	1	1.02585e+08	1	1.44443e+08	1	1.23382e+08	1	1.68519e+08	1	1.21124e+08	1	1.36148e+08	1	2.90693e+08	1	1.94e+08	1	8.85714e+07
expobiome_imp_47480155	9.43349e+07	2	4.32488e+07	1			1.39563e+08	1			3.4967e+08	2	2.72196e+07	1					1.44568e+07	1											7.51087e+07	1	6.15999e+07	1	2.6292e+07	1					1.28852e+08	1			1.02104e+08	1			3.56403e+07
expobiome_imp_47561735	1.08694e+07	1											9.35025e+07	1			9.43342e+07	1																															1.25153e+07
expobiome_imp_47569628			4.7278e+07	1	9.77111e+06	1					3.19427e+07	1	3.38423e+07	1									1.55492e+07	1									5.34039e+07	2	2.28846e+07	1			3.98841e+07	1					3.00042e+07	1
expobiome_imp_47611437
expobiome_imp_47615775																					4.11805e+07	1											6.27884e+07	1															6.45504e+07
expobiome_imp_47660146	8.61335e+07	1	1.55992e+07	1					1.72273e+07	1			2.10744e+07	1	3.82571e+07	1	3.80512e+07	1									5.44975e+07	1													5.59475e+07	1	1.78087e+07	1	5.03805e+07	1	1.6965e+07	1
expobiome_imp_47665539					2.4375e+07	2											1.99233e+07	1									5.50682e+06	1
expobiome_imp_47668573	2.81905e+07	1					9.21002e+07	2	2.50404e+07	2	4.62838e+07	2	1.96156e+07	2	1.30954e+07	1	2.05433e+07	2													3.87396e+07	1			1.25593e+07	1					1.50438e+07	1			1.80214e+07	1			8.88496e+06
expobiome_imp_47683566	6.57667e+07	1	3.38229e+07	1	1.135e+07	1			3.22829e+07	1	4.05186e+06	1													5.06101e+06	1									3.4585e+07	1	3.32939e+07	1	3.84696e+07	1	2.34503e+07	1					2.44372e+07	1	4.96377e+07
expobiome_imp_47691954									1.55466e+07	1																															1.64812e+07	1							2.96934e+07
expobiome_imp_47798738	7.51221e+07	4	1.14219e+08	3			9.681e+07	3	1.90648e+07	2	1.09347e+08	3	5.39319e+07	3			7.18681e+07	1	1.60306e+08	4							5.00074e+07	3			3.44706e+07	3	5.97644e+07	2	2.64935e+07	2	6.04898e+07	2	2.99573e+07	2	4.79656e+07	1	4.66656e+07	3	1.2933e+08	3	3.83756e+07	3
expobiome_imp_47805100	9.08737e+07	1	1.18747e+08	1			1.32195e+08	1	8.6128e+07	1			3.31262e+07	1			2.05262e+08	1			7.42126e+07	1					1.50528e+08	1			1.5524e+08	1	1.95783e+08	1			1.0124e+08	1	2.87163e+08	2	1.45672e+08	1	8.83943e+07	1					9.56683e+07
expobiome_imp_47835172									4.06223e+07	2																					4.50699e+06	1	5.18329e+06	1
expobiome_imp_58852807																					1.98604e+07	2
expobiome_imp_68586619			4.34752e+08	1																							2.43912e+07	1											4.6739e+07	1							4.30112e+08	1
expobiome_imp_68586620			8.33123e+07	1	1.30255e+08	1
expobiome_imp_68632107							1.91952e+07	1
expobiome_imp_68669500			3.25278e+08	4			6.13217e+07	3																					1.30444e+08	2
expobiome_imp_68748173			3.08395e+07	1
expobiome_imp_68798412																																											1.45422e+07	1
expobiome_imp_68827284					2.01416e+07	1	1.62616e+07	1
expobiome_imp_69011762					1.21849e+08	3
expobiome_imp_71159727
expobiome_imp_73238345
expobiome_smorf_00912017
expobiome_smorf_01148204																											1.58047e+08	1											7.63406e+07	1
expobiome_smorf_01850539																																									5.99687e+06	1
expobiome_smorf_01863488																																																	5.90243e+07
expobiome_smorf_01919646																					3.40435e+07	1
expobiome_smorf_01936650
expobiome_smorf_02151537													1.04066e+08	3	3.33961e+08	2					2.8016e+07	2																			3.26384e+07	1					1.45143e+08	3	1.43934e+08
expobiome_smorf_02155371					2.73261e+08	1													1.06002e+07	1	2.30157e+07	1
expobiome_smorf_02159785			1.1098e+07	1	3.12944e+07	2	1.43871e+08	3	7.25258e+07	2	3.55939e+08	4			1.85118e+08	3					4.01994e+07	2					1.50372e+08	3	1.6542e+08	2											9.68019e+07	2	1.09517e+08	3	3.72935e+07	3	5.86416e+08	4	2.47535e+08
expobiome_smorf_02159786			8.31937e+06	1	1.42216e+07	1					1.84517e+08	2					7.75709e+07	2			4.06087e+07	1					7.47985e+07	1							4.01438e+07	2			4.02936e+07	1	4.34207e+07	1	7.79843e+07	1	5.69751e+07	1	4.93776e+07	1	7.59673e+07
expobiome_smorf_02159787					1.44606e+07	1	5.83825e+07	1			3.62309e+07	1					6.97013e+07	1																							7.73112e+07	1							2.45465e+07
expobiome_smorf_02159788					9.77932e+07	1	1.0653e+08	1	6.95042e+07	1	5.23811e+08	2	8.62772e+07	1	2.73758e+08	3	1.19522e+08	1	1.0036e+07	1	1.05807e+08	2	1.00367e+08	3			1.2901e+08	2	5.53435e+07	1					6.30716e+07	2	5.9819e+07	2	1.29428e+08	2	1.60382e+08	3	1.60942e+08	3	8.02049e+07	2	2.55972e+08	1	4.42181e+08
expobiome_smorf_02160008
expobiome_smorf_02161250			4.31771e+08	2	7.57188e+07	1																																	4.78803e+07	1							2.16792e+07	1
expobiome_smorf_02164203			1.56688e+07	1	3.47275e+07	1																																									1.93261e+07	1
expobiome_smorf_02164287					4.93957e+07	1	1.92776e+07	1	9.17624e+07	1	4.56743e+07	1															4.2533e+07	1			4.45967e+07	1																	5.10699e+07
expobiome_smorf_02165241			2.76538e+08	3	3.43609e+07	1																																	9.36584e+07	3							2.17884e+08	2
expobiome_smorf_02165625					2.27081e+08	1	3.35526e+08	3
expobiome_smorf_02166959					4.05869e+08	2	2.29807e+08	3			4.24131e+08	3									2.05235e+08	2	5.94831e+08	3											3.3834e+07	1	4.0029e+08	3							6.95273e+08	3
expobiome_smorf_02171767			2.14008e+07	1			3.27807e+08	2	2.38881e+08	4	1.57529e+08	1	1.41117e+08	3	7.91326e+07	2					2.46827e+08	4							2.94346e+07	1					5.33816e+07	3					3.84812e+08	4	1.42144e+08	2	1.20855e+07	1
expobiome_smorf_02171794					1.57983e+07	1	1.23127e+07	1			1.16035e+08	3											5.41761e+07	2																					3.54347e+07	1
expobiome_smorf_02174891									8.83276e+07	3	1.2695e+07	1	7.91507e+07	3			2.27931e+08	1	9.53456e+07	2					2.27076e+07	1	1.00907e+08	2			2.7592e+08	3					1.05158e+08	2	3.41278e+07	1	1.34828e+08	2							1.79089e+08
expobiome_smorf_02176217			2.11998e+07	1
expobiome_smorf_02180409			8.05322e+07	1							2.32403e+07	1			3.00136e+07	1					5.11577e+07	2									3.01441e+07	1			7.85886e+07	2	2.58758e+07	1											5.29735e+07
expobiome_smorf_02183384																											5.74609e+06	1
expobiome_smorf_02185740															3.62292e+07	2																							1.74759e+07	2							2.85238e+07	3	6.57964e+07
expobiome_smorf_02186036					5.08084e+06	1																																							5.25617e+07	2
expobiome_smorf_02187003															4.89599e+06	1																											1.24295e+07	1			6.54607e+06	1
expobiome_smorf_02189611			9.10749e+07	1					1.94924e+07	1	4.76908e+08	3	4.21036e+07	1	1.43119e+08	3					8.25085e+07	2	6.79864e+07	2											9.5547e+07	1			5.34893e+07	1	2.33219e+08	2	1.27216e+08	2	4.71711e+07	1	6.72637e+08	2	7.46024e+08
expobiome_smorf_02190372							4.25714e+07	1
expobiome_smorf_02190833																					7.85363e+06	1					2.00918e+07	2					1.29521e+08	1
expobiome_smorf_02191164																					2.9138e+08	3			4.26232e+07	2							4.52944e+07	2	1.13707e+07	1									1.01294e+07	1	2.45554e+06	1	4.22804e+07
expobiome_smorf_02191992							1.04528e+08	1																															4.23158e+07	1
expobiome_smorf_02192493							1.89779e+07	1			8.22234e+07	1																			4.46797e+07	1									4.14738e+07	1			8.47671e+08	1
expobiome_smorf_02193609																																									3.7618e+07	1					1.3826e+10	2
expobiome_smorf_02193613							6.84866e+06	1									2.70281e+08	3													2.06496e+07	2									6.94216e+07	3							1.00995e+08
expobiome_smorf_02195593			3.27167e+08	2			4.98857e+07	3	1.55799e+08	5	4.32219e+07	2	1.63252e+08	5	1.65833e+08	3	3.0038e+08	2	9.48624e+07	4	2.77899e+07	1	1.06866e+08	2	6.13518e+07	3	2.7244e+08	4			6.40834e+08	5	2.42466e+07	2	1.18439e+08	3	1.16984e+08	4	6.3832e+07	2	2.30849e+08	4	5.57604e+07	2	1.18205e+08	1	3.08034e+07	2	1.79963e+08
expobiome_smorf_02198776
expobiome_smorf_02199090									5.46248e+07	2	5.5082e+06	1	7.01752e+07	2	9.42698e+07	2	3.43491e+08	1	6.51253e+06	1	1.77386e+07	1									2.73488e+08	3	2.80737e+06	1	5.08106e+07	2	1.03499e+08	3	9.58371e+06	1	8.93154e+07	2	7.3993e+07	2			8.15116e+06	1	9.53614e+07
expobiome_smorf_02200102			2.50411e+07	1			7.21814e+07	1	3.81367e+07	1	3.73091e+07	1					2.79812e+07	1	3.30868e+07	1							1.01416e+08	2			2.35681e+07	1	3.37711e+07	2	5.28302e+07	2									1.68777e+07	1
expobiome_smorf_02200728																																									3.86802e+07	1
expobiome_smorf_02204157			1.20773e+07	1	4.78676e+07	1			8.89481e+07	2	2.22632e+07	1			4.93654e+07	1							1.05415e+07	1	4.89991e+07	2					9.16631e+07	1			1.06841e+08	2	1.15877e+08	2	3.82544e+07	1	2.10212e+08	2	5.70337e+07	1			3.48755e+07	1	5.26405e+08
expobiome_smorf_02204726					2.26399e+07	2
expobiome_smorf_02208306							1.26203e+07	1
expobiome_smorf_02210352
expobiome_smorf_02212106							2.61305e+07	1													4.44502e+07	1													8.6944e+06	1
expobiome_smorf_02215127			1.17388e+07	1	2.53943e+07	1	1.09115e+08	1			2.04833e+08	1	6.30658e+07	2	4.3703e+07	1	7.14057e+07	1	1.02836e+07	1	9.86343e+07	2			6.90521e+06	1	1.22727e+08	1									3.43778e+07	1	7.75305e+07	1	7.25459e+07	1			6.95721e+07	1	1.80194e+08	1	1.13766e+08
expobiome_smorf_02217220			1.81692e+08	2	3.83975e+07	1	3.34707e+07	1			1.70087e+08	2	4.26109e+07	1	1.10388e+08	2	2.49181e+07	1					3.76118e+07	1			1.18468e+08	1			5.88319e+07	1	1.05052e+07	1	3.09179e+08	2	4.13664e+07	1	1.52436e+08	1	1.84327e+08	2	1.14045e+08	1
expobiome_smorf_02218358							3.34896e+07	1	1.8286e+07	1	3.03135e+08	2			5.78394e+07	1	6.41978e+07	1					2.11803e+07	1			1.49203e+08	3							3.73652e+07	1			6.61245e+07	2	2.13986e+07	1	2.32669e+07	1	1.26609e+07	1			1.56656e+08
expobiome_smorf_02219888															3.88869e+07	2	1.19645e+07	1									3.21378e+07	2			1.8136e+08	3											6.03419e+07	2			1.00983e+07	1
expobiome_smorf_02220307																																			5.07001e+07	3
expobiome_smorf_02220457			3.03303e+07	1																											1.08589e+07	1							1.18803e+07	1	1.05637e+08	2	6.42419e+06	1	2.60088e+06	1
expobiome_smorf_02220923			1.60212e+07	1
expobiome_smorf_02221054			9.5336e+06	1			4.48331e+08	3	2.47114e+07	2	7.08775e+07	3													1.83562e+08	4			2.74323e+07	1
expobiome_smorf_02567115											1.58817e+07	1
expobiome_smorf_02576372									1.32458e+07	1
expobiome_smorf_02605976																																			2.48196e+07	1
expobiome_smorf_02607990																							1.91212e+07	1
expobiome_smorf_02609845																											7.12542e+06	1																	1.98282e+07	1
expobiome_smorf_02614300											3.53434e+07	1																									1.07461e+07	1
expobiome_smorf_02614302											5.39091e+07	2									6.75199e+06	1															4.60777e+07	1	7.09621e+07	1
expobiome_smorf_02821741																																									3.87299e+07	1
expobiome_smorf_02822366											1.44781e+07	1																							1.9136e+07	1					1.35973e+07	1			2.18038e+07	1
expobiome_smorf_02824177	1.90517e+08	1	3.00025e+07	1			1.12859e+08	1	9.16096e+08	2	3.35493e+07	1			1.22219e+08	1					2.95275e+08	1	5.38476e+07	1							1.6132e+08	1	2.154e+08	1	2.36361e+07	1			2.46287e+08	1	1.0909e+08	1	1.61632e+08	1	9.45241e+06	1	5.01163e+08	2	1.34131e+08
expobiome_smorf_02824178	1.08017e+08	3							5.99962e+07	2							4.40529e+07	1													5.5391e+07	2			3.33988e+07	2							1.74574e+07	1
expobiome_smorf_02825699																																											1.10838e+08	1					6.9763e+07
expobiome_smorf_02825734			7.27123e+07	4	5.63547e+07	2																													1.27575e+07	1					5.32462e+07	2
expobiome_smorf_02826279	2.08548e+08	1	1.44111e+08	1	4.21014e+08	2	9.28296e+07	2	2.50267e+08	2	4.06499e+08	4	8.91425e+07	1	1.91897e+07	1			1.16897e+08	1	4.92334e+07	1	2.87959e+08	4	2.62753e+07	1	4.2705e+08	2	1.72374e+08	2	1.01609e+08	1	9.28133e+07	2			1.17888e+08	2	3.31706e+08	3	1.75553e+08	1	4.45929e+07	1	1.07058e+08	1	8.76785e+07	1	1.09484e+08
expobiome_smorf_02826388	1.03126e+07	1	2.25807e+07	1	9.84069e+06	1	4.37368e+07	1			1.54738e+08	2							1.43414e+07	1			1.66394e+07	1			8.7458e+06	1													8.09243e+07	1			7.7154e+06	1			3.06239e+07
expobiome_smorf_02826975																																									5.4466e+06	1
expobiome_smorf_02827500							2.98868e+06	1
expobiome_smorf_02827524	4.29608e+06	1
expobiome_smorf_02828117			4.50369e+06	1							1.54342e+07	1																			7.4943e+07	2																	2.5739e+07
expobiome_smorf_02828797	3.39658e+06	1	6.50812e+06	1													8.36936e+07	3					5.29897e+06	1			7.57595e+07	3			1.26497e+07	1					3.06679e+07	2			2.26636e+07	1			3.39222e+07	2
expobiome_smorf_02829324
expobiome_smorf_02830021																											6.16705e+06	1
expobiome_smorf_02830406																	9.70891e+06	1
expobiome_smorf_02830494	1.71027e+08	1					4.79605e+07	1			1.52149e+08	1	5.73914e+08	1									1.23156e+08	1	1.3694e+08	1	7.71487e+07	1			6.82884e+07	1	4.27294e+08	1	7.55608e+07	1	9.89537e+07	1	6.10515e+07	1	1.71962e+08	1					5.21293e+06	1	1.03777e+08
expobiome_smorf_02830525							1.09705e+07	1	1.32084e+08	1					6.03916e+07	1							9.7492e+06	1			2.54749e+07	1									8.15055e+06	1	6.7448e+06	1
expobiome_smorf_02830533
expobiome_smorf_02831484			1.17254e+07	1							6.20095e+06	1													3.89424e+07	2	2.63407e+07	1
expobiome_smorf_02831778																							4.19255e+07	2
expobiome_smorf_02832159	8.33764e+07	1					8.80469e+06	1	4.85071e+07	1	2.41501e+08	2	1.08826e+08	1	3.02761e+07	1							2.30615e+07	1	4.3448e+07	1	3.96745e+07	1			8.69373e+07	1			2.12225e+07	1					4.89521e+07	1	1.5242e+08	1
expobiome_smorf_02832180							1.05476e+07	1			7.59106e+06	1																							7.93389e+06	1					1.15174e+07	1
expobiome_smorf_02832245																	3.88064e+07	1																											4.0669e+07	2
expobiome_smorf_02832908											2.26997e+07	1	1.48363e+07	1																											1.1503e+07	1			6.28016e+06	1
expobiome_smorf_02833333	8.24548e+07	1	1.89774e+07	1			3.36819e+07	1	6.86516e+07	1	2.62321e+07	1	6.91726e+07	2	7.44561e+07	1			2.80698e+07	1	2.31761e+07	1	1.81616e+07	2	4.30181e+07	2	5.20652e+07	1							5.30584e+07	2	5.48332e+07	1	1.5727e+07	1	2.43191e+07	1	1.43266e+07	1	3.44053e+07	2	4.47382e+07	1	9.81993e+07
expobiome_smorf_02833431					4.81763e+07	1	1.26515e+08	1													9.33211e+07	1							1.08145e+07	1							1.21977e+08	1	4.25724e+07	1	2.00125e+08	1			1.86782e+07	1			1.86282e+08
expobiome_smorf_02833911	5.33695e+07	1					2.23465e+07	1	4.87956e+07	1	1.51782e+07	1	2.55936e+07	1	3.4081e+07	1			2.66502e+07	1	2.43888e+07	1			9.41676e+06	1	3.90047e+07	1							5.86865e+07	2	8.49081e+07	2			2.17559e+07	1	2.64867e+06	1			3.36287e+07	1	1.18821e+08
expobiome_smorf_02834183									3.07138e+07	1
expobiome_smorf_02834729			1.00963e+07	1													1.59127e+08	1	2.35118e+07	1																			1.53576e+08	2					3.08358e+06	1
expobiome_smorf_02834789					2.53099e+07	2																													1.01979e+07	1					1.58658e+07	1
expobiome_smorf_02835986	1.85454e+08	2	5.97087e+07	1	2.12264e+07	1			1.33141e+08	2			1.37839e+08	2									6.10929e+07	1			8.33638e+06	1					3.37466e+07	1					2.77326e+07	1					5.44463e+07	1	8.66658e+07	1
expobiome_smorf_02836437																																																	1.87596e+08
expobiome_smorf_02836509	2.90453e+07	1	6.43793e+07	2			4.59586e+07	1	2.01001e+08	3	7.87977e+06	1	8.3162e+06	1	1.38854e+07	1	6.14966e+07	1			7.33797e+07	1					1.83622e+08	3			7.01789e+07	2	2.79082e+07	1	9.35655e+06	1	2.22037e+07	1	2.55626e+08	4	9.69703e+07	3	1.41691e+08	3			6.66811e+07	2	8.5201e+07
expobiome_smorf_02836886			6.8412e+07	1	1.05734e+08	1	5.87067e+07	1	1.0219e+08	1	4.68268e+07	1	2.50925e+07	1	3.03675e+07	1							1.85803e+07	1	2.28967e+07	1	9.4942e+07	2			5.1177e+07	1	7.07749e+06	1	6.29741e+07	1	2.53945e+07	1	3.51721e+07	2	3.21077e+07	1	2.01225e+07	1	4.94832e+07	1	1.57274e+07	1	2.26445e+07
expobiome_smorf_02837907	4.28955e+08	4	2.67456e+08	2	1.2011e+07	1			1.6399e+08	2	1.75103e+08	2	5.52613e+07	2	2.52833e+07	2			2.12834e+07	1	7.39293e+07	3	7.55079e+07	2	6.05425e+07	1			1.01896e+07	1	5.59547e+07	2	1.47428e+08	2	1.11168e+08	2	7.87249e+06	1	9.77197e+07	3	6.23621e+07	3	7.46845e+07	3	7.70287e+07	1	6.48408e+07	2	2.36061e+07
expobiome_smorf_02837908	1.33321e+08	2															2.26282e+07	2					1.64596e+07	1			1.64689e+07	1			3.49054e+07	1	1.28117e+07	1					9.38709e+06	1					1.25076e+07	1			3.65662e+06
expobiome_smorf_02838069	2.91511e+09	5	1.86778e+09	4	2.04501e+09	4	1.04317e+09	5	8.3736e+08	5	2.71035e+09	5	1.19289e+09	5	1.05523e+09	5	1.35012e+09	3			1.45119e+09	5	1.45268e+09	5	1.40896e+09	4	2.1274e+09	5	9.01049e+08	5	3.63089e+09	5	1.97878e+09	6	5.5927e+08	5	2.38724e+09	5	2.31704e+09	5	2.88558e+09	6	6.89293e+08	4	1.08233e+09	5			2.20405e+09
expobiome_smorf_02839711																																					2.4396e+07	2							8.07616e+06	1	4.59489e+06	1
expobiome_smorf_02839744	1.01276e+07	1									4.73671e+07	1																			2.10668e+08	3
expobiome_smorf_02839790					2.89661e+07	1			9.90746e+06	1													1.44779e+07	1			3.47046e+07	1	2.31609e+07	1
expobiome_smorf_02841069																	2.64705e+08	1
expobiome_smorf_02841274											5.65214e+06	1											7.75089e+06	1	1.52874e+07	1	1.7167e+07	2			7.92828e+06	1	2.08337e+07	1			6.97443e+06	1											2.02251e+07
expobiome_smorf_02843773			1.84374e+07	1	1.53238e+07	1	7.42836e+07	2					4.3522e+07	2	6.28221e+07	2			1.06574e+08	2	1.72615e+07	1			8.4898e+07	2	1.15235e+08	2	1.18942e+08	2							3.44484e+07	2	5.3409e+07	1	1.97076e+07	1					3.89889e+07	2
expobiome_smorf_02844212															8.84367e+06	1																																	3.06953e+07
expobiome_smorf_02844213	8.15521e+06	1																																													2.89517e+06	1
expobiome_smorf_02844214
expobiome_smorf_02845250							4.8636e+08	3							3.25215e+08	2			8.43023e+07	1	6.94455e+08	3									4.6802e+08	4	1.91289e+07	1			4.64936e+08	4	2.46782e+08	3	5.98664e+08	4	5.71784e+07	2	5.23282e+07	1			4.55117e+08
expobiome_smorf_02845595			8.50725e+07	3	1.17601e+08	4									2.29456e+08	5					1.71696e+08	4									2.08352e+07	2			3.5161e+08	5													5.62531e+07
expobiome_smorf_02846494	8.74617e+07	1					3.56184e+07	1	9.85896e+07	1	3.08014e+07	1	2.63962e+07	1	5.88616e+07	1	1.0574e+08	2			7.63501e+07	1			3.18636e+07	1	6.62534e+07	1	2.90506e+06	1					5.20991e+07	1	1.48703e+08	1	5.89154e+07	1	2.70021e+07	1	5.92867e+07	1	3.50896e+07	1	5.49531e+07	1	1.07661e+08
expobiome_smorf_02847043			4.0676e+07	1			4.84856e+07	1			1.79433e+08	1	2.07578e+08	1	5.88595e+08	1	2.25492e+08	1			4.51179e+07	1	6.31028e+07	1	1.27737e+08	1	2.74722e+08	1			1.37297e+08	1			1.44276e+08	2	1.31837e+08	1			8.13442e+07	1	3.36542e+08	1
expobiome_smorf_02847328	4.49408e+07	1									3.47595e+07	1																					2.00997e+07	1					1.43828e+07	1	2.07103e+07	1					7.05541e+06	1
expobiome_smorf_02847806	7.79225e+08	5	2.63864e+08	2					3.95302e+08	3	9.72182e+07	2	2.49729e+08	3	2.56889e+08	3	7.07552e+07	1	1.12052e+08	2	6.41302e+07	2	8.66833e+07	2	1.02318e+08	2	5.62033e+07	2	2.66648e+07	2	6.46815e+07	2	1.80604e+08	2	2.9581e+08	3			8.35551e+07	2	3.44167e+07	2	8.09481e+07	2	7.97758e+07	2	8.15825e+07	2
expobiome_smorf_02847809	1.48805e+07	1	1.76745e+07	1	1.0435e+07	1					1.07622e+08	4															4.71744e+07	2			6.66509e+07	2																	6.33301e+07
expobiome_smorf_02848243											1.69415e+08	1					2.33009e+08	1	9.16806e+07	1			6.04712e+07	1			4.49665e+07	1							5.10527e+07	1	6.3461e+07	1	5.62743e+07	1							1.29272e+08	2	6.498e+07
expobiome_smorf_02848542									1.06135e+07	1	1.8642e+07	1													1.05021e+07	1	8.04652e+06	1			2.35624e+07	2	7.96503e+06	1									4.84566e+06	1					1.41582e+07
expobiome_smorf_02848668											1.51733e+07	1																													4.76788e+07	1
expobiome_smorf_02848855	6.24009e+07	1			1.01605e+07	1	7.22666e+06	1			5.14361e+07	1	2.24138e+07	1			7.6664e+07	1					7.85759e+07	1			1.67283e+08	1			1.25629e+07	1	7.47917e+07	1											6.03846e+07	1
expobiome_smorf_02849720			5.12489e+08	3	2.21029e+07	1	6.66717e+07	2	4.47568e+07	1																					4.33906e+07	2	1.99498e+08	2	4.58081e+07	1					8.2586e+07	2			6.44802e+06	1			2.18909e+08
expobiome_smorf_02850042					1.53972e+07	1					1.05325e+07	1									1.42545e+07	1													3.23822e+07	1			2.50439e+07	1	1.93688e+07	1
expobiome_smorf_02850372			1.67019e+07	1			1.19897e+07	1			1.71996e+07	1
expobiome_smorf_02850494																																									1.16051e+07	1			4.93862e+06	1
expobiome_smorf_02851460	4.38249e+06	1	1.36976e+07	1							1.50657e+08	1	5.71909e+07	2									4.50007e+07	1	2.73264e+07	1							5.88151e+07	2											1.01742e+08	1
expobiome_smorf_02851464			5.23071e+08	5			2.30825e+07	1															9.17617e+07	2							5.18316e+07	1	2.63448e+08	1	4.19404e+07	1					1.65045e+08	2	4.65744e+07	1					7.30467e+07
expobiome_smorf_02851465			5.5606e+07	1					2.60282e+07	1			2.17783e+07	1			3.8385e+07	1
expobiome_smorf_02851772									1.35649e+07	1																					3.06592e+06	1	1.2556e+08	2					5.43036e+06	1							4.04309e+06	1
expobiome_smorf_02851788									2.50172e+07	1	1.07182e+07	1					2.26672e+07	1																					9.04224e+07	1	2.97593e+07	1
expobiome_smorf_02852512																	4.75259e+07	1
expobiome_smorf_02853069	1.32753e+07	1							1.07866e+07	1							6.53937e+07	2					3.97024e+07	2	2.25254e+07	1	5.90407e+07	2			4.53706e+07	2	5.38955e+06	1							6.85992e+07	2			2.5284e+07	1			2.17244e+07
expobiome_smorf_02853467	1.17166e+08	3	8.79128e+07	2	5.59089e+06	1			3.03702e+07	2	5.46136e+07	2	1.55173e+07	2			1.78401e+08	2	2.07901e+07	1	5.411e+06	1	8.43031e+06	1	8.14006e+06	1					4.50201e+06	1	3.28333e+07	2	2.76196e+07	1			1.28181e+07	1	1.85326e+07	1	5.87237e+06	1	5.09353e+07	2	7.16391e+06	1	1.27074e+07
expobiome_smorf_02853507			1.19339e+08	1							5.69652e+08	1	2.14436e+08	1			2.71036e+08	1							1.69234e+08	1	2.84576e+08	1			1.54172e+08	1			4.64898e+08	2	1.87313e+08	1	6.05444e+08	1	2.77807e+08	1					1.41092e+07	1
expobiome_smorf_02853682									2.80781e+07	1	6.94421e+06	1			1.58673e+07	1	6.61975e+06	1					1.97512e+07	1			1.16759e+07	1											2.54386e+07	2
expobiome_smorf_02854571	1.07832e+08	3	1.68733e+08	4					1.8097e+08	4	9.25935e+07	2			1.29648e+08	2	2.72765e+08	2	2.72666e+07	2	8.05053e+07	2	1.6818e+08	2	2.19125e+08	4	2.09768e+08	4			5.73896e+07	3	1.06002e+08	3	2.10196e+08	4			8.83603e+07	3	2.07138e+07	1	1.11333e+08	3	1.08099e+08	3	8.48834e+07	3	1.5294e+08
expobiome_smorf_02855705			5.92936e+08	3	2.19963e+08	2	6.59602e+07	1			1.11098e+09	6	1.80304e+08	3	1.56191e+08	2	4.09445e+08	5					7.60734e+07	2	2.0426e+08	2	3.02611e+08	4	4.83074e+07	2	1.95185e+08	2			7.0221e+08	4	2.03691e+08	2	3.01511e+08	3	2.68987e+08	2	3.49796e+08	3					6.19683e+07
expobiome_smorf_02855940					2.5178e+07	1	1.34558e+08	2							7.23833e+07	2			1.60477e+07	1	1.05958e+08	1									8.02901e+07	1					1.09565e+08	1	3.96416e+07	1	1.40433e+08	1			2.2211e+07	1			1.49926e+08
expobiome_smorf_02856355											5.05146e+07	2			1.21751e+07	1															1.12892e+07	1			5.96733e+07	2			5.23719e+07	1	6.31058e+07	2
expobiome_smorf_02856739			1.82455e+07	1							1.28708e+07	1																			3.83082e+07	1
expobiome_smorf_02858553									1.31954e+07	1					2.148e+07	2	2.75957e+06	1
expobiome_smorf_02858824	3.84429e+07	2							6.46298e+07	2	6.44126e+07	3	1.00931e+08	3			5.79229e+06	1	5.88027e+07	4							6.0638e+07	3			1.36752e+08	5	1.46897e+07	2	1.2595e+07	1					1.15126e+07	1	3.91702e+07	2
expobiome_smorf_02858937			9.34982e+06	1							1.08215e+07	1																													1.03708e+07	1							9.56511e+06
expobiome_smorf_02859490	9.38315e+07	3	8.45551e+07	2					8.2602e+07	2			1.24705e+08	3									3.09037e+07	1																							8.54663e+06	1
expobiome_smorf_02859972	2.63707e+08	3					7.24807e+06	1																	1.09474e+08	1					8.70412e+07	1							2.17005e+07	1
expobiome_smorf_02860167			2.92255e+07	1							2.11318e+07	1																					1.9856e+07	1					9.725e+06	1
expobiome_smorf_02860735																							8.8281e+06	1							2.10202e+08	1
expobiome_smorf_02861302									2.58209e+07	1															6.29155e+07	1	7.80276e+06	1							3.17611e+07	1	5.01194e+07	1			5.02811e+07	1
expobiome_smorf_02862336	1.29299e+08	2	1.59642e+08	1					8.06022e+07	2	1.46711e+08	2	4.57303e+07	1	2.44507e+07	1	1.88748e+08	2	3.01043e+07	1			4.96016e+07	1			2.82302e+07	1					7.93394e+07	1	3.10896e+07	1			6.1491e+07	1			3.92322e+07	1	1.32709e+08	2	1.62052e+07	1
expobiome_smorf_02862631			2.30614e+08	3	3.99241e+07	2					2.05236e+08	1																			8.70625e+07	3																	1.33212e+07
expobiome_smorf_02862693	4.13384e+07	1	4.80211e+07	2			3.68189e+06	1	9.70857e+06	1	1.29413e+07	1			3.09265e+07	1	1.02e+08	2			2.67628e+07	2	4.42408e+07	2	9.50279e+07	2	3.85293e+07	2							8.34066e+07	1	6.01164e+07	3			1.37482e+07	2			1.67721e+07	1	1.3489e+07	1
expobiome_smorf_02862695																	1.88187e+08	2																							1.53973e+07	1
expobiome_smorf_02862698	2.21079e+07	1					2.42222e+07	1			6.24654e+07	1					3.00272e+07	1													7.63372e+07	2	8.62043e+06	1															2.04428e+07
expobiome_smorf_02863143			3.60217e+07	2	4.86535e+07	2					4.00227e+07	2					2.82147e+07	2	5.53362e+07	2			2.27068e+07	2	2.97252e+06	1	4.1128e+07	2	2.15424e+06	1	5.23985e+07	2			2.38694e+07	2			6.25764e+07	2	4.27223e+06	2	8.16144e+06	1	4.32427e+06	1	6.1453e+07	2	4.33278e+06
expobiome_smorf_02863704							8.92091e+07	2					1.4501e+07	1					4.29061e+07	2																					1.10982e+08	2
expobiome_smorf_02863823	2.11335e+08	2	1.14223e+08	1					1.05292e+08	3	2.87404e+07	1	3.18685e+07	1	1.82496e+07	1	9.72062e+07	1			2.11152e+07	1	1.36963e+07	1	5.18402e+07	2	7.90271e+06	1			5.97013e+07	2	2.90455e+07	1	2.97979e+08	2			2.23311e+07	1					5.49169e+07	1	1.73581e+07	1
expobiome_smorf_02863902											5.75925e+06	1
expobiome_smorf_02864075									2.16024e+07	1	1.21238e+08	2											3.31211e+07	2			4.47138e+07	2									2.38608e+07	1									1.74608e+07	1
expobiome_smorf_02864787											1.24533e+07	1																													4.73026e+07	2
expobiome_smorf_02864946	7.45906e+07	1					8.26003e+06	1	1.60652e+07	1			2.90936e+07	1			5.17668e+07	1					3.14966e+07	1			1.31936e+08	1					1.9395e+07	1	4.5209e+08	1									7.27355e+07	1
expobiome_smorf_02865156			1.7456e+07	1			1.10822e+07	1			1.87412e+07	1			3.02074e+07	1					7.89088e+06	1			1.31604e+07	1							3.27556e+06	1	2.24295e+07	1			1.78567e+07	1	1.92568e+07	1	1.14977e+07	1	6.6747e+06	1			2.36699e+07
expobiome_smorf_02865525	4.28306e+06	1							4.40871e+07	3							8.55569e+07	2					2.67321e+07	2							1.09998e+07	1	2.48778e+07	2	6.49684e+06	1	3.41248e+07	2			4.41627e+07	2
expobiome_smorf_02865738															1.33652e+07	1																					3.95358e+07	2
expobiome_smorf_02866122																	1.05902e+08	2																											3.4485e+07	1
expobiome_smorf_02866302	1.01363e+08	1	7.62665e+07	1					3.93456e+07	1	1.04233e+08	2	2.40118e+07	1	4.80894e+07	1			6.09344e+07	3			3.04088e+07	1	4.33589e+07	2					1.28445e+08	3	1.75992e+08	3	2.31546e+07	1					1.39409e+07	1	3.95367e+07	2	8.38025e+07	2	1.58343e+07	1
expobiome_smorf_02866944			1.18206e+08	3					1.38709e+08	2							6.42338e+07	2			7.71731e+07	1	5.08733e+07	1	4.92181e+07	1									5.89063e+07	1					4.98914e+07	1	3.99491e+07	1	1.67036e+08	2
expobiome_smorf_02868111																																																	1.13353e+08
expobiome_smorf_02868240	1.39864e+07	1	6.65341e+07	3	2.3862e+08	1					1.64045e+07	1			2.95902e+06	1	1.64403e+08	4	7.2965e+06	1			1.23748e+09	1	7.53091e+07	1					5.7478e+07	1	2.37679e+06	1	6.88188e+06	1	1.62761e+08	2			5.86357e+07	1			2.49986e+08	3	6.16683e+07	1
expobiome_smorf_02868266	3.4752e+07	1													1.84932e+07	1																					3.92604e+07	1
expobiome_smorf_02869641	1.53785e+08	3			2.29863e+07	2			2.93259e+08	5	1.56184e+08	3	1.96923e+08	4	6.25217e+07	1	2.06197e+08	1			7.37137e+06	1	3.68596e+08	4	6.21535e+08	4	5.86426e+08	3	1.23601e+08	4	4.11886e+08	5	2.89591e+08	4	2.40233e+08	4	2.61219e+08	4							1.56899e+08	3	4.71248e+07	2	2.12316e+08
expobiome_smorf_02869890													1.06723e+07	1
expobiome_smorf_02870244			6.07154e+06	1													6.85955e+06	1																							2.4354e+07	1
expobiome_smorf_02870687					1.50222e+07	1	3.62789e+07	1	1.67619e+07	1													1.00236e+07	1			2.58619e+07	1			1.07383e+07	1			1.60996e+07	1											3.20316e+07	1
expobiome_smorf_02870849
expobiome_smorf_02871169	4.3078e+07	1							5.21701e+06	1	7.33032e+07	1					1.38488e+08	1					3.34555e+07	1									4.4358e+06	1															1.1384e+08
expobiome_smorf_02871202																					1.64534e+06	1					8.19447e+06	1
expobiome_smorf_02871759	3.96442e+07	1	6.64009e+07	1					3.63398e+07	1	5.33906e+07	1			2.6373e+07	1	3.43884e+07	1			5.72875e+06	1			1.88715e+07	1							6.30709e+07	1
expobiome_smorf_02871767			6.35815e+06	1	6.88779e+06	1																							1.85511e+07	1																	1.56087e+07	1
expobiome_smorf_02871915											1.682e+07	1					3.74963e+07	1					3.42311e+06	1			1.28317e+07	1			7.87017e+06	1	4.82204e+07	1					1.70964e+07	1
expobiome_smorf_02873064	1.15912e+08	2	9.04745e+07	3					8.91085e+07	3	1.14317e+07	1	2.21166e+07	1			8.27054e+07	1													4.80688e+07	1			2.32567e+08	2			1.96489e+07	1			1.66531e+07	1	5.62298e+07	2	6.04996e+06	1
expobiome_smorf_02873278									3.95477e+07	1
expobiome_smorf_02874273	3.59053e+07	1							4.59763e+07	1	7.90954e+07	1			9.89101e+06	1											2.26503e+07	1			3.31863e+07	1	4.75258e+07	1	1.06988e+07	1					1.3467e+07	1	8.08316e+07	1	1.37333e+07	1
expobiome_smorf_02874945
expobiome_smorf_02875047	4.73803e+08	2	2.77125e+08	3			2.41422e+07	1	4.33506e+08	3	2.19279e+08	1	4.30041e+08	4			2.02198e+08	1					1.92287e+08	1			2.48348e+08	3	3.55739e+06	1	1.01261e+07	1	4.33325e+07	1			3.82417e+08	4	6.90458e+07	1			1.43067e+08	1	1.29783e+08	1
expobiome_smorf_02875308	2.3397e+08	2							1.93803e+08	2	3.69597e+08	3					2.38273e+07	1					1.92084e+08	2	1.21248e+08	1	2.23256e+08	2			3.24421e+08	1	1.32216e+08	2			2.80863e+08	3	2.62153e+08	2							2.23814e+08	1	2.89889e+08
expobiome_smorf_02875865	7.2277e+07	1	6.42982e+07	1	5.91131e+07	1			6.52456e+07	2	8.56748e+07	1			3.3024e+07	1	1.81873e+07	1	6.07916e+07	1	4.02764e+07	1	7.93643e+07	2	4.94512e+07	1	5.82672e+07	2	1.30453e+07	1	1.49219e+08	1	4.67052e+07	1	4.70859e+07	1	5.8934e+07	1			5.61825e+07	1			2.45817e+07	1	1.21329e+08	2	7.39725e+07
expobiome_smorf_02876377	1.0816e+08	3							4.01866e+07	1			7.07087e+06	1	2.1867e+07	1			3.36148e+07	1							4.59496e+07	1							4.6978e+06	1	2.78759e+07	2	1.06611e+07	1							2.80227e+07	1	8.11845e+07
expobiome_smorf_02876378			5.55687e+06	1							1.60518e+07	1																													4.84171e+07	1							6.25998e+07
expobiome_smorf_02876379											1.56588e+07	1															4.98849e+07	2							1.25945e+07	1	7.38945e+07	1			1.70865e+07	1					7.71449e+06	1	5.47644e+07
expobiome_smorf_02876542																																			2.22396e+07	1									5.17223e+07	1
expobiome_smorf_02877004	2.1771e+07	2	1.35202e+08	3			5.42774e+07	3	2.36944e+07	2	2.83677e+06	1			1.96562e+07	2	4.33973e+07	1	7.15236e+06	1	2.75779e+07	1	8.04246e+07	2	7.67924e+07	2	2.57787e+07	2			6.91962e+06	1	2.62958e+07	2	2.97102e+07	2	3.47407e+07	2	2.4778e+07	3	6.0727e+07	2	3.45325e+07	2	1.03402e+08	3	3.80187e+07	3	1.24549e+08
expobiome_smorf_02877427	1.04382e+08	1							1.00993e+08	2	4.07538e+08	3	7.07677e+08	3									3.59293e+07	2	3.45681e+07	2	6.06498e+07	1			4.13466e+08	2	1.53811e+08	3	4.79702e+07	3							3.00549e+08	3	7.23439e+07	2
expobiome_smorf_02877908											8.40011e+06	1															1.33913e+07	1																			1.64131e+07	1
expobiome_smorf_02878051			6.27739e+07	3							2.5992e+07	1																											3.04488e+07	2			6.29572e+07	2
expobiome_smorf_02878435
expobiome_smorf_02879396	1.31189e+09	2	3.07513e+08	2					1.22183e+09	2	5.88367e+08	3	1.33915e+08	1	4.90245e+08	2	6.93174e+08	2	1.19559e+08	2	2.07759e+08	2	5.94304e+07	1	1.09473e+08	1	2.32562e+08	2	6.59619e+07	1	3.12185e+08	2	4.66788e+08	2	2.96073e+08	2	4.51142e+07	1	6.67678e+07	1	4.33318e+07	1	5.88536e+07	1	4.95512e+08	2	4.54729e+07	1	4.85336e+07
expobiome_smorf_02880418					2.08509e+07	1					1.77249e+07	1											1.08438e+07	1			1.34778e+06	1									4.86071e+07	2			3.87315e+07	2	1.00626e+07	1	2.7956e+07	1
expobiome_smorf_02880999			3.36156e+07	1	2.40813e+07	1	6.23179e+07	2	1.24706e+07	1	1.75524e+08	2	1.38285e+08	1	2.53776e+08	4	1.93779e+08	2	2.09844e+07	1			6.61753e+07	2			2.56529e+08	3			8.35479e+07	2	9.51126e+06	1	1.97021e+08	3	1.05025e+08	2	5.38656e+08	3	1.65958e+08	2	3.97381e+08	3					2.41111e+07
expobiome_smorf_02881311			3.19009e+07	1											4.86792e+06	1																			1.28953e+07	1
expobiome_smorf_02882290	3.06829e+07	1							3.55962e+07	1																					2.73899e+07	1
expobiome_smorf_02882533	2.72063e+07	1	1.63708e+08	2					3.51458e+08	1			7.85499e+07	1	8.96571e+07	2			7.65473e+06	1	5.58017e+07	1	3.63332e+07	1	4.60779e+07	1					1.32553e+07	1	1.94738e+08	2	1.18826e+08	1					8.91607e+07	2	1.0093e+08	2
expobiome_smorf_02882535			1.7277e+07	1			4.73115e+07	1															4.58886e+06	1									2.89979e+07	1							8.49517e+07	2			2.46114e+07	1
expobiome_smorf_02882555																																																	9.42231e+06
expobiome_smorf_02883350									1.42645e+07	1							8.62242e+07	2							3.50934e+06	1											2.6289e+06	1
expobiome_smorf_02883476																	3.42739e+07	1																	1.2855e+07	1					4.33241e+07	2							1.5532e+08
expobiome_smorf_02883568	8.20216e+07	1	1.67533e+08	2					1.47295e+08	2	2.81033e+07	1	4.25284e+07	2	1.29502e+08	1	2.17194e+07	1					1.17885e+07	1	5.80367e+07	1			1.31758e+07	1	5.06633e+07	1	4.18465e+07	1	1.49606e+08	2			1.43543e+07	1	1.22102e+08	1	4.14107e+07	2	1.69162e+07	1	3.42371e+07	1	2.3527e+07
expobiome_smorf_02883668	3.74277e+08	3													2.75617e+07	1																											1.61664e+07	1
expobiome_smorf_02884143	2.75402e+08	2	1.25959e+08	2					1.50649e+08	2	4.58391e+08	2			6.13901e+06	1	2.72546e+08	2					7.53956e+07	1	2.84419e+07	1	1.14475e+08	1	6.57054e+07	1	1.4258e+08	2	2.10114e+08	1	2.82289e+07	2	8.25539e+07	2			1.1484e+08	1	7.98317e+07	2	5.85767e+08	2
expobiome_smorf_02884858	1.5546e+07	1							6.28915e+07	1					9.50808e+06	1					2.42842e+06	1					2.48356e+07	1											2.09247e+07	1			1.05687e+07	1
expobiome_smorf_02885382	1.51577e+08	2	4.2758e+07	1			4.79997e+08	4			2.51882e+08	4			3.04871e+07	1			1.43811e+07	1	2.30306e+07	1			4.10798e+07	2	3.11436e+08	3							1.2384e+08	2			3.79199e+08	3			2.28391e+08	2					4.42328e+08
expobiome_smorf_03187732
expobiome_smorf_04176761																							5.0911e+07	1	6.67006e+07	2
expobiome_smorf_06027821
expobiome_smorf_06051124															9.2213e+07	4																																	2.552e+07
expobiome_smorf_06051487																																													5.77405e+07	2
expobiome_smorf_06054891																					2.10987e+07	1																							3.71285e+07	1	2.86186e+07	1
expobiome_smorf_06073267																																			3.23116e+07	1													1.28188e+07
expobiome_smorf_06343103							9.3008e+06	1
expobiome_smorf_06853567					1.11036e+08	3	6.19681e+07	2			1.65517e+08	4			4.69189e+08	5					8.16615e+07	2	3.11797e+07	2	4.33915e+08	4	2.99995e+08	4			9.74792e+07	3	1.42676e+08	4	4.51528e+07	2			8.83595e+07	3	3.13959e+08	4	6.45341e+06	1			1.22309e+09	5	5.13859e+07
expobiome_smorf_06857957															1.23752e+08	2									8.9207e+07	2									8.61672e+06	1			3.08992e+07	1							7.75848e+07	2
expobiome_smorf_06868439									8.04266e+06	1			1.32868e+07	2													1.91476e+07	1
expobiome_smorf_06875626																							5.62235e+07	2							6.31186e+07	2	5.93105e+07	1											5.90139e+07	1
expobiome_smorf_06878467							9.54656e+07	2			7.58849e+07	1			4.32672e+08	3																			7.7226e+07	2			1.24048e+08	2	7.30226e+07	1					8.3026e+08	3	1.35138e+07
expobiome_smorf_06878473							1.70222e+07	1			1.25194e+08	2			1.67188e+08	1	3.26515e+07	1			7.17151e+07	2	1.30925e+07	1	1.18182e+08	1	1.12552e+08	1			1.92194e+07	1	1.5763e+07	1	1.27392e+07	1			2.70041e+07	1	7.67182e+07	1					2.32629e+08	2	1.96976e+07
expobiome_smorf_06878476							4.62771e+07	1							7.8556e+07	1					8.87141e+07	1			1.88681e+08	2	2.4054e+08	2			4.30431e+06	1	6.58333e+06	1	3.97128e+07	1			6.27991e+07	2	1.13913e+08	1					6.79149e+08	2
expobiome_smorf_06878478					2.44919e+07	1	1.94944e+07	1			5.16295e+07	1			5.55433e+08	3					1.87998e+08	2	1.49713e+07	1	9.61925e+07	1	2.41343e+08	2			1.61834e+08	4	6.56847e+07	1							1.14157e+08	2					1.12141e+09	6
expobiome_smorf_06878479							2.15427e+07	1													1.23776e+08	1			2.06454e+08	1													7.32372e+07	1	1.4474e+08	1
expobiome_smorf_06878483							1.34391e+08	3			9.66835e+07	3					1.10877e+08	2																					1.55922e+07	1							5.96026e+07	3
expobiome_smorf_06883941					6.6972e+07	2	9.37232e+07	1			9.10023e+07	2			5.41435e+07	1			8.05508e+07	1	3.44742e+07	1	5.8076e+07	1			1.9977e+08	1									5.55946e+07	1	9.97749e+07	1	9.59078e+07	2	6.56564e+07	1			1.4672e+07	1
expobiome_smorf_07043839																																							7.73627e+06	1					1.53203e+07	1			5.25039e+08
expobiome_smorf_07055830
expobiome_smorf_07056465																																					2.88371e+07	1			8.83823e+06	1							1.83922e+06
expobiome_smorf_07056613
expobiome_smorf_07061762					4.98956e+06	1			2.20564e+07	2	1.44981e+07	2															1.40518e+07	1					1.80562e+07	1	1.18342e+07	2							8.91852e+06	1					5.16939e+07
expobiome_smorf_07061868																			5.47077e+06	1
expobiome_smorf_07071992					5.93125e+06	1	6.2192e+07	3																											1.2059e+07	1			4.41703e+07	1
expobiome_smorf_07079348											1.70322e+07	1											2.34671e+07	1											9.59499e+06	1					5.65009e+07	1
expobiome_smorf_08392264																					2.83071e+07	1
expobiome_smorf_08497165																															2.23219e+07	1	2.0994e+07	1
expobiome_smorf_08768829					1.15773e+07	1																									1.60971e+08	2									2.74049e+08	5
expobiome_smorf_08771582											1.46091e+08	1																			1.30485e+08	1											3.16929e+07	1
expobiome_smorf_08771583											9.24535e+07	1																			5.61667e+07	1							3.79052e+07	2
expobiome_smorf_08782936							5.71312e+06	1																																					1.42851e+08	2
expobiome_smorf_08783647											1.17112e+07	1																			7.81772e+06	1
expobiome_smorf_08784611																																													4.9076e+07	2
expobiome_smorf_08784613
expobiome_smorf_08789132
expobiome_smorf_08793475					5.50788e+07	2	8.07474e+07	3																			5.18631e+07	2	2.62681e+07	3							2.69253e+08	2			2.77345e+08	5			2.05917e+07	2	1.57999e+08	4
expobiome_smorf_08798744											4.71426e+07	1																			8.97838e+07	1			3.66409e+07	1			4.32246e+07	1									1.44153e+07
expobiome_smorf_08807277											4.71422e+07	1																			1.12732e+08	2			7.33445e+07	2			8.74709e+07	2
expobiome_smorf_08818688											5.60235e+07	2																			9.97906e+07	2							4.45956e+07	1									1.88982e+07
expobiome_smorf_08822084																							4.0977e+07	1
expobiome_smorf_08823581																															4.43326e+07	2			7.05468e+07	2			1.32952e+08	1
expobiome_smorf_09355237					3.19894e+07	2					1.86007e+07	1											4.66404e+07	3																	2.74429e+08	3			2.66608e+07	1			1.17669e+07
expobiome_smorf_09358441																															7.77375e+06	1	3.43723e+07	1
expobiome_smorf_09363389									2.6277e+07	1															3.09438e+07	1															1.60206e+07	1
expobiome_smorf_09367445																							1.13257e+07	1
expobiome_smorf_09379992					3.71595e+07	1			6.55486e+07	2															9.16791e+07	2
expobiome_smorf_09390096																					2.33335e+07	1
expobiome_smorf_09396595					1.73901e+07	1	4.55752e+07	2																											1.03387e+07	1
expobiome_smorf_09410568																																									1.02772e+08	3
expobiome_smorf_09428070																																																	2.02306e+08
expobiome_smorf_09428621																											3.60511e+07	1							4.35367e+07	1					2.45011e+08	1
expobiome_smorf_10128659													3.71551e+06	1
expobiome_smorf_10179607													3.71792e+07	2																					3.48102e+07	1					2.98321e+07	1
expobiome_smorf_10478623															2.87654e+07	2																			1.50752e+08	2
expobiome_smorf_10500181
expobiome_smorf_10521597															3.46643e+07	2																			3.37307e+07	1													5.72125e+07
expobiome_smorf_10543674															6.5169e+06	1																			9.09348e+06	1													6.64315e+07
expobiome_smorf_10547757															1.07086e+07	1																			1.53807e+08	2													2.09434e+07
expobiome_smorf_10765688
expobiome_smorf_11122835					7.67545e+06	1
expobiome_smorf_11130828					2.26826e+07	1
expobiome_smorf_11161358					1.13778e+08	1
expobiome_smorf_11177532
expobiome_smorf_11177540					2.69801e+07	1
expobiome_smorf_11179722					1.05111e+08	1
expobiome_smorf_11202932
expobiome_smorf_11279896
expobiome_smorf_11283328
expobiome_smorf_11283329
expobiome_smorf_11283330
expobiome_smorf_11321110
expobiome_smorf_11733899
expobiome_smorf_11734643
expobiome_smorf_12210317
expobiome_smorf_12210924	2.68068e+07	1									1.92551e+08	3	1.05581e+08	2	1.14768e+07	1							1.3292e+07	1			2.40846e+07	1			1.97916e+08	3									1.96136e+07	1	1.02755e+08	2	1.90239e+07	1
expobiome_smorf_12211157	1.91681e+09	7	8.30362e+07	1			4.62648e+08	6			7.45975e+08	7	7.18604e+07	1					5.35127e+07	3					7.73961e+07	3			2.43786e+08	4	3.67273e+08	5	3.28835e+08	4			8.45732e+07	3	3.95239e+08	6			1.62672e+08	3	7.5094e+08	5	4.96893e+07	1
expobiome_smorf_12211821	2.35517e+08	3					3.6026e+07	1			5.55421e+07	2									1.40092e+07	1			6.78794e+07	2	7.53279e+07	1							4.29875e+07	1							4.01828e+07	2	1.08593e+07	1
expobiome_smorf_12213249	1.1381e+08	1	1.1744e+08	1			5.2642e+07	1			1.41741e+08	1							2.06717e+07	1							5.77565e+06	1			1.46041e+08	1	1.11321e+07	1	1.07929e+08	1							3.74015e+07	1
expobiome_smorf_12214001																							2.32761e+07	1							7.85487e+06	1									2.77331e+07	1							1.65164e+07
expobiome_smorf_12214423																									8.28087e+06	1
expobiome_smorf_12214892	6.35111e+07	1							1.73077e+08	2			2.98981e+07	1			8.01164e+07	1					1.68802e+07	1			1.39718e+08	1			8.56592e+07	1	1.04613e+08	3	5.31438e+07	1	7.66668e+07	1	1.13004e+08	2	3.23279e+06	1	9.69612e+07	2					8.2894e+07
expobiome_smorf_12217800	6.15379e+07	1					7.32431e+06	1			1.67394e+07	1			1.4175e+07	1					9.62656e+06	1	8.12261e+07	1			8.91306e+07	1													8.07807e+07	2	3.57254e+07	1	3.62297e+07	1
expobiome_smorf_12218766	3.16731e+08	2							9.10604e+06	1			1.2739e+07	1			2.84827e+07	1															1.00249e+07	1			3.67458e+07	1									2.69794e+07	1
expobiome_smorf_12218898					1.87288e+07	2							2.91065e+06	1																					5.63639e+06	1					2.79958e+07	1
expobiome_smorf_12220455			1.08564e+08	1
expobiome_smorf_12220508	2.19355e+07	1
expobiome_smorf_12221305																	6.72119e+06	1					5.73493e+06	1	2.02784e+07	1							1.71351e+07	1											4.14381e+07	1
expobiome_smorf_12222405			1.56044e+08	2			1.54776e+07	1			3.48737e+07	2													4.99505e+06	1
expobiome_smorf_12223199	2.19108e+08	2											1.11582e+07	1																	1.69995e+07	1	4.92205e+07	2					9.89823e+07	2
expobiome_smorf_12223537	4.90738e+07	1	3.09727e+07	1			3.24381e+07	1																	4.38059e+07	1	6.64158e+07	1
expobiome_smorf_12223538			1.05288e+07	1							2.99246e+07	2					2.67302e+07	2							1.07011e+07	1
expobiome_smorf_12223835									1.92629e+07	1	1.06684e+07	1											6.63756e+07	2	2.97139e+07	1	4.93312e+07	1							5.26657e+06	1					6.20651e+07	2
expobiome_smorf_12223888	2.17987e+07	1					4.98768e+07	1																											4.59218e+07	1					7.43443e+07	1					2.89754e+07	1	3.60497e+07
expobiome_smorf_12224573									1.50495e+07	1			3.04289e+06	1							1.38054e+07	1													2.39911e+08	2
expobiome_smorf_12224869																																									1.19794e+07	1
expobiome_smorf_12224897									4.5474e+06	1																									8.01424e+07	1
expobiome_smorf_12226936																							3.56186e+07	1							2.65661e+07	1									4.71881e+07	1			3.62525e+07	1
expobiome_smorf_12227399																																			2.9101e+07	1
expobiome_smorf_12227400	2.80752e+07	1	1.08488e+07	1			7.11392e+06	1	9.6922e+06	1			7.68545e+07	2	1.4567e+07	1					1.45882e+07	1									2.78032e+07	1	2.79137e+07	1	1.3924e+08	2					4.67493e+07	1	9.39769e+07	2	9.95062e+07	2			2.01106e+07
expobiome_smorf_12229185	1.41838e+08	1					1.4543e+08	1			4.25016e+07	1	2.00023e+07	1			2.24611e+07	1			7.91655e+07	1															1.16406e+08	1	1.05541e+08	2			3.90548e+07	1
expobiome_smorf_12229317	6.03499e+07	1	4.76354e+07	1					7.34856e+07	1			2.48444e+07	1											3.0139e+07	1			1.44782e+07	1	9.03174e+06	1	4.46512e+07	1											2.2796e+07	1
expobiome_smorf_12229810																											1.70678e+07	1					1.3853e+07	1					1.32171e+07	1
expobiome_smorf_12229811	6.7588e+07	1	7.66539e+07	1	8.31238e+06	1	5.97252e+07	1	1.22232e+08	1	3.24817e+07	1	1.9234e+07	1	2.78101e+07	1					6.92695e+07	1			1.32742e+07	1	1.29662e+08	2			7.54495e+07	1	1.25538e+08	2	2.27317e+07	1	3.74937e+07	1	8.57941e+07	2	6.67967e+07	1	5.37521e+07	1			8.74611e+07	2	6.35654e+07
expobiome_smorf_12229869							8.34264e+06	1	8.24478e+06	1	3.00943e+07	1											3.64236e+07	1	5.71716e+07	2					1.0863e+08	3									1.10582e+08	3	7.61908e+06	1	9.45732e+07	3
expobiome_smorf_12230024							1.47948e+07	2																															6.06118e+06	1	3.13298e+06	1			1.26916e+08	2
expobiome_smorf_12231496	2.63522e+06	1																			7.92485e+06	1											2.77537e+07	1											1.23119e+07	1
expobiome_smorf_12232625									2.34313e+08	1																															2.14317e+07	1	3.03682e+07	1
expobiome_smorf_12233814																																									5.90131e+07	1			3.49218e+07	1
expobiome_smorf_12234625							1.55136e+07	1																															3.91012e+07	1			1.64002e+07	1	1.00468e+08	1
expobiome_smorf_12234739							2.21227e+07	1					2.08419e+07	1	2.06185e+07	1									2.14307e+07	1					5.67521e+07	2																	2.33649e+07
expobiome_smorf_12235229	2.06602e+07	1							2.53868e+07	1	1.59887e+07	1											4.0154e+07	1	5.20351e+07	1	4.56296e+07	1									2.85465e+07	1							1.40931e+07	1
expobiome_smorf_12237873													7.72107e+06	1																											2.8126e+06	1	1.22042e+07	2
expobiome_smorf_12237881									3.32592e+06	1																									4.61028e+07	1							1.78782e+07	1
expobiome_smorf_12238693																	2.80311e+07	1																	1.44121e+07	1			2.96411e+07	1
expobiome_smorf_12239995			5.58453e+07	1							4.50099e+07	2															4.24701e+07	1			3.15174e+07	1			4.34035e+07	2	3.6704e+07	1					4.13217e+07	1	3.98224e+07	1			1.22988e+07
expobiome_smorf_12240070	8.31611e+06	1	2.49361e+07	1	7.80919e+06	1																															1.92302e+07	1									1.22954e+07	1
expobiome_smorf_12240428	3.36749e+06	1																			9.75789e+06	1																							1.15194e+07	1
expobiome_smorf_12244402	9.32355e+07	2	8.1683e+07	1			2.99444e+07	1			7.26211e+07	2													3.07573e+07	1	4.6458e+07	1							5.56511e+06	1
expobiome_smorf_12244561	1.67745e+07	1							1.27706e+07	1			1.53155e+07	1			1.33035e+08	3					1.81933e+07	1			6.09543e+07	3			2.79665e+07	1	4.5356e+06	1							5.03855e+06	1							2.66333e+07
expobiome_smorf_12245130	3.48e+07	1					1.62674e+08	2			6.46351e+07	1									4.45257e+07	1					3.65274e+07	1
expobiome_smorf_12245738																	3.02561e+07	1
expobiome_smorf_12246345	1.44318e+07	1	4.25923e+07	2																													2.48207e+07	1											3.61424e+06	1	2.91069e+07	2
expobiome_smorf_12246561					8.47706e+07	1	1.45799e+07	1									6.84391e+07	3					1.4252e+07	1											1.76765e+08	2									1.09062e+08	2
expobiome_smorf_12249556	2.16079e+07	1	1.8099e+07	1	9.03597e+06	1																	1.79086e+07	1																	2.79586e+06	1			1.55107e+07	1
expobiome_smorf_12249558	1.19665e+08	2							1.56959e+08	2	3.48317e+07	1	1.09031e+08	3	5.00163e+06	1							7.70082e+07	3			4.76134e+07	2													3.36229e+07	2			1.23034e+07	1	1.51959e+07	2
expobiome_smorf_12250047	6.06628e+08	3	3.2624e+08	3	1.28671e+08	3			1.87447e+08	1			1.09369e+08	1	9.53042e+07	1							5.31429e+08	3															1.75637e+08	3					1.10196e+08	1	3.82617e+07	1
expobiome_smorf_12252348									8.26665e+07	2	3.5867e+07	1	8.42928e+06	1											3.02227e+07	2							1.14462e+07	1	5.31976e+07	1			2.20098e+07	1	3.63259e+07	1
expobiome_smorf_12252623	2.29957e+07	1	8.25299e+07	1									5.12773e+06	1													2.81797e+07	1
expobiome_smorf_12254593	1.26342e+08	2	5.65698e+07	1	1.90967e+07	1			3.82258e+07	1			3.52858e+07	1									3.16246e+07	1			5.73594e+07	1											8.25368e+06	1					3.20707e+07	1
expobiome_smorf_12255527			1.49797e+07	1													8.41232e+06	1													4.27776e+07	1													2.04129e+07	1
expobiome_smorf_12257671	8.60217e+07	2					2.20824e+07	1					1.24672e+07	1	2.10772e+08	1							8.7705e+06	1											4.20583e+07	2	4.69135e+07	2	5.07158e+07	3	1.43567e+08	3	4.24636e+07	2	5.68116e+07	3
expobiome_smorf_12257717																	1.50812e+08	2							2.33076e+07	1					1.91698e+07	1	1.39538e+07	1			6.5308e+07	2			1.01192e+08	2
expobiome_smorf_12258073																																													1.82192e+07	1
expobiome_smorf_12258936							3.83102e+07	1																															3.57378e+07	1					1.39548e+08	2
expobiome_smorf_12260071	2.57387e+07	2	1.40436e+07	1			3.67229e+08	6			6.26909e+07	2			3.58959e+06	1											1.45115e+07	1											1.54423e+07	1
expobiome_smorf_12261230									1.85035e+07	1																							6.43687e+06	1													5.29447e+06	1
expobiome_smorf_12261379	1.97482e+07	1	8.44319e+06	1									1.11506e+07	1											8.09378e+06	1	1.14276e+07	1	2.49437e+07	1															1.51398e+08	2
expobiome_smorf_12262104	1.51091e+07	1	9.34412e+07	3			4.5845e+07	2			3.00393e+07	1	6.27376e+06	1							1.26808e+07	1			3.79013e+07	2	5.63967e+07	2
expobiome_smorf_12262956							2.85059e+07	1			1.14994e+08	2	1.44714e+07	1													1.44188e+07	1
expobiome_smorf_12264724							4.3605e+06	1									1.89758e+07	1																							4.65391e+06	1
expobiome_smorf_12264727							1.17475e+07	1																																	1.9933e+07	1
expobiome_smorf_12264732	5.51059e+07	2	2.44704e+07	1			1.85115e+07	1	1.67784e+08	3	7.84358e+06	1	1.3989e+07	1	3.99185e+07	2					5.79895e+07	2					6.15739e+07	2			4.48623e+07	2	3.72844e+07	1	1.78314e+07	1	1.92044e+07	1	1.80375e+08	2	3.94393e+07	2	4.80376e+07	1			3.47658e+07	1	2.20286e+07
expobiome_smorf_12265003					8.34024e+06	1																			3.69856e+07	1
expobiome_smorf_12265646			8.24663e+06	1									1.62814e+07	1																			1.03132e+07	1	7.38049e+07	1					1.73193e+07	1	2.52604e+07	1	4.09073e+07	1
expobiome_human_006014																	3.52325e+08	1	3.68365e+08	1	8.20979e+08	1							1.28898e+08	1									3.74288e+08	1	2.20511e+09	2
expobiome_human_013288	4.51278e+06	1	9.08066e+07	3			9.4833e+07	4	1.35609e+07	1									4.16324e+07	3	3.69026e+07	1	1.5716e+07	1			1.35701e+07	2			9.34582e+06	1			5.62705e+06	1	1.37513e+07	1			1.53578e+07	1
expobiome_human_054031			7.90183e+07	1	4.45189e+07	1	1.2372e+07	1															1.20429e+07	3																			8.15819e+06	1
expobiome_human_076648	1.85086e+07	1	9.32351e+07	1	1.1365e+08	1	3.32277e+08	1			8.5767e+07	1			1.14298e+07	1			4.50514e+08	1	2.84565e+07	1	3.54615e+07	1			2.3628e+07	1	1.36557e+07	1	7.2579e+07	1	1.40986e+07	1			1.04448e+08	1	6.50706e+06	1	1.46042e+08	1	3.08361e+07	1	4.26792e+07	1	2.31123e+07	1	1.65181e+08
expobiome_human_100220																			2.446e+07	1															5.37612e+06	1
expobiome_imp_00324372																																	3.12379e+07	2
expobiome_imp_00328659																																	6.59349e+06	1
expobiome_imp_02197808																																	3.02206e+07	1
expobiome_imp_02873290																																	8.09386e+06	1
expobiome_imp_03333092																															2.66652e+07	1	3.03902e+07	1
expobiome_imp_06258958																											8.40839e+06	1					1.58165e+07	1
expobiome_imp_06682305																																	4.84282e+07	2
expobiome_imp_07342993																																	7.79276e+06	1
expobiome_imp_08757060																																	1.23546e+07	1
expobiome_imp_09699034																															5.2312e+06	1
expobiome_imp_10671290
expobiome_imp_10720926											1.48085e+07	1									1.52035e+07	2	3.60237e+08	3							2.03487e+07	1	2.44652e+07	2									3.01905e+08	3
expobiome_imp_10740886																																	9.02599e+06	1
expobiome_imp_16724517																							4.68108e+07	1
expobiome_imp_16847483																																																	1.88072e+07
expobiome_imp_17018756																	2.1896e+07	1			7.34267e+07	2
expobiome_imp_17049226																															2.53121e+07	1	9.13018e+06	1
expobiome_imp_18781557											7.15347e+06	1
expobiome_imp_18825645									6.35845e+07	1							1.38224e+08	1
expobiome_imp_18858110																	1.60773e+07	1	1.0161e+07	1													5.51475e+06	1			1.17103e+07	1			2.44835e+07	2			8.99729e+06	1
expobiome_imp_18860798	8.78963e+06	1																	4.3138e+07	1
expobiome_imp_18922167	2.77023e+07	1
expobiome_imp_18928169			9.841e+06	1
expobiome_imp_18932162													1.45536e+07	1	1.22417e+08	1																	1.00295e+08	1
expobiome_imp_18936584	8.81591e+07	1
expobiome_imp_18942764													4.08687e+06	1
expobiome_imp_21016742																															9.08362e+06	1
expobiome_imp_30118901																																	9.31803e+06	1
expobiome_imp_30212315																															4.56522e+06	1	1.25096e+07	2
expobiome_imp_30819225																																	1.79808e+07	1
expobiome_imp_31812911																															1.55598e+07	1	2.89617e+07	1
expobiome_imp_31924644																															1.42207e+08	1
expobiome_imp_32296151					7.67575e+06	1																					1.37912e+07	1
expobiome_imp_34934177																																	5.2292e+07	3
expobiome_imp_35020155
expobiome_imp_38464153																																	8.72151e+06	1
expobiome_imp_38700308																															1.92664e+07	1	1.45807e+07	1
expobiome_imp_38755073
expobiome_imp_41166324
expobiome_imp_43391214																																													6.61247e+07	1
expobiome_imp_43692166																																	6.86919e+06	1							1.47135e+07	1
expobiome_imp_44984255																																	6.37767e+06	1
expobiome_imp_47457535	2.51056e+07	1
expobiome_imp_47460264																																					1.11495e+07	1
expobiome_imp_47462699	2.57342e+08	1					2.91917e+07	1	4.83247e+08	1									1.65466e+07	1	3.78663e+07	1	1.75867e+08	1							1.5159e+08	1	2.21943e+08	2
expobiome_imp_47470855									9.49793e+06	1													3.07134e+07	1							5.24891e+07	1	2.28797e+07	1
expobiome_imp_47471233																							1.19119e+07	1
expobiome_imp_47482703							3.87998e+07	2
expobiome_imp_47486711			8.10919e+07	1	1.25893e+07	1			6.89162e+07	1	4.37624e+07	1	6.80921e+07	1									6.13706e+07	1							1.28214e+07	1	3.75563e+08	1	1.52294e+07	1							1.73821e+07	1			3.92024e+06	1
expobiome_imp_47493605																			8.40799e+06	1													1.15054e+08	1
expobiome_imp_47494364							2.07226e+07	1											5.13426e+07	2											9.10035e+07	1											1.95198e+07	1					3.74856e+07
expobiome_imp_47495195																	2.72976e+07	1																											1.14084e+08	2
expobiome_imp_47497557	5.2806e+06	1																					8.78159e+06	1																	1.94298e+07	2
expobiome_imp_47538610	9.53093e+07	1
expobiome_imp_47546230																									3.38529e+07	1							5.21935e+06	1
expobiome_imp_47549029							1.5844e+07	1
expobiome_imp_47550091																																					2.26544e+07	1
expobiome_imp_47551412																			1.18986e+07	1					6.18781e+07	1					3.54066e+07	1	1.11061e+08	1
expobiome_imp_47557748																															9.24527e+06	1	1.47452e+07	1
expobiome_imp_47563710
expobiome_imp_47580317	1.29446e+08	1					4.5088e+07	1	2.21358e+08	1	4.54427e+07	1	1.3528e+07	1	9.94093e+07	1							1.24372e+07	1	5.96259e+07	1	1.03807e+08	1	8.63435e+07	1	9.19681e+07	1			3.96944e+07	1	1.46432e+07	1	3.64879e+07	1	3.02792e+07	1	1.40025e+07	1	4.43057e+07	1	1.76877e+07	1
expobiome_imp_47595641																	6.84552e+07	1															3.83854e+07	1											2.37549e+07	1
expobiome_imp_47595643	8.97232e+06	1									2.97056e+06	1
expobiome_imp_47599758																							1.20183e+07	1
expobiome_imp_47607058							1.68099e+07	1									1.12754e+07	1																													1.14324e+07	1	3.36869e+07
expobiome_imp_47634843																															5.89409e+06	1	2.02653e+07	1
expobiome_imp_47649719					1.51943e+07	1	8.42452e+07	2																			1.76734e+07	1																					5.65739e+06
expobiome_imp_47660363			2.77799e+06	1
expobiome_imp_47680093																							9.34272e+06	1									2.21192e+06	1
expobiome_imp_47689584																	1.52611e+07	1																							1.22203e+07	1
expobiome_imp_47689591	2.33607e+07	1													2.13862e+07	1	2.1434e+07	1	6.25674e+07	2	8.14964e+06	1			1.25826e+07	1									1.78209e+07	1	2.09921e+07	1	1.41511e+07	1	1.34293e+08	1			1.52143e+07	1
expobiome_imp_47714706																																									8.70252e+06	1
expobiome_imp_47730876	8.40078e+07	1	6.44265e+07	1					3.23288e+07	1			7.94902e+07	1	3.11626e+07	1															4.55791e+07	1	2.76975e+06	1
expobiome_imp_47737861	2.0268e+08	1									6.96995e+07	1															1.28995e+08	1
expobiome_imp_47744824	3.14533e+07	2					2.06338e+08	2			2.92571e+08	2							7.53993e+06	1			2.57054e+08	1									5.9494e+07	2	7.3153e+06	1	5.42561e+07	2			3.57389e+08	1	2.00462e+08	3	3.25256e+08	3
expobiome_imp_47779702																									7.80266e+07	3
expobiome_imp_47780665	5.22355e+07	2	5.03836e+07	2					1.00626e+07	1	8.14577e+07	3					4.77454e+07	2	8.56229e+07	2							3.14241e+07	2			1.54572e+07	1	2.3961e+07	1	2.553e+07	1					1.82464e+07	1							2.56191e+07
expobiome_imp_47787532	5.67398e+06	1
expobiome_imp_47793193																																									1.66974e+07	1
expobiome_imp_47800636																																	2.18759e+06	1
expobiome_imp_47806807	4.22924e+07	1							3.13476e+07	1							5.15653e+06	1	2.91001e+07	1											1.32512e+07	1					5.79819e+07	1	3.26131e+07	1					1.00222e+07	1
expobiome_imp_47824753	7.07942e+07	1					5.30819e+06	1							1.98904e+07	1	1.67376e+08	1													7.4968e+07	1	2.02725e+07	1
expobiome_imp_47831982	1.03559e+07	1	8.1521e+06	1													2.21272e+07	1					2.3555e+07	1	2.21948e+07	1	3.07421e+07	1					4.40053e+07	1			3.53198e+07	1	1.03797e+08	1			9.99736e+07	1
expobiome_imp_47842049			4.2419e+07	1									2.89332e+07	1									1.38508e+07	1																					6.34734e+07	2
expobiome_imp_47844666																																	1.77044e+07	1
expobiome_imp_47849558	4.965e+07	1									1.26173e+07	1							7.86772e+06	1	7.8681e+06	1			6.47213e+06	1							1.09361e+07	2			3.15655e+07	2	2.21846e+07	2
expobiome_imp_47861565																			1.01085e+07	1											2.25807e+07	2
expobiome_imp_47869254																													1.15019e+07	1
expobiome_imp_48313086
expobiome_imp_48341457																	8.65672e+07	1
expobiome_imp_48723829																																	4.36017e+07	1
expobiome_imp_49255762																																	7.1221e+07	1
expobiome_imp_49399686																																	7.33904e+07	1
expobiome_imp_49416351																																	5.01779e+06	1
expobiome_imp_49466936																																	5.46233e+07	1
expobiome_imp_49519197																																	2.73281e+07	1
expobiome_imp_49523623																															3.18183e+07	1
expobiome_imp_49559571																																	1.25681e+07	1
expobiome_imp_49567659																																	2.9304e+07	2
expobiome_imp_49579202																																	5.18888e+07	1
expobiome_imp_49629680																															6.94312e+07	3	7.12357e+07	3
expobiome_imp_49634863																																	1.02079e+08	1
expobiome_imp_49664523																																	1.88949e+07	1
expobiome_imp_49667219																															4.75786e+07	1
expobiome_imp_49681334																																	3.69628e+07	1
expobiome_imp_49695180																															6.02835e+06	1	3.06261e+07	1
expobiome_imp_49698909																															9.86324e+07	1	3.97356e+07	1
expobiome_imp_49707406																																	7.35436e+06	1
expobiome_imp_49727940																																	1.21135e+08	1
expobiome_imp_49740317																																	7.61042e+06	1
expobiome_imp_49772313																															4.69891e+07	1	4.90834e+07	1
expobiome_imp_64930338																															6.2443e+07	3									2.78658e+07	1
expobiome_imp_65203780																															4.09289e+06	1	3.53339e+07	1
expobiome_imp_66604966																																	7.14414e+07	1
expobiome_imp_68574387
expobiome_imp_68669821							2.29278e+07	1			8.21774e+07	3									1.97801e+07	1	3.60439e+06	1			1.51223e+07	2											2.70272e+07	3	6.54086e+07	3	2.88439e+07	2					9.37374e+07
expobiome_imp_68718565											5.52956e+07	1																															1.97147e+07	1
expobiome_imp_68721880																													3.63028e+06	1
expobiome_imp_68870688			2.65913e+07	1																											1.54641e+07	2	1.72063e+07	1
expobiome_imp_68915012							4.43692e+07	1	9.46249e+07	3			6.1042e+07	2									7.73412e+07	3			7.81616e+07	3									1.02029e+07	1	9.46262e+06	1			7.4775e+07	3					7.94766e+07
expobiome_imp_73711184																															7.95079e+07	1	1.22412e+08	2
expobiome_imp_76933734																																	4.14558e+06	1
expobiome_imp_78079564																																	7.56843e+07	1
expobiome_imp_78173192																																	2.21183e+07	1
expobiome_smorf_00095094																																	3.25164e+07	1
expobiome_smorf_00256612																									1.02224e+08	3					7.49574e+08	5	3.55049e+07	2			5.94445e+08	4					2.83436e+08	1
expobiome_smorf_00454918																																	2.24806e+07	1
expobiome_smorf_01136063																																																	3.54291e+06
expobiome_smorf_01890087											4.03907e+07	1																			9.5916e+06	1																	2.0332e+07
expobiome_smorf_02149825							5.26803e+06	1			1.36376e+07	1																									7.447e+06	1
expobiome_smorf_02149976
expobiome_smorf_02151903																																																	4.41992e+06
expobiome_smorf_02152809					7.78677e+06	1	5.48854e+07	1	6.50482e+07	1	1.65027e+08	3	6.95186e+07	2	6.08651e+07	1	3.93079e+07	1			6.96349e+07	1	2.25559e+07	1			1.34654e+08	2							1.71111e+07	1			6.76354e+07	2	3.07687e+07	1	9.71536e+07	2	7.18754e+07	3	1.70281e+08	2	5.52488e+07
expobiome_smorf_02153235																	2.76349e+06	1																											3.28749e+06	1
expobiome_smorf_02153316																																			8.71225e+06	1
expobiome_smorf_02153323																																			1.20707e+07	1									1.07226e+07	1
expobiome_smorf_02153425			1.2362e+07	1					2.16853e+07	1																					4.35025e+06	1	1.22905e+07	1	5.8013e+06	1					7.0464e+06	1					3.92414e+06	1	8.43353e+06
expobiome_smorf_02154272											1.9404e+07	1			6.75935e+07	1																			1.50531e+07	1
expobiome_smorf_02155342
expobiome_smorf_02157051																																									2.59544e+08	2
expobiome_smorf_02157518											1.67527e+07	1															4.48151e+06	1													5.77563e+06	1
expobiome_smorf_02157823									3.12431e+07	2	9.80201e+06	1	2.82713e+07	1	2.87761e+07	1											3.59267e+07	1			3.30121e+07	1			1.88626e+07	1					1.15987e+07	1	8.26935e+06	1					5.20451e+07
expobiome_smorf_02158372																			2.17014e+07	1
expobiome_smorf_02158648			3.48874e+07	1	6.13034e+07	2	1.88115e+07	1	2.51509e+07	1			7.91535e+06	1					5.52705e+06	1			5.06809e+06	1	8.43954e+06	1													4.72733e+07	2	1.71741e+07	1			7.40532e+06	1
expobiome_smorf_02159413																																	1.01647e+07	1
expobiome_smorf_02161276																																							2.49396e+07	1	9.95625e+07	1					1.9135e+08	1	6.71092e+07
expobiome_smorf_02161944											1.53082e+07	1
expobiome_smorf_02165845																							4.03788e+07	1	1.19001e+07	1									3.15929e+07	1					2.13016e+07	1			7.09719e+07	1
expobiome_smorf_02167064																									2.96755e+06	1							3.76635e+06	1
expobiome_smorf_02169090															1.48287e+06	1					1.38489e+07	1			2.60282e+07	1							4.90077e+07	2					1.88427e+07	1									9.84944e+07
expobiome_smorf_02170125			9.88179e+08	5																	6.85248e+06	1													1.11551e+07	1													5.61487e+07
expobiome_smorf_02171042					1.04903e+07	2																			2.14018e+07	1															1.04282e+07	1			2.52069e+07	1			1.16162e+08
expobiome_smorf_02171818					1.85926e+06	1					9.43109e+06	1															7.73443e+06	1																	8.47054e+06	1
expobiome_smorf_02173354																															3.27831e+06	1	2.10675e+07	1															1.04419e+07
expobiome_smorf_02173366			7.02176e+07	1									1.10123e+07	1	2.81756e+07	1																																	2.96807e+07
expobiome_smorf_02174335													6.23293e+06	1
expobiome_smorf_02176001			2.40606e+06	1
expobiome_smorf_02176038																																									5.64114e+06	1							1.92911e+06
expobiome_smorf_02176442			1.80918e+07	1									1.21586e+07	1																					4.07517e+07	1									9.78625e+07	1
expobiome_smorf_02176443			3.09996e+07	1																																									2.77704e+06	1
expobiome_smorf_02177126			1.83125e+07	1			1.55719e+08	2			3.18168e+08	3			9.88637e+06	1					8.58604e+06	1	4.68849e+07	1			1.4042e+08	2											8.62262e+07	2	1.52758e+08	3	5.29849e+07	2	4.76426e+07	1	1.7229e+07	1	1.56283e+08
expobiome_smorf_02177593			8.90409e+06	1
expobiome_smorf_02178807																					1.18157e+07	1																											3.04441e+07
expobiome_smorf_02178808					1.06675e+07	1																																											5.52619e+07
expobiome_smorf_02179255																																	2.01044e+07	1													5.32843e+06	1
expobiome_smorf_02179786					6.08229e+07	1	9.17609e+06	1																	5.54936e+07	1							1.94388e+07	1					1.32254e+07	1									1.63065e+08
expobiome_smorf_02180526									1.68935e+07	1	4.88986e+06	1																																	7.67001e+06	1
expobiome_smorf_02181219									1.89226e+09	8	1.55569e+09	5	3.50659e+08	5																															1.91886e+09	6	1.12626e+09	6	8.49851e+07
expobiome_smorf_02182134			7.69479e+06	1													8.12902e+06	1																	7.20339e+06	1
expobiome_smorf_02183540																															1.81859e+07	1
expobiome_smorf_02184582																																	6.56229e+06	1
expobiome_smorf_02184949
expobiome_smorf_02184957			1.2623e+07	1
expobiome_smorf_02185869			1.52425e+07	1			2.81599e+07	1			3.4498e+07	1	2.59652e+07	3	7.83968e+07	2					2.00395e+08	2	6.76774e+07	2			1.57566e+08	2													1.50568e+08	3	2.86649e+07	1					2.48834e+08
expobiome_smorf_02186317																																													2.88911e+07	1			3.72583e+07
expobiome_smorf_02188809											2.59927e+07	2
expobiome_smorf_02189670																																																	1.24791e+07
expobiome_smorf_02190218									2.89519e+07	1																																					2.41856e+07	2
expobiome_smorf_02191282											2.31097e+07	1																													2.19711e+07	1	4.15326e+06	1			1.41283e+08	2	6.56532e+06
expobiome_smorf_02193608															2.40038e+07	1											2.96495e+07	1			6.54616e+07	1					4.71092e+06	1			3.27032e+07	1	3.45924e+06	1
expobiome_smorf_02193610									1.41815e+07	1							1.07564e+08	2	1.81898e+07	1											6.36813e+07	1			1.77296e+07	1	5.12745e+07	1					1.60098e+07	1					6.44402e+07
expobiome_smorf_02193612									3.34591e+07	2			8.28204e+06	1	4.12678e+07	1			7.04093e+06	1	5.81253e+07	2					8.34863e+06	1			1.62099e+08	2			2.71964e+07	1							2.09538e+07	1
expobiome_smorf_02193614			4.866e+06	1					4.74456e+07	1			1.03508e+08	2					8.24102e+07	3	1.48272e+08	2			2.32724e+08	2	1.00673e+07	1			3.46609e+07	1	8.50125e+07	1	3.32984e+07	1	4.08813e+07	1			2.98443e+07	1	4.90668e+07	1			6.57414e+08	1	6.71489e+06
expobiome_smorf_02193615							7.02588e+06	1	6.01371e+07	1	2.11569e+07	1	1.38888e+08	2	8.81057e+07	1			8.96501e+07	1	1.15458e+07	1					4.48272e+07	1			2.0384e+08	3	3.1041e+07	1			1.73326e+07	1	1.04459e+07	1	1.412e+07	1	2.38058e+07	1			4.78095e+07	1	6.52056e+07
expobiome_smorf_02195883							3.92008e+07	2									4.13235e+06	1					5.57654e+06	1
expobiome_smorf_02197691																	3.46368e+06	1
expobiome_smorf_02199023																	9.06363e+06	1									9.05148e+06	1
expobiome_smorf_02199140																																			2.65666e+06	1
expobiome_smorf_02199205			1.41182e+08	4			6.42614e+06	1	1.795e+07	2	1.22956e+07	1
expobiome_smorf_02200056									2.61539e+07	2	3.68468e+07	1	1.59075e+07	1					2.70421e+07	1											9.45376e+07	1					4.70223e+07	1			1.14564e+08	1	2.03386e+07	1					8.28497e+07
expobiome_smorf_02200612																															1.11066e+07	1	1.94979e+07	1
expobiome_smorf_02204414			1.90507e+07	1																													1.9799e+07	1
expobiome_smorf_02204809
expobiome_smorf_02205987																																							9.01443e+06	1									1.98606e+07
expobiome_smorf_02206442			9.5064e+07	2									6.17461e+07	2							3.1241e+07	1													3.3883e+07	1													1.23505e+07
expobiome_smorf_02207360																																									1.13393e+07	1
expobiome_smorf_02208601			2.24086e+07	1
expobiome_smorf_02208780																									3.75968e+07	1													3.23075e+07	1			4.20407e+07	1
expobiome_smorf_02210803			3.29964e+07	1			6.06858e+07	2
expobiome_smorf_02211097
expobiome_smorf_02211564							3.83577e+07	1																					1.71915e+07	1									3.54716e+07	2
expobiome_smorf_02212413			1.64754e+07	1			1.57107e+07	1
expobiome_smorf_02212551			2.35258e+07	1					5.50888e+06	1	7.39508e+07	1			7.59828e+07	1							3.99323e+07	1	3.75691e+07	1
expobiome_smorf_02213174
expobiome_smorf_02214890
expobiome_smorf_02215125					3.66818e+06	1			3.91392e+06	1	1.56687e+07	1			5.69209e+07	2					4.76158e+06	1					2.10003e+07	2	2.14562e+07	2											3.66952e+06	1	7.75165e+06	2			3.00898e+07	1	4.97559e+07
expobiome_smorf_02216429			2.55798e+07	1																											1.89247e+07	1	2.58787e+07	1	3.98324e+06	1					9.15198e+06	1
expobiome_smorf_02216729					1.29657e+07	1																			8.78593e+06	1													4.91119e+06	1	6.98411e+06	1
expobiome_smorf_02216770			8.20595e+06	1							1.01267e+08	2					4.18382e+08	3																			3.23648e+07	2
expobiome_smorf_02217967																																	3.45337e+06	1
expobiome_smorf_02217986															3.40256e+07	1					1.97391e+07	1									1.33089e+07	1	2.17702e+07	2	1.58428e+07	1			4.95948e+07	1
expobiome_smorf_02219764			3.07526e+06	1
expobiome_smorf_02220526											2.21275e+07	1			1.27203e+07	1	1.57683e+07	1			9.54839e+06	1	1.58197e+07	1			2.29413e+07	1											2.08823e+07	1			3.54607e+07	1	2.54055e+07	1			4.90118e+07
expobiome_smorf_02220652			1.59486e+08	1							3.78028e+07	1			2.56164e+07	1							4.33969e+06	1			1.67471e+07	1	1.91933e+08	2																	1.75762e+08	1
expobiome_smorf_02221530					1.72346e+07	1	3.80104e+07	1							4.19524e+07	1	2.40731e+07	1					2.38926e+07	1			7.75157e+07	1							6.59671e+07	1			9.25843e+07	2	3.81925e+07	2	4.81842e+07	2			1.82543e+08	2	3.94213e+07
expobiome_smorf_02558818																																																	8.41323e+06
expobiome_smorf_02559520																																	3.65119e+06	1
expobiome_smorf_02569843																							1.17686e+08	1			3.51154e+08	1
expobiome_smorf_02577647					2.28606e+08	3							1.19922e+08	2																											2.35194e+08	4							1.04165e+08
expobiome_smorf_02582216							7.05698e+06	1
expobiome_smorf_02583107																																	2.3057e+07	1
expobiome_smorf_02588596																																									3.9676e+07	1	5.85141e+06	1
expobiome_smorf_02589409																									5.4903e+06	1
expobiome_smorf_02592517																																	5.49537e+07	1
expobiome_smorf_02600567							4.34829e+07	1																																							2.58127e+07	1
expobiome_smorf_02611243																																			2.13087e+07	1
expobiome_smorf_02613689																																	1.62811e+07	1
expobiome_smorf_02616262
expobiome_smorf_02662321																															5.29933e+07	2	6.76458e+07	1
expobiome_smorf_02821046																															1.13302e+07	1
expobiome_smorf_02821047																															1.44071e+07	1	2.24114e+07	1															2.99239e+07
expobiome_smorf_02821358	1.09242e+08	3					3.66032e+07	2	3.8215e+07	1			1.11594e+07	1													4.66918e+07	3
expobiome_smorf_02821404					2.86102e+07	1																					8.77446e+06	1
expobiome_smorf_02821459																																			4.75566e+06	1
expobiome_smorf_02821610							1.24805e+07	1			1.85447e+07	1																																	5.66239e+06	1	8.47813e+06	1
expobiome_smorf_02821721	4.76106e+07	1	1.03949e+08	1	1.37038e+07	1			3.14777e+07	1	1.98725e+08	2	7.47509e+07	1			6.33223e+07	1			3.37958e+07	1	3.94988e+07	1			3.59072e+07	1													8.95462e+07	2	1.34061e+07	1	8.85093e+07	3
expobiome_smorf_02821739			2.72224e+07	1	1.35989e+08	2			7.7148e+07	2	1.56062e+08	2							4.36556e+07	1			3.7174e+07	1					2.26149e+07	1							1.80462e+07	1	2.73312e+07	1	4.9016e+07	1	7.96658e+06	1	2.8245e+07	2	1.05159e+07	1
expobiome_smorf_02821742	1.92617e+07	1																											7.04195e+07	1	7.27838e+06	1									5.23583e+07	1
expobiome_smorf_02821764
expobiome_smorf_02821786																																	4.0988e+07	1									6.6305e+07	1
expobiome_smorf_02822061	5.82082e+06	1															1.07617e+08	1	1.12886e+07	1																					1.87197e+07	1
expobiome_smorf_02822101																					1.77548e+07	1																	1.64088e+07	1									2.48536e+07
expobiome_smorf_02822130													3.31801e+06	1																													1.87871e+06	1					5.44194e+06
expobiome_smorf_02822564							1.19642e+08	3			3.88308e+07	1																			1.61056e+07	1	1.09124e+08	1			1.03903e+08	1			1.3068e+07	1
expobiome_smorf_02822614																																	1.14406e+07	1
expobiome_smorf_02822675					6.00618e+07	1
expobiome_smorf_02823063			1.33317e+08	1							4.40443e+07	1																			2.47926e+07	1	8.58684e+07	1															2.42383e+07
expobiome_smorf_02823389	1.03009e+08	1	1.02903e+08	1			6.76728e+07	1	2.55586e+08	1			2.22271e+07	1					3.45143e+07	1					1.06148e+08	1					7.78384e+07	1			1.12451e+08	1			1.52521e+07	1			5.78259e+07	1			8.0473e+06	1	4.42991e+07
expobiome_smorf_02824640			1.65737e+08	2																											3.71159e+07	2	8.77427e+07	2	2.98551e+07	1					6.01629e+07	1							5.60841e+07
expobiome_smorf_02824986	2.68965e+08	3	5.83325e+07	2			1.89394e+08	2			1.64902e+08	2			1.04044e+08	1	1.63731e+08	1					4.97447e+07	1			5.95458e+08	3			2.7376e+08	2	1.59193e+08	1	9.01358e+07	1	8.92995e+07	1	3.69121e+08	2	2.26506e+08	3					7.23548e+06	1
expobiome_smorf_02825150																											1.94406e+07	1
expobiome_smorf_02825400					6.11313e+06	1			3.35525e+07	2	7.31451e+07	2																			4.45913e+06	1	5.16723e+07	1			1.96311e+07	1	1.31792e+07	1					3.68551e+07	1
expobiome_smorf_02825489
expobiome_smorf_02825723																															7.41092e+06	1
expobiome_smorf_02825795	5.3642e+07	2	1.20067e+07	1					8.00291e+06	1	1.12794e+08	1							2.22629e+07	1											6.1511e+07	2					5.7982e+06	1							2.19001e+07	1	5.35977e+07	1
expobiome_smorf_02825796											4.66635e+07	2					8.3692e+06	2	1.75944e+07	1			2.10375e+07	1							9.58997e+07	1			3.52448e+07	1					7.9229e+06	1			1.37102e+08	1			2.31487e+07
expobiome_smorf_02826134											1.11596e+07	1					1.07239e+08	1
expobiome_smorf_02826165
expobiome_smorf_02826403											5.49729e+06	1									3.47521e+07	1	5.783e+07	1																			4.50035e+07	1
expobiome_smorf_02826949																							3.62711e+07	1
expobiome_smorf_02826974									7.97673e+06	1	1.62418e+07	2											1.06584e+08	3	1.93731e+07	1																	1.11676e+08	3
expobiome_smorf_02827525	8.55739e+06	1							4.82625e+07	1																											7.03465e+07	1
expobiome_smorf_02827837
expobiome_smorf_02827967			1.14153e+08	2			2.14198e+07	1	1.43237e+08	2	1.56275e+08	1	2.01744e+08	2	3.54063e+07	1	1.80522e+08	1	7.31224e+06	1	7.80299e+07	1	7.96132e+07	2			5.69291e+07	2			4.26833e+07	2	2.18862e+08	2					1.85347e+07	2	7.69148e+07	1	8.39224e+07	2	2.13864e+08	2
expobiome_smorf_02827972			1.00414e+08	3					9.829e+07	2											4.0796e+07	2	5.9723e+07	1									2.85835e+07	2											3.99282e+07	1
expobiome_smorf_02827973
expobiome_smorf_02828447					3.02941e+08	1	2.99874e+08	2							3.69135e+08	2			8.33284e+07	1	3.57785e+08	3							5.16683e+08	1	4.27746e+08	1					2.2747e+08	2	1.16638e+08	2	4.64497e+08	2	7.76875e+07	2					1.01009e+09
expobiome_smorf_02828911			2.40951e+07	1					2.0258e+07	1	1.95145e+07	1																	1.04542e+06	1			9.37866e+07	1	2.16328e+07	1							1.06826e+07	1
expobiome_smorf_02829006	8.13252e+07	1	1.00281e+08	2			6.95063e+07	2	7.68882e+07	1	2.9043e+07	1			3.84758e+07	1					1.70386e+07	1					1.23907e+07	1			3.47781e+07	1	1.67841e+07	1	6.39026e+06	1					5.43849e+07	1	4.50286e+07	1	5.19967e+07	1	1.3696e+07	1	1.17271e+08
expobiome_smorf_02829007											1.73047e+07	1			7.411e+06	1															7.00636e+06	1			1.93571e+07	1			8.48789e+06	1									9.23197e+06
expobiome_smorf_02829093	7.85461e+06	1
expobiome_smorf_02829171			6.65767e+07	2									2.61197e+07	1			1.72209e+08	1																											8.13689e+07	2
expobiome_smorf_02829431			6.0044e+06	1			7.06843e+07	2					1.45387e+07	1															1.37525e+07	1	3.21451e+07	2							4.49769e+07	2
expobiome_smorf_02829460																	3.84171e+07	1																	6.73605e+07	1	2.77592e+07	1
expobiome_smorf_02829920																					4.01139e+06	1											4.11966e+07	1
expobiome_smorf_02829929													2.80614e+07	1			2.85644e+07	1																											1.3311e+08	1
expobiome_smorf_02830184			9.78389e+07	2					5.11736e+06	1	1.1791e+08	2	3.54671e+07	1	1.04273e+08	2	1.10842e+07	1							2.37522e+07	1	2.19559e+08	3			1.10394e+07	1			2.6281e+08	2	4.73074e+07	2	2.02432e+08	2	1.10408e+08	2	4.17654e+07	1
expobiome_smorf_02830925			2.38186e+07	1																							1.43876e+07	1					2.65021e+06	1					2.08952e+07	1
expobiome_smorf_02831006	1.74868e+07	1					1.9729e+07	1	1.32487e+07	1	1.46887e+08	2			1.07961e+08	2			7.65901e+06	1	4.28563e+06	1	9.93959e+07	2	2.63275e+08	3	5.8626e+07	2			3.19822e+07	1	5.21579e+07	2	8.46036e+07	2	3.94752e+06	1	1.19408e+07	1					1.35525e+08	2			6.01463e+07
expobiome_smorf_02831129																									3.45717e+07	1									3.39614e+07	1									2.03706e+07	1	1.75195e+07	1
expobiome_smorf_02831151			1.596e+07	1																	3.73277e+07	1											2.38936e+07	2
expobiome_smorf_02831768
expobiome_smorf_02831780	7.3483e+07	1															1.34667e+08	1	1.53568e+08	1			1.87302e+07	1			8.1854e+07	1			5.77955e+07	1					5.02484e+07	1	5.70142e+07	1	1.2694e+08	1	1.59541e+08	1					1.23643e+08
expobiome_smorf_02831818			5.83742e+06	1
expobiome_smorf_02832297																	1.16564e+07	1
expobiome_smorf_02832402	9.39657e+06	1					1.90164e+07	1																	8.0583e+06	1	1.64373e+07	1											2.20567e+07	1
expobiome_smorf_02832408	1.04756e+07	1	2.32811e+07	1			2.12112e+08	4			5.74261e+07	2															3.53312e+06	1															5.8698e+06	1
expobiome_smorf_02832419	6.64592e+07	1	6.92497e+07	1			1.32958e+08	1			9.53124e+07	1			1.38364e+07	1			6.61807e+06	1	2.34778e+07	1			5.09344e+07	1	9.25745e+07	1							8.32035e+07	1			1.30079e+08	2			7.74798e+07	1	3.1201e+07	1	3.15706e+07	1	8.15057e+06
expobiome_smorf_02832423																																							2.76785e+07	2
expobiome_smorf_02832445													3.84642e+07	1
expobiome_smorf_02832448													6.958e+06	1
expobiome_smorf_02832788																											3.20712e+07	1			6.7804e+06	1
expobiome_smorf_02833382																																			2.34683e+07	1
expobiome_smorf_02833463	9.40612e+06	1	1.10055e+07	1																	4.54796e+07	1																			3.8276e+07	1
expobiome_smorf_02834003													2.7233e+07	1
expobiome_smorf_02834045							7.70737e+07	2							1.78707e+07	1	2.97847e+07	1									4.58313e+07	1			1.94217e+07	1									3.78066e+07	1							4.65701e+07
expobiome_smorf_02834207											2.28158e+06	1															5.28398e+06	1							1.12294e+08	1							6.21777e+06	1
expobiome_smorf_02834395																																	3.63551e+07	1
expobiome_smorf_02834509																															1.91533e+07	1	1.30227e+07	1
expobiome_smorf_02834547
expobiome_smorf_02834734																																													2.72521e+07	1
expobiome_smorf_02834805											8.22443e+07	4	4.05525e+07	3			3.31002e+07	1					1.42487e+07	2	2.0851e+07	2	2.16103e+07	1			1.17829e+07	1	1.42929e+06	1	4.08757e+07	2	3.92248e+07	3	9.2046e+07	4	2.36846e+07	1
expobiome_smorf_02834941	2.39774e+07	1																															7.84159e+07	1
expobiome_smorf_02835186			2.90428e+08	1																					2.27247e+08	2							1.8724e+08	1	6.05496e+06	1
expobiome_smorf_02835201			2.69629e+07	1																											6.09233e+06	1
expobiome_smorf_02835271									3.09024e+06	1
expobiome_smorf_02835273																											1.96656e+07	1							1.35e+07	1									7.69959e+06	1
expobiome_smorf_02835355					6.529e+07	1															1.45208e+07	1
expobiome_smorf_02835391																	3.14999e+07	2
expobiome_smorf_02835717											3.80059e+08	3	1.4605e+08	2	5.02694e+07	1															3.56924e+08	1									1.59498e+08	1	9.358e+08	2	4.83826e+07	1
expobiome_smorf_02836639																											1.15119e+07	1											1.56082e+07	1			7.18466e+06	1			1.45307e+07	1
expobiome_smorf_02836641	5.77891e+06	1	7.42355e+06	1			1.54969e+07	1			7.80408e+06	1																											2.97209e+07	1					8.67197e+06	1			2.96524e+07
expobiome_smorf_02837053							5.95016e+07	3							6.97369e+06	1															3.45879e+07	2									2.2445e+07	2
expobiome_smorf_02837125																																					1.23275e+07	1
expobiome_smorf_02837193													1.49782e+07	1																							5.91189e+06	1
expobiome_smorf_02837614	3.17788e+08	2					2.92048e+08	2																	4.80157e+07	1					2.45319e+08	2	1.65733e+08	1			2.43691e+07	1							4.74249e+08	2
expobiome_smorf_02837746											1.13173e+07	1
expobiome_smorf_02837785											7.8466e+07	1																													1.04039e+08	1			2.06414e+07	1
expobiome_smorf_02837905			3.72695e+08	1							1.56407e+08	1	1.56722e+08	1							1.45283e+08	1			2.35509e+08	1			3.38227e+07	1	2.64574e+08	1	3.1759e+08	1							1.38336e+08	1	8.03019e+07	1	2.40808e+08	1
expobiome_smorf_02837910	1.44738e+08	1	6.85807e+07	1					1.03238e+08	1	1.29097e+07	1	2.21041e+07	1			1.6567e+07	1	4.06522e+07	1	4.36406e+07	1			4.43485e+07	1	1.43726e+07	1			3.05661e+07	1	2.86774e+06	1	3.93019e+07	1			5.19815e+07	1			8.59225e+07	1
expobiome_smorf_02838230	5.50412e+06	1													6.67775e+06	1					2.3717e+06	1	7.7476e+06	1	8.46999e+06	1	5.33573e+06	1											4.54138e+06	1			4.43358e+06	1
expobiome_smorf_02838427																					5.51173e+06	1											7.3793e+06	1															6.69132e+07
expobiome_smorf_02838434	2.09617e+08	1
expobiome_smorf_02838687																															3.32755e+07	2	2.19847e+07	1
expobiome_smorf_02838737			6.02802e+07	2					4.30286e+07	2											5.76103e+07	2											1.46818e+08	3	8.62601e+06	1					1.15859e+07	1	5.14457e+07	2	6.02262e+07	2			7.48354e+06
expobiome_smorf_02838871									2.83565e+07	1	6.96684e+07	1					3.15971e+07	1									2.01192e+07	1			2.69188e+07	1	3.88929e+07	1											1.0698e+08	1	1.79005e+07	1
expobiome_smorf_02838934																																							8.23731e+06	1
expobiome_smorf_02839019											1.67686e+06	1																											4.18914e+06	1	474490	1
expobiome_smorf_02839582					3.81655e+07	1			1.30934e+07	1	9.26916e+07	1			2.71381e+07	1			5.33639e+07	1			1.48744e+08	1																	1.04318e+07	1							3.76264e+07
expobiome_smorf_02839680											4.24247e+06	1			7.62424e+06	1
expobiome_smorf_02839715
expobiome_smorf_02840006							4.57419e+07	1			1.42278e+08	1	5.87941e+07	1			4.80461e+07	1			1.8468e+07	1											9.12031e+07	1					1.20469e+07	1	6.8682e+07	1							2.21716e+07
expobiome_smorf_02840008	1.13551e+07	1					8.27501e+07	3			1.17226e+08	3	3.71361e+06	1	7.66412e+06	1	1.48819e+07	1	5.79374e+06	1			7.37161e+06	1			1.71071e+06	1			3.08185e+06	1	7.30103e+07	3	2.86105e+07	2	2.84407e+07	2			3.58204e+07	3	3.15869e+07	2	3.63604e+07	2			8.47654e+06
expobiome_smorf_02840199			2.40144e+08	2					9.37172e+07	1					1.72832e+08	1	4.07764e+08	2													2.27788e+08	1	1.05286e+08	1											4.2714e+08	2
expobiome_smorf_02840276
expobiome_smorf_02840594																																											5.07351e+07	1
expobiome_smorf_02840658																																							3.6286e+06	1
expobiome_smorf_02840696							2.59021e+08	3							4.22103e+07	2																			2.21478e+07	1			4.34859e+07	1			1.5786e+07	1					1.17154e+07
expobiome_smorf_02840699											1.89649e+08	2			1.21229e+08	2					7.32567e+07	2			7.31479e+07	2	1.52606e+08	1							9.64569e+07	1							1.71381e+08	3	1.31515e+08	2	1.6427e+08	1	2.29028e+08
expobiome_smorf_02840890			1.23035e+07	1	8.77079e+06	1			6.77676e+06	1	1.26202e+07	1	7.87144e+06	1													1.73471e+07	1					3.70693e+06	1			1.19451e+07	1	1.29494e+07	1
expobiome_smorf_02841207																	9.11863e+06	1							3.722e+07	1
expobiome_smorf_02841313
expobiome_smorf_02841682																																									3.27243e+07	2
expobiome_smorf_02842132															1.06726e+06	1
expobiome_smorf_02842162																	5.93899e+06	1
expobiome_smorf_02842206																																											2.58188e+07	3
expobiome_smorf_02842635	8.75003e+07	3	6.31724e+07	2							4.41524e+06	2	2.58658e+07	1									4.28727e+07	2			2.08782e+07	2													3.5949e+06	1	1.11598e+07	1
expobiome_smorf_02842736																																	3.3753e+07	1	6.48075e+07	1
expobiome_smorf_02842783					1.87785e+08	5															1.38146e+07	1
expobiome_smorf_02842978																																	6.86797e+06	1
expobiome_smorf_02843098			1.08656e+07	1					2.50774e+07	1	1.1504e+07	1	6.7166e+06	1									1.15573e+08	1													1.90524e+07	1			8.82039e+06	1
expobiome_smorf_02843100	5.57864e+07	2			3.07488e+07	1	1.04194e+07	1	3.30537e+07	1	2.17458e+07	1					2.79558e+07	2					6.62561e+07	2			1.17291e+07	1			1.45616e+07	1					1.83647e+07	1			7.28292e+07	2			4.83618e+07	2
expobiome_smorf_02844757			1.16409e+08	2
expobiome_smorf_02845080							7.96568e+06	1			6.89262e+07	1																			3.02214e+07	1									9.43153e+07	1			4.69199e+07	1
expobiome_smorf_02845466																																	5.26556e+06	1
expobiome_smorf_02845523			4.94e+07	2							1.97516e+07	1															7.22217e+06	1																	6.56368e+06	1
expobiome_smorf_02845880	4.41895e+07	2					1.76449e+07	1			5.71746e+07	2	2.91732e+07	1					1.35258e+07	1	7.50533e+06	1			1.74817e+07	1					8.05618e+06	1	5.79825e+07	2			5.72821e+07	2			1.52628e+07	1			3.60277e+07	2
expobiome_smorf_02846534	4.94938e+06	1															1.61472e+07	1							1.68107e+07	1	1.06023e+07	1					6.99813e+06	1							6.44255e+06	1
expobiome_smorf_02847055																			3.73678e+07	1									2.00741e+07	1							1.33064e+07	1									4.04245e+07	2	2.02306e+08
expobiome_smorf_02847208
expobiome_smorf_02847327			2.98714e+07	1			3.31343e+07	1	2.5342e+07	1	1.20469e+08	1			1.56133e+07	1											1.38478e+07	1			1.2339e+07	1													8.96334e+07	1	3.54824e+07	1
expobiome_smorf_02847513							5.32464e+06	1															3.56747e+06	1																			5.67764e+06	1	1.14994e+07	1			7.06084e+06
expobiome_smorf_02847709									1.13924e+07	1	3.65313e+07	1	5.93683e+07	2													6.61411e+06	1					2.51358e+07	1									3.63762e+07	2
expobiome_smorf_02848134					4.37435e+07	2															8.54942e+06	1
expobiome_smorf_02848224																																													2.63073e+07	1
expobiome_smorf_02848269											9.97249e+06	1					1.51932e+07	1
expobiome_smorf_02850009	1.4323e+07	1																													1.81161e+07	1			1.9584e+07	1
expobiome_smorf_02850138							4.71207e+06	1																															6.87614e+06	1
expobiome_smorf_02850139	1.23847e+07	2							6.40565e+06	1					3.64905e+06	1															2.93344e+07	3	1.07303e+07	1	2.53656e+06	1							4.6143e+06	1
expobiome_smorf_02850404
expobiome_smorf_02851458			3.58149e+07	1					1.66182e+07	1																							7.22833e+07	2	1.14192e+07	1					3.5514e+07	1	1.36013e+07	1			2.38333e+06	1
expobiome_smorf_02851459									3.39776e+07	1	8.88434e+07	1	6.82854e+07	1									1.72165e+07	1									4.99379e+07	1	5.69228e+07	1	1.17272e+07	1					2.99304e+07	1	4.12596e+07	1
expobiome_smorf_02851461																	2.31736e+08	1															3.75795e+07	1							1.24375e+08	1			3.40809e+07	1
expobiome_smorf_02851462
expobiome_smorf_02851799											8.07072e+06	1																															3.37326e+07	1
expobiome_smorf_02851847									9.49628e+06	1
expobiome_smorf_02851945			2.67736e+07	1			2.61369e+07	2	3.77369e+07	1	3.40596e+06	1	2.24973e+07	1			8.47495e+07	2			1.60934e+07	1					3.90771e+07	1			6.60324e+07	2	3.47809e+07	2			6.52773e+07	2	3.02004e+07	2	3.52787e+07	2	4.43996e+07	2			5.60293e+06	1	3.9156e+07
expobiome_smorf_02851955													2.57164e+07	1									3.01966e+07	2							1.72969e+07	1	2.1236e+07	1									3.17721e+07	1	2.42563e+07	1
expobiome_smorf_02851956											1.00476e+08	1	2.65855e+08	2									3.46785e+07	2							2.14337e+08	2	1.25177e+08	2							3.97761e+07	1	6.80548e+07	1
expobiome_smorf_02851963																																											3.59284e+06	1
expobiome_smorf_02851971
expobiome_smorf_02851976							2.04746e+07	1					4.47862e+07	1					1.0134e+08	1											5.00815e+07	3	1.73944e+07	1									2.60365e+07	1
expobiome_smorf_02852211			2.5775e+07	1					1.04184e+07	1																																			1.26785e+07	1
expobiome_smorf_02852249	9.66941e+06	1	1.68078e+08	3							3.0687e+07	2					5.97692e+07	1	3.82928e+07	2			4.36794e+07	2	1.54275e+07	1	2.64421e+07	1			1.31133e+08	3	2.94075e+07	1	4.61377e+07	2											4.43322e+07	2	1.58688e+07
expobiome_smorf_02852279																																									2.68296e+08	2
expobiome_smorf_02852961					1.63826e+07	1	8.76386e+07	1							7.41405e+07	1			2.11319e+07	1	1.5816e+08	1									1.56116e+08	1					8.23896e+07	1	4.23445e+07	1	1.10167e+08	1	2.39127e+07	1					1.21659e+08
expobiome_smorf_02853201	5.05333e+07	1	2.46641e+07	1			1.47922e+08	3			4.8094e+07	1													1.18749e+07	1	1.60893e+08	3											5.12808e+07	1			6.34786e+07	2
expobiome_smorf_02853487																																													5.59439e+06	1
expobiome_smorf_02853995	8.44853e+07	1	6.58339e+07	1					4.05636e+07	1	5.5276e+07	1	5.11268e+06	1	5.20946e+07	1			3.15379e+06	1			1.59045e+07	1	1.62451e+07	1	2.84396e+07	1	2.91986e+07	1			6.75908e+07	1	1.6776e+07	1	8.89876e+06	1			3.32741e+07	1	1.1817e+07	1	8.05162e+07	1	8.03592e+07	1
expobiome_smorf_02854010
expobiome_smorf_02854337
expobiome_smorf_02854472			1.88549e+07	1
expobiome_smorf_02854523	3.06878e+07	1																													1.31629e+07	1													3.80493e+07	1
expobiome_smorf_02854524	2.97288e+07	1									1.9378e+06	1																							3.23229e+07	1									6.12023e+06	1
expobiome_smorf_02854584	5.48845e+06	1							2.71249e+07	1	3.88801e+07	2																													2.00374e+07	1			4.97215e+07	3
expobiome_smorf_02854686																																			1.80196e+07	1											1.11776e+07	1
expobiome_smorf_02855008																									2.26184e+07	1
expobiome_smorf_02855197			4.02801e+08	2			7.66696e+07	2	3.07833e+07	2	4.00537e+08	2	2.5788e+08	2	8.10083e+07	1	3.40512e+08	1					8.41084e+07	1	3.53324e+08	3			8.13943e+07	1													3.92195e+08	2			2.50003e+07	1
expobiome_smorf_02855367
expobiome_smorf_02855467	4.42854e+07	1							3.57683e+07	1			7.40227e+06	1											2.12037e+07	1	4.05881e+07	2			2.27017e+07	1	4.66447e+07	1			1.17063e+07	1					1.59897e+07	1	1.33207e+08	1	5.16177e+07	1
expobiome_smorf_02855702	6.09841e+07	2	1.33857e+07	1			1.28433e+07	1	1.48378e+08	2									5.4665e+07	2			2.06326e+08	2									3.41891e+07	2							9.10163e+07	2			5.42624e+07	2
expobiome_smorf_02855747							6.51546e+06	1
expobiome_smorf_02855850																																			3.56958e+07	1							9.82289e+06	1
expobiome_smorf_02855945							2.08553e+07	1													2.27171e+08	3									3.21707e+08	3					1.12626e+08	2	1.66323e+07	1			8.34966e+06	1	1.05268e+07	1			8.10334e+07
expobiome_smorf_02856099	4.72668e+07	1	4.62531e+07	1					1.12306e+08	1			2.91015e+07	1	1.06097e+08	1															8.34132e+07	1	4.00847e+07	1	7.5911e+06	1	2.42368e+07	1			1.50407e+07	1			2.1637e+07	1	4.25335e+07	1
expobiome_smorf_02856460
expobiome_smorf_02856514			5.12345e+07	1																					3.49298e+07	1	1.03135e+07	1			1.48215e+07	1	2.13361e+07	1	9.148e+06	1					8.15265e+06	1
expobiome_smorf_02856515																																									1.35981e+08	1
expobiome_smorf_02856598																															7.6103e+06	1																	1.14846e+07
expobiome_smorf_02856665			3.93715e+07	3			2.79514e+08	4			1.63104e+08	3			1.72306e+08	2					9.97079e+06	1			1.1088e+08	2	1.99356e+08	2							3.08772e+07	1			3.95003e+08	4			1.4632e+08	3	1.29837e+07	1			1.85347e+08
expobiome_smorf_02856666	2.77826e+07	2	2.31847e+07	2			1.4911e+07	1			5.70688e+06	1													6.96306e+06	1	5.65846e+07	3							2.50649e+07	2			3.49774e+07	3			1.96139e+07	2					5.38928e+07
expobiome_smorf_02856668	4.71624e+08	3	3.28403e+08	3			3.60148e+08	2			3.7031e+08	3			3.85947e+08	3			3.84855e+07	1					1.60177e+08	2	3.91332e+08	2							1.37768e+08	1			3.00748e+08	3			4.55972e+08	3	6.03487e+07	2
expobiome_smorf_02856976							3.2143e+07	1											1.40654e+07	1
expobiome_smorf_02856977																	4.69361e+07	1	6.10093e+07	1			2.75974e+07	1					1.19594e+08	1	1.43871e+08	1									1.07939e+08	1
expobiome_smorf_02857017	6.41303e+07	1	3.82274e+07	1					1.28871e+08	1	3.31429e+07	1					3.51429e+07	1									9.58441e+07	1			5.95549e+07	1	1.99247e+07	1					5.71463e+07	1	3.63079e+07	1	8.71611e+07	1
expobiome_smorf_02857435							1.90369e+07	2
expobiome_smorf_02857477											1.2071e+07	1																																	3.92329e+07	1
expobiome_smorf_02857564													2.67691e+07	2			4.88255e+06	1
expobiome_smorf_02857671	1.70183e+07	1																	1.66356e+07	1													1.17226e+07	1					3.05895e+07	1							2.95539e+07	1
expobiome_smorf_02857679	1.2041e+08	1							1.70875e+07	1	1.70691e+08	1			9.00291e+07	1	6.12623e+07	1					1.81277e+08	1	2.71654e+07	1	2.78813e+07	1	4.01349e+06	1	5.54696e+07	1	7.07145e+07	1	4.92684e+07	1					1.98051e+07	1	7.38069e+07	1	7.29149e+07	1
expobiome_smorf_02857815	1.58578e+08	3	1.25463e+08	4	2.86636e+06	1							1.28556e+07	1			6.84666e+07	2			9.21544e+06	1			6.30219e+06	1	6.84051e+06	1					2.42802e+07	1	2.92063e+07	2			3.1821e+06	1	3.80417e+06	1	1.21988e+06	1	1.40236e+07	2	2.25146e+07	2
expobiome_smorf_02858035							3.2905e+06	1	8.51414e+06	1									1.31026e+07	1			3.49311e+06	1			5.68437e+06	1			1.04558e+07	1
expobiome_smorf_02858069							1.07853e+07	1
expobiome_smorf_02858105
expobiome_smorf_02858208													8.43349e+06	1																																	3.06913e+06	1
expobiome_smorf_02858911																																	3.6642e+06	1
expobiome_smorf_02859090											3.60323e+07	2	1.32413e+07	1
expobiome_smorf_02859182											3.62635e+06	1			474865	1	1.60295e+07	1													1.41687e+06	1							2.80073e+06	1					4.38046e+06	1
expobiome_smorf_02859295																																							4.47528e+06	1									5.61882e+06
expobiome_smorf_02859300	2.38612e+08	4	3.75897e+07	1							9.83307e+07	1			1.91222e+07	1					1.87237e+07	1			5.7695e+07	1	3.65412e+08	3											1.38479e+08	2			1.00325e+08	2	3.54271e+07	1	3.60091e+07	1
expobiome_smorf_02859301	3.16011e+08	2	1.82727e+08	3			4.25181e+08	3			1.2693e+08	2			3.86767e+08	3			5.60132e+07	1					3.87778e+08	3	3.29659e+08	2							9.45134e+07	1							1.80325e+08	1	5.05264e+07	1			3.35666e+08
expobiome_smorf_02860043																																									5.50003e+07	1
expobiome_smorf_02860888	7.70719e+06	1							3.41462e+07	1											7.22999e+06	1					1.61634e+07	1					1.59444e+07	1					1.17054e+07	1
expobiome_smorf_02861088	3.24534e+08	1	2.8871e+06	1			1.62521e+08	1							6.50852e+07	1			2.47338e+07	1			8.26977e+07	1			1.69918e+08	1					1.8497e+08	1			5.35895e+07	1	6.15109e+07	1					3.69564e+08	1			6.84946e+07
expobiome_smorf_02861090											7.57076e+06	1
expobiome_smorf_02861418																			3.22785e+07	1											1.00814e+07	1	4.56123e+07	1			2.15882e+07	1
expobiome_smorf_02861525			1.6344e+07	1	5.92647e+07	1			1.96496e+07	1	2.68971e+07	1	2.80913e+07	1																	7.49575e+07	2			8.52283e+07	2	1.20582e+07	1			1.61355e+07	1	2.21322e+07	2			1.14509e+07	1	1.63829e+07
expobiome_smorf_02861616			4.61491e+07	1			1.16296e+08	1							8.2342e+07	1									1.87437e+09	1													6.96717e+07	1			3.1126e+07	1					4.60127e+07
expobiome_smorf_02862071													7.21129e+06	1			4.54143e+06	1																													3.11016e+06	1
expobiome_smorf_02862294
expobiome_smorf_02862356																															2.06466e+07	1	1.04846e+07	1	6.26791e+07	2							1.25697e+07	1
expobiome_smorf_02862572	3.51766e+07	2					1.63409e+07	1																									2.14695e+07	1			1.51629e+07	1			1.27304e+07	1			3.87646e+06	1
expobiome_smorf_02862574	3.60397e+07	1					2.08157e+07	1			4.78005e+07	1													1.80131e+07	2			6.10663e+06	1							6.03725e+07	2
expobiome_smorf_02862630
expobiome_smorf_02862697			2.99046e+07	1					5.3291e+07	1	2.83129e+07	1			9.7378e+06	1	1.15434e+08	1	2.65034e+07	1	1.14287e+07	1			4.22045e+07	1	7.17551e+07	1			5.28834e+07	1	2.55581e+07	1											4.86223e+07	1			5.53913e+07
expobiome_smorf_02863142											1.50414e+08	3					3.46393e+07	1	2.86581e+07	2					1.30124e+07	1	6.97822e+07	2			9.91378e+07	2	1.1448e+07	1	2.69876e+07	2	7.72331e+07	3	6.8093e+07	3									2.06484e+07
expobiome_smorf_02863144																	8.2909e+06	1																							1.36052e+07	1							1.66462e+07
expobiome_smorf_02863145	4.24788e+07	1																					1.12778e+08	1			3.10163e+07	1			3.75899e+06	1	1.95577e+07	1											1.86007e+07	1
expobiome_smorf_02863293							9.22401e+07	1							5.67724e+07	1			1.00156e+07	1	2.75152e+07	1									8.37748e+07	1					9.65168e+07	2	1.05409e+07	1	1.08636e+08	1			1.72573e+07	1			9.92071e+07
expobiome_smorf_02863822	4.33908e+07	1	1.27562e+08	2							1.0627e+08	2	1.51731e+07	1	1.26759e+07	1									1.01789e+07	1					3.8893e+07	1	1.74327e+07	1	2.15237e+07	1					3.6382e+07	2
expobiome_smorf_02864346							1.09329e+07	1			1.5452e+07	2					1.98964e+07	1									5.21057e+06	1									7.76156e+06	1							3.04605e+06	1
expobiome_smorf_02864347			2.1886e+07	1							4.5253e+07	1					2.93266e+08	2																			4.34928e+07	2
expobiome_smorf_02864564																	1.36951e+07	1
expobiome_smorf_02864565	8.78176e+06	1									1.55019e+07	1	3.71094e+07	1													2.43042e+07	2			3.09966e+07	2	1.72159e+07	1							2.63359e+07	1
expobiome_smorf_02864567											1.17492e+07	1
expobiome_smorf_02864933	2.9918e+07	1					7.42387e+06	1			4.83212e+07	1	8.69046e+07	2																							4.57499e+07	2					7.48724e+06	1	1.37928e+07	1
expobiome_smorf_02865162	1.67357e+07	1	1.15958e+07	1					1.37096e+08	1							1.43316e+08	1					1.81757e+07	1							6.53643e+07	1	6.75965e+07	1	3.06969e+07	1									8.4877e+07	1
expobiome_smorf_02865348	1.6098e+08	3	3.96713e+06	1					7.34408e+06	1	6.75374e+07	2	9.85604e+06	1																											6.10276e+06	1			3.35629e+07	2
expobiome_smorf_02865427					3.07281e+07	1
expobiome_smorf_02865473	7.33299e+06	1	1.61167e+08	1					1.033e+07	1	5.44347e+07	3			8.07097e+06	1	4.12226e+07	3													3.69512e+07	1	6.46746e+07	1			1.44776e+07	1					2.21749e+07	1	4.01415e+08	2	2.09803e+07	1
expobiome_smorf_02865657	3.47544e+07	2									6.22203e+07	2	2.07911e+07	1	1.30338e+07	1	6.9727e+06	1			1.93388e+07	1					3.11089e+07	2					1.36009e+07	1	1.66258e+07	1	2.57991e+07	1			3.08539e+07	1							1.89251e+07
expobiome_smorf_02865762			5.90954e+06	2									4.78991e+06	1	7.54407e+06	1	9.30691e+06	1									1.35759e+07	1							1.69853e+07	2			4.44603e+06	2
expobiome_smorf_02865774																																	5.65127e+07	1
expobiome_smorf_02866304			5.94559e+07	1							1.73671e+07	1																							1.59784e+07	1							1.10394e+07	1
expobiome_smorf_02866915			3.47966e+07	1	3.19556e+07	1			1.19794e+07	1	1.79054e+08	2					1.59965e+08	1	3.26409e+07	1					3.22007e+06	1	5.29199e+07	1			5.47901e+07	1	1.00187e+07	1	1.95793e+07	1	4.92352e+07	1	7.26348e+07	3	8.67236e+07	2			5.41739e+07	1	2.72589e+07	1	1.02393e+08
expobiome_smorf_02867074			5.03286e+06	1																							2.27149e+07	1					6.98583e+06	1
expobiome_smorf_02867207											5.38785e+06	1
expobiome_smorf_02867357
expobiome_smorf_02867363									2.54664e+07	2																	5.8671e+06	1			1.43691e+07	1	3.33347e+07	2					3.95534e+06	1
expobiome_smorf_02868239	1.25995e+07	1	4.49908e+07	1					4.79738e+07	1	1.78714e+07	1											3.26043e+07	1	7.49979e+07	1	2.4755e+07	1					1.03389e+07	1											8.67687e+06	1	3.7302e+07	1	1.69902e+07
expobiome_smorf_02868500																					2.40112e+07	1	1.4194e+08	1							7.64484e+07	1	5.53228e+07	1									3.47112e+08	2
expobiome_smorf_02868885																	1.1808e+07	1
expobiome_smorf_02869318															2.66833e+06	1									2.22664e+07	1							1.85104e+07	1															3.88538e+07
expobiome_smorf_02869329			1.86981e+07	1							9.76279e+06	1																					3.4579e+06	1
expobiome_smorf_02869365			3.56002e+07	1					1.13466e+07	1			3.00205e+07	1																											5.65059e+07	1			5.23899e+07	1
expobiome_smorf_02869372			1.39734e+07	2					6.05967e+06	1																																			7.37377e+06	1
expobiome_smorf_02869506																													1.95737e+07	1
expobiome_smorf_02870686																																									1.34535e+07	1					1.18258e+07	1
expobiome_smorf_02870735									2.98118e+07	1	9.64787e+07	3	6.00774e+07	4			8.41566e+06	1			3.61614e+07	3							2.36691e+07	1	5.83443e+07	3			3.49084e+07	2					1.29195e+08	4			7.79002e+06	1
expobiome_smorf_02871008																																									5.0953e+06	1
expobiome_smorf_02871014																																	4.49438e+07	1
expobiome_smorf_02871523
expobiome_smorf_02871588	4.894e+08	5					8.23507e+08	3	5.12092e+07	3	1.69184e+09	6			3.10972e+07	1	6.06803e+08	2	1.64918e+08	2					6.76996e+07	2	2.20914e+07	1			1.83482e+08	3	9.50499e+08	6	1.01592e+08	3	1.11581e+09	4	6.01172e+07	1			1.91893e+08	3	2.7785e+08	4	2.27488e+07	1	2.97548e+08
expobiome_smorf_02871592	7.43904e+06	1																															1.72614e+07	1			1.74301e+07	1			3.35831e+07	1	1.07693e+07	1	1.40032e+07	1			1.49893e+07
expobiome_smorf_02871630	5.52372e+06	1
expobiome_smorf_02871631											1.85048e+07	1																													1.96515e+07	1
expobiome_smorf_02871688			2.0404e+07	1	1.68945e+07	1	1.42813e+07	1	5.25227e+07	1					2.35803e+07	1					5.00784e+07	2													1.52153e+07	1					1.11025e+07	1	2.04466e+07	1					1.208e+07
expobiome_smorf_02871896																	9.72492e+06	1
expobiome_smorf_02871935	4.86195e+07	2	6.39445e+07	1			2.12234e+08	3			2.53467e+08	2			2.64393e+07	1									1.36398e+07	1	1.95346e+08	3											1.28067e+08	2					1.89165e+07	1	4.24304e+07	1
expobiome_smorf_02871936	8.33132e+06	1	8.63628e+06	1											6.76172e+06	1											9.42702e+06	1							9.8877e+06	1			4.91937e+06	1			7.34385e+06	1			5.53294e+06	1	6.29054e+06
expobiome_smorf_02872039
expobiome_smorf_02872473																																	7.87222e+07	1
expobiome_smorf_02872475																	7.62414e+07	1
expobiome_smorf_02872970															7.56093e+06	1																					8.0718e+06	1											6.55689e+07
expobiome_smorf_02873147					2.54839e+07	1
expobiome_smorf_02873165																																													4.55023e+06	1
expobiome_smorf_02873309			3.63912e+06	1													1.58594e+07	1
expobiome_smorf_02873338																			1.28131e+07	1													3.54239e+07	2
expobiome_smorf_02873368																											5.91603e+07	2							4.5286e+07	2							7.84816e+06	1			1.95071e+08	1
expobiome_smorf_02873526									1.79114e+07	1							1.30857e+08	1			3.44039e+07	1	4.11957e+07	1			4.17493e+07	1					4.71786e+07	2
expobiome_smorf_02873741																																					4.18149e+06	1
expobiome_smorf_02873871																			5.61132e+07	1
expobiome_smorf_02873941									1.04374e+07	1									2.94227e+07	2	5.2457e+06	1			2.17955e+07	1							3.38415e+07	2			5.81305e+06	1							4.51228e+06	1
expobiome_smorf_02874256	5.08649e+06	1															1.32489e+07	1
expobiome_smorf_02874410
expobiome_smorf_02875709																																							3.88301e+06	1
expobiome_smorf_02875815									2.61405e+07	1											1.46783e+07	1			1.0088e+08	3					7.37433e+06	1																	1.69498e+07
expobiome_smorf_02876003	6.01935e+06	1													8.68118e+06	1	1.20724e+07	1									6.66628e+06	1
expobiome_smorf_02876232
expobiome_smorf_02876233	1.66378e+08	1					1.25497e+08	1	8.74347e+07	1																					8.81036e+07	1	7.36585e+07	1			4.65504e+07	1							3.01243e+08	1
expobiome_smorf_02876327							4.72822e+06	1																															1.06471e+07	1
expobiome_smorf_02876450																											6.89501e+06	1			1.76898e+08	2											3.38589e+08	2			1.24008e+07	1	6.25449e+07
expobiome_smorf_02876741			1.13184e+07	1			2.28793e+07	1	7.5542e+06	1	5.91512e+07	2					8.81546e+07	2							5.4865e+07	2					9.54634e+06	1					5.60578e+06	1							6.48927e+06	1	4.5299e+06	1	5.87193e+07
expobiome_smorf_02876781	4.48894e+07	1	1.82685e+08	3			2.88186e+08	3							1.78247e+08	3			1.97825e+07	2	1.77962e+07	1			6.0334e+07	2	2.1588e+08	2							7.87507e+07	2			3.4346e+08	4			1.36853e+08	3	2.64225e+07	1	5.5888e+07	2
expobiome_smorf_02876787	1.27584e+07	1									7.52689e+06	1															1.3641e+07	1							6.9688e+06	2													1.82604e+07
expobiome_smorf_02876846	2.23776e+07	1																							1.5332e+07	1					1.54409e+07	1
expobiome_smorf_02877144																															3.27287e+07	2	999385	1
expobiome_smorf_02877207									8.18047e+07	1																							1.63038e+08	1
expobiome_smorf_02877432	4.97898e+07	1							7.64841e+07	1	1.708e+08	2	2.92298e+08	5	1.44578e+07	1							4.88778e+07	1			2.08877e+07	1			1.84263e+08	3													4.98766e+07	1
expobiome_smorf_02877602											1.00401e+08	1	7.85626e+07	1			3.24489e+08	3	4.0542e+07	1			2.78428e+07	1							1.4766e+08	1	5.45507e+07	1			9.9487e+07	1	1.94102e+08	2	7.91175e+07	1							3.96011e+07
expobiome_smorf_02877888							2.57868e+07	1																																									6.98642e+07
expobiome_smorf_02877958			2.31769e+07	1																																									4.31122e+06	1
expobiome_smorf_02878280									6.80478e+06	1	7.24853e+07	2							2.04767e+07	1			2.59362e+07	1	8.14393e+06	1	3.15467e+07	1			2.95635e+07	1	2.15357e+07	1	2.54389e+07	1	1.83526e+07	1	1.14249e+07	1	4.52535e+07	1							4.47102e+07
expobiome_smorf_02878457	4.1732e+06	1
expobiome_smorf_02878633
expobiome_smorf_02878643
expobiome_smorf_02878866			1.03498e+07	1							7.01718e+07	2									6.97361e+06	1					1.23196e+07	1			1.79833e+07	1											7.81599e+06	1
expobiome_smorf_02878945	6.68247e+07	1	6.95741e+06	1
expobiome_smorf_02879340							2.23241e+07	1																									2.81645e+08	3					4.71952e+07	1			7.73664e+07	1					5.99896e+07
expobiome_smorf_02879444									1.68752e+06	1			3.14426e+06	1					2.99289e+06	1					2.51454e+07	2
expobiome_smorf_02879497																	1.18311e+07	1							3.77654e+07	2									1.31803e+07	1							1.14895e+07	1	8.62046e+07	2
expobiome_smorf_02879626	5.93196e+06	1																							4.42087e+06	1																			8.65596e+06	1
expobiome_smorf_02879895			8.21808e+06	1											2.05596e+07	1									1.24341e+07	1	1.99378e+07	1							1.22098e+07	1			1.4251e+07	1			1.05901e+07	1
expobiome_smorf_02880012																									1.39402e+06	1
expobiome_smorf_02880105							1.54519e+06	1																									5.04068e+06	1
expobiome_smorf_02880438																			2.86776e+07	1
expobiome_smorf_02880804											1.03398e+07	1					1.44186e+07	1			7.85396e+06	1
expobiome_smorf_02881020																																	2.16562e+07	2
expobiome_smorf_02881148																			4.69716e+06	1																	5.40145e+06	1
expobiome_smorf_02881793																																									7.03945e+07	1							6.9588e+07
expobiome_smorf_02881823																																	8.38564e+06	1
expobiome_smorf_02881828							1.28285e+07	1	5.74143e+06	1	1.22229e+07	1			2.76331e+07	1																									8.75423e+06	1			3.70551e+07	2
expobiome_smorf_02881905	1.44491e+07	1	4.83943e+07	2					1.85219e+07	1	3.17909e+07	2																					9.0167e+06	1	7.48666e+06	1
expobiome_smorf_02882148
expobiome_smorf_02882532
expobiome_smorf_02882534																																													1.16838e+07	1
expobiome_smorf_02882537																																			6.68629e+06	1					1.9849e+07	1
expobiome_smorf_02882679	9.00417e+06	1
expobiome_smorf_02882807			1.67888e+08	2							1.47015e+07	1	7.71335e+06	1									1.5746e+07	2							1.6981e+07	1	6.88511e+07	1	2.15602e+07	1					2.54208e+07	1							1.01528e+07
expobiome_smorf_02883020	3.77197e+08	1	2.7459e+08	1			1.96192e+08	1	7.65708e+08	1	1.12561e+08	1	8.59682e+07	1			2.56922e+08	1			3.79012e+08	1	5.75906e+07	1	9.22191e+07	1	3.68192e+08	1			2.91503e+08	1	6.2315e+08	1			1.74996e+08	1	4.86778e+08	1	2.58808e+08	1	2.69049e+08	1	2.51208e+07	1	3.59139e+08	1	3.04816e+08
expobiome_smorf_02883036																															9.1485e+06	1	4.75018e+06	1											1.50192e+07	1
expobiome_smorf_02883055																																	7.39843e+06	1
expobiome_smorf_02883229											3.1704e+06	1																			7.49134e+06	1
expobiome_smorf_02883236	1.29017e+07	1					1.38639e+07	1	1.04856e+08	2	1.66821e+08	4	2.60274e+08	3																	1.28351e+08	2	1.11473e+08	2	3.51314e+07	1							3.93786e+07	1
expobiome_smorf_02883237											7.16641e+07	1																			4.21374e+07	1	2.61889e+07	1									5.49554e+07	1
expobiome_smorf_02883563																																			1.86173e+07	2
expobiome_smorf_02883566	9.69199e+06	1	7.62351e+06	1											2.56856e+07	1											1.78318e+07	1			9.05717e+06	1									1.74084e+07	1
expobiome_smorf_02883567									3.90389e+06	1																							6.25821e+06	1
expobiome_smorf_02883579			7.89019e+06	1																											2.89221e+07	2	1.09056e+07	1
expobiome_smorf_02884289																															2.40739e+08	1
expobiome_smorf_02884333			1.61526e+07	2																			2.35093e+07	2	1.70563e+07	2	1.02443e+07	2					4.28535e+06	1
expobiome_smorf_02885240											1.96067e+07	1																											2.76234e+07	1
expobiome_smorf_02885241							5.70775e+07	2			1.104e+07	1			1.24099e+07	1											5.33736e+07	1							1.52185e+08	1			1.04758e+08	2									2.777e+07
expobiome_smorf_02885283	1.69988e+07	1																																					2.53428e+06	1
expobiome_smorf_02885324
expobiome_smorf_02885381	2.63733e+08	3	2.18677e+08	3			6.59432e+08	6			4.26945e+08	3			1.19535e+08	1					2.45791e+08	3			2.11534e+08	3	6.78551e+08	4							3.10597e+08	4			4.21886e+08	3			2.70756e+08	3	8.51794e+07	2	3.33835e+07	1
expobiome_smorf_02885384	2.5271e+07	2	8.04106e+07	1			2.1754e+07	1			1.22092e+08	2			6.87584e+07	1									5.71618e+07	1	1.10829e+08	1											2.55795e+08	2			1.23654e+08	2	4.72203e+07	1	7.69326e+07	1
expobiome_smorf_02885509											5.35195e+06	1					1.46891e+07	1
expobiome_smorf_02885922					1.82133e+07	1																											5.23912e+07	1
expobiome_smorf_02886464
expobiome_smorf_03175781																																	8.81809e+07	1
expobiome_smorf_03176670																																	7.07362e+06	1
expobiome_smorf_03183250
expobiome_smorf_03197546													5.92943e+07	1																													6.40094e+07	1
expobiome_smorf_03211163
expobiome_smorf_04054648																															6.41719e+08	5									1.52062e+08	2
expobiome_smorf_04062976																															4.99894e+08	4	6.43445e+06	1
expobiome_smorf_04421604																																	8.90963e+06	1
expobiome_smorf_04871916																																	1.76858e+07	1
expobiome_smorf_05587472																																	2.78314e+07	1
expobiome_smorf_05589114																																	1.69656e+07	1
expobiome_smorf_05594117																																	1.29993e+07	1
expobiome_smorf_05599411																															1.02506e+08	1	1.68499e+08	1
expobiome_smorf_05603701																																	4.06791e+07	1
expobiome_smorf_05605736																																	7.35785e+07	1
expobiome_smorf_05609498																																	3.14365e+07	1
expobiome_smorf_05614080																																	1.64797e+07	1
expobiome_smorf_05615581																																	8.75681e+07	3
expobiome_smorf_05617523																																	4.50685e+07	1
expobiome_smorf_05619644																															3.81196e+07	2
expobiome_smorf_05620696																																	8.12012e+07	1
expobiome_smorf_05627167																															3.14131e+07	1
expobiome_smorf_05627319																															1.84567e+07	1	6.53477e+06	1
expobiome_smorf_05632311																																	5.01742e+06	1
expobiome_smorf_05634255																																	3.88215e+06	1
expobiome_smorf_05637786																															1.32565e+08	1
expobiome_smorf_05638887																																	2.0656e+07	1
expobiome_smorf_05640174																															2.21228e+07	2	2.53221e+07	2
expobiome_smorf_05640863																																	9.94082e+07	1
expobiome_smorf_05643027																																	3.46719e+07	1
expobiome_smorf_05644239																																	4.8383e+07	1
expobiome_smorf_05646393																																	1.29161e+07	1
expobiome_smorf_05646663																																	1.01481e+07	1
expobiome_smorf_05646901																															2.29694e+07	1	5.4552e+07	1
expobiome_smorf_05648503																																	3.58683e+06	1
expobiome_smorf_05649025																																	2.35433e+07	1
expobiome_smorf_05746459																																	1.25512e+07	1			2.08463e+07	3			8.17822e+06	1
expobiome_smorf_05767550																																	2.27476e+06	1
expobiome_smorf_05796125																															1.82322e+08	1	4.1593e+08	2
expobiome_smorf_05799408																																	8.0106e+06	1
expobiome_smorf_06009014											2.04443e+08	2					9.06043e+07	1			1.13083e+07	1											7.36313e+07	1									2.59398e+07	1
expobiome_smorf_06023609																																																	1.04859e+08
expobiome_smorf_06025435																											1.15016e+07	1
expobiome_smorf_06039482																															6.81543e+06	1			3.51161e+07	1
expobiome_smorf_06051774
expobiome_smorf_06053563											5.26511e+07	2																													1.78371e+07	1
expobiome_smorf_06057848															5.0724e+06	1							9.45736e+06	1			7.76956e+06	1
expobiome_smorf_06071554																											2.82387e+08	2									2.24947e+07	2
expobiome_smorf_06072233																									9.2775e+07	1																			1.24286e+07	1
expobiome_smorf_06384147																															9.07098e+07	2
expobiome_smorf_06776954																																	2.76758e+07	1
expobiome_smorf_06812799											5.77697e+07	1													1.03324e+07	1													1.2284e+07	1
expobiome_smorf_06841945
expobiome_smorf_06844276																	3.26057e+07	1																											1.6596e+07	1
expobiome_smorf_06853635					5.41943e+07	1	4.30933e+07	1																															9.00851e+06	1	1.1981e+08	1					7.59102e+07	1
expobiome_smorf_06858240													1.81008e+07	1
expobiome_smorf_06862885					5.05981e+06	1					7.56026e+07	5	4.2185e+07	3	7.49069e+07	2									1.30846e+07	2	5.20425e+07	3									1.09639e+07	1					2.75473e+07	1
expobiome_smorf_06869775																																													1.17782e+07	1
expobiome_smorf_06870223							1.48049e+07	1			8.32985e+07	3					1.27727e+07	1
expobiome_smorf_06870744																															1.47e+07	1	4.18348e+07	1											4.66514e+07	1
expobiome_smorf_06878471					1.12483e+07	1	7.86028e+07	2			1.3289e+08	3			4.4191e+08	2									3.20799e+08	2	1.79627e+08	1			1.30606e+08	2							7.23194e+07	1	1.9293e+08	2					5.80912e+08	3
expobiome_smorf_06878481					6.25381e+07	1	3.09088e+07	1			6.26216e+07	1			2.54802e+08	1					1.53462e+08	2			1.871e+08	2	1.60433e+08	1			8.38609e+07	1	9.60105e+07	3	3.89644e+07	1			1.60728e+07	1							7.63636e+08	3	1.57909e+07
expobiome_smorf_06881185																																					1.33501e+07	1
expobiome_smorf_06937042																															1.24335e+08	4	2.09653e+07	1
expobiome_smorf_07030756
expobiome_smorf_07034184																									9.47015e+06	1									1.88657e+07	1									4.69465e+07	1
expobiome_smorf_07034394																																							9.94469e+06	1
expobiome_smorf_07038363																					2.1029e+07	2			2.96839e+07	1															4.37549e+07	2
expobiome_smorf_07039545																																											1.46511e+07	1
expobiome_smorf_07040702
expobiome_smorf_07040717																																													6.22548e+06	1
expobiome_smorf_07042225													7.4221e+06	1													7.15678e+07	4
expobiome_smorf_07047157																																															2.10036e+08	1	2.01737e+07
expobiome_smorf_07047563															3.4277e+06	1																											1.6587e+06	1			1.20108e+07	1	1.73903e+07
expobiome_smorf_07053135																	2.60975e+07	1
expobiome_smorf_07054075													1.32086e+07	1											9.97868e+06	1
expobiome_smorf_07055787																																					1.93488e+07	1
expobiome_smorf_07057757																																																	5.79564e+06
expobiome_smorf_07059651							2.70616e+07	1	5.42116e+06	1																							3.86424e+07	1									3.413e+06	1
expobiome_smorf_07060607																					1.60195e+07	1			1.29297e+07	1			2.12399e+07	1					3.83158e+07	1											1.50973e+07	1
expobiome_smorf_07064132																																									1.36825e+07	1
expobiome_smorf_07064162																											2.47781e+07	1			3.25182e+07	1	5.11842e+07	1					1.97679e+07	1			2.15381e+07	1
expobiome_smorf_07073177															4.07179e+06	1																																	5.09381e+06
expobiome_smorf_07074911									2.00894e+06	1																							8.20998e+06	1
expobiome_smorf_07075182
expobiome_smorf_07488798
expobiome_smorf_07501078																																	1.76349e+07	1
expobiome_smorf_07520191
expobiome_smorf_07592055																															4.88076e+07	2	3.30629e+07	3					1.75471e+07	2
expobiome_smorf_07948121																			5.24769e+06	1							1.33477e+07	1
expobiome_smorf_08292027																																	2.10751e+07	1
expobiome_smorf_08761968																							8.24164e+06	1																	8.70407e+07	1
expobiome_smorf_08764465																							2.64943e+07	2							8.79948e+07	1	5.86664e+07	1									1.07866e+08	1
expobiome_smorf_08767102
expobiome_smorf_08768828																							1.35654e+07	1																	8.30067e+07	3
expobiome_smorf_08769465
expobiome_smorf_08772504																							6.50949e+07	2							6.58176e+07	3
expobiome_smorf_08776814
expobiome_smorf_08776863																															4.46491e+07	1									4.82314e+07	2							2.29381e+07
expobiome_smorf_08779208																																	1.04303e+07	1
expobiome_smorf_08779428																															4.91012e+08	4									1.21706e+08	3							1.19266e+06
expobiome_smorf_08780748
expobiome_smorf_08782039
expobiome_smorf_08790489																							4.63161e+07	1							1.78248e+07	1											1.69109e+07	2
expobiome_smorf_08797241
expobiome_smorf_08797690
expobiome_smorf_08798475											2.4826e+06	1					6.29732e+07	1
expobiome_smorf_08799536																					1.23732e+07	1	4.79037e+07	1							4.70491e+07	1	1.75353e+07	1									1.08523e+08	1
expobiome_smorf_08800538																															8.80014e+08	4																	2.83347e+07
expobiome_smorf_08801778																															3.17473e+06	1											1.26224e+07	1
expobiome_smorf_08802285							4.17121e+07	1																							1.33887e+07	1	1.77719e+07	1			3.65719e+07	1
expobiome_smorf_08803072											9.55179e+06	1					4.83303e+07	1
expobiome_smorf_08803767																																															5.24371e+07	1
expobiome_smorf_08803853																	6.84187e+07	1																											3.18459e+07	1
expobiome_smorf_08807574																																	1.24973e+07	1
expobiome_smorf_08809118
expobiome_smorf_08809579																															1.65477e+08	2	3.48701e+07	1							9.44747e+07	1							6.8966e+07
expobiome_smorf_08819869																							7.56006e+07	2																			1.90958e+07	1
expobiome_smorf_08826027																															2.16993e+07	2
expobiome_smorf_08826447											8.51054e+06	1											1.03986e+08	2							4.03857e+07	2			1.82163e+07	1							8.73357e+07	2
expobiome_smorf_08826583																																	2.23415e+08	1
expobiome_smorf_08831179																																															3.43063e+07	1
expobiome_smorf_08832196																							1.21295e+08	3									1.6086e+07	2									7.16891e+07	3
expobiome_smorf_08832591																																	4.45714e+07	1	1.0341e+07	1
expobiome_smorf_08834156
expobiome_smorf_09352192																																	6.80044e+07	2							2.05702e+07	1
expobiome_smorf_09355229																					4.86489e+07	2					6.46005e+07	1			1.99899e+08	2	4.56223e+07	2	5.88393e+08	2	1.17499e+08	1	4.74742e+08	2	2.9068e+08	2							5.04211e+06
expobiome_smorf_09358768																																	6.50567e+06	1
expobiome_smorf_09361418
expobiome_smorf_09367556
expobiome_smorf_09369057																							1.98754e+07	1
expobiome_smorf_09375773
expobiome_smorf_09378715									3.68346e+07	1	1.15977e+07	1	5.89556e+06	1																			1.36725e+07	1	1.77999e+07	1							7.69782e+06	1
expobiome_smorf_09380476																																			1.87616e+07	1			1.2412e+08	3
expobiome_smorf_09394477					2.53853e+07	1																					7.07048e+06	1													2.89517e+07	1
expobiome_smorf_09402286																																	7.50039e+06	1
expobiome_smorf_09402669
expobiome_smorf_09403919									3.13564e+07	1																	2.47868e+07	1									4.08122e+07	2	1.78506e+07	1
expobiome_smorf_09406505																																									1.21953e+08	1
expobiome_smorf_09408869																							2.15179e+06	1
expobiome_smorf_09409277											5.87009e+06	1
expobiome_smorf_09414857									4.98371e+07	2																															1.62531e+07	1					9.57879e+06	1
expobiome_smorf_09422307
expobiome_smorf_09776125																																	3.09235e+07	2
expobiome_smorf_09810197																																	1.40096e+07	1
expobiome_smorf_10167656											2.08383e+08	5																							1.00467e+08	2			8.02966e+07	2
expobiome_smorf_10168997									3.93003e+07	1																					3.00837e+07	1
expobiome_smorf_10178899																	3.54968e+06	1																							4.90589e+07	2
expobiome_smorf_10191813
expobiome_smorf_10482432																									3.30661e+07	2											5.42126e+06	1
expobiome_smorf_10505030															8.87848e+07	1															2.41481e+08	1	6.20355e+07	1
expobiome_smorf_10516609																																	3.05782e+07	1
expobiome_smorf_10524283																																			1.3839e+07	1					1.92615e+08	4
expobiome_smorf_10531904
expobiome_smorf_10547448
expobiome_smorf_11145317																																																	8.74301e+06
expobiome_smorf_11177640																									3.43952e+07	1
expobiome_smorf_11180891																											4.85724e+07	1					2.03962e+07	1
expobiome_smorf_11196933					1.71575e+07	2
expobiome_smorf_11490247																															1.22245e+07	1
expobiome_smorf_11598111																																											6.33527e+07	1
expobiome_smorf_11609361																																	2.49966e+07	1
expobiome_smorf_11613769																																	8.30738e+07	3
expobiome_smorf_11880990
expobiome_smorf_12210126							1.19029e+07	1			2.97605e+07	2					1.01182e+07	1	1.57985e+07	1											4.48171e+07	1									2.03526e+07	1			9.90821e+06	1			9.86283e+06
expobiome_smorf_12211265			1.50835e+07	1					1.10544e+07	1													4.70178e+06	1
expobiome_smorf_12211267									1.22948e+07	1													6.90884e+06	1
expobiome_smorf_12211730
expobiome_smorf_12211855
expobiome_smorf_12213104																																													1.1699e+07	1
expobiome_smorf_12213268																																													1.01627e+07	1
expobiome_smorf_12213503																																					2.15483e+07	1
expobiome_smorf_12213548	1.80847e+07	2																													3.05995e+07	2	4.19523e+06	1									2.65704e+06	1
expobiome_smorf_12213593	4.55306e+07	1
expobiome_smorf_12214033											6.5455e+06	1					7.12198e+06	1					8.33629e+06	1	3.54277e+06	1	1.45651e+07	1			8.62828e+06	1	4.91001e+06	1
expobiome_smorf_12214435							1.19618e+07	1									6.29608e+06	1													1.74555e+07	1			3.05201e+07	1									6.50754e+06	1
expobiome_smorf_12214662																	6.49413e+06	1																							8.24789e+06	1
expobiome_smorf_12215011									3.76106e+07	1	3.74934e+08	2	4.24932e+07	1			1.79609e+08	3	9.78729e+07	1							5.55227e+07	1									1.18167e+08	1
expobiome_smorf_12215970	1.41788e+07	1							2.54419e+07	1									7.41259e+06	1	2.89477e+07	1	2.33377e+07	1																					1.29963e+07	1
expobiome_smorf_12216098																															1.191e+07	1
expobiome_smorf_12216256	3.55492e+07	1											2.07564e+07	1	2.38935e+07	1									3.39974e+07	1					2.70476e+07	1					1.16778e+07	1			1.63105e+07	1							1.42689e+07
expobiome_smorf_12216671	4.14975e+07	1											1.9395e+07	1																													1.44162e+07	1
expobiome_smorf_12216826																	3.57089e+07	1
expobiome_smorf_12217799																															2.88832e+07	1									3.50675e+07	1			7.81663e+07	1			4.7365e+07
expobiome_smorf_12217801	1.55599e+07	1	1.3106e+07	1																			1.6844e+07	1	4.8805e+07	1					5.63915e+07	2	2.78929e+07	1							4.71768e+07	2			5.63307e+06	1
expobiome_smorf_12217876											8.51035e+06	1			3.29052e+07	2							2.21253e+07	1	5.26185e+07	2															6.37171e+06	1			6.89783e+07	2	3.23358e+06	1	6.19006e+07
expobiome_smorf_12218035													1.82314e+07	1																													1.19229e+07	1
expobiome_smorf_12220763	5.99781e+07	1					2.04551e+08	3	1.87326e+08	3			7.64524e+07	3					2.32326e+07	1			1.21739e+08	3	2.6018e+07	2	6.46298e+07	2	1.41852e+08	3			4.14225e+07	2											1.2122e+07	1			6.81054e+06
expobiome_smorf_12220842	1.42428e+07	1							6.20295e+06	1
expobiome_smorf_12220856									1.18414e+07	1																	5.78478e+06	1			3.80915e+06	1							2.86264e+06	1
expobiome_smorf_12221234																	8.77189e+06	1
expobiome_smorf_12221304	5.0022e+06	1					1.23739e+07	1							3.58551e+07	1									5.07322e+07	1	4.30836e+06	1					3.51283e+07	1
expobiome_smorf_12221306
expobiome_smorf_12221307																	2.69074e+08	1							2.4106e+07	1																			1.85658e+07	1
expobiome_smorf_12221644							1.98384e+07	1
expobiome_smorf_12221898			1.24933e+07	1			1.46073e+07	1			2.1666e+07	1																							2.49629e+06	1
expobiome_smorf_12222408																									2.19435e+06	1
expobiome_smorf_12222928	6.89991e+06	1									3.04688e+08	1					1.35124e+08	4									7.71143e+06	1							6.47022e+06	1	4.71513e+06	1
expobiome_smorf_12223316	1.652e+08	2							3.03531e+07	1					1.27706e+07	1					5.61093e+06	1			1.2009e+07	1					1.0587e+08	1	1.00892e+07	1											6.22949e+07	1
expobiome_smorf_12223539	7.26185e+07	1	1.06741e+08	1							3.42729e+07	1
expobiome_smorf_12223540
expobiome_smorf_12223571	8.20584e+07	1							8.27963e+07	1	2.72922e+07	1	6.40394e+07	1									5.04398e+07	1			4.98939e+07	1			8.50911e+06	1	5.04948e+07	1					2.23251e+07	1			1.28477e+07	1	6.40446e+07	1	1.58891e+07	1
expobiome_smorf_12223921									5.18638e+06	1
expobiome_smorf_12224034
expobiome_smorf_12225688																															3.08441e+07	1
expobiome_smorf_12225689	8.64502e+06	2
expobiome_smorf_12226161											2.07027e+07	2
expobiome_smorf_12226737																									1.11403e+07	1
expobiome_smorf_12227121																			7.3272e+06	1
expobiome_smorf_12227126	7.94812e+06	1
expobiome_smorf_12227649																																	9.2942e+06	1											6.93943e+06	1
expobiome_smorf_12228298			1.41667e+07	1							6.63122e+07	3					1.70579e+07	2																			1.89653e+07	1							4.74428e+07	1
expobiome_smorf_12228299																	4.22198e+07	1
expobiome_smorf_12228302																	6.45239e+07	1
expobiome_smorf_12228346	6.17924e+06	1
expobiome_smorf_12228637																							4.9798e+06	1
expobiome_smorf_12229221															1.59968e+07	1	3.64802e+06	1							2.26849e+07	1																			1.21257e+07	1
expobiome_smorf_12229365																																	2.60806e+07	1
expobiome_smorf_12229387							6.58778e+07	2	9.26588e+06	1	8.27358e+07	2	6.66142e+07	1			3.92007e+07	1			4.03163e+07	1							2.10725e+07	1							4.53498e+07	2			8.46901e+07	1
expobiome_smorf_12229500	1.24548e+07	1	7.22286e+06	1																											1.22002e+07	1							1.13183e+07	1	1.54551e+07	1			1.9913e+07	1
expobiome_smorf_12229997	1.97432e+08	3
expobiome_smorf_12230425							9.36064e+07	1											6.5737e+07	1																	1.85536e+08	1					9.5417e+07	1			2.72814e+08	1
expobiome_smorf_12230858
expobiome_smorf_12231435	2.76295e+07	1																									7.4416e+07	1			1.54302e+07	1
expobiome_smorf_12231534	1.10697e+08	1																											5.80358e+06	1	2.02261e+08	2	8.47757e+07	2
expobiome_smorf_12233228																																													5.85167e+06	1
expobiome_smorf_12233784																															4.94585e+07	1	7.47086e+07	1
expobiome_smorf_12234338	8.5416e+06	1
expobiome_smorf_12237326									1.24233e+07	1	1.24788e+07	1					2.82652e+06	1
expobiome_smorf_12237403
expobiome_smorf_12237781
expobiome_smorf_12237883													8.50131e+06	1							2.45678e+07	1									3.41578e+07	1			2.26002e+08	3									9.26332e+07	2			8.07691e+07
expobiome_smorf_12238203
expobiome_smorf_12238386
expobiome_smorf_12239444
expobiome_smorf_12239445																															2.15016e+07	1	4.4177e+07	1
expobiome_smorf_12239526	1.2385e+07	1																													1.20786e+07	1
expobiome_smorf_12239751	4.63884e+07	2																																	3.3548e+07	1	1.90515e+07	1
expobiome_smorf_12240985																															8.07527e+07	1					3.27652e+07	1											5.38883e+07
expobiome_smorf_12241160																																													2.07864e+07	1
expobiome_smorf_12242104			1.96794e+07	1							5.44218e+07	2	1.0923e+07	1													4.55687e+07	1											1.40898e+07	1
expobiome_smorf_12242114	7.12545e+07	1											3.05101e+07	1													4.97845e+07	1																	9.25243e+07	1
expobiome_smorf_12242618																																			6.99977e+06	1					5.56754e+07	3
expobiome_smorf_12243663
expobiome_smorf_12243776															5.73038e+06	1	4.35756e+07	1													1.59394e+07	1									1.90138e+07	3
expobiome_smorf_12244294			1.30821e+07	1																			3.33522e+06	1									7.12735e+06	1							3.15705e+06	1
expobiome_smorf_12244403	2.67239e+07	1					1.75503e+07	1			2.93086e+07	1													3.33009e+07	1	2.59068e+07	1																	2.08642e+07	1
expobiome_smorf_12244611	4.11401e+07	1					3.09051e+07	1									3.76214e+07	2			9.13829e+07	2			1.09015e+07	1	1.32173e+07	1			2.6929e+07	1	1.92746e+08	2					7.03059e+07	2	6.08399e+07	1
expobiome_smorf_12246621	1.5046e+07	1									1.23446e+07	1													1.59745e+07	1	1.77915e+07	1
expobiome_smorf_12247059	3.16187e+07	2																			1.81293e+07	1					8.209e+07	2			9.39896e+06	1	1.67929e+07	1			1.23774e+07	1	7.0906e+07	2	1.2234e+07	1	2.46086e+07	1			1.09368e+07	1
expobiome_smorf_12247302											1.80934e+07	1
expobiome_smorf_12248148	2.48973e+07	1																													3.77577e+07	1	3.61707e+07	1
expobiome_smorf_12249559																																									1.20868e+07	1
expobiome_smorf_12249561	5.47269e+07	1							3.76033e+07	2			2.82566e+07	1									4.91168e+07	2			2.98752e+07	1																	6.60185e+07	2
expobiome_smorf_12250027	6.98621e+06	1					1.6947e+07	1											1.64955e+07	1																			2.31058e+07	2
expobiome_smorf_12250033	1.62432e+08	3	7.28875e+07	2									1.95709e+07	1	5.7446e+07	1									3.58785e+07	1	8.76865e+07	1	1.0248e+07	1	2.23948e+08	3			1.12833e+07	1			1.60515e+07	1			1.27892e+07	1			2.74973e+07	1	1.78543e+07
expobiome_smorf_12250036	5.3349e+07	2							1.11862e+07	1					7.7766e+07	3															2.11386e+07	1	1.8796e+07	1							4.21719e+07	1							5.85629e+06
expobiome_smorf_12250312																									3.05927e+06	1
expobiome_smorf_12251639																															7.5665e+07	1	3.10535e+07	1
expobiome_smorf_12252353																																													8.967e+06	1
expobiome_smorf_12252624	1.30695e+07	1																									2.01903e+06	1
expobiome_smorf_12253058					2.19188e+07	1											5.94359e+07	2							9.28995e+07	1	1.18974e+07	1							1.16855e+07	1							1.52935e+07	1	6.6809e+07	1
expobiome_smorf_12253485									5.59454e+07	1	4.14044e+06	1																																	1.10689e+07	1
expobiome_smorf_12253916	3.07909e+07	1	5.55184e+07	2							4.14199e+07	1					1.5631e+07	1									4.20774e+07	2									5.66397e+07	2							2.69063e+07	1
expobiome_smorf_12254298	1.73406e+07	1																											7.82349e+07	2															1.61074e+07	2
expobiome_smorf_12254404											1.26124e+08	2	3.65461e+07	3													9.16538e+06	1															8.54332e+07	1	3.99271e+06	1
expobiome_smorf_12254736											3.28268e+07	1					1.15197e+08	2
expobiome_smorf_12255501													6.53972e+07	1											1.58198e+08	3									3.91498e+07	1			1.48513e+07	1
expobiome_smorf_12256419	2.17828e+07	1
expobiome_smorf_12256947	1.45097e+07	1	1.17362e+07	1																											1.07633e+07	1	1.021e+07	1							2.68842e+07	1
expobiome_smorf_12257167																																			1.04095e+07	1									8.50302e+06	1
expobiome_smorf_12259400	2.22042e+07	1																	1.44194e+07	1													2.40893e+07	2											5.05522e+07	1			1.96177e+07
expobiome_smorf_12259592	3.29175e+07	1							5.2217e+07	1							2.57993e+07	1					1.29749e+08	2					6.32407e+07	1											5.84827e+07	1	1.3043e+07	1	4.40867e+07	2
expobiome_smorf_12261712
expobiome_smorf_12261913																																			2.78353e+07	1
expobiome_smorf_12262195																									7.49344e+06	1
expobiome_smorf_12262611
expobiome_smorf_12262843	5.12604e+07	2											6.84379e+06	1			8.65158e+06	1															4.52861e+06	1
expobiome_smorf_12264316									3.57012e+06	1			1.35125e+07	1							7.20491e+06	1			3.33532e+06	1							5.79264e+06	1	1.44522e+07	2							2.41772e+07	1	1.98463e+07	1
expobiome_smorf_12264462
expobiome_smorf_12264634	1.1668e+07	2					8.14617e+06	1			7.04833e+07	2					4.15625e+07	1	1.72991e+08	4									1.68968e+07	1	3.38439e+07	2					1.4998e+07	1			6.84876e+07	2			6.22386e+07	3			2.58556e+07
expobiome_smorf_12264643									6.4157e+06	1	3.02072e+07	2																					1.15194e+07	1							1.79771e+07	1			1.37847e+07	1
expobiome_smorf_12264766																							3.47936e+07	1
expobiome_smorf_12265225																							1.54457e+07	1																	1.0973e+07	1
expobiome_smorf_12265696			2.0355e+07	2																																					9.99142e+06	1
expobiome_smorf_12266342																																													5.15347e+07	1
expobiome_human_023883	3.26038e+07	1			8.80463e+07	1	3.67897e+07	1																													3.97864e+07	1					1.24624e+07	1
expobiome_imp_02230961
expobiome_imp_03163829
expobiome_imp_06421318																											1.29051e+07	1									2.58551e+07	1
expobiome_imp_10655353											8.82012e+07	2			8.17146e+07	3			4.17757e+07	2
expobiome_imp_18823785	2.51296e+07	1																					1.45146e+07	1
expobiome_imp_31962101											1.78666e+07	1											3.40804e+06	1
expobiome_imp_32001451
expobiome_imp_32339734					2.25526e+07	1							4.42634e+07	1							1.07643e+07	1	1.36474e+07	1	3.19327e+07	1	2.53742e+07	1
expobiome_imp_38398567																					1.77703e+07	1					1.88111e+07	1
expobiome_imp_47466416											2.21849e+07	1													4.23161e+07	2					1.20226e+08	2																	1.89113e+07
expobiome_imp_47494624
expobiome_imp_47540063
expobiome_imp_47552268																	2.78633e+07	1													5.69179e+06	1
expobiome_imp_47557377																											1.5865e+07	1							6.20782e+06	1	1.99304e+07	2							8.39285e+07	2	7.64682e+06	1
expobiome_imp_47683123	5.86488e+07	2							1.60557e+06	1															7.01628e+07	2					5.31288e+07	1					3.55524e+07	2	5.27669e+07	2	3.53719e+07	1	2.39064e+07	2					1.1634e+07
expobiome_imp_47716613
expobiome_imp_47754247
expobiome_imp_47754440
expobiome_imp_47903057																																																	4.24968e+07
expobiome_imp_58948688											1.88164e+08	1
expobiome_imp_68582127																			1.3974e+08	2																					1.62424e+07	1							2.87819e+07
expobiome_imp_68739850			1.95959e+07	1
expobiome_imp_68784665											2.81631e+07	1					5.65027e+07	1							4.33849e+07	1																			1.7019e+07	1
expobiome_imp_68796653					1.69853e+07	1	3.45079e+06	1															5.34694e+06	1
expobiome_imp_68980584					9.66206e+06	1
expobiome_smorf_00249224																									1.22395e+07	1
expobiome_smorf_01187162																									2.03792e+07	1
expobiome_smorf_01187807
expobiome_smorf_01287054
expobiome_smorf_02152421			1.3249e+08	1	1.97473e+08	1											8.70916e+07	1					4.74564e+06	1	2.34263e+07	1															2.02435e+07	1	1.17617e+08	1			1.49839e+07	1
expobiome_smorf_02157529															1.90219e+07	1									5.28733e+07	1
expobiome_smorf_02158311							3.34125e+08	2
expobiome_smorf_02159300			4.08431e+07	1															1.55214e+08	2
expobiome_smorf_02164740																					7.29849e+06	1
expobiome_smorf_02169346									3.16439e+07	2					1.7881e+07	1
expobiome_smorf_02175723					7.09918e+07	1	2.77643e+07	2
expobiome_smorf_02187936			7.81407e+06	1													5.05828e+07	1																			4.58275e+06	1											8.0498e+06
expobiome_smorf_02187943																	1.04137e+07	1
expobiome_smorf_02197511			3.35841e+06	2					1.02522e+07	1
expobiome_smorf_02200210					2.69268e+07	1	2.50332e+07	1			1.91404e+08	3
expobiome_smorf_02200995			5.0639e+07	1
expobiome_smorf_02210537
expobiome_smorf_02598195															2.21985e+07	1
expobiome_smorf_02604894							5.72021e+07	1					4.38407e+07	2																									4.01357e+07	1
expobiome_smorf_02610821									2.65016e+08	2															3.853e+07	1																							2.4992e+07
expobiome_smorf_02612489																									1.40106e+07	1																							1.05077e+07
expobiome_smorf_02820745									8.06493e+07	1	1.30774e+07	1	7.72618e+07	2													5.51656e+06	1															4.1844e+07	2
expobiome_smorf_02821361	1.53249e+07	1					4.9459e+06	1			3.2882e+06	1															1.58894e+07	1							3.21472e+07	1
expobiome_smorf_02821653									2.74259e+06	1
expobiome_smorf_02822087																																					1.34971e+07	1							1.22162e+07	1
expobiome_smorf_02823267													3.86714e+07	2																							4.40984e+06	1							9.0087e+06	1
expobiome_smorf_02826245	5.5132e+06	1	2.42413e+07	1					1.32131e+07	1																	1.69597e+07	1							2.76267e+07	1							8.20974e+06	1
expobiome_smorf_02826364									1.06751e+07	1																													3.96568e+07	1
expobiome_smorf_02826365	1.21154e+08	1							1.60625e+08	2							1.52383e+07	1	2.50967e+07	1					2.2494e+08	2					3.18314e+08	2					3.77244e+08	4	2.39336e+08	3	2.45367e+08	2	1.00694e+08	3
expobiome_smorf_02827056	9.13562e+07	1	5.72919e+07	1					2.60082e+08	2							2.15609e+08	2													1.13372e+08	1			4.78442e+07	1													5.14173e+07
expobiome_smorf_02827808					8.20102e+06	1													1.45718e+07	1							3.61716e+07	1			1.56528e+07	1			1.19038e+08	2			1.78291e+08	4	2.27822e+07	1
expobiome_smorf_02829661			1.34188e+08	2							2.83096e+08	3	1.57124e+08	2	2.30509e+07	1	2.14156e+07	1					3.38416e+07	1			1.0064e+08	2							1.7432e+07	1	4.84466e+07	1	7.79233e+07	1	9.72823e+07	2			5.12387e+06	1
expobiome_smorf_02830220													1.52798e+07	1													5.37375e+06	1							6.05996e+06	1											7.79733e+06	1
expobiome_smorf_02831378	5.3729e+07	3													4.44548e+07	3	7.87589e+07	1									7.0664e+07	3									2.37125e+07	1	5.54574e+07	2	9.27602e+06	1			1.37504e+08	1			8.58377e+07
expobiome_smorf_02833912	1.92421e+07	1													7.21479e+06	1																			1.3616e+07	1	1.35066e+07	1			1.64857e+07	1							4.33378e+07
expobiome_smorf_02834091	1.63133e+08	1							1.19759e+08	1	8.3849e+07	1					6.66173e+07	1													1.68399e+08	1													1.328e+08	1			9.82361e+07
expobiome_smorf_02834728			5.02571e+06	1											6.30881e+07	2	5.71912e+07	1			5.01779e+06	1					2.58286e+07	2	1.53143e+07	2									1.56378e+08	4	5.69661e+07	2			2.54298e+06	1	2.72392e+07	2
expobiome_smorf_02834963	2.42788e+07	1	1.30549e+07	1									3.5135e+06	1													8.62254e+06	1							4.47406e+07	1					4.70099e+07	2	1.06503e+07	1					3.48087e+07
expobiome_smorf_02834978
expobiome_smorf_02836271
expobiome_smorf_02836418	6.15526e+06	1					2.98666e+06	1	2.61124e+07	1							2.14695e+07	1									1.22373e+07	1
expobiome_smorf_02836441	1.98086e+07	1							1.76297e+07	1	1.29183e+08	1
expobiome_smorf_02836506											4.00702e+07	1
expobiome_smorf_02838349																																					9.40003e+06	1			1.72735e+07	1
expobiome_smorf_02839707													3.07234e+07	2																					1.67882e+07	1	9.75064e+06	1
expobiome_smorf_02839708																																													7.7389e+06	1
expobiome_smorf_02839710													6.17624e+07	2													7.06956e+06	1																	3.90552e+07	1
expobiome_smorf_02839772													2.94499e+07	1																					1.06374e+07	1
expobiome_smorf_02840814	1.90612e+08	4							1.08518e+08	3							1.31979e+08	2	2.5805e+07	2					2.15503e+08	4					2.27997e+08	5					1.02654e+08	2	7.16068e+08	6	1.6519e+08	5	7.20058e+07	2					9.08887e+07
expobiome_smorf_02842352																																					2.65563e+06	1
expobiome_smorf_02842642	1.00472e+08	2	3.1736e+08	1													2.03287e+07	1									8.90605e+07	2											1.46002e+08	2
expobiome_smorf_02843044									3.01951e+07	1																					2.0911e+07	1			1.91102e+07	1							1.08141e+07	1
expobiome_smorf_02843045											5.62056e+06	1																									1.75701e+07	2			8.66974e+07	3
expobiome_smorf_02846460																	1.69537e+07	1									697580	1													1.42861e+06	1
expobiome_smorf_02848647											1.07533e+08	1																									1.95737e+07	1
expobiome_smorf_02849051							3.4779e+07	1			2.36482e+07	1
expobiome_smorf_02850406																																									3.99387e+07	1
expobiome_smorf_02851801											5.74713e+06	1	3.85244e+06	1									2.61127e+06	1																			3.34336e+07	2
expobiome_smorf_02851977																																											1.62308e+07	1
expobiome_smorf_02855415	4.86051e+07	1	9.8476e+06	1					1.38772e+07	1	7.58395e+06	1					1.77991e+07	1													6.04325e+06	1			1.41631e+07	1
expobiome_smorf_02855725	4.23303e+06	1					7.35573e+06	2
expobiome_smorf_02856458																			1.99835e+07	1	6.2567e+06	1													4.35193e+06	1									1.40339e+07	1
expobiome_smorf_02858594																																													1.82241e+08	1
expobiome_smorf_02859992																																							2.94406e+07	1
expobiome_smorf_02862371																															6.02602e+06	1
expobiome_smorf_02862396																															6.97003e+06	1
expobiome_smorf_02865857	4.16776e+07	2			2.88658e+07	1	1.71885e+07	1	7.15009e+07	1																	2.98014e+07	1	2.93172e+07	1	1.63236e+07	1													2.4481e+07	1	1.20323e+07	1
expobiome_smorf_02866223	1.88123e+07	2																																							1.10783e+07	1							3.32792e+06
expobiome_smorf_02866235	1.39907e+07	3
expobiome_smorf_02866236																																							8.40297e+06	1	1.17693e+07	1
expobiome_smorf_02867153	1.9121e+08	3							1.12593e+08	2							1.906e+08	4											1.4389e+07	1	1.92694e+08	4			9.58487e+07	4							4.29153e+07	3
expobiome_smorf_02867283																																																	1.05855e+07
expobiome_smorf_02870265
expobiome_smorf_02870266																																							2.65482e+06	1	1.71646e+07	2	1.14533e+07	2
expobiome_smorf_02871619															7.37783e+06	1	1.42729e+07	1																	1.85567e+07	1			1.05092e+07	1			5.90062e+06	1
expobiome_smorf_02872138													9.69973e+06	1
expobiome_smorf_02876888																																					5.75393e+06	1
expobiome_smorf_02877435	1.41653e+07	1											1.31669e+08	1																	4.69063e+07	1											1.95276e+08	2
expobiome_smorf_02880507									6.94263e+06	1	2.74363e+08	3																			6.13917e+07	2									3.05511e+08	3							6.32911e+06
expobiome_smorf_02880933													6.51757e+06	1											5.79873e+06	1	6.30044e+06	1			4.0362e+06	1			4.38706e+07	2			6.89833e+06	1			7.0174e+06	1
expobiome_smorf_02881489
expobiome_smorf_02882556																	1.56439e+07	1
expobiome_smorf_02885546			1.89023e+06	1																																													5.91549e+07
expobiome_smorf_03176192																																																	4.49811e+06
expobiome_smorf_03228892
expobiome_smorf_05291553
expobiome_smorf_05797116									1.65967e+07	1																													3.23329e+07	1					1.07492e+07	1
expobiome_smorf_06005968																																			8.1025e+06	1
expobiome_smorf_06008953											1.89335e+07	2											7.79031e+06	2																					6.07049e+06	1
expobiome_smorf_06020332															5.09616e+06	1					1.55834e+07	1															1.66082e+07	2	1.75159e+07	2	1.48878e+07	1					2.03641e+07	1
expobiome_smorf_06023753					2.22895e+07	1	4.54772e+07	1			2.00303e+08	1																									5.377e+07	2							6.8803e+07	1	1.15563e+07	1
expobiome_smorf_06027553
expobiome_smorf_06027833					2.20883e+06	1					1.78578e+08	1											1.00159e+08	1																					1.35222e+08	2
expobiome_smorf_06038740																			5.45033e+07	2																					6.55273e+06	1
expobiome_smorf_06039229																																									1.1777e+07	1							8.77634e+06
expobiome_smorf_06043967																							9.20046e+06	1													7.24658e+06	1
expobiome_smorf_06045018																			7.90792e+06	1
expobiome_smorf_06045866															8.34509e+06	1
expobiome_smorf_06049752																			830472	1
expobiome_smorf_06050627																									1.26885e+07	1															1.20091e+07	1
expobiome_smorf_06060640					2.23675e+07	1					9.06534e+07	2									3.01551e+06	1	2.6168e+07	1																					1.94104e+07	1
expobiome_smorf_06066414											1.13066e+07	1																																	2.43922e+07	1
expobiome_smorf_06067141					4.29279e+07	1					1.37753e+07	1							3.18544e+07	1	2.50786e+07	1			2.86913e+07	1			3.05276e+07	1											2.85192e+08	1
expobiome_smorf_06069377											1.92685e+07	1											7.62237e+06	1
expobiome_smorf_06330733																																											5.07564e+07	1
expobiome_smorf_06331430																																									1.84803e+07	1
expobiome_smorf_06344246																											1.39419e+07	1																	1.13768e+07	1
expobiome_smorf_06364388							1.08923e+08	3
expobiome_smorf_06372086							8.14496e+07	4			3.92716e+07	1									6.02757e+06	1																									9.18413e+06	1
expobiome_smorf_06378849
expobiome_smorf_06612273
expobiome_smorf_06777591
expobiome_smorf_06799787																			6.61599e+07	3					1.08698e+08	1
expobiome_smorf_06841034
expobiome_smorf_06869969									3.43229e+07	1			1.48668e+07	1									8.84762e+06	1													1.01082e+07	1					1.57969e+07	1
expobiome_smorf_06871595																																									6.83594e+06	1	6.18817e+06	1
expobiome_smorf_07030565									1.59648e+07	1
expobiome_smorf_07043801																					1.26545e+07	1			2.86692e+07	1															9.68055e+06	1
expobiome_smorf_07045174																					8.77661e+07	2			5.77629e+07	1
expobiome_smorf_07049723																									4.24493e+07	1
expobiome_smorf_07053157																									1.94646e+07	1															2.91976e+07	1
expobiome_smorf_07053272																									5.60381e+06	1
expobiome_smorf_07054554																																									1.71167e+07	1
expobiome_smorf_07054555																																									1.65177e+07	1
expobiome_smorf_07054872																					1.03184e+08	3			1.31372e+08	3															6.47011e+07	3
expobiome_smorf_07059273																									2.6093e+07	1															3.9028e+07	1
expobiome_smorf_07061156																									1.44705e+08	3															3.14438e+07	2
expobiome_smorf_07063609																					1.3019e+07	1			1.78485e+07	1
expobiome_smorf_07074344													1.85591e+07	2													7.8335e+06	1							4.15398e+06	1									2.02768e+07	1
expobiome_smorf_07985426																															6.412e+06	1
expobiome_smorf_08330465
expobiome_smorf_08477574
expobiome_smorf_08768593
[truncated: 8,358 more rows]
[truncated: 33 more columns]
